# Supplementary material for: Latitude-dependent oxygen fugacity in arc magmas
Source: Nat Commun. 2024 Jul 18;15:6050. doi: 10.1038/s41467-024-50337-6 (PMC11258285; doi:10.1038/s41467-024-50337-6)
Supplement: Supplementary file 4 — Supplementary Data 1 [file 41467_2024_50337_MOESM4_ESM.xlsx]

## Sheet: Sheet1
Supplementary Table 1. Compiled measured oxygen fucacity data (DFMQ) of basaltic rocks in different arc segments.
Location	Latitude	Longitude	Ave. Latitude (1)	Ave. Latitude (2)	Material	Size of MI (mm)	Homogenisation§	Fo of Ol*	MgO of MI (wt.%)*	Fe3+/Fetot of MI*	S content of MI (wt.%)*	DV-Ol	DFMQ	Ave. DFMQ (1)	std	Ave. DFMQ (2)	Ave. DFMQ (3)	Methods	Reference
Agrigan, Mariana	18.72	145.66	18.72	17.668	Ol-host inclusion	50~200	No	80 (90)	5.19 (12.7)	0.28 (0.22)	0.15		1.58	1.21615	0.211799	1.18714	1.23043	μ-XANES Fe	Kelley & Cottrell (2012)
Agrigan, Mariana	18.72	145.66			Ol-host inclusion		No	81 (90)	5.27 (12.9)	0.23 (0.18)	0.08		0.97					μ-XANES Fe	Kelley & Cottrell (2012)
Agrigan, Mariana	18.72	145.66			Ol-host inclusion		No	82 (90)	4.59 (11.52)	0.27 (0.21)	0.16		1.38					μ-XANES Fe	Kelley & Cottrell (2012)
Agrigan, Mariana	18.72	145.66			Ol-host inclusion		No	81 (90)	4.62 (12.12)	0.24 (0.18)	0.11		1.02					μ-XANES Fe	Kelley & Cottrell (2012)
Agrigan, Mariana	18.72	145.66			Ol-host inclusion		No	81 (90)	5.24 (12.75)	0.24 (0.19)	0.12		1.16					μ-XANES Fe	Kelley & Cottrell (2012)
Agrigan, Mariana	18.72	145.66			Ol-host inclusion		No	80 (90)	5.36 (13.82)	0.24 (0.18)	0.15		1.11					μ-XANES Fe	Kelley & Cottrell (2012)
Agrigan, Mariana	18.72	145.66			Ol-host inclusion	50~300	No	82 (90)	4.12 (13.43)	0.25 (0.18)	0.11		1.09					μ-XANES Fe	Brounce et al. (2014)
Guguan, Mariana	17.3	145.83	17.3		Ol-host inclusion		No	78 (90)	5.37 (16.64)	0.23 (0.17)	0.14		1			1.31		μ-XANES Fe	Kelley & Cottrell (2009)
Guguan, Mariana	17.3	145.83			Ol-host inclusion		No	84 (90)	4.75 (10.09)	0.25 (0.24)	0.09		1.62					μ-XANES Fe	Brounce et al. (2014)
Sarigan, Mariana	16.63	145.81	16.63		Ol-host inclusion		No	83 (90)	4.35 (10.21)	0.28 (0.22)	0.05		1.16			1.225		μ-XANES Fe	Kelley & Cottrell (2009)
Sarigan, Mariana	16.63	145.81			Ol-host inclusion		No	87 (90)	6.40 (10.93)	0.24 (0.22)	0.14		1.29					μ-XANES Fe	Brounce et al. (2014)
Pagan, Mariana	18.11	145.8	18.11		Ol-host inclusion		No	79 (90)	5.44 (13.18)	0.22 (0.19)	0.04		1.09			1.09		μ-XANES Fe	Brounce et al. (2014)
Alamagan, Mariana	17.58	145.81	17.58		Ol-host inclusion		No	87 (90)	6.21 (10.44)	0.24 (0.22)	0.11		1.34			1.34		μ-XANES Fe	Brounce et al. (2014)
Aboa, New Hebrides	-15.47	167.84	-15.47	-15.47	Ol-host inclusion	>50	No	90 (90)	8.00 (11.01)	0.30 (0.28)	0.27002		1.37049	1.22816	0.138802	1.22816	1.22816	μ-XANES Fe	Gaborieau et al. (2020)
Aboa, New Hebrides	-15.47	167.84			Ol-host inclusion		No	91 (90)	7.45 (14.40)	0.36 (0.24)	0.13128		1.12851					μ-XANES Fe	Gaborieau et al. (2020)
Aboa, New Hebrides	-15.47	167.84			Ol-host inclusion		No	89 (90)	7.21 (10.62)	0.32 (0.26)	0.10782		1.32236					μ-XANES Fe	Gaborieau et al. (2020)
Aboa, New Hebrides	-15.47	167.84			Ol-host inclusion		No	91 (90)	7.56 (14.68)	0.28 (0.23)	0.07666		1.09128					μ-XANES Fe	Gaborieau et al. (2020)
Aboa, New Hebrides	-15.47	167.84			Ol-host inclusion		No	88 (88)	6.82 (10.08)	0.31 (0.28)	0.06136		1.77154	1.75648	0.241814	1.75648	1.75648	μ-XANES Fe	Gaborieau et al. (2020)
Aboa, New Hebrides	-15.47	167.84			Ol-host inclusion		No	85 (84)	7.15 (7.48)	0.32 (0.32)	0.06894		1.99042					μ-XANES Fe	Gaborieau et al. (2020)
Aboa, New Hebrides	-15.47	167.84			Ol-host inclusion		No	86 (87)	6.67 (8.47)	0.29 (0.27)	0.05458		1.50749					μ-XANES Fe	Gaborieau et al. (2020)
BORG, Cascades	40.6597	-121.239	40.6597	40.5514	Ol-host inclusion	134	No	85	6.07 (12.01)	0.215691	0.12		1.41627	1.17126	0.458923	1.41627	1.17126	μ-XANES Fe	Muth & Wallace (2021)
BBL, Cascades	40.5843	-121.617	40.5843		Ol-host inclusion	76	No	85	6.53 (14.09)	0.173837	0.1		0.950031			0.950031		μ-XANES Fe	Muth & Wallace (2021)
BRM, Cascades	40.5746	-121.588	40.5746		Ol-host inclusion	75	No	88	4.6 (9.25)	0.277305	0.22		1.95381			1.95381		μ-XANES Fe	Muth & Wallace (2021)
BRVB, Cascades	40.5302	-121.075	40.5302		Ol-host inclusion	63	No	84	6.64 (13.35)	0.200656	0.16		1.17852			1.17852		μ-XANES Fe	Muth & Wallace (2021)
BPPC, Cascades	40.3288	-121.913	40.3288		Ol-host inclusion	73	No	88	6.96 (11.10)	0.170453	0.11		0.782757			0.782757		μ-XANES Fe	Muth & Wallace (2021)
BAS-44, Cascades	40.6309	-121.345	40.6309		Ol-host inclusion	66	No	87	7.52 (12.44)	0.169484	0.11		0.746169			0.746169		μ-XANES Fe	Muth & Wallace (2021)
Los Hornitos Cones, Southern Andes	-35.72	-70.85	-35.72	-35.72	Ol-host inclusion	95	No	91.3	9.09	0.3311	0.22		2.19	1.91333	0.240901	1.91333	1.91333	μ-XANES Fe	Tassara et al. (2020)
Los Hornitos Cones, Southern Andes	-35.72	-70.85			Ol-host inclusion	60	No	91.76	9.86	0.2877	0.26		1.75					μ-XANES Fe	Tassara et al. (2020)
Los Hornitos Cones, Southern Andes	-35.72	-70.85			Ol-host inclusion	42	No	91.28	9.54	0.2919	0.3		1.8					μ-XANES Fe	Tassara et al. (2020)
Los Hornitos Cones, Southern Andes	-35.72	-70.85			Ol-host inclusion	50	No	91.21	8.7	0.3825	0.31		2.69	2.46	0.185293	2.46	2.46	μ-XANES Fe	Tassara et al. (2020)
Los Hornitos Cones, Southern Andes	-35.72	-70.85			Ol-host inclusion	60	No	91.37	9.53	0.3399	0.28		2.32					μ-XANES Fe	Tassara et al. (2020)
Los Hornitos Cones, Southern Andes	-35.72	-70.85			Ol-host inclusion	40	No	91.53	9.3	0.3658	0.29		2.53					μ-XANES Fe	Tassara et al. (2020)
Los Hornitos Cones, Southern Andes	-35.72	-70.85			Ol-host inclusion	50	No	91.49	9.83	0.336	0.24		2.3					μ-XANES Fe	Tassara et al. (2020)
Augustine, Aleutians	59.33	-153.43	59.33	59.33	Ol-host inclusion	50~300	No	82 (90)	4.43 (11.20)	0.3 (0.23)	0.41		1.52	1.52		1.52	1.52	μ-XANES Fe	Kelley & Cottrell (2009)
Glacier Peak, Cascades	48.05	-121.11	48.05	49.1167	Ol-host inclusion	15~40	Yes	87	5.57	0.17	0.19		1.26	1.23	0.226495	1.26	1.23	S-species	Venugopal et al. (2020)
Mount Baker, Cascades	48.72	-121.82	48.72		Ol-host inclusion		Yes	82	3.9	0.19	0.11		0.99			0.99		S-species	Venugopal et al. (2020)
Mount Meager, Cascades	50.58	-123.51	50.58		Ol-host inclusion		Yes	81	5.14	0.23	0.27		1.44			1.44		S-species	Venugopal et al. (2020)
Kawah Ijen, Sunda	-8.16	114.24	-8.16	-7.642	Ol-host inclusion	60~230	No	78.5239	4.20 (4.90)		0.207115		1.67	1.26	0.584099	1.57	1.074	S-species	Vigouroux et al. (2012)
Kawah Ijen, Sunda	-8.16	114.24			Ol-host inclusion		No	78.7119	5.80 (5.84)		0.190011		1.4					S-species	Vigouroux et al. (2012)
Kawah Ijen, Sunda	-8.16	114.24			Ol-host inclusion		No	79.8305	4.10 (5.74)		0.140064		1.2					S-species	Vigouroux et al. (2012)
Kawah Ijen, Sunda	-8.16	114.24			Ol-host inclusion		No	78.0906	4.60 (5.17)		0.216366		2.01					S-species	Vigouroux et al. (2012)
Krakatau, Sunda	-6.18	105.42	-6.18		Ol-host inclusion	<100	No				0.04		0.2			0.2		S-species	de Hoog et al. (2001)
Guntur, Sunda	-7.09	110.61	-7.09		Ol-host inclusion		No				0.03		1.7			1.7		S-species	de Hoog et al. (2001)
Batur, Sunda	-8.3	115.28	-8.3		Ol-host inclusion		No				0.03		1.2			1.2		S-species	de Hoog et al. (2001)
Boleng, Sunda	-8.48	120.08	-8.48		Ol-host inclusion		No				0.08		0.7			0.7		S-species	de Hoog et al. (2001)
Augustine, Aleutians	59.33	-153.43	59.33	55.175	Ol-host inclusion	90	No	81	2.43 (5.70)		0.31		1.6	1.56667	0.320416	1.6	1.56667	S-species	Zimmer et al. (2010)
Emmons, Aleutians	55.28	-162.08	55.28		Ol-host inclusion	81	No	76	2.01 (4.69)		0.07		1			1		S-species	Zimmer et al. (2010)
Shishaldin, Aleutians	54.7	-163.87	54.7		Ol-host inclusion	57	No	68	3.31 (4.98)		0.05		1.8			1.8		S-species	Zimmer et al. (2010)
Akutan, Aleutians	54.05	-165.94	54.05		Ol-host inclusion	71	No	71	2.00 (4.07)		0.03		1.4			1.4		S-species	Zimmer et al. (2010)
Seguam, Aleutians	52.29	-172.47	52.29		Ol-host inclusion	108	No	82	3.89 (6.11)		0.06		1.8			1.8		S-species	Zimmer et al. (2010)
Korovin, Aleutians	55.4	-174.16	55.4		Ol-host inclusion	151	No	78	3.98 (6.01)		0.29		1.8			1.8		S-species	Zimmer et al. (2010)
Oshima, Izu-Bonin	34.7	139.39	34.7	34.7	Ol-host inclusion	10~200	No	77	7.32		0.15		1.40741	1.11358	0.360797	1.49755	1.22877	S-species	Ikehata et al. (2010)
Oshima, Izu-Bonin	34.7	139.39			Ol-host inclusion		No	72	5.68		0.06		1.58769					S-species	Ikehata et al. (2010)
Dredge, Izu-Bonin	30.69	140.02			Ol-host inclusion	—	No	81.5	6.18 (6.18)		0.119		1			0.96		S-species	Rowe et al. (2007)
Dredge, Izu-Bonin	30.69	140.02			Ol-host inclusion		No	81.3	5.54 (5.88)		0.098		1.3					S-species	Rowe et al. (2007)
Dredge, Izu-Bonin	30.69	140.02			Ol-host inclusion		No	81.7	5.29 (6.90)		0.109		0.5					S-species	Rowe et al. (2007)
Dredge, Izu-Bonin	30.69	140.02			Ol-host inclusion		No	82.2	6.28 (5.98)		0.167		0.9					S-species	Rowe et al. (2007)
Dredge, Izu-Bonin	30.69	140.02			Ol-host inclusion		No	82.7	5.66 (6.03)		0.156		1.1					S-species	Rowe et al. (2007)
Puñalica, Northern Andes	-1.35	-78.64	-1.35	-1.675	Ol-host inclusion	>30	Yes	84	4.3	0.16	0.13		0.774985	0.984995	0.166487	0.949643	1.02035	S-species	Narvaez et al. (2018)
Puñalica, Northern Andes	-1.35	-78.64			Ol-host inclusion		Yes	83	7.4	0.2	0.33		1.1428					S-species	Narvaez et al. (2018)
Puñalica, Northern Andes	-1.35	-78.64			Ol-host inclusion		Yes	84	7.11	0.23	0.36		0.931147					S-species	Narvaez et al. (2018)
Sangay, Northern Andes	-2	-78.33	-2		Ol-host inclusion		Yes	88	8.06	0.28	0.45		1.09105			1.09105		S-species	Narvaez et al. (2018)
Fuego, Central American	14.28	-90.87	14.28	14.28	Ol-host inclusion	~29	No	72.2905	3.91	0.147674	0.2354	0.0179823	1.61789	1.36611	0.274394	1.36611	1.36611	Ol-melt V partitioning||	Lloyd et al. (2013)
Fuego, Central American	14.28	-90.87			Ol-host inclusion	~29	No	72.2072	3.94	0.153009	0.1027	0.0236738	1.23743					Ol-melt V partitioning||	Lloyd et al. (2013)
Fuego, Central American	14.28	-90.87			Ol-host inclusion	~29	No	72.9451	3.65	0.164656	0.0637	0.0281705	0.996077					Ol-melt V partitioning||	Lloyd et al. (2013)
Fuego, Central American	14.28	-90.87			Ol-host inclusion	~33	No	73.2759	3.58	0.200159	0.0878	0.029155	0.948321					Ol-melt V partitioning||	Lloyd et al. (2013)
Fuego, Central American	14.28	-90.87			Ol-host inclusion	~48	No	73.4112	4.25	0.156227	0.1745	0.021266	1.38599					Ol-melt V partitioning||	Lloyd et al. (2013)
Fuego, Central American	14.28	-90.87			Ol-host inclusion	~48	No	73.6844	4.49	0.171943	0.1643	0.0235225	1.24632					Ol-melt V partitioning||	Lloyd et al. (2013)
Fuego, Central American	14.28	-90.87			Ol-host inclusion	~29	No	73.5763	4.36	0.18641	0.2022	0.0218607	1.34781					Ol-melt V partitioning||	Lloyd et al. (2013)
Fuego, Central American	14.28	-90.87			Ol-host inclusion	~29	No	73.883	4.52	0.14286	0.2647	0.0233878	1.25428					Ol-melt V partitioning||	Lloyd et al. (2013)
Fuego, Central American	14.28	-90.87			Ol-host inclusion	~48	No	76.4459	4.55	0.199549	0.2518	0.0158612	1.79117					Ol-melt V partitioning||	Lloyd et al. (2013)
Fuego, Central American	14.28	-90.87			Ol-host inclusion	~29	No	77.1395	4.85	0.184247	0.2826	0.0202388	1.45449					Ol-melt V partitioning||	Lloyd et al. (2013)
Fuego, Central American	14.28	-90.87			Ol-host inclusion	~29	No	77.6028	5.52	0.149832	0.2404	0.0163717	1.74745					Ol-melt V partitioning||	Lloyd et al. (2013)
Lake Karymskoe, Kamchatka	53.88	159.46	53.88	53.15	Ol-host inclusion	57.5	Yes	80.1	12.34		0.14	0.0198039	1.48453	2.14025	0.44779	2.38298	2.06945	Ol-melt V partitioning||	Tobelko et al. (2019)
Lake Karymskoe, Kamchatka	53.88	159.46			Ol-host inclusion	50.5	No	88	13.75		0.17	0.0123346	2.13774					Ol-melt V partitioning||	Tobelko et al. (2019)
Lake Karymskoe, Kamchatka	53.88	159.46			Ol-host inclusion	77	No	83	13.2		0.09	0.0166802	1.72169					Ol-melt V partitioning||	Tobelko et al. (2019)
Lake Karymskoe, Kamchatka	53.88	159.46			Ol-host inclusion	42	No	87.4	12.87		0.18	0.00993289	2.43569					Ol-melt V partitioning||	Tobelko et al. (2019)
Lake Karymskoe, Kamchatka	53.88	159.46			Ol-host inclusion	143	No	87.8	3.09		0.23	0.00875339	2.60944					Ol-melt V partitioning||	Tobelko et al. (2019)
Lake Karymskoe, Kamchatka	53.88	159.46			Ol-host inclusion	68.5	No	87.2	3.47		0.28	0.00622685	3.07702					Ol-melt V partitioning||	Tobelko et al. (2019)
Lake Karymskoe, Kamchatka	53.88	159.46			Ol-host inclusion	128.5	No	86.4	3.58		0.22	0.00971751	2.46583					Ol-melt V partitioning||	Tobelko et al. (2019)
Lake Karymskoe, Kamchatka	53.88	159.46			Ol-host inclusion	190	No	86.7	3.3		0.21	0.0105774	2.34923					Ol-melt V partitioning||	Tobelko et al. (2019)
Lake Karymskoe, Kamchatka	53.88	159.46			Ol-host inclusion	124	No	87.2	3.64		0.22	0.00768539	2.78817					Ol-melt V partitioning||	Tobelko et al. (2019)
Lake Karymskoe, Kamchatka	53.88	159.46			Ol-host inclusion	151.8	No	86.1	3.75		0.25	0.00817232	2.7038					Ol-melt V partitioning||	Tobelko et al. (2019)
Lake Karymskoe, Kamchatka	53.88	159.46			Ol-host inclusion	58	No	86.3	3.34		0.21	0.0116719	2.21376					Ol-melt V partitioning||	Tobelko et al. (2019)
Lake Karymskoe, Kamchatka	53.88	159.46			Ol-host inclusion	56.2	No	87.2	3.91		0.25	0.00671875	2.97269					Ol-melt V partitioning||	Tobelko et al. (2019)
Lake Karymskoe, Kamchatka	53.88	159.46			Ol-host inclusion	60.7	No	85.9	3.05		0.16	0.00925926	2.53223					Ol-melt V partitioning||	Tobelko et al. (2019)
Lake Karymskoe, Kamchatka	53.88	159.46			Ol-host inclusion	46.4	No	76.8	2.59		0.17	0.0133333	2.03051					Ol-melt V partitioning||	Tobelko et al. (2019)
Lake Karymskoe, Kamchatka	53.88	159.46			Ol-host inclusion	36.55	No	79.4	2.39		0.18	0.0114286	2.24276					Ol-melt V partitioning||	Tobelko et al. (2019)
Lake Karymskoe, Kamchatka	53.88	159.46			Ol-host inclusion	39.9	No	83.5	3.81		0.21	0.010506	2.35855					Ol-melt V partitioning||	Tobelko et al. (2019)
Lake Karymskoe, Kamchatka	53.88	159.46			Ol-host inclusion	—	No	83.3	3.13		0.2	0.00826464	2.68837					Ol-melt V partitioning||	Tobelko et al. (2019)
Lake Karymskoe, Kamchatka	53.88	159.46			Ol-host inclusion	26.8	No	87.2	3.99		0.23	0.00942529	2.50781					Ol-melt V partitioning||	Tobelko et al. (2019)
Lake Karymskoe, Kamchatka	53.88	159.46			Ol-host inclusion	119.6	No	80.3	2.45		0.12	0.0140653	1.95687					Ol-melt V partitioning||	Tobelko et al. (2019)
Mutnovsky, Kamchatka	52.42	158.2	52.42		Ol-host inclusion	110	No	79.2	4.34			0.019	1.54183			1.75592		Ol-melt V partitioning||	Shishkina et al. (2018)
Mutnovsky, Kamchatka	52.42	158.2			Ol-host inclusion	45	No	79.1	4.62			0.018	1.61654					Ol-melt V partitioning||	Shishkina et al. (2018)
Mutnovsky, Kamchatka	52.42	158.2			Ol-host inclusion	75	No	79.3	5.25			0.016	1.77915					Ol-melt V partitioning||	Shishkina et al. (2018)
Mutnovsky, Kamchatka	52.42	158.2			Ol-host inclusion	140	No	79.5	5.07			0.015	1.86817					Ol-melt V partitioning||	Shishkina et al. (2018)
Mutnovsky, Kamchatka	52.42	158.2			Ol-host inclusion	45	No	79.8	5.32			0.016	1.77915					Ol-melt V partitioning||	Shishkina et al. (2018)
Mutnovsky, Kamchatka	52.42	158.2			Ol-host inclusion	100	No	79.5	5.72			0.015	1.86817					Ol-melt V partitioning||	Shishkina et al. (2018)
Mutnovsky, Kamchatka	52.42	158.2			Ol-host inclusion	100	No	78.2	5.71			0.017	1.69547					Ol-melt V partitioning||	Shishkina et al. (2018)
Mutnovsky, Kamchatka	52.42	158.2			Ol-host inclusion	127	No	78.6	5.29			0.016	1.77915					Ol-melt V partitioning||	Shishkina et al. (2018)
Mutnovsky, Kamchatka	52.42	158.2			Ol-host inclusion	75	No	78.6	4.86			0.015	1.86817					Ol-melt V partitioning||	Shishkina et al. (2018)
Mutnovsky, Kamchatka	52.42	158.2			Ol-host inclusion	78	Yes	80.9	5.29			0.014	1.96328					Ol-melt V partitioning||	Shishkina et al. (2018)
Mutnovsky, Kamchatka	52.42	158.2			Ol-host inclusion	70	Yes	84	6.61			0.018	1.61654					Ol-melt V partitioning||	Shishkina et al. (2018)
Mutnovsky, Kamchatka	52.42	158.2			Ol-host inclusion	63	Yes	81.2	5.5			0.017	1.69547					Ol-melt V partitioning||	Shishkina et al. (2018)
San Jose, Southern Andes	-33.85	-70.35	-33.85	-36.4114	Ol-host inclusion	69	No	81.39	3.21		0.1951	0.0174138	1.66191	1.65115	0.476505	1.38891	1.57181	Ol-melt V partitioning||	Grondahl & Zajacz (2022)
San Jose, Southern Andes	-33.85	-70.35			Ol-host inclusion	125	No	81.45	4.66		0.1724	0.0279518	1.0072					Ol-melt V partitioning||	Grondahl & Zajacz (2022)
San Jose, Southern Andes	-33.85	-70.35			Ol-host inclusion	60	No	81.74	4.13		0.5539	0.0221579	1.3317					Ol-melt V partitioning||	Grondahl & Zajacz (2022)
San Jose, Southern Andes	-33.85	-70.35			Ol-host inclusion	57	No	81.07	3.77		0.0994	0.0206829	1.42667					Ol-melt V partitioning||	Grondahl & Zajacz (2022)
San Jose, Southern Andes	-33.85	-70.35			Ol-host inclusion	48	No	81	3.06		0.2198	0.0212953	1.38655					Ol-melt V partitioning||	Grondahl & Zajacz (2022)
San Jose, Southern Andes	-33.85	-70.35			Ol-host inclusion	32	No	80.69	2.98		0.2658	0.0173932	1.66413					Ol-melt V partitioning||	Grondahl & Zajacz (2022)
San Jose, Southern Andes	-33.85	-70.35			Ol-host inclusion	32	No	81.42	3.76		0.277	0.0189175	1.55049					Ol-melt V partitioning||	Grondahl & Zajacz (2022)
San Jose, Southern Andes	-33.85	-70.35			Ol-host inclusion	34	No	81.57	2.93		0.2513	0.0181731	1.60501					Ol-melt V partitioning||	Grondahl & Zajacz (2022)
San Jose, Southern Andes	-33.85	-70.35			Ol-host inclusion	30	No	82.39	5.16		0.2623	0.027482	1.03309					Ol-melt V partitioning||	Grondahl & Zajacz (2022)
San Jose, Southern Andes	-33.85	-70.35			Ol-host inclusion	28	No	82.69	6.5		0.1941	0.022	1.34199					Ol-melt V partitioning||	Grondahl & Zajacz (2022)
San Jose, Southern Andes	-33.85	-70.35			Ol-host inclusion	25	No	82.46	4		0.2573	0.0201031	1.46507					Ol-melt V partitioning||	Grondahl & Zajacz (2022)
San Jose, Southern Andes	-33.85	-70.35			Ol-host inclusion	44	No	80.93	4.93		0.2525	0.0244444	1.19312					Ol-melt V partitioning||	Grondahl & Zajacz (2022)
Maipo, Southern Andes	-34.18	-70.72	-34.18		Ol-host inclusion	37	Yes	81.27	3.69		0.1844	0.0189474	1.54501			1.63255		Ol-melt V partitioning||	Grondahl & Zajacz (2022)
Maipo, Southern Andes	-34.18	-70.72			Ol-host inclusion	43	Yes	84.64	6.87		0.2245	0.0162687	1.75696					Ol-melt V partitioning||	Grondahl & Zajacz (2022)
Maipo, Southern Andes	-34.18	-70.72			Ol-host inclusion	34	Yes	81	2.25		0.2622	0.016749	1.71596					Ol-melt V partitioning||	Grondahl & Zajacz (2022)
Maipo, Southern Andes	-34.18	-70.72			Ol-host inclusion	21	Yes	83.38	4.93		0.234	0.018	1.61674					Ol-melt V partitioning||	Grondahl & Zajacz (2022)
Maipo, Southern Andes	-34.18	-70.72			Ol-host inclusion	23	Yes	84.51	10.7		0.2595	0.0157621	1.80103					Ol-melt V partitioning||	Grondahl & Zajacz (2022)
Maipo, Southern Andes	-34.18	-70.72			Ol-host inclusion	30	Yes	85.08	3.46		0.3093	0.0167692	1.71392					Ol-melt V partitioning||	Grondahl & Zajacz (2022)
Maipo, Southern Andes	-34.18	-70.72			Ol-host inclusion	65	Yes	83.94	4.93		0.2316	0.0232536	1.26364					Ol-melt V partitioning||	Grondahl & Zajacz (2022)
Maipo, Southern Andes	-34.18	-70.72			Ol-host inclusion	55	Yes	83.29	4.58		0.3152	0.0175984	1.64714					Ol-melt V partitioning||	Grondahl & Zajacz (2022)
Los Hornitos, Southern Andes	-35.68	-70.85	-35.68		Ol-host inclusion	56	No	84.68	5.58		0.2417	0.0162214	1.76116			1.92997		Ol-melt V partitioning||	Grondahl & Zajacz (2022)
Los Hornitos, Southern Andes	-35.68	-70.85			Ol-host inclusion	55	No	84	5.43		0.2445	0.0167883	1.7133					Ol-melt V partitioning||	Grondahl & Zajacz (2022)
Los Hornitos, Southern Andes	-35.68	-70.85			Ol-host inclusion	75	No	84.19	4.78		0.2428	0.0137079	1.99273					Ol-melt V partitioning||	Grondahl & Zajacz (2022)
Los Hornitos, Southern Andes	-35.68	-70.85			Ol-host inclusion	49	No	84.07	6.03		0.204	0.013871	1.97619					Ol-melt V partitioning||	Grondahl & Zajacz (2022)
Los Hornitos, Southern Andes	-35.68	-70.85			Ol-host inclusion	95	No	84.35	6.45		0.1929	0.0143874	1.92502					Ol-melt V partitioning||	Grondahl & Zajacz (2022)
Los Hornitos, Southern Andes	-35.68	-70.85			Ol-host inclusion	98	No	87.76	8.64		0.1707	0.0127431	2.09403					Ol-melt V partitioning||	Grondahl & Zajacz (2022)
Los Hornitos, Southern Andes	-35.68	-70.85			Ol-host inclusion	105	No	84.97	6.29		0.1894	0.0121959	2.15297					Ol-melt V partitioning||	Grondahl & Zajacz (2022)
Los Hornitos, Southern Andes	-35.68	-70.85			Ol-host inclusion	90	No	87.3	9.21		0.1863	0.0154724	1.82435					Ol-melt V partitioning||	Grondahl & Zajacz (2022)
Antuco, Southern Andes	-37.37	-71.67	-37.37		Ol-host inclusion	59	No	80.86	4.37		0.1176	0.0286047	0.975563			1.10809		Ol-melt V partitioning||	Grondahl & Zajacz (2022)
Antuco, Southern Andes	-37.37	-71.67			Ol-host inclusion	90	No	80.87	4.69		0.0965	0.0306275	0.881134					Ol-melt V partitioning||	Grondahl & Zajacz (2022)
Antuco, Southern Andes	-37.37	-71.67			Ol-host inclusion	50	No	80.89	4.74		0.0906	0.02625	1.09403					Ol-melt V partitioning||	Grondahl & Zajacz (2022)
Antuco, Southern Andes	-37.37	-71.67			Ol-host inclusion	53	No	80.9	3.7		0.1292	0.0220528	1.33654					Ol-melt V partitioning||	Grondahl & Zajacz (2022)
Antuco, Southern Andes	-37.37	-71.67			Ol-host inclusion	95	No	81.63	5.23		0.1154	0.0268675	1.06332					Ol-melt V partitioning||	Grondahl & Zajacz (2022)
Antuco, Southern Andes	-37.37	-71.67			Ol-host inclusion	65	No	80.03	4.74		0.1235	0.0276393	1.02357					Ol-melt V partitioning||	Grondahl & Zajacz (2022)
Antuco, Southern Andes	-37.37	-71.67			Ol-host inclusion	77	No	80.32	4.43		0.1561	0.0219088	1.34474					Ol-melt V partitioning||	Grondahl & Zajacz (2022)
Antuco, Southern Andes	-37.37	-71.67			Ol-host inclusion	88	No	80.27	4.28		0.0955	0.0277818	1.01535					Ol-melt V partitioning||	Grondahl & Zajacz (2022)
Antuco, Southern Andes	-37.37	-71.67			Ol-host inclusion	81	No	81.24	7.04		0.111	0.0246021	1.18435					Ol-melt V partitioning||	Grondahl & Zajacz (2022)
Antuco, Southern Andes	-37.37	-71.67			Ol-host inclusion	60	No	80.94	4.68		0.1223	0.0321101	0.812136					Ol-melt V partitioning||	Grondahl & Zajacz (2022)
Antuco, Southern Andes	-37.37	-71.67			Ol-host inclusion	95	No	80.43	4.35		0.1276	0.0297834	0.91869					Ol-melt V partitioning||	Grondahl & Zajacz (2022)
Antuco, Southern Andes	-37.37	-71.67			Ol-host inclusion	110	No	80.34	5.69		0.1008	0.0230225	1.27566					Ol-melt V partitioning||	Grondahl & Zajacz (2022)
Antuco, Southern Andes	-37.37	-71.67			Ol-host inclusion	58	No	82.49	6.62		0.1555	0.0198855	1.48011					Ol-melt V partitioning||	Grondahl & Zajacz (2022)
Llaima, Southern Andes	-38.74	-71.73	-38.74		Ol-host inclusion	43	No	82.52	5.16		0.1255	0.0206838	1.42422			1.42422		Ol-melt V partitioning||	Grondahl & Zajacz (2022)
Villarrica, Southern Andes	-39.34	-72.2	-39.34		Ol-host inclusion	44	No	81.03	5.09		0.1256	0.0174636	1.65853			1.31626		Ol-melt V partitioning||	Grondahl & Zajacz (2022)
Villarrica, Southern Andes	-39.34	-72.2			Ol-host inclusion	50	No	85.23	5.59		0.3213	0.0196774	1.49307					Ol-melt V partitioning||	Grondahl & Zajacz (2022)
Villarrica, Southern Andes	-39.34	-72.2			Ol-host inclusion	30	No	85.9	10.6		0.11	0.0257447	1.12194					Ol-melt V partitioning||	Grondahl & Zajacz (2022)
Villarrica, Southern Andes	-39.34	-72.2			Ol-host inclusion	28	No	83.05	18.5		0.0548	0.0260697	1.10311					Ol-melt V partitioning||	Grondahl & Zajacz (2022)
Villarrica, Southern Andes	-39.34	-72.2			Ol-host inclusion	24	No	86.62	17.4		0.077	0.0229189	1.28333					Ol-melt V partitioning||	Grondahl & Zajacz (2022)
Villarrica, Southern Andes	-39.34	-72.2			Ol-host inclusion	22	No	86.09	13		0.0814	0.0266061	1.07719					Ol-melt V partitioning||	Grondahl & Zajacz (2022)
Villarrica, Southern Andes	-39.34	-72.2			Ol-host inclusion	24	No	85.34	16.6		0.0298	0.0191489	1.53328					Ol-melt V partitioning||	Grondahl & Zajacz (2022)
Villarrica, Southern Andes	-39.34	-72.2			Ol-host inclusion	70	No	84.6	7.41		0.1052	0.0233193	1.25963					Ol-melt V partitioning||	Grondahl & Zajacz (2022)
Los Hornitos Cones, Southern Andes	-35.72	-70.85	-35.72		Ol-host inclusion	42	No	91.84	10.27		0.374633	0.0149	1.87739			2.20269		Ol-melt V partitioning||	Tassara et al. (2020)
Los Hornitos Cones, Southern Andes	-35.72	-70.85			Ol-host inclusion	42	No	90.01	8.082		0.291208	0.0147	1.89603					Ol-melt V partitioning||	Tassara et al. (2020)
Los Hornitos Cones, Southern Andes	-35.72	-70.85			Ol-host inclusion	65	No	91.45	9.01		0.180659	0.0144	1.92445					Ol-melt V partitioning||	Tassara et al. (2020)
Los Hornitos Cones, Southern Andes	-35.72	-70.85			Ol-host inclusion	85	No	90.5	8.213		0.241065	0.0141	1.95347					Ol-melt V partitioning||	Tassara et al. (2020)
Los Hornitos Cones, Southern Andes	-35.72	-70.85			Ol-host inclusion	75	No	92.11	10.294		0.254967	0.0148	1.88668					Ol-melt V partitioning||	Tassara et al. (2020)
Los Hornitos Cones, Southern Andes	-35.72	-70.85			Ol-host inclusion	55	No	88.95	7.674			0.0136	2.00323					Ol-melt V partitioning||	Tassara et al. (2020)
Los Hornitos Cones, Southern Andes	-35.72	-70.85			Ol-host inclusion	75	No	91.95	10.608		0.266036	0.0135	2.0134					Ol-melt V partitioning||	Tassara et al. (2020)
Los Hornitos Cones, Southern Andes	-35.72	-70.85			Ol-host inclusion	55	No	90.77	8.647		0.218216	0.013	2.06539					Ol-melt V partitioning||	Tassara et al. (2020)
Los Hornitos Cones, Southern Andes	-35.72	-70.85			Ol-host inclusion	40	No	91.65	9.934		0.12932	0.0132	2.04436					Ol-melt V partitioning||	Tassara et al. (2020)
Los Hornitos Cones, Southern Andes	-35.72	-70.85			Ol-host inclusion	90	No	89.2	7.307		0.295471	0.0119	2.18712					Ol-melt V partitioning||	Tassara et al. (2020)
Los Hornitos Cones, Southern Andes	-35.72	-70.85			Ol-host inclusion	70	No	91.08	9.481		0.285417	0.012	2.1756					Ol-melt V partitioning||	Tassara et al. (2020)
Los Hornitos Cones, Southern Andes	-35.72	-70.85			Ol-host inclusion	70	No	90.01	7.804		0.214963	0.011	2.29535					Ol-melt V partitioning||	Tassara et al. (2020)
Los Hornitos Cones, Southern Andes	-35.72	-70.85			Ol-host inclusion	35	No	91.32	9.221		0.241496	0.0119	2.18712					Ol-melt V partitioning||	Tassara et al. (2020)
Los Hornitos Cones, Southern Andes	-35.72	-70.85			Ol-host inclusion	48	No	92.12	10.574		0.282667	0.0125	2.1194					Ol-melt V partitioning||	Tassara et al. (2020)
Los Hornitos Cones, Southern Andes	-35.72	-70.85			Ol-host inclusion	65	No	88.95	7.115		0.227477	0.0103	2.38579					Ol-melt V partitioning||	Tassara et al. (2020)
Los Hornitos Cones, Southern Andes	-35.72	-70.85			Ol-host inclusion	90	No	90.5	8.177		0.261023	0.0099	2.44025					Ol-melt V partitioning||	Tassara et al. (2020)
Los Hornitos Cones, Southern Andes	-35.72	-70.85			Ol-host inclusion	40	No	91.06	9.059		0.221073	0.0096	2.48256					Ol-melt V partitioning||	Tassara et al. (2020)
Los Hornitos Cones, Southern Andes	-35.72	-70.85			Ol-host inclusion	30	No	90.99	9.199		0.299908	0.0093	2.5262					Ol-melt V partitioning||	Tassara et al. (2020)
Los Hornitos Cones, Southern Andes	-35.72	-70.85			Ol-host inclusion	100	No	91.37	9.749		0.174645	0.0086	2.63373					Ol-melt V partitioning||	Tassara et al. (2020)
Los Hornitos Cones, Southern Andes	-35.72	-70.85			Ol-host inclusion	65	No	91.2	8.896		0.225465	0.0068	2.9562					Ol-melt V partitioning||	Tassara et al. (2020)
Lassen Peak, Cascadia	40.7	-121.8	40.7	40.7	Ol-host inclusion	82.5	No	85	6.12			0.0234474	1.25075	1.24504	0.160431	1.24504	1.24504	Ol-melt V partitioning||	Humphreys et al. (2022)
Lassen Peak, Cascadia	40.7	-121.8			Ol-host inclusion	65	No	85	5.2			0.0254273	1.13834					Ol-melt V partitioning||	Humphreys et al. (2022)
Lassen Peak, Cascadia	40.7	-121.8			Ol-host inclusion	140	No	85	6.03			0.0257412	1.12132					Ol-melt V partitioning||	Humphreys et al. (2022)
Lassen Peak, Cascadia	40.7	-121.8			Ol-host inclusion	95	No	84	6.15			0.0200169	1.46974					Ol-melt V partitioning||	Humphreys et al. (2022)
Agrigan, Mariana	18.72	145.66	18.72	18.72	Ol-host inclusion	50~200	No	80.4	5.19	0.282	0.1474	0.0181651	1.60392	1.45659	0.395582	1.45659	1.45659	Ol-melt V partitioning||	Kelley & Cottrell (2012)
Agrigan, Mariana	18.72	145.66			Ol-host inclusion		No	72.7	3.22	0.219	0.0771	0.0253968	1.14					Ol-melt V partitioning||	Kelley & Cottrell (2012)
Agrigan, Mariana	18.72	145.66			Ol-host inclusion		No	81.5	4.59	0.247	0.117	0.0407666	0.480614					Ol-melt V partitioning||	Kelley & Cottrell (2012)
Agrigan, Mariana	18.72	145.66			Ol-host inclusion		No	81	5.27	0.233	0.078	0.0156569	1.80905					Ol-melt V partitioning||	Kelley & Cottrell (2012)
Agrigan, Mariana	18.72	145.66			Ol-host inclusion		No	76	3.47	0.203	0.105	0.0162755	1.75559					Ol-melt V partitioning||	Kelley & Cottrell (2012)
Agrigan, Mariana	18.72	145.66			Ol-host inclusion		No	82.1	4.59	0.27	0.1577	0.028223	0.993489					Ol-melt V partitioning||	Kelley & Cottrell (2012)
Agrigan, Mariana	18.72	145.66			Ol-host inclusion		No	78.8	3.78	0.231	0.1047	0.0207576	1.41948					Ol-melt V partitioning||	Kelley & Cottrell (2012)
Agrigan, Mariana	18.72	145.66			Ol-host inclusion		No	78.2	4.05	0.226	0.1453	0.0187069	1.56331					Ol-melt V partitioning||	Kelley & Cottrell (2012)
Agrigan, Mariana	18.72	145.66			Ol-host inclusion		No	77.2	4.26	0.232	0.1007	0.0170137	1.69436					Ol-melt V partitioning||	Kelley & Cottrell (2012)
Agrigan, Mariana	18.72	145.66			Ol-host inclusion		No	80.7	5.24	0.243	0.1182	0.02	1.47091					Ol-melt V partitioning||	Kelley & Cottrell (2012)
Agrigan, Mariana	18.72	145.66			Ol-host inclusion		No	82.1	4.47	0.266	0.13	0.0139865	1.96461					Ol-melt V partitioning||	Kelley & Cottrell (2012)
Agrigan, Mariana	18.72	145.66			Ol-host inclusion		No	80.1	5.36	0.24	0.1517	0.0144554	1.91916					Ol-melt V partitioning||	Kelley & Cottrell (2012)
Agrigan, Mariana	18.72	145.66			Ol-host inclusion		No	79.8	3.97	0.252	0.101	0.0267245	1.06928					Ol-melt V partitioning||	Kelley & Cottrell (2012)
Agrigan, Mariana	18.72	145.66			Ol-host inclusion		No	79.2	4.57	0.246	0.0953	0.0249201	1.16629					Ol-melt V partitioning||	Kelley & Cottrell (2012)
Agrigan, Mariana	18.72	145.66			Ol-host inclusion		No	81.8	3.96	0.247	0.1089	0.0169504	1.69951					Ol-melt V partitioning||	Kelley & Cottrell (2012)
Agrigan, Mariana	18.72	145.66			Ol-host inclusion		No	81.4	4.5	0.272	0.0793	0.0188077	1.55589					Ol-melt V partitioning||	Kelley & Cottrell (2012)
Augustine, Aleutians	59.33	-153.43	59.33	59.33	Ol-host inclusion		No					0.0125481	2.11412	2.11412		2.11412	2.11412	Ol-melt V partitioning||	Kelley & Cottrell (2012)
Agrigan, Mariana	18.72	145.66	18.72	17.668	Ol-host inclusion	50~300	No	80.2757				0.0152866	1.84207	1.97225	0.239055	1.89958	1.86578	Ol-melt V partitioning||	Brounce. (2014); Humphreys et al. (2022)
Agrigan, Mariana	18.72	145.66			Ol-host inclusion		No	79.7457				0.0150574	1.86291					Ol-melt V partitioning||	Brounce. (2014); Humphreys et al. (2022)
Agrigan, Mariana	18.72	145.66			Ol-host inclusion		No	79.7457				0.0147184	1.8943					Ol-melt V partitioning||	Brounce. (2014); Humphreys et al. (2022)
Agrigan, Mariana	18.72	145.66			Ol-host inclusion		No	73.522				0.0125005	2.11935					Ol-melt V partitioning||	Brounce. (2014); Humphreys et al. (2022)
Agrigan, Mariana	18.72	145.66			Ol-host inclusion		No	80.1416				0.011819	2.19653					Ol-melt V partitioning||	Brounce. (2014); Humphreys et al. (2022)
Agrigan, Mariana	18.72	145.66			Ol-host inclusion		No	79.6347				0.016223	1.76005					Ol-melt V partitioning||	Brounce. (2014); Humphreys et al. (2022)
Agrigan, Mariana	18.72	145.66			Ol-host inclusion		No	81.9385				0.0179311	1.62183					Ol-melt V partitioning||	Brounce. (2014); Humphreys et al. (2022)
Sarigan, Mariana	16.63	145.81	16.63		Ol-host inclusion		No	85.5402				0.0126186	2.10639			2.11159		Ol-melt V partitioning||	Brounce. (2014); Humphreys et al. (2022)
Sarigan, Mariana	16.63	145.81			Ol-host inclusion		No	86.0372				0.0121956	2.15335					Ol-melt V partitioning||	Brounce. (2014); Humphreys et al. (2022)
Sarigan, Mariana	16.63	145.81			Ol-host inclusion		No	84.4615				0.0131239	2.05232					Ol-melt V partitioning||	Brounce. (2014); Humphreys et al. (2022)
Sarigan, Mariana	16.63	145.81			Ol-host inclusion		No	83.4841				0.011915	2.18539					Ol-melt V partitioning||	Brounce. (2014); Humphreys et al. (2022)
Sarigan, Mariana	16.63	145.81			Ol-host inclusion		No	85.0594				0.013675	1.99566					Ol-melt V partitioning||	Brounce. (2014); Humphreys et al. (2022)
Sarigan, Mariana	16.63	145.81			Ol-host inclusion		No	86.3708				0.0116072	2.22141					Ol-melt V partitioning||	Brounce. (2014); Humphreys et al. (2022)
Sarigan, Mariana	16.63	145.81			Ol-host inclusion		No	84.8335				0.0116783	2.21301					Ol-melt V partitioning||	Brounce. (2014); Humphreys et al. (2022)
Sarigan, Mariana	16.63	145.81			Ol-host inclusion		No	84.2371				0.0146209	1.90347					Ol-melt V partitioning||	Brounce. (2014); Humphreys et al. (2022)
Sarigan, Mariana	16.63	145.81			Ol-host inclusion		No	86.0483				0.0123751	2.13323					Ol-melt V partitioning||	Brounce. (2014); Humphreys et al. (2022)
Sarigan, Mariana	16.63	145.81			Ol-host inclusion		No	86.6667				0.0101111	2.41124					Ol-melt V partitioning||	Brounce. (2014); Humphreys et al. (2022)
Sarigan, Mariana	16.63	145.81			Ol-host inclusion		No	85.1969				0.0118087	2.19772					Ol-melt V partitioning||	Brounce. (2014); Humphreys et al. (2022)
Sarigan, Mariana	16.63	145.81			Ol-host inclusion		No	86.116				0.0120712	2.16746					Ol-melt V partitioning||	Brounce. (2014); Humphreys et al. (2022)
Sarigan, Mariana	16.63	145.81			Ol-host inclusion		No	86.5058				0.0121514	2.15834					Ol-melt V partitioning||	Brounce. (2014); Humphreys et al. (2022)
Sarigan, Mariana	16.63	145.81			Ol-host inclusion		No	86.2624				0.0145548	1.90971					Ol-melt V partitioning||	Brounce. (2014); Humphreys et al. (2022)
Sarigan, Mariana	16.63	145.81			Ol-host inclusion		No	82.2054				0.0150331	1.86514					Ol-melt V partitioning||	Brounce. (2014); Humphreys et al. (2022)
Guguan, Mariana	17.3	145.83	17.3		Ol-host inclusion		No	84.9591				0.0154644	1.82612			1.82612		Ol-melt V partitioning||	Brounce. (2014); Humphreys et al. (2022)
Pagan, Mariana	18.11	145.8	18.11		Ol-host inclusion		No	84.4111				0.0179862	1.6176			1.6176		Ol-melt V partitioning||	Brounce. (2014); Humphreys et al. (2022)
Alamagan, Mariana	17.58	145.81	17.58		Ol-host inclusion		No	86.9128				0.0142594	1.93798			1.87401		Ol-melt V partitioning||	Brounce. (2014); Humphreys et al. (2022)
Alamagan, Mariana	17.58	145.81			Ol-host inclusion		No	84.2169				0.0208185	1.41542					Ol-melt V partitioning||	Brounce. (2014); Humphreys et al. (2022)
Alamagan, Mariana	17.58	145.81			Ol-host inclusion		No	85.1091				0.0198707	1.47988					Ol-melt V partitioning||	Brounce. (2014); Humphreys et al. (2022)
Alamagan, Mariana	17.58	145.81			Ol-host inclusion		No	84.3052				0.0110769	2.28576					Ol-melt V partitioning||	Brounce. (2014); Humphreys et al. (2022)
Alamagan, Mariana	17.58	145.81			Ol-host inclusion		No	84.2979				0.0177853	1.63311					Ol-melt V partitioning||	Brounce. (2014); Humphreys et al. (2022)
Alamagan, Mariana	17.58	145.81			Ol-host inclusion		No	87.1826				0.0121354	2.16016					Ol-melt V partitioning||	Brounce. (2014); Humphreys et al. (2022)
Alamagan, Mariana	17.58	145.81			Ol-host inclusion		No	84.6584				0.0119535	2.18095					Ol-melt V partitioning||	Brounce. (2014); Humphreys et al. (2022)
Alamagan, Mariana	17.58	145.81			Ol-host inclusion		No	87.074				0.0157025	1.80505					Ol-melt V partitioning||	Brounce. (2014); Humphreys et al. (2022)
Alamagan, Mariana	17.58	145.81			Ol-host inclusion		No	86.5067				0.0128505	2.08132					Ol-melt V partitioning||	Brounce. (2014); Humphreys et al. (2022)
Alamagan, Mariana	17.58	145.81			Ol-host inclusion		No	73.6971				0.0159104	1.7869					Ol-melt V partitioning||	Brounce. (2014); Humphreys et al. (2022)
Alamagan, Mariana	17.58	145.81			Ol-host inclusion		No	84.0307				0.015226	1.84755					Ol-melt V partitioning||	Brounce. (2014); Humphreys et al. (2022)
§Most of melt inclusions were not re-homogenisized because there is no daughter crystals found within the inclusion and no need for re-homogenisation.
Ave. Latitude (1) is average latitude of different volcanos in an arc segment. Ave. Latitude (2) is average values of Ave. Latitude (1) in an arc segment.
Ave. DFMQ (1) is average value of all measured/calculated DFMQ values in an arc segment. Ave. DFMQ (2) is average DFMQ of different volcanos in an arc segment. Ave. DFMQ (3) is average value of Ave. DFMQ (2) in an arc segment.
ΔNNO=ΔFMQ-0.7 is used during the recalculation (Jugo et al., 2005).
*The primary data are measured results and the data in bracket are those calculated to primary compositions or post-entrapment crystallization corrected values.
||The presented data are average values of recalculated results based on two differemt empirical equations (Canil. 2002; Shishkina et al., 2018).
References:
Brounce, M. N., Kelley, K. A. & Cottrell, E. Variations in Fe3+/∑Fe of Mariana Arc Basalts and Mantle Wedge fO2. Journal of Petrology 55, 2513–2536 (2014).
Brounce, M. N. A geochemical investigation of oxygen fugacity in the Marianas subduction factory. (University of Rhode Island, 2014).
Canil, D. Vanadium in peridotites, mantle redox and tectonic environments: Archean to present. Earth and Planetary Science Letters 195, 75–90 (2002).
Gaborieau, M. et al. Determination of Fe3+/ΣFe of olivine-hosted melt inclusions using Mössbauer and XANES spectroscopy. Chemical Geology 547, 119646 (2020).
Grondahl, C. & Zajacz, Z. Sulfur and chlorine budgets control the ore fertility of arc magmas. Nat Commun 13, 4218 (2022).
Gurenko, A. A., Belousov, A. B., Trumbull, R. B. & Sobolev, A. V. Explosive basaltic volcanism of the Chikurachki Volcano (Kurile arc, Russia): Insights on pre-eruptive magmatic conditions and volatile budget revealed from phenocryst-hosted melt inclusions and groundmass glasses. Journal of Volcanology and Geothermal Research 147, 203–232 (2005).
de Hoog, J. C. M., Taylor, B. E. & van Bergen, M. J. Sulfur isotope systematics of basaltic lavas from Indonesia: implications for the sulfur cycle in subduction zones. Earth and Planetary Science Letters 189, 237–252 (2001).
de Hoog, J. C. M., Hattori, K. H. & Hoblitt, R. P. Oxidized sulfur-rich mafic magma at Mount Pinatubo, Philippines. Contrib Mineral Petrol 146, 750–761 (2004).
Humphreys, J., Brounce, M. & Walowski, K. Diffusive equilibration of H2O and oxygen fugacity in natural olivine-hosted melt inclusions. Earth and Planetary Science Letters 584, 117409 (2022).
Ikehata, K., Yasuda, A. & Notsu, K. The geochemistry of volatile species in melt inclusions and sulfide minerals from Izu-Oshima volcano, Japan. Miner Petrol 99, 143–152 (2010).
Jugo, P. J., Luth, R. W. & Richards, J. P. Experimental data on the speciation of sulfur as a function of oxygen fugacity in basaltic melts. Geochimica et Cosmochimica Acta 69, 497–503 (2005).
Kelley, K. A. & Cottrell, E. Water and the Oxidation State of Subduction Zone Magmas. Science 325, 605–607 (2009).
Kelley, K. A. & Cottrell, E. The influence of magmatic differentiation on the oxidation state of Fe in a basaltic arc magma. Earth and Planetary Science Letters 329–330, 109–121 (2012).
Lloyd, A. S., Plank, T., Ruprecht, P., Hauri, E. H. & Rose, W. Volatile loss from melt inclusions in pyroclasts of differing sizes. Contrib Mineral Petrol 165, 129–153 (2013).
Muth, M. J. & Wallace, P. J. Slab-derived sulfate generates oxidized basaltic magmas in the southern Cascade arc (California, USA). Geology 49, 1177–1181 (2021).
Narvaez, D. F., Rose-Koga, E. F., Samaniego, P., Koga, K. T. & Hidalgo, S. Constraining magma sources using primitive olivine-hosted melt inclusions from Puñalica and Sangay volcanoes (Ecuador). Contrib Mineral Petrol 173, 80 (2018).
Nekrylov, N. et al. Chromium spinel in Late Quaternary volcanic rocks from Kamchatka: Implications for spatial compositional variability of subarc mantle and its oxidation state. Lithos 322, 212–224 (2018).
Rowe, M. C., Kent, A. J. R. & Nielsen, R. L. Determination of sulfur speciation and oxidation state of olivine hosted melt inclusions. Chemical Geology 236, 303–322 (2007).
Shishkina, T. A. et al. Experimental calibration and implications of olivine-melt vanadium oxybarometry for hydrous basaltic arc magmas. American Mineralogist 103, 369–383 (2018).
Tassara, S. et al. Post-melting oxidation of highly primitive basalts from the southern Andes. Geochimica et Cosmochimica Acta 273, 291–312 (2020).
Tobelko, D. P., Portnyagin, M. V., Krasheninnikov, S. P., Grib, E. N. & Plechov, P. Yu. Compositions and Formation Conditions of Primitive Magmas of the Karymsky Volcanic Center, Kamchatka: Evidence from Melt Inclusions and Trace-Element Thermobarometry. Petrology 27, 243–264 (2019).
Venugopal, S. et al. Two distinct mantle sources beneath the Garibaldi Volcanic Belt: Insight from olivine-hosted melt inclusions. Chemical Geology 532, 119346 (2020).
Vigouroux, N. et al. The sources of volatile and fluid-mobile elements in the Sunda arc: A melt inclusion study from Kawah Ijen and Tambora volcanoes, Indonesia. Geochemistry, Geophysics, Geosystems 13, (2012).
Zimmer, M. M. et al. The Role of Water in Generating the Calc-alkaline Trend: New Volatile Data for Aleutian Magmas and a New Tholeiitic Index. Journal of Petrology 51, 2411–2444 (2010).
