# Supplementary material for: Latitude-dependent oxygen fugacity in arc magmas
Source: Nat Commun. 2024 Jul 18;15:6050. doi: 10.1038/s41467-024-50337-6 (PMC11258285; doi:10.1038/s41467-024-50337-6)
Supplement: Supplementary file 5 — Supplementary Data 2 [file 41467_2024_50337_MOESM5_ESM.xlsx]

## Sheet: Shee1
Supplementary Table 2. Compiled slab's physical properties and geochemical data of Cenozoic primary basaltic rocks in different arc segments.
CITATIONS	ARC SEGMENT	LOCATION	LATITUDE MIN	LONGITUDE MIN	SAMPLE NAME	ROCK NAME	SLAB DIP (°)*	SLAB DEPTH (km)*	SIO2(WT%)	TIO2(WT%)	AL2O3(WT%)	FE2O3(WT%)	FEO(WT%)	FEOT(WT%)	CAO(WT%)	MGO(WT%)	MNO(WT%)	K2O(WT%)	NA2O(WT%)	P2O5(WT%)	LOI(WT%)	Mg#||	RITTMANN SERIAL INDEX†	TEMPERATURE (°C)‡	PRESSURE (GPa)‡	SCSS§	NBO/T¶	V/SC	CU/ZR	BA/NB	LA/YB	DY/YB	LI(PPM)	BE(PPM)	SC(PPM)	TI(PPM)	V(PPM)	CR(PPM)	CO(PPM)	NI(PPM)	CU(PPM)	ZN(PPM)	GA(PPM)	RB(PPM)	SR(PPM)	Y(PPM)	ZR(PPM)	NB(PPM)	CS(PPM)
[4450][20728]	CASCADES	CASCADES / HIGH CASCADES / CALIFORNIA / MEDICINE LAKE VOLCANO	41.5483	-121.235	s_1376M [4450]	THOLEIITE, OLIVINE [4450]	60.424	-202.814	47.9	0.8	18.2	1.83	7.29	8.93663	11.3	9.4	0.16	0.114	2.46	0.07		65.4378	1.35214	1247.36	1.37065	1548.41	1.12771	4.95098	2.18254	66.8182	1.21005	1.58447	4.2		40.8	4796	202	213	47.3	164	110	65		1.06	266	23	50.4	1.1	0.018
[4452]	CASCADES	CASCADES / COAST RANGES / OREGON	45.095	-121.997	s_RCBD-21 [4452]	THOLEIITE [4452]	62.1807	-341.309	47.88	0.94	18.25			9.12	11.43	9.63	0.16	0.09	2.39	0.09		65.5251	1.26033	1252.1	1.40971	1585.92	1.14463	5.12195	0.662162	26.9231					41	5635.3	210	276		150	49	61	17	2	252	23	74	2.6
[4450][20728]	CASCADES	CASCADES / HIGH CASCADES / CALIFORNIA / MEDICINE LAKE VOLCANO	41.785	-121.615	s_767M [4450]	THOLEIITE, OLIVINE [4450]	55.9043	-121.82	47.3	0.71	18	1.5	7.2	8.5497	11.8	10.4	0.15	0.062	2.38	0.08		68.6476	1.38683	1236.96	1.3563	1544.16	1.19176	5.13966	2.55474	81.9853	0.805825	1.52913	3.49		35.8	4256.45	184	225	50.1	207	105	63		0.72	217	19.9	41.1	0.544	0.022
[4450][20728]	CASCADES	CASCADES / HIGH CASCADES / CALIFORNIA / MEDICINE LAKE VOLCANO	41.9083	-121.643	s_1085M [4450]	THOLEIITE, OLIVINE [4450]	62.1807	-341.309	48	0.74	17.8	1.94	7.15	8.89561	11.9	10.3	0.16	0.085	2.43	0.08		67.5764	1.26505	1245.22	1.38197	1590.65	1.19998	5.18519	1.77033	60.7201	0.994975	1.58794	3.72		37.8	4436.3	196	227	50.7	185	74	60		0.86	210	20.5	41.8	0.611	0.024
[11187][17166]	CASCADES	CASCADES / HIGH CASCADES / OREGON / CAYUSE CRATER	44.52	-122.63	s_WF02 1 [11187]	BASALT, CALC-ALKALINE [11187]	62.1807	-341.309	49.09	1.588	15.91			9.78	9.44	10	0.179	0.39	2.91	0.436		64.7948	1.78818	1266.03	1.44612	1680.99	1.19903	5.19774	0.24359	22.1116	7.04453	2.11336			35.4	9520.06	184	349		235	38	86		2.3	701	27.49	156	10.04	0.07
[4450]	CASCADES	CASCADES / HIGH CASCADES / CALIFORNIA / MEDICINE LAKE VOLCANO	41.5	-121.632	s_880M [4450]	THOLEIITE, OLIVINE [4450]	62.1807	-341.309	47.9	0.63	18.3	1.24	7.31	8.42575	12.1	10.3	0.15	0.073	2.33	0.05		68.7539	1.17845	1230.39	1.2966	1508.91	1.17452	5.22989	2.31373	24.1667	0.726776	1.55738			34.8	3776.85	182	189	49.7	205	118	58			177	22	51	1.2	0.08
[6578]	CASCADES	CASCADES / HIGH CASCADES / CALIFORNIA / MEDICINE LAKE VOLCANO	41.33	-121.33	s_733M [6578]	BASALT, CALC-ALKALINE [6578]	19.6253	-61.6592	50.09	0.81	17.91			7.93	10.82	8.37	0.14	0.45	2.72	0.11	-0.27	65.5157	1.41733	1208.27	1.06838	1324.57	1.03507	5.24929	1.0022	35.7143	1.93774	1.44358	8.09	0.619	35.3	4855.95	185.3	124.6	39	111.3	91.2		13.9	13.2	222	24.3	91	3.36	0.81
[4450][20728]	CASCADES	CASCADES / HIGH CASCADES / CALIFORNIA / LASSEN VOLCANIC CENTER	40.3907	-121.305	s_LC82-970 [4450]	THOLEIITE, OLIVINE [4450]	58.9186	-169.317	48.4	0.96	17.4	1.68	7.76	9.27166	11.2	9.79	0.17	0.172	2.68	0.1		65.5247	1.50628	1255.68	1.43269	1622.85	1.18088	5.30233	1.62198	72.0161	1.50508	1.49831	6.3		43	5755.2	228	323	48.1	184	121	74		2.5	243	31	74.6	1.24	0.047
[2903][4712]	CASCADES	CASCADES / HIGH CASCADES / OREGON	43	-121.58	s_H9-111A [2903]	THOLEIITE [2903]	59.7507	-151.281	47.93	0.68	17.27	1.87	7.2	8.88263	11.59	10.29	0.16	0.09	2.25	0.06	0.59	67.5871	1.11067	1243.71	1.31307	1593.29	1.20108	5.33333	2.94595						42	4076.6	224	277		179	109			0.9	261	20	37	0
[4450][20728]	CASCADES	CASCADES / HIGH CASCADES / CALIFORNIA / MEDICINE LAKE VOLCANO	41.7867	-121.567	s_851M [4450]	THOLEIITE, OLIVINE [4450]	55.4928	-142.054	47.6	0.77	18.4	1.75	7.1	8.67465	11.7	9.91	0.16	0.094	2.47	0.1		67.2811	1.42915	1239.93	1.37691	1530.14	1.1553	5.37815	2.47216	64.3642	0.874396	1.57488	3.61		35.7	4616.15	192	201	48.6	176	111	65		0.96	243	21	44.9	0.637	0.014
[18114]	CASCADES	CASCADES / HIGH CASCADES / WASHINGTON / MOUNT RAINIER	46.3973	-121.728	s_00BL834 [18114]	BASALT [18114]	45.9564	-83.7626	50.23	1.35	16.58			8.51	9.69	8.61	0.15	1.3	3.12	0.46		64.5535	2.70213	1226.5	1.27719	1347.61	1.09598	5.40299	0.505682	27.5714	13.4906	2.21226			33.5	8093.25	181	287	42.8	158	89	78	18	22	751	23	176	14	0.31
[4450][4329][7037][6578][20728][8496][13184]	CASCADES	CASCADES / HIGH CASCADES / CALIFORNIA / MEDICINE LAKE VOLCANO	41.505	-121.644	s_82-72F [4450] / s_82-72-F [20728]	THOLEIITE, OLIVINE [4450] / BASALT, THOLEIITIC [4329] / BASALT [6578] / NOT GIVEN [8496]	59.4477	-231.667	47.6	0.59	18.5	2.06	6.33	8.2	12	10.5	0.15	0.07	2.19	0.06	-0.23	69.7417	1.11035	1225.95	1.27126	1473.69	1.16668	5.41667	4.00313	33.8141	0.735294	1.56471	2.52	0.209	40.8	3537.05	221	163.6	45.9	221.9	127.7	53	12.65	1.37	163	16.3	31.9	0.624	0.074
[18114]	CASCADES	CASCADES / HIGH CASCADES / WASHINGTON / MOUNT RAINIER	46.3392	-121.741	s_00ECR836 [18114]	BASALT [18114]	46.7128	-86.5282	49.88	1.3	16.66			8.58	9.95	8.75	0.15	1.23	3.05	0.44		64.7349	2.66256	1230	1.30863	1374.15	1.11116	5.44669	0.410405	35.3636	13.0317	2.181			34.7	7793.5	189	287	43.1	153	71	74	17	22	793	23	173	11	0.17
[4450][20728]	CASCADES	CASCADES / HIGH CASCADES / CALIFORNIA / LASSEN VOLCANIC CENTER	40.4222	-121.985	s_LC86-1046 [4450]	THOLEIITE, OLIVINE [4450]	44.6682	-84.1033	48.2	0.8	17.4	1.81	7.46	9.08864	11.4	10.1	0.17	0.138	2.55	0.09		66.67	1.38949	1250.33	1.39531	1606.43	1.19446	5.45	1.64894	82.0588	1.08214	1.41071	5.4		40	4796	218	229	46.1	190	93	70		1.54	260	27	56.4	1.02	0.05
[19253]	CASCADES	CASCADES / ANCESTRAL CASCADES / SIERRA NEVADA	39.2	-120.667	s_TOWLE #1 [19253]	BASALT [19253]	51.2231	-246.453	48.93	0.656	15.19			8.52	10.04	11.97	0.156	0.511	2.22	0.15		71.6623	1.25773	1226.72	1.15934	1511.42	1.28325	5.5501		87.5862	4.75882	1.60412			40.72	3932.72	226	983	48	292		80		11	412	16	52	2.9	0.268
[24229]	CASCADES	CASCADES / ANCESTRAL CASCADES / CALIFORNIA	39.2	-120.667	s_TOWLE #1 [24229]	BASALT [24229]	51.2231	-246.453	48.93	0.656	15.19			8.52	10.04	11.97	0.156	0.511	2.22	0.15		71.6623	1.25773	1226.72	1.15934	1511.42	1.28325	5.5501		87.5862	4.75882	1.60412			40.72	3932.72	226	983	48	292		80		10.99	425.3	15.23	59	2.9	0.268
[4452]	CASCADES	CASCADES / COAST RANGES / OREGON	45.0945	-122	s_RCBD-41 [4452]	THOLEIITE [4452]	48.2963	-80.7243	48.49	1.05	17.59			8.98	11.35	9.57	0.16	0.14	2.57	0.1		65.733	1.33772	1246	1.35048	1582.63	1.1562	5.5641	0.756098	24.4444					39	6294.75	217	272		147	62	63	14	2	263	24	82	2.7
[7175][19246]	CASCADES	CASCADES / GARIBALDI VOLCANIC BELT / WASHINGTON / GLACIER PEAK	47.98	-121.15	s_DG-04 [7175]	BASALT [7175] / BASALT, CALC-ALKALINE [19246]	49.1331	-114.434	51.57	1.18	17.48			7.79	9.13	7.23	0.15	0.85	3.54	0.2		62.5553	2.24879	1202.24	1.04737	1220.77	0.955438	5.58096	0.340319	79.8388	6.27752	1.7687	8.47382	0.96	27.0817	7074.1	151.142	231.853	32.2976	81.8071	41.0715	69.6234	18.3993	11.7551	619.649	23.3475	120.685	3.17138	0.302988
[4790]	CASCADES	CASCADES / HIGH CASCADES / OREGON / THREE SISTERS	44.17	-121.5	s_PHA97058 [4790]	BASALT [4790]	63.715	-149.499	52.38	1.12	15.8			8.25	8.9	8.19	0.14	1.19	3.19	0.29		64.118	2.04525	1209.65	1.01899	1276.76	1.04081	5.63333	0.0508475	49.2958					30	6714.4	169	309		54	9	72	17	19	743	23	177	7.1
[4450][20728]	CASCADES	CASCADES / HIGH CASCADES / CALIFORNIA / LASSEN VOLCANIC CENTER	40.015	-121.963	s_LC88-1398 [4450]	ANDESITE, BASALTIC [4450] / BASALT, CALC-ALKALINE [20728]	40.4925	-81.5139	49.5	0.85	16.4	1.78	7.4	9.00164	10.5	10.3	0.17	0.403	2.41	0.11		67.3162	1.21738	1238.9	1.22787	1539.93	1.18771	5.64304	1.04222	159.043	3.07752	1.51938	7.7		38.1	5095.75	215	402	43.9	213	79	70		9.7	267	28	75.8	1.88	0.48
[19253]	CASCADES	CASCADES / ANCESTRAL CASCADES / SIERRA NEVADA	39.25	-120.792	s_TOWLE #2 [19253]	ANDESITE, BASALTIC [19253]	51.8368	-233.057	52.26	0.782	16.76			7.26	9.08	6.92	0.132	1.279	2.4	0.23	1.1	63.1771	1.46167	1182.79	0.781349	1087.24	0.911767	5.64687		81.0256	10.5868	1.90599			37.72	4688.09	213	222	27	57		85		12	887	19	90	3.9	0.463
[24229]	CASCADES	CASCADES / ANCESTRAL CASCADES / CALIFORNIA	39.25	-120.792	s_TOWLE #2 [24229]	ANDESITE, BASALTIC [24229]	51.8368	-233.057	52.26	0.782	16.76			7.26	9.08	6.92	0.132	1.279	2.4	0.23	1.1	63.1771	1.46167	1182.79	0.781349	1087.24	0.911767	5.64687		81.0256	10.5868	1.90599			37.72	4688.09	213	222	27	57		85		14.66	910.6	17.5	96.4	3.9	0.463
[4450][20728]	CASCADES	CASCADES / HIGH CASCADES / CALIFORNIA / LASSEN VOLCANIC CENTER	40.32	-122.066	s_LC88-1311 [4450]	THOLEIITE, OLIVINE [4450]	38.2533	-75.5578	48	0.81	18	2.35	6.63	8.74453	11.2	9.34	0.16	0.157	2.52	0.09		65.7836	1.43327	1240.51	1.32515	1518.92	1.12412	5.66085	1.61512	71.84	1.48699	1.44238	5		40.1	4855.95	227	235	45	180	94	71		1.52	272	28	58.2	1.25	0.062
[4452]	CASCADES	CASCADES / HIGH CASCADES / OREGON	44.5175	-121.631	s_RCGR-773 [4452]	BASALT, CALC-ALKALINE [4452]	62.0971	-134.908	49.62	1.59	15.6			10.24	9.31	9.64	0.18	0.47	2.95	0.4		62.8878	1.76683	1278.91	1.49045	1735.11	1.19684	5.66667	0.551724	22					33	9532.05	187	334		223	96	102	20	6	701	27	174	10
[4450][20728][2261]	CASCADES	CASCADES / HIGH CASCADES / CALIFORNIA / LASSEN VOLCANIC CENTER	40.3396	-122.051	s_LC88-1312 [4450]	ANDESITE, BASALTIC [4450] / BASALT, CALC-ALKALINE [20728] / NOT GIVEN [2261]	38.2533	-75.5578	50.8	0.73	16.6	1.22	6.48	7.57776	11	9.97	0.15	0.299	2.48	0.1		70.311	0.990108	1192.51	0.915294	1343.57	1.12624	5.69149	0.47976	60.1047	3.17727	1.45455	6.8		37.6	4376.35	214	501	38.5	85	32	70		6	561	22.7	66.7	1.91	0.23
[4790]	CASCADES	CASCADES / HIGH CASCADES / OREGON / THREE SISTERS	44.17	-121.5	s_PHA97059 [4790]	BASALT [4790]	63.715	-149.499	51.93	1.18	16.36			8.52	8.41	8.36	0.15	1.26	3.07	0.3		63.8493	2.09954	1217.59	1.08318	1274.16	1.02545	5.7	0.011236	44.6835					30	7074.1	171	332		64	2	82	19	21	711	23	178	7.9
[4452]	CASCADES	CASCADES / HIGH CASCADES / OREGON	44.516	-121.31	s_RCGR-236 [4452]	THOLEIITE [4452]	66.0939	-184.575	50.04	0.87	17.84			8.67	11.15	8.53	0.17	0.24	2.39	0.09		63.9111	0.982514	1229.51	1.13255	1457.26	1.06193	5.70025	1.49315	62.5	1.9661	1.31525			40.7	5215.65	232	279	43	140	109	70	13	5	270	25.8	73	2
[24229]	CASCADES	CASCADES / ANCESTRAL CASCADES / CALIFORNIA	39.6863	-120.495	s_04-LT-83 [24229]	ANDESITE, BASALTIC [24229]	52.8998	-262.886	49.28	0.656	14.97			8.66	9.28	12.08	0.154	0.908	2.33	0.15	0.3	71.5169	1.66953	1229.13	1.20478	1458.52	1.28073	5.76698		206.538	7.7093	1.65			34.16	3932.72	197	862	51	325		79		16.52	479.1	19.55	74.3	2.6	0.924
[7175][19246]	CASCADES	CASCADES / GARIBALDI VOLCANIC BELT / WASHINGTON / GLACIER PEAK	47.98	-121.15	s_DG-02-1 [7175]	BASALT [7175] / BASALT, CALC-ALKALINE [19246]	49.1331	-114.434	52.62	1.12	17.78			7.38	8.79	6.8	0.14	0.81	3.55	0.19		62.3853	1.97605	1186.33	0.910158	1132.39	0.89563	5.76899	0.36391	80.9218	6.91949	1.78773	9.40352	0.98	26.5344	6714.4	153.077	234.573	32.7355	80.8239	45.5116	71.4034	18.6591	9.97589	672.7	23.3341	125.063	3.30542	0.286253
[4452]	CASCADES	CASCADES / HIGH CASCADES / OREGON	44.512	-121.814	s_RMCNSR-1 [4452]	BASALT [4452]	57.5697	-107.409	51.51	0.81	15.26			8.28	10.87	10.42	0.15	0.39	2.2	0.13		69.3742	0.788261	1209.54	0.917665	1462.94	1.19025	5.76923	1.02439	29.6429					39	4855.95	225	405		99	84	72	17	6	398	14	82	5.6
[4450][20728]	CASCADES	CASCADES / HIGH CASCADES / CALIFORNIA / MEDICINE LAKE VOLCANO	41.5	-121.634	s_881M [4450]	THOLEIITE, OLIVINE [4450]	56.4842	-146.539	49	0.9	17.7	1.17	7.86	8.91277	11.4	8.63	0.16	0.333	2.78	0.11		63.5421	1.61513	1244.13	1.33658	1527.96	1.11258	5.77465	1.42163	37.0044	1.548	1.6	6.3		35.5	5395.5	205	158	43.9	123	117	76		8	212	25.7	82.3	2.27	0.46
[7175][19246]	CASCADES	CASCADES / GARIBALDI VOLCANIC BELT / WASHINGTON / GLACIER PEAK	47.98	-121.15	s_DG-03-1 [7175]	BASALT [7175] / BASALT, CALC-ALKALINE [19246]	49.1331	-114.434	50.49	1.16	17.29			7.84	9.66	7.94	0.15	0.96	3.44	0.2		64.5762	2.58478	1206.52	1.14695	1260.49	1.02254	5.79593	0.408549	81.4823	6.52036	1.79133	9.37201	0.94	26.8175	6954.2	155.433	232.102	31.9493	81.218	50.5313	78.0059	18.5328	15.4148	633.065	23.0178	123.685	3.24215	0.348211
[4790]	CASCADES	CASCADES / HIGH CASCADES / OREGON / THREE SISTERS	44.17	-121.5	s_PHA97061 [4790]	BASALT [4790]	63.715	-149.499	50.78	1.17	16.63			8.8	8.81	9.23	0.15	0.91	3.01	0.3		65.3734	1.97512	1229.04	1.1949	1374.38	1.08173	5.83871	0.0374332	54.1429					31	7014.15	181	356		58	7	74	16	6	787	24	187	7
[24229]	CASCADES	CASCADES / ANCESTRAL CASCADES / CALIFORNIA	39.281	-120.444	s_04-LT-103 [24229]	BASALT [24229]	52.6966	-275.743	51.26	0.672	14.34			8.13	9.83	10.61	0.144	0.927	2.35	0.17	0.7	70.141	1.30009	1206.22	0.938095	1381.95	1.20909	5.90923		120.357	7.62987	1.77208			32.83	4028.64	194	620	37	186		84		12.36	749.9	15.12	76	2.8	0.267
[13085]	CASCADES	CASCADES / HIGH CASCADES / OREGON	44.059	-121.713	s_CC-02-1 [13085]	BASALT, CALC-ALKALINE [13085]	58.0496	-120.178	51.94	1.05	16.53			7.85	9.15	8.62	0.15	0.65	3.13	0.22		66.4042	1.59826	1196.93	0.942567	1266.9	1.02706	5.91054		33.5832	5.44022	2.04891			31.3	6294.75	185	411		153				10.9	431	20.49	93	6.67	0.39
[9862][11187][17166]	CASCADES	CASCADES / HIGH CASCADES / OREGON / THREE SISTERS	44.06	-121.71	s_CC02-1 [9862]	BASALT, CALC-ALKALINE [9862]	58.0496	-120.178	51.94	1.05	16.53			7.85	9.15	8.62	0.15	0.65	3.13	0.22		66.4042	1.59826	1196.93	0.942567	1266.9	1.02706	5.91054		33.5832	5.44022	2.04891			31.3	6294.75	185	411		153				10.9	431	20.49	93	6.67	0.39
[22538]	CASCADES	CASCADES / HIGH CASCADES / WASHINGTON / MARBLE CREEK PLUTON	48.3	-121.1	s_96TP60 [22538]	NOT GIVEN [22538]	48.8467	-122.266	47.49	1.886	16.88			8.32	10.56	9.55	0.125	0.54	2.76	0.077		67.3853	2.42539	1231.33	1.36091	1502.91	1.16355	5.91304	0.0441176	60					46	11306.6	272	79		31	3	73		8	479	24	68	3.8
[7175][19246]	CASCADES	CASCADES / GARIBALDI VOLCANIC BELT / WASHINGTON / GLACIER PEAK	48.05	-121.16	s_WC01-5 [7175]	BASALT [7175] / THOLEIITE, OLIVINE [19246]	47.4991	-108.205	50.2	1.07	18.79			8.04	9.48	7.46	0.16	0.41	3.32	0.17		62.5489	1.93235	1213.15	1.13664	1275.13	0.943774	5.94897	0.395092	68.1024	2.63507	1.82842	6.10058		29.4871	6414.65	175.418	199.907	34.7963	69.1758	35.321	72.1551	18.4284	3.62086	549.578	23.2152	89.3995	1.36891	0.0844081
[4450][20728]	CASCADES	CASCADES / HIGH CASCADES / CALIFORNIA / MEDICINE LAKE VOLCANO	41.5105	-121.626	s_1161M [4450]	THOLEIITE, OLIVINE [4450]	56.4842	-146.539	52.7	0.92	16.7	1.34	6.9	8.10573	9.55	6.85	0.15	1.092	3.05	0.13		60.3355	1.76868	1208.37	0.968714	1236.37	0.961331	5.96875	0.829268	56.7633	2.82517	1.55944	11.2		32	5515.4	191	127	37.1	104	102	64		33	205	29	123	4.14	2.1
[13085]	CASCADES	CASCADES / HIGH CASCADES / OREGON	43.906	-121.159	s_AIC-02-1 [13085]	BASALT, CALC-ALKALINE [13085]	66.5794	-201.476	49.13	1.34	17.22			8.76	9.86	8.43	0.15	0.47	3.08	0.26		63.3993	2.05587	1238.26	1.29648	1469.25	1.07334	5.9816		22.9086	3.96035	1.98238			32.6	8033.3	195	226		156				6.5	400	24.55	104	7.77	0.19
[13085]	CASCADES	CASCADES / HIGH CASCADES / OREGON	43.583	-121.078	s_SIC-02-1 [13085]	BASALT, CALC-ALKALINE [13085]	66.1138	-223.84	49.81	1.26	17.19			8.82	9.84	8.69	0.16	0.48	3.03	0.19		63.9441	1.80912	1235.89	1.25657	1459.98	1.07794	6.02374		29.5585	3.31604	2.06132			33.7	7553.7	203	349		174				7.7	341	23.49	87	5.21	0.29
[4450][20728]	CASCADES	CASCADES / HIGH CASCADES / CALIFORNIA / MOUNT SHASTA	41.243	-122.023	s_75SH-270 [4450]	THOLEIITE, OLIVINE [4450]	46.1543	-103.731	49.4	1.01	17.4	1.21	8	9.08876	10.9	9.3	0.17	0.284	2.68	0.11		64.8115	1.3727	1244.94	1.3099	1548.1	1.13231	6.06061	0.403458	56.5072	1.792	1.688	6.8		36.3	6054.95	220	389	41.6	40	28	82		5.9	224	24.4	69.4	2.09	0.2
[4684][3613][10782]	CASCADES	CASCADES / HIGH CASCADES / CALIFORNIA / MOUNT SHASTA	41.3911	-122.025	s_85-51 [4684]	THOLEIITE, OLIVINE [4684] / BASALT [3613]	42.347	-106.859	48.51	1.04	17.27	1.3	7.96	7.96	10.75	9.17	0.18	0.21	2.55	0.11	0.52	67.4651	1.3825	1213.55	1.11461	1415.18	1.09844	6.06452	0.424658	43.9286	1.78195	1.59398	6.3		31	6234.8	188	361	60	52	31	62	17	3.5	228	23.7	73	2.8	0.1
[18114]	CASCADES	CASCADES / HIGH CASCADES / WASHINGTON / MOUNT RAINIER	46.6887	-121.467	s_00WP830 [18114]	BASALT [18114]	51.2814	-93.7731	50.92	1.28	16.8			9.42	9.62	7.85	0.16	0.57	3.15	0.23		60	1.74727	1252.1	1.28146	1516.38	1.05348	6.11465	0.412281	22.1918	4.76395	2.05579			31.4	7673.6	192	250	43.5	90	47	80	17	12	321	25	114	7.3	0.26
[4450][20728]	CASCADES	CASCADES / HIGH CASCADES / OREGON / MOUNT MAZAMA	43.456	-122.202	s_88C1540 [4450]	THOLEIITE, OLIVINE [4450]	39.9691	-83.4415	48.9	1.16	17.2	1.93	7.35	9.08661	10.9	9.05	0.16	0.333	2.97	0.19		64.193	1.84912	1249.16	1.39279	1572.35	1.14411	6.14754	0.915033	44.4043	2.5123	1.7459	5.9		36.6	6954.2	225	269	44.9	138	84	75		4.8	412	27	91.8	2.77	0.083
[13085]	CASCADES	CASCADES / HIGH CASCADES / OREGON	44.083	-121.064	s_ELK-02-1 [13085]	BASALT, CALC-ALKALINE [13085]	67.2546	-221.011	49.39	1.21	17.95			8.57	9.88	8.75	0.15	0.5	3.03	0.24		64.7615	1.95006	1229.56	1.27053	1401.68	1.05679	6.14815		39.5948	3.85646	2.02392			27	7253.95	166	310		174				6.5	369	23.24	99	5.43	0.2
[15956]	CASCADES	CASCADES / HIGH CASCADES / WASHINGTON / MOUNT BAKER	48.7163	-121.853	s_NM-PB2 [15956]	BASALT [15956]	39.5052	-86.3968	49.45	1.064	17.3			9.66	9.17	8.14	0.168	0.45	3.21	0.15		60.2665	2.07684	1265.34	1.42288	1546.4	1.05748	6.14841	0.315789	75.5474	3.81043	1.90047			28.3	6378.68	174	253		67	24	82	17	4.8	521	21.38	76	2.74	0.05
[15956]	CASCADES	CASCADES / HIGH CASCADES / WASHINGTON / MOUNT BAKER	48.7155	-121.852	s_NM-PB6 [15956]	BASALT [15956]	39.5052	-86.3968	50.05	1.041	17.1			9.39	9.21	8.38	0.165	0.44	3.23	0.155		61.6328	1.91048	1253.01	1.32688	1508.48	1.06227	6.16667	0.342466	78.4091	3.74074	1.86574			30	6240.79	185	257		69	25	82	18	5.6	499	21.26	73	2.64	0.05
[19246][18091][17710]	CASCADES	CASCADES / HIGH CASCADES / WASHINGTON / MOUNT BAKER	48.7151	-121.852	s_06-MB-82 [19246]	THOLEIITE, OLIVINE [19246] / BASALT [18091]	39.5052	-86.3968	50.05	1.04	17.57			9.31	9.25	8.13	0.158	0.42	3.23	0.15		61.1176	1.88972	1250.78	1.31969	1480.16	1.03518	6.19722	0.257888	77.721	3.86671	1.94219			29.6746	6234.8	183.9	250.9		70.8764	18	79.7	17	4.95207	502.267	20.3915	69.7978	2.55869	0.0510717
[4450][4449][20728]	CASCADES	CASCADES / HIGH CASCADES / OREGON / MOUNT MAZAMA	43.0458	-122.205	s_84C1143 [4450] / s_1143 [4449]	THOLEIITE, OLIVINE [4450]	34.7636	-95.7348	48.7	1.17	17	1.73	7.62	9.17665	11.1	9.18	0.17	0.255	2.91	0.17		64.2941	1.75741	1252.72	1.4084	1616.26	1.16528	6.25683	1.18963	35.9717	2.12712	1.77542	5.6		36.6	7014.15	229	311	44.7	149	101	80		3	376	26	84.9	2.83	0.054
[13085]	CASCADES	CASCADES / HIGH CASCADES / OREGON	43.804	-121.654	s_DB-04-2 [13085]	BASALT, CALC-ALKALINE [13085]	57.0665	-122.933	50.13	1.29	17.23			8.66	9.06	7.82	0.15	0.53	3.4	0.27		61.9106	2.16619	1231.99	1.21915	1398.72	1.01444	6.27517		29.0883	4.47085	2.04036			29.8	7733.55	187	263		161				7	402	24.68	117	6.91	0.23
[4790]	CASCADES	CASCADES / HIGH CASCADES / OREGON / THREE SISTERS	44.17	-121.5	s_PHA97057 [4790]	BASALT [4790]	63.715	-149.499	52.6	1.15	16.35			8.36	8.7	8.22	0.14	1.16	3.2	0.3		63.897	1.98017	1210.74	1.03078	1264.25	1.01958	6.27586	0.0340909	50.4348					29	6894.25	182	314		52	6	73	21	20	720	22	176	6.9
[4450][4449][20728]	CASCADES	CASCADES / HIGH CASCADES / OREGON / MOUNT MAZAMA	42.934	-122.421	s_82C894 [4450] / s_894 [4449]	THOLEIITE, OLIVINE [4450]	30.0246	-88.807	47.4	1.04	17.3	1.53	7.71	9.08669	11.3	9.51	0.16	0.083	2.83	0.1		65.3242	1.92854	1256.72	1.48152	1644.75	1.18556	6.30986	1.74129	38.5714	1.13527	1.78261	4.8		35.5	6234.8	224	249	47.5	174	105	72	19	0.36	317	24.6	60.3	1.12	0.0087
[13085]	CASCADES	CASCADES / HIGH CASCADES / OREGON	43.874	-121.218	s_LTB-02-1 [13085]	BASALT, CALC-ALKALINE [13085]	66.5794	-201.476	51.13	1.23	17.57			8.06	9.54	8.16	0.15	0.57	3.26	0.28		64.5683	1.80429	1207.81	1.0745	1300.05	1.00589	6.31229		32.3731	4.86	2.08			30.1	7373.85	190	204		149				7.2	453	22.32	95	7.29	0.23
[24229]	CASCADES	CASCADES / ANCESTRAL CASCADES / CALIFORNIA	39.5583	-119.703	s_04-LT-31 [24229]	ANDESITE, BASALTIC [24229]	55.7216	-357.601	52.65	0.746	16.35			7.93	9.33	6.92	0.164	0.794	3.05	0.16		61.1008	1.53123	1202.54	0.882554	1238.74	0.955594	6.31394		161.923	5.5731	1.69591			34.21	4472.27	216	236	32	89		89		10.03	500	16.41	71.9	2.6	0.167
[22162]	CASCADES	CASCADES / HIGH CASCADES / OREGON / NEWBERRY	43.698	-120.815	s_RC07-11 [22162]	THOLEIITE [22162]	66.2445	-276.943	49.5925	1.28409	17.0317			9.20604	10.828	8.27278	0.174462	0.380356	2.99775	0.232377		61.796	1.73101	1251.5	1.35143	1575.69	1.10784	6.32719	0.535378	28.2222	2.53282	1.89025			35.0234	7698.12	221.6	262.5		124.35	73.4	82.5	16.1	5.30859	205.203	32.4565	137.099	5.06775	0.130044
[4450][4449][20728]	CASCADES	CASCADES / HIGH CASCADES / OREGON / MOUNT MAZAMA	42.894	-122.247	s_81C621 [4450] / s_621 [4449]	THOLEIITE, OLIVINE [4450]	32.7669	-97.8785	47.5	1.08	17.4	4.57	5.61	9.72209	11.1	9.74	0.19	0.107	2.69	0.11	0.49	64.328	1.73849	1275	1.59429	1716.69	1.19912	6.35328	1.29542	71.1275	1.12987	1.76623	8		35.1	6474.6	223	294	48.7	196	82	72	18	1.59	338	24	63.3	0.949	0.057
[15956]	CASCADES	CASCADES / HIGH CASCADES / WASHINGTON / MOUNT BAKER	48.716	-121.851	s_NM-PB5 [15956]	BASALT [15956]	39.5052	-86.3968	49.91	1.063	16.93			9.15	9.19	8.16	0.166	0.45	3.16	0.16		61.6159	1.88598	1247.12	1.27155	1482.32	1.04951	6.37874	0.337662	72.6619	3.66667	1.86854			30.1	6372.68	192	235		65	26	79	18	5.4	491	21.2	77	2.78	0.06
[13085]	CASCADES	CASCADES / HIGH CASCADES / OREGON	44.361	-121.762	s_CM-02-2 [13085]	SHOSHONITE [13085]	57.1523	-107.63	50.27	1.11	16.44			7.48	9.77	9.06	0.14	1.64	2.95	0.39		68.5556	2.89795	1195.6	1.12931	1188.77	1.09612	6.38225		236.927	14.6131	2.27976			29.3	6654.45	187	305		185				6.4	1701	19.74	91	3.71	0.15
[13085]	CASCADES	CASCADES / CASCADIA FOREARC / OREGON	44.172	-122.106	s_FLR-03-1 [13085]	BASALT, THOLEIITIC [13085]	44.6265	-78.9501	49.08	1.51	16.94			9.57	9.83	9.03	0.18	0.4	3.07	0.33		62.9414	1.98041	1262.47	1.45993	1613.11	1.13164	6.41457		31.2585	4.59766	2.02344			35.7	9052.45	229	359		176				4.3	398	27.82	116	7.39	0.2
[11187][17166]	CASCADES	CASCADES / HIGH CASCADES / OREGON / FOLEY RIDGE	44.17	-122.11	s_FLR03 1 [11187] / s_FLR03-1 [17166]	BASALT [11187]	44.6265	-78.9501	49.08	1.51	16.94			9.57	9.83	9.03	0.175	0.4	3.07	0.332		62.9414	1.98041	1262.46	1.45956	1613.2	1.13164	6.41457		31.2585	4.59766	2.02344			35.7	9052.45	229	359		176				4.3	398	27.82	116	7.39	0.2
[4450][20728]	CASCADES	CASCADES / HIGH CASCADES / WASHINGTON / MOUNT ADAMS	46.3557	-121.711	s_MA-953 [4450]	BASALT [4450] / BASALT, CALC-ALKALINE [20728]	45.9564	-83.7626	49.5	1.36	15.6	2.41	6.4	8.56852	9.81	9.62	0.14	1.48	3.17	0.52		66.8971	3.32654	1231.78	1.37905	1400.25	1.19667	6.42857	0.491979	34.4156	20.2368	2.4	8.1		28	8153.2	180	347	41.3	211	92	84		21	898	24	187	15.4	0.2
[15956]	CASCADES	CASCADES / HIGH CASCADES / WASHINGTON / MOUNT BAKER	48.7151	-121.852	s_NM-PB8 [15956]	BASALT [15956]	39.5052	-86.3968	49.59	1.013	17.32			8.9	9.29	8.18	0.161	0.42	3.2	0.149		62.3264	1.98853	1240.64	1.26553	1444.24	1.03896	6.4311	0.361111	76.8939	3.73529	1.78431			28.3	6072.93	182	243		65	26	77	17	5.7	499	19.98	72	2.64	0.07
[13085]	CASCADES	CASCADES / HIGH CASCADES / OREGON	44.014	-121.699	s_BC-02-1 [13085]	BASALT, CALC-ALKALINE [13085]	57.4886	-120.588	50.85	1.34	17.18			8.21	9.33	8.03	0.16	0.62	3.38	0.28		63.7752	2.03822	1214.31	1.12021	1331.38	1.01647	6.44231		25.6506	4.77637	1.99578			31.2	8033.3	201	367		149				9.7	414	25.72	123	8.07	0.32
[22162]	CASCADES	CASCADES / HIGH CASCADES / OREGON / NEWBERRY	43.6599	-120.883	s_RC07-10 [22162]	THOLEIITE [22162]	66.3052	-258.678	48.7597	1.21823	17.5105			9.20816	11.0456	8.78169	0.171652	0.240466	2.8652	0.1988		63.1898	1.6746	1253.7	1.40695	1594.97	1.1265	6.44496	0.533471	38.8336	2.28306	1.86966			33.5611	7303.28	216.3	264.4		142.713	62	79.5	15.6	1.12344	195.501	29.8744	116.22	4.18854	0.012765
[22162]	CASCADES	CASCADES / HIGH CASCADES / OREGON / NEWBERRY	43.7247	-120.992	s_RC05-4 [22162]	BASALT, CALC-ALKALINE [22162]	66.363	-240.357	49.9947	0.901057	18.3778			7.14192	11.3638	8.16088	0.125894	0.805618	2.83095	0.297371		67.2862	1.89067	1187.22	1.04419	1204.73	1.02113	6.46649	0.910346	95.705	14.4868	2.29239			27.4492	5401.84	177.5	186.6		125.8	87.4	65.2	15.9	11.2968	947	16.1905	96.0074	5.16768	0.207689
[13085]	CASCADES	CASCADES / HIGH CASCADES / OREGON	43.931	-121.263	s_BB-03-1 [13085]	BASALT, CALC-ALKALINE [13085]	65.8883	-183.233	49.39	1.34	17.24			9.16	9.58	8.17	0.16	0.53	3.24	0.27		61.619	2.22424	1250.45	1.37169	1501.88	1.06549	6.46865		31.4711	3.38521	1.98833			30.3	8033.3	196	278		159				7.6	357	28.25	118	5.37	0.24
[24229]	CASCADES	CASCADES / ANCESTRAL CASCADES / CALIFORNIA	39.7698	-120.463	s_04-LT-87 [24229]	ANDESITE, BASALTIC [24229]	53.2802	-263.6	52.56	0.705	16.33			7.54	8.62	8.24	0.142	0.708	3.21	0.19	1.2	66.2972	1.60572	1186.19	0.837711	1185.73	0.98532	6.48827		162	6.44366	1.73803			27.28	4226.47	177	452	40	154		86		14.01	652.4	14.3	67.8	2.5	0.709
[7175][19246]	CASCADES	CASCADES / GARIBALDI VOLCANIC BELT / WASHINGTON / GLACIER PEAK	48	-121.12	s_IP01-2 [7175]	BASALT [7175] / BASALT, CALC-ALKALINE [19246]	49.1331	-114.434	50.37	1.2	16.79			7.75	8.82	8.99	0.14	0.85	3.82	0.4		67.6166	2.95915	1201.83	1.16146	1264.77	1.06585	6.50107	0.354235	51.5233	11.1458	1.85399	8.85766	1.17	23.6226	7194	153.572	332.596	38.035	187.509	48.3955	82.6597	16.8549	8.53962	1016.35	18.3662	136.62	5.98962	0.24309
[4790]	CASCADES	CASCADES / HIGH CASCADES / OREGON / THREE SISTERS	44.17	-121.5	s_PHA97060 [4790]	BASALT [4790]	63.715	-149.499	50.12	1.19	16.58			9.14	8.23	9.94	0.16	0.71	2.73	0.25		66.1882	1.66202	1238.36	1.21515	1430.65	1.1002	6.51852	0.0755814	35.7831					27	7134.05	176	392		94	13	83	21	15	598	25	172	8.3
[4452]	CASCADES	CASCADES / HIGH CASCADES / OREGON	44.3616	-121.761	s_RCT-TFJ1 [4452]	BASALT, CALC-ALKALINE [4452]	57.1523	-107.63	50.25	1.15	16.28			8.11	9.72	9.41	0.14	1.43	3.13	0.37		67.6222	2.86808	1213.08	1.23344	1293.85	1.135	6.53137	0.685315	167.955	12.2727	2.28409			27.1	6894.25	177	341	43	190	98	74	10	6.4	1575	20.3	143	4.4	0.12
[7175][19246]	CASCADES	CASCADES / GARIBALDI VOLCANIC BELT / WASHINGTON / GLACIER PEAK	48.05	-121.16	s_WC01-3 [7175]	BASALT [7175] / THOLEIITE, OLIVINE [19246]	47.4991	-108.205	49.79	1.1	17.93			8.36	9.94	7.63	0.17	0.44	3.53	0.17		62.1617	2.32119	1226.2	1.2492	1376.15	1.01168	6.54721	0.364183	73.5155	2.72037	1.71136	6.85075		29.0603	6594.5	190.264	185.121	35.56	65.7398	36.5985	79.1789		3.90166	550.839	21.5503	100.495	1.35004	0.10605
[13085]	CASCADES	CASCADES / HIGH CASCADES / OREGON	43.605	-121.378	s_BR-04-2 [13085]	BASALT, CALC-ALKALINE [13085]	64.2808	-170.999	51.73	1.25	16.91			8.22	9.04	7.09	0.15	0.84	3.27	0.22		60.8236	1.93495	1214.58	1.04287	1284.43	0.964043	6.6323		31.0087	4.36475	1.97131			29.1	7493.75	193	212		128				18	378	26.43	118	8.03	0.65
[15717]	CASCADES	CASCADES / HIGH CASCADES / OREGON / THREE SISTERS	44.1	-121.75	s_TS-627 [15717]	BASALT [15717]	19.6253	-61.6592	51.9	1.05	16.4			8.39	9.06	8.66	0.15	0.65	3.12	0.21		65.0096	1.59696	1213.02	1.02038	1337.99	1.04458	6.66667	0.626263	37.5					30	6294.75	200	447		155	62	76	16	12	451	19	99	6
[4450][2261][4943]	CASCADES	CASCADES / HIGH CASCADES / CALIFORNIA / LASSEN VOLCANIC CENTER	40.6679	-121.751	s_LC86-1005 [4450]	ANDESITE, BASALTIC [4450] / NOT GIVEN [2261] / BASALT, CALC-ALKALINE [4943]	54.8436	-110.944	51.3	0.52	15.7	1.7	6.36	7.88966	10.7	11.1	0.14	0.317	2.45	0.08		71.6909	0.922444	1197.82	0.91522	1395.96	1.19858	6.70588	1.16949	74.6667	2.5625	1.54167			34	3117.4	228	628	43.7	209	69	68		3.3	294	14	59	1.5	0.107
[15717]	CASCADES	CASCADES / HIGH CASCADES / OREGON / THREE SISTERS	44.1	-121.75	s_TS-772 [15717]	BASALT [15717]	58.0496	-120.178	51.49	1.22	17.52			8.3	9.45	7.3	0.15	0.59	3.32	0.25		61.2873	1.80072	1216.63	1.08115	1317.24	0.970552	6.72414	0.598361	29.625					29	7313.9	195	216		125	73	74	18	12	433	27	122	8
[15673][3657][4450][20728][2261]	CASCADES	CASCADES / HIGH CASCADES / CALIFORNIA / LASSEN VOLCANIC CENTER	40.539	-121.162	s_LC82-905 [15673]	BASALT [15673] / ANDESITE, BASALTIC [3657] / BASALT, CALC-ALKALINE [20728] / NOT GIVEN [2261]	58.5891	-185.965	50.36	0.99	17.73	1.87	6.74	8.43	9.79	8.43	0.16	0.65	3.02	0.25	0.43	64.2857	1.83001	1221.94	1.17541	1344.03	1.03339	6.7284	0.685185	35.8857	5.68317	1.71287	8.7		32.4	5935.05	218	340	41	149	74	81		9.9	439	24.2	108	8.75	0.25
[17450]	CASCADES	CASCADES / HIGH CASCADES / OREGON / MOUNT MAZAMA	42.898	-122.24	s_82C-814 [17450]	ANDESITE, BASALTIC [17450]	32.7669	-97.8785	52.8139	1.12455	17.0691	2.00813	5.12074	6.92766	9.73944	6.97826	0.120488	1.01913	3.63472	0.371505	0.31	64.4526	2.2069	1173.74	0.885634	1117.46	0.947486	6.7658	0.63125	59.8667	12.9412				26.9	6741.7	182	209	33.1	89	101	86	20	17	989	22	160	7.5	0.5
[3208][3406][4449]	CASCADES	CASCADES / HIGH CASCADES / OREGON / MOUNT MAZAMA	42.5447	-122.747	s_814 [3208]	ANDESITE, BASALTIC [3208] / ANDESITE [3406]	29.3142	-84.4009	52.8	0.62	16.17	2	5.1	6.19	6.3	6.98	0.13	1.38	3.18	0.09	0.31	66.9937	2.1218	1148.58	0.612836	893.182	0.828862	6.76692	0.632911	59.8649	11.6667				26.6	3716.9	180	206	32.7	89	100	85	20	17	989	22	158	7.4	0.5
[22162]	CASCADES	CASCADES / HIGH CASCADES / OREGON / NEWBERRY	43.9014	-121.275	s_RC05-6 [22162]	BASALT, CALC-ALKALINE [22162]	65.8883	-183.233	50.047	1.16636	16.0527			7.83452	10.8068	9.36982	0.139085	1.11175	2.97117	0.500829		68.2815	2.36557	1206.81	1.16291	1341.83	1.16115	6.80142	0.451836	96.7536	17.0175	2.41032			29.5085	6992.36	200.7	412.4		172.4	63	73.8	15.6	16.0203	1098	21.0001	139.431	7.70547	0.222324
[15717]	CASCADES	CASCADES / HIGH CASCADES / OREGON / THREE SISTERS	44.1	-121.75	s_TS-771 [15717]	BASALT [15717]	58.0496	-120.178	51.2	1.31	17.03			8.5	9.1	7.98	0.15	0.66	3.39	0.27		62.8237	2.0003	1221.91	1.13867	1355.09	1.01617	6.82759	0.538462	27.5					29	7853.45	198	281		159	70	77	17	12	434	26	130	8
[15717]	CASCADES	CASCADES / HIGH CASCADES / OREGON / THREE SISTERS	44.1	-121.75	s_TS-625 [15717]	BASALT [15717]	58.0496	-120.178	51.72	1.07	16.57			8.42	9.07	8.65	0.15	0.61	3.11	0.22		64.902	1.58697	1214.25	1.034	1343.19	1.04103	6.86207	0.643564	38.3333					29	6414.65	199	434		158	65	79	17	10	454	20	101	6
[22162]	CASCADES	CASCADES / HIGH CASCADES / OREGON / NEWBERRY	43.825	-121.533	s_RC06-6 [22162]	BASALT, CALC-ALKALINE [22162]	62.66	-150.81	51.2607	1.21686	16.965			8.5453	9.42444	8.23772	0.151651	0.715239	3.24148	0.241676		63.4398	1.8952	1222.61	1.14272	1363.94	1.03772	6.86848	0.564123	22.4322	4.68809	1.91756			29.4679	7295.08	202.4	325.6		145.6	67.6	75.4	16.8	13.0443	408.657	24.1098	119.832	9.26746	0.404605
[15717]	CASCADES	CASCADES / HIGH CASCADES / OREGON / THREE SISTERS	44.1	-121.75	s_TS-626 [15717]	BASALT [15717]	58.0496	-120.178	51.79	1.06	16.47			8.36	9.11	8.69	0.15	0.64	3.12	0.21		65.1696	1.60837	1212.38	1.02533	1336.73	1.04574	6.89655	0.656566	38.5					29	6354.7	200	445		157	65	77	18	11	454	20	99	6
[4458]	CASCADES	CASCADES / HIGH CASCADES / OREGON	44	-121	s_H852 [4458]	BASALT [4458]	66.9518	-239.17	49.31	1.33	16.99			9.67	10.05	8.65	0.17	0.45	2.9	0.25		61.6878	1.77853	1264.98	1.43341	1609.06	1.11479	6.9	0.609272	27.75	3.10345				30	7973.35	207	232	44	159	92	106		6	310	35	151	8	0.06
[22162]	CASCADES	CASCADES / HIGH CASCADES / OREGON / NEWBERRY	43.6367	-121.102	s_RC06-2 [22162]	BASALT, CALC-ALKALINE [22162]	66.1138	-223.84	50.6739	0.917378	18.5925			6.88897	10.4381	8.20304	0.12076	0.862843	2.99835	0.304179		68.1868	1.9428	1176.37	0.980339	1124.82	0.978582	6.90096	0.787695	70.5246	12.0767	2.17042			23.9967	5499.68	165.6	194.9		136.6	80.6	64.1	16.1	10.7865	925.619	15.6857	102.324	6.15227	0.236732
[15780]	CASCADES	CASCADES / HIGH CASCADES / OREGON / SAND MOUNTAIN GROUP	44.3978	-121.955	s_08-SM-01 [15780]	BASALT [15780]	50.4116	-85.7556	51.6045	1.32355	16.8588			8.01	9.5552	6.98519	0.141165	0.987157	3.27183	0.365428		61.085	2.10809	1209.47	1.05117	1268.68	0.977189	6.90203	0.357888	30.4876	8.63101	1.83545			27.05	7934.69	186.7	192.4	67.63	121.6	58.98	74.47		9.882	1002	23.6485	164.8	12.51	0.1995
[13085]	CASCADES	CASCADES / HIGH CASCADES / OREGON	43.592	-121.15	s_TB-02-1 [13085]	BASALT, CALC-ALKALINE [13085]	66.1138	-223.84	51.77	0.92	17			7.66	8.55	9.97	0.13	0.6	3.04	0.18		70.0851	1.51079	1188.86	0.932389	1220.03	1.04655	6.917		55.2204	5.5102	2.10204			25.3	5515.4	175	549		359				8.2	460	16.41	76	4.31	0.29
[15717]	CASCADES	CASCADES / HIGH CASCADES / OREGON / THREE SISTERS	44.1	-121.75	s_TS-773 [15717]	BASALT [15717]	58.0496	-120.178	51.39	1.28	17.27			8.33	9.23	7.68	0.15	0.65	3.36	0.27		62.3996	1.91658	1216.44	1.09704	1322.45	0.992066	6.93103	0.587302	25.2222					29	7673.6	201	248		145	74	74	18	12	438	27	126	9
[24229]	CASCADES	CASCADES / ANCESTRAL CASCADES / CALIFORNIA	39.4858	-120.047	s_04-LT-01 [24229]	ANDESITE, BASALTIC [24229]	55.8301	-321.173	52.86	0.735	17.02			7.56	8.64	7.48	0.137	0.798	3.17	0.17	0.4	64.0411	1.59686	1187.98	0.841992	1150.48	0.930941	6.9618		149	6.7619	1.81293			28.01	4406.32	195	314	37	172		85		12.06	640.2	14.99	76.9	3	0.69
[15717]	CASCADES	CASCADES / HIGH CASCADES / OREGON / THREE SISTERS	44.1	-121.75	s_TS-674 [15717]	BASALT [15717]	58.0496	-120.178	51.46	1.21	17.47			8.19	9.43	7.45	0.15	0.64	3.34	0.25		62.0833	1.87239	1212.96	1.07438	1300.52	0.97705	6.96552	0.61157	32.1429					29	7253.95	202	221		127	74	77	17	11	419	25	121	7
[4450][4449][20728]	CASCADES	CASCADES / HIGH CASCADES / OREGON / MOUNT MAZAMA	43.0353	-122.202	s_88C1530 [4450] / s_1530 [4449]	THOLEIITE, OLIVINE [4450] / BASALT, CALC-ALKALINE [4449]	34.7636	-95.7348	49.9	1.18	17.2	1.7	7.11	8.63966	10	8.43	0.15	0.522	3.32	0.28		63.7197	2.13927	1232.2	1.26979	1437.44	1.07481	7.0297	0.719298	51.1737	4.61842	1.77632	7.5		30.3	7074.1	213	263	39	123	82	73		6.3	568	24.9	114	4.26	0.095
[17450]	CASCADES	CASCADES / HIGH CASCADES / OREGON / MOUNT MAZAMA	42.9572	-122.196	s_81C-543 [17450]	ANDESITE, BASALTIC [17450]	34.7636	-95.7348	51.5258	1.25063	16.7084	2.53127	5.31266	7.59029	9.88494	7.63382	0.130065	0.90045	3.70185	0.42021	0.01	64.4169	2.48437	1197.01	1.06041	1254.64	1.02291	7.07407	0.526627	49.3056	14.1176				27	7497.5	191	245	34.3	101	89	87	25	14	1038	20	169	7.2	0.2
[15717]	CASCADES	CASCADES / HIGH CASCADES / OREGON / THREE SISTERS	44.1	-121.75	s_TS-673 [15717]	BASALT [15717]	58.0496	-120.178	51.02	1.3	17.24			8.38	9.17	8.06	0.16	0.65	3.34	0.27		63.3869	1.98505	1218.96	1.1345	1338.13	1.01279	7.14286	0.51145	31.7143					28	7793.5	200	292		159	67	78	17	11	427	25	131	7
[4684][3613]	CASCADES	CASCADES / HIGH CASCADES / CALIFORNIA / MOUNT SHASTA	41.544	-122.279	s_85-1A [4684]	ANDESITE, BASALTIC [4684]	30.4652	-90.9422	51.52	0.56	15.55	1.68	6.05	7.56166	9.92	10.58	0.16	0.38	2.64	0.1	0.57	71.5787	1.07047	1187.58	0.847143	1316.96	1.14778	7.14706	1.39583	65.2632	2.24528	1.49057			34	3357.2	243	384	58	220	67	57	15	6.9	291	16	48	1.9	0.32
[15780]	CASCADES	CASCADES / HIGH CASCADES / OREGON / PRE-MAZAMA GROUP	44.0371	-121.727	s_08-CYC-01 [15780]	BASALT [15780]	57.4886	-120.588	51.193	1.02972	16.4675			8.39	9.27255	8.76022	0.148547	0.61945	2.98205	0.207157		65.2709	1.58315	1215.76	1.04975	1356.51	1.05705	7.17209	0.577372	30.508	5.0192	1.71614			27.37	6173.18	196.3	453.2	42.71	155.1	58.43	71.21		10.25	439.4	18.25	101.2	6.949	0.3405
[19246][18091]	CASCADES	CASCADES / HIGH CASCADES / WASHINGTON / MOUNT BAKER	48.6366	-121.73	s_08-MB-122 [19246]	BASALT, CALC-ALKALINE [19246] / ANDESITE, BASALTIC [18091]	42.353	-93.1823	52.6234	1.27957	17.6355			7.88	8.32306	7.56974	0.14732	0.70389	3.78048	0.22788		63.3583	2.08965	1197.98	0.997759	1204.58	0.936839	7.19084	0.367511	57.7763	4.59289	1.90743			22.7095	7671.02	163.3	254.8		134.215	50	70.3	15	9.71665	492.601	24.2948	136.051	4.59801	0.247119
[15717]	CASCADES	CASCADES / HIGH CASCADES / OREGON / THREE SISTERS	44.1	-121.75	s_TS-642 [15717]	BASALT [15717]	58.0496	-120.178	51.66	1.37	16.93			8.64	9.02	7.38	0.16	0.68	3.43	0.33		60.5911	1.95059	1225.76	1.12334	1362.68	0.990056	7.21429	0.535433	34.25					28	8213.15	202	285		127	68	80	18	10	478	25	127	8
[15780]	CASCADES	CASCADES / HIGH CASCADES / OREGON / SAND MOUNTAIN GROUP	44.4377	-121.915	s_08-LL-01 [15780]	BASALT [15780]	54.0073	-96.0141	49.5622	1.36525	16.5821			8.84	9.33273	8.98566	0.150028	0.75414	3.12758	0.314058		64.6601	2.29615	1237.67	1.30227	1450.45	1.10637	7.22161	0.427965	27.2034	6.61792	1.84009			27.03	8184.69	195.2	356.5	90.89	206.3	58.46	74.25		8.761	648.5	22.7475	136.6	10.62	0.1825
[22162]	CASCADES	CASCADES / HIGH CASCADES / OREGON / NEWBERRY	43.479	-121.414	s_RC07-9 [22162]	THOLEIITE [22162]	64.2074	-173.359	48.507	1.37195	17.3389			9.13489	9.71507	10.0875	0.163142	0.354055	3.10946	0.218076		66.5295	2.17829	1249.49	1.45658	1547.27	1.15914	7.25422	0.53803	29.1983	3.01607	2.03633			25.5438	8224.82	185.3	447.7		223.281	66.5	72.8	14.9	3.63206	342.36	25.5008	123.599	4.20327	0.118665
[4450][20728]	CASCADES	CASCADES / HIGH CASCADES / CALIFORNIA / MOUNT SHASTA	41.2616	-122.219	s_75SH-317 [4450]	ANDESITE, BASALTIC [4450] / BASALT, CALC-ALKALINE [20728]	37.0809	-91.601	52.9	0.56	16.8	2.15	5.2	7.13457	9.62	8.94	0.13	0.468	3.06	0.11		69.2827	1.25725	1172.9	0.778685	1173.77	1.01223	7.27941	1.28205	94.1935	3.48462	1.71538	7.1		27.2	3357.2	198	476	35.6	166	65	78		6.5	355	12.8	50.7	1.55	0.14
[19899]	CASCADES	CASCADES / HIGH CASCADES / OREGON / SNOW PEAK	44.6129	-122.556	s_AH-SP07-16 [19899]	THOLEIITE [19899]	22.5697	-46.5802	50.3435	1.28775	16.8438			9.36265	9.93191	8.41553	0.166859	0.398204	2.99819	0.251543		61.8016	1.57083	1250.52	1.28681	1549.97	1.08537	7.28173	0.739316	49.5833					32.3	7720.04	235.2	323.2		139.274	69.2	80.3	15.9	4	507.7	23.4	93.6	3.6
[19899]	CASCADES	CASCADES / HIGH CASCADES / OREGON / SNOW PEAK	44.6119	-122.563	s_AH-SP07-69 [19899]	THOLEIITE [19899]	22.5697	-46.5802	50.3316	1.31901	16.7104			9.53242	9.83453	8.41997	0.165513	0.4	3.0257	0.256017		61.389	1.60066	1255.7	1.31571	1577.45	1.09226	7.29179	0.7082	42.0698					32.9	7907.49	239.9	326.9		142.753	66.5	82.3	17.2	4.2	501.9	24.3	93.9	4.3
[15717]	CASCADES	CASCADES / HIGH CASCADES / OREGON / THREE SISTERS	44.1	-121.75	s_TS-672 [15717]	BASALT [15717]	58.0496	-120.178	50.75	1.36	17.52			8.64	9.07	7.93	0.15	0.61	3.31	0.26		62.2938	1.98276	1227.38	1.18587	1366.53	1.00357	7.30769	0.523438	23.8889					26	8153.2	190	269		155	67	78	17	10	450	24	128	9
[19899]	CASCADES	CASCADES / HIGH CASCADES / OREGON / SNOW PEAK	44.6095	-122.562	s_AH-SP07-53 [19899]	THOLEIITE [19899]	22.5697	-46.5802	49.686	1.36698	17.0603			9.6508	9.98732	8.53964	0.173721	0.277545	2.98603	0.271671		61.431	1.59302	1262.51	1.3882	1616.86	1.09923	7.32024	0.708911	43.9524					33.1	8195.02	242.3	311.2		141.142	71.6	84.1	16	2.6	524.5	26	101	4.2
[19253]	CASCADES	CASCADES / ANCESTRAL CASCADES / SIERRA NEVADA	39.2885	-120.321	s_01-LT-39 [19253]	BASALT [19253]	54.0428	-287.181	50.25	0.741	13.84			7.98	10.552	8.604	0.1666	1.279	2.199	0.232	2.4	65.9951	1.66848	1211.01	0.951062	1373.54	1.16779	7.35721		197.326	16.2848	1.89873			30.99	4442.3	228	397	34	47		75		17.2	965.8	17.5	96.6	3.74	0.6
[22162]	CASCADES	CASCADES / HIGH CASCADES / OREGON / NEWBERRY	43.8728	-121.205	s_RC05-7 [22162]	BASALT, CALC-ALKALINE [22162]	66.5794	-201.476	51.1875	1.26119	17.6398			8.39877	9.67444	7.43221	0.150087	0.607701	3.36215	0.286192		61.4324	1.92485	1221.11	1.14256	1341.82	0.988112	7.36261	0.771906	34.2673	4.86501	2.08806			27.5174	7560.85	202.6	177.9		123.7	76.5	76.4	17.4	7.67536	485	22.5093	99.1054	7.3006	0.26231
[18114]	CASCADES	CASCADES / HIGH CASCADES / WASHINGTON / MOUNT RAINIER	46.6876	-121.541	s_00OHS831 [18114]	BASALT [18114]	51.2814	-93.7731	50.7	1.45	16.09			9.01	8.84	9.3	0.15	1	3.03	0.44		65.0097	2.10921	1235.46	1.24234	1427.13	1.11347	7.36264	0.31	23.2432	9.42029	2.33816			27.3	8692.75	201	415	43.5	202	62	88	19	33	492	24	200	14.8	0.5
[19899]	CASCADES	CASCADES / HIGH CASCADES / OREGON / SNOW PEAK	44.659	-122.616	s_SNP4-2 [19899]	THOLEIITE [19899]	22.6048	-45.4106	50.3051	1.35063	16.4423			9.40804	9.65393	8.2639	0.1669	0.42263	3.01099	0.28043		61.2568	1.61391	1253.07	1.27833	1563.84	1.08409	7.41257	1.79132	37.6253	4.09045	1.96482			31.8407	8097.03	236.022	300.775		142.871	159.345	80.3576	19.2474	4.26231	513.828	24.8011	88.9536	4.81239	0.0554727
[4449]	CASCADES	CASCADES / HIGH CASCADES / OREGON / MOUNT MAZAMA	42.83	-121.92	s_1193 [4449]	ANDESITE, BASALTIC [4449]	46.431	-118.741	52.7	1.19	17	2.48	5.21	7.4415	9.52	6.86	0.12	0.97	3.69	0.32	0.35	62.3967	2.23872	1189.49	0.957049	1181.09	0.952513	7.42188	0.411392	79.2	10				25.6	7134.05	190	198	32.2	93	65	87	23	20	887	24	158	5
[15717]	CASCADES	CASCADES / HIGH CASCADES / OREGON / THREE SISTERS	44.1	-121.75	s_TS-769 [15717]	BASALT [15717]	58.0496	-120.178	51.1	1.21	17.74			8.28	9.09	7.88	0.14	0.56	3.38	0.22		63.141	1.91649	1214.94	1.10888	1306.6	0.982829	7.42308	0.617647	25.125					26	7253.95	193	251		160	63	74	18	9	480	22	102	8
[20985]	CASCADES	CASCADES / HIGH CASCADES / OREGON / BLUE ROCK	42.5724	-122.369	s_13-92 [20985]	BASALT [20985]	23.5807	-94.6947	48.75	1.12	16.99	1.84	8.03	9.68563	10.18	8.47	0.17	0.27	3.06	0.15	0.8	61.1512	1.9285	1269.62	1.47458	1644.56	1.11833	7.48276	1.42857	150					29	6714.4	217	257	46	131	100	67	17.6	5.5	395	27.8	70	0.9
[19899]	CASCADES	CASCADES / HIGH CASCADES / OREGON / SNOW PEAK	44.6114	-122.567	s_AH-SP07-65 [19899]	THOLEIITE [19899]	22.5697	-46.5802	50.247	1.30053	16.8519			9.56672	9.89853	8.29183	0.171721	0.40154	3.01514	0.255129		60.9394	1.61084	1258	1.33387	1579.45	1.08566	7.48726	0.773707	53.5					31.4	7796.68	235.1	320.1		143.537	71.8	81.7	15	4.2	504.6	23.1	92.8	3.4
[22538]	CASCADES	CASCADES / HIGH CASCADES / WASHINGTON / SLOAN CREEK PLUTON	47.959	-120.939	s_AKCP-1 [22538]	TONALITE [22538]	51.8452	-132.408	50.0576	1.14499	14.8372			9.2516	10.0636	10.8462	0.157456	0.796432	2.69895	0.145912		67.8481	1.73114	1245.25	1.29725	1590.12	1.2711	7.49501	0.62094	72.6472	3.26751	2.42126			35.6237	6864.21	267	589.8		148.5	39.1	85.8	16.9	14	564.8	16.4847	62.9691	4.4	0.517393
[22162]	CASCADES	CASCADES / HIGH CASCADES / OREGON / NEWBERRY	43.8282	-121.54	s_RC07-7B [22162]	BASALT, CALC-ALKALINE [22162]	62.66	-150.81	49.8958	1.2487	17.8981			8.17428	10.6761	8.07398	0.148107	0.54784	3.05387	0.283321		64.0018	1.88119	1217.94	1.18863	1366.95	1.03999	7.49849	0.594797	24.4585	5.34629	2.05068			26.1519	7485.95	196.1	207.9		123.964	69.3	71.1	16.2	6.81717	485.718	21.9225	116.51	8.39339	0.191949
[4452]	CASCADES	CASCADES / HIGH CASCADES / OREGON	44.4381	-121.838	s_RCW-85 [4452]	BASALT, CALC-ALKALINE [4452]	57.1523	-107.63	52.3	1.16	16.48			7.63	8.8	8.84	0.14	0.86	3.52	0.26		67.5898	2.06284	1189.14	0.966385	1217.75	1.034	7.53846	0.434109	24.1509	7.16578				26	6954.2	196	373	41.3	180	56	73	17	10	627	19	129	10.6
[19899]	CASCADES	CASCADES / HIGH CASCADES / OREGON / SNOW PEAK	44.6141	-122.545	s_AH-SP07-40 [19899]	THOLEIITE [19899]	27.5716	-50.1717	49.1627	1.40564	17.5059			10.1084	9.93247	8.52123	0.176635	0.138654	2.78427	0.264048	1.45	60.2759	1.38633	1277.78	1.47608	1684.97	1.09205	7.58504	0.776223	38.9672	3.95986	2.00955			32.8673	8426.82	249.3	329		149.75	74.4	88.4	17.4	0.847755	534.961	27.0654	95.8487	4.50532	0.0518929
[19899]	CASCADES	CASCADES / HIGH CASCADES / OREGON / SNOW PEAK	44.6115	-122.563	s_AH-SP07-61 [19899]	THOLEIITE [19899]	22.5697	-46.5802	50.2866	1.35319	16.6917			9.52011	9.75267	8.52786	0.166921	0.412652	3.02134	0.266975		61.7209	1.61835	1255.25	1.31801	1574.81	1.0955	7.58526	0.909046	39.7135	4.14722	2.0703			31.904	8112.36	242	325.7		148.145	87.3	84.2	18.8	4.85946	516.759	26.2223	96.0347	4.63649	0.117062
[7177][8496]	CASCADES	CASCADES / HIGH CASCADES / WASHINGTON	46.026	-122.422	s_L01-6 [7177]	BASALT, CALC-ALKALINE [7177] / NOT GIVEN [8496]	30.0834	-53.3171	49.64	1.14	17.04			8.74	9.87	9.43	0.15	0.82	2.95	0.22		66.0107	2.1405	1232.93	1.30242	1419.94	1.12252	7.65886			9.74874	2.23618			29.9	6834.3	229	364		131					849	20	130
[19899]	CASCADES	CASCADES / HIGH CASCADES / OREGON / SNOW PEAK	44.6377	-122.622	s_AH-SP07-12 [19899]	THOLEIITE [19899]	22.5697	-46.5802	50.2758	1.33622	16.6482			9.61525	9.53756	8.83934	0.168942	0.41255	2.89994	0.26626		62.3316	1.5081	1256.87	1.31405	1579.94	1.1028	7.68988	0.890306	40.2175	4.06824	2.03067			31.2489	8010.61	240.3	320.3		147.445	82.6	89.3	16.9	4.80734	474.147	24.7163	92.7771	4.54157	0.0818902
[19899]	CASCADES	CASCADES / HIGH CASCADES / OREGON / SNOW PEAK	44.6554	-122.574	s_AH-SP07-38 [19899]	THOLEIITE [19899]	22.6048	-45.4106	50.7566	1.37835	17.1283			9.17745	9.79923	7.76636	0.163054	0.458837	3.07783	0.294012		60.3684	1.61257	1244.99	1.23956	1494.4	1.03665	7.69183	0.768168	41.7148	4.77361	2.07725			30.6169	8263.22	235.5	224.6		93.7236	73.7	78.6	18.1	4.94168	558.845	24.1098	95.9426	5.08663	0.045103
[17450]	CASCADES	CASCADES / HIGH CASCADES / OREGON / MOUNT MAZAMA	42.968	-122.188	s_85C-1241 [17450]	ANDESITE, BASALTIC [17450]	34.7636	-95.7348	52.5603	1.20679	17.0547	2.5223	5.29565	7.56521	9.46485	6.80193	0.129655	0.964437	3.68022	0.319152	0.31	61.8086	2.25649	1193.84	0.980851	1194.96	0.950812	7.69231	0.442308	84.2222	9.82976				26	7234.73	200	192	32.5	88	69	93	22	13	890	21	156	4.5	0.6
[19899]	CASCADES	CASCADES / HIGH CASCADES / OREGON / SNOW PEAK	44.6378	-122.583	s_AH-SP06-10A [19899]	THOLEIITE [19899]	22.5697	-46.5802	50.7402	1.37769	16.7647			9.44575	9.682	8.19182	0.169211	0.437393	2.89599	0.295269		60.9535	1.43555	1251.28	1.24869	1542.54	1.06465	7.72066	0.695067	37.8323	4.42273	2.06759			30.671	8259.23	236.8	268.8		123.925	68.9	80.8	17.1	4.66286	520.092	25.4043	99.1272	5.1677	0.0663303
[3811]	CASCADES	CASCADES / HIGH CASCADES / OREGON / YELLOW ASTER COMPLEX	48.95	-121.17	s_102210B [3811]	BASALT [3811]	50.1116	-148.648	47.29	1.01	15.71			10.82	9.53	9.04	0.19	0.92	2.29	0.15	3.12	60.062	2.40189	1313.36	1.75865	1772.29	1.20702	7.73171				1.81053			41	6054.95	317	318		100				36	330	26	65
[19899]	CASCADES	CASCADES / HIGH CASCADES / OREGON / SNOW PEAK	44.6378	-122.583	s_AH-SP06-10B [19899]	THOLEIITE [19899]	22.5697	-46.5802	50.7418	1.37751	16.6856			9.32459	9.78498	8.14503	0.169215	0.45728	3.02951	0.284441		61.1243	1.57039	1248.67	1.25304	1534.39	1.06971	7.74473	0.634403	40.4985	4.23722	1.96928			31.0275	8258.15	240.3	264.6		127.908	61.4	79.6	16.8	5.20381	594.969	24.8448	96.7839	5.11422	0.145808
[22162]	CASCADES	CASCADES / HIGH CASCADES / OREGON / NEWBERRY	43.5908	-121.151	s_RC09-2 [22162]	BASALT, CALC-ALKALINE [22162]	65.8738	-205.795	52.4236	0.907063	16.8565			7.66979	8.48088	9.70267	0.127468	0.616493	3.03957	0.175974		69.4851	1.41843	1187.26	0.886429	1209.44	1.03002	7.76769	0.957846	58.0522	5.49679	2.02267			22.5163	5437.84	174.9	551		339.6	75.5	67.1	17.5	8.77119	471.77	16.0434	78.8227	4.17491	0.305175
[4458][4459]	CASCADES	CASCADES / HIGH CASCADES / OREGON	44	-121	s_EM89 [4458] / s_EM-89 [4459]	BASALT [4458]	66.9518	-239.17	50.1	1.41	17.1			9.9	9.53	8.59	0.17	0.37	3.3	0.14		60.9652	1.89703	1268.4	1.45666	1619.52	1.09877	7.77419	0.30719		3.21138				31	8452.95	241	305	45	178	47	79		3	165	27	153		0.11
[4450][20728]	CASCADES	CASCADES / HIGH CASCADES / OREGON / MOUNT MAZAMA	43.0775	-122.158	s_88C1557 [4450]	ANDESITE, BASALTIC [4450] / BASALT, CALC-ALKALINE [20728]	36.4983	-93.3251	52.1	1.12	17.3	1.96	6.09	7.85361	9.42	7.59	0.14	0.669	3.52	0.26		63.4981	1.92832	1200.36	1.00827	1251.67	0.978381	7.82946	0.564103	64.3204	5.36757	1.94595	7.7		25.8	6714.4	202	262	35.5	107	66	73		7.1	584	21.2	117	4.12	0.22
[20985]	CASCADES	CASCADES / HIGH CASCADES / OREGON / BLUE ROCK	42.6009	-122.315	s_14-24 [20985]	BASALT [20985]	23.8778	-98.1543	50.99	1.07	17.25	3.3	5.38	8.34934	9.02	7.09	0.16	0.47	3.26	0.25	1.21	60.4509	1.74129	1220.32	1.0586	1328.03	0.955239	7.89655	1.09901	101.053					29	6414.65	229	184	42	106	111	74	18.6	7	690	27.7	101	1.9
[22162]	CASCADES	CASCADES / HIGH CASCADES / OREGON / NEWBERRY	43.5973	-121.151	s_RC09-1 [22162]	BASALT, CALC-ALKALINE [22162]	65.8738	-205.795	52.0554	0.92217	16.5548			7.99423	8.34704	10.1627	0.131303	0.666768	2.99099	0.174561		69.5887	1.47748	1197.1	0.950298	1258.69	1.06772	7.93153	0.968218	54.0397	5.55146	2.07994			22.8329	5528.41	181.1	587.9		380.2	79	71.1	14.9	8.90976	454.894	16.262	81.5932	4.56677	0.317071
[4684][3613][10782][8496]	CASCADES	CASCADES / HIGH CASCADES / CALIFORNIA / MOUNT SHASTA	41.479	-122.189	s_82-94A [4684] / s_8294A [10782]	ANDESITE, BASALTIC [4684] / NOT GIVEN [8496]	32.2728	-95.7695	52.5	0.72	15.3	2.93	4.43	7.12	9.61	10.17	0.14	0.58	3.01	0.22	0.51	71.9972	1.35664	1172.02	0.785794	1231.1	1.11854	7.93333	0.590361	57.3333	8.16327	1.76871	7.3		30	4316.4	238	409	37	138	49	65	20	4.9	734	13.8	83	4.5	0.27
[22162]	CASCADES	CASCADES / HIGH CASCADES / OREGON / NEWBERRY	43.5151	-121.28	s_RC07-7 [22162]	BASALT, CALC-ALKALINE [22162]	65.1733	-190.381	49.9515	1.31948	17.4766			9.10314	9.43454	8.7151	0.158584	0.445294	3.1444	0.251404		63.2795	1.8537	1243.06	1.30627	1476.06	1.06566	7.93802	0.625918	34.862	3.92559	2.0689			25.3212	7910.3	201	314.1		191.289	62.3	81	15.7	5.75247	398.823	22.901	99.5338	5.18402	0.213579
[22162]	CASCADES	CASCADES / HIGH CASCADES / OREGON / NEWBERRY	43.651	-121.121	s_RC09-3B [22162]	BASALT, CALC-ALKALINE [22162]	67.0799	-220.281	50.5683	0.949469	18.6474			7.18654	10.2234	8.25076	0.121319	0.809014	2.92924	0.31449		67.3901	1.84646	1184.71	1.01054	1155.72	0.977884	7.96729	0.631127	69.9246	12.8746	2.23379			20.4084	5692.07	162.6	211.7		147.6	67.3	65.1	16.8	11.3447	886.881	16.4121	106.635	6.56739	0.259087
[22162]	CASCADES	CASCADES / HIGH CASCADES / OREGON / NEWBERRY	43.6157	-121.163	s_RC05-9 [22162]	BASALT, CALC-ALKALINE [22162]	65.8738	-205.795	51.9165	0.915333	17.2268			7.60388	8.74697	9.57886	0.129222	0.605589	3.109	0.167839		69.3957	1.5475	1188.33	0.93423	1209.38	1.02794	7.97622	1.01753	62.9269	5.4124	2.10243			22.9933	5487.42	183.4	552.2		330.1	74.2	70.2	16.1	8.21487	502	15.8151	72.9219	3.841	0.304274
[22162]	CASCADES	CASCADES / HIGH CASCADES / OREGON / NEWBERRY	43.4541	-121.294	s_RC07-8 [22162]	THOLEIITE [22162]	65.1733	-190.381	49.0746	1.51275	17.2776			9.61206	9.57734	8.93839	0.165247	0.415472	3.20324	0.223294		62.6007	2.1557	1263.36	1.48799	1592.88	1.11353	7.99769	0.661828	24.9829	3.07994	2.04839			27.0078	9068.96	216	309.6		188.572	74.2	82.9	17.6	5.36856	351.374	25.6668	112.114	5.62934	0.207907
[19899]	CASCADES	CASCADES / HIGH CASCADES / OREGON / SNOW PEAK	44.6313	-122.588	s_AH-SP06-3 [19899]	THOLEIITE [19899]	22.5697	-46.5802	50.7966	1.39464	16.7784			9.52271	9.33349	8.40421	0.168391	0.464875	2.83997	0.296626		61.3688	1.40086	1252.47	1.24682	1535.37	1.06249	8.00354	0.607653	38.0532	4.49233	2.07084			29.7243	8360.89	237.9	260		119.796	61	81.4	16.8	5.86306	524.917	25.7151	100.386	5.24352	0.0758623
[18114]	CASCADES	CASCADES / HIGH CASCADES / WASHINGTON / MOUNT RAINIER	46.1562	-122.915	s_08KS1011 [18114]	BASALT [18114]	11.4686	-40.0785	47.4	1.41	15.1			10.29	12.56	9.83	0.18	0.83	2.03	0.38		63.229	1.859	1297.87	1.72555	1897.02	1.35406	8.18182	1.17647	53.9286	13.9151	2.81132			37.4	8452.95	306	385	9.3	142	140	84	16	22	597	27	119	5.6	0.2
[22162]	CASCADES	CASCADES / HIGH CASCADES / OREGON / NEWBERRY	43.5834	-120.078	s_RC07-5 [22162]	BASALT, CALC-ALKALINE [22162]			49.9757	1.21404	17.3589			8.68784	9.87557	8.93685	0.158939	0.51284	3.10686	0.172483		64.9318	1.87828	1230.18	1.24888	1430.1	1.0828	8.20536	0.651009	31.6961	3.24656	2.02535			26.4827	7278.2	217.3	356.2		182.864	57.2	77.1	17.5	7.99574	357.785	22.0052	87.8636	4.78259	0.296166
[15673][3657][4450][20728][2261]	CASCADES	CASCADES / HIGH CASCADES / CALIFORNIA / LASSEN VOLCANIC CENTER	40.645	-121.166	s_LC85-671 [15673]	BASALT [15673] / ANDESITE, BASALTIC [3657] / BASALT, CALC-ALKALINE [20728] / NOT GIVEN [2261]	58.58	-189.06	51.35	1.19	17.02	1.88	6.76	8.45	9.14	8.05	0.15	1.02	3.14	0.3	0.34	63.1648	2.07253	1219.36	1.13082	1301.94	1.0177	8.24	0.546154	38.1905	6.53883	1.86893	8.8		25	7134.05	206	317	36.7	172	71	77		16.6	536	24.9	130	10.5	0.43
[4450][20728]	CASCADES	CASCADES / HIGH CASCADES / CALIFORNIA / LASSEN VOLCANIC CENTER	40.5313	-121.049	s_LC86-855 [4450]	ANDESITE, BASALTIC [4450] / BASALT, CALC-ALKALINE [20728]	57.36	-212.668	49.5	1.34	16.7	3.66	5.8	9.09327	9.79	8.19	0.15	0.83	3.25	0.28		61.8495	2.56098	1249.26	1.38835	1488.31	1.09453	8.25784	0.532258	44.431	5.8914	1.8914	10.1		28.7	8033.3	237	249	38.1	117	66	85		11.6	480	26	124	8.26	0.27
[4452]	CASCADES	CASCADES / HIGH CASCADES / OREGON	45.3178	-122.058	s_RC-ALDCK [4452]	BASALT, CALC-ALKALINE [4452]	44.5232	-71.977	50.49	1.46	15.21			9.13	9.63	8.68	0.15	1.6	3.21	0.44		63.1171	3.08893	1246.03	1.38721	1449.61	1.16583	8.29268	0.238095	77.1429	17.931				24.6	8752.7	204	268	42.6	164	45	92	16	20	1232	22	189	7.7
[19253]	CASCADES	CASCADES / ANCESTRAL CASCADES / SIERRA NEVADA	39.508	-120.172	s_01-LT-36 [19253]	ANDESITE, BASALTIC [19253]	54.2458	-296.612	52.88	0.685	16.69			7.29	9.424	7.238	0.1404	0.912	2.794	0.171	0.3	64.1212	1.39013	1181.15	0.775968	1134.2	0.938637	8.32396		160.326	7.52941	1.75163			26.67	4106.58	222	252	28	78		83		13.8	565.4	15.5	66.2	3.68	0.58
[4452]	CASCADES	CASCADES / HIGH CASCADES / OREGON	45.5095	-121.737	s_92TB16 [4452]	BASALT, CALC-ALKALINE [4452]	47.2095	-102.921	52.07	1.32	16.49			8.15	8.76	7.89	0.13	1.2	3.63	0.36		63.5379	2.57209	1209.24	1.10224	1255.68	1.01708	8.34043	0.446667	26.8462	18.1507				23.5	7913.4	196	327	46.8	200	67	81		12.6	996	17	150	13
[3755]	CASCADES	CASCADES / HIGH CASCADES / WASHINGTON / INDIAN HEAVEN	46.2	-121.5	s_DS42-81 [3755]	BASALT [3755]	54.3117	-108.004	52.66	1.13	16.04			7.36	8.49	8.41	0.12	1.74	3.62	0.43		67.286	2.97408	1183.64	1.00142	1110.04	1.02788	8.40796		71.2658	26.4667			20	20.1	6774.35	169	334	34.7	183		76		21.5	1058	14.7	184	7.9
[4684][3613][10782][8496]	CASCADES	CASCADES / HIGH CASCADES / CALIFORNIA / MOUNT SHASTA	41.559	-122.256	s_85-38 [4684]	THOLEIITE, OLIVINE [4684] / BASALT [3613] / THOLEIITE [10782] / NOT GIVEN [8496]	27.8658	-92.9379	49.14	0.87	16.95	0.84	7.86	7.86	10.61	9.6	0.18	0.3	2.11	0.11	0.61	68.7351	0.945945	1205.16	0.986835	1372.99	1.10091	8.5	0.580645	41.7857	1.94093	1.60338	6		26	5215.65	221	472	57	42	36	63	15	4.9	169	20.3	62	2.8	0.1
[19253]	CASCADES	CASCADES / ANCESTRAL CASCADES / SIERRA NEVADA	39.6003	-120.106	s_01-LT-33 [19253]	BASALT [19253]	54.3858	-308.441	49.82	0.734	16.82			7.97	11.062	7.755	0.1507	0.941	2.562	0.2	0.6	63.6554	1.79927	1214.17	1.09032	1324.61	1.05756	8.60104		154.007	10.5329	1.875			28.95	4400.33	249	253	31	80		82		9.3	710.8	15	64	2.87	0.68
[4452]	CASCADES	CASCADES / HIGH CASCADES / OREGON	44.3908	-121.54	s_RCDS-197 [4452]	BASALT, CALC-ALKALINE [4452]	63.9729	-150.642	51.38	1.42	16.79			7.45	9.51	8.19	0.13	1.13	3.57	0.44		66.4293	2.63604	1191.23	1.065	1209.63	1.03246	8.71795	0.22488	53.5922	24.5033				23.4	8512.9	204	256	39.9		47	80	17	21	924	21	209	10.3
[23517]	CASCADES	CASCADES / ANCESTRAL CASCADES / CALIFORNIA / BODIE HILLS VOLCANIC FIELD	38.1	-119.124	s_203434 [23517]	BASALT [23517]			49.9191	1.17637	15.0371			8.74413	9.14502	10.2293	0.163669	2.13793	2.69031	0.756971	2.12	67.8015	3.3692	1233.33	1.36605	1330.86	1.21947	8.75	0.202643	56.6667	17.2273	2.16364			24	7052.36	210	510	45.8	190	46	95	22	80.8	751	25.6	227	15	2.4
[20985]	CASCADES	CASCADES / HIGH CASCADES / OREGON / BLUE ROCK	42.5433	-122.366	s_14-15 [20985]	BASALT [20985]	21.8744	-95.6766	51.28	1.22	16.61	3.2	5.7	8.57936	8.27	7.29	0.16	0.88	3.8	0.49	0.76	60.4663	2.64522	1227.36	1.17373	1327.83	0.987151	8.95238	0.298013	99.1489					21	7313.9	188	235	37	124	45	80	20.6	11.2	843	29.8	151	4.7
[4449]	CASCADES	CASCADES / HIGH CASCADES / OREGON / MOUNT MAZAMA	42.83	-121.92	s_1210 [4449]	ANDESITE, BASALTIC [4449]	46.431	-118.741	52.4	1.07	18	2.68	5.64	8.05146	8.58	6.85	0.13	0.56	3.9	0.2		60.4961	2.11613	1206.97	1.03654	1229.93	0.909805	9.04977	0.558824	81.6667	4.15				22.1	6414.65	200	145	35.4	127	57	72	21	7	650	18	102	2.4	0.3
[4450][20728]	CASCADES	CASCADES / HIGH CASCADES / OREGON / MOUNT MAZAMA	42.999	-122.163	s_80C354 [4450]	ANDESITE, BASALTIC [4450] / BASALT, CALC-ALKALINE [20728]	34.7636	-95.7348	53	1.03	16.7	3.25	3.97	6.89435	8.52	7.21	0.11	1.216	3.7	0.42		65.3068	2.41671	1170.77	0.854126	1064.59	0.930737	9.07317	0.539683	71.8291	18.496	2.2	10.7		20.5	6174.85	186	290	33.2	161	68	84		13.9	1364	15.3	126	7.49	0.46
[23517]	CASCADES	CASCADES / ANCESTRAL CASCADES / CALIFORNIA / BODIE HILLS VOLCANIC FIELD	38.1461	-119.158	s_203452 [23517]	ANDESITE, BASALTIC [23517]			52.0213	1.15717	15.6678			8.1639	9.35975	8.47907	0.133125	1.60775	3.07213	0.337934	2.09	65.1506	2.42771	1208.77	1.08513	1255.35	1.0811	9.2963	0.840611	153	16.1333	2.35333			27	6937.22	251	310	39.1	121	77	83	18	37.3	766	16.6	91.6	6	1.8
[4450][20728]	CASCADES	CASCADES / HIGH CASCADES / OREGON / MOUNT MAZAMA	43.022	-122.193	s_88C1523 [4450]	ANDESITE, BASALTIC [4450] / BASALT, CALC-ALKALINE [20728]	34.7636	-95.7348	52.2	1.14	16	3.19	4.48	7.35036	8.94	8.23	0.12	1.122	3.79	0.52		66.837	2.62258	1185.12	0.978973	1184.95	1.03256	9.44186	0.291339	48.9899	21.6378	2.22835	10.6		21.5	6834.3	203	301	33	163	37	85		12.6	1271	15.5	127	9.9	0.19
[3657][4450][20728]	CASCADES	CASCADES / HIGH CASCADES / CALIFORNIA / LASSEN VOLCANIC CENTER	40.5347	-121.196	s_LM87-1384 [3657]	BASALT [3657] / ANDESITE, BASALTIC [4450] / BASALT, CALC-ALKALINE [20728]	58.5891	-185.965	49.64	1.32	15.6	3.24	6.63	8.28	9.81	10.7	0.15	0.92	3.03	0.46	0.21	69.9346	2.34977	1220.21	1.25225	1425.64	1.22074	9.46768	0.352113	36.8595	13.84	2.18	10.1		26.3	7913.4	249	451	40	152	50	91		17.2	643	19.4	142	12.1	0.3
[23517]	CASCADES	CASCADES / ANCESTRAL CASCADES / CALIFORNIA / BODIE HILLS VOLCANIC FIELD	38.0992	-119.138	s_203260 [23517]	BASALT [23517]			51.6615	1.08224	15.4168			8.20378	8.72937	9.41343	0.142937	1.58252	3.34881	0.418601	0.98	67.3779	2.80759	1209.85	1.14314	1264.54	1.12385	9.52381	0.349315	125.857	22.8667	2.43333			21	6488.01	200	530	41.6	198	51	90	20	34.9	968	17.9	146	7	0.9
[19253]	CASCADES	CASCADES / ANCESTRAL CASCADES / SIERRA NEVADA	39.4849	-120.04	s_01-LT-26 [19253]	BASALT [19253]	55.8301	-321.173	49.88	1.012	16.24			8.34	9.274	7.399	0.1578	1.048	2.644	0.235	0.9	61.4926	1.98123	1224.8	1.09192	1321.45	1.01201	9.61832		423.565	20.8098	2.04908			26.2	6066.94	252	279	29	71		100		14.6	1148	17.4	66.5	3.31	2.49
[19253]	CASCADES	CASCADES / ANCESTRAL CASCADES / SIERRA NEVADA	39.5195	-119.956	s_01-LT-41 [19253]	BASALT [19253]	55.8301	-321.173	49.12	0.958	16.46			8.07	9.041	8.327	0.1438	0.629	2.909	0.198	2.7	65.0022	2.04533	1216.54	1.09273	1335.26	1.04052	9.7561		165.861	6.96319	1.85276			24.6	5743.21	240	331	32	123		83		3.4	634.7	17.4	72.5	3.31	0.27
[4329][7037]	CASCADES	CASCADES / HIGH CASCADES / CALIFORNIA / MEDICINE LAKE VOLCANO	41.2053	-121.494	s_1020M [4329]	BASALT, THOLEIITIC [4329]	58.8303	-161.744	48	0.82	18.2			8.76	11.92	9.49	0.16	0.12	2.43	0.08	0.05	66.1017	1.3005	1242.21	1.35233	1549.41	1.14662			21.6667		1.68095				4915.9				170				1	196	21	74	3
[7037][4329]	CASCADES	CASCADES / HIGH CASCADES / CALIFORNIA / MEDICINE LAKE VOLCANO	41.3388	-121.572	s_1171M [7037]	BASALT, THOLEIITIC [7037]	57.3315	-148.398	52	0.97	17.2			7.85	9.35	7.63	0.14	1.04	2.97	0.18	0.16	63.6305	1.78668	1200.16	0.975163	1203.08	0.972082			22	3.44286				29.4	5815.15		156	38.8	134				26	236	30	132	9	1.7
[4457]	CASCADES	CASCADES / HIGH CASCADES / WASHINGTON / MOUNT ADAMS	46.206	-121.49	s_321 [4457]	BASALT [4457]	54.3117	-108.004	49.2	1.55	15.94			9.17	9.7	8.89	0.15	1.15	3.4	0.41		63.5706	3.33911	1253.26	1.4979	1512.84	1.16824		0.409357	22.1333						9292.25				157	70	53		19	981	21	171	15
[3657][2261][4943]	CASCADES	CASCADES / HIGH CASCADES / CALIFORNIA / LASSEN VOLCANIC CENTER	40.492	-121.508	s_LC88-1308 [3657]	ANDESITE, BASALTIC [3657] / NOT GIVEN [2261] / BASALT, CALC-ALKALINE [4943]	58.8505	-144.29	51.46	0.6	16.82	1.64	5.9	7.38	11.25	9.09	0.16	0.41	2.59	0.08	0.74	68.9158	1.06383	1186.36	0.869409	1287	1.07968			24.2						3597		444	38	166				6.2	462	22	69	5	0.35
[10630]	CASCADES	CASCADES / HIGH CASCADES / CALIFORNIA / MOUNT SHASTA	41.5	-121.5	s_1634 [10630]	BASALT [10630]	58.594	-159.634	48.31	0.89	18.76			9.02	10.89	9.13	0.16	0.13	2.61	0.1		64.5635	1.41386	1247.64	1.38308	1512.52	1.08618		0.878378	24.2						5335.55		185		136	65	65		9	354	29	74	5
[7037]	CASCADES	CASCADES / HIGH CASCADES / CALIFORNIA / MEDICINE LAKE VOLCANO	41.4733	-121.636	s_4B543 [7037]	BASALT, THOLEIITIC [7037]	56.4842	-146.539	52.7	0.96	17.1			7.69	9.22	7.47	0.14	1.15	3.03	0.16	0.05	63.6166	1.80128	1193.28	0.924446	1162.18	0.956592			24.3333	3.80952				22.7	5755.2		127	30	140				33	250	31	139	9	1.5
[5304]	CASCADES	CASCADES / HIGH CASCADES / CALIFORNIA / MEDICINE LAKE VOLCANO / BURNT LAVA FLOW	41.58	-121.58	s_659MA [5304]	ANDESITE [5304]	56.0849	-144.917	48.4	0.6	18.4			7.94	12	10.1	0.15	0.19	2.1	0.07		69.6018	0.97113	1213.72	1.14831	1408.9	1.13379			25	1.07143				38.8	3597		192	47.6	135				2	217	17	55	2	0.57
[4452]	CASCADES	CASCADES / HIGH CASCADES / OREGON	46.396	-121.715	s_DS91-65 [4452]	BASALT, CALC-ALKALINE [4452]	45.9564	-83.7626	50.4	1.3	16.49			8.4	9.74	8.52	0.14	1.26	3.31	0.42		64.6107	2.82228	1223.1	1.26449	1341.22	1.09621		0.326316	27.4286	12.0259					7793.5	205	355	42.7	156	62	79		22	723	23	190	14
[7037][4329]	CASCADES	CASCADES / HIGH CASCADES / CALIFORNIA / MEDICINE LAKE VOLCANO	41.5008	-121.634	s_82-58 [7037]	BASALT, THOLEIITIC [7037]	56.4842	-146.539	48.62	0.92	17.44			8.83	11.09	8.31	0.16	0.33	2.85	0.1		62.8804	1.79936	1244.96	1.33321	1524.84	1.09948			27.7419						5515.4	188	166		122				3	197	24	90	3.1
[7037][4329]	CASCADES	CASCADES / HIGH CASCADES / CALIFORNIA / MEDICINE LAKE VOLCANO	41.5067	-121.656	s_82-62 [7037]	BASALT, THOLEIITIC [7037]	53.4409	-134.652	48.89	0.94	17.7			9.02	11.27	8.54	0.17	0.3	2.56	0.11		63.0207	1.38873	1247.42	1.31798	1540.54	1.10061			27.7419						5635.3	201	175		132			15.7	3	196	23	90	3.1
[3657][4943]	CASCADES	CASCADES / HIGH CASCADES / CALIFORNIA / LASSEN VOLCANIC CENTER	40.492	-121.508	s_LB91-146 [3657]	BASALT [3657] / BASALT, CALC-ALKALINE [4943]	58.8505	-144.29	50.05	1.27	17.95	1.94	7	8.75	9.15	7.72	0.15	0.76	3.65	0.35	0.01	61.3618	2.7586	1236.16	1.33795	1367.86	1.00774			27.8	5.19313					7613.65		220	36	133				19	478	27	139	10	0.2
[4329][7037]	CASCADES	CASCADES / HIGH CASCADES / CALIFORNIA / MEDICINE LAKE VOLCANO	41.505	-121.644	s_904M [4329]	BASALT, THOLEIITIC [4329]	56.4842	-146.539	48.2	0.66	17.5			8.92	12.3	9.75	0.16	0.08	2.29	0.05	0.23	66.3015	1.08017	1245.74	1.32436	1612.2	1.19115			28	0.582011				40	3956.7		200	44.7	161				0	190	21	52	1	0.17
[4329][7037]	CASCADES	CASCADES / HIGH CASCADES / CALIFORNIA / MEDICINE LAKE VOLCANO	41.5025	-121.635	s_82-59 [4329]	BASALT, THOLEIITIC [4329]	56.4842	-146.539	49.4	0.96	17.6			8.88	11.15	8.58	0.18	0.33	2.77	0.15		63.4928	1.50156	1240.62	1.28669	1510.67	1.09897			29.0625						5755.2	189	172		138				9	197	22	91	3.2
[15661]	CASCADES	CASCADES / HIGH CASCADES / CALIFORNIA / MEDICINE LAKE VOLCANO	41.5387	-121.154	s_08MLV-25 [15661]	THOLEIITE, OLIVINE [15661]	60.424	-202.814	47.8	1.1	17.9			9.73	2.73	11.4	8.78	0.15	0.21	0		67.8347	0.027	1257.68	1.32015	1178.07	0.884246		1.26923	30.3333	1.95378				36.3	6594.5		165	47.5	119	99	62		0	291	20	78	3
[10631]	CASCADES	CASCADES / HIGH CASCADES / WASHINGTON	45.41	-122.74	s_813+73 [10631]	BASALT [10631]	17.4991	-39.8918	51.07	1.33	15.26			9.24	8.47	9.61	0.15	1.16	3.43	0.28		65.182	2.61067	1242.11	1.30768	1458.52	1.15971			30.3571						7973.35	187	336		235				15	929	15	133	11.2
[7037]	CASCADES	CASCADES / HIGH CASCADES / CALIFORNIA / MEDICINE LAKE VOLCANO	41.33	-121.33	s_1160M [7037]	GABBRO [7037]	59.4179	-189.91	49.3	0.46	19.3			6.96	10.5	9.43	0.12	0.53	2.36	0.08	0.45	70.92	1.32573	1179.31	0.975208	1142.65	1.0027			30.5	2.70807				24.9	2757.7		160	46.9	170				12	209	16	76	4	0.94
[4329][7037]	CASCADES	CASCADES / HIGH CASCADES / CALIFORNIA / MEDICINE LAKE VOLCANO	41.5103	-121.642	s_82-39 [4329]	BASALT, THOLEIITIC [4329]	56.4842	-146.539	49.2	0.94	17.8			8.92	11.1	8.54	0.15	0.35	2.9	0.13		63.2801	1.70363	1243.91	1.33917	1510.72	1.09705			30.8824						5635.3	200	173		140			16	6	200	24	97	3.4
[10630]	CASCADES	CASCADES / HIGH CASCADES / CALIFORNIA / MEDICINE LAKE VOLCANO	41.5	-121.5	s_1788M [10630]	BASALT [10630]	58.594	-159.634	50.39	0.89	18.48			7.81	10.6	8.23	0.15	0.43	2.83	0.18		65.4791	1.43811	1203.46	1.05786	1281.94	1.00148		0.913043	31.25						5335.55		220		110	84	54		9	390	20	92	8
[7037][4329]	CASCADES	CASCADES / HIGH CASCADES / CALIFORNIA / MEDICINE LAKE VOLCANO	41.47	-121.64	s_887M [7037]	BASALT, THOLEIITIC [7037]	56.4842	-146.539	49.8	0.98	17.9			8.29	10.3	8.62	0.15	0.62	2.89	0.16		65.1768	1.81178	1219.82	1.19181	1350.39	1.05181			31.4	2.81481				30.9	5875.1		180	43	139				14	259	23	113	5	0.8
[3613]	CASCADES	CASCADES / HIGH CASCADES / CALIFORNIA / MOUNT SHASTA	41.551	-122.281	s_85-35 [3613]	BASALT [3613]	27.8658	-92.9379	49.17	0.93	17.06			8.02	10.98	9.07	0.17	0.28	2.47	0.13		67.0582	1.22569	1213.34	1.07531	1415.05	1.10087			31.75						5575.35	202	473		39		65	12	6	209	24	61	4
[7037][4329]	CASCADES	CASCADES / HIGH CASCADES / CALIFORNIA / MEDICINE LAKE VOLCANO	41.5038	-121.503	s_82-54 [7037]	BASALT, THOLEIITIC [7037]	58.594	-159.634	48.62	0.93	17.53			8.93	11.09	8.54	0.19	0.32	2.82	0.15		63.2541	1.75438	1246.93	1.35596	1535.57	1.10912			32.069						5575.35	189	172		135				7	199	22	87	2.9
[7037][4329]	CASCADES	CASCADES / HIGH CASCADES / CALIFORNIA / MEDICINE LAKE VOLCANO / DOUBLE HOLE FLOW	41.4795	-121.615	s_1372M [7037]	BASALT, THOLEIITIC [7037]	56.4842	-146.539	50.2	1	17.5			8.91	10.13	7.64	0.16	0.68	2.74	0.17	0.71	60.6831	1.6245	1239.52	1.21701	1417.92	1.02239			32.2						5995		152		125				21	199	30	128	5
[3613]	CASCADES	CASCADES / HIGH CASCADES / CALIFORNIA / MOUNT SHASTA	41.4178	-122.068	s_85-53 [3613]	BASALT [3613]	38.1953	-99.8786	49.23	1.03	17.13			8.14	10.63	8.77	0.18	0.27	2.74	0.13		65.9784	1.45427	1217.17	1.11824	1420.26	1.08382			32.5						6174.85	208	422		29		73	14	6	227	25	61	4
[6764]	CASCADES	CASCADES / HIGH CASCADES / CALIFORNIA / MEDICINE LAKE VOLCANO	41.6208	-121.519	s_1544M [6764]	NOT GIVEN [6764]	58.6031	-157.887	52.3	0.61	19.4			6.6	9.34	7.66	0.11	0.75	2.91	0.13		67.628	1.44039	1160.18	0.795514	1002.49	0.868868			32.5714	6.54032					3656.95				168				30	484		91	7
[7037]	CASCADES	CASCADES / HIGH CASCADES / CALIFORNIA / MEDICINE LAKE VOLCANO	41.5108	-121.641	s_82-36 [7037]	BASALT, THOLEIITIC [7037]	56.4842	-146.539	49.17	0.91	17.54			8.76	10.97	8.4	0.17	0.32	2.66	0.11		63.3166	1.43929	1237.82	1.24309	1489.39	1.08165			32.6667						5455.45	204	180		129			16.4	8	200	22.9	90	3
[7037]	CASCADES	CASCADES / HIGH CASCADES / CALIFORNIA / MEDICINE LAKE VOLCANO	41.5083	-121.638	s_79-35D [7037]	BASALT, THOLEIITIC [7037]	56.4842	-146.539	47.77	0.65	18.07			8.31	11.89	9.76	0.16	0.09	2.27	0.05		67.8878	1.16763	1228.19	1.24383	1491.32	1.14624			33.0769						3896.75	185	179		157					179		48	1.3
[7037][4329]	CASCADES	CASCADES / HIGH CASCADES / CALIFORNIA / MEDICINE LAKE VOLCANO	41.4823	-121.696	s_1375M [7037]	BASALT, THOLEIITIC [7037]	53.4409	-134.652	52.5	0.86	17			8.03	9.81	7.29	0.14	0.97	2.83	0.12	0.18	62.0367	1.52	1204.91	0.94646	1237.16	0.971653			33.3333	2.73448				32	5155.7		123	39	108				30	205	29	120	6	1.8
[15717]	CASCADES	CASCADES / HIGH CASCADES / OREGON / THREE SISTERS	44.1	-121.75	s_TS-347 [15717]	BASALT [15717]	58.0496	-120.178	51.66	1.31	16.85			8.75	9.1	7.42	0.15	0.66	3.3	0.38		60.418	1.81081	1229.46	1.12225	1381.59	0.995203		0.425197	33.375						7853.45	188	286		115	54	72	16	9	497	22	127	8
[7037][4329]	CASCADES	CASCADES / HIGH CASCADES / CALIFORNIA / MEDICINE LAKE VOLCANO	41.5	-121.634	s_881M [7037]	BASALT, THOLEIITIC [7037]	56.4842	-146.539	49	0.9	17.7			8.91	11.4	8.63	0.16	0.33	2.65	0.11		63.5493	1.48007	1243.46	1.31255	1525.1	1.10831			34	1.60784				36.8	5395.5		170	45.5	135				6	199	24	85	3	0.53
[4790]	CASCADES	CASCADES / HIGH CASCADES / OREGON / THREE SISTERS	44.17	-121.5	s_96PRTS11 [4790]	BASALT [4790]	63.715	-149.499	52.51	1.25	15.34			8.01	7.65	9.07	0.13	1.43	3.21	0.36		67.0858	2.26389	1198.69	0.96761	1205.97	1.05082		0.22293	34.6154	14.4444	1.94444				7493.75	135	479	38	190	35	90	20	30.8	763	19.5	157	13	1.1
[4329][7037]	CASCADES	CASCADES / HIGH CASCADES / CALIFORNIA / MEDICINE LAKE VOLCANO	41.5023	-121.636	s_82-56 [4329]	BASALT, THOLEIITIC [4329]	56.4842	-146.539	48.9	0.99	17.8			9.02	11.25	8.7	0.19	0.28	2.73	0.15		63.4522	1.53561	1247.03	1.35175	1542.75	1.10927			34.8148						5935.05	184	170		140				3	201	24	93	2.7
[7037]	CASCADES	CASCADES / HIGH CASCADES / CALIFORNIA / MEDICINE LAKE VOLCANO	41.5105	-121.626	s_1161M [7037]	BASALT, ANDESITIC [7037]	56.4842	-146.539	52.7	0.92	16.7			8.11	9.55	6.85	0.15	1.09	2.95	0.13	0.34	60.3229	1.68264	1207.97	0.953598	1234.17	0.958341			35	2.90541				33.6	5515.4		137	39.2	105				29	192	24	120	6	2.06
[5304]	CASCADES	CASCADES / HIGH CASCADES / CALIFORNIA / MEDICINE LAKE VOLCANO / BURNT LAVA FLOW	41.58	-121.58	s_716MA [5304]	ANDESITE [5304]	56.0849	-144.917	48.6	0.67	17.9			7.79	11.7	9.44	0.14	0.32	1.99	0.08		68.5659	0.952875	1206.9	1.05141	1369.92	1.10157			36	1.40097				37	4016.65		163	43.8	126				7	201	18	71	2	0.53
[3657][4943]	CASCADES	CASCADES / HIGH CASCADES / CALIFORNIA / LASSEN VOLCANIC CENTER	40.492	-121.508	s_LB91-101 [3657]	ANDESITE, BASALTIC [3657] / BASALT, CALC-ALKALINE [4943]	58.8505	-144.29	51.48	1.14	18.03	1.76	6.34	7.93	9.13	7.22	0.14	0.97	3.44	0.35	0.01	62.1046	2.29341	1205.88	1.08931	1205.82	0.943621			36.1818	10.1111					6834.3		170	34	145				14	564	18	135	11	0.5
[7037][4329]	CASCADES	CASCADES / HIGH CASCADES / CALIFORNIA / MEDICINE LAKE VOLCANO	41.5048	-121.637	s_82-60 [7037]	BASALT, THOLEIITIC [7037]	56.4842	-146.539	49.14	0.91	17.73			8.86	11.08	8.45	0.17	0.29	2.64	0.1		63.1907	1.39819	1240.83	1.26878	1503.67	1.08371			36.2963						5455.45	201	180		126			15.7	4	205	21	89	2.7
[5304]	CASCADES	CASCADES / HIGH CASCADES / CALIFORNIA / MEDICINE LAKE VOLCANO / BURNT LAVA FLOW	41.58	-121.58	s_1156M [5304]	ANDESITE [5304]	56.0849	-144.917	49.4	0.64	18.4			7.77	11.8	8.97	0.15	0.28	2.55	0.08		67.5113	1.25139	1205.46	1.09344	1348.5	1.07462			36.5	1.75676				39.1	3836.8		181	43.9	100				7	246	18	71	2	0.38
[10631][22052]	CASCADES	CASCADES / HIGH CASCADES / WASHINGTON	46.06	-122.43	s_V348 [10631]	ANDESITE, BASALTIC [10631] / NOT GIVEN [22052]	27.6793	-52.96	52.97	0.92	16.21	2.85	5.18	7.74	8.83	9.18	0.13	0.62	3.21	0.19		68.1009	1.4713	1187.94	0.863754	1238.77	1.03864			36.6667						5515.4	188	393		178				11	593	17	115	5.4
[4329][7037]	CASCADES	CASCADES / HIGH CASCADES / CALIFORNIA / MEDICINE LAKE VOLCANO	41.5158	-121.641	s_82-66 [4329]	BASALT, CALC-ALKALINE [4329]	56.4842	-146.539	51.2	1.01	17.3			8.66	10.21	7.47	0.16	0.7	3.11	0.16		60.8251	1.77026	1229.01	1.16181	1382.84	1.01796			36.7391						6054.95	192	145		124			16	17	202	27	127	4.6
[4329][7037]	CASCADES	CASCADES / HIGH CASCADES / CALIFORNIA / MEDICINE LAKE VOLCANO	41.503	-121.649	s_82-61 [4329]	BASALT, THOLEIITIC [4329]	56.4842	-146.539	49.3	0.94	17.6			9.09	11.21	8.55	0.17	0.31	2.75	0.14		62.8676	1.48629	1248.33	1.33157	1546.66	1.10551			36.7857						5635.3	195	170		145			16.8	9	199	23	91	2.8
[7037]	CASCADES	CASCADES / HIGH CASCADES / CALIFORNIA / MEDICINE LAKE VOLCANO	41.517	-121.629	s_82-71 [7037]	BASALT, CALC-ALKALINE [7037]	56.4842	-146.539	50.39	0.99	17.39			8.72	10.23	7.71	0.16	0.61	2.98	0.17		61.4125	1.74399	1233.46	1.20056	1410.54	1.031			37.0732						5935.05	188	153		118			17.1	16.6	201	26.2	118	4.1
[3613]	CASCADES	CASCADES / HIGH CASCADES / CALIFORNIA / MOUNT SHASTA	41.4903	-122.303	s_82-81 [3613]	ANDESITE, BASALTIC [3613]	30.4652	-90.9422	52.05	0.61	16.77			7.52	9.56	9.84	0.14	0.39	3	0.11		70.1966	1.26985	1185.53	0.88097	1248.94	1.06775			37.25						3656.95	199	548		193		71	19	6	301	15	60	4
[7037][4329]	CASCADES	CASCADES / HIGH CASCADES / CALIFORNIA / MEDICINE LAKE VOLCANO	41.5093	-121.644	s_82-38 [7037]	BASALT, THOLEIITIC [7037]	56.4842	-146.539	49.25	0.92	17.68			8.91	11.06	8.46	0.17	0.33	2.55	0.11		63.0872	1.3271	1241.93	1.2614	1504.35	1.08325			37.4074						5515.4	197	175		134			16	6	203	25	88	2.7
[7037][4329]	CASCADES	CASCADES / HIGH CASCADES / CALIFORNIA / MEDICINE LAKE VOLCANO	41.5072	-121.628	s_83-8 [7037]	BASALT, CALC-ALKALINE [7037]	56.4842	-146.539	51.2	0.97	17.02			8.4	9.88	7.38	0.16	0.8	2.98	0.17		61.2618	1.74249	1220.96	1.08582	1331	1.00175			37.6596						5815.15	190	148		128			15.6	21	197	29	124	4.7
[4329][7037]	CASCADES	CASCADES / HIGH CASCADES / CALIFORNIA / MEDICINE LAKE VOLCANO	41.51	-121.635	s_83-24 [4329]	BASALT, CALC-ALKALINE [4329]	56.4842	-146.539	51.2	0.98	17.3			8.57	10.21	7.48	0.17	0.73	3.21	0.17		61.1056	1.89312	1227.16	1.16864	1370.07	1.01959			37.9545						5875.1	184	144		125			15.2	18	200	26	122	4.4
[4329][7037]	CASCADES	CASCADES / HIGH CASCADES / CALIFORNIA / MEDICINE LAKE VOLCANO	41.5083	-121.638	s_1004M [4329]	BASALT, THOLEIITIC [4329]	56.4842	-146.539	47.8	0.64	18.2			8.58	12.21	10.01	0.16	0.07	2.24	0.06		67.7419	1.11169	1236.45	1.31095	1539.32	1.17075			38	0.698925				36.2	3836.8		190	44.4	189				0	185	17	49	1	0.45
[7037][4329]	CASCADES	CASCADES / HIGH CASCADES / CALIFORNIA / MEDICINE LAKE VOLCANO	41.5005	-121.634	s_82-57 [7037]	BASALT, THOLEIITIC [7037]	56.4842	-146.539	48.43	0.9	17.52			8.95	11.17	8.56	0.15	0.28	2.73	0.11		63.2564	1.66853	1248.61	1.3542	1549.59	1.11212			38.8462						5395.5	189	173		133			16.5	4	196	23	85	2.6
[10630]	CASCADES	CASCADES / HIGH CASCADES / CALIFORNIA / MEDICINE LAKE VOLCANO	41.5	-121.5	s_840M [10630]	BASALT [10630]	58.594	-159.634	48.65	0.77	18.02			8.65	11.21	9.61	0.16	0.16	2.66	0.1		66.6641	1.4075	1234.67	1.29544	1495.63	1.13026		1.37681	39.5						4616.15		225		159	95	53		2	268	20	69	2
[3613]	CASCADES	CASCADES / HIGH CASCADES / CALIFORNIA / MOUNT SHASTA	41.4887	-122.301	s_85-5 [3613]	ANDESITE, BASALTIC [3613]	30.4652	-90.9422	51.74	0.6	16.2			7.88	9.57	10.68	0.15	0.33	2.73	0.11		70.9268	1.07135	1194.81	0.903846	1325.67	1.12768			40.6667						3597	194	675		239		70	13	5	291	15	40	3
[4329][7037]	CASCADES	CASCADES / HIGH CASCADES / CALIFORNIA / MEDICINE LAKE VOLCANO	41.5168	-121.628	s_83-5 [4329]	BASALT, CALC-ALKALINE [4329]	56.4842	-146.539	51.6	0.94	17.3			8.5	10.19	7.37	0.16	0.73	3.09	0.12		60.9483	1.69679	1222.93	1.10739	1347.56	1.00407			40.9091						5635.3	194	150		124			17.3	18	205	24	111	4.4
[3613]	CASCADES	CASCADES / HIGH CASCADES / CALIFORNIA / MOUNT SHASTA	41.477	-122.293	s_85-45 [3613]	ANDESITE, BASALTIC [3613]	30.4652	-90.9422	51.6	0.6	16.24			7.84	9.6	10.73	0.15	0.36	2.77	0.11		71.1276	1.13917	1194.86	0.922269	1322.19	1.13225			41						3597	201	695		235		69	14	4	286	15	39	3
[7037][4329]	CASCADES	CASCADES / HIGH CASCADES / CALIFORNIA / MEDICINE LAKE VOLCANO	41.503	-121.637	s_82-55 [7037]	BASALT, THOLEIITIC [7037]	56.4842	-146.539	48.93	0.9	17.63			8.79	11.05	8.49	0.17	0.32	2.66	0.1		63.4845	1.49754	1240.04	1.27546	1498.58	1.0894			41.25						5395.5	187	169		135				3	203	23	87	2.4
[4329][7037]	CASCADES	CASCADES / HIGH CASCADES / CALIFORNIA / MEDICINE LAKE VOLCANO	41.5152	-121.641	s_82-65 [4329]	BASALT, CALC-ALKALINE [4329]	56.4842	-146.539	50.7	0.98	17.4			8.73	10.48	7.79	0.16	0.59	3.02	0.15		61.6297	1.69248	1232.82	1.19929	1419.53	1.04063			42						5875.1	194	153		117			16.8	14	200	28	116	4
[3613]	CASCADES	CASCADES / HIGH CASCADES / CALIFORNIA / MOUNT SHASTA	41.5533	-122.219	s_85-40 [3613]	BASALT [3613]	29.3969	-97.2783	50.66	0.94	16.79			8.02	10.39	8.48	0.17	0.51	2.52	0.14		65.5557	1.19855	1207.41	0.97845	1344.59	1.051			42.5						5635.3	195	413		29		70	15	15	218	24	65	4
[15661]	CASCADES	CASCADES / HIGH CASCADES / CALIFORNIA / MEDICINE LAKE VOLCANO	41.7388	-121.525	s_08MLV-20 [15661]	THOLEIITE, OLIVINE [15661]	58.6325	-156.191	50.2	0.87	17.9			8.67	2.8	10.4	8.45	0.11	0.48	0.04		68.3461	0.0483472	1214.73	0.956667	1021.78	0.798121		0.804598	42.6667	1.76259				36.5	5215.65		159	39.9	140	70	60		9	265	22	87	3
[3613]	CASCADES	CASCADES / HIGH CASCADES / CALIFORNIA / MOUNT SHASTA	41.4728	-122.291	s_85-46 [3613]	ANDESITE, BASALTIC [3613]	30.4652	-90.9422	52.32	0.6	16.33			7.55	9.34	10.2	0.15	0.39	3.01	0.11		70.8607	1.24034	1184.16	0.857038	1256.58	1.08809			43						3597	180	679		216		71	17	5	324	14	38	3
[15673][3657]	CASCADES	CASCADES / HIGH CASCADES / CALIFORNIA / LASSEN VOLCANIC CENTER	40.5722	-121.184	s_LC86-834 [15673]	BASALT [15673]	58.58	-189.06	49.38	0.92	16.59	1.96	7.05	8.81	10.06	10.46	0.16	0.53	2.68	0.22	0.03	68.1236	1.61506	1233.64	1.26241	1484.17	1.18147			43.6667	6.33333					5515.4		397	42	203				14.6	409	19	100	6	0.5
[15661]	CASCADES	CASCADES / HIGH CASCADES / CALIFORNIA / MEDICINE LAKE VOLCANO	41.547	-121.693	s_08MLV-05 [15661]	THOLEIITE, OLIVINE [15661]	53.4409	-134.652	49.3	0.9	18.3			8.32	10.88	8.79	0.15	0.33	2.9	0.15		65.5372	1.65602	1223.23	1.23071	1400.15	1.06729		1.27907	43.75	2.56522				31	5395.5			43.9	90	110	60		2	404	19	86	4
[3613]	CASCADES	CASCADES / HIGH CASCADES / CALIFORNIA / MOUNT SHASTA	41.4008	-122.025	s_85-52 [3613]	BASALT [3613]	42.347	-106.859	48.52	1	16.98			8.1	10.61	9.24	0.18	0.22	2.46	0.12		67.2489	1.30116	1217.75	1.11166	1436.73	1.10713			44						5995	218	489		33		74	15	5	206	26	58	3
[3657]	CASCADES	CASCADES / HIGH CASCADES / CALIFORNIA / LASSEN VOLCANIC CENTER	40.492	-121.508	s_LC86-931 [3657]	ANDESITE, BASALTIC [3657]	58.8505	-144.29	52.07	0.84	16.79	1.65	5.92	7.4	9.62	8.85	0.13	0.84	3.09	0.2	0.1	68.2812	1.70286	1183.11	0.910359	1193.7	1.03418			44.1429						5035.8		482		165				15	405	17	98	7
[4329][7037]	CASCADES	CASCADES / HIGH CASCADES / CALIFORNIA / MEDICINE LAKE VOLCANO	41.5142	-121.629	s_83-3 [4329]	BASALT, CALC-ALKALINE [4329]	56.4842	-146.539	51.3	1.02	17.4			8.77	10.19	7.41	0.16	0.7	2.98	0.14		60.3311	1.63161	1232.04	1.15855	1388.84	1.00962			44.359						6114.9	182	137		116			16.4	16	207	24	126	3.9
[3657][4943]	CASCADES	CASCADES / HIGH CASCADES / CALIFORNIA / LASSEN VOLCANIC CENTER	40.3669	-122.021	s_LC88-1314 [3657]	ANDESITE, BASALTIC [3657] / BASALT, CALC-ALKALINE [4943]	44.6682	-84.1033	50.82	1.38	16.41	1.95	7.03	8.79	8.77	8.43	0.15	1.12	3.56	0.38	0.01	63.32	2.80082	1232.63	1.2822	1372.92	1.07212			44.8	6.47887					8273.1		283		143				25	559	27	172	10
[4790]	CASCADES	CASCADES / HIGH CASCADES / OREGON / THREE SISTERS	44.17	-121.5	s_96PRTS6 [4790]	BASALT [4790]	63.715	-149.499	50.56	1.09	15.55			8.42	8.33	9.57	0.14	1.02	2.82	0.28	0.51	67.1684	1.95048	1217.21	1.07627	1334.39	1.1029		0.2	45	11.6667	1.7619				6534.55	135	479	41.5	130	30	75	20	17.6	718	21.5	150	8	0.6
[3657][4943]	CASCADES	CASCADES / HIGH CASCADES / CALIFORNIA / LASSEN VOLCANIC CENTER	40.3432	-121.644	s_LM92-2443 [3657]	ANDESITE, BASALTIC [3657] / BASALT, CALC-ALKALINE [4943]	57.033	-125.828	51.2	1.13	17.3	1.86	6.68	8.36	8.97	8.15	0.16	0.85	3.38	0.32	0.07	63.6995	2.18206	1216.9	1.14125	1296.47	1.0109			45.5556	7.66667					6774.35		308	38.6	135				12	482	23	138	9	0.3
[10631]	CASCADES	CASCADES / HIGH CASCADES / WASHINGTON	45.4	-122.49	s_RC02-8 [10631]	BASALT [10631]	30.3508	-46.8711	51.5	1.2	16.79			7.16	9.38	8.49	0.13	1.16	3.81	0.38		68.0955	2.90599	1182.61	1.0517	1166.12	1.03981			45.7576						7194	185	314		187				4	1135	16	124	9.9
[4329][7037]	CASCADES	CASCADES / HIGH CASCADES / CALIFORNIA / MEDICINE LAKE VOLCANO	41.5067	-121.628	s_83-7 [4329]	BASALT, CALC-ALKALINE [4329]	56.4842	-146.539	52.2	0.97	17.1			8.3	9.93	7.19	0.17	0.87	3.05	0.16		60.9265	1.67026	1214.38	1.03155	1293.17	0.983506			46.25						5815.15	182	141		113			15.9	22	195	26	112	4
[10631]	CASCADES	CASCADES / HIGH CASCADES / WASHINGTON	45.4	-122.49	s_RC02-8B [10631]	BASALT [10631]	30.3508	-46.8711	51.82	1.19	17.02			7.51	9.07	8.17	0.13	1.16	3.58	0.34		66.1955	2.54735	1191	1.03987	1176.76	1.00703			46.6667						7134.05	204	305		184				6	1157	15	119	9.6
[10631]	CASCADES	CASCADES / HIGH CASCADES / WASHINGTON	45.64	-122.17	s_QV97-15 [10631]	BASALT [10631]	40.9858	-65.2993	51.39	1.12	16.8			7.65	9.61	8.32	0.13	1.02	3.69	0.27		66.1893	2.64411	1197.53	1.09891	1239.63	1.04705			47.7612						6714.4	180	287		146				8	1131	16	122	6.7
[7037][4329]	CASCADES	CASCADES / HIGH CASCADES / CALIFORNIA / MEDICINE LAKE VOLCANO	41.5043	-121.627	s_83-9 [7037]	BASALT, CALC-ALKALINE [7037]	56.4842	-146.539	51.91	0.94	16.95			8.37	9.77	7.23	0.15	0.84	2.93	0.15		60.8586	1.59516	1217.69	1.02826	1306.67	0.98451			48.7179						5635.3	188	142		120			15.9	23	195	24	120	3.9
[3657][4943]	CASCADES	CASCADES / HIGH CASCADES / CALIFORNIA / LASSEN VOLCANIC CENTER	40.492	-121.508	s_LM88-1619 [3657]	ANDESITE, BASALTIC [3657] / BASALT, CALC-ALKALINE [4943]	58.8505	-144.29	51.85	1.36	16.15	1.85	6.68	8.35	8.87	7.86	0.14	1.23	3.56	0.45	0.01	62.8856	2.59255	1216.32	1.13472	1296.31	1.03595			49.8	13.4167					8153.2		219		119				28	654	24	141	10
[7037][4329]	CASCADES	CASCADES / HIGH CASCADES / CALIFORNIA / MEDICINE LAKE VOLCANO	41.5135	-121.628	s_83-4 [7037]	BASALT, ANDESITIC [7037]	56.4842	-146.539	52.03	0.97	16.75			8.28	9.57	6.96	0.16	0.94	3.15	0.17		60.2076	1.8525	1216.18	1.03518	1287.63	0.976693			50.2439						5815.15	181	136		110			16.1	28	198	26	124	4.1
[3613]	CASCADES	CASCADES / HIGH CASCADES / CALIFORNIA / MOUNT SHASTA	41.4892	-122.308	s_85-4 [3613]	ANDESITE, BASALTIC [3613]	30.4652	-90.9422	52.78	0.68	17.28			7.41	9.35	8.73	0.15	0.47	3.01	0.13		67.9554	1.23828	1179.96	0.818651	1182.75	0.987733			50.3333						4076.6	189	439		148		70	17	4	363	15	43	3
[3613]	CASCADES	CASCADES / HIGH CASCADES / CALIFORNIA / MOUNT SHASTA	41.479	-122.189	s_82-94B [3613]	ANDESITE, BASALTIC [3613]	32.2728	-95.7695	52.4	0.71	15.3			6.96	9.54	9.9	0.14	0.75	3.09	0.21		71.9128	1.56868	1168.8	0.793601	1194.49	1.10663			50.6						4256.45	211	500		150		73	18	11	592	14	96	5
[3613]	CASCADES	CASCADES / HIGH CASCADES / CALIFORNIA / MOUNT SHASTA	41.4835	-122.291	s_85-6 [3613]	ANDESITE, BASALTIC [3613]	30.4652	-90.9422	52.95	0.72	17.76			7.28	9.64	7.51	0.14	0.45	3.41	0.14		64.9966	1.49745	1179.91	0.845128	1162.87	0.936661			51.6667						4316.4	204	318		99		67	16	6	353	16	48	3
[7037]	CASCADES	CASCADES / HIGH CASCADES / CALIFORNIA / MEDICINE LAKE VOLCANO	41.5142	-121.628	s_83-1 [7037]	BASALT, ANDESITIC [7037]	56.4842	-146.539	52.62	0.89	16.92			7.86	9.5	6.75	0.15	1.02	3.18	0.14		60.7196	1.83368	1201.88	0.947899	1206.45	0.945468			52						5335.55	174	133		97			17.8	31.5	199	25.9	126	4.5
[5304]	CASCADES	CASCADES / HIGH CASCADES / CALIFORNIA / MEDICINE LAKE VOLCANO / BURNT LAVA FLOW	41.58	-121.58	s_659MB [5304]	ANDESITE [5304]	56.0849	-144.917	47.9	0.62	18.4			7.92	11.97	9.9	0.15	0.19	2.09	0.07		69.2308	1.0609	1215.63	1.16926	1413.26	1.12873			52	0.824742				36.8	3716.9		250	48.8	212				2	220	16	59	1	0.46
[17450]	CASCADES	CASCADES / HIGH CASCADES / OREGON / MOUNT MAZAMA	42.873	-121.245	s_92C-1771 [17450]	BASALT [17450]	64.5544	-215.453	49.8	1.05	18	2.7	5.67	8.09946	11.01	7.97	0.15	0.37	3.06	0.18		63.9149	1.73013	1217.36	1.16854	1379.76	1.03805			52.1875	3.25				33.5	6294.75		235	40.8	115	99	66		13	545	24	99	3.2	0
[4790]	CASCADES	CASCADES / HIGH CASCADES / OREGON / THREE SISTERS	44.17	-121.5	s_96PRTS1 [4790]	BASALT [4790]	63.715	-149.499	50.98	1.15	15.67			8.86	8.7	8.83	0.14	1.2	2.9	0.29	0.39	64.2078	2.10652	1231.7	1.16582	1374.86	1.09145		0.120482	52.7143	10	1.82609				6894.25	150	411	41	85	20	70	19	22	728	22.5	166	7	0.5
[4329][7037]	CASCADES	CASCADES / HIGH CASCADES / CALIFORNIA / MEDICINE LAKE VOLCANO	41.5188	-121.627	s_1009M [4329]	BASALT, ANDESITIC [4329]	56.4842	-146.539	52.6	0.92	17.1			8.22	9.79	7.23	0.15	0.97	2.89	0.13	0.11	61.2885	1.55204	1209.65	0.979264	1256.56	0.971685			54.75	2.77372	1.57299			23.1	5515.4		120	34	101				25	201	24	115	4	1.73
[10631]	CASCADES	CASCADES / HIGH CASCADES / WASHINGTON	46.08	-122.35	s_V123A [10631]	BASALT [10631]	30.4348	-57.2314	51.13	1.16	15.33			8.14	9.09	9.86	0.14	1.68	3.12	0.34		68.5569	2.83395	1209.58	1.17219	1273.91	1.16017			56.1798						6954.2	200	290		151				32	1139	22	182	8.9
[10631]	CASCADES	CASCADES / HIGH CASCADES / WASHINGTON	45.4	-122.49	s_RCDA-9043 [10631]	BASALT [10631]	30.3508	-46.8711	50.83	1.29	16.11			8.32	8.89	8.75	0.14	1.47	3.53	0.66		65.4342	3.19285	1218.51	1.24504	1291.72	1.09375			56.7669						7733.55	178	341		223				13	1287	20	156	13.3
[3613]	CASCADES	CASCADES / HIGH CASCADES / CALIFORNIA / MOUNT SHASTA	41.544	-122.279	s_85-1B [3613]	ANDESITE, BASALTIC [3613]	30.4652	-90.9422	52.39	0.56	16.28			7.4	9.6	10.4	0.15	0.4	2.7	0.11		71.6692	1.02343	1178.39	0.797248	1240.34	1.09309			57						3357.2	210	658		224		63	14	6	315	15	37	2
[7037][4329]	CASCADES	CASCADES / HIGH CASCADES / CALIFORNIA / MEDICINE LAKE VOLCANO	41.4543	-121.629	s_1144M [7037]	BASALT, THOLEIITIC [7037]	56.4842	-146.539	52.7	0.92	17			7.63	9.18	7.53	0.14	1.14	3	0.15	0.35	63.9823	1.76697	1190.77	0.903273	1154.85	0.957848			58.25	3.55072				29.8	5515.4		164	39.7	130				33	239	23	128	4	2.12
[7037][4329]	CASCADES	CASCADES / HIGH CASCADES / CALIFORNIA / MEDICINE LAKE VOLCANO	41.5077	-121.63	s_1007M [7037]	BASALT, CALC-ALKALINE [7037]	56.4842	-146.539	50.9	0.98	17.3			8.7	10.4	7.62	0.16	0.69	2.79	0.15		61.1884	1.53296	1230.36	1.14574	1394.54	1.02519			58.3333	2.22222				34.7	5875.1		135	36.5	103				16	207	26	119	3	1.09
[10631]	CASCADES	CASCADES / HIGH CASCADES / WASHINGTON	46.03	-122.42	s_L01-6 [10631]	BASALT [10631]	30.0834	-53.3171	49.64	1.14	17.04			8.74	9.87	9.43	0.15	0.82	2.95	0.22		66.0107	2.1405	1232.93	1.30242	1419.94	1.12252			58.8525						6834.3	231	364		131				7	849	20	130	6.1
[10631]	CASCADES	CASCADES / HIGH CASCADES / WASHINGTON	46.08	-122.37	s_V458 [10631]	BASALT [10631]	27.6793	-52.96	50.51	1.1	16.03			7.95	10.18	8.78	0.13	1.59	3.35	0.38		66.532	3.24948	1210.84	1.23816	1279.93	1.13222			58.8889						6594.5	224	260		126				26	1400	16	150	9
[4684][10782]	CASCADES	CASCADES / HIGH CASCADES / CALIFORNIA / MOUNT SHASTA	41.3186	-122.167	s_95-17 [4684]	ANDESITE, BASALTIC [4684]	37.0809	-91.601	51.28	0.92	16.99	8.61		7.74728	10.3	8.41	0.14	0.22	3.02	0.13		66.1473	1.26783	1197.69	0.937262	1326.27	1.03371			58.8889	1.58371	1.58371	5		25	5515.4			40	118				1.2	364	18.4	70	0.9	0.03
[15195]	CASCADES	CASCADES / HIGH CASCADES / CALIFORNIA / TAHOE-TRUCKEE VOLCANIC FIELD / TRUCKEE LAVA GROUP	39.3207	-120.198	s_97-LT-21B [15195]	ANDESITE, BASALTIC [15195]	55.5056	-299.231	51.68	1.471	16.24			8.27	8.19	7.2	0.14	1.594	3.47	0.501	0.1	61.0457	2.95439	1217.02	1.13429	1227.24	0.984849			60.9375						8818.65	214	261	26	55		105		26	1236	19	171	16
[15195]	CASCADES	CASCADES / HIGH CASCADES / CALIFORNIA / TAHOE-TRUCKEE VOLCANIC FIELD / TRUCKEE LAVA GROUP	39.3207	-120.198	s_97-LT-21A [15195]	ANDESITE, BASALTIC [15195]	55.5056	-299.231	51.68	1.462	16.27			8.28	8.34	7.28	0.136	1.536	3.42	0.5		61.2795	2.82972	1216.83	1.12874	1236.91	0.990186			61.7093	23.4685	2.4965				8764.69	214	259	29	55		106		24	1274	19	164	14.86	0.53
[7175]	CASCADES	CASCADES / HIGH CASCADES / BRITISH COLUMBIA / MOUNT GARIBALDI VOLCANIC FIELD	50.42	-123.45	s_EV02 [7175]	BASALT [7175]			50.52	1.07	17			8.75	8.71	7.53	0.15	0.97	4	0.33		60.7694	3.28469	1236.51	1.33006	1356.04	1.02196		0.345946	62.25						6414.65	137	141		99	64	64		6	936	18	185	8
[4329][7037]	CASCADES	CASCADES / HIGH CASCADES / CALIFORNIA / MEDICINE LAKE VOLCANO	41.5105	-121.631	s_1008M [4329]	BASALT, CALC-ALKALINE [4329]	56.4842	-146.539	51.1	0.99	17.4			8.69	10.33	7.62	0.16	0.71	2.83	0.16		61.2157	1.54711	1229.7	1.14475	1383.37	1.01923			62.6667	2.45487				35	5935.05		133	36.8	118				14	200	24	116	3	1.15
[3613]	CASCADES	CASCADES / HIGH CASCADES / CALIFORNIA / MOUNT SHASTA	41.5485	-122.28	s_83-43 [3613]	BASALT [3613]	30.4652	-90.9422	49.09	1.03	17.14			6.84	10.38	9	0.17	0.27	2.96	0.11		70.3125	1.71312	1179.67	0.952338	1250.61	1.05766			65.5						6174.85	224	442		32		79	16	7	227	25	83	2
[7037]	CASCADES	CASCADES / HIGH CASCADES / CALIFORNIA / MEDICINE LAKE VOLCANO	41.5032	-121.627	s_879M [7037]	BASALT, CALC-ALKALINE [7037]	56.4842	-146.539	52.1	0.94	16.9			8.46	10.1	7.32	0.15	0.83	2.87	0.14	0.11	60.8985	1.5044	1219.21	1.03245	1329.03	0.999618			67.3333	2.80702				34.5	5635.3		142	40.3	116				22	200	25	119	3	1.52
[10631]	CASCADES	CASCADES / HIGH CASCADES / WASHINGTON	46.03	-122.41	s_V253A [10631]	BASALT [10631]	30.0834	-53.3171	49.78	1.15	15.75			8.28	10.7	9.51	0.14	1.49	2.82	0.37		67.399	2.73984	1221.73	1.27939	1369.44	1.1939			67.3494						6894.25	250	307		137				33	1328	24	179	8.3
[4329][7037]	CASCADES	CASCADES / HIGH CASCADES / CALIFORNIA / MEDICINE LAKE VOLCANO	41.5032	-121.63	s_1002M [4329]	BASALT, CALC-ALKALINE [4329]	56.4842	-146.539	52.2	0.94	17.4			8.34	9.98	7.16	0.15	0.86	2.85	0.15	0.95	60.7123	1.4961	1215.67	1.02014	1286.36	0.969974			68	2.63941				31.9	5635.3		130	33.3	112				19	194	25	113	3	1.35
[5304]	CASCADES	CASCADES / HIGH CASCADES / CALIFORNIA / MEDICINE LAKE VOLCANO / BURNT LAVA FLOW	41.58	-121.58	s_1143MB [5304]	ANDESITE [5304]	56.0849	-144.917	51.4	0.66	17.7			7.41	10.5	8.36	0.15	0.66	2.52	0.09		67.0051	1.20386	1186.46	0.886585	1202.03	1.0001			69	2.55924				32.4	3956.7		143	43.7	125				23	220	22	88	2	1.27
[15195]	CASCADES	CASCADES / HIGH CASCADES / CALIFORNIA / TAHOE-TRUCKEE VOLCANIC FIELD / BALD LAVA GROUP	39.3133	-120.188	s_97-LT-62B [15195]	BASALT [15195]	55.5056	-299.231	49.2	1.767	15.82			8.65	8.84	7.42	0.138	1.426	2.99	0.708	0.61	60.6925	3.14533	1239.04	1.29186	1376.05	1.04982			70.0276	30.9597	2.39516				10593.2	250	311	33	120		114		16	1553	15	182	14.48	0.15
[10631]	CASCADES	CASCADES / HIGH CASCADES / WASHINGTON	45.4	-122.49	s_RCDA-9044 [10631]	BASALT [10631]	30.3508	-46.8711	51.07	1.31	16.17			8.26	8.79	8.46	0.14	1.63	3.59	0.58		64.8331	3.37651	1216.73	1.24157	1260.15	1.07601			71.0769						7853.45	190	312		199				13	1418	21	167	13
[7037][4329]	CASCADES	CASCADES / HIGH CASCADES / CALIFORNIA / MEDICINE LAKE VOLCANO	41.5142	-121.628	s_863M [7037]	BASALT, ANDESITIC [7037]	56.4842	-146.539	53	0.91	16.8			8.1	9.64	7	0.15	1.03	2.9	0.12		60.8696	1.54449	1205.47	0.929005	1232.57	0.959349			74.6667	2.82313				31.5	5455.45		133	37	88				31	198	24	120	3	1.46
[6764]	CASCADES	CASCADES / HIGH CASCADES / CALIFORNIA / MEDICINE LAKE VOLCANO	41.616	-121.517	s_1141M [6764]	NOT GIVEN [6764]	58.6031	-157.887	51.8	0.46	20			6.13	9.53	7.87	0.09	0.75	2.68	0.1	0.11	69.797	1.33692	1148.71	0.757186	945.504	0.853172			78.3333	7.08824					2757.7				130				22	497		85	3
[4329][7037]	CASCADES	CASCADES / HIGH CASCADES / CALIFORNIA / MEDICINE LAKE VOLCANO	41.5075	-121.63	s_1006M [4329]	BASALT, CALC-ALKALINE [4329]	56.4842	-146.539	51.7	0.95	17.4			8.47	10.16	7.45	0.16	0.75	2.74	0.15	0.33	61.2888	1.40001	1220.08	1.04993	1327.74	0.991699			80.5	2.5				33.7	5695.25		130	36.4	114				16	207	23	108	2	1.31
[15661]	CASCADES	CASCADES / HIGH CASCADES / CALIFORNIA / MEDICINE LAKE VOLCANO	41.5305	-121.711	s_08MLV-01 [15661]	ANDESITE, BASALTIC [15661]	53.4409	-134.652	52.8	0.83	18.5			8.22	3.18	9.37	6.73	0.17	0.69			67.2327	0.0754694	1192.48	0.71261	946.306	0.728088			85.3333	4.35407					4975.85				90				14	421	18	100	3
[15661]	CASCADES	CASCADES / HIGH CASCADES / CALIFORNIA / MEDICINE LAKE VOLCANO	41.5285	-121.71	s_08MLV-02 [15661]	ANDESITE, BASALTIC [15661]	53.4409	-134.652	52.8	0.83	18.5			8.22	3.18	9.37	6.73	0.17	0.69			67.2327	0.0754694	1192.48	0.71261	946.306	0.728088			85.3333	4.35407					4975.85				90				14	421	18	100	3
[10631]	CASCADES	CASCADES / HIGH CASCADES / WASHINGTON	45.65	-122.18	s_QV98-16 [10631]	BASALT [10631]	40.0462	-65.3191	50.11	1.29	17.51			8.51	9.13	8.52	0.13	1.12	3.22	0.46		64.3127	2.64917	1225.59	1.27695	1311.67	1.04418			88.0952						7733.55	170	298		202				4	1382	19	157	8.4
[4329][7037]	CASCADES	CASCADES / HIGH CASCADES / CALIFORNIA / MEDICINE LAKE VOLCANO	41.4208	-121.656	s_328M [4329]	BASALT, CALC-ALKALINE [4329]	54.3331	-135.576	51.2	0.99	17.4			8.75	10.21	7.57	0.16	0.74	2.87	0.14		60.8956	1.58928	1230.91	1.15191	1381.41	1.01539			90.5	2.34528	1.4658			36.8	5935.05		142	41.8	105				21	207	27	119	2	1.29
[15673][3657][2261][4943]	CASCADES	CASCADES / HIGH CASCADES / CALIFORNIA / LASSEN VOLCANIC CENTER	40.6494	-121.227	s_LC86-829 [15673]	BASALT [15673] / ANDESITE, BASALTIC [3657] / BASALT, CALC-ALKALINE [4943]	58.58	-189.06	51.51	0.71	17.24	1.63	5.87	7.33	10.42	9.2	0.13	0.61	2.57	0.12	0.18	69.3177	1.1883	1182.81	0.875652	1219.11	1.04622			93.5	4.375					4256.45		401	39	158				6.7	452	15	75	2	0.43
[10631]	CASCADES	CASCADES / HIGH CASCADES / WASHINGTON	45.65	-122.19	s_L01-7 [10631]	BASALT [10631]	40.0462	-65.3191	50.02	1.25	17.11			8.23	9.67	8.77	0.13	1.05	3.3	0.46		65.7312	2.69551	1218.35	1.25309	1321.69	1.08058			94.9398						7493.75	154	317		214				3	1558	18	151	8.3
[3657][4943]	CASCADES	CASCADES / HIGH CASCADES / CALIFORNIA / LASSEN VOLCANIC CENTER	40.492	-121.508	s_LC82-886 [3657]	ANDESITE, BASALTIC [3657] / BASALT, CALC-ALKALINE [4943]	58.8505	-144.29	52.28	1.01	17.13	1.82	6.56	8.2	8.73	7.79	0.14	1.01	3.24	0.29	0.14	63.0996	1.94639	1208.73	1.02676	1232.25	0.975052			97.75	6.50943					6054.95		358	37.9	148				15	432	20	120	4	0.7
[10631]	CASCADES	CASCADES / HIGH CASCADES / WASHINGTON	45.49	-122.52	s_RC02-3 [10631]	BASALT [10631]	30.536	-47.2934	51.78	1.33	16.29			7.44	8.95	8.05	0.12	1.53	3.92	0.58		66.0739	3.38297	1191.08	1.10046	1167.47	1.03665			98.4091						7973.35	136	311		190				12	1666	18	157	8.8
[3657][4943]	CASCADES	CASCADES / HIGH CASCADES / CALIFORNIA / LASSEN VOLCANIC CENTER	40.492	-121.508	s_LB91-110 [3657]	BASALT [3657] / BASALT, CALC-ALKALINE [4943]	58.8505	-144.29	50.12	0.75	16.5	1.98	7.14	8.92	10.77	8.86	0.12	0.93	2.68	0.16	0.06	64.1306	1.83035	1238.96	1.262	1456.12	1.1359			154	7.5					4496.25		250	41	75				19	692	25	86	2	0.4
[19253]	CASCADES	CASCADES / ANCESTRAL CASCADES / SIERRA NEVADA	39.4849	-120.04	s_97-LT-85A [19253]	ANDESITE, BASALTIC [19253]	55.8301	-321.173	51.51	0.913	16.01			7.63	8.423	7.023	0.1466	1.134	2.32	0.193	4	62.3608	1.40189	1195.29	0.797445	1155.64	0.926791			243.5						5473.44	207	263	27	69		97		37	1007	16	89	4
[19253]	CASCADES	CASCADES / ANCESTRAL CASCADES / SIERRA NEVADA	39.4849	-120.04	s_97-LT-85C [19253]	BASALT [19253]	55.8301	-321.173	51.2	1.007	16.8			8.27	9.372	7.291	0.1574	1.132	2.83	0.252	0.5	61.3439	1.91432	1217.51	1.06183	1269.02	0.985942			354.599	20.6264	2.0977				6036.96	250	292	26	67		106		19	1140	18	88	3.37	2.82
[10630]	CASCADES	CASCADES / HIGH CASCADES / CALIFORNIA / MEDICINE LAKE VOLCANO	41.5	-121.5	s_1629 [10630]	BASALT [10630]	58.594	-159.634	48.16	0.72	18.26			8.71	11.44	9.92	0.15	0.1	2.47	0.06		67.2137	1.28002	1237.46	1.32343	1515.48	1.14515		1.67241							4316.4		177		212	97	58		0	217	18	58	0
[4459]	CASCADES	CASCADES / HIGH CASCADES / OREGON	44	-121.4	s_TS-621 [4459]	BASALT [4459]	64.9079	-165.343	50.2	1.35	17.1			9.4	9	9.1		0.55	3.3			63.5376	2.05868	1250.06	1.35308	1507.44	1.09287				3.125				28.2	8093.25		280	41.3	160				3	410		170		0.15
[4459]	CASCADES	CASCADES / HIGH CASCADES / OREGON	44	-121.4	s_TFJ-438 [4459]	BASALT [4459]	64.9079	-165.343	49.5	1.5	16.4			9.7	8.5	9.4		0.7	3.3			63.5612	2.46154	1262.63	1.45147	1564.56	1.13253				5.55024				27.2	8992.5		325	44.9	240				5	470		60		0.21
[4459]	CASCADES	CASCADES / HIGH CASCADES / OREGON	44	-121.4	s_BT-393 [4459]	BASALT [4459]	64.9079	-165.343	49.1	1.5	17.1			10	8.8	8.6		0.45	3.6			60.7535	2.68893	1276.83	1.57475	1628.8	1.10015				3.37607				27.7	8992.5		250	45.2	170				3	430		80		0.14
[4459]	CASCADES	CASCADES / HIGH CASCADES / OREGON / MOUNT WASHINGTON	44	-121.4	s_TFJ-440 [4459]	BASALT [4459]	64.9079	-165.343	49.9	1.2	16.3			8.7	9.4	10.2		1.5	2.9			67.8492	2.8058	1230.16	1.34137	1359.24	1.1758				11.3514				27.1	7194		370	42.4	230				1	1490		70		0.1
[5796]	CASCADES	CASCADES / HIGH CASCADES / CALIFORNIA / MEDICINE LAKE VOLCANO / CALLAHAN FLOW	41.715	-121.618	s_83/23B [5796]	BASALT [5796]	55.73	-143.301	49	0.48	18.5			8.2	9.9	11.3	0.12	0.55	2.29	0.43		71.2684	1.34427	1214.46	1.20006	1313.99	1.12737				4.1129				14.13	2877.6		91	60.3	300		65		23	490		89		0.94
[5796]	CASCADES	CASCADES / HIGH CASCADES / CALIFORNIA / MEDICINE LAKE VOLCANO / PAINT POT CRATER FLOW	41.558	-121.703	s_1658M [5796]	ANDESITE, BASALTIC [5796]	52.5402	-133.342	52.5	0.83	18.3			8.1	9.19	6.8	0.13	0.68	3.16	0.18		60.177	1.55217	1206.99	0.974173	1208.7	0.899445				4.94624				27.2	4975.85		120	36	108		79		19	505		112		0.79
[7037][4329]	CASCADES	CASCADES / HIGH CASCADES / CALIFORNIA / MEDICINE LAKE VOLCANO	41.4987	-121.618	s_1010M [7037]	BASALT, THOLEIITIC [7037]	56.4842	-146.539	49.1	0.95	17.7			9.27	11.43	8.79	0.17	0.3	2.72	0.11		63.056	1.49515	1254.54	1.39503	1583.16	1.12741				1.55172				38.1	5695.25		169	45.7	140				4	204	22	88
[4329][7037]	CASCADES	CASCADES / HIGH CASCADES / CALIFORNIA / MEDICINE LAKE VOLCANO	41.5083	-121.638	s_79-35G [4329]	BASALT, THOLEIITIC [4329]	56.4842	-146.539	48.2	0.66	18.6			8.39	12.07	9.86	0.15	0.07	2.29	0.05		67.9011	1.07108	1227.63	1.25521	1481.27	1.13722				0.728155				37.7	3956.7		195	50.3	198				0	179	17	56
[15661]	CASCADES	CASCADES / HIGH CASCADES / CALIFORNIA / MEDICINE LAKE VOLCANO	41.7847	-121.615	s_08MLV-12 [15661]	THOLEIITE, OLIVINE [15661]	55.4928	-142.054	47.3	0.71	18			8.55	2.38	11.8	10.4	0.08	0.062	0.37		71.2991	0.0046893	1224.88	1.20631	1010.86	0.850947		1.875		0.805825				35.8	4256.45		184	50.1	207	105	63			211	19	56
[15661]	CASCADES	CASCADES / HIGH CASCADES / CALIFORNIA / MEDICINE LAKE VOLCANO	41.7847	-121.615	s_08MLV-13 [15661]	THOLEIITE, OLIVINE [15661]	55.4928	-142.054	47.3	0.71	18			9.42	2.38	11.8	10.4	0.08	0.062	0.37		69.2759	0.0046893	1250.59	1.35397	1103.45	0.875715		1.875		0.805825				35.8	4256.45		225	50.1	207	105	63			211	19	56
[15661]	CASCADES	CASCADES / HIGH CASCADES / CALIFORNIA / MEDICINE LAKE VOLCANO	41.7833	-121.568	s_08MLV-14 [15661]	THOLEIITE, OLIVINE [15661]	55.4928	-142.054	47.6	0.77	18.4			9.56	2.47	11.7	9.91	0.1	0.094	0.33		68.7786	0.00818174	1252.72	1.3505	1112.56	0.866064		2.05556		0.874396				35.7	4616.15		201	48.6	176	111	65		1	224	19	54
[4705]	CASCADES	CASCADES / HIGH CASCADES / CALIFORNIA / MEDICINE LAKE VOLCANO	41.58	-121.58	s_ML-28 [4705]	NOT GIVEN [4705]	56.0849	-144.917	50.11	0.87	19.33	7.56	1.13	7.93249	8.82	6.95	0.15	0.42	3.09	0.14	0.55	61.1961	1.73278	1210.51	1.06709	1203.67	0.874538									5215.65	137			136				3	756	12	137
[3657][4943]	CASCADES	CASCADES / HIGH CASCADES / CALIFORNIA / LASSEN VOLCANIC CENTER	40.2688	-121.576	s_LC88-1371 [3657]	ANDESITE, BASALTIC [3657] / BASALT, CALC-ALKALINE [4943]	57.033	-125.828	51.99	0.82	16.57	1.86	6.68	8.35	10.28	8.34	0.15	0.22	2.92	0.09	0.05	64.2582	1.09673	1212.22	0.954945	1399.38	1.04773				1.88462					4915.9		344	40.5	100				6	280		130		0.17
[3657][2261][4943]	CASCADES	CASCADES / HIGH CASCADES / CALIFORNIA / LASSEN VOLCANIC CENTER	40.492	-121.508	s_LB92-170 [3657]	BASALT [3657] / NOT GIVEN [2261] / BASALT, CALC-ALKALINE [4943]	58.8505	-144.29	50.53	0.64	16.78	1.78	6.4	7.99	9.89	10.52	0.15	0.51	3.67	0.13	0.08	70.3261	2.32037	1207.92	1.20139	1354.65	1.16434				4.57143					3836.8		581	42	260				8.7	416	16	64		0.22
[3657][4943]	CASCADES	CASCADES / HIGH CASCADES / CALIFORNIA / LASSEN VOLCANIC CENTER	40.492	-121.508	s_LC87-1190 [3657]	ANDESITE, BASALTIC [3657] / BASALT, CALC-ALKALINE [4943]	58.8505	-144.29	50.98	0.85	16.36	1.84	6.61	8.26	10.14	9.11	0.14	0.76	2.92	0.29	0.08	66.5017	1.69704	1213.25	1.08301	1360.77	1.10564				9.25					5095.75		260	41.1	150				13	540		100		0.39
[7177]	CASCADES	CASCADES / HIGH CASCADES / WASHINGTON / INDIAN HEAVEN	45.913	-121.701	s_L00-14 [7177]	THOLEIITE [7177]	46.4665	-97.5381	50.8	1.19	16.86			9.65	9.52	8.15	0.16	0.41	3.1	0.15		60.3207	1.5795	1257.49	1.29896	1557.38	1.06429									7134.05		266		108					300	22	95
[7177]	CASCADES	CASCADES / HIGH CASCADES / WASHINGTON / INDIAN HEAVEN	45.914	-121.699	s_DS-6A-80 [7177]	THOLEIITE [7177]	46.4665	-97.5381	50.59	1.14	17.3			9.51	9.34	8.21	0.16	0.39	3.15	0.22		60.8449	1.65107	1254.17	1.30301	1518.68	1.04696									6834.3		280		108					291	20.7	99
[7177]	CASCADES	CASCADES / HIGH CASCADES / WASHINGTON / INDIAN HEAVEN	46.055	-121.565	s_DS69A-80 [7177]	BASALT [7177]	50.7096	-101.072	52.37	1.4	16.79			8.08	8.38	7.92	0.14	0.94	3.62	0.37		63.8252	2.21917	1204.64	1.0365	1245.37	0.986397									8393		373		186					569	19.1	157
[7177]	CASCADES	CASCADES / HIGH CASCADES / WASHINGTON / INDIAN HEAVEN	46.052	-121.843	s_DS-20-80 [7177]	BASALT [7177]	43.4722	-84.9263	52.21	1.44	16.8			8.21	8.57	7.71	0.14	1.07	3.55	0.3		62.8305	2.31752	1210.24	1.07815	1257.57	0.988891									8632.8		264		146					562	16.4	151
[7177]	CASCADES	CASCADES / HIGH CASCADES / WASHINGTON / INDIAN HEAVEN	45.938	-121.854	s_DS-26A-80 [7177]	BASALT [7177]	41.4293	-83.0089	49.33	1.4	17.61			9.32	9.65	8.33	0.16	0.7	3.23	0.27		61.6682	2.43995	1255.68	1.45525	1496.32	1.07278									8393		356		158					483	22.2	138
[7177]	CASCADES	CASCADES / HIGH CASCADES / WASHINGTON	46.019	-122.44	s_L00-6 [7177]	BASALT, CALC-ALKALINE [7177]	30.0834	-53.3171	49.78	1.15	15.75			8.28	10.7	9.51	0.14	1.49	2.82	0.37		67.399	2.73984	1221.73	1.27939	1369.44	1.1939									6894.25		350		137					1309	19.4	179
[7177]	CASCADES	CASCADES / HIGH CASCADES / WASHINGTON / INDIAN HEAVEN	46.037	-121.766	s_DS-42-81 [7177]	SHOSHONITE [7177]	43.6235	-87.6244	52.7	1.13	16			7.36	8.49	8.41	0.12	1.74	3.62	0.43		67.286	2.96181	1183.49	0.997891	1110.63	1.02864									6774.35		334		183					1058	14.7	184
[4705]	CASCADES	CASCADES / HIGH CASCADES / CALIFORNIA / MEDICINE LAKE VOLCANO	41.58	-121.58	s_ML-27 [4705]	NOT GIVEN [4705]	56.0849	-144.917	50.68	0.85	19.29	6.6	1.86	7.79868	8.8	7.23	0.13	0.53	3.29	0.1	0.49	62.5292	1.90005	1203.03	1.05499	1174.43	0.887467									5095.75	145			119				4	760	12	144
[4329]	CASCADES	CASCADES / HIGH CASCADES / CALIFORNIA / MEDICINE LAKE VOLCANO	41.5175	-121.627	s_1493M [4329]	BASALT, ANDESITIC [4329]	56.4842	-146.539	52.7	0.93	17			8.36	9.77	7.17	0.15	0.96	2.85	0.16	0.69	60.6884	1.49651	1213.87	0.985396	1275.61	0.972549									5575.35		121		103				26	199	31	116
[4329]	CASCADES	CASCADES / HIGH CASCADES / CALIFORNIA / MEDICINE LAKE VOLCANO	41.5175	-121.628	s_1494M [4329]	BASALT, ANDESITIC [4329]	56.4842	-146.539	52.4	0.94	16.9			8.41	10	7.24	0.15	0.92	2.93	0.14		60.7779	1.57686	1216.91	1.02318	1305.77	0.992095									5635.3		122		98				22	201	32	120
[4329]	CASCADES	CASCADES / HIGH CASCADES / CALIFORNIA / MEDICINE LAKE VOLCANO	41.4957	-121.638	s_1249M [4329]	BASALT, CALC-ALKALINE [4329]	56.4842	-146.539	51.4	1	17.1			8.74	10.25	7.61	0.16	0.77	2.86	0.16		61.0482	1.56868	1230.14	1.13426	1387.36	1.02541									5995				110				22	202	28	124
[4329]	CASCADES	CASCADES / HIGH CASCADES / CALIFORNIA / MEDICINE LAKE VOLCANO	41.4735	-121.669	s_1264M [4329]	BASALT, CALC-ALKALINE [4329]	53.4409	-134.652	52.1	0.95	17			8.48	10.23	7.26	0.15	0.85	2.91	0.14	0.14	60.646	1.55358	1220.31	1.05201	1332.22	1.00063									5695.25				100				20	203	25	120
[4329]	CASCADES	CASCADES / HIGH CASCADES / CALIFORNIA / MEDICINE LAKE VOLCANO	41.4953	-121.671	s_1373M [4329]	BASALT, CALC-ALKALINE [4329]	53.4409	-134.652	51.5	1.01	17.3			8.64	10.15	7.42	0.16	0.79	2.92	0.16	0.16	60.7201	1.61931	1227.08	1.1217	1359.38	1.00613									6054.95		135		111				20	223	29	133
[4329]	CASCADES	CASCADES / HIGH CASCADES / CALIFORNIA / MEDICINE LAKE VOLCANO	41.4853	-121.683	s_1488M [4329]	BASALT, CALC-ALKALINE [4329]	53.4409	-134.652	51.9	0.96	16.9			8.51	10.17	7.42	0.15	0.88	2.99	0.14	0.09	61.0811	1.6828	1221.8	1.08248	1341.12	1.01475									5755.2		125		104				25	201	33	126
[4329]	CASCADES	CASCADES / HIGH CASCADES / CALIFORNIA / MEDICINE LAKE VOLCANO	41.482	-121.649	s_1256M [4329]	BASALT, CALC-ALKALINE [4329]	56.4842	-146.539	50.7	0.97	17.5			8.77	10.55	7.71	0.16	0.63	2.86	0.15	0.1	61.2769	1.58183	1233.45	1.18845	1414.11	1.03332									5815.15				110				15	201	26	120
[4329]	CASCADES	CASCADES / HIGH CASCADES / CALIFORNIA / MEDICINE LAKE VOLCANO	41.4768	-121.64	s_1266M [4329]	BASALT, CALC-ALKALINE [4329]	56.4842	-146.539	50.4	1	17.2			8.96	10.72	7.95	0.16	0.6	2.81	0.15		61.4955	1.57136	1240.27	1.23295	1469.26	1.06555									5995				110				16	207	26	121
[4329]	CASCADES	CASCADES / HIGH CASCADES / CALIFORNIA / MEDICINE LAKE VOLCANO	41.4943	-121.684	s_1278M [4329]	BASALT, CALC-ALKALINE [4329]	53.4409	-134.652	50.8	1.04	17.3			8.93	10.56	7.59	0.16	0.65	2.81	0.16	0.29	60.4727	1.53482	1238.3	1.19861	1440.95	1.03659									6234.8				110				15	213	26	125
[4329]	CASCADES	CASCADES / HIGH CASCADES / CALIFORNIA / MEDICINE LAKE VOLCANO	41.4215	-121.657	s_1370M [4329]	BASALT, CALC-ALKALINE [4329]	54.3331	-135.576	50.5	0.99	17.2			8.87	10.63	7.95	0.16	0.61	2.89	0.14		61.7343	1.63333	1237.43	1.22182	1452.21	1.06156									5935.05		135		117				11	204	28	124
[4329]	CASCADES	CASCADES / HIGH CASCADES / CALIFORNIA / MEDICINE LAKE VOLCANO	41.4208	-121.656	s_1371M [4329]	BASALT, CALC-ALKALINE [4329]	54.3331	-135.576	51.4	0.99	17.1			8.77	10.33	7.56	0.16	0.74	2.9	0.14	0.04	60.8097	1.57733	1231.16	1.14193	1397.31	1.0272									5935.05		128		117				19	205	29	122
[4329]	CASCADES	CASCADES / HIGH CASCADES / CALIFORNIA / MEDICINE LAKE VOLCANO	41.4013	-121.641	s_1383M [4329]	BASALT, CALC-ALKALINE [4329]	56.8995	-147.799	50.5	0.99	17.4			8.88	10.64	7.92	0.16	0.58	2.84	0.15		61.6183	1.55952	1237.46	1.21793	1447.87	1.05252									5935.05		157		127				12	210	28	120
[4329]	CASCADES	CASCADES / HIGH CASCADES / CALIFORNIA / MEDICINE LAKE VOLCANO	41.4013	-121.641	s_1384M [4329]	BASALT, CALC-ALKALINE [4329]	56.8995	-147.799	50.9	0.98	17.3			8.78	10.45	7.75	0.16	0.66	2.87	0.14		61.3726	1.57733	1232.43	1.17176	1412.41	1.03686									5875.1		145		126				18	210	27	123
[4329]	CASCADES	CASCADES / HIGH CASCADES / CALIFORNIA / MEDICINE LAKE VOLCANO	41.4725	-121.692	s_1489M [4329]	BASALT, CALC-ALKALINE [4329]	53.4409	-134.652	51.1	1.03	17.1			8.82	10.31	7.5	0.16	0.75	3.01	0.18		60.4839	1.74538	1234.19	1.18513	1410.69	1.0321									6174.85		124		104				18	208	31	130
[4329]	CASCADES	CASCADES / HIGH CASCADES / CALIFORNIA / MEDICINE LAKE VOLCANO	41.4423	-121.658	s_1492M [4329]	BASALT, CALC-ALKALINE [4329]	54.3331	-135.576	51	0.98	17.1			8.76	10.51	7.74	0.16	0.71	2.91	0.15		61.3961	1.63805	1232.27	1.1727	1414.58	1.04513									5875.1		143		118				18	199	32	120
[4329]	CASCADES	CASCADES / HIGH CASCADES / CALIFORNIA / MEDICINE LAKE VOLCANO	41.5053	-121.65	s_88-11 [4329]	BASALT, THOLEIITIC [4329]	56.4842	-146.539	49.3	0.95	17.5			9.24	11.18	8.69	0.16	0.29	2.52	0.12	0.31	62.8647	1.25335	1251.57	1.31555	1569.33	1.11064									5695.25		154		146				9	205	26	95
[4329]	CASCADES	CASCADES / HIGH CASCADES / CALIFORNIA / MEDICINE LAKE VOLCANO	41.3922	-121.666	s_1018M [4329]	BASALT, THOLEIITIC [4329]	54.3331	-135.576	49.3	0.93	17.6			9.02	11.32	8.51	0.16	0.34	2.66	0.11		62.9386	1.42857	1245.7	1.3068	1534.85	1.10328									5575.35				130				5	201	24	91
[4329]	CASCADES	CASCADES / HIGH CASCADES / CALIFORNIA / MEDICINE LAKE VOLCANO	41.506	-121.641	s_1251M [4329]	BASALT, THOLEIITIC [4329]	56.4842	-146.539	49	0.95	17.8			9.14	11.36	8.6	0.16	0.29	2.58	0.13	0.09	62.8757	1.37282	1250.22	1.34229	1556.24	1.10588									5695.25				140				4	199	23	94
[4329]	CASCADES	CASCADES / HIGH CASCADES / CALIFORNIA / MEDICINE LAKE VOLCANO	41.502	-121.649	s_1252M [4329]	BASALT, THOLEIITIC [4329]	56.4842	-146.539	49	0.92	17.9			8.97	11.43	8.48	0.16	0.29	2.66	0.13		62.9859	1.45042	1245.75	1.32606	1531.38	1.09726									5515.4				120				4	197	23	88
[4329]	CASCADES	CASCADES / HIGH CASCADES / CALIFORNIA / MEDICINE LAKE VOLCANO	41.4933	-121.644	s_1253M [4329]	BASALT, THOLEIITIC [4329]	56.4842	-146.539	48.7	0.93	17.7			9.16	11.58	8.81	0.17	0.25	2.62	0.11		63.3864	1.44507	1253	1.38382	1586.32	1.13098									5575.35				140				5	198	23	88
[4329]	CASCADES	CASCADES / HIGH CASCADES / CALIFORNIA / MEDICINE LAKE VOLCANO	41.4892	-121.655	s_1257M [4329]	BASALT, THOLEIITIC [4329]	53.4409	-134.652	48.5	0.96	17.6			9.25	11.78	8.84	0.17	0.2	2.61	0.12		63.2382	1.43565	1256.67	1.41146	1623.52	1.14629									5755.2				150				3	204	23	88
[4329]	CASCADES	CASCADES / HIGH CASCADES / CALIFORNIA / MEDICINE LAKE VOLCANO	41.4927	-121.66	s_1259M [4329]	BASALT, THOLEIITIC [4329]	53.4409	-134.652	48.8	0.91	17.5			9.19	11.51	8.96	0.17	0.24	2.61	0.12		63.7017	1.40043	1252.61	1.3698	1594.41	1.14101									5455.45				130				3	207	24	89
[4329]	CASCADES	CASCADES / HIGH CASCADES / CALIFORNIA / MEDICINE LAKE VOLCANO	41.4597	-121.686	s_1277M [4329]	BASALT, THOLEIITIC [4329]	53.4409	-134.652	48.9	0.93	17.8			9.02	11.63	8.42	0.16	0.27	2.7	0.12		62.6903	1.49507	1248.31	1.34882	1556.43	1.10796									5575.35				120				5	203	24	89
[4329]	CASCADES	CASCADES / HIGH CASCADES / CALIFORNIA / MEDICINE LAKE VOLCANO	41.4092	-121.661	s_1369M [4329]	BASALT, THOLEIITIC [4329]	54.3331	-135.576	48.9	0.93	17.7			9.02	11.43	8.71	0.16	0.29	2.69	0.11		63.4788	1.50515	1247.46	1.34737	1551.3	1.11786									5575.35		155		139				2	199	23	94
[4329]	CASCADES	CASCADES / HIGH CASCADES / CALIFORNIA / MEDICINE LAKE VOLCANO	41.4953	-121.672	s_1374M [4329]	BASALT, THOLEIITIC [4329]	53.4409	-134.652	49	0.96	17.6			9.22	11.45	8.57	0.16	0.28	2.68	0.11		62.5903	1.46027	1253.81	1.37192	1584.63	1.11916									5755.2		164		138				7	202	26	94
[4329]	CASCADES	CASCADES / HIGH CASCADES / CALIFORNIA / MEDICINE LAKE VOLCANO	41.4598	-121.685	s_1379M [4329]	BASALT, THOLEIITIC [4329]	53.4409	-134.652	48.9	0.91	17.8			9.04	11.45	8.7	0.16	0.27	2.63	0.1		63.4008	1.42542	1247.83	1.34147	1550.8	1.11304									5455.45		160		146				5	207	26	88
[4329]	CASCADES	CASCADES / HIGH CASCADES / CALIFORNIA / MEDICINE LAKE VOLCANO	41.6388	-121.505	s_1382M [4329]	BASALT, THOLEIITIC [4329]	58.6031	-157.887	48.9	0.92	17.7			9.11	11.42	8.74	0.16	0.27	2.63	0.11		63.3282	1.42542	1250.3	1.35391	1565.11	1.11904									5515.4		179		156				5	208	24	87
[4329]	CASCADES	CASCADES / HIGH CASCADES / CALIFORNIA / MEDICINE LAKE VOLCANO	41.2393	-121.604	s_1463M [4329]	BASALT, THOLEIITIC [4329]	57.7736	-148.157	48.6	0.9	17.8			8.99	11.62	8.88	0.16	0.24	2.71	0.1		64.0026	1.55402	1248.35	1.3773	1564.08	1.13143									5395.5		157		140				3	197	29	83
[4329]	CASCADES	CASCADES / HIGH CASCADES / CALIFORNIA / MEDICINE LAKE VOLCANO	41.1947	-121.567	s_1469M [4329]	BASALT, THOLEIITIC [4329]	57.7736	-148.157	48.7	0.91	17.7			9.04	11.64	8.81	0.16	0.26	2.71	0.11		63.6919	1.54753	1249.23	1.37551	1570.99	1.13272									5455.45		137		115				5	209	28	87
[4329]	CASCADES	CASCADES / HIGH CASCADES / CALIFORNIA / MEDICINE LAKE VOLCANO	41.3705	-121.639	s_1485M [4329]	BASALT, THOLEIITIC [4329]	56.8995	-147.799	48.4	0.91	17.7			8.93	11.86	9.04	0.16	0.21	2.65	0.1		64.5663	1.51474	1247.47	1.37655	1579.03	1.14879									5455.45		142		123				5	199	24	83
[4329]	CASCADES	CASCADES / HIGH CASCADES / CALIFORNIA / MEDICINE LAKE VOLCANO	41.3705	-121.639	s_1486M [4329]	BASALT, THOLEIITIC [4329]	56.8995	-147.799	48.4	0.91	18			9	11.64	9.19	0.16	0.2	2.47	0.12	0.35	64.7639	1.32017	1247.23	1.35962	1562.43	1.13446									5455.45		161		147				6	199	28	85
[4329]	CASCADES	CASCADES / HIGH CASCADES / CALIFORNIA / MEDICINE LAKE VOLCANO	41.3592	-121.637	s_1487M [4329]	BASALT, THOLEIITIC [4329]	56.8995	-147.799	49	0.91	17.7			8.98	11.38	8.7	0.16	0.33	2.75	0.12		63.5552	1.58107	1246.21	1.34738	1537.58	1.11605									5455.45		156		143				5	213	31	98
[4329]	CASCADES	CASCADES / HIGH CASCADES / CALIFORNIA / MEDICINE LAKE VOLCANO	41.4675	-121.618	s_1016M [4329]	BASALT, THOLEIITIC [4329]	56.4842	-146.539	49.2	0.94	17.6			9.1	11.31	8.51	0.16	0.34	2.69	0.11		62.7324	1.48079	1248.92	1.33533	1548.89	1.10733									5635.3				130				7	203	24	94
[4329]	CASCADES	CASCADES / HIGH CASCADES / CALIFORNIA / MEDICINE LAKE VOLCANO	41.3598	-121.593	s_1233M [4329]	BASALT, THOLEIITIC [4329]	56.8995	-147.799	49.2	0.95	17.4			9.15	11.47	8.52	0.17	0.33	2.69	0.12		62.6317	1.47103	1251.25	1.34623	1574.11	1.1209									5695.25				120				7	208	26	92
[4329]	CASCADES	CASCADES / HIGH CASCADES / CALIFORNIA / MEDICINE LAKE VOLCANO	41.396	-121.636	s_1385M [4329]	BASALT, THOLEIITIC [4329]	56.8995	-147.799	49.4	0.95	17.7			8.99	11.04	8.42	0.16	0.41	2.82	0.12		62.7682	1.63014	1244.65	1.32227	1507.89	1.09099									5695.25		161		141				6	209	28	106
[4329]	CASCADES	CASCADES / HIGH CASCADES / CALIFORNIA / MEDICINE LAKE VOLCANO	41.4978	-121.618	s_1456M [4329]	BASALT, THOLEIITIC [4329]	56.4842	-146.539	49.4	0.96	17.5			9.09	11.22	8.46	0.16	0.37	2.72	0.13	0.53	62.6203	1.49189	1247.88	1.32116	1541.73	1.10409									5755.2		114		124				9	203	29	98
[4329]	CASCADES	CASCADES / HIGH CASCADES / CALIFORNIA / MEDICINE LAKE VOLCANO	41.4955	-121.614	s_1457M [4329]	BASALT, THOLEIITIC [4329]	56.4842	-146.539	49.4	0.93	17.6			8.96	11.29	8.43	0.16	0.35	2.66	0.16	0.36	62.874	1.41564	1243.6	1.28687	1521.8	1.0959									5575.35		153		137				5	203	28	97
[4329]	CASCADES	CASCADES / HIGH CASCADES / CALIFORNIA / MEDICINE LAKE VOLCANO	41.3862	-121.586	s_1483M [4329]	BASALT, THOLEIITIC [4329]	56.8995	-147.799	49.6	0.93	17.6			8.9	11.07	8.44	0.16	0.44	2.81	0.13		63.0583	1.60038	1240.77	1.29021	1492.31	1.09152									5575.35		150		115				11	209	34	102
[4329]	CASCADES	CASCADES / HIGH CASCADES / CALIFORNIA / MEDICINE LAKE VOLCANO	41.154	-121.57	s_3B722 [4329]	BASALT, THOLEIITIC [4329]	57.7736	-148.157	48.1	0.84	17.6			8.82	12.03	9.63	0.16	0.15	2.51	0.09		66.2767	1.38737	1243.62	1.35828	1585.72	1.18052									5035.8		180		147				1	196	23	74
[4329]	CASCADES	CASCADES / HIGH CASCADES / CALIFORNIA / MEDICINE LAKE VOLCANO	41.218	-121.549	s_1467M [4329]	BASALT, THOLEIITIC [4329]	58.8303	-161.744	48.2	0.9	17.7			9	12	9.17	0.16	0.16	2.61	0.1	0.04	64.7142	1.47556	1250.24	1.39884	1604.59	1.16189									5395.5		159		135				2	202	27	80
[4329]	CASCADES	CASCADES / HIGH CASCADES / CALIFORNIA / MEDICINE LAKE VOLCANO	41.505	-121.644	s_82-72A1 [4329]	BASALT, THOLEIITIC [4329]	56.4842	-146.539	47.8	0.63	18			8.68	12.1	10.2	0.16	0.08	2.28	0.06		67.8994	1.16033	1239.44	1.33415	1557.47	1.18677									3776.85				185				1	180	17	48
[4329]	CASCADES	CASCADES / HIGH CASCADES / CALIFORNIA / MEDICINE LAKE VOLCANO	41.505	-121.644	s_82-72A2-3 [4329]	BASALT, THOLEIITIC [4329]	56.4842	-146.539	48.3	0.73	17.4			9.09	12.4	9.41	0.17	0.09	2.39	0.06		65.0761	1.16045	1251.63	1.3622	1644.74	1.18914									4376.35				140				0	183	18	51
[4329]	CASCADES	CASCADES / HIGH CASCADES / CALIFORNIA / MEDICINE LAKE VOLCANO	41.494	-121.667	s_1261M [4329]	BASALT, THOLEIITIC [4329]	53.4409	-134.652	47.9	0.67	18			8.74	12.15	10.02	0.15	0.07	2.28	0.06	0.13	67.3588	1.12704	1240.68	1.33093	1567.11	1.18034									4016.65				180				0	183	16	51
[4329]	CASCADES	CASCADES / HIGH CASCADES / CALIFORNIA / MEDICINE LAKE VOLCANO	41.3298	-121.615	s_1332M [4329]	BASALT, THOLEIITIC [4329]	57.3315	-148.398	47.7	0.6	18.4			8.31	12.1	10.4	0.14	0.07	2.24	0.05		69.2564	1.13534	1229.29	1.28934	1495.65	1.17219									3597		182		283				0	185	23	52
[4329]	CASCADES	CASCADES / HIGH CASCADES / CALIFORNIA / MEDICINE LAKE VOLCANO	41.4633	-121.685	s_1380M [4329]	BASALT, THOLEIITIC [4329]	53.4409	-134.652	47.8	0.63	18.4			8.5	12.12	9.95	0.15	0.07	2.29	0.05		67.8152	1.16033	1233.45	1.30286	1514.76	1.15754									3776.85		208		262				2	177	21	55
[4329]	CASCADES	CASCADES / HIGH CASCADES / CALIFORNIA / MEDICINE LAKE VOLCANO	41.4972	-121.633	s_1381M [4329]	BASALT, THOLEIITIC [4329]	56.4842	-146.539	47.7	0.63	18.3			8.47	12.09	10.29	0.15	0.06	2.32	0.05		68.6203	1.20519	1232.91	1.31652	1520.19	1.17693									3776.85		205		296				1	179	19	53
[4329]	CASCADES	CASCADES / HIGH CASCADES / CALIFORNIA / MEDICINE LAKE VOLCANO	41.3267	-121.555	s_1460M [4329]	BASALT, THOLEIITIC [4329]	57.3315	-148.398	47.7	0.63	18.2			8.49	12.2	10.1	0.15	0.08	2.41	0.06		68.1665	1.31917	1234.36	1.33279	1529.87	1.17903									3776.85		186		178				1	180	22	55
[4329]	CASCADES	CASCADES / HIGH CASCADES / CALIFORNIA / MEDICINE LAKE VOLCANO	41.3095	-121.57	s_1461M [4329]	BASALT, THOLEIITIC [4329]	57.3315	-148.398	47.8	0.64	18.3			8.56	12.18	9.89	0.15	0.08	2.38	0.06		67.529	1.26075	1236.47	1.33209	1531.51	1.16491									3836.8		161		161				3	179	25	59
[4329]	CASCADES	CASCADES / HIGH CASCADES / CALIFORNIA / MEDICINE LAKE VOLCANO	41.2772	-121.596	s_1462M [4329]	BASALT, THOLEIITIC [4329]	57.3315	-148.398	47.8	0.63	18.3			8.51	12	10.1	0.15	0.08	2.38	0.06	0.16	68.1154	1.26075	1234.03	1.32106	1517.17	1.16705									3776.85		155		177				2	177	22	54
[4329]	CASCADES	CASCADES / HIGH CASCADES / CALIFORNIA / MEDICINE LAKE VOLCANO	41.3418	-121.62	s_1464M [4329]	BASALT, THOLEIITIC [4329]	57.3315	-148.398	48	0.68	18			8.64	12.09	9.88	0.15	0.13	2.43	0.07		67.3025	1.31072	1238.14	1.33528	1544.05	1.17372									4076.6		178		163				3	176	22	61
[4329]	CASCADES	CASCADES / HIGH CASCADES / CALIFORNIA / MEDICINE LAKE VOLCANO	41.311	-121.545	s_1465M [4329]	BASALT, THOLEIITIC [4329]	58.684	-161.818	47.8	0.64	18			8.53	12.26	9.97	0.15	0.1	2.4	0.06		67.7821	1.30208	1235.83	1.32649	1542.58	1.18162									3836.8		167		157				3	186	24	54
[4329]	CASCADES	CASCADES / HIGH CASCADES / CALIFORNIA / MEDICINE LAKE VOLCANO	41.2805	-121.533	s_1538M [4329]	BASALT, THOLEIITIC [4329]	58.684	-161.818	47.9	0.71	18.1			8.61	12.25	9.63	0.16	0.14	2.42	0.07		66.8131	1.33747	1238.44	1.3403	1543.03	1.16472									4256.45		172		163				4	181	18	61
[4329]	CASCADES	CASCADES / HIGH CASCADES / CALIFORNIA / MEDICINE LAKE VOLCANO	41.47	-121.64	s_1458M [4329]	BASALT, THOLEIITIC [4329]	56.4842	-146.539	52.7	0.94	17.2			7.71	9.3	7.71	0.14	1.11	3.06	0.16	0.2	64.2857	1.79267	1192.86	0.935497	1168.78	0.967706									5635.3		121		136				27	253	31	135
[4329]	CASCADES	CASCADES / HIGH CASCADES / CALIFORNIA / MEDICINE LAKE VOLCANO	41.4815	-121.694	s_7B967 [4329]	BASALT, THOLEIITIC [4329]	53.4409	-134.652	52.7	0.85	17.1			8.02	9.83	7.39	0.14	0.94	2.91	0.13	0.26	62.3863	1.52809	1203.02	0.944722	1233.9	0.973568									5095.75		119		122				27	207	31	122
[25017]	CASCADES	CASCADES / HIGH CASCADES / OREGON / SOUTH SISTER	44.0834	-121.817	s_DMW [25017]	BASALT [25017]	54.702	-108.155	51.3	1.45	17.6			7.66	9.26	7.07	0.16	0.74	3.32	0.28		62.4252	1.98598	1199.24	1.01032	1224.24	0.940111				5.25	1.95				8692.75		184		104					462		128
[10631]	CASCADES	CASCADES / HIGH CASCADES / WASHINGTON	46.01	-122.45	s_V551C [10631]	BASALT [10631]	30.0834	-53.3171	49.8	1.07	15.63			8.05	10.48	9.75	0.14	1.49	3.23	0.36		68.5547	3.27624	1215.61	1.29816	1342.56	1.20777									6414.65	205	390		184				24	1200	18	150
[10631]	CASCADES	CASCADES / HIGH CASCADES / WASHINGTON	46.02	-122.44	s_V312 [10631]	BASALT [10631]	30.0834	-53.3171	49.61	1.15	15.56			8.27	10.91	9.7	0.14	1.54	2.76	0.37		67.8585	2.79728	1222.33	1.29456	1381.71	1.21814									6894.25	232	296		155				37	1350	25	178
[7037][4329]	CASCADES	CASCADES / HIGH CASCADES / CALIFORNIA / MEDICINE LAKE VOLCANO	41.5137	-121.64	s_82-64 [7037]	BASALT, CALC-ALKALINE [7037]	56.4842	-146.539	50.29	0.96	17.22			8.6	10.31	7.68	0.16	0.61	2.83	0.16		61.6482	1.62326	1230.13	1.15737	1401.52	1.03038									5755.2							16.5	16.6	203	26.5	115
[7037][4329]	CASCADES	CASCADES / HIGH CASCADES / CALIFORNIA / MEDICINE LAKE VOLCANO	41.4423	-121.605	s_1232M [7037]	BASALT, THOLEIITIC [7037]	56.8995	-147.799	49.4	0.97	17.5			9	11.2	8.22	0.16	0.41	2.75	0.14		62.1785	1.56025	1245.92	1.30828	1523.62	1.0916					1.61832				5815.15				120				5	207	24	106
[4329]	CASCADES	CASCADES / HIGH CASCADES / CALIFORNIA / MEDICINE LAKE VOLCANO	41.495	-121.618	s_1455M [4329]	BASALT, THOLEIITIC [4329]	56.4842	-146.539	49.6	0.92	17.5			8.91	11.24	8.45	0.16	0.41	2.74	0.12		63.0597	1.50341	1240.94	1.27797	1506.39	1.09832									5515.4		147		134				9	200	27	98
[4329]	CASCADES	CASCADES / HIGH CASCADES / CALIFORNIA / MEDICINE LAKE VOLCANO	41.3312	-121.584	s_1484M [4329]	BASALT, THOLEIITIC [4329]	57.3315	-148.398	47.7	0.64	18.1			8.51	12.16	10.27	0.15	0.07	2.34	0.06		68.4768	1.23577	1234.64	1.32452	1537.23	1.1871									3836.8		192		192				1	181	22	57
[15661]	CASCADES	CASCADES / HIGH CASCADES / CALIFORNIA / MEDICINE LAKE VOLCANO	41.5083	-121.211	s_08MLV-27 [15661]	THOLEIITE, OLIVINE [15661]	60.424	-202.814	48	1.12	17.9			9.74	2.72	11.1	8.79	0.16	0.22	0		67.2275	0.02888	1257.01	1.29728	1171.9	0.868896		1.17241							6714.4		168		120	102	54			315	25	87
[15661]	CASCADES	CASCADES / HIGH CASCADES / CALIFORNIA / MEDICINE LAKE VOLCANO	41.5083	-121.207	s_08MLV-28 [15661]	THOLEIITE, OLIVINE [15661]	60.424	-202.814	48.2	1.11	17.9			9.66	2.77	11.1	8.61	0.17	0.22	0.04		67.4089	0.02925	1253.32	1.26047	1162.75	0.86687		1.15909							6654.45		174		126	102	74			315	24	88
[15661]	CASCADES	CASCADES / HIGH CASCADES / CALIFORNIA / MEDICINE LAKE VOLCANO	41.6337	-121.362	s_08MLV-30 [15661]	THOLEIITE, OLIVINE [15661]	60.193	-171.945	48.3	0.79	18.3			9	11.13	9.66	0.17	0.11	2.48	0.08		65.8936	1.26568	1245.91	1.35867	1537.83	1.12817		1.79661							4736.05		200		178	106	60			235	21	59
[4703]	CASCADES	CASCADES / HIGH CASCADES / CALIFORNIA / MEDICINE LAKE VOLCANO / MODOC FLOWS	41.883	-121.883	s_80.26 [4703]	ANDESITE, BASALTIC [4703]	37.9483	-113.914	51.76	0.96	16.81			8.28	9.56	6.97	0.14	0.91	2.61	0.14		60.242	1.41443	1215.83	0.967961	1279.83	0.960311									5755.2
[4703]	CASCADES	CASCADES / HIGH CASCADES / CALIFORNIA / MEDICINE LAKE VOLCANO / MODOC FLOWS	41.883	-121.883	s_79.24C [4703]	ANDESITE, BASALTIC [4703]	37.9483	-113.914	52.94	0.8	18.54			7.14	9.29	6.55	0.13	0.71	3.14	0.16		62.2821	1.4912	1178.19	0.820942	1081.23	0.85672									4796
[4703]	CASCADES	CASCADES / HIGH CASCADES / CALIFORNIA / MEDICINE LAKE VOLCANO / MODOC FLOWS	41.883	-121.883	s_79.40G [4703]	ANDESITE, BASALTIC [4703]	37.9483	-113.914	51.59	0.97	16.78			8.41	9.94	7.16	0.15	0.84	2.76	0.16		60.5127	1.50873	1220.51	1.02851	1327.2	0.991086									5815.15
[4703]	CASCADES	CASCADES / HIGH CASCADES / CALIFORNIA / MEDICINE LAKE VOLCANO / MODOC FLOWS	41.883	-121.883	s_79.35D [4703]	BASALT [4703]	37.9483	-113.914	47.68	0.71	17.74			8.75	11.74	9.35	0.16	0.09	2.3	0.06		65.7936	1.22053	1243.19	1.31176	1562.75	1.14716									4256.45
[4768]	CASCADES	CASCADES / HIGH CASCADES / WASHINGTON / MOUNT ST. HELENS / CASTLE CREEK FLOWS	46.2	-122.18	s_70381-3S [4768]	GABBRO, OLIVINE [4768]	30.1525	-60.4699	48.5	0.92	16.7	11.1		9.98778	10.7	8.85	0.16	0.12	2.77	0.06		61.4636	1.51856	1279.66	1.50082	1738.46	1.16246									5515.4
[4768]	CASCADES	CASCADES / HIGH CASCADES / WASHINGTON / MOUNT ST. HELENS / CASTLE CREEK FLOWS	46.2	-122.18	s_81481-1 [4768]	GABBRO, OLIVINE [4768]	30.1525	-60.4699	48.5	1	17.2	9.28		8.35014	9.8	11.6	0.28	0.23	2	0.08		71.4331	0.904164	1220.08	1.14806	1437.45	1.17616									5995
[4768]	CASCADES	CASCADES / HIGH CASCADES / WASHINGTON / MOUNT ST. HELENS / CASTLE CREEK FLOWS	46.2	-122.18	s_72881-1 [4768]	GABBRO, OLIVINE [4768]	30.1525	-60.4699	48.9	0.45	18.7	8.21		7.38736	12.2	8.91	0.12	0.07	2.43	0.05		68.4643	1.05932	1196.25	1.02404	1325.66	1.06234									2697.75
[4768]	CASCADES	CASCADES / HIGH CASCADES / WASHINGTON / MOUNT ST. HELENS / CASTLE CREEK FLOWS	46.2	-122.18	s_41881-80A [4768]	GABBRO, OLIVINE [4768]	30.1525	-60.4699	47.4	1.27	16.6	11.3		10.1677	9.65	10.7	0.16	0.22	2.56	0.14		65.4485	1.75645	1286.42	1.63645	1758.17	1.23454									7613.65
[4326]	CASCADES	CASCADES / HIGH CASCADES / CALIFORNIA / MEDICINE LAKE VOLCANO	41.58	-121.58	s_9 [4326]	BASALT [4326]	56.0849	-144.917	48.5	0.91	14.6			10.7	10.6	11.5		0.12	2.3			65.9236	1.0648	1297.54	1.56456	1964.95	1.36805									5455.45
[4326]	CASCADES	CASCADES / HIGH CASCADES / CALIFORNIA / MEDICINE LAKE VOLCANO	41.58	-121.58	s_10 [4326]	BASALT [4326]	56.0849	-144.917	49	1.73	18.1			8.5	11.1	7.6		0.27	3			61.6772	1.78215	1233.86	1.28006	1488.81	1.03932									10371.4
[4326]	CASCADES	CASCADES / HIGH CASCADES / CALIFORNIA / MEDICINE LAKE VOLCANO	41.58	-121.58	s_11 [4326]	BASALT [4326]	56.0849	-144.917	48.4	0.96	18			8	12.4	7.2		0.16	2.6	0.11		61.8321	1.41067	1223.72	1.15522	1461.45	1.04313									5755.2
[4326]	CASCADES	CASCADES / HIGH CASCADES / CALIFORNIA / MOUNT SHASTA	41.4	-122.18	s_20 [4326]	BASALT [4326]	34.9064	-93.8827	49.1	0.56	17.4			6.1	12.2	6.8		0.25	2.3			66.7394	1.06598	1161.62	0.710651	1171.68	0.965724									3357.2
[15673][4943]	CASCADES	CASCADES / HIGH CASCADES / CALIFORNIA / LASSEN VOLCANIC CENTER	40.6392	-121.226	s_LM91-2116 [15673]	BASALT [15673] / BASALT, CALC-ALKALINE [4943]	58.58	-189.06	51.17	0.7	17.09	1.63	5.88	7.34667	9.84	10.15	0.14	0.6	2.64	0.14	0.14	71.3207	1.2849	1182.42	0.907233	1220.01	1.08048									4196.5
[5304]	CASCADES	CASCADES / HIGH CASCADES / CALIFORNIA / MEDICINE LAKE VOLCANO / BURNT LAVA FLOW	41.58	-121.58	s_695M [5304]	ANDESITE [5304]	56.0849	-144.917	47.5	0.64	18.5			8.18	12	10.2	0.14	0.11	1.89	0.07		69.1786	0.888889	1224.33	1.21327	1461.56	1.14479									3836.8
[4445]	CASCADES	CASCADES / HIGH CASCADES / CALIFORNIA / LASSEN VOLCANIC CENTER	40.5	-121.085	s_HC7-3 [4445]	THOLEIITE, OLIVINE [4445]	58.0099	-199.477	48.2	0.92	17.5			9.2	11.2	9.3	0.21	0.21	2.3	0.12		64.5335	1.21156	1253.78	1.35824	1594.57	1.14339									5515.4
[5709]	CASCADES	CASCADES / HIGH CASCADES / OREGON / MOUNT MAZAMA	42.93	-122.12	s_WC-31 [5709]	ANDESITE, BASALTIC [5709]	36.7553	-103.334	52.35	1.2	16.38			7.56	9.73	7.59	0.14	0.95	3.32	0.55		64.3766	1.95004	1191.4	0.94031	1226.1	1.005						10			7194		300	49	116	72	73		9.2	947
[5709]	CASCADES	CASCADES / HIGH CASCADES / OREGON / MOUNT MAZAMA	42.93	-122.12	s_WC-13 [5709]	ANDESITE, BASALTIC [5709]	36.7553	-103.334	51.4	1.13	16.76			7.65	9.49	7.61	0.14	0.85	3.46	0.4		64.1653	2.21144	1197.59	1.01596	1240.69	1.00069						12			6774.35		242	61	114	60	70		15	1015
[5709]	CASCADES	CASCADES / HIGH CASCADES / OREGON / MOUNT MAZAMA	42.93	-122.12	s_WC-18 [5709]	BASALT [5709]	36.7553	-103.334	50.89	1.16	16.37			7.82	9.43	7.4	0.14	0.89	3.57	0.42		63.0085	2.52112	1206.92	1.07914	1282.09	1.01488				11.1742		11			6954.2		235	71	104	69	85		15	1055
[3809]	CASCADES	CASCADES / HIGH CASCADES / OREGON / MOUNT JEFFERSON	44.692	-121.8	s_MJW-92 [3809]	ANDESITE [3809]	57.2117	-105.956	52.6	1.2	17.1	5.7	2.6	7.72886	8.4	6.9	0.14	0.82	3.2	0.4		61.6412	1.68338	1195.4	0.882029	1175.51	0.904794									7194
[4444]	CASCADES	CASCADES / HIGH CASCADES / CALIFORNIA / LASSEN VOLCANIC CENTER	40.5	-121.085	s_1 [4444]	BASALT [4444]	58.0099	-199.477	46.84	1.05	17.98	7.82	2.18	9.21644	10.34	8.66	0.18	0.88	1.96	0.06		62.8436	2.10042	1262.29	1.48128	1481.93	1.08879									6294.75
[4444]	CASCADES	CASCADES / HIGH CASCADES / CALIFORNIA / LASSEN VOLCANIC CENTER	40.5	-121.085	s_2 [4444]	BASALT [4444]	58.0099	-199.477	47.98	1.18	18.66	0.94	8.66	9.50581	9.92	9.48	0.15	0.27	2.48	0.07		64.2233	1.51857	1261.52	1.47516	1544.08	1.08954									7074.1
[4444]	CASCADES	CASCADES / HIGH CASCADES / CALIFORNIA / LASSEN VOLCANIC CENTER	40.5	-121.085	s_3 [4444]	BASALT [4444]	58.0099	-199.477	48.5	0.81	18.22	0.26	8.69	8.92395	11.58	8.97	0.15	0.09	2.24	0		64.4038	0.987073	1244.07	1.2782	1541.85	1.10163									4855.95
[7177]	CASCADES	CASCADES / HIGH CASCADES / WASHINGTON / MOUNT ADAMS	46.347	-121.712	s_L01-21 [7177]	BASALT, CALC-ALKALINE [7177]	46.7128	-86.5282	50.4	1.3	16.49			8.4	9.74	8.52	0.14	1.26	3.31	0.42		64.6107	2.82228	1223.1	1.26449	1341.22	1.09621									7793.5
[4329]	CASCADES	CASCADES / HIGH CASCADES / CALIFORNIA / MEDICINE LAKE VOLCANO	41.3838	-121.661	s_80-1J [4329]	BASALT, THOLEIITIC [4329]	54.3331	-135.576	49.1	0.91	17.3			9.22	11.55	8.74	0.17	0.31	2.62	0.11	0.11	63.0491	1.40736	1253.28	1.35617	1594.35	1.13754									5455.45		148
[4329]	CASCADES	CASCADES / HIGH CASCADES / CALIFORNIA / MEDICINE LAKE VOLCANO	41.3833	-121.66	s_80-2B [4329]	BASALT, THOLEIITIC [4329]	54.3331	-135.576	48.4	0.95	17.5			9.19	12.01	8.87	0.16	0.18	2.58	0.11		63.468	1.41067	1255.48	1.40309	1633.95	1.15714									5695.25		173
[4329]	CASCADES	CASCADES / HIGH CASCADES / CALIFORNIA / MEDICINE LAKE VOLCANO	41.4148	-121.675	s_80-31C [4329]	BASALT, THOLEIITIC [4329]	54.3331	-135.576	48.8	0.96	17.8			9.25	11.39	8.65	0.16	0.24	2.62	0.13	0.24	62.7317	1.41028	1254.91	1.38258	1585.2	1.1149									5755.2		174
[4329]	CASCADES	CASCADES / HIGH CASCADES / CALIFORNIA / MEDICINE LAKE VOLCANO	41.4145	-121.673	s_80-32 [4329]	BASALT, THOLEIITIC [4329]	54.3331	-135.576	49	0.94	17.8			9.12	11.34	8.64	0.16	0.3	2.65	0.13		63.035	1.45042	1249.61	1.35122	1552.27	1.1089									5635.3		144
[4329]	CASCADES	CASCADES / HIGH CASCADES / CALIFORNIA / MEDICINE LAKE VOLCANO	41.4393	-121.68	s_80-33E [4329]	BASALT, THOLEIITIC [4329]	54.3331	-135.576	49.3	0.94	17.4			9.13	11.35	8.54	0.16	0.36	2.73	0.12		62.7377	1.51557	1249.41	1.33751	1559.6	1.11781									5635.3		140
[4329]	CASCADES	CASCADES / HIGH CASCADES / CALIFORNIA / MEDICINE LAKE VOLCANO	41.3433	-121.62	s_80-34B [4329]	BASALT, THOLEIITIC [4329]	57.3315	-148.398	49.3	0.94	17.5			9.1	11.31	8.58	0.16	0.34	2.66	0.12		62.9237	1.42857	1247.95	1.31979	1550.47	1.11161									5635.3		164
[4329]	CASCADES	CASCADES / HIGH CASCADES / CALIFORNIA / MEDICINE LAKE VOLCANO	41.3032	-121.603	s_80-35 [4329]	BASALT, THOLEIITIC [4329]	57.3315	-148.398	48.8	0.95	17.8			9.26	11.19	8.82	0.17	0.28	2.51	0.16	0.59	63.1604	1.34209	1253.89	1.36676	1570.42	1.11354									5695.25		154
[4329]	CASCADES	CASCADES / HIGH CASCADES / CALIFORNIA / MEDICINE LAKE VOLCANO	41.154	-121.57	s_3B722 [4329]	BASALT, THOLEIITIC [4329]	57.7736	-148.157	48.2	0.84	17.7			8.85	12	9.58	0.16	0.15	2.44	0.09		66.0842	1.29002	1244.29	1.34858	1581.58	1.17108									5035.8
[4329]	CASCADES	CASCADES / HIGH CASCADES / CALIFORNIA / MEDICINE LAKE VOLCANO	41.505	-121.644	s_82-72A1-2 [4329]	BASALT, THOLEIITIC [4329]	56.4842	-146.539	48.4	0.71	17.9			8.78	12	9.55	0.17	0.1	2.37	0.05		66.1918	1.1298	1240.37	1.30071	1556.58	1.1547									4256.45
[4329]	CASCADES	CASCADES / HIGH CASCADES / CALIFORNIA / MEDICINE LAKE VOLCANO	41.3417	-121.572	s_2B193 [4329]	BASALT, THOLEIITIC [4329]	57.3315	-148.398	52.3	1	17.2			7.97	9.36	7.77	0.14	1.07	2.99	0.18	0.36	63.7001	1.77243	1201.96	0.987118	1212.9	0.980428									5995
[4447]	CASCADES	CASCADES / HIGH CASCADES / CALIFORNIA / LASSEN VOLCANIC CENTER	40.5	-121.085	s_4-3^I [4447]	BASALT [4447]	58.0099	-199.477	49.85	1.11	17.59	1.01	8.09	8.9988	10.72	8.09		0.53	2.83	0.18		61.8061	1.64812	1243.26	1.28167	1486.12	1.06683									6654.45
[4447]	CASCADES	CASCADES / HIGH CASCADES / CALIFORNIA / LASSEN VOLCANIC CENTER	40.5	-121.085	s_4-18I [4447]	BASALT [4447]	58.0099	-199.477	49.9	1.01	17.81	0.98	7.89	8.7718	10.83	8.3		0.46	2.63	0.15		63.0066	1.38378	1234.16	1.20474	1449.27	1.05856									6054.95
[4447]	CASCADES	CASCADES / HIGH CASCADES / CALIFORNIA / LASSEN VOLCANIC CENTER	40.5	-121.085	s_4-5I [4447]	BASALT [4447]	58.0099	-199.477	50.1	1.01	17.98	0.99	7.98	8.8708	10.4	8.38		0.45	2.52	0.16		62.9686	1.24238	1235.09	1.18267	1433.78	1.03938									6054.95
[4447]	CASCADES	CASCADES / HIGH CASCADES / CALIFORNIA / LASSEN VOLCANIC CENTER	40.5	-121.085	s_4-0I [4447]	BASALT [4447]	58.0099	-199.477	49.56	1.01	17.74	1.01	8.11	9.0188	10.64	8.31		0.58	2.84	0.19		62.3853	1.78299	1244.57	1.31882	1476.1	1.07449									6054.95
[4447]	CASCADES	CASCADES / HIGH CASCADES / CALIFORNIA / LASSEN VOLCANIC CENTER	40.5	-121.085	s_54-54I [4447]	BASALT [4447]	58.0099	-199.477	49.26	0.99	17.9	1.02	8.19	9.1078	10.92	8.7		0.32	2.53	0.16		63.2273	1.29752	1246.79	1.29423	1524.42	1.08754									5935.05
[4447]	CASCADES	CASCADES / HIGH CASCADES / CALIFORNIA / LASSEN VOLCANIC CENTER	40.5	-121.085	s_54-28I [4447]	BASALT [4447]	58.0099	-199.477	48.78	0.98	17.54	1.05	8.47	9.41479	11.19	8.97		0.32	2.62	0.13		63.1671	1.49543	1259.09	1.40995	1607.3	1.13798									5875.1
[4447]	CASCADES	CASCADES / HIGH CASCADES / CALIFORNIA / LASSEN VOLCANIC CENTER	40.5	-121.085	s_54-16I [4447]	BASALT [4447]	58.0099	-199.477	48.98	0.98	17.37	1.03	8.28	9.20679	11.31	8.99		0.31	2.63	0.13		63.7368	1.44542	1251.81	1.35249	1588.36	1.14037									5875.1
[4684]	CASCADES	CASCADES / HIGH CASCADES / CALIFORNIA / MOUNT SHASTA	41.3191	-122.168	s_97-2 [4684]	ANDESITE, BASALTIC [4684]	37.0809	-91.601	51.9	0.69	15.88	7.74		6.96445	9.78	9.36	0.13	0.86	3.01	0.27	0.24	70.7529	1.6828	1171.97	0.836032	1176.8	1.07764									4136.55
[10630]	CASCADES	CASCADES / HIGH CASCADES / CALIFORNIA / MOUNT SHASTA	41.5668	-122.131	s_83-43 [10630]	BASALT [10630]	32.63	-102.17	50.7	1.06	17.7			7.06	10.72	9.3	0	0.28	3.06	0.11		70.3361	1.44878	1179.54	0.942765	1252.76	1.05792									6354.7
[15717]	CASCADES	CASCADES / HIGH CASCADES / OREGON / THREE SISTERS	44.1	-121.75	s_CR-42 [15717]	BASALT [15717]	58.0496	-120.178	51.48	1.04	16.26			8.7	9.4	8.74	0.15	0.65	2.97	0.21		64.391	1.54533	1223.96	1.08264	1401.4	1.07252									6234.8
[15717]	CASCADES	CASCADES / HIGH CASCADES / OREGON / THREE SISTERS	44.1	-121.75	s_TS-130 [15717]	BASALT [15717]	58.0496	-120.178	52.68	1.1	17.33			7.73	8.65	7.11	0.13	0.99	3.53	0.35	-0.21	62.3441	2.11058	1195.43	0.961762	1166.94	0.928832									6594.5
[15717]	CASCADES	CASCADES / HIGH CASCADES / OREGON / THREE SISTERS	44.1	-121.75	s_TS-131 [15717]	BASALT [15717]	58.0496	-120.178	51.52	1.1	16.94			8.22	9.27	8.02	0.14	0.77	3.32	0.3	0.43	63.7182	1.96339	1212.38	1.07588	1302.67	1.01485									6594.5
[2472]	CASCADES	CASCADES / HIGH CASCADES / CALIFORNIA	41.5	-120.57	s_CA-3 [2472]	BASALT [2472]	58.5352	-286.111	46.7	0.9	17.32			9.38	11.41	8.25	0.17	0.25		0.12		61.2877	0.0168919													5395.5								1.08	303
[15673]	CASCADES	CASCADES / HIGH CASCADES / CALIFORNIA / LASSEN VOLCANIC CENTER	40.56	-121.16	s_LC86-836 [15673]	BASALT [15673]	58.58	-189.06	49.29	0.95	17.16	1.94	7	8.74561	10.68	9.31	0.16	0.53	2.75	0.24		65.7083	1.7104	1235.7	1.28313	1475.34	1.13205									5695.25
[15673]	CASCADES	CASCADES / HIGH CASCADES / CALIFORNIA / LASSEN VOLCANIC CENTER	40.56	-121.16	s_LM90-1980A [15673]	BASALT [15673]	58.58	-189.06	49.01	0.98	16.71	1.99	7.17	8.9606	10.17	10.27	0.16	0.57	2.69	0.29	-0.11	67.3526	1.76832	1240.85	1.33107	1508.58	1.18294									5875.1
[15673]	CASCADES	CASCADES / HIGH CASCADES / CALIFORNIA / LASSEN VOLCANIC CENTER	40.65	-121.225	s_LC02-2384 [15673]	BASALT [15673]	58.5403	-192.27	52.89	0.93	17.83	1.67	6.01	7.51267	9.16	6.81	0.14	1.04	3.25	0.26		62.0009	1.86088	1189.28	0.91283	1122.93	0.903234									5575.35
[15673]	CASCADES	CASCADES / HIGH CASCADES / CALIFORNIA / LASSEN VOLCANIC CENTER	40.66	-121.217	s_LM90-2072 [15673]	BASALT [15673]	58.5403	-192.27	52.32	1.18	17.24	1.73	6.24	7.79665	9.26	7.03	0.14	1.18	3.31	0.39	0.19	61.8758	2.1631	1200.33	1.00906	1187.15	0.950714									7074.1
[15673]	CASCADES	CASCADES / HIGH CASCADES / CALIFORNIA / LASSEN VOLCANIC CENTER	40.66	-121.217	s_LM90-2081 [15673]	BASALT [15673]	58.5403	-192.27	52.4	1.2	17.33	1.72	6.2	7.74766	9.3	6.99	0.13	1.14	3.18	0.41	0.2	61.8899	1.98536	1197.91	0.975752	1179.12	0.94097									7194
[15673]	CASCADES	CASCADES / HIGH CASCADES / CALIFORNIA / LASSEN VOLCANIC CENTER	40.66	-121.217	s_LM90-2093 [15673]	BASALT [15673]	58.5403	-192.27	52.56	0.95	16.88	1.64	5.92	7.39567	10.05	7.71	0.13	0.87	3.02	0.25		65.2356	1.58286	1184.5	0.87355	1189.94	0.988318									5695.25
[15673]	CASCADES	CASCADES / HIGH CASCADES / CALIFORNIA / LASSEN VOLCANIC CENTER	40.66	-121.217	s_LM91-2128 [15673]	BASALT [15673]	58.5403	-192.27	52.79	0.92	17.13	1.6	5.75	7.18968	9.9	7.6	0.14	0.93	3.01	0.24	0.01	65.5496	1.58566	1178.09	0.841525	1142.38	0.964469									5515.4
[15673]	CASCADES	CASCADES / HIGH CASCADES / CALIFORNIA / LASSEN VOLCANIC CENTER	40.66	-121.217	s_LC86-828 [15673]	BASALT [15673]	58.5403	-192.27	51.37	1.01	17.83	1.72	6.19	7.73766	10.37	7.75	0.14	0.62	2.77	0.22	0.85	64.3223	1.37301	1198.03	0.965586	1251.13	0.981818									6054.95
[15673]	CASCADES	CASCADES / HIGH CASCADES / CALIFORNIA / LASSEN VOLCANIC CENTER	40.66	-121.217	s_LM91-2157 [15673]	BASALT [15673]	58.5403	-192.27	52.31	0.95	17.34	1.64	5.91	7.38567	9.92	7.8	0.14	0.88	2.86	0.24	0.03	65.5289	1.50243	1184.57	0.879478	1170.59	0.972477									5695.25
[15673]	CASCADES	CASCADES / HIGH CASCADES / CALIFORNIA / LASSEN VOLCANIC CENTER	40.66	-121.217	s_LM91-2160 [15673]	BASALT [15673]	58.5403	-192.27	52.17	0.96	17.59	1.65	5.94	7.42467	9.94	7.71	0.14	0.75	2.9	0.24	0.13	65.1468	1.45284	1185.79	0.886452	1180.99	0.962959									5755.2
[15673]	CASCADES	CASCADES / HIGH CASCADES / CALIFORNIA / LASSEN VOLCANIC CENTER	40.66	-121.217	s_LM03-3999C [15673]	BASALT [15673]	58.5403	-192.27	52.77	0.91	17.32	1.6	5.75	7.18968	9.81	7.66	0.14	0.87	2.9	0.26	0.44	65.727	1.45475	1176.86	0.821724	1135.26	0.95442									5455.45
[15673]	CASCADES	CASCADES / HIGH CASCADES / CALIFORNIA / LASSEN VOLCANIC CENTER	40.58	-121.16	s_LC86-849 [15673]	BASALT [15673]	58.58	-189.06	51.39	1.22	17.66	1.81	6.52	8.14864	9.93	6.94	0.15	0.87	3.19	0.33		60.5214	1.96467	1214.9	1.09888	1282.16	0.965332									7313.9
[15673]	CASCADES	CASCADES / HIGH CASCADES / CALIFORNIA / LASSEN VOLCANIC CENTER	40.58	-121.16	s_LM90-2045 [15673]	BASALT [15673]	58.58	-189.06	50.62	1.21	17.91	1.85	6.68	8.34463	10.1	7.09	0.15	0.83	3.23	0.33		60.4644	2.1632	1223.81	1.19702	1322.71	0.983822									7253.95
[15673]	CASCADES	CASCADES / HIGH CASCADES / CALIFORNIA / LASSEN VOLCANIC CENTER	40.58	-121.16	s_LM90-1958 [15673]	BASALT [15673]	58.58	-189.06	50.47	0.98	17.46	1.87	6.75	8.43263	9.98	8.32	0.15	0.76	2.99	0.26	0.01	63.9764	1.88253	1222.54	1.1749	1347.4	1.0432									5875.1
[15673]	CASCADES	CASCADES / HIGH CASCADES / CALIFORNIA / LASSEN VOLCANIC CENTER	40.58	-121.16	s_LM91-2104 [15673]	BASALT [15673]	58.58	-189.06	50.79	0.98	17.73	1.83	6.59	8.23663	9.83	7.88	0.16	0.78	3.16	0.27		63.2632	1.99276	1216.67	1.14446	1300.47	1.00705									5875.1
[15673]	CASCADES	CASCADES / HIGH CASCADES / CALIFORNIA / LASSEN VOLCANIC CENTER	40.63	-121.18	s_LM90-2034 [15673]	BASALT [15673]	58.58	-189.06	51.05	1.18	17.05	1.85	6.67	8.33463	9.2	8.46	0.15	0.98	3.09	0.31		64.6278	2.05775	1216.21	1.13165	1299.37	1.03513									7074.1
[15673]	CASCADES	CASCADES / HIGH CASCADES / CALIFORNIA / LASSEN VOLCANIC CENTER	40.63	-121.18	s_LM90-2051 [15673]	BASALT [15673]	58.58	-189.06	51.28	1.22	17.26	1.81	6.52	8.14864	9.02	8.12	0.15	1.08	3.2	0.35	-0.01	64.2048	2.21237	1210.88	1.11133	1251.42	1.00558									7313.9
[17287]	CASCADES	CASCADES / HIGH CASCADES / CALIFORNIA	43.83	-121.59	s_11J [17287]	BASALT [17287]	60.1763	-136.074	49.135	0.766	17.567			8.8506	11.337	8.7	0.174	0.195	2.482	0.126		63.8907	1.16811	1240.13	1.23415	1524.17	1.10147									4592.17
[17287]	CASCADES	CASCADES / HIGH CASCADES / CALIFORNIA	43.82	-121.53	s_SITKUM(15J) [17287]	BASALT [17287]	62.66	-150.81	50.597	1.204	16.844			8.4627	9.232	8.38	0.15	0.727	3.003	0.287		64.0599	1.83137	1221.4	1.12337	1355.01	1.03892									7217.98
[3986]	CASCADES	CASCADES / HIGH CASCADES / CALIFORNIA / MOUNT SHASTA	41.666	-122.03	s_242 [3986]	BASALT, OLIVINE [3986]	34.8066	-108.041	52.03	0.66	16.51	3.41	4.51	7.57832	9.48	9.59	0.14	0.41	2.97	0.12		69.4919	1.26516	1187.67	0.871596	1259.37	1.063									3956.7
[3986]	CASCADES	CASCADES / HIGH CASCADES / CALIFORNIA / MEDICINE LAKE VOLCANO / MODOC FLOWS	41.883	-121.883	s_200 [3986]	BASALT, OLIVINE [3986]	37.9483	-113.914	51.46	1	17.08	1.07	7.53	8.49279	9.96	7.4	0.15	0.85	3.05	0.16		61.0651	1.79787	1222.76	1.10855	1337.26	1.00689									5995
[3986]	CASCADES	CASCADES / HIGH CASCADES / CALIFORNIA / MEDICINE LAKE VOLCANO / PAINT POT CRATER FLOW	41.883	-121.883	s_187 [3986]	BASALT, OLIVINE [3986]	37.9483	-113.914	52.46	0.84	18.46	1.45	5.93	7.23471	9.42	6.88	0.15	0.66	3.25	0.18		63.1234	1.61608	1182.19	0.877241	1115.91	0.886135									5035.8
[3986]	CASCADES	CASCADES / HIGH CASCADES / CALIFORNIA / LASSEN VOLCANIC CENTER	40.5	-121.085	s_63 [3986]	BASALT, OLIVINE [3986]	58.0099	-199.477	48.46	1.07	17.39	1.76	7.97	9.55365	11.1	8.64	0.18	0.22	2.8	0.12		61.9462	1.6704	1266.94	1.47779	1653.05	1.13591									6414.65
[3613]	CASCADES	CASCADES / HIGH CASCADES / CALIFORNIA / MOUNT SHASTA	41.5895	-122.302	s_85-39 [3613]	BASALT [3613]	27.8658	-92.9379	49.42	0.92	17.1			7.67	10.64	9.28	0.17	0.33	2.43	0.13		68.532	1.18654	1199.93	0.993951	1341.46	1.08465									5515.4	204	450		44		65	16	7	222	25
[4464]	CASCADES	CASCADES / HIGH CASCADES / OREGON / MOUNT HOOD	45.374	-121.694	s_156 [4464]	NOT GIVEN [4464]	48.3736	-104.065	49.7	1.27	18.3	2.37	6.45	8.58253	10.2	7.2	0.15	0.82	3.34	0.28		60.1601	2.58293	1235.76	1.34069	1366.12	1.00004
[24962]	ALEUTIAN ARC	ALEUTIAN ARC / WESTERN ALEUTIAN ARC / BULDIR / BULDIR	52.3675	175.918	s_15BLMC001-2 [24962]	NOT GIVEN [24962]	18.8961	-21.9028	52.2361	0.744654	18.2577			7.59991	9.20143	7.85133	0.146709	0.772927	3.04703	0.142171		65.0294	1.5799	1190.08	0.929167	1149.33	0.934647	6.68631		171.748	5.04381	2.02351			28.5793	4464.2	191.09	256.691		119.185				14.3255	386.869	17.7368	91.6629	1.41824	0.745245
[19452]	ALEUTIAN ARC	ALEUTIAN ARC / WESTERN ALEUTIAN ARC / INGENSTREM DEPRESSION	52.4343	175.145	s_TN182_09_004 [19452]	BASALT [19452]	21.7211	-24.678	50.35	0.86	18.28			8.02	9.4	8.69	0.18	0.77	3.27	0.18	0.87	66.106	2.22063	1209.5	1.17209	1249.85	1.01462	6.72222	0.802083	201.429	4.84536	1.79897			36	5155.7	242	262		152	77	98	21	12.2	402	19.5	96	1.4	0.43
[6565][2195][4190]	ALEUTIAN ARC	ALEUTIAN ARC / CENTRAL ALEUTIAN ARC / KASATOCHI / KASATOCHI	52.17	-175.5	s_K81-7A [6565]	NOT GIVEN [6565] / ANDESITE [2195]	57.3397	-99.2703	49.07	0.66	15.75		9.8	8.82	12.52	8.77	0.14	0.76	2.24	0.15		64.1551	1.4827	1243.58	1.25203	1580.22	1.21077	6.78571	2.45495	156.552	3.01515	1.66667		0.42	42	3956.7	285	335		57	109	59	15.9	10.8	512	13.4	44.4	1.45	0.72
[8317]	ALEUTIAN ARC	ALEUTIAN ARC / ALASKA PENINSULA / UPPER ALASKA PENINSULA	57.83	-156.51	s_JRC10B [8317]	BASALT [8317]	41.733	-102.579	48.07	1.05	17.2	1.87	7.91	9.59263	9.95	9.13	0.16	0.82	3.04	0.23		63.143	2.93878	1270.28	1.61363	1558.39	1.15213	6.81529	0.842105		4	1.58333			31.4	6294.75	214	344		139	64	78		23	514	24	76		0.52
[24962]	ALEUTIAN ARC	ALEUTIAN ARC / WESTERN ALEUTIAN ARC / BULDIR / BULDIR	52.3575	175.898	s_15BLMC002 [24962]	NOT GIVEN [24962]	52.4456	-95.1644	51.403	0.768795	18.1996			7.53303	9.37849	8.55393	0.146634	0.688728	3.19935	0.128444		67.1478	1.79901	1189.9	0.995854	1177.95	0.982215	6.86803		168.384	3.97929	2.01436			29.3228	4608.93	201.39	298.998		133.868				10.0691	362.393	16.9023	87.0981	1.32935	0.175893
[24962]	ALEUTIAN ARC	ALEUTIAN ARC / WESTERN ALEUTIAN ARC / BULDIR / BULDIR	52.3643	175.919	s_15BLEC001-1 [24962]	NOT GIVEN [24962]	52.4456	-95.1644	51.8689	0.755963	18.6			7.60053	9.21256	7.91953	0.150132	0.738516	3.00845	0.145393		65.224	1.58303	1190.76	0.951513	1147.16	0.930182	6.89331		170.419	4.40148	1.93169			29.0357	4532	200.152	259.351		117.51				13.505	378.257	16.5369	91.4986	1.39449	0.681279
[19452][21215]	ALEUTIAN ARC	ALEUTIAN ARC / WESTERN ALEUTIAN ARC / INGENSTREM DEPRESSION	52.4842	175.277	s_TN182_08_014 [19452]	BASALT [19452] / ANDESITE, BASALTIC [21215]	51.7176	-88.1364	52.08	0.72	18.15			7.14	8.92	8.78	0.16	0.64	3.25	0.17	0.86	68.8808	1.66653	1176.15	0.896218	1116.14	0.961917	6.92857	0.790843	206.838	4.23729	1.70056			28	4316.4	194	300		179	76	85	19	11.9	448	17.1	96.1	1.17	0.45
[19452][21215]	ALEUTIAN ARC	ALEUTIAN ARC / WESTERN ALEUTIAN ARC / INGENSTREM DEPRESSION	52.5301	175.245	s_TN182_07_002 [19452]	BASALT [19452] / ANDESITE, BASALTIC [21215]	50.5711	-84.1014	52.01	0.73	17.16			7.49	9.12	9.1	0.16	0.92	3.14	0.16	0.99	68.6217	1.82948	1186.68	0.952516	1171.4	1.02374	6.96552	0.611222	205.797	5.52795	1.81988			29	4376.35	202	326		178	61	79	19	13.6	405	16.8	99.8	1.38	0.42
[19452]	ALEUTIAN ARC	ALEUTIAN ARC / WESTERN ALEUTIAN ARC / INGENSTREM DEPRESSION	52.4588	175.294	s_TN182_12_001 [19452]	BASALT [19452]	51.7176	-88.1364	51.45	0.84	18.2			7.68	9.14	8.25	0.17	0.74	3.37	0.16	0.44	65.9121	1.99907	1194.71	1.03273	1184.77	0.970726	7	1.48071	153.205	3.91534	1.73545			31	5035.8	217	247		129	142	89	21	10.3	393	18.8	95.9	1.56	0.4
[19452]	ALEUTIAN ARC	ALEUTIAN ARC / WESTERN ALEUTIAN ARC / INGENSTREM DEPRESSION	52.469	175.344	s_SO201-1B-21-004 [19452]	BASALT [19452]	51.7176	-88.1364	50.64	0.83	17.7			7.94	9.39	9.28	0.16	0.68	3.22	0.17	0.36	67.7812	1.99084	1203.55	1.10982	1263.59	1.04939	7.03125	0.730453	159.259	4.82955	1.82955			32	4975.85	225	347		174	71	71	20	10.8	410	18.8	97.2	1.62	0.41
[19452][21215]	ALEUTIAN ARC	ALEUTIAN ARC / WESTERN ALEUTIAN ARC / INGENSTREM DEPRESSION	52.513	175.194	s_SO201-1B-15-001 [19452]	BASALT [19452] / ANDESITE, BASALTIC [21215]	50.5711	-84.1014	51.78	0.77	16.4			7.57	10.21	8.92	0.15	0.89	3.04	0.26		67.959	1.7591	1190.94	0.962026	1247.31	1.0761	7.06452	0.823529	169.683	9.34641	2.06536			31	4616.15	219	384		135	84	67	19	12.4	593	17.2	102	2.21	0.13
[24809]	ALEUTIAN ARC	ALEUTIAN ARC / WESTERN ALEUTIAN ARC / MURRAY CANYONS	51.511	176.111	s_SO249-DR26-8 [24809]	NOT GIVEN [24809]	18.7119	-19.0362	50.2	0.82	16.94			8.22	12.26	8.22	0.13	0.6	2.48	0.12	0.83	64.2857	1.31756	1218.86	1.10148	1435.63	1.10975	7.11111	2						36	4915.9	256	582	35	149	118	69		10	330	19	59
[2218][6582][2251]	ALEUTIAN ARC	ALEUTIAN ARC / SECOND ALEUTIAN ARC / UMNAK / RECHESHNOI	53.2556	-168.546	s_LUM21 [2218]	ANDESITE [2218]	48.8385	-82.9464	50.07	0.72	15.92			8.15	10.12	10.1	0.15	0.86	2.35	0.13		69.0467	1.45744	1212.68	1.06171	1362.95	1.15711	7.14706	1.40323	186.614	5.17164	1.76119	9.22		34	4316.4	243	360		116	87	66		12.18	521	13.9	62	1.27	0.379
[19452]	ALEUTIAN ARC	ALEUTIAN ARC / WESTERN ALEUTIAN ARC / INGENSTREM DEPRESSION	52.502	175.222	s_SO201-1B-18-002 [19452]	BASALT [19452]	50.5711	-84.1014	51.12	0.83	17.73			7.92	9.48	8.65	0.16	0.73	3.23	0.15	0.33	66.2835	1.93123	1202.83	1.07493	1247.33	1.01871	7.15625	0.71506	142.236	3.76344	1.76882			32	4975.85	229	329		141	66	76	19	11.2	385	19.1	92.3	1.61	0.35
[19452]	ALEUTIAN ARC	ALEUTIAN ARC / WESTERN ALEUTIAN ARC / INGENSTREM DEPRESSION	52.513	175.194	s_SO201-1B-15-002 [19452]	BASALT [19452]	50.5711	-84.1014	51.92	0.78	16.34			7.55	10.08	9	0.15	0.89	3.03	0.26		68.2105	1.72269	1189.05	0.943878	1239.72	1.07478	7.19355	0.653218	166.96	9.53947	2.08553			31	4676.1	223	372		136	68	65	19	12.1	599	17.2	104.1	2.27	0.14
[19452]	ALEUTIAN ARC	ALEUTIAN ARC / WESTERN ALEUTIAN ARC / INGENSTREM DEPRESSION	52.4842	175.277	s_TN182_08_010 [19452]	BASALT [19452]	51.7176	-88.1364	51.93	0.72	18.03			7.24	8.91	8.96	0.16	0.64	3.26	0.16	0.23	69.0175	1.70325	1179.26	0.919644	1134.51	0.97731	7.22222	0.793826	195.763	4.21687	1.71687			27	4316.4	195	334		187	72	82	20	11.6	443	17.4	90.7	1.18	0.4
[19452]	ALEUTIAN ARC	ALEUTIAN ARC / WESTERN ALEUTIAN ARC / INGENSTREM DEPRESSION	52.4842	175.277	s_TN182_08_004 [19452]	BASALT [19452]	51.7176	-88.1364	52.31	0.73	18.03			7.01	8.78	8.83	0.15	0.68	3.32	0.17	0.56	69.394	1.71858	1171.2	0.871708	1095.5	0.960251	7.22222	0.679012	203.361	4.25287	1.77011			27	4376.35	195	319		188	66	74	19	11.5	441	18.3	97.2	1.19	0.41
[19452]	ALEUTIAN ARC	ALEUTIAN ARC / WESTERN ALEUTIAN ARC / INGENSTREM DEPRESSION	52.4588	175.294	s_TN182_12_002 [19452]	BASALT [19452]	51.7176	-88.1364	51.33	0.83	18.09			7.96	9.06	8.39	0.16	0.74	3.27	0.16	0.26	65.4843	1.93038	1203.27	1.06646	1220.19	0.98301	7.23333	0.622407	153.548	3.84211	1.71053			30	4975.85	217	257		140	60	77	19	11.7	379	18.8	96.4	1.55	0.4
[19452][24343]	ALEUTIAN ARC	ALEUTIAN ARC / WESTERN ALEUTIAN ARC / INGENSTREM DEPRESSION	52.513	175.194	s_SO201-1B-15-003 [19452]	BASALT [19452]	50.5711	-84.1014	51.72	0.74	15.92			7.66	9.6	10.11	0.15	0.86	2.99	0.25		70.3767	1.69983	1191.72	0.965449	1265.28	1.12578	7.24138	0.607843	186.567	9.66443	2.0604			29	4436.3	210	557		211	62	70	18	12.7	577	16.9	102	2.01	0.37
[19452]	ALEUTIAN ARC	ALEUTIAN ARC / WESTERN ALEUTIAN ARC / INGENSTREM DEPRESSION	52.4842	175.277	s_TN182_08_009 [19452]	BASALT [19452]	51.7176	-88.1364	51.9	0.79	18.33			7.33	9.03	8.1	0.16	0.81	3.38	0.17	0.54	66.545	1.9726	1183.31	0.962411	1122.12	0.944898	7.26667	0.539979	195.276	4.23077	1.7033			30	4736.05	218	192		123	52	72	22	11.5	448	18.2	96.3	1.27	0.4
[19452]	ALEUTIAN ARC	ALEUTIAN ARC / WESTERN ALEUTIAN ARC / INGENSTREM DEPRESSION	52.469	175.344	s_SO201-1B-21-005 [19452]	BASALT [19452]	51.7176	-88.1364	50.65	0.83	17.66			7.94	9.39	9.3	0.16	0.68	3.22	0.17	0.34	67.8282	1.98824	1203.89	1.11036	1265.76	1.05139	7.29032	0.760296	156.604	4.67836	1.80702			31	4975.85	226	345		173	72	73	19	10.7	396	18	94.7	1.59	0.39
[24962]	ALEUTIAN ARC	ALEUTIAN ARC / WESTERN ALEUTIAN ARC / BULDIR / BULDIR	52.3575	175.898	s_15BLEC005-5 [24962]	NOT GIVEN [24962]	52.4456	-95.1644	52.6615	0.736557	18.9179			7.4321	8.9501	6.94978	0.146609	0.790852	3.2633	0.151269		62.7309	1.70119	1185.87	0.907398	1091.99	0.868337	7.29265		202.824	4.83545	1.91731			25.5142	4415.66	186.066	165.578		93.2795				14.3818	393.305	17.0479	94.4994	1.40102	0.604619
[19452]	ALEUTIAN ARC	ALEUTIAN ARC / WESTERN ALEUTIAN ARC / INGENSTREM DEPRESSION	52.5301	175.245	s_TN182_07_001 [19452]	BASALT [19452]	50.5711	-84.1014	51.76	0.79	18.17			7.65	9.03	8.06	0.16	0.79	3.41	0.17	0.51	65.4752	2.0137	1193.45	1.01277	1167.81	0.95781	7.34483	0.68	234.454	4.62766	1.70745			29	4736.05	213	183		117	68	76	19	11.8	428	18.8	100	1.19	0.43
[19452][21215]	ALEUTIAN ARC	ALEUTIAN ARC / WESTERN ALEUTIAN ARC / INGENSTREM DEPRESSION	52.514	175.21	s_SO201-1B-16-007 [19452]	BASALT [19452] / ANDESITE, BASALTIC [21215]	50.5711	-84.1014	51.88	0.78	16.38			7.65	10.14	8.72	0.16	0.96	3.07	0.26	0.49	67.2321	1.82893	1193.01	0.973172	1245.5	1.06875	7.4	0.801527	164.957	9.6129	2.09677			30	4676.1	222	370		129	84	71	18	14.8	610	18.3	104.8	2.34	0.4
[19452]	ALEUTIAN ARC	ALEUTIAN ARC / WESTERN ALEUTIAN ARC / INGENSTREM DEPRESSION	52.5301	175.245	s_TN182_07_006 [19452]	BASALT [19452]	50.5711	-84.1014	51.96	0.79	18.39			7.3	9.1	7.93	0.16	0.79	3.4	0.17	0.54	66.163	1.95939	1182.62	0.955157	1119.05	0.936874	7.41379	0.610766	239.831	4.66667	1.72778			29	4736.05	215	182		119	59	74	21	12.6	418	18.3	96.6	1.18	0.41
[19452]	ALEUTIAN ARC	ALEUTIAN ARC / WESTERN ALEUTIAN ARC / INGENSTREM DEPRESSION	52.4842	175.277	s_TN182_08_005 [19452]	BASALT [19452]	51.7176	-88.1364	51.92	0.72	18.26			7.23	8.99	8.69	0.16	0.64	3.23	0.16	0.26	68.3893	1.67902	1178.57	0.91403	1124.66	0.96046	7.42308	0.578035	203.774	4.25806	1.72258			26	4316.4	193	313		174	50	72	21	11.1	383	15.9	86.5	1.06	0.38
[24962]	ALEUTIAN ARC	ALEUTIAN ARC / WESTERN ALEUTIAN ARC / BULDIR / BULDIR	52.3613	175.916	s_15BLEC003-1 [24962]	NOT GIVEN [24962]	52.4456	-95.1644	52.5563	0.732189	19.065			7.42376	8.96575	6.96172	0.14922	0.774813	3.21693	0.154288		62.7972	1.66738	1186.27	0.910998	1089.91	0.86448	7.44801		203.118	4.86378	1.97706			25.0085	4389.47	186.263	158.191		93.772				14.1341	399.525	17.3813	96.007	1.38121	0.588602
[19452][24343][21215]	ALEUTIAN ARC	ALEUTIAN ARC / WESTERN ALEUTIAN ARC / INGENSTREM DEPRESSION	52.532	175.215	s_SO201-1B-14-007 [19452]	BASALT [19452]	50.5711	-84.1014	50.72	0.77	15.99			7.9	9.57	10.76	0.16	0.89	2.98	0.25	0.32	71.0283	1.94001	1202.45	1.08999	1312.5	1.17234	7.44828	0.77451	203.046	8.66667	1.94545			29	4616.15	216	647		243	79	73	17	14.2	539	17.2	102	1.97	0.45
[19452]	ALEUTIAN ARC	ALEUTIAN ARC / WESTERN ALEUTIAN ARC / INGENSTREM DEPRESSION	52.5301	175.245	s_TN182_07_003 [19452]	BASALT [19452]	50.5711	-84.1014	51.75	0.79	18.33			7.56	9.08	7.93	0.16	0.83	3.4	0.17	0.92	65.3751	2.0449	1191.21	1.00764	1149.79	0.947501	7.44828	0.748988	238.843	4.7541	1.72131			29	4736.05	216	182		115	74	85	21	13	432	18.7	98.8	1.21	0.43
[19452]	ALEUTIAN ARC	ALEUTIAN ARC / WESTERN ALEUTIAN ARC / INGENSTREM DEPRESSION	52.5301	175.245	s_TN182_07_011 [19452]	BASALT [19452]	50.5711	-84.1014	51.79	0.78	18.27			7.58	9.02	8.07	0.16	0.81	3.35	0.17	0.69	65.7107	1.96878	1190.76	0.996115	1151.97	0.951588	7.44828	0.556745	245.045	4.74286	1.72			29	4676.1	216	194		118	52	72	20	12.5	416	17.8	93.4	1.11	0.41
[19452]	ALEUTIAN ARC	ALEUTIAN ARC / WESTERN ALEUTIAN ARC / INGENSTREM DEPRESSION	52.5301	175.245	s_TN182_07_008 [19452]	BASALT [19452]	50.5711	-84.1014	51.9	0.79	18.42			7.33	9.05	7.91	0.16	0.81	3.46	0.17	0.75	66.0145	2.04864	1184.37	0.974648	1121.17	0.937088	7.44828	0.643821	246.957	4.64865	1.73514			29	4736.05	216	183		112	62	79	21	12.9	430	18.4	96.3	1.15	0.43
[19452][24343][21215]	ALEUTIAN ARC	ALEUTIAN ARC / WESTERN ALEUTIAN ARC / INGENSTREM DEPRESSION	52.4842	175.277	s_TN182_08_003 [19452]	BASALT [19452]	51.7176	-88.1364	51.78	0.72	17.77			7.21	8.74	9.72	0.15	0.61	3.15	0.16	0.2	70.8168	1.61021	1176.97	0.907997	1141.85	1.0097	7.46154	0.656506	195.614	4.42177	1.78231			26	4316.4	194	359		223	56	72	21	8.8	398	15.5	85.3	1.14	0.16
[19452][21215]	ALEUTIAN ARC	ALEUTIAN ARC / WESTERN ALEUTIAN ARC / INGENSTREM DEPRESSION	52.4343	175.145	s_TN182_09_001 [19452]	BASALT [19452]	46.7536	-69.2901	50.41	0.86	18.17			7.97	9.36	8.85	0.18	0.77	3.25	0.17	0.29	66.6527	2.18089	1206.97	1.15429	1245.13	1.02115	7.46875	0.848953	195.763	4.21687	1.71687			32	5155.7	239	254		152	77	87	20	11.6	443	17.4	90.7	1.18	0.4
[24809]	ALEUTIAN ARC	ALEUTIAN ARC / WESTERN ALEUTIAN ARC / KOMANDORSKY BLOCK	55.269	167.065	s_SO249-DR148-1 [24809]	NOT GIVEN [24809]	9.92176	-18.1485	47.43	0.54	16.58			11.59	10.55	11.52	0.25	0.14	1.36	0.04	1.94	64.1465	0.507901	1328.3	1.78038	1966.94	1.30408	7.5	13.25						26	3237.3	195	152	59	80	159	86		0	289	12	12
[19452]	ALEUTIAN ARC	ALEUTIAN ARC / WESTERN ALEUTIAN ARC / INGENSTREM DEPRESSION	52.4842	175.277	s_TN182_08_015 [19452]	BASALT [19452]	51.7176	-88.1364	52.12	0.73	18.18			7.15	8.89	8.82	0.15	0.59	3.22	0.15	0.44	68.9481	1.59168	1175.59	0.883916	1118.27	0.959844	7.5	0.514223	191.057	4.23529	1.71765			26	4376.35	195	311		185	47	71	20	9.4	445	17.2	91.4	1.23	0.39
[19452]	ALEUTIAN ARC	ALEUTIAN ARC / WESTERN ALEUTIAN ARC / INGENSTREM DEPRESSION	52.514	175.21	s_SO201-1B-16-006 [19452]	BASALT [19452]	50.5711	-84.1014	51.81	0.78	16.35			7.6	10.12	8.92	0.16	0.95	3.06	0.26		67.8728	1.82521	1191.79	0.972166	1244.01	1.07703	7.51724	0.788462	160.338	9.41935	2.07097			29	4676.1	218	387		139	82	73	18	13.7	605	17.6	104	2.37	0.43
[19452][21215]	ALEUTIAN ARC	ALEUTIAN ARC / WESTERN ALEUTIAN ARC / INGENSTREM DEPRESSION	52.4842	175.277	s_TN182_08_013 [19452]	BASALT [19452]	51.7176	-88.1364	51.93	0.72	17.89			7.14	8.81	9.3	0.16	0.68	3.22	0.16	0.3	70.1005	1.70325	1175.1	0.903323	1121.62	0.990074	7.53846	0.573248	192.857	4.23729	1.72316			26	4316.4	196	339		203	54	70	18	13	408	17.6	94.2	1.26	0.42
[24962]	ALEUTIAN ARC	ALEUTIAN ARC / WESTERN ALEUTIAN ARC / BULDIR / BULDIR	52.3575	175.898	s_15BLEC005-4 [24962]	NOT GIVEN [24962]	52.4456	-95.1644	52.888	0.728305	19.0725			7.25483	8.98798	6.65792	0.145834	0.808865	3.29674	0.159054		62.2912	1.70469	1181.65	0.881652	1064.65	0.847946	7.53892		206.405	4.91196	1.93983			24.6155	4366.19	185.574	152.577		83.725				15.036	397.826	17.0036	98.7094	1.41554	0.63431
[19452]	ALEUTIAN ARC	ALEUTIAN ARC / WESTERN ALEUTIAN ARC / INGENSTREM DEPRESSION	52.4842	175.277	s_TN182_08_008 [19452]	BASALT [19452]	51.7176	-88.1364	52.21	0.76	18.13			7.46	9.01	8.2	0.16	0.69	3.22	0.17	0.35	66.4266	1.65995	1184.81	0.91962	1143.45	0.947314	7.55556	0.628507	203.636	4.10714	1.69643			27	4556.2	204	270		149	56	71	20	11.1	413	16.6	89.1	1.1	0.38
[16078]	ALEUTIAN ARC	ALEUTIAN ARC / CENTRAL ALEUTIAN ARC / TANAGA / UPPER SOUTH RIDGE	51.8	-178.01	s_03TGGM108 [16078]	BASALT [16078]	49.7177	-68.948	49.89	0.83	16			9.64	11.84	8.29	0.17	0.806	2.39	0.148		60.7524	1.4825	1265.34	1.36857	1637.25	1.17431	7.56899	2.01912	244.798	4.08901	2.02782			38.05	4975.85	288	243.2		57.5	105.6	72	17.7	7.48	488	14.96	52.3	0.817	0.133
[19452][21215]	ALEUTIAN ARC	ALEUTIAN ARC / WESTERN ALEUTIAN ARC / INGENSTREM DEPRESSION	52.4842	175.277	s_TN182_08_006 [19452]	BASALT [19452] / ANDESITE, BASALTIC [21215]	51.7176	-88.1364	52.09	0.73	18.09			7.25	8.88	8.79	0.16	0.61	3.23	0.16	0.6	68.5766	1.62218	1178.68	0.899629	1130.51	0.964334	7.57692	0.63854	198.246	4.21053	1.71345			26	4376.35	197	315		183	56	75	20	8.3	411	17.5	87.7	1.14	0.34
[19452]	ALEUTIAN ARC	ALEUTIAN ARC / WESTERN ALEUTIAN ARC / INGENSTREM DEPRESSION	52.4842	175.277	s_TN182_08_002 [19452]	BASALT [19452]	51.7176	-88.1364	52.17	0.73	18.23			7.11	8.85	8.7	0.15	0.63	3.31	0.12	0.2	68.7747	1.69287	1175.23	0.89296	1108.92	0.953869	7.57692	0.321839	207.547	4.1875	1.7125			26	4376.35	197	310		180	28	71	21	11.2	394	16.1	87	1.06	0.39
[19452]	ALEUTIAN ARC	ALEUTIAN ARC / WESTERN ALEUTIAN ARC / INGENSTREM DEPRESSION	52.4842	175.277	s_TN182_08_007 [19452]	BASALT [19452]	51.7176	-88.1364	52.17	0.73	18.01			7.07	8.82	9.07	0.16	0.64	3.18	0.16	0.38	69.7812	1.59132	1172.23	0.86824	1107.57	0.970604	7.57692	0.558659	193.333	4.23529	1.75882			26	4376.35	197	328		196	50	70	20	10	441	17.5	89.5	1.2	0.39
[19452]	ALEUTIAN ARC	ALEUTIAN ARC / WESTERN ALEUTIAN ARC / INGENSTREM DEPRESSION	52.4343	175.145	s_TN182_09_005 [19452]	BASALT [19452]	46.7536	-69.2901	50.36	0.86	18.07			8.14	9.25	9	0.18	0.74	3.23	0.17	0.21	66.5571	2.14143	1211.42	1.17304	1268.84	1.03107	7.59375	0.613155	203.731	4.78723	1.80851			32	5155.7	243	277		160	55	78	22	11.7	401	19	89.7	1.34	0.4
[19452][21215]	ALEUTIAN ARC	ALEUTIAN ARC / WESTERN ALEUTIAN ARC / INGENSTREM DEPRESSION	52.532	175.215	s_SO201-1B-14-008 [19452]	BASALT [19452]	50.5711	-84.1014	51.19	0.86	16.53			8.18	10.52	8.16	0.16	0.96	3.18	0.27	0.58	64.2295	2.09275	1213.91	1.12254	1334.44	1.07746	7.60606	0.788991	163.445	9.04192	2.11377			33	5155.7	251	231		79	86	73	19	14.8	610	19.2	109	2.38	0.37
[19452]	ALEUTIAN ARC	ALEUTIAN ARC / WESTERN ALEUTIAN ARC / INGENSTREM DEPRESSION	52.513	175.194	s_SO201-1B-15-005 [19452]	BASALT [19452]	50.5711	-84.1014	51.79	0.78	16.37			7.62	10.15	8.89	0.15	0.94	3.04	0.26		67.7419	1.80209	1192.1	0.970648	1246.86	1.07599	7.65517	0.699029	169.507	9.42308	2.03846			29	4676.1	222	376		137	72	69	18	11.1	592	17.2	103	2.23	0.38
[19452]	ALEUTIAN ARC	ALEUTIAN ARC / WESTERN ALEUTIAN ARC / INGENSTREM DEPRESSION	52.4343	175.145	s_TN182_09_002 [19452]	BASALT [19452]	46.7536	-69.2901	50.33	0.86	18.21			8.27	9.33	8.66	0.17	0.77	3.22	0.18	0.35	65.3366	2.17191	1216.44	1.19814	1278.34	1.0184	7.65625	0.675381	183.333	4.83696	1.77717			32	5155.7	245	260		158	62	80	20	13.5	408	19.8	91.8	1.5	0.42
[19452]	ALEUTIAN ARC	ALEUTIAN ARC / WESTERN ALEUTIAN ARC / INGENSTREM DEPRESSION	52.478	175.297	s_SO201-1B-20-007 [19452]	BASALT [19452]	51.7176	-88.1364	52.08	0.8	16.88			7.66	8.68	9.58	0.16	0.74	3.24	0.17	1	69.2419	1.74454	1189.45	0.951422	1207.25	1.04222	7.66667	0.632296	138	4.45026	1.7644			27	4796	207	354		209	65	75	18	12.5	410	19.5	102.8	2	0.43
[19452][21215]	ALEUTIAN ARC	ALEUTIAN ARC / WESTERN ALEUTIAN ARC / INGENSTREM DEPRESSION	52.532	175.215	s_SO201-1B-14-006 [19452]	BASALT [19452] / ANDESITE, BASALTIC [21215]	50.5711	-84.1014	52.26	0.72	16.47			7.38	9.49	9.22	0.15	0.97	3.06	0.26	0.48	69.2192	1.75388	1183.35	0.911506	1184.88	1.05495	7.73077	0.70159	188.406	9.16667	1.97436			26	4316.4	201	534		178	75	71	18	16.1	582	17.5	106.9	2.07	0.46
[24809]	ALEUTIAN ARC	ALEUTIAN ARC / WESTERN ALEUTIAN ARC / KRESTA RIDGE	52.282	172.276	s_SO249-DR49-1 [24809]	NOT GIVEN [24809]	8.61611	-12.3724	52.47	0.81	17.86			7.57	9.54	7.01	0.14	1.08	3.3	0.23	2.2	62.5025	2.02581	1192.95	0.971545	1143.41	0.930805	7.73077	0.429688						26	4855.95	201	277	26	98	55	63		20	439	19	128
[24809]	ALEUTIAN ARC	ALEUTIAN ARC / CENTRAL ALEUTIAN ARC / ADAK CANYON	51.34	-177.134	s_SO249-DR9-21 [24809]	NOT GIVEN [24809]	19.3793	-26.7	49.82	0.75	18.87			7.75	12.46	6.71	0.13	0.55	2.89	0.09	2.89	60.9139	1.73513	1212.48	1.14824	1320.91	0.991941	7.74286	5.03846						35	4496.25	271	350	39	83	131	57		8	439	12	26
[19452]	ALEUTIAN ARC	ALEUTIAN ARC / WESTERN ALEUTIAN ARC / INGENSTREM DEPRESSION	52.4343	175.145	s_TN182_09_003 [19452]	BASALT [19452]	46.7536	-69.2901	50.3	0.87	18.1			8.25	9.33	8.8	0.19	0.77	3.21	0.18	0.6	65.7534	2.16992	1215.8	1.19726	1281.25	1.02749	7.8125	0.688172	205.109	4.7619	1.82011			32	5215.65	250	266		162	64	89	22	12.1	399	19.2	93	1.37	0.43
[19452]	ALEUTIAN ARC	ALEUTIAN ARC / WESTERN ALEUTIAN ARC / INGENSTREM DEPRESSION	52.4842	175.277	s_TN182_08_001 [19452]	BASALT [19452]	51.7176	-88.1364	52.13	0.73	17.89			7.19	8.75	9.04	0.16	0.7	3.24	0.17	0.12	69.3547	1.70028	1176.4	0.897128	1119.62	0.976969	7.84	0.603175	200	4.22857	1.72571			25	4376.35	196	321		199	57	73	21	11.6	433	17.7	94.5	1.21	0.43
[19452]	ALEUTIAN ARC	ALEUTIAN ARC / WESTERN ALEUTIAN ARC / INGENSTREM DEPRESSION	52.532	175.215	s_SO201-1B-14-001 [19452]	BASALT [19452]	50.5711	-84.1014	51.59	0.88	16.88			7.87	10.63	7.58	0.16	0.99	3.15	0.26	0.39	63.4192	1.9953	1204.84	1.0526	1274.77	1.03098	7.84375	0.867925	139.216	8.42424	2.10303			32	5275.6	251	190		59	92	71	19	14.2	585	17.5	106	2.55	0.39
[19452]	ALEUTIAN ARC	ALEUTIAN ARC / WESTERN ALEUTIAN ARC / INGENSTREM DEPRESSION	52.5301	175.245	s_TN182_07_007 [19452]	BASALT [19452]	50.5711	-84.1014	51.89	0.79	18.36			7.42	9.07	7.97	0.16	0.8	3.37	0.17	0.49	65.9101	1.95601	1186.07	0.971678	1132.17	0.941595	7.85714	0.684524	227.869	4.75676	1.74054			28	4736.05	220	186		113	69	80	20	11.6	408	18.8	100.8	1.22	0.43
[19452]	ALEUTIAN ARC	ALEUTIAN ARC / WESTERN ALEUTIAN ARC / INGENSTREM DEPRESSION	52.478	175.297	s_SO201-1B-20-012 [19452]	BASALT [19452]	51.7176	-88.1364	51.8	0.81	17.23			7.58	8.86	9.35	0.15	0.77	3.27	0.17	0.61	68.9472	1.85473	1189.22	0.977293	1194.44	1.02995	7.88889	0.687023	137.288	4.58824	1.77059			27	4855.95	213	358		200	63	76	20	11.3	385	17.3	91.7	1.77	0.4
[19452]	ALEUTIAN ARC	ALEUTIAN ARC / WESTERN ALEUTIAN ARC / INGENSTREM DEPRESSION	52.4842	175.277	s_TN182_08_012 [19452]	BASALT [19452]	51.7176	-88.1364	51.85	0.72	17.71			7.27	8.63	9.59	0.15	0.68	3.22	0.16	0.29	70.3652	1.71864	1178.85	0.922369	1140.3	1.00647	8.04167	0.669643	211.111	4.11765	1.72353			24	4316.4	193	366		223	60	73	19	11.2	391	16.4	89.6	1.08	0.4
[19452]	ALEUTIAN ARC	ALEUTIAN ARC / WESTERN ALEUTIAN ARC / INGENSTREM DEPRESSION	52.5357	175.085	s_TN182_06_001 [19452]	BASALT [19452]	49.2773	-80.178	51.31	0.93	17.72			7.62	9.12	8.58	0.16	0.81	3.55	0.2	0.44	66.9615	2.28756	1193.78	1.06199	1198.37	1.00565	8.07407	0.563636	79.7203	4.91228	1.94152			27	5575.35	218	250		141	62	78	21	11.4	439	18.3	110	2.86	0.29
[19452]	ALEUTIAN ARC	ALEUTIAN ARC / WESTERN ALEUTIAN ARC / INGENSTREM DEPRESSION	52.4842	175.277	s_TN182_08_011 [19452]	BASALT [19452]	51.7176	-88.1364	51.87	0.73	17.8			7.27	8.71	9.39	0.16	0.68	3.23	0.16	0.43	69.9239	1.72357	1179.48	0.925271	1139.25	0.997742	8.125	0.639269	200	4.20732	1.72561			24	4376.35	195	370		214	56	72	22	10.6	409	16.5	87.6	1.11	0.4
[6565][22052]	ALEUTIAN ARC	ALEUTIAN ARC / CENTRAL ALEUTIAN ARC / RAT ISLANDS / KISKA	52	177.5	s_54-445 [6565]	NOT GIVEN [6565]	48.6597	-78.5191	49.29	0.82	15.64	3.38	6.01	9.05	9.93	10.7	0.15	0.44	2.61	0.11		68.0325	1.47893	1241.63	1.25249	1562.8	1.22389	8.20588	1.26582	114.407	2.92857	1.87143			34	4915.9	279	554		174	80	75	16.5	3.97	264	15.2	63.2	1.18	0
[24809]	ALEUTIAN ARC	ALEUTIAN ARC / CENTRAL ALEUTIAN ARC / ADAK CANYON	50.575	-178.245	s_SO249-DR11-1 [24809]	NOT GIVEN [24809]	6.44278	-10.4776	52.11	0.81	16.38			7.88	10.6	7.97	0.13	0.77	2.95	0.39	1.17	64.546	1.51903	1200.95	0.951051	1299.8	1.0461	8.27586	1.1						29	4855.95	240	336	34	132	88	70		10	454	13	80
[6565]	ALEUTIAN ARC	ALEUTIAN ARC / SECOND ALEUTIAN ARC / UMNAK	53.33	-168.33	s_46ABY531 [6565]	NOT GIVEN [6565]	47.5982	-77.8206	48.07	0.73	15.61			9.09	10.76	12.68	0.17	0.48	1.86	0.12		71.5172	1.08	1247.88	1.34044	1627.37	1.34636	8.35135	0.928433	125.749	4.83212	1.71533			37	4376.35	309	860		316	48	79	15.3	7.32	407	14.2	51.7	1.67	0.1
[6565][22052][7092]	ALEUTIAN ARC	ALEUTIAN ARC / ALASKA PENINSULA / UPPER ALASKA PENINSULA	57.83	-156.51	s_UK-25B [6565] / s_UK-253 (25B) [22052]	NOT GIVEN [6565]	41.733	-102.579	48.98	1.05	16.9	3.34	6.66	9.67	9.79	9.26		0.82	3.13	0.23		63.285	2.60911	1266.26	1.53802	1561.05	1.15603	8.8	0.611836	59.2133	5.41	1.82	6.5	0.42	30	6294.75	264	366		162	61	80	18.8	17.17	518	21.5	99.7	4.83	0.56
[19452]	ALEUTIAN ARC	ALEUTIAN ARC / WESTERN ALEUTIAN ARC / INGENSTREM DEPRESSION	52.4842	175.277	s_TN182_08_016 [19452]	BASALT [19452]	51.7176	-88.1364	51.94	0.73	18.19			7.39	8.92	8.75	0.16	0.57	3.18	0.16	0.2	68.064	1.57299	1181.75	0.912363	1146.12	0.963867	8.86364	0.485651	203.478	4.17647	1.68824			22	4376.35	195	328		177	44	83	21	11.2	410	17	90.6	1.15	0.4
[22260]	ALEUTIAN ARC	ALEUTIAN ARC / CENTRAL ALEUTIAN ARC / GREAT SITKIN / GREAT SITKIN	52.0186	-176.031	s_GS80-R13 [22260]	BASALT [22260]	52.8131	-75.4004	48.2279	0.791646	17.0338			9.73542	8.13775	10.4991	0.172951	1.35197	2.71693	0.0893517		66.0002	3.16686	1268.13	1.59517	1438.17	1.16135	9.40158	2.24801	409.024	1.96947	1.8556	35.759	1.08643	31.0533	4745.92	291.95	271.664	40.9954	89.3423	107.656	69.5211	17.7925	28.807	368.662	21.5624	47.8894	1.48957	8.54824
[2216]	ALEUTIAN ARC	ALEUTIAN ARC / CENTRAL ALEUTIAN ARC / SEGUAM / SEGUAM / TURF POINT FORMATION	52.27	-172.58	s_J87-64 [2216]	BASALT [2216]	48.3736	-80.4913	51.1	0.63	18.8	1.49	6.31	7.6507	11.6	6.8	0.14	0.29	2.08	0.12	-0.29	61.5363	0.693444	1198.64	0.86462	1254.14	0.923906				2.95098	1.89216				3776.85		141		53				15	6.68	296	7
[2565][2216]	ALEUTIAN ARC	ALEUTIAN ARC / CENTRAL ALEUTIAN ARC / SEGUAM / SEGUAM / TURF POINT FORMATION	52.29	-172.31	s_B87-36 [2565]	BASALT [2565]	46.7409	-74.5474	51.7	0.75	18	2.19	5.57	7.54056	9.2	7.78	0.15	0.48	2.46	0.15	0.56	65.0002	0.993517	1188.46	0.815899	1168.35	0.91766				4.40179	2.0625				4496.25		90						9.1	363	9	12
[2565]	ALEUTIAN ARC	ALEUTIAN ARC / CENTRAL ALEUTIAN ARC / SEGUAM / SEGUAM / TURF POINT FORMATION	52.29	-172.31	s_J87-36 [2565]	BASALT [2565]	46.7409	-74.5474	51.1	0.62	18.2	1.55	5.76	7.15469	11.5	8.01	0.14	0.34	1.95	0.13	0.51	66.8345	0.64742	1179.61	0.773576	1209.15	0.975112									3716.9		149						9	315	8	5
[4867]	ALEUTIAN ARC	ALEUTIAN ARC / SECOND ALEUTIAN ARC / UNIMAK / FISHER	54.75	-164.58	s_FC-57 [4867]	NOT GIVEN [4867]	48.9842	-116.353	48.2	0.7	13.49			8.76	11.71	10.77	0.15	0.59	1.48	0.12	4.22	68.8766	0.824019	1239.71	1.07927	1686.97	1.34455									4196.5	240	431		140				9	564	14	56
[4570]	ALEUTIAN ARC	ALEUTIAN ARC / ALASKA PENINSULA / KRUZOF / MOUNT EDGECUMBE	57.17	-135.67	s_61ABG734A [4570]	BASALT, OLIVINE-PIGEONITE-AUGITE [4570]			48	0.79	17.3	2.1	6.5	8.38958	11	9.6	0.17	0.13	2.5	0.13		67.317	1.38338	1229.17	1.22384	1495.5	1.14074									4736.05
[4570]	ALEUTIAN ARC	ALEUTIAN ARC / ALASKA PENINSULA / KRUZOF / MOUNT EDGECUMBE	57.17	-135.67	s_61ABD720 [4570]	BASALT, AUGITE [4570]			50	1.1	17.4	2.3	6.2	8.26954	10.8	7.1	0.18	0.2	3.4	0.3		60.7139	1.85143	1224.92	1.16812	1435.86	1.01838									6594.5
[2501][23819][15080][14905]	ALEUTIAN ARC	ALEUTIAN ARC / CENTRAL ALEUTIAN ARC / BULDIR / BULDIR	52.4	176	s_BUL6B [2501] / s_BI9-6B [14905]	BASALT, CALC-ALKALINE [2501] / ANDESITE, BASALTIC [23819]	52.4032	-97.349	52.66	0.65	18.31			6.78	8.78	7.35	0.12	0.81	3.34	0.14		66.1169	1.78287	1165.92	0.808656	1030.87	0.881361				4.09202		7.2361		26.1	3896.75		264	35	100				18	377				0.3
[2619]	ALEUTIAN ARC	ALEUTIAN ARC / CENTRAL ALEUTIAN ARC / RAT ISLANDS / LITTLE SITKIN	51.97	178.5	s_1 [2619]	BASALT [2619]	52.6425	-100.227	52.74	0.57	11.99	1.9	6.72	8.42962	12.49	11.02	0.17	0.64	1.78	0.11		70.1771	0.601273	1210.94	0.769799	1629.05	1.36924									3417.15
[2672]	ALEUTIAN ARC	ALEUTIAN ARC / CENTRAL ALEUTIAN ARC / ADAK	51.92	-176.75	s_HB55 [2672]	GABBRO [2672]	51.5903	-71.9032	49.72	1.17	17.61			9.01	10.86	8.16	0.14	0.54	2.72	0.21		61.9799	1.58149	1243.65	1.293	1491.57	1.07302				4.23684				31.2	7014.15		249	37	74				7	632	22	75		0.35
[2499]	ALEUTIAN ARC	ALEUTIAN ARC / SECOND ALEUTIAN ARC / UNALASKA / MAKUSHIN	53.67	-166.67	s_54-D-62 [2499]	BASALT, FELDSPAR [2499]	39.4211	-63.7293	50.33	0.86	17.96	2.59	6.35	8.68048	10.44	7.24	0.17	0.86	2.67	0.14		60.0208	1.69999	1233.99	1.20074	1352.55	0.994686									5155.7
[22767][23819][2239]	ALEUTIAN ARC	ALEUTIAN ARC / CENTRAL ALEUTIAN ARC / ADAK / HIDDEN BAY PLUTON	51.7343	-176.727	s_HB7-10 [22767]	GABBRO [22767]	40.0562	-48.9095	50.6362	0.915934	17.1642			8.61877	10.9485	7.5897	0.161235	0.889921	2.90022	0.175359	0.54	61.3165	1.8812	1231.52	1.21117	1396.21	1.0547			55.4459	4.81308	2.06615	9.20448		33.3515	5491.02		225.2	34.38	75.4				28	735	16.0875	59.0823	3.11384	1.07794
[4059][2551]	ALEUTIAN ARC	ALEUTIAN ARC / ALASKA PENINSULA / KRUZOF / MOUNT EDGECUMBE	57.17	-135.67	s_663 [4059]	BASALT, OLIVINE [4059]			47.59	1.07	16.63			10.53	10.53	8.89	0.19	0.15	2.84	0.16	0.19	60.3121	1.94773	1302.76	1.71909	1841.53	1.19199									6414.65									165
[4059][2551][2550]	ALEUTIAN ARC	ALEUTIAN ARC / ALASKA PENINSULA / KRUZOF / MOUNT EDGECUMBE	57.17	-135.67	s_ED-25 [4059]	BASALT, OLIVINE [4059] / NOT GIVEN [2550]			48.71	0.99	17.24			9.92	10.19	8.27	0.15	0.21	3.09	0.19	0.31	60.0097	1.90718	1277.9	1.52255	1669.72	1.1074									5935.05								4.6	192
[4059][2551][2550]	ALEUTIAN ARC	ALEUTIAN ARC / ALASKA PENINSULA / KRUZOF / MOUNT EDGECUMBE	57.17	-135.67	s_ED-30 [4059]	BASALT, OLIVINE [4059] / NOT GIVEN [2550]			47.54	1.12	16.55	1.74	9.24	10.8057	10.18	10.22	0.17	0.24	2.92	0.06		62.9964	2.19947	1309.53	1.85062	1867.04	1.2604									6714.4								3.4	162
[4059][2551]	ALEUTIAN ARC	ALEUTIAN ARC / ALASKA PENINSULA / KRUZOF / MOUNT EDGECUMBE	57.17	-135.67	s_ED-64 [4059]	BASALT, PLAGIOCLASE [4059]			49.87	1.19	18.7			7.86	10.94	6.59	0.14	0.23	3.47	0.24	0.17	60.146	1.99272	1214.7	1.16273	1340.46	0.955378									7134.05									329
[22260]	ALEUTIAN ARC	ALEUTIAN ARC / CENTRAL ALEUTIAN ARC / KANAGA / KANAGA	51.7693	-177.348	s_KAN80-37 [22260]	BASALT [22260]	47.1188	-63.738	50.28	0.75	16.1			8.74	9.99	11.19	0.13	0.58	2.57			69.7389	1.36298	1227.46	1.18022	1469.01	1.21281				3.17978				40.3	4496.25		946	43	222									0.25
[2611]	ALEUTIAN ARC	ALEUTIAN ARC / CENTRAL ALEUTIAN ARC / BULDIR / BULDIR	52.38	176	s_47AC27 [2611]	BASALT, OLIVINE [2611]	52.4032	-97.349	52.27	0.88	17.08	3.38	4.38	7.42132	9.08	7.7	0.12	0.8	3.52	0.2		65.1275	2.0132	1186.88	0.927287	1171.84	0.966804		1							5275.6	90	200	20	90	40		10		400		40
[2611]	ALEUTIAN ARC	ALEUTIAN ARC / CENTRAL ALEUTIAN ARC / BULDIR / BULDIR	52.39	175.99	s_47AC26 [2611]	ANDESITE, OLIVINE [2611]	52.4032	-97.349	52.28	0.8	17.69	2.35	4.84	6.95453	9.03	7.32	0.13	0.88	3.51	0.22		65.4528	2.07673	1173.81	0.876394	1084.4	0.919742		1							4796	80	200	20	100	40		8		400		40
[22767]	ALEUTIAN ARC	ALEUTIAN ARC / CENTRAL ALEUTIAN ARC / KAGALASKA / KAGALASKA PLUTON	51.8408	-176.442	s_KAG7-24 [22767]	NOT GIVEN [22767]	44.8495	-56.0218	51.94	0.8	18.94			6.08	8.52	7.79	0.29	0.88	3.84	0.06		69.7543	2.49199	1149.91	0.868518	957.065	0.880163				2.68487				25.3483	4796		296.806	28.2936	104.452					561.285				0.5975
[6992]	ALEUTIAN ARC	ALEUTIAN ARC / ALASKA PENINSULA / UPPER ALASKA PENINSULA / KATMAI GROUP	58.59	-154.56	s_1000 [6992]	BASALT [6992]	38.8431	-80.9192	51.94	0.73	16.03			9.13	10.75	7.79	0.17	0.7	2.11	0.24	0.89	60.565	0.883233	1237.7	1.01689	1470.41	1.06161			109.667	7.86585				36	4376.35		277	39.3	70		68		14.6	508	16	68	3	0.43
[6992]	ALEUTIAN ARC	ALEUTIAN ARC / ALASKA PENINSULA / UPPER ALASKA PENINSULA	57.83	-156.51	s_2687 [6992]	BASALT [6992]	41.733	-102.579	47.68	1.08	17.12			9.97	10.25	9.59	0.18	0.72	2.79	0.24	-0.41	63.3887	2.6325	1282.83	1.6971	1644.62	1.19313			47.6	4.76852				34.8	6474.6		330	47	169		58		12	505.3	20	93	5	0.23
[6992]	ALEUTIAN ARC	ALEUTIAN ARC / ALASKA PENINSULA / UPPER ALASKA PENINSULA	57.83	-156.51	s_2687A [6992]	BASALT [6992]	41.733	-102.579	48.16	1.08	17.22			9.87	10.05	9.15	0.18	0.81	2.85	0.24	-0.4	62.5285	2.59605	1277.45	1.63506	1595.32	1.15645			51.2						6474.6								15	521	20	98	5
[6992]	ALEUTIAN ARC	ALEUTIAN ARC / ALASKA PENINSULA / UPPER ALASKA PENINSULA	57.83	-156.51	s_2688 [6992]	BASALT [6992]	41.733	-102.579	48.25	1.07	17.15			9.89	9.97	9.2	0.18	0.8	2.86	0.25	-0.4	62.6087	2.55154	1277.77	1.629	1598.1	1.15779			52.2						6414.65								15	523	19	99	5
[6992]	ALEUTIAN ARC	ALEUTIAN ARC / ALASKA PENINSULA / UPPER ALASKA PENINSULA	57.83	-156.51	s_2688A [6992]	BASALT [6992]	41.733	-102.579	47.91	1.07	17.17			9.9	10.08	9.32	0.18	0.8	2.91	0.25	-0.48	62.888	2.80328	1280.01	1.67934	1610.96	1.17307			64						6414.65								15	528	19	99	4
[8317]	ALEUTIAN ARC	ALEUTIAN ARC / ALASKA PENINSULA / UPPER ALASKA PENINSULA	57.83	-156.51	s_JRC09 [8317]	BASALT [8317]	41.733	-102.579	47.67	1.29	16.57	1.96	7.39	9.15361	9.77	8.76	0.19	0.8	3.07			63.2704	3.20704	1259.69	1.52271	1538.8	1.14285									7733.55
[7197]	ALEUTIAN ARC	ALEUTIAN ARC / CENTRAL ALEUTIAN ARC / SEGUAM / SEGUAM	52.33	-172.4	s_SJ88-6 [7197]	NOT GIVEN [7197]	47.3508	-76.5659	51.75	0.68	18.62			8.35	10.8	7.07	0.14	0.4	2.36	0.08	-0.15	60.3815	0.870583	1215.97	0.971499	1305.34	0.93817			230	2.53103	1.57931				4076.6		88	27					7	289	13.6	38	0.8	0.6
[6992]	ALEUTIAN ARC	ALEUTIAN ARC / ALASKA PENINSULA / UPPER ALASKA PENINSULA / KATMAI GROUP	58.41	-155.26	s_2515 [6992]	BASALT [6992]	40.9145	-96.7017	51.69	0.67	17.26			8.43	11.21	7.1	0.16	0.52	2.38	0.17	0.64	60.2546	0.967779	1220.31	0.974836	1371.04	0.997065			34	3.75796				40.3	4016.65		166	37.7	60		74		9	343.6	13	57	5	0.31
[2224]	ALEUTIAN ARC	ALEUTIAN ARC / SECOND ALEUTIAN ARC / AKUTAN / AKUTAN / HOT SPRINGS BAY VOLCANICS	54.08	-165.92	s_AK4-4 [2224]	BASALT [2224]	41.7071	-74.6357	45	0.81	13.94			11.43	14.68	12.69	0.16	0.23	1.01			66.6492	0.7688	1354.14	2.14512	2403.25	1.66005									4855.95	440	167		117				3	238
[2224]	ALEUTIAN ARC	ALEUTIAN ARC / SECOND ALEUTIAN ARC / AKUTAN / AKUTAN / HOT SPRINGS BAY VOLCANICS	54.08	-165.92	s_AK4-M [2224]	BASALT [2224]	41.7071	-74.6357	45.28	0.76	14.57			11.19	13.9	12.47	0.16	0.29	1.39			66.7321	1.23789	1343.07	2.11562	2253.41	1.59057									4556.2	432	153		116				3	238
[2247]	ALEUTIAN ARC	ALEUTIAN ARC / ALASKA PENINSULA / AUGUSTINE ISLAND / AUGUSTINE	59.3392	-153.42	s_84AU-112 [2247]	BASALT [2247]	36.2217	-68.1663	50.4	0.5	12.5			10.35	11.64	11.5	0.16	0.36	1.82	0.05		66.6667	0.642216	1277.94	1.23753	1961.18	1.43308			111.207	4.48413					2997.5								4.95				1.16	0.12
[2216]	ALEUTIAN ARC	ALEUTIAN ARC / CENTRAL ALEUTIAN ARC / SEGUAM / SEGUAM / TURF POINT FORMATION	52.29	-172.31	s_J87-34 [2216]	BASALT [2216]	46.7409	-74.5474	49.7	0.59	19.2	1.75	4.93	6.50465	12.1	7.37	0.14	0.25	2.18	0.11	1.98	67.0995	0.881328	1168.86	0.808824	1151.59	0.938975									3537.05				48					322	7	10
[2216]	ALEUTIAN ARC	ALEUTIAN ARC / CENTRAL ALEUTIAN ARC / SEGUAM / SEGUAM / TURF POINT FORMATION	52.25	-172.25	s_B87-37 [2216]	BASALT [2216]	46.0557	-72.4756	51.1	0.8	18.5	6.95	0.41	6.66361	9.3	6.85	0.16	0.43	2.44	0.15	1.82	64.9166	1.0169	1167.54	0.718303	1060.21	0.846123									4796		190		75				9	334	5	61
[2225]	ALEUTIAN ARC	ALEUTIAN ARC / CENTRAL ALEUTIAN ARC / KANAGA	51.75	-177.33	s_LAB1 [2225]	BASALT [2225]	47.1188	-63.738	52.2	0.72	14.15			9.93	9.87	8.75	0.3	0.76	2.39		0.85	61.3318	1.07853	1259.51	1.12205	1624.91	1.16487									4316.4								17			43
[2256]	ALEUTIAN ARC	ALEUTIAN ARC / WESTERN ALEUTIAN ARC / ATTU	52.94	173.13	s_1-P/HO925B [2256]	BASALT [2256]	34.7682	-45.3221	49.37	0.96	18.67			8.84	6.81	9.96	0.13	0.8	3.78			66.9755	3.293	1233.4	1.395	1280.73	1.02273				1.3787				35	5755.2		269	43	103					313				0.18
[2256]	ALEUTIAN ARC	ALEUTIAN ARC / WESTERN ALEUTIAN ARC / ATTU	52.88	173.27	s_2-P/SB1A [2256]	BASALT [2256]	36.7916	-50.8444	49.7	1.46	15.49			8.94	11.47	8.52	0.12	0.23	3.82			63.1735	2.44813	1246.89	1.3898	1681.5	1.20777				1.57895				36	8752.7		408	44	185					183				0.19
[2256]	ALEUTIAN ARC	ALEUTIAN ARC / WESTERN ALEUTIAN ARC / ATTU	52.94	173.13	s_3-P/HO914B [2256]	BASALT [2256]	34.7682	-45.3221	49.04	1.53	18.45			8.6	10.3	8.24	0.18	0.2	3.38			63.2981	2.12192	1234.26	1.34708	1459.52	1.04282				2.29304				36	9172.35		363	41	187					229				0.28
[2256]	ALEUTIAN ARC	ALEUTIAN ARC / WESTERN ALEUTIAN ARC / ATTU	52.88	173.27	s_4-P/SB5A [2256]	BASALT [2256]	36.7916	-50.8444	51.4	1.64	15.31			9.03	8.17	8.79	0.21	0.76	3.37			63.6649	2.03058	1234.84	1.16118	1460.39	1.08941				2.09394				3	9831.8		407	38	153					206				0.36
[2548]	ALEUTIAN ARC	ALEUTIAN ARC / CENTRAL ALEUTIAN ARC / ADAK / MOUNT MOFFETT	51.92	-176.75	s_MM-78-E [2548]	CLINOPYROXENITE, XENOLITH [2548]	51.5903	-71.9032	46.65	1.3	13.44			10.31	11.01	13.18	0.14	0.86	2.22	0.1		69.7068	2.59901	1301.06	1.85945	1945.64	1.55561									7793.5
[2556]	ALEUTIAN ARC	ALEUTIAN ARC / CENTRAL ALEUTIAN ARC / KANAGA / KANATON	51.75	-177.33	s_18-1 [2556]	BASALT [2556]	47.1188	-63.738	52.2	0.72	14.15		9.93	9.93	9.87	8.75	0.3	0.76	2.39		0.85	61.3318	1.07853	1259.51	1.12205	1624.91	1.16487									4316.4	163							17	412		43
[14898]	ALEUTIAN ARC	ALEUTIAN ARC / ALASKA PENINSULA / AUGUSTINE ISLAND / AUGUSTINE	59.3392	-153.42	s_84AU-112 [14898]	BASALT [14898]	36.2217	-68.1663	52	0.56	13.37			8.69	11.67	11.27	0.17	0.33	1.87	0.07		70.0097	0.537778	1219.17	0.860773	1624.35	1.31597									3357.2
[14898]	ALEUTIAN ARC	ALEUTIAN ARC / ALASKA PENINSULA / AUGUSTINE ISLAND / AUGUSTINE	59.3416	-153.413	s_05AUNY-10 [14898]	BASALT [14898]	36.2217	-68.1663	52.0241	0.530659	12.4969			8.59116	12.3506	11.6888	0.170993	0.310864	1.74322	0.0926575		71.0063	0.467553	1216.82	0.814167	1685.85	1.38513									3181.3
[14898]	ALEUTIAN ARC	ALEUTIAN ARC / ALASKA PENINSULA / AUGUSTINE ISLAND / AUGUSTINE	59.3416	-153.413	s_05AUKB-02 [14898]	BASALT [14898]	36.2217	-68.1663	51.8219	0.584089	15.9719			8.03834	11.0448	7.81246	0.159048	0.348145	2.20287	0.1106		63.6287	0.737672	1205.23	0.811974	1372.51	1.04029									3501.62
[14898]	ALEUTIAN ARC	ALEUTIAN ARC / SECOND ALEUTIAN ARC / UNALASKA / MAKUSHIN	53.4917	-166.579	s_05EHPK-54 [14898]	NOT GIVEN [14898]	31.4315	-47.6386	52.2191	0.649284	14.0218			8.75414	10.8815	10.3094	0.173983	0.915959	2.28195	0.177277		67.9466	1.10928	1221.22	0.982377	1496.48	1.24482									3892.46
[14934]	ALEUTIAN ARC	ALEUTIAN ARC / ALASKA PENINSULA / UPPER ALASKA PENINSULA / KATMAI GROUP	58.3	-155.16	s_K0543 [14934]	BASALT [14934]	38.9235	-86.8794	50.41	0.69	14.03		10.13	10.13	10.12	11.43	0.17	0.5	2.02	0.09	0.2	67.0076	0.857004	1267.91	1.25301	1760.65	1.31961			143.519	3.08029	1.89051			45.1	4136.55								8	270	14.2	42	1.08	0.3
[2500]	ALEUTIAN ARC	ALEUTIAN ARC / SECOND ALEUTIAN ARC / UNALASKA / MAKUSHIN	53.67	-166.67	s_MK25 [2500]	BASALT [2500]	39.4211	-63.7293	51.18	0.63	15.25			8.81	9.84	10.55	0.15	1.06	2.6			68.3094	1.6376	1226.31	1.1409	1424.28	1.2071									3776.85
[2500]	ALEUTIAN ARC	ALEUTIAN ARC / SECOND ALEUTIAN ARC / UNALASKA / MAKUSHIN	53.67	-166.67	s_MK21 [2500]	BASALT [2500]	39.4211	-63.7293	49.97	0.77	15.64			9.55	10.22	9.97	0.16	0.92	2.26			65.2677	1.45085	1254.84	1.29886	1557.86	1.20357									4616.15
[2565]	ALEUTIAN ARC	ALEUTIAN ARC / CENTRAL ALEUTIAN ARC / SEGUAM / SEGUAM / TURF POINT FORMATION	52.27	-172.58	s_J87-63 [2565]	BASALT [2565]	48.3736	-80.4913	51.8	0.63	19	1.87	5.83	7.51263	11.3	6.55	0.14	0.3	2.05	0.11	-0.22	61.0798	0.627557	1192.58	0.80183	1204.64	0.887359									3776.85		55		35				6	298	7	42
[2565]	ALEUTIAN ARC	ALEUTIAN ARC / CENTRAL ALEUTIAN ARC / SEGUAM / SEGUAM / TURF POINT FORMATION	52.29	-172.31	s_B87-30 [2565]	BASALT [2565]	46.7409	-74.5474	52.9	0.67	19.6	0.84	5.48	6.23583	11.6	7.55	0.16	0.42	2.33	0.12	-0.03	68.5469	0.763889	1150.03	0.678314	1041.78	0.893618									4016.65		171		15				14	338	11	15
[2501]	ALEUTIAN ARC	ALEUTIAN ARC / CENTRAL ALEUTIAN ARC / KASATOCHI / KASATOCHI	52.17	-175.5	s_KAS7-1 [2501]	BASALT [2501]	57.3397	-99.2703	49.17	0.68	16.06			9.01	12.63	9.06	0.17	0.72	1.94	0.14		64.4127	1.14677	1246.87	1.2487	1596.35	1.21144									4076.6
[15080]	ALEUTIAN ARC	ALEUTIAN ARC / SECOND ALEUTIAN ARC / UMNAK / OKMOK	53.5	-168.17	s_OK1A [15080]	BASALT [15080]	50.2538	-99.2841	48.07	0.73	15.64	2.34	6.98	9.08553	10.76	12.68	0.15	0.48	2.14	0.12		71.5272	1.35393	1249.23	1.39499	1630.57	1.35444				4.80263				37.9	4376.35		698	51	272									0.06
[15080]	ALEUTIAN ARC	ALEUTIAN ARC / SECOND ALEUTIAN ARC / UMNAK / OKMOK	53.5	-168.17	s_OK4 [15080]	BASALT [15080]	50.2538	-99.2841	48.97	0.72	16.27	2.83	6.24	8.78643	12.86	9.62	0.01	0.54	2.11	0.13		66.3386	1.1763	1240.19	1.24436	1604.34	1.23716				3.32558				49.4	4316.4		608	45	98									0.32
[15080]	ALEUTIAN ARC	ALEUTIAN ARC / CENTRAL ALEUTIAN ARC / ADAK / ADAGDAK	51.83	-176.67	s_ADH [15080]	NOT GIVEN [15080]	46.1406	-59.236	48.46	0.69	15.14			9.03	11.37	11.83	0.14	0.74	2.12			70.2216	1.4981	1248.01	1.36047	1624.19	1.35104				4.46565				44.5	4136.55		614	41	219									1.05
[15080]	ALEUTIAN ARC	ALEUTIAN ARC / CENTRAL ALEUTIAN ARC / KANAGA / KANAGA	52	-177	s_KAN2 [15080]	NOT GIVEN [15080]	56.6624	-90.1689	50.28	0.75	16.1			8.74	9.99	11.19	0.13	0.58	2.57			69.7389	1.36298	1227.46	1.18022	1469.01	1.21281				3.17978				40.3	4496.25		946	43	222									0.25
[2572]	ALEUTIAN ARC	ALEUTIAN ARC / ALASKA PENINSULA / KODIAK / GHOST ROCKS FORMATION	57.17	-153.5	s_15-2E [2572]	GREENSTONE [2572]	7.7111	-24.6259	52.14	0.91	15.41	7.74		6.96445	7.08	7.42	0.12	0.27	4.1	0.14	3.92	65.7269	2.08938	1173.09	0.744528	1154.51	0.928703				2.5641				30.3	5455.45			28.5					7	142	5	86		0.22
[4059]	ALEUTIAN ARC	ALEUTIAN ARC / ALASKA PENINSULA / KRUZOF / MOUNT EDGECUMBE	57.17	-135.67	s_734A [4059]	BASALT, OLIVINE [4059]			48	0.79	17.3	2.1	6.5	8.38958	11	9.6	0.17	0.13	2.5	0.13		67.317	1.38338	1229.17	1.22384	1495.5	1.14074									4736.05
[4059]	ALEUTIAN ARC	ALEUTIAN ARC / ALASKA PENINSULA / KRUZOF / MOUNT EDGECUMBE	57.17	-135.67	s_720 [4059]	BASALT, PLAGIOCLASE [4059]			50	1.1	17.4	2.3	6.2	8.26954	10.8	7.1	0.18	0.2	3.4	0.3		60.7139	1.85143	1224.92	1.16812	1435.86	1.01838									6594.5
[15080]	ALEUTIAN ARC	ALEUTIAN ARC / CENTRAL ALEUTIAN ARC / KASATOCHI / KASATOCHI	52.17	-175.5	s_KAS7A [15080]	BASALT [15080]	57.3397	-99.2703	49.07	0.66	15.75			8.82	12.52	8.77	0.14	0.76	2.24	0.15		64.1551	1.4827	1243.58	1.25203	1580.22	1.21077				3.6443				44.7	3956.7		338	41	61				12	482				0.56
[2224][2209]	ALEUTIAN ARC	ALEUTIAN ARC / SECOND ALEUTIAN ARC / AKUTAN / AKUTAN / HOT SPRINGS BAY VOLCANICS	54.08	-165.92	s_AK4-3 [2224]	BASALT [2224]	41.7071	-74.6357	45.66	0.75	14.45			11.17	13.27	12.87	0.16	0.29	1.52			67.4685	1.23162	1337.5	2.06868	2213.09	1.58833			104.575	3.30303	1.96212				4496.25	420	144		106				3	249	15	19	1.53	0.67
[2211]	ALEUTIAN ARC	ALEUTIAN ARC / SECOND ALEUTIAN ARC / UNALASKA	53.67	-166.67	s_189H [2211]	GABBRO [2211]	39.4211	-63.7293	48.41	0.21	22.13			6.55	13.2	8.23	0.06	0.12	1.18	0.25		69.3409	0.312384	1171.42	0.85577	1116.38	0.912155				5.5122	1.67073				1258.95								3	640	5	22
[2195][2563]	ALEUTIAN ARC	ALEUTIAN ARC / CENTRAL ALEUTIAN ARC / ADAK / ADAGDAK	51.83	-176.67	s_ADAG-81DR [2195]	BASALT [2195]	46.1406	-59.236	48.46	0.69	15.14		9.03	9.03	11.37	11.83	0.21	0.74	2.08			70.2216	1.45648	1247.93	1.35795	1622.07	1.3497				0.769231				88	4136.55		3700		233				0	31				0.1
[14898]	ALEUTIAN ARC	ALEUTIAN ARC / ALASKA PENINSULA / AUGUSTINE ISLAND / AUGUSTINE	59.3416	-153.413	s_05AUNY-17 [14898]	BASALT [14898]	36.2217	-68.1663	51.6147	0.531795	12.55			8.8139	12.1309	12.0266	0.174883	0.296948	1.7705	0.0897572		71.0657	0.49617	1224.88	0.885799	1722.77	1.40563									3188.11
[14898]	ALEUTIAN ARC	ALEUTIAN ARC / CENTRAL ALEUTIAN ARC / SEGUAM	52.3082	-172.486	s_SEG-0706 [14898]	NOT GIVEN [14898]	47.8919	-78.5431	50.21	0.63	19.19			7.54942	10.73	6.65	0.14	0.4	2.28	0.07		61.3235	0.996172	1199.82	0.927915	1203.47	0.891235									3776.85
[2216]	ALEUTIAN ARC	ALEUTIAN ARC / CENTRAL ALEUTIAN ARC / SEGUAM / SEGUAM / TURF POINT FORMATION	52.25	-172.25	s_B87-29 [2216]	BASALT [2216]	46.0557	-72.4756	51.5	0.67	18.3	2.5	4.79	7.0395	11.3	7.14	0.14	0.24	2.07	0.14	1.38	64.6105	0.627776	1177.01	0.724318	1183.65	0.921681									4016.65		123						8	334	13	11
[2216]	ALEUTIAN ARC	ALEUTIAN ARC / CENTRAL ALEUTIAN ARC / SEGUAM / SEGUAM / TURF POINT FORMATION	52.25	-172.25	s_B87-32 [2216]	BASALT [2216]	46.0557	-72.4756	51.1	0.63	20.8	0.56	6.4	6.90389	11.7	6.63	0.2	0.19	2.26	0.13	-0.11	63.3511	0.741049	1176.65	0.838601	1116.38	0.851117				2.06364	1.8				3776.85		113		98				7.44	322	12.3	32
[4867][7197]	ALEUTIAN ARC	ALEUTIAN ARC / SECOND ALEUTIAN ARC / UNIMAK / SHISHALDIN	54.75	-163.97	s_SH-15 [4867] / s_SH 15 [7197]	BASALT [4867]	46.3759	-98.7761	48.7	1.18	15.26			9.72	10.95	8.53	0.16	0.71	2.61	0.18	-0.05	61.2347	1.93375	1273.79	1.45453	1708.08	1.20395			78.1818	4.78261	1.90761				7074.1	300	328	36	96				13	493	18.5	87	3.3	0.6
[2206]	ALEUTIAN ARC	ALEUTIAN ARC / CENTRAL ALEUTIAN ARC / ADAK	51.92	-176.75	s_HB7-10 [2206]	GABBRO [2206]	51.5903	-71.9032	50.43	1.19	18.07			8.32	10.91	7.34	0.1	0.89	2.63	0.2		61.3598	1.66762	1221.95	1.15607	1329.96	1.0018				7.2327	2.08805				7134.05								28
[2214][23819][14905][2213]	ALEUTIAN ARC	ALEUTIAN ARC / SECOND ALEUTIAN ARC / UMNAK / OKMOK	53.42	-167.85	s_UM10 [2214] / s_UM 10 [14905]	THOLEIITE [2214] / BASALT [23819] / BASALT, OLIVINE [2213]	47.2963	-75.4158	51.3	0.68	16.2			8.3	11.32	7.45	0.15	0.61	2.22	0.13		61.7688	0.964928	1217.76	0.93653	1397.01	1.04568				4.85075	1.83582	4.83112			4076.6								8.07	557	10	85
[23853][20231]	ALEUTIAN ARC	ALEUTIAN ARC / SECOND ALEUTIAN ARC / UNIMAK / WESTDAHL	54.53	-164.69	s_SAR-17 [23853]	NOT GIVEN [23853]	43.4703	-86.029	49.3884	0.362719	18.3312			8.98	10.9438	9.51676	0.179208	0.100266	1.54231	0.0545002	-0.0919963	65.6073	0.422337	1236.62	1.09143	1466.83	1.06951			294.545	0.612865	1.50526				2174.5								2.2	109	7.8	15.1	0.11	0.0962
[2238][2578]	ALEUTIAN ARC	ALEUTIAN ARC / SECOND ALEUTIAN ARC / UMNAK / OKMOK	53.37	-168.03	s_ID16 [2238]	THOLEIITE [2238]	48.2565	-81.5063	48.94	0.7	16.01	1.06	7.95	8.90379	10.89	11.42	0.17	0.52	2.21	0.12	-0.33	69.7765	1.2547	1239.84	1.27892	1560.26	1.26893			79.6552	5.46154				36.4	4196.5		662	48.5	266				6.35	501	16	60	2.9	0.516
[2238]	ALEUTIAN ARC	ALEUTIAN ARC / SECOND ALEUTIAN ARC / UMNAK / OKMOK	53.37	-168.03	s_ID18 [2238]	THOLEIITE [2238]	48.2565	-81.5063	49.16	0.87	17	1.13	8.5	9.51677	12.38	8.05	0.18	0.41	2.2	0.12	-0.34	60.358	1.10586	1264.12	1.35425	1659.76	1.14004			50.3226	3.26667				43.3	5215.65		231	43.9	60				5.56	440	16	49	3.1	0.184
[2238]	ALEUTIAN ARC	ALEUTIAN ARC / SECOND ALEUTIAN ARC / UMNAK / OKMOK	53.37	-168.03	s_ID25 [2238]	THOLEIITE [2238]	48.2565	-81.5063	49.33	0.64	17.61	0.99	7.4	8.2908	12.22	8.62	0.16	0.5	2.43	0.11	-0.34	65.1747	1.35622	1223.88	1.17976	1438.74	1.11364			71.25	2.86667				42.4	3836.8		306	42.7	87				8.62	482	13	45	2.4	0.295
[15080][2239]	ALEUTIAN ARC	ALEUTIAN ARC / WESTERN ALEUTIAN ARC / ATTU	52.83	173.18	s_SB80-1A [15080]	BASALT [15080]	33.067	-41.7698	49.7	1.46	15.49			8.94	11.47	8.52	0.12	0.23	3.82	0.13		63.1735	2.44813	1246.89	1.3898	1681.5	1.20777				1.57895				36.2	8752.7		408	408	185				4.9	183				0.19
[2500][2209][15080]	ALEUTIAN ARC	ALEUTIAN ARC / SECOND ALEUTIAN ARC / UNALASKA / MAKUSHIN	53.67	-166.67	s_MK15 [2500] / s_MK-15 [2209]	BASALT [2500]	39.4211	-63.7293	51.2	0.75	15.69			9.21	10.12	9.64	0.16	0.42	2.77	0.21		65.3264	1.24099	1239.08	1.14693	1544	1.16215				4.72258	1.80645				4496.25		255		66				11	533				0.82
[2500][2209]	ALEUTIAN ARC	ALEUTIAN ARC / SECOND ALEUTIAN ARC / UNALASKA / MAKUSHIN	53.67	-166.67	s_MK7 [2500] / s_MK-7 [2209]	BASALT [2500]	39.4211	-63.7293	50.85	0.6	14.24			8.77	11.12	10.98	0.16	0.8	2.44			69.2647	1.33727	1228.89	1.12047	1551.34	1.30038
[6312]	SCOTIA ARC	SCOTIA ARC / SOUTH SHETLAND ISLANDS / KING GEORGE ISLAND / MELVILLE PEAK	-62.05	-58.4	s_MP405 [6312]	ANDESITE, BASALTIC [6312]			52.8	0.92	16.7			7.1	11.3	7.1	0.14	0.91	3.1	0.14		64.2857	1.64083	1179.27	0.856649	1196.66	1.00064	5.92857	0.705357	115.333					42	5515.4	249	157		41	79	55	18	17	598	21	112	1.5
[6312]	SCOTIA ARC	SCOTIA ARC / SOUTH SHETLAND ISLANDS / KING GEORGE ISLAND / MELVILLE PEAK	-62.05	-58.4	s_MP375 [6312]	ANDESITE, BASALTIC [6312]			53	0.96	16.8			7	11.1	7	0.13	0.88	3.4	0.13		64.2857	1.83184	1176.55	0.86764	1181.54	0.99064	5.35417	0.925926	126.667					48	5755.2	257	172		50	100	54	19	17	562	19	108	0.9
[16169]	SCOTIA ARC	SCOTIA ARC / SOUTH SHETLAND ISLANDS / ROBERT ISLAND	-62.3667	-59.7167	s_P.841.12 [16169]	NOT GIVEN [16169]			50.4	0.63	17.38	8.39		7.4671	10.91	7.99	0.14	0.6	2.26	0.12	1.22	65.8242	1.10535	1193.04	0.893247	1247.4	1.00867	6.30213	0.86907	156.457	6.20596	1.84894	4.676		42.9903	3776.85	270.93	347.343	42.6184	97.4904	43.5295	66.0003		7.92709	699.345	11.0705	50.0874	0.995311	0.120453
[16169]	SCOTIA ARC	SCOTIA ARC / SOUTH SHETLAND ISLANDS / KING GEORGE ISLAND	-62.1667	-58.95	s_P.1128.1 [16169]	NOT GIVEN [16169]			47.78	0.42	20.03	7.76		6.9064	11.86	6.88	0.14	0.31	2.04	0.09	2.98	64.1977	1.15533	1189.42	0.971738	1175.31	0.910177	6.49544	1.52089	140.11	6.27751	1.87635	3.93786		34.4216	2517.9	223.584	101.813	46.8296	47.3698	80.4578	63.3861		1.91384	704.053	9.41106	52.9017	0.729018	0.0612536
[6312]	SCOTIA ARC	SCOTIA ARC / SOUTH SHETLAND ISLANDS / KING GEORGE ISLAND / MELVILLE PEAK	-62.05	-58.4	s_MP372 [6312]	ANDESITE, BASALTIC [6312]			52.5	1.01	16.3			7.1	10.2	8.8	0.13	0.8	3.2	0.14		69.0497	1.68421	1175.77	0.869037	1203.11	1.05647	6.5	0.842593	39.3871	5.05556	1.55556			38	6054.95	247	330		136	91	56	15	11.6	499.9	19	108	3.1	0.35
[16169]	SCOTIA ARC	SCOTIA ARC / SOUTH SHETLAND ISLANDS / KING GEORGE ISLAND	-62.1333	-58.1167	s_P.2770.4 [16169]	NOT GIVEN [16169]			51.05	0.68	16.61	8.28		7.3692	9.46	9.37	0.15	0.39	2.85	0.11	1.53	69.593	1.30405	1185.11	0.869311	1242.47	1.05011	6.5263	1.25723	128.45	4.60226	1.68623	10.7909		40.4051	4076.6	263.696	658.026	48.481	286.776	83.9663	71.2878		4.82659	393.347	15.1898	66.7869	1.2512	4.30453
[16169]	SCOTIA ARC	SCOTIA ARC / SOUTH SHETLAND ISLANDS / ROBERT ISLAND	-62.3667	-59.7167	s_P.840.3 [16169]	NOT GIVEN [16169]			48.15	0.63	17.13	8.67		7.7163	11.19	8.52	0.14	0.28	1.97	0.11	3.49	66.527	0.98301	1208.43	0.985087	1372.35	1.066	6.89586	1.37618	162.944	6.41206	1.85286	3.52375		29.6167	3776.85	204.232	310.346	38.039	137.427	59.7656	61.2816		1.24082	616.754	10.5537	43.4285	0.922689	0.0247728
[6312]	SCOTIA ARC	SCOTIA ARC / SOUTH SHETLAND ISLANDS / KING GEORGE ISLAND	-62.05	-58.4	s_LH1 [6312]	BASALT, OLIVINE [6312]			50.3	0.82	16.9			8.4	11.4	7.5	0.14	0.23	2.5	0.17		61.6438	1.02095	1224.59	1.03316	1460.13	1.04419	6.90909	1.10667	179.4	3.13333	1.86667			33	4915.9	228	734		240	83	76	18	3.3	373.2	19	75	0.5	1.75
[16169]	SCOTIA ARC	SCOTIA ARC / SOUTH SHETLAND ISLANDS / ROBERT ISLAND	-62.3667	-59.7167	s_P.1607.1 [16169]	NOT GIVEN [16169]			49.87	0.86	16.35	9.19		8.1791	9.42	8.23	0.15	0.44	2.74	0.33	3.1	64.428	1.47197	1216.3	1.01574	1365.78	1.03734	7.04682	0.249092	63.5465	7.92759	2.04386	5.30556		29.3579	5155.7	206.88	215.446	33.1994	74.9807	19.4312	73.0049		3.47149	546.98	15.6058	78.0081	3.12187	0.0310496
[16169]	SCOTIA ARC	SCOTIA ARC / SOUTH SHETLAND ISLANDS / ROBERT ISLAND	-62.3667	-59.7167	s_P.841.7 [16169]	NOT GIVEN [16169]			46.52	0.77	15.83	9.25		8.2325	10.56	8.76	0.15	0.39	2.91	0.18	5.21	65.6986	3.09375	1236.76	1.31631	1523.15	1.16797	7.11824	1.55176	148.476	7.60379	2.20844	20.1368		34.3416	4616.15	244.452	427.088	43.2222	111.307	65.0386	61.4372		7.41173	565.921	11.657	41.9127	1.46541	1.48757
[16169]	SCOTIA ARC	SCOTIA ARC / SOUTH SHETLAND ISLANDS / ROBERT ISLAND	-62.3667	-59.7167	s_P.1484.1 [16169]	NOT GIVEN [16169]			50.81	0.71	16.33	8.39		7.4671	11.43	7.32	0.17	0.88	2.2	0.17	1.65	63.8276	1.21465	1195.58	0.871427	1268.76	1.02713	7.2834	1.04063	291.225	14.0595	2.10927	5.43962		34.3699	4256.45	250.329	222.616	31.8339	45.359	68.035	72.247		10.0036	787.719	13.4559	65.3786	1.2516	0.0822456
[16169]	SCOTIA ARC	SCOTIA ARC / SOUTH SHETLAND ISLANDS / ROBERT ISLAND	-62.3667	-59.7167	s_P.1492.2 [16169]	NOT GIVEN [16169]			50.02	0.7	16.84	8.83		7.8587	11.74	7.66	0.14	0.18	1.99	0.11	1.9	63.6956	0.670783	1207.28	0.875836	1397.14	1.03546	7.39328	1.89932	121.326	5.02786	1.82968	3.94154		33.8877	4196.5	250.541	257.859	33.502	89.435	73.1974	60.0327		3.51607	568.93	11.0882	38.5388	0.763843	0.327498
[16169]	SCOTIA ARC	SCOTIA ARC / SOUTH SHETLAND ISLANDS / LIVINGSTON ISLAND	-62.5167	-60.0667	s_P.1817.1 [16169]	NOT GIVEN [16169]			50.07	0.64	17.26	8.49		7.5561	10.18	9.23	0.15	0.25	2.41	0.06	1.23	68.7378	1.00079	1194.11	0.908247	1289.35	1.04746	7.60728	1.20328	121.494	1.16708	1.58567	7.33766		29.2684	3836.8	222.653	393.786	37.2231	173.08	40.2009	72.5507		4.55012	297.564	16.2975	33.4094	0.637428	0.43484
[7505]	SCOTIA ARC	SCOTIA ARC / SOUTH SHETLAND ISLANDS / ROBERT ISLAND	-62.35	-59.6	s_96022302 [7505]	BASALT [7505]			49.25	0.63	18.09			8.18	12.85	8.16	0.16	0.11	1.93	0.12	0.74	64.2295	0.665856	1219.95	1.04796	1462.67	1.07251	7.94118	4.15	73					34	3776.85	270	248	52	64	83	61	18	2	636	10	20	1
[6312]	SCOTIA ARC	SCOTIA ARC / SOUTH SHETLAND ISLANDS / PENGUIN ISLAND	-62.06	-57.56	s_P263 [6312]	BASALT [6312]			49.8	1.16	15.6			8.7	9.9	11	0.16	0.58	3.3	0.29		69.4737	2.21388	1231.91	1.31955	1520.17	1.24846	8.29412	1.37349	37.1875					34	6954.2	282	548		207	114	70	17	8	541	16	83	3.2
[6312]	SCOTIA ARC	SCOTIA ARC / SOUTH SHETLAND ISLANDS / PENGUIN ISLAND	-62.06	-57.56	s_P260 [6312]	BASALT [6312]			50.8	1.15	16.4			8.3	10.7	9.1	0.15	0.52	3.5	0.24		66.3695	2.07185	1217.73	1.19284	1440.42	1.14069	8.30303	1.35366	56.3636					33	6894.25	274	441		140	111	65	23	7	527	15	82	2.2
[8787]	SCOTIA ARC	SCOTIA ARC / SOUTH SHETLAND ISLANDS / LIVINGSTON ISLAND	-62.58	-60	s_LI-12B [8787]	NOT GIVEN [8787]			50.54	1.1	17.03			9.57	9.65	8.01	0.18	0.19	2.88	0.23	0.87	60.1051	1.24999	1256.21	1.24286	1566.47	1.04568	8.39286	0.364583	33.4615					28	6594.5	235	366	62	161	35	70	16	3	369	23	96	2.6
[6312]	SCOTIA ARC	SCOTIA ARC / SOUTH SHETLAND ISLANDS / PENGUIN ISLAND	-62.06	-57.56	s_P261 [6312]	BASALT [6312]			49.1	1.25	15.9			8.6	10.1	9.8	0.16	0.61	3.7	0.28		67.2256	3.04526	1234.22	1.39738	1512.98	1.20871	8.78788	0.840909	33.125	8.08333	2.25			33	7493.75	290	377		160	74	69	19	5.3	581.9	14	88	3.2	0.05
[16169]	SCOTIA ARC	SCOTIA ARC / SOUTH SHETLAND ISLANDS / LIVINGSTON ISLAND	-62.5167	-60.0667	s_P.1820.5 [16169]	NOT GIVEN [16169]			47.98	1.1	16.35	9.88		8.7932	10.94	10.15	0.15	0.38	2.92	0.26	0.1	67.5086	2.18675	1243.49	1.40726	1587.47	1.22982	8.81969	2.07942	45.5851	5.11581	1.87321	6.24457		32.4087	6594.5	285.834	469.11	40.8893	149.819	88.6021	74.4328		5.15185	479.993	14.78	42.609	2.3925	0.15104
[16169]	SCOTIA ARC	SCOTIA ARC / SOUTH SHETLAND ISLANDS / LIVINGSTON ISLAND	-62.5167	-60.0667	s_P.1818.10 [16169]	NOT GIVEN [16169]			47.79	1.3	16.84	9.95		8.8555	11.44	8.16	0.15	0.57	3.36	0.3	-0.36	62.3866	3.22441	1254.03	1.53072	1586.26	1.15886	9.19547	1.29864	47.3156	8.80443	2.06977	6.52273		33.5958	7793.5	308.929	264.086	36.6223	84.3226	96.5778	81.7972		10.0445	545.41	16.5524	74.3686	3.82699	0.17171
[7505]	SCOTIA ARC	SCOTIA ARC / SOUTH SHETLAND ISLANDS / ROBERT ISLAND	-62.35	-59.6	s_96022001 [7505]	BASALT [7505]			49.31	0.89	17.5			9.6	10.82	8	0.17	0.21	2.51	0.15	1.08	60	1.17249	1264.29	1.33921	1607.71	1.0736	9.64286	1.71429	122					28	5335.55	270	329	47	100	72	65	19	3	482	16	42	1
[6312]	SCOTIA ARC	SCOTIA ARC / SOUTH SHETLAND ISLANDS / PENGUIN ISLAND	-62.06	-57.56	s_P174 [6312]	BASALT [6312]			50.6	1.3	17.2			8.7	10.2	7.9	0.16	0.66	4	0.29		62.0419	2.85732	1234.41	1.35861	1441.16	1.07582	9.72414	1.71111	78.4545		2.15385			29	7793.5	282	218		95	154	71	22	6.3	639.5	16	90	2.2	0.13
[16169]	SCOTIA ARC	SCOTIA ARC / SOUTH SHETLAND ISLANDS / PENGUIN ISLAND	-62.1	-57.9333	s_P.810.3 [16169]	NOT GIVEN [16169]			48.34	1.19	15.56	9.74		8.6686	9.9	10.99	0.16	0.57	3.1	0.26		69.531	2.52227	1238.36	1.38887	1547.08	1.26297	9.74777	1.07842	51.2769	7.65659	2.16165	5.35229		29.7793	7134.05	290.281	492.729	46.2416	233.32	75.3254	80.9195		6.82122	568.458	15.4937	69.8483	3.21877	0.139883
[8787]	SCOTIA ARC	SCOTIA ARC / SOUTH SHETLAND ISLANDS / ROBERT ISLAND	-62.35	-59.6	s_RO-5 [8787]	NOT GIVEN [8787]			49.31	0.89	17.5			9.6	10.82	8	0.17	0.21	2.51	0.15	1.08	60	1.17249	1264.29	1.33921	1607.71	1.0736	9.81818	1.73494	174.286					27.5	5335.55	270	329	47	100	72	65	18.5	3	482	16	41.5	0.7
[2191]	SCOTIA ARC	SCOTIA ARC / SOUTH SHETLAND ISLANDS / PENGUIN ISLAND	-62.06	-57.56	s_11 [2191]	BASALT [2191]			48.87	1.23	15.44			9.53	10.1	9.07	0.19	0.53	3.74	0.3		63.142	3.10612	1267.02	1.55982	1678.11	1.21881			93						7373.85		508		163		82	22	5	550	12	80	2
[6190]	SCOTIA ARC	SCOTIA ARC / SOUTH SHETLAND ISLANDS / KING GEORGE ISLAND	-62.05	-58.4	s_P615.1 [6190]	BASALT [6190]			47.97	0.51	20.06			7.66	12.7	6.82	0.13	0.58	2.04	0.11	0.95	61.577	1.38117	1214.61	1.16128	1277.41	0.960071									3057.45	212	79		37	95	56	18
[6647]	SCOTIA ARC	SCOTIA ARC / SOUTH SHETLAND ISLANDS / LIVINGSTON ISLAND	-62.58	-60	s_1 [6647]	BASALT [6647]			48.3	1.07	15.5	2.36	7.85	9.97353	10.5	9.6	0.2	0.24	2.5	0.22		63.4046	1.41653	1278.67	1.46025	1782.95	1.22952			23.6667						6414.65		256		84				2	350	18	69	3
[6678]	SCOTIA ARC	SCOTIA ARC / SOUTH SHETLAND ISLANDS / NELSON ISLAND	-62.5	-59	s_P.1219.1 [6678]	BASALT [6678]			49.7	0.66	17.4	2.38	5.96	8.10152	12.03	8.2	0.14	0.4	2.15	0.11		64.5626	0.970522	1216.11	1.03632	1410.08	1.07357									3956.7		120		30		59	21		489	13	67
[6678]	SCOTIA ARC	SCOTIA ARC / SOUTH SHETLAND ISLANDS / NELSON ISLAND	-62.5	-59	s_P.1214.1 [6678]	BASALT [6678]			51.2	0.6	18.6	2.4	6.01	8.16952	10.06	9.2	0.15	0.58	1.88	0.09		66.9645	0.738	1203.97	0.939961	1248.21	0.998293									3597		80		26		49	21	7	513	13	58
[6678]	SCOTIA ARC	SCOTIA ARC / SOUTH SHETLAND ISLANDS / ROBERT ISLAND / COPPERMINE FORMATION	-62.35	-59.6	s_P.840.3 [6678]	BASALT [6678]			49.8	0.67	17.1	2.46	6.14	8.35351	11.39	9.8	0.14	0.34	2.24	0.12		67.8631	0.978882	1218.87	1.08917	1446.58	1.14272									4016.65		360		142		54	20		670	10	58
[6678]	SCOTIA ARC	SCOTIA ARC / SOUTH SHETLAND ISLANDS / ROBERT ISLAND / COPPERMINE FORMATION	-62.35	-59.6	s_P.841.12 [6678]	BASALT [6678]			51.5	0.66	18.4	2.37	5.94	8.07253	11.03	7.9	0.14	0.69	2.73	0.11		63.7882	1.37605	1208.02	1.05107	1276.97	1.00092									3956.7		246		83		56	20	6	675	10	59
[6678]	SCOTIA ARC	SCOTIA ARC / SOUTH SHETLAND ISLANDS / ROBERT ISLAND / COPPERMINE FORMATION	-62.35	-59.6	s_P.1607.1 [6678]	BASALT [6678]			50.8	0.88	14.4	2.56	6.41	8.71349	9.05	12.2	0.16	0.49	2.73	0.37		71.5928	1.32928	1223.12	1.09306	1514.91	1.28203			68.6667						5275.6		210		70		66	21		545	16	108	3
[6678]	SCOTIA ARC	SCOTIA ARC / SOUTH SHETLAND ISLANDS / ROBERT ISLAND / COPPERMINE FORMATION	-62.35	-59.6	s_P.1494.2 [6678]	BASALT [6678]			51.8	1.07	17.6	2.6	6.51	8.84948	10.55	8.3	0.16	0.71	2.56	0.34		62.8009	1.2151	1227.49	1.11476	1392	1.04053									6414.65		210		72		74	21	10	621	19	127
[6678]	SCOTIA ARC	SCOTIA ARC / SOUTH SHETLAND ISLANDS / ROBERT ISLAND / COPPERMINE FORMATION	-62.35	-59.6	s_P.1492.2 [6678]	BASALT [6678]			50.9	0.75	16.9	2.46	6.16	8.37351	12.06	8.3	0.15	0.21	2.3	0.02		64.083	0.797481	1218.58	0.993389	1471.65	1.08938									4496.25		290		84		58	18	3	555	11	57
[6678]	SCOTIA ARC	SCOTIA ARC / SOUTH SHETLAND ISLANDS / ROBERT ISLAND / COPPERMINE FORMATION	-62.35	-59.6	s_P.1484.1 [6678]	BASALT [6678]			52.1	0.76	17.5	2.36	5.9	8.02353	11.31	7.5	0.17	1	2.65	0.15		62.7221	1.46401	1206.19	1.01209	1272.14	1.01535			0						4556.2		200		46		65	18	9	737	12	89	4
[6678]	SCOTIA ARC	SCOTIA ARC / SOUTH SHETLAND ISLANDS / ROBERT ISLAND / COPPERMINE FORMATION	-62.35	-59.6	s_P.841.2 [6678]	BASALT [6678]			47.9	0.86	13.9	2.67	6.68	9.08247	9.66	11.7	0.15	0.63	2.03	0.26		69.8682	1.444	1251.29	1.26326	1650.77	1.33405			66.25						5155.7		360		130		54	22	10	540	14	72	4
[6678]	SCOTIA ARC	SCOTIA ARC / SOUTH SHETLAND ISLANDS / ROBERT ISLAND / COPPERMINE FORMATION	-62.35	-59.6	s_P.841.7 [6678]	BASALT [6678]			47.5	0.75	14.1	2.57	6.43	8.74249	9.93	12.2	0.15	0.52	2.76	0.2		71.5252	2.39076	1244.94	1.38115	1635.78	1.38029									4496.25		360		112		52	21	7	582	12	79
[6678]	SCOTIA ARC	SCOTIA ARC / SOUTH SHETLAND ISLANDS / ROBERT ISLAND / COPPERMINE FORMATION	-62.35	-59.6	s_P.843.1 [6678]	BASALT [6678]			49.2	0.91	15.5	2.64	6.59	8.96547	10.08	10.2	0.16	0.33	2.42	0.14		67.1901	1.21976	1239.95	1.18214	1576.25	1.20039									5455.45		291		88		59	23		475	15	56
[6678]	SCOTIA ARC	SCOTIA ARC / SOUTH SHETLAND ISLANDS / NELSON ISLAND / FILDES FORMATION	-62.5	-59	s_P.1198.5 [6678]	BASALT [6678]			51.7	0.8	16.2	2.39	5.98	8.13052	9.79	8.3	0.15	0.51	3.04	0.14		64.758	1.44856	1207.66	0.963028	1342.27	1.04745									4796		30		15		64	25	7	527	13	61
[6678]	SCOTIA ARC	SCOTIA ARC / SOUTH SHETLAND ISLANDS / KING GEORGE ISLAND / FILDES FORMATION	-62.05	-58.4	s_P.662.1 [6678]	ANDESITE, BASALTIC [6678]			52.4	0.74	15.7	2.23	5.57	7.57655	7.51	6.7	0.15	1.44	2.68	0.2		61.4161	1.80579	1192.36	0.780972	1087.24	0.89715									4436.3						63	24	16	686	14
[6678]	SCOTIA ARC	SCOTIA ARC / SOUTH SHETLAND ISLANDS / KING GEORGE ISLAND / FILDES FORMATION	-62.05	-58.4	s_P.683.4 [6678]	BASALT [6678]			47.5	0.71	16.9	2.51	6.29	8.5485	9.9	8.5	0.21	0.53	3.02	0.11		64.155	2.80056	1241.01	1.35217	1451.51	1.09836									4256.45		30		22		57	24	7	715	14	63
[6678]	SCOTIA ARC	SCOTIA ARC / SOUTH SHETLAND ISLANDS / KING GEORGE ISLAND / FILDES FORMATION	-62.05	-58.4	s_P.1440.1 [6678]	BASALT [6678]			47.8	0.61	20.3	2.46	6.16	8.37351	10.52	7.6	0.15	0.43	2.85	0.09		62.0309	2.24133	1234.52	1.3724	1314.03	0.958336									3656.95		40		20		57	22		618	10	64
[6678]	SCOTIA ARC	SCOTIA ARC / SOUTH SHETLAND ISLANDS / KING GEORGE ISLAND / FILDES FORMATION	-62.05	-58.4	s_P.1481.1 [6678]	BASALT [6678]			47.3	0.76	16.3	2.56	6.4	8.70349	12.32	9.78	0.12	0.45	1.37	0.1		66.9163	0.770326	1242.18	1.19496	1602.26	1.21933			44.25						4556.2		20		29		70	21	4	645	10	87	4
[6678]	SCOTIA ARC	SCOTIA ARC / SOUTH SHETLAND ISLANDS / KING GEORGE ISLAND / FILDES FORMATION	-62.05	-58.4	s_P.1473.4 [6678]	BASALT [6678]			50.9	0.72	19.7	2.29	5.73	7.79054	10.49	7.1	0.14	0.53	2.82	0.12		62.1277	1.42057	1203.35	1.04419	1202.93	0.909613									4316.4		21		10		68	25	4	626	10	72
[6678]	SCOTIA ARC	SCOTIA ARC / SOUTH SHETLAND ISLANDS / KING GEORGE ISLAND / FILDES FORMATION	-62.05	-58.4	s_P.1472.7 [6678]	BASALT [6678]			45.1	0.51	19.5	2.1	5.25	7.13958	13.78	8.5	0.11	0.19	1.49	0.07		68.1831	1.344	1208.23	1.15836	1374.41	1.08266									3057.45		30		17		44	21	3	558	7	54
[6678]	SCOTIA ARC	SCOTIA ARC / SOUTH SHETLAND ISLANDS / NELSON ISLAND / FILDES FORMATION	-62.5	-59	s_P.1195.9 [6678]	BASALT [6678]			50	1.09	15.3	2.71	6.77	9.20846	8.54	8.7	0.18	0.35	3.03	0.17		62.9713	1.63206	1247.13	1.16917	1546.1	1.09771			40.8						6534.55		150		67		72	19		486	24	118	5
[6678]	SCOTIA ARC	SCOTIA ARC / SOUTH SHETLAND ISLANDS / KING GEORGE ISLAND / FILDES FORMATION	-62.05	-58.4	s_P.1416.1 [6678]	BASALT [6678]			48.9	0.96	15.8	2.71	6.78	9.21846	9.78	9.3	0.25	0.24	2.61	0.23		64.4877	1.37669	1251.06	1.2486	1602.29	1.15168			49.6667						5755.2		62		36		68	29		834	14	74	3
[6678]	SCOTIA ARC	SCOTIA ARC / SOUTH SHETLAND ISLANDS / KING GEORGE ISLAND / HENNEQUIN FORMATION	-62.05	-58.4	s_P.1463.1 [6678]	BASALT [6678]			49.8	0.79	15.3	2.44	6.11	8.30551	9.39	7.4	0.15	0.2	2.67	0.2		61.5939	1.21131	1223.63	0.936549	1442.05	1.0256									4736.05		30		18		61	23		707	18	122
[8753]	SCOTIA ARC	SCOTIA ARC / SOUTH SHETLAND ISLANDS / LIVINGSTON ISLAND	-62.65	-60.25	s_230 [8753]	BASALT [8753]			46.64	0.99	16.21			9.28	10.7	11.42	0.17	0.34	2.92	0.18	-0.38	68.8966	2.91967	1266.45	1.66115	1690.95	1.32139			42.5						5935.05	287	594		216				7	418	14	53	2
[8753]	SCOTIA ARC	SCOTIA ARC / SOUTH SHETLAND ISLANDS / LIVINGSTON ISLAND	-62.56	-60.13	s_260 [8753]	BASALT [8753]			47.4	1.15	16.16			9.46	10.37	10.96	0.17	0.46	3.2	0.21	-0.5	67.5894	3.04445	1268.47	1.67178	1681.33	1.29481			21						6894.25	288	443		193				10	536	17	57	6
[8753]	SCOTIA ARC	SCOTIA ARC / SOUTH SHETLAND ISLANDS / LIVINGSTON ISLAND	-62.69	-60.33	s_105E [8753]	BASALT [8753]			47.22	1.08	16.96			9.88	9.98	9	0.18	0.3	1.83	0.17	2.38	62.1166	1.07509	1279.26	1.42836	1673.31	1.12256			16.75						6474.6	247	488		160				13	305	17	79	4
[6678]	SCOTIA ARC	SCOTIA ARC / SOUTH SHETLAND ISLANDS / KING GEORGE ISLAND / FILDES FORMATION	-62.05	-58.4	s_P.1147.3 [6678]	BASALT [6678] / NOT GIVEN [6678]			49.6	0.5	19.6	2.33	5.84	7.93653	12.22	7.4	0.14	0.38	2.04	0.08		62.6631	0.887333	1212.38	1.05757	1302.82	0.970765									2997.5		40		28		58	19	4	616	9	62
[6678]	SCOTIA ARC	SCOTIA ARC / SOUTH SHETLAND ISLANDS / GREENWICH ISLAND	-62.5	-60	s_P.55.1 [6678]	BASALT [6678]			48.2	1.31	15.5	2.81	7.02	9.54844	10.79	10.2	0.16	0.49	3.62	0.19		65.7866	3.24848	1270.47	1.67351	1735.09	1.30267			35.75						7853.45		700		367		68	19		477	12	77	4
[6678]	SCOTIA ARC	SCOTIA ARC / SOUTH SHETLAND ISLANDS / ROBERT ISLAND / COPPERMINE FORMATION	-62.35	-59.6	s_P.842.9 [6678]	BASALT [6678]			50.3	1.1	16.5	2.57	6.43	8.74249	10.48	8.9	0.17	0.54	2.56	0.48		64.6946	1.31644	1230.5	1.1429	1471.44	1.10942			56						6594.5		200		67		71	21		704	19	112	4
[6678]	SCOTIA ARC	SCOTIA ARC / SOUTH SHETLAND ISLANDS / GREENWICH ISLAND / COPPERMINE FORMATION	-62.5	-60	s_P.842.4 [6678]	BASALT [6678] / NOT GIVEN [6678]			51.7	1.06	16.7	2.59	6.48	8.81048	10.63	8.8	0.15	0.69	2.59	0.11		64.2584	1.2366	1226.31	1.09886	1432.56	1.09335									6354.7		230		70		75	21	9	681	20	112
[10315]	SCOTIA ARC	SCOTIA ARC / SOUTH SHETLAND ISLANDS / KING GEORGE ISLAND / MELVILLE PEAK	-62.05	-58.4	s_G.31.1 [10315]	BASALT [10315]			52	0.91	17.14	1.59	5.68	7.11068	10.75	7.1	0.12	0.91	3	0.12	0.16	64.2512	1.69868	1181.39	0.881813	1173.4	0.974714			111						5455.45		115		41		56	18	16	566	21	104	2
[10315]	SCOTIA ARC	SCOTIA ARC / SOUTH SHETLAND ISLANDS / KING GEORGE ISLAND / MELVILLE PEAK	-62.05	-58.4	s_G.32.1 [10315]	BASALT [10315]			52.03	0.88	16.85	1.43	5.71	6.99671	11.22	7.3	0.14	0.89	2.87	0.13		65.2539	1.56563	1177.67	0.850334	1184.82	0.999936			89.6667						5275.6		172		37		47	17	16	599	20	103	3
[7939]	SCOTIA ARC	SCOTIA ARC / SOUTH SHETLAND ISLANDS / LIVINGSTON ISLAND	-62.67	-61.25	s_98-30 [7939]	BASALT [7939]			49.07	0.98	16.61	3.01	6.07	8.7784	9.04	8.18	0.15	0.27	2.72	0.23	4.46	62.6489	1.47283	1237.69	1.1385	1461.25	1.0354			36.9246	3.36216	1.77838				5875.1	223	320	40	121				7	341.3	20.4	75.5	1.99	0.581
[2594]	SCOTIA ARC	SCOTIA ARC / SOUTH SHETLAND ISLANDS / PENGUIN ISLAND	-62.06	-57.56	s_P.721.3 [2594]	BASALT [2594]			49.02	1.08	15.81			8.95	10.08	8.95	0.18	0.48	3.95	0.28		64.2857	3.25995	1248.88	1.46343	1577.03	1.18584			80.5	6.71141	1.90604				6474.6		494		159		69	21	5.2	534	12	80	2
[2594]	SCOTIA ARC	SCOTIA ARC / SOUTH SHETLAND ISLANDS / PENGUIN ISLAND	-62.06	-57.56	s_P.802.1 [2594]	BASALT [2594]			49.25	1.22	15.34			9.35	10.46	8.84	0.18	0.47	3.7	0.26		62.9879	2.78222	1260.09	1.47962	1669.63	1.21082			33						7313.9		447		137		78	22	5.7	536	10	80	4
[2193][22052][23853][14922][2189]	SCOTIA ARC	SCOTIA ARC / SOUTH SANDWICH ISLAND ARC / MONTAGU	-58.42	-26.33	s_SSM.5.4 [2193] / s_SSM5.4 [22052]	BASALT [2193] / NOT GIVEN [22052] / OCEANITE [2189]	55.6973	-90.5711	48.66	0.46	18.58	2.89844	6.09352	8.7	12.89	8.24	0.18	0.1	1.3	0.35	0.274474	63.0291	0.34629	1236.31	1.09115	1508.48	1.06288	5.09615	1.57371	120.411		1.51284			41.6	2757.7	212	154	40	41	79	58	14	12.565	132.6	18.4	50.2	0.735	0.6016
[2193][2724][14922]	SCOTIA ARC	SCOTIA ARC / SOUTH SANDWICH ISLAND ARC / VINDICATION	-57.1	-26.77	s_SSV.1.2 [2193]	BASALT [2193] / NOT GIVEN [14922]	56.8181	-90.7264	49.74	0.47	18.82			8.33	12.4	6.97	0.17	0.09	1.61	0.03	0	60.0977	0.428783	1224.28	0.977327	1404.37	0.969197	5.62842	3.03448	179.167		1.46552			36.6	2817.65	206	69	41	18	88	64	14.7	3	98	12	29	0.24	0.11
[14922]	SCOTIA ARC	SCOTIA ARC / SOUTH SANDWICH ISLAND ARC / ZAVODOVSKI	-56.33	-27.53	s_SS.19.2 [14922]	NOT GIVEN [14922]	55.8655	-84.9108	50.81	0.5	17.93			8.55	13.06	7.17	0.17	0.1	1.65	0.05		60.151	0.392125	1226.7	0.950281	1479.75	1.02299	6.05206	0.141827	155.556					46.1	2997.5	279	95	38.1	32	2.95	124		2.34	134	11.7	20.8	0.18	0.1
[10526]	SCOTIA ARC	SCOTIA ARC / SOUTH SANDWICH ISLAND ARC / CANDLEMAS	-57.08	-26.72	s_SS.87.9 [10526]	THOLEIITE [10526]	55.116	-82.0835	49.74	0.56	18.51			8.49	12.57	7.16	0.16	0.18	1.71	0.06	0.23	60.2863	0.529985	1229.14	1.03273	1443.18	1.00222	6.21554	4.21941	137.333		1.50704			39.9	3357.2	248	59	35.9	27	100	75	17	2.1	148	14.2	23.7	0.3	0.07
[14922]	SCOTIA ARC	SCOTIA ARC / SOUTH SANDWICH ISLAND ARC / SAUNDERS	-57.8	-26.47	s_SS.18.18 [14922]	NOT GIVEN [14922]	54.7956	-89.3347	51.3622	0.674758	16.7884			8.92782	11.5212	8.38915	0.171207	0.281988	1.80271	0.0805681		62.8446	0.519718	1231.09	0.97271	1497.86	1.07427	7.12297	0.0431548	120					43.1	4045.17	307	251	39.2	88	1.45	65		7.11	120	16.2	33.6	0.5	0.33
[2193]	SCOTIA ARC	SCOTIA ARC / SOUTH SANDWICH ISLAND ARC / ZAVODOVSKI	-56.33	-27.53	s_SSZ.1.1 [2193]	BASALT [2193]	55.8655	-84.9108	49.92	0.56	16.53			9.19	12.58	8.27	0.18	0.12	1.6	0.02		61.8292	0.427514	1247.69	1.07245	1638.24	1.12703		2.45455							3357.2	237	147	42	34	81	60		3	126	11	33
[2192]	SCOTIA ARC	SCOTIA ARC / SOUTH SANDWICH ISLAND ARC	-57.8	-26.45	s_SSS.1.4 [2192]	BASALT [2192]	52.2964	-81.489	50.48	0.62	17.55			8.31	11.47	7.06	0.17	0.28	2	0.15		60.4625	0.694973	1221.34	0.951306	1392.89	0.987285
[9837][14922]	SCOTIA ARC	SCOTIA ARC / SOUTH SANDWICH ISLAND ARC / MONTAGU	-58.42	-26.33	s_SS24.5 [9837]	NOT GIVEN [9837]	55.6973	-90.5711	48.68	0.43	15.6			8.81	13.38	10.87	0.17	0.08	1.22	0.03	-0.37	68.9526	0.297535	1236.91	1.05618	1707.73	1.3038			147.059		1.56481												2.3	112	10.7	15.2	0.17	0.09
[2193][2724]	SCOTIA ARC	SCOTIA ARC / SOUTH SANDWICH ISLAND ARC / ZAVODOVSKI / MOUNT CURRY	-56.3	-27.57	s_SSZ.83.1 [2193]	BASALT [2193]	57.1072	-91.8944	50.88	0.59	16.22			9.42	12.23	7.95	0.18	0.12	1.53	0.03	0	60.3034	0.345495	1251.04	1.01701	1645.76	1.10256		3.39394	34							269	160	39	39	112	66		3	123	14	33	2
[17872][20375]	KURILE ARC	KURILE ARC / KURILE ARC / KUNASHIR	43	145	s_P-75/13 [17872]	ANDESITE, BASALTIC [17872]	25.1402	-48.0267	52.5	0.56	14.62			8.77	8.27	12.22	0.38	1.11	1.35	0.06	1.85	71.4945	0.637011	1213.14	0.849238	1341.35	1.19404	5.55556		1322.57	3.88785	1.6729	8.23	0.309	45	3357.2	250	182		58.2			10.4	14.52	105	9.5	21.19	0.3531	3.48
[10871][16007][6973]	KURILE ARC	KURILE ARC / KURILE ARC / RISHIRI / RISHIRI	45.1	141.27	s_MH-02 [10871]	BASALT [10871]	31.2657	-248.109	49.87	1.03	16.52			9.38	9.37	8.35	0.17	0.77	3.3	0.24		61.5731	2.41119	1255.76	1.38724	1505.42	1.0958	6.12028		38.8667	6.96491	1.85965			33.92	6174.85	207.6	300.7	68.49	165.6			14.46	17.9	379.4	24.8	109.7	4.5	1
[17872][17697]	KURILE ARC	KURILE ARC / KURILE ARC / KUNASHIR	43	145	s_P-112/14 [17872] / s_R-112/14 [17697]	BASALT [17872]	25.1402	-48.0267	48.95	0.59	14.89			10.02	10.07	12.68	0.17	0.06	1.23	0.04	-0.43	69.4921	0.279681	1266.66	1.19664	1786.56	1.32991	6.47368		407.407	1.48092	1.59542	2.72	0.154	38	3537.05	246	492		165			6.5	1.38	178	11.1	20.3	0.243	0.08
[10871][3967][16007][6973]	KURILE ARC	KURILE ARC / KURILE BASIN / HOKKAIDO / PISSHIRIDAKE FORMATION	44	142	s_SHM-18 [10871] / s_SHM18 [3967]	BASALT [10871] / NOT GIVEN [3967]	29.7498	-172.599	51.04	0.97	14.36	10.01		8.86	10.38	9.43	0.14	0.84	2.57	0.14		65.7041	1.44628	1231.48	1.08782	1523.39	1.20177	6.54725		87.15	5.8	2.06207			38.52	5815.15	252.2	440	56.7	165.8			16.69	18.2	346.7	17.7	79.2	2	0.96
[16007]	KURILE ARC	KURILE ARC / KURILE BASIN / HOKKAIDO	43.5	142	s_990629-09 [16007]	BASALT [16007]	29.6605	-143.276	52.57	0.7	15.1			8.11	9.12	8.49	0.15	0.82	2.37	0.09		65.33	1.06333	1201.84	0.796054	1289.37	1.04183	6.55332		79	3.59563	1.64481			32.35	4196.5	212	451.4	64.63	184.4			15.75	24	207.2	19.7	79	2.2	1.84
[20375]	KURILE ARC	KURILE ARC / KURILE ARC / KUNASHIR	43	145	s_P-76/10 [20375]	BASALT [20375]	25.1402	-48.0267	51.03	0.68	17.21			11.93	1.31	13.55	0.37	0.11	2.37	0.05		67.1531	0.765928	1305.05	1.24206	1594.62	1.05046	6.64474		208.333	2.19277	1.77108	18.04	0.341	45.6	4076.6	303	189		44			10.6	2.66	19	8.6	14.9	0.24	1.92
[10871][4334][16007][6973]	KURILE ARC	KURILE ARC / KURILE ARC / HOKKAIDO / ENGARU VOLCANIC FIELD / CHIYODA-KAKUREZAWA BASALT	44.02	143.25	s_CK-15 [10871] / s_CK15 [4334]	BASALT [10871]	32.4447	-149.869	49.92	1.3	16.43		9.37	9.37	8.9	8.58	0.13	0.83	2.79	0.32		62.2391	1.8937	1251.51	1.28894	1482.7	1.07828	6.86723		23.8667	4.92562	1.80992			30.58	7793.5	210	502	45.24	153			16.4	20	383	30	123	7.5	0.39
[10871][16007]	KURILE ARC	KURILE ARC / KURILE BASIN / HOKKAIDO	43.5	141.2	s_D-7 [10871]	BASALT [10871]	27.4243	-158.961	50.9	1	15.02			8.05	9.43	10.05	0.15	1.12	2.75	0.23		69.2043	1.89581	1207.49	1.04542	1334.97	1.16655	6.9261		86.8776	5.15789	1.73279			30.58	5995	211.8	145.9	52.22	159.6			16.63	33.4	507.1	23.5	105.3	4.9	1.73
[16007]	KURILE ARC	KURILE ARC / KURILE BASIN / HOKKAIDO / PISSHIRIDAKE FORMATION	44	142	s_SHM-21 [16007]	BASALT [16007]	29.7498	-172.599	50.36	0.97	14.24			9.08	10.21	9.26	0.14	0.78	2.72	0.15		64.7351	1.6644	1242.36	1.17276	1577.31	1.21084	6.93703		69.2143	5.87324	2.09155			37.48	5815.15	260	461.9	53.66	157.2			16.42	16.3	346.5	18.1	79.8	2.8	1.1
[2536][3043]	KURILE ARC	KURILE ARC / KURILE ARC / ALAID / ALAID	50.87	155.57	s_C23 [2536]	BASALT [2536]	45.229	-119.255	46.72	0.97	15.09	3.75	6.54	9.91425	10.83	11.9	0.174	1.23	2.22	0.243		68.3597	3.1996	1287.15	1.80432	1711.34	1.40837	6.95455	2	30.6494	7.44186		3		44	5815.15	306	667	48	210	118	94	14	22.4	469	18	59	7.7	0
[16007]	KURILE ARC	KURILE ARC / KURILE ARC / HOKKAIDO / SHANAFUCHI FORMATION	43.8	143.3	s_NR-07 [16007]	BASALT [16007]	32.3819	-136.791	48.95	1.07	16.63			8.85	10	8.54	0.17	0.64	2.64	0.21		63.463	1.80813	1241.73	1.25973	1475.92	1.09533	6.97237		48.1613	4.15311	1.76555			32.93	6414.65	229.6	293.6	86.77	133			15.92	15.6	364.7	22.7	89.7	3.1	0.83
[7023]	KURILE ARC	KURILE ARC / KURILE ARC / HOKKAIDO / SHANABUCHI FORMATION	43	142	s_SY-12 [7023]	NOT GIVEN [7023]	27.9281	-116.11	51.42	1.17	17.57	9.07		8.16119	10.44	7.37	0.16	0.52	2.83	0.21	0.86	61.912	1.33284	1212.21	1.01856	1331.02	0.985683	7.03125	0.283019	48.0769					32	7014.15	225	190		56	30	86		9.9	341	25	106	2.6
[7023]	KURILE ARC	KURILE ARC / KURILE ARC / HOKKAIDO / MONBETSU FORMATION	44	143	s_KODO-1 [7023]	NOT GIVEN [7023]	31.855	-155.418	52.05	1.23	17.12	8.73		7.85525	9.05	7.04	0.16	0.93	3.13	0.26	2.47	61.7326	1.82139	1202.11	0.965926	1214.07	0.940873	7.2069	0.25	42.1739					29	7373.85	209	286		112	33	68		17.4	361	33	132	4.6
[10871][16007]	KURILE ARC	KURILE ARC / KURILE BASIN / HOKKAIDO	43.5	143.4	s_SP-06 [10871]	BASALT [10871]	31.8675	-115.552	50.62	1.03	17.2			8.54	9.12	8.29	0.17	1.02	2.91	0.26		63.6007	2.02689	1224.15	1.16451	1308.39	1.02499	7.28403		51.0408	4.71901	1.63636			30.56	6174.85	222.6	276.5	64.42	139.3			15.94	34.8	382.3	26.8	101.2	4.9	0.51
[10871][16007]	KURILE ARC	KURILE ARC / KURILE ARC / HOKKAIDO / SHANAFUCHI FORMATION	43.8	143.3	s_NR-05 [10871]	BASALT [10871]	32.3819	-136.791	50.41	1.09	17.43			8.86	10.01	8.44	0.18	0.61	2.79	0.22		63.1631	1.56005	1234.3	1.20726	1422.04	1.05393	7.29082		34.5106	4.22897	1.77103			32.15	6534.55	234.4	296.6	65.67	139.6			16.11	11	373	24.2	95	4.7	0.42
[16007]	KURILE ARC	KURILE ARC / KURILE BASIN / HOKKAIDO	43.5	141.2	s_MT-8 [16007]	BASALT [16007]	27.4243	-158.961	50.62	1.03	17.2			8.54	9.12	8.29	0.17	1.02	2.91	0.26		63.6007	2.02689	1224.15	1.16451	1308.39	1.02499	7.29766		76.3261	5.11837	1.7102			29.53	6174.85	215.5	505.8	62.11	210.6			16.16	28.5	452.4	20.4	90.6	4.6	1.13
[16007]	KURILE ARC	KURILE ARC / KURILE ARC / RISHIRI / RISHIRI	45.1	141.27	s_HS-01 [16007]	BASALT [16007]	31.2657	-248.109	50.9	1	15.02			8.05	9.43	10.05	0.15	1.12	2.75	0.23		69.2043	1.89581	1207.49	1.04542	1334.97	1.16655	7.38713		31.5224	7.50244	1.81463			28.13	5995	207.8	200.4	68.7	94.6			16.35	20.4	550.9	23.7	131.5	6.7	0.89
[2536]	KURILE ARC	KURILE ARC / KURILE ARC / SIMUSHIR / MILNE (MILNA)	46.82	151.75	s_C316/2 [2536]	ANDESITE, BASALTIC [2536]	36.9343	-66.3079	53.5	0.806	16.75	2.77	5.73	8.22245	8.93	7.17	0.173	0.939	2.85	0.157		61.0835	1.36729	1206.05	0.879302	1219.84	0.939605	7.48485	0.772152	144	2.59259		6		33	4831.97	247	249	30	117	61	80	18	17.5	356	26	79	1.5	1
[3048]	KURILE ARC	KURILE ARC / KURILE ARC / BROU(GH)TON(A) / BROU(GH)TON(A)	47.12	152.23	s_V40-8/2 [3048]	BASALT, OLIVINE-CLINOPYROXENE [3048]	38.1085	-65.8821	47.12	0.87	15.69	2.93	6.89	9.52641	11.12	11.32	0.16	0.98	2.18	0.22	0.12	68.1417	2.42369	1270.79	1.62385	1656.39	1.34073	8.18182		64.8	5.03977				39.6	5215.65	324	1092	46.1	203				15	198	19	56	2.5	0.2
[17872][20375]	KURILE ARC	KURILE ARC / KURILE ARC / KUNASHIR	43	145	s_P-127/3 [17872]	BASALT [17872]	25.1402	-48.0267	50.94	1.06	19.17			8.56	9.65	7.24	0.4	0.18	2.23	0.11	5.7	60.3557	0.731499	1222.47	1.00844	1312.17	0.898553	8.2		119.368	2.0917	1.72926	1.59	0.442	40	6354.7	328	248		80.7			17.1	2.57	194	21.2	49.925	1.265	0.6
[16007]	KURILE ARC	KURILE ARC / KURILE BASIN / HOKKAIDO	43.5	143.4	s_NA-08 [16007]	BASALT [16007]	31.8675	-115.552	49.58	1.04	16.91			8.54	9.4	7.56	0.17	1.03	2.87	0.27		61.4412	2.31155	1232.37	1.2144	1342.42	1.01947	8.30848		59.5581	6.66818	1.80909			27.49	6234.8	228.4	251.1	86.32	127.2			17.04	30.8	393.1	26.6	102.2	4.3	0.54
[3048]	KURILE ARC	KURILE ARC / KURILE ARC / CHERNYE BRAT^YA ISLANDS / BRAT SHIRPOEV (BRAT CHIRPOEV)	46.69	150.83	s_V15-90/5 [3048]	BASALT, OLIVINE-CLINOPYROXENE-PLAGIOCLASE [3048]	43.0281	-104.549	50.38	0.48	16.24	2.63	6.38	8.74647	11.63	10.5	0.17	0.35	1.56	0.07	0.19	68.3631	0.494322	1225.15	0.998189	1516.53	1.19329	9.02256			2.61667				39.9	2877.6	360	360	46.9	100				5	320				0.35
[3252][13855][3261]	KURILE ARC	KURILE ARC / KURILE ARC / RISHIRI / RISHIRI	45.1	141.27	s_K-26 [3252]	BASALT, OLIVINE-AUGITE [3252]	31.2657	-248.109	50.69	1.28	16.59	4.06	5.01	8.66319	10	7.34	0.1	1.03	3.49	0.14		60.3972	2.65675	1233.88	1.27064	1397.69	1.05174				5.54167				24.5	7673.6		144	29
[11404]	KURILE ARC	KURILE ARC / KURILE ARC / KUNASHIR / ALEKHIN FORMATION	44	146	s_Y-3029 [11404]	BASALT [11404]	35.1104	-87.2364	48.68	0.68	15.76	3.86	5.39	8.86323	9.91	12.35	0.24	0.21	1.5	0.31	0.61	71.4947	0.514806	1234.65	1.10327	1560.83	1.25964			155.286	1.48387	1.54194			31.4	4076.6							12.69	2.33	185.01	16.38	24.26	0.35	0.14
[11404]	KURILE ARC	KURILE ARC / KURILE ARC / ITURUP (ITIRUP) / BOGDAN KHMELNITSKII (CHMELNITSKI)	45	148	s_YB3023 [11404]	BASALT [11404]	38.9863	-86.4312	50.45	0.9	17.74			8.55	9.91	8.02	0.19	1.21	2.76	0.28	0.01	62.8034	2.11556	1226.65	1.22169	1293.87	1.02453			47.2727	4.44444				34	5395.5							13	30.6	546	26	92	4.4	0.8
[11404]	KURILE ARC	KURILE ARC / KURILE ARC / ITURUP (ITIRUP) / BOGDAN KHMELNITSKII (CHMELNITSKI)	45	148	s_Y-3045 [11404]	ANDESITE, BASALTIC [11404]	38.9863	-86.4312	52.9	0.84	17.28	3.58	3.58	6.80128	8.97	6.65	0.25	1.35	2.7	0.42	0.91	63.7676	1.65682	1168.55	0.755259	1010.15	0.875155			43.5509	4.77344	1.71875			20.59	5035.8							15.9	32.93	378.74	26.07	104.26	4.03	1.87
[11404]	KURILE ARC	KURILE ARC / KURILE ARC / PARAMUSHIR	50	155	s_P28/2 [11404]	BASALT [11404]	36.3184	-94.5236	48.24	0.96	18.25	0.19	6.61	6.78096	11.19	8.95	0.18	0.72	2.26	0.35	0.96	70.3771	1.69473	1181.38	1.0122	1192.35	1.04462			51.2356	3.71795	1.6			34.26	5755.2							15.78	13.23	402.09	19.25	48.11	2.08	0.44
[12613]	KURILE ARC	KURILE ARC / KURILE ARC / RISHIRI / RISHIRI	45.1	141.27	s_SE-9 [12613]	NOT GIVEN [12613]	31.2657	-248.109	50.64	1.23	16.93	9.58		8.62008	10.08	7.71	0.17	0.82	3.25	0.35		61.6853	2.16818	1230.51	1.22541	1398.6	1.04826			36.9388					33	7373.85		239		101				24.4	528	24.7	133	4.9
[3408]	KURILE ARC	KURILE ARC / KURILE ARC / HOKKAIDO	43.77	142.38	s_8 [3408]	BASALT, OLIVINE-AUGITE [3408]	30.7478	-153.648	48.26	1.22	17.5	2.96	6.09	8.75341	10.24	8.26	0.17	0.7	2.52	0.25		62.9429	1.97118	1242.16	1.31776	1445.18	1.06639									7313.9
[4037]	KURILE ARC	KURILE ARC / KURILE ARC / HOKKAIDO	44.2428	143.449	s_K-18-101 [4037]	NOT GIVEN [4037]	32.4407	-161.239	52.31	1.2	16.76	8.42		7.57632	8.65	7.63	0.14	1.12	3.25	0.26		64.4477	2.05122	1190.44	0.931447	1161.42	0.961892									7194
[4037]	KURILE ARC	KURILE ARC / KURILE ARC / HOKKAIDO	44.2428	143.449	s_K-18-105 [4037]	NOT GIVEN [4037]	32.4407	-161.239	51.24	1.28	16.76	8.86		7.97223	8.91	7.2	0.15	1.06	3.27	0.3		61.9141	2.27535	1208.54	1.05101	1241.68	0.971824									7673.6
[4037]	KURILE ARC	KURILE ARC / KURILE ARC / HOKKAIDO	44.2428	143.449	s_K-18-106 [4037]	NOT GIVEN [4037]	32.4407	-161.239	52.47	1.21	16.55	8.39		7.54932	8.69	7.38	0.14	1.08	3.23	0.27		63.7632	1.96157	1190.11	0.902134	1165.67	0.954157									7253.95
[4037]	KURILE ARC	KURILE ARC / KURILE ARC / HOKKAIDO	44.2428	143.449	s_K-18-107 [4037]	NOT GIVEN [4037]	32.4407	-161.239	52.12	1.21	16.74	8.56		7.70229	9.62	7.01	0.14	0.99	3.29	0.29		62.0956	2.0086	1198.07	0.971844	1223.74	0.970702									7253.95
[4037]	KURILE ARC	KURILE ARC / KURILE ARC / HOKKAIDO	44.3508	143.341	s_MON-BAS [4037]	NOT GIVEN [4037]	31.8696	-176.088	52.89	1.17	17.95	8.58		7.72028	8.86	7.13	0.13	0.61	3.05	0.26		62.4395	1.35446	1192.01	0.864269	1174.29	0.895689									7014.15
[4037]	KURILE ARC	KURILE ARC / KURILE ARC / HOKKAIDO	44.0781	143.408	s_K-17-12 [4037]	NOT GIVEN [4037]	32.5915	-154.609	49.9	1.23	17.12	9.32		8.38614	10.57	7.04	0.17	0.56	2.99	0.22		60.1763	1.82645	1228.81	1.16728	1413.17	1.01586									7373.85
[3890][3517]	KURILE ARC	KURILE ARC / KURILE ARC / HOKKAIDO / NIRINPANGAWA LAVA	44.0011	143.471	s_MA2 [3890]	BASALT [3890]	32.9622	-146.067	49.8	1.13	17.65			8.7	9.71	8.06	0.16	0.7	2.92	0.23		62.5129	1.92712	1233.81	1.24106	1385.56	1.02793			45.2778	3.7134					6774.35	241	284		121		60		18.9	333.8	23	101	3.6
[3890][3517]	KURILE ARC	KURILE ARC / KURILE ARC / HOKKAIDO / KAKUREZAWA LAVA	44.027	143.455	s_MA954 [3890]	BASALT [3890]	32.9622	-146.067	51.88	1.09	16.58			8.47	8.57	7.75	0.16	0.81	2.88	0.21		62.2212	1.53334	1217.24	0.989029	1297.55	0.979652			34.3182	3.14286					6534.55	194	376		129		65		23.5	292.2	23	121	4.4
[3890][3517]	KURILE ARC	KURILE ARC / KURILE ARC / HOKKAIDO / MINAMINOSAWA LAVA	44.092	143.559	s_MA8 [3890]	BASALT [3890]	33.151	-150.93	49.2	0.99	16.58			8.63	9.84	9.34	0.15	0.52	2.56	0.16		66.0797	1.53006	1230.31	1.17707	1448.74	1.11439			31.3889	2.94553					5935.05	227	351		132		61		9.5	318.1	19	86	3.6
[10871][6973]	KURILE ARC	KURILE ARC / KURILE BASIN / YAGISHIRI	44.4256	141.429	s_YA-03 [10871]	BASALT [10871]	28.3461	-204.622	47.32	0.86	15.69			8.55	10.51	10.99	0.17	0.47	2.01	0.12		69.8221	1.4237	1236.98	1.25	1550.4	1.25197			60.4348						5155.7	249.2	403		165.8				10.6	343	16.8	61	2.3
[6973][3967]	KURILE ARC	KURILE ARC / KURILE BASIN / HOKKAIDO / PISSHIRIDAKE FORMATION	44	142	s_SHM-19 [6973] / s_SHM19 [3967]	BASALT [6973] / NOT GIVEN [3967]	29.7498	-172.599	51.75	0.99	14.66	10.52		9.61	10.46	8.78	0.13	0.83	2.63	0.14		62.1862	1.36818	1252.31	1.18128	1603.26	1.17729			66.4286						5935.05	251.1	434		162				12.9	351	17.5	82	2.8
[6973][3967]	KURILE ARC	KURILE ARC / KURILE BASIN / HOKKAIDO / PISSHIRIDAKE FORMATION	44	142	s_SHM-21 [6973] / s_SHM21 [3967]	BASALT [6973] / NOT GIVEN [3967]	29.7498	-172.599	51.16	0.98	14.49	9.92		9.27	10.49	9.88	0.14	0.83	2.6	0.14		65.7352	1.44178	1242.6	1.17926	1583.19	1.23364			54.1667						5875.1	259.3	447		158.7				22.7	350	15.8	82	2.4
[4334]	KURILE ARC	KURILE ARC / KURILE ARC / HOKKAIDO / ENGARU VOLCANIC FIELD / CHIYODA-KAKUREZAWA BASALT	44.02	143.25	s_CK06 [4334]	BASALT [4334]	32.4447	-149.869	49.41	1.27	16.38		8.86	8.86	9.02	7.87	0.15	0.75	2.66	0.28		61.5218	1.81406	1240.66	1.18643	1431.03	1.03575			28.7838						7613.65	201	380		145				15	395	29	126	7.4
[4334]	KURILE ARC	KURILE ARC / KURILE ARC / HOKKAIDO / ENGARU VOLCANIC FIELD / CHIYODA-KAKUREZAWA BASALT	44.02	143.25	s_CK12 [4334]	BASALT [4334]	32.4447	-149.869	49.87	1.23	17.6		8.24	8.24	10.33	7.05	0.14	0.43	2.91	0.21		60.6307	1.62381	1222.64	1.11578	1376.63	0.984743			30.6818						7373.85	218	303		90				10	354	29	109	4.4
[19410]	KURILE ARC	KURILE ARC / KURILE ARC / HOKKAIDO	43.6606	143.37	s_080730-03-A [19410]	BASALT [19410]	32.4761	-128.279	51.08	0.96	16.21			9.45	11.05	8.04	0.19	0.54	2.28	0.19		60.4966	0.984208	1251.17	1.16296	1572.62	1.09929			102.014	3.66667	1.625				5755.2	263.51	357.96		110.23				9.94	285.74	20.97	65.87	2.08	0.51
[19410]	KURILE ARC	KURILE ARC / KURILE ARC / HOKKAIDO	43.6606	143.37	s_080730-03-B [19410]	BASALT [19410]	32.4761	-128.279	51.02	0.98	16.43			9.25	10.94	8.12	0.17	0.62	2.27	0.19		61.2419	1.04141	1245.17	1.14705	1524.33	1.08903			108.77	3.90521	1.68246				5875.1	255.96	291.68		83.11				13.84	308.77	22.05	68.42	2.09	0.52
[19410]	KURILE ARC	KURILE ARC / KURILE ARC / HOKKAIDO	43.9815	143.46	s_080731-03 [19410]	BASALT [19410]	32.9622	-146.067	50.27	1.06	17.05			9.052	10.25	8.674	0.172	0.57	2.68	0.21		63.3005	1.45289	1240.22	1.22722	1477.41	1.087			44.4719	3.69841	1.69841				6354.7	252.09	320.83		118.35				13.64	350.89	21.13	84.62	3.2	0.36
[19410]	KURILE ARC	KURILE ARC / KURILE ARC / HOKKAIDO	44.0919	143.561	s_080731-06C [19410]	BASALT [19410]	33.151	-150.93	50.52	1	16.61			8.891	10.27	9.495	0.161	0.5	2.41	0.15		65.7802	1.12608	1231.26	1.1307	1474.3	1.12187			55.0373	3.80791	1.71751				5995	229.34	395.49		129.85				6.98	338.43	19.98	80.8	2.68	0.22
[19410]	KURILE ARC	KURILE ARC / KURILE ARC / HOKKAIDO	44.0919	143.561	s_080731-06B [19410]	BASALT [19410]	33.151	-150.93	50.69	1.08	16.81			8.783	10.01	9.285	0.158	0.58	2.43	0.18		65.5515	1.17817	1227.93	1.11299	1432.62	1.09461			46.1023	3.98953	1.79581				6474.6	229.91	377.36		120.59				10.6	327.82	21.93	86.23	3.03	0.16
[22956]	KURILE ARC	KURILE ARC / KURILE ARC / HOKKAIDO / OAKAN	43.3	144	s_070924-9-1 [22956]	NOT GIVEN [22956]	32.7699	-88.3026	52.46	0.65	16.12			9.65	10.08	8.12	0.17	0.54	2.13	0.09		60.2324	0.753584	1248.78	1.03793	1515.88	1.05658									3896.75
[6270]	KURILE ARC	KURILE ARC / KURILE BASIN / HOKKAIDO / TAKIKAWA VOLCANO GROUP	43.8709	141.678	s_JN-2 [6270]	NOT GIVEN [6270]	29.0226	-171.712	46.8	1.08	15.48	10.82		9.73584	10.11	10.32	0.16	0.68	2.76	0.19	3.4	65.6121	3.11411	1280.87	1.67139	1715.04	1.28604									6474.6
[6270]	KURILE ARC	KURILE ARC / KURILE BASIN / HOKKAIDO / TAKIKAWA VOLCANO GROUP	43.5151	142.01	s_KM-4 [6270]	NOT GIVEN [6270]	29.6605	-143.276	48.25	1.23	17.45	9.47		8.52111	10.94	8.02	0.16	0.86	3.04	0.26	0.4	62.8825	2.89714	1239.83	1.41291	1439.47	1.09514									7373.85
[6270]	KURILE ARC	KURILE ARC / KURILE BASIN / HOKKAIDO / TAKIKAWA VOLCANO GROUP	43.8634	142.121	s_TK-1 [6270]	NOT GIVEN [6270]	30.058	-164.968	48.18	1.33	17.06	9.98		8.98	10.89	8.49	0.17	0.77	2.92	0.22	0.06	62.9874	2.62859	1252.25	1.47229	1530.31	1.13673									7973.35
[6270]	KURILE ARC	KURILE ARC / KURILE BASIN / HOKKAIDO / TAKIKAWA VOLCANO GROUP	43.6154	141.654	s_FJ-2 [6270]	NOT GIVEN [6270]	29.031	-154.712	47.87	0.82	15.98	9.28		8.35014	10.09	10.94	0.14	0.82	2.69	0.18	1.51	70.2229	2.52979	1230.29	1.33878	1449.99	1.24066									4915.9
[6270]	KURILE ARC	KURILE ARC / KURILE BASIN / HOKKAIDO / TAKIKAWA VOLCANO GROUP	43.816	141.794	s_TBL-3 [6270]	NOT GIVEN [6270]	29.3334	-164.265	49.71	1.43	15.36	9.68		8.71006	8.83	10.1	0.1	1.07	2.7	0.38	3.8	67.6086	2.11817	1229.28	1.20793	1425.98	1.16969									8572.85
[6270]	KURILE ARC	KURILE ARC / KURILE BASIN / HOKKAIDO / TAKIKAWA VOLCANO GROUP	43.6522	141.711	s_SB-2 [6270]	NOT GIVEN [6270]	29.0631	-160.335	50.93	1.03	16.87	9.15		8.23317	9.92	9.42	0.18	1.28	2.61	0.29	1.48	67.3146	1.90821	1211.47	1.13342	1283.14	1.09878									6174.85
[6270]	KURILE ARC	KURILE ARC / KURILE BASIN / HOKKAIDO / TAKIKAWA VOLCANO GROUP	43.5745	141.623	s_SK-1 [6270]	NOT GIVEN [6270]	28.7491	-156.598	48.79	1.12	16.04	9.46		8.51211	9.85	9.66	0.14	1.09	2.73	0.26	2.63	67.1349	2.52028	1230.84	1.29666	1412.96	1.16867									6714.4
[6270]	KURILE ARC	KURILE ARC / KURILE BASIN / HOKKAIDO / TAKIKAWA VOLCANO GROUP	43.8745	141.741	s_SA-2 [6270]	NOT GIVEN [6270]	29.0226	-171.712	48.54	1.1	16.14	10.14		9.12397	9.28	10.22	0.17	1.13	2.16	0.24	5.9	66.846	1.95381	1247.27	1.33667	1458.96	1.17499									6594.5
[6270]	KURILE ARC	KURILE ARC / KURILE BASIN / HOKKAIDO / TAKIKAWA VOLCANO GROUP	43.816	141.794	s_TBL-2A [6270]	NOT GIVEN [6270]	29.3334	-164.265	49.64	1.14	17.12	9.02		8.1162	9.98	8.99	0.14	0.61	2.83	0.22	1.52	66.5975	1.78217	1214.48	1.13718	1357.12	1.07733									6834.3
[6270]	KURILE ARC	KURILE ARC / KURILE BASIN / HOKKAIDO / TAKIKAWA VOLCANO GROUP	43.7428	141.724	s_EB-2 [6270]	NOT GIVEN [6270]	29.0631	-160.335	50.14	1.17	16.12	9.28		8.35014	10.01	9.13	0.16	0.93	2.47	0.2	2.29	66.3085	1.61905	1218.96	1.10401	1378.76	1.11296									7014.15
[6270]	KURILE ARC	KURILE ARC / KURILE BASIN / HOKKAIDO / TAKIKAWA VOLCANO GROUP	43.703	141.69	s_OS-3I [6270]	NOT GIVEN [6270]	29.0631	-160.335	49.38	1.11	16.91	9.24		8.31415	9.46	9.01	0.14	0.94	2.92	0.21	5.9	66.1092	2.33536	1221.56	1.21969	1340.86	1.08541									6654.45
[6270]	KURILE ARC	KURILE ARC / KURILE BASIN / HOKKAIDO / TAKIKAWA VOLCANO GROUP	43.5539	141.594	s_TMR-1 [6270]	NOT GIVEN [6270]	28.7491	-156.598	48.79	1.35	15.85	10.34		9.30393	9.67	10.02	0.16	1.27	2.29	0.29	3.6	65.9694	2.18888	1253.59	1.40689	1502.9	1.19955									8093.25
[6270]	KURILE ARC	KURILE ARC / KURILE BASIN / HOKKAIDO / TAKIKAWA VOLCANO GROUP	43.5632	141.601	s_YB-2 [6270]	NOT GIVEN [6270]	28.7491	-156.598	49.52	1.24	15.9	10.8		9.71784	9.51	10.03	0.16	0.84	2.48	0.27	2.8	65.0083	1.69055	1261.49	1.38683	1585.25	1.19056									7433.8
[6270]	KURILE ARC	KURILE ARC / KURILE BASIN / HOKKAIDO / TAKIKAWA VOLCANO GROUP	43.9426	141.633	s_KG-1 [6270]	NOT GIVEN [6270]	28.7372	-173.371	51.13	1.04	17.31	9.1		8.18818	9.91	7.88	0.16	0.92	2.97	0.28	1.07	63.4002	1.86127	1213.36	1.09446	1290.45	1.01461									6234.8
[6270]	KURILE ARC	KURILE ARC / KURILE BASIN / HOKKAIDO / TAKIKAWA VOLCANO GROUP	43.6962	141.804	s_KAT-1 [6270]	NOT GIVEN [6270]	29.3373	-158.521	49.45	1.02	16.65	9.65		8.68307	11.08	8.31	0.14	0.41	2.42	0.22	3.13	63.2712	1.24169	1234.9	1.15651	1506.26	1.09863									6114.9
[6270]	KURILE ARC	KURILE ARC / KURILE BASIN / HOKKAIDO / TAKIKAWA VOLCANO GROUP	43.5281	141.946	s_SN-IS4 [6270]	NOT GIVEN [6270]	29.4397	-145.231	48.43	1.22	17.4	9.36		8.42213	10.6	7.98	0.16	0.9	2.82	0.25	1.41	63.0384	2.54851	1234.43	1.33031	1400.88	1.07175									7313.9
[6270]	KURILE ARC	KURILE ARC / KURILE BASIN / HOKKAIDO / TAKIKAWA VOLCANO GROUP	43.5626	141.591	s_RB-4 [6270]	NOT GIVEN [6270]	28.7491	-156.598	49.18	1.52	16.56	10.39		9.34892	9.87	8.2	0.17	1.11	2.99	0.34	2.77	61.2221	2.72006	1258.69	1.46617	1508.31	1.11202									9112.4
[6270]	KURILE ARC	KURILE ARC / KURILE BASIN / HOKKAIDO / TAKIKAWA VOLCANO GROUP	43.6389	141.689	s_UTR-1 [6270]	NOT GIVEN [6270]	29.031	-154.712	47.17	0.94	17.2	9.24		8.31415	12.44	7.06	0.21	0.79	2.29	0.19	4.73	60.4505	2.27492	1242.3	1.33105	1483.08	1.09035									5635.3
[6270]	KURILE ARC	KURILE ARC / KURILE BASIN / HOKKAIDO / TAKIKAWA VOLCANO GROUP	43.6651	142.038	s_OK-6 [6270]	NOT GIVEN [6270]	29.844	-154.88	49.65	0.92	17.15	8.81		7.92724	11.11	6.73	0.19	1	2.8	0.23	1.72	60.4454	2.17143	1218.5	1.14334	1313.78	1.01156									5515.4
[6270]	KURILE ARC	KURILE ARC / KURILE BASIN / HOKKAIDO / TAKIKAWA VOLCANO GROUP	43.8039	141.726	s_TBR-4 [6270]	NOT GIVEN [6270]	29.0564	-166.006	49.41	1.12	17.41	10.16		9.14197	11.33	7.63	0.21	0.92	2.38	0.18	1.81	60.0368	1.69891	1251.93	1.34408	1487.79	1.07545									6714.4
[20913]	KURILE ARC	KURILE ARC / KURILE ARC / KUNASHIR	43.8	145.8	s_R-75/13 [20913]	BASALT [20913]	33.7808	-78.2191	52.5	0.56	14.62			9.75	8.27	12.22	0.38	1.11	1.35	0.06		69.2875	0.637011	1240.77	0.999667	1466.31	1.22146			1332.86	3.88785	1.6729				3357.2				58.2				14.52	104.7	9.46	30.7	0.35
[20913]	KURILE ARC	KURILE ARC / KURILE ARC / KUNASHIR	43.8	145.8	s_R-74/4 [20913]	BASALT [20913]	33.7808	-78.2191	52.22	0.96	19.42			10.65	3.65	10.07	0.06	0.44	3.34	0.02		62.99	1.54972	1265.98	1.23301	1352.36	0.902937			200.479	1.12548	1.26996				5755.2				12.37				6.07	181.26	18.57	60.3	0.73
[20913]	KURILE ARC	KURILE ARC / KURILE ARC / KUNASHIR	43.8	145.8	s_R-112/14^ [20913]	BASALT [20913]	33.7808	-78.2191	49.04	0.61	16.68			8.7	11.04	11.16	0.21	0.24	1.55	0.27		69.7791	0.53048	1230.45	1.09633	1522.53	1.20329			142.902	1.46452	1.52903				3656.95				45				2.91	181.1	14.99	24.04	0.41
[20913]	KURILE ARC	KURILE ARC / KURILE ARC / KUNASHIR	43.8	145.8	s_R-112/14 [20913]	BASALT [20913]	33.7808	-78.2191	48.95	0.59	14.89			11.14	10.07	12.68	0.17	0.06	1.23	0.04		67.2006	0.279681	1302.75	1.43943	1960.07	1.36276			412.625	1.34848	1.55303				3537.05				165				4.4	178.11	11.05	20.25	0.24
[20913]	KURILE ARC	KURILE ARC / KURILE ARC / KUNASHIR	43.8	145.8	s_YUM-3032K [20913]	BASALT [20913]	33.7808	-78.2191	48.6	0.6	16.47			8.592	10.9	11.02	0.21	0.24	1.53	0.27		69.7763	0.559446	1228.73	1.08043	1516.46	1.20095			144.575	1.46405	1.52941				3597								2.87	178.74	14.8	23.73	0.4
[20913]	KURILE ARC	KURILE ARC / KURILE ARC / KUNASHIR	43.8	145.8	s_YUM-3029K [20913]	BASALT [20913]	33.7808	-78.2191	48.68	0.68	15.76			8.864	9.91	12.35	0.24	0.21	1.5	0.31		71.4929	0.514806	1234.65	1.10329	1560.88	1.25967			155.286	1.48387	1.54194				4076.6								2.33	185.01	16.38	24.26	0.35
[6973]	KURILE ARC	KURILE ARC / KURILE ARC / RISHIRI / RISHIRI	45.1	141.27	s_OW-01 [6973]	BASALT [6973]	31.2657	-248.109	50.79	1.16	16.84			8.59	10.07	7.74	0.16	0.98	3.33	0.33		61.8595	2.38461	1229.59	1.24085	1377.79	1.05531			41.3115						6954.2	214.6	199		96.7				18.9	566	23.9	131	6.1
[6973]	KURILE ARC	KURILE ARC / KURILE ARC / RISHIRI / RISHIRI	45.1	141.27	s_HS-01 [6973]	BASALT [6973]	31.2657	-248.109	50.85	1.19	16.85			8.61	9.84	7.79	0.16	0.96	3.39	0.34		61.9565	2.41051	1229.12	1.23779	1373.95	1.05089			30.1471						7134.05	208.4	206		99.3				18.8	557	24.6	138	6.8
[6973]	KURILE ARC	KURILE ARC / KURILE BASIN / YAGISHIRI	44.4256	141.429	s_YA-08 [6973]	BASALT [6973]	28.3461	-204.622	51.46	0.8	18.1			8.39	9.97	7.76	0.17	0.46	2.76	0.13		62.4743	1.22558	1216.43	1.03284	1313.43	0.97342			91.8519						4796	203.7	175		70				7.3	379	18.2	71	2.7
[6973]	KURILE ARC	KURILE ARC / KURILE BASIN / HOKKAIDO	43.5	141.2	s_TO-1 [6973]	BASALT [6973]	27.4243	-158.961	51.13	0.99	16.78			8.21	9.95	8.62	0.16	1.06	2.88	0.21		65.3966	1.90942	1212.19	1.10221	1300.61	1.06632			95.4762						5935.05	229	299		117				30	479	21	99	4.2
[6973]	KURILE ARC	KURILE ARC / KURILE BASIN / HOKKAIDO	43.5	141.2	s_TN-3 [6973]	BASALT [6973]	27.4243	-158.961	52.69	0.98	17.47			7.84	9.71	6.76	0.15	1.2	2.99	0.21		60.8157	1.81178	1200.56	0.965518	1176.82	0.934969			105.526						5875.1	215	132		54				36	491	22	100	3.8
[6973]	KURILE ARC	KURILE ARC / KURILE BASIN / HOKKAIDO	43.5	141.2	s_OF-6 [6973]	BASALT [6973]	27.4243	-158.961	51.29	0.97	16.94			8.01	10.03	8.53	0.14	0.97	2.9	0.21		65.7165	1.80662	1205.46	1.0543	1277.94	1.05141			77.4359						5815.15	224	255		119				25	489	19	92	3.9
[6973]	KURILE ARC	KURILE ARC / KURILE BASIN / HOKKAIDO	43.5	141.2	s_HA [6973]	BASALT [6973]	27.4243	-158.961	50.77	0.95	16.37			9.41	10.31	7.96	0.16	1.35	2.49	0.22		60.3589	1.89776	1253.32	1.30445	1448.14	1.09207			139.394						5695.25	249.1	202		71.6				40.5	500	22.9	91	3.3
[6973]	KURILE ARC	KURILE ARC / KURILE BASIN / HOKKAIDO	43.5	141.2	s_P-11 [6973]	BASALT [6973]	27.4243	-158.961	50.28	0.96	16.39			9.3	10.22	8.61	0.17	1.28	2.55	0.23		62.497	2.01496	1249.95	1.32893	1450.69	1.12179			134.286						5755.2	253.3	221		100.5				43.1	482	21.6	89	3.5
[6973]	KURILE ARC	KURILE ARC / KURILE BASIN / HOKKAIDO	43.5	141.2	s_F-35 [6973]	BASALT [6973]	27.4243	-158.961	52.41	0.89	16.33			8.72	9.36	8.09	0.16	1.23	2.61	0.2		62.5462	1.56701	1222.65	1.03982	1306.82	1.03057			185						5335.55	234.8	292		107.2				38.8	457	20.6	84	2.8
[6973]	KURILE ARC	KURILE ARC / KURILE BASIN / HOKKAIDO	43.5	141.2	s_MT-7 [6973]	BASALT [6973]	27.4243	-158.961	50.87	0.99	14.85			8.93	9.45	10.82	0.15	1.03	2.68	0.23		68.563	1.74893	1230.68	1.18041	1468.73	1.23077			79.2683						5935.05	218	462		196.4				31.5	459	19.4	94	4.1
[6973]	KURILE ARC	KURILE ARC / KURILE BASIN / HOKKAIDO	43.5	141.2	s_MT-9 [6973]	BASALT [6973]	27.4243	-158.961	49.54	1.01	17.41			9.39	9.75	8.54	0.16	1.18	2.74	0.29		62.079	2.3496	1255.72	1.43188	1433.3	1.08534			175						6054.95	228.6	214		98.4				38.9	543	23.5	97	3.2
[6973]	KURILE ARC	KURILE ARC / KURILE BASIN / HOKKAIDO	43.5	141.2	s_TK-01 [6973]	BASALT [6973]	27.4243	-158.961	52.44	1.03	16.58			8.57	9.46	7.35	0.14	1.38	2.81	0.24		60.6881	1.85976	1220.99	1.06301	1273.64	0.998636			77.9592						6174.85	215	201		86.6				34.9	517	20.2	104	4.9
[6973]	KURILE ARC	KURILE ARC / KURILE BASIN / HOKKAIDO	43.5	142	s_S-01-A [6973]	BASALT [6973]	29.6605	-143.276	52.96	0.77	15.84			8.83	9.49	8.3	0.17	0.83	2.69	0.11		62.8523	1.24402	1222.41	0.970484	1370.25	1.04954			62.5926						4616.15	217	316		174.7				23.3	227	19.8	80	2.7
[6973]	KURILE ARC	KURILE ARC / KURILE BASIN / HOKKAIDO	43.5	143.4	s_NA-08 [6973]	BASALT [6973]	31.8675	-115.552	51.03	1.06	17.36			8.71	9.52	8	0.17	1.05	2.83	0.27		62.3107	1.87477	1228.77	1.17687	1327.48	1.01924			52.0833						6354.7	216.5	251		123.9				31.4	397	26.3	103	4.8
[6973]	KURILE ARC	KURILE ARC / KURILE BASIN / HOKKAIDO	43.5	143.4	s_SP-08 [6973]	BASALT [6973]	31.8675	-115.552	51.91	1.04	17.25			8.77	9.66	7.47	0.17	0.83	2.68	0.22		60.5239	1.38273	1227.13	1.06671	1341.98	0.986394			74.0625						6234.8	216.7	247		91.9				23.3	352	23	94	3.2
[6973]	KURILE ARC	KURILE ARC / KURILE BASIN / HOKKAIDO	43.5	143.4	s_SP-03 [6973]	BASALT [6973]	31.8675	-115.552	50.57	1.07	17.04			9.15	9.21	8.79	0.17	1.04	2.68	0.27		63.359	1.82806	1241.08	1.25311	1394.4	1.06667			71.0256						6414.65	220.3	233		111.3				35.1	410	26.7	109	3.9
[7020]	KURILE ARC	KURILE ARC / KURILE ARC / HOKKAIDO / FUTAMATA VOLCANICS	43.5	142	s_SE-8 [7020]	BASALT [7020]	29.6605	-143.276	50.9	0.71	15.45			8.71	9.15	11.8	0.15	0.17	2.21	0.06		70.9182	0.717013	1219.66	0.974125	1486.84	1.20392									4256.45	217	848		312				3	228	21	85	0
[6271]	KURILE ARC	KURILE ARC / KURILE BASIN / HOKKAIDO / IWAO FORMATION	43.7072	141.362	s_D-1 [6271]	BASALT [6271]	28.1547	-165.743	50.59	0.96	16.77	4.84	3.62	7.97503	9.74	8.59	0.15	1.06	2.81	0.21		65.9725	1.97324	1206.97	1.07436	1269.48	1.05522			115.455						5755.2		305		121				31.1	480	21.3	96	3.3
[6271]	KURILE ARC	KURILE ARC / KURILE BASIN / HOKKAIDO / IWAO FORMATION	43.7072	141.362	s_D-3 [6271]	BASALT [6271]	28.1547	-165.743	51.37	0.98	16.66	4.09	4.44	8.12018	9.53	8.48	0.15	1.08	2.75	0.2		65.2749	1.75256	1208.02	1.03223	1267.81	1.04043			112.286						5875.1		306		121				30.9	475	21.1	99	3.5
[6271]	KURILE ARC	KURILE ARC / KURILE BASIN / HOKKAIDO / IWAO FORMATION	43.7328	141.344	s_TN-2 [6271]	BASALT [6271]	27.8236	-167.531	52.61	0.95	17.46	4.18	3.8	7.56116	9.38	6.57	0.14	1.18	2.97	0.21		60.9991	1.79214	1192.93	0.90651	1132.76	0.908007			110						5695.25		138		55				34.8	491	20.5	100	3.6
[6271]	KURILE ARC	KURILE ARC / KURILE BASIN / HOKKAIDO / HAMAMASU FORMATION	43.6561	141.357	s_P-4 [6271]	BASALT [6271]	28.1547	-165.743	50.61	0.95	16.48	3.82	4.85	8.28724	10.01	8.39	0.16	1.28	2.61	0.23		64.5682	1.98845	1218.05	1.12437	1302.94	1.07111			138.235						5695.25		234		85				41.4	487	21.6	89	3.4
[6271]	KURILE ARC	KURILE ARC / KURILE BASIN / HOKKAIDO / HAMAMASU FORMATION	43.6561	141.357	s_HA-1 [6271]	BASALT [6271]	28.1547	-165.743	50.67	0.95	16.42	3.56	5.2	8.40329	10.31	8	0.16	1.36	2.59	0.22		63.1488	2.03422	1223.1	1.14925	1319.63	1.06887			139.394						5695.25		202		72				40.5	500	22.9	91	3.3
[6691]	KURILE ARC	KURILE ARC / KURILE BASIN / HOKKAIDO	43	141	s_1 [6691]	BASALT, OLIVINE [6691]	26.195	-139.599	46.92	1.18	16.02	3.6	6.56	9.79928	10.29	10.37	0.1	0.77	2.61	0.09		65.5746	2.91439	1281.16	1.69069	1692.92	1.27285									7074.1
[6691]	KURILE ARC	KURILE ARC / KURILE BASIN / HOKKAIDO	43	141	s_4 [6691]	BASALT, AUGITE-OLIVINE [6691]	26.195	-139.599	48.21	1.11	18.32	2.69	5.39	7.81046	10.7	8.33	0.18	0.69	3.15	0.31		65.7503	2.83025	1215.74	1.30019	1319.93	1.05383									6654.45
[6691]	KURILE ARC	KURILE ARC / KURILE BASIN / HOKKAIDO	43	141	s_5 [6691]	BASALT, AUGITE-OLIVINE [6691]	26.195	-139.599	48.26	1.22	17.5	2.96	6.09	8.75341	10.24	8.26	0.17	0.7	2.52	0.25		62.9429	1.97118	1242.16	1.31776	1445.18	1.06639									7313.9
[6691]	KURILE ARC	KURILE ARC / KURILE BASIN / HOKKAIDO	43	141	s_6 [6691]	BASALT, AUGITE-OLIVINE [6691]	26.195	-139.599	48.84	1.05	17.64	3.54	5.34	8.52529	11.06	7.74	0.14	0.84	3.15	0.22		62.0378	2.72604	1237.51	1.37901	1420.58	1.07576									6294.75
[6691]	KURILE ARC	KURILE ARC / KURILE BASIN / HOKKAIDO / HAMAMASU BASALT	43	141	s_7 [6691]	BASALT, AUGITE-OLIVINE [6691]	26.195	-139.599	49.54	0.92	16.03	3.17	5.98	8.83237	9.73	8.2	0.18	1.27	2.64	0.62		62.5626	2.33763	1240.55	1.26294	1396.61	1.09494									5515.4
[6691]	KURILE ARC	KURILE ARC / KURILE BASIN / HOKKAIDO / ETAI-DAKE BASALT	43	141	s_14 [6691]	BASALT, AUGITE-OLIVINE [6691]	26.195	-139.599	49.1	0.9	15.67	3.59	6.61	9.84028	9.38	8.35	0.21	0.97	2.9	0.36		60.4336	2.45523	1274.97	1.47191	1584.6	1.13728									5395.5
[6691]	KURILE ARC	KURILE ARC / KURILE BASIN / HOKKAIDO / ETAI-DAKE BASALT	43	141	s_15 [6691]	BASALT, AUGITE-OLIVINE [6691]	26.195	-139.599	51.01	0.81	16.17	3.44	5.53	8.62531	9.12	7.32	0.18	1.3	3.06	0.21		60.4367	2.37323	1230.55	1.15652	1310.92	1.01916									4855.95
[6691]	KURILE ARC	KURILE ARC / KURILE BASIN / HOKKAIDO / ETAI-DAKE BASALT	43	141	s_16 [6691]	BASALT, OLIVINE-AUGITE [6691]	26.195	-139.599	52.1	1.04	16.5	2.04	5.7	7.53559	8.94	8.47	0.12	1.38	2.85	0.16		66.9225	1.96625	1188	0.930272	1148.6	1.01089									6234.8
[6691]	KURILE ARC	KURILE ARC / KURILE BASIN / HOKKAIDO / ETAI-DAKE BASALT	43	141	s_17 [6691]	BASALT, OLIVINE-AUGITE [6691]	26.195	-139.599	52.68	0.87	15.93	3.02	5.31	8.0274	8.58	8.16	0.08	1.46	2.89	0.17		64.661	1.9548	1200.95	0.940154	1188.21	1.01104									5215.65
[9509]	KURILE ARC	KURILE ARC / KURILE BASIN / HOKKAIDO	44	142.5	s_3 [9509]	NOT GIVEN [9509]	30.8807	-164.239	49.02	1.15	15.38	2.56	6.03	8.33349	12.16	7.8	0.16	0.25	1.83	0.09		62.7528	0.718671	1228.24	0.981493	1582.18	1.12678									6894.25
[9772]	KURILE ARC	KURILE ARC / KURILE BASIN / HOKKAIDO	44	144	s_2 [9772]	SPILITE [9772]	35.177	-136.149	47.4	1.14	15.35	3.11	6.29	9.08838	11.18	8.53	0.15	0.75	1.82	0.08		62.8171	1.50111	1258.27	1.2968	1628.36	1.18287									6834.3
[6973]	KURILE ARC	KURILE ARC / KURILE BASIN / HOKKAIDO	43.5	141.2	s_CSR-7 [6973]	BASALT [6973]	27.4243	-158.961	51.41	0.97	17.08			8.02	9.78	8.45	0.15	1.05	2.87	0.21		65.4757	1.82716	1205.65	1.05233	1255.41	1.03491			112.222						5815.15	224	305		117				31	481	22	96	3.6
[6973][6271]	KURILE ARC	KURILE ARC / KURILE BASIN / HOKKAIDO / IWAO FORMATION	43.7072	141.362	s_CSR-10 [6973]	BASALT [6973]	28.1547	-165.743	52.54	0.95	17.14	4.34	4.02	8.02	9.49	7.33	0.15	1.21	2.95	0.21		62.1948	1.814	1204.38	0.987773	1203.8	0.967336			124.865						5695.25		181		72				34.5	489	21.3	99	3.7
[6973][6271]	KURILE ARC	KURILE ARC / KURILE BASIN / HOKKAIDO / HAMAMASU FORMATION	43.6561	141.357	s_F-39 [6973]	BASALT [6973]	28.1547	-165.743	51.38	0.89	16.23	3.36	4.9	8.8	9.8	8.66	0.16	1.22	2.67	0.2		63.9167	1.80574	1228.4	1.14785	1360.68	1.0899			182.333						5335.55	234.5	288		106.4				38.9	460	20.1	83	3
[6973][6271]	KURILE ARC	KURILE ARC / KURILE BASIN / HOKKAIDO / HAMAMASU FORMATION	43.6561	141.357	s_MT-8 [6973]	BASALT [6973]	28.1547	-165.743	50.81	0.98	14.66	3.61	4.85	8.96	9.42	11.14	0.15	1.02	2.65	0.23		69.1162	1.72457	1230.98	1.18307	1482.26	1.25204			84.25						5875.1	221.3	512		204.2				30.2	451	18.9	93	4
[12149]	KURILE ARC	KURILE ARC / KURILE ARC / RISHIRI / RISHIRI / NUMAURA LAVA	45.1	141.27	s_NM-10 [12149]	BASALT, ALKALINE [12149]	31.2657	-248.109	48.9	1.32	17.19			9.76	9.5	8.16	0.17	0.64	3.31	0.27	-0.02	60.0785	2.64449	1272.12	1.55056	1580.2	1.09091			25.7463	4.0678	1.63051	5.7	1.15		7913.4		255		137				11.8	453	31.1	128	5.36	0.58
[12149]	KURILE ARC	KURILE ARC / KURILE ARC / RISHIRI / RISHIRI / NUMAURA LAVA	45.1	141.27	s_NM-44 [12149]	BASALT, ALKALINE [12149]	31.2657	-248.109	48.42	1.29	17.26			9.66	9.36	8.06	0.17	0.66	3.28	0.27	0.57	60.0298	2.86413	1272.63	1.56424	1564.34	1.08122			25.5083	3.77483	1.58278	5.72	1.02		7733.55		246		138				11.6	441	30.4	126	5.41	0.36
[12149]	KURILE ARC	KURILE ARC / KURILE ARC / RISHIRI / RISHIRI / ARARAGIYAMA LAVA	45.1	141.27	s_NM-1 [12149]	BASALT, ALKALINE [12149]	31.2657	-248.109	49.2	1.15	16.99			9.77	9.89	8.34	0.18	0.72	3.24	0.24	-0.32	60.5762	2.52929	1271.05	1.54104	1581.85	1.11497			31.3333	3.51916	1.55401	6.21	0.86		6894.25		302		141				15.9	374	28.3	105	4.5	0.59
[12149]	KURILE ARC	KURILE ARC / KURILE ARC / RISHIRI / RISHIRI / ARARAGIYAMA LAVA	45.1	141.27	s_NM-7 [12149]	BASALT, ALKALINE [12149]	31.2657	-248.109	48.7	1.2	17.21			9.83	9.66	8.33	0.18	0.67	3.17	0.25	0.12	60.4012	2.58695	1275.49	1.57582	1589.23	1.10395			28.4211	3.65854	1.56794	5.57	0.92		7194		293		141				12.8	384	28.9	111	4.75	0.54
[12149]	KURILE ARC	KURILE ARC / KURILE ARC / RISHIRI / RISHIRI / ARARAGIYAMA LAVA	45.1	141.27	s_NM-8 [12149]	BASALT, ALKALINE [12149]	31.2657	-248.109	48.55	1.21	17.18			9.83	9.87	8.25	0.18	0.6	3.15	0.25	-0.15	60.1702	2.53378	1276.56	1.58006	1610.66	1.10813			29.0188	3.58108	1.54392	5.07	0.88		7253.95		286		139				9.67	396	28.9	113	4.79	0.4
[12149]	KURILE ARC	KURILE ARC / KURILE ARC / RISHIRI / RISHIRI / ARARAGIYAMA LAVA	45.1	141.27	s_NM-9 [12149]	BASALT, ALKALINE [12149]	31.2657	-248.109	48.53	1.21	17.17			9.85	9.85	8.31	0.18	0.6	3.14	0.25	0.03	60.2951	2.5294	1276.9	1.58349	1613.18	1.11107			31.8182	3.82979	1.62411	5.36	0.91		7253.95		293		143				8.95	398	29.4	108	4.4	0.35
[12149]	KURILE ARC	KURILE ARC / KURILE ARC / RISHIRI / RISHIRI / ARARAGIYAMA LAVA	45.1	141.27	s_NM-13 [12149]	BASALT, ALKALINE [12149]	31.2657	-248.109	48.35	1.14	16.91			9.82	9.85	8.24	0.18	0.66	3.07	0.23	0.17	60.1655	2.60054	1277.77	1.57787	1613.1	1.11629			36.643	3.66197	1.55634	5.5	0.8		6834.3		302		145				12.2	384	28.7	103	4.23	0.47
[12149]	KURILE ARC	KURILE ARC / KURILE ARC / RISHIRI / RISHIRI / ARARAGIYAMA LAVA	45.1	141.27	s_NM-17 [12149]	BASALT, ALKALINE [12149]	31.2657	-248.109	49.97	1.03	16.58			9.38	9.44	8.44	0.17	0.73	3.23	0.24	-0.15	61.8265	2.24987	1254.27	1.36743	1506.38	1.09626			45.6633	4.15094	1.57736	5.93	0.87		6174.85		310		159				14.3	394	26.3	104	3.92	0.39
[12149]	KURILE ARC	KURILE ARC / KURILE ARC / RISHIRI / RISHIRI / ARARAGIYAMA LAVA	45.1	141.27	s_NM-23 [12149]	BASALT, ALKALINE [12149]	31.2657	-248.109	48.96	1.05	16.9			9.45	9.36	8.03	0.18	0.66	3	0.24	1.18	60.4669	2.24758	1261.88	1.40532	1521.25	1.06894			47.0284	4.29603	1.61733	6.06	1.02		6294.75		300		135				17.6	395	26.8	106	3.87	0.87
[12149]	KURILE ARC	KURILE ARC / KURILE ARC / RISHIRI / RISHIRI / ARARAGIYAMA LAVA	45.1	141.27	s_NM-24 [12149]	BASALT, ALKALINE [12149]	31.2657	-248.109	49.63	1.04	16.74			9.41	9.39	8.29	0.17	0.73	3.19	0.24	0.01	61.3266	2.31771	1257.63	1.39431	1508.32	1.08602			48.2759	4.05594	1.52797	6.61	0.96		6234.8		307		148				18.8	400	27.4	103	3.77	0.41
[12149]	KURILE ARC	KURILE ARC / KURILE ARC / RISHIRI / RISHIRI / ARARAGIYAMA LAVA	45.1	141.27	s_SN-1 [12149]	BASALT, ALKALINE [12149]	31.2657	-248.109	48.97	1.07	16.95			9.71	9.4	8.48	0.18	0.72	3.18	0.26	0.25	61.1196	2.54774	1269.68	1.51568	1556.63	1.10451			39.5785	3.96552	1.54828	6	0.94		6414.65		292		158				16.5	393	28	106	4.27	0.79
[12149]	KURILE ARC	KURILE ARC / KURILE ARC / RISHIRI / RISHIRI / ARARAGIYAMA LAVA	45.1	141.27	s_SN-2 [12149]	BASALT, ALKALINE [12149]	31.2657	-248.109	49.17	1.07	17.06			9.62	9.46	8.09	0.18	0.76	3.21	0.25	0.42	60.2183	2.55444	1267.41	1.49091	1532.58	1.0817			42.5428	4.17266	1.55755	5.88	0.9		6414.65		283		142				18.2	392	27.9	104	4.09	0.87
[12149]	KURILE ARC	KURILE ARC / KURILE ARC / RISHIRI / RISHIRI / ARARAGIYAMA LAVA	45.1	141.27	s_SN-15 [12149]	BASALT, ALKALINE [12149]	31.2657	-248.109	50.18	1.01	16.55			9.37	9.3	8.64	0.17	0.75	3.12	0.23	-0.19	62.4027	2.08592	1252.19	1.33438	1492.8	1.09582			46.3215	4.19231	1.55769	8.55	0.88		6054.95		312		171				19.8	388	25.7	100	3.67	0.97
[12149]	KURILE ARC	KURILE ARC / KURILE ARC / RISHIRI / RISHIRI / ARARAGIYAMA LAVA	45.1	141.27	s_SN-16 [12149]	BASALT, ALKALINE [12149]	31.2657	-248.109	49.74	1.03	16.53			9.4	9.4	8.4	0.17	0.72	3.17	0.24	0.26	61.6639	2.24512	1255.76	1.37057	1513.42	1.0957			46.9072	4.22053	1.53992	7.15	0.87		6174.85		312		160				16.3	391	26.8	104	3.88	0.66
[12149]	KURILE ARC	KURILE ARC / KURILE ARC / RISHIRI / RISHIRI / LATER L-2 STAGE LAVA	45.1	141.27	s_SN-29 [12149]	BASALT, ALKALINE [12149]	31.2657	-248.109	50.21	1.21	17.29			8.47	9.61	7.48	0.16	0.79	3.21	0.36	0.58	61.3842	2.21914	1228	1.20537	1355.54	1.00918			39.0625	6.28571	1.72653	4.86	1.17		7253.95		215		96.3				20.8	574	26.3	135	5.76	0.99
[11161]	KURILE ARC	KURILE ARC / KURILE ARC / HOKKAIDO / SHIRETOKOMISAKI FORMATION	44.2	145.1	s_M-201 [11161]	BASALT, OLIVINE-AUGITE [11161]	37.643	-125.348	50.69	0.79	17.62			7.79	10.61	6.91	0.17	1.2	2.34	0.27		61.489	1.6296	1206.18	1.00813	1208.31	0.964218									4736.05
[13531]	KURILE ARC	KURILE ARC / KURILE ARC / HOKKAIDO / ETAI.DAKE	43.7	141.55	s_314 [13531]	BASALT, OLIVINE-AUGITE [13531]	28.7747	-162.144	48.79	0.95	16.6	3.38	5.67	8.71132	9.17	9.24	0.17	1.07	2.7	0.21		65.6268	2.45473	1236.26	1.29853	1380.71	1.10946									5695.25
[13580]	KURILE ARC	KURILE ARC / KURILE BASIN / HOKKAIDO / TAKIKAWA VOLCANO GROUP	43.5	141.5	s_87050331-1 [13580]	BASALT [13580]	28.3921	-153.079	50.88	1.09	16.39			8.44	9.8	9.64	0.16	1.07	2.29	0.25		67.2767	1.43269	1216.29	1.07718	1340.98	1.11168									6534.55
[13580]	KURILE ARC	KURILE ARC / KURILE BASIN / HOKKAIDO / TAKIKAWA VOLCANO GROUP	43.5151	142.01	s_87050220 [13580]	BASALT [13580]	29.6605	-143.276	49.19	1.26	17.72			8.88	11.2	7.81	0.17	0.88	2.6	0.28		61.2869	1.95645	1244.92	1.35496	1456.7	1.07158			111.194						7553.7	344	185		74.2				25.3	493.4	26.8	94.1	3.1
[13580]	KURILE ARC	KURILE ARC / KURILE BASIN / HOKKAIDO / TAKIKAWA VOLCANO GROUP	43.5	141.5	s_87050217 [13580]	BASALT [13580]	28.3921	-153.079	51.78	0.98	17.56			8.23	10.21	7.34	0.16	1.01	2.5	0.23		61.6174	1.4032	1212.48	1.01109	1262.45	0.974954									5875.1
[13580]	KURILE ARC	KURILE ARC / KURILE BASIN / HOKKAIDO / TAKIKAWA VOLCANO GROUP	43.5281	141.946	s_87050228 [13580]	BASALT [13580]	29.4397	-145.231	49.29	1.25	17.59			8.77	11.34	7.59	0.17	0.9	2.8	0.29		60.9041	2.17647	1242.36	1.35621	1451.05	1.07274									7493.75	358.9	184.9		63.5				23.1	486.9	23.9	94.6
[13580]	KURILE ARC	KURILE ARC / KURILE BASIN / HOKKAIDO / TAKIKAWA VOLCANO GROUP	43.7562	142.098	s_87050110 [13580]	BASALT [13580]	30.0912	-158.995	49.78	1.25	17.77			8.54	11.3	7.21	0.16	1.23	2.27	0.48		60.3123	1.80678	1232.86	1.23696	1355.31	1.02713			104.132						7493.75	390.6	143.1		60.1				37.6	640.5	27.4	107	3.8
[13580]	KURILE ARC	KURILE ARC / KURILE BASIN / HOKKAIDO / TAKIKAWA VOLCANO GROUP	43.5	141.5	s_87050107 [13580]	BASALT [13580]	28.3921	-153.079	50.86	0.98	16.43			8.66	9.62	10.13	0.16	1.05	1.86	0.26		67.7995	1.07737	1220.2	1.04803	1353.32	1.11886									5875.1
[13580]	KURILE ARC	KURILE ARC / KURILE BASIN / HOKKAIDO / TAKIKAWA VOLCANO GROUP	43.8634	142.121	s_TAKA-1 [13580]	BASALT [13580]	30.058	-164.968	48.29	1.28	16.05			9.52	10.68	10.62	0.18	0.84	2.26	0.27		66.7551	1.81664	1262.34	1.48898	1627.06	1.26005			92.3421						7673.6	326.1	501.8		186.6				22.4	420.3	23.9	98.1	3.8
[13580]	KURILE ARC	KURILE ARC / KURILE BASIN / HOKKAIDO / TAKIKAWA VOLCANO GROUP	43.5	141.5	s_87050106-1 [13580]	BASALT [13580]	28.3921	-153.079	50.35	1.05	16.44			9.06	9.2	10.73	0.17	1.08	1.69	0.23		68.0694	1.04393	1232.51	1.1298	1398.73	1.14489									6294.75
[13580]	KURILE ARC	KURILE ARC / KURILE BASIN / HOKKAIDO / TAKIKAWA VOLCANO GROUP	43.5	141.5	s_87050102 [13580]	BASALT [13580]	28.3921	-153.079	51.47	1.06	17.39			8.32	10.09	8.06	0.15	0.89	2.28	0.29		63.5535	1.18641	1212.99	0.999218	1294.24	1.00476									6354.7
[2541]	KURILE ARC	KURILE ARC / KURILE ARC / HOKKAIDO / KITAMI RHYOLITE	43.7	143	s_100501 [2541]	BASALT [2541]	31.6908	-136.239	50.4	1.1	16.7	9.54		8.58409	10	8.32	0.16	0.7	2.79	0.21		63.5651	1.64596	1226.91	1.1419	1404.17	1.06479			37.6087	4.26778	1.66109				6594.5								19.4	367	23.1	103	4.6	0.97
[2541]	KURILE ARC	KURILE ARC / KURILE ARC / HOKKAIDO / KITAMI RHYOLITE	43.7	143	s_100502 [2541]	BASALT [2541]	31.6908	-136.239	53	1.11	16.1	9.22		8.29616	8.78	6.94	0.16	0.84	3.67	0.21		60.0919	2.03401	1213.27	0.997225	1293.27	0.973163			38.4615	4.27562	1.57597				6654.45								23.6	313	27	138	5.07	1.03
[12170]	KURILE ARC	KURILE ARC / KURILE ARC / ITURUP (ITIRUP) / MENSHOI BRAT	45.33	148.87	s_ME51 [12170]	BASALT [12170]	40.6265	-79.6145	50.6	0.63	16.1			9.1	10.9	9.07	0.13	0.35	1.93	0.11		64.2099	0.684	1238.81	1.04615	1540.58	1.12494									3776.85
[12170]	KURILE ARC	KURILE ARC / KURILE ARC / ITURUP (ITIRUP) / MENSHOI BRAT	45.33	148.87	s_ME65 [12170]	BASALT [12170]	40.6265	-79.6145	51.8	0.7	16.07			9.26	10.15	7.94	0.14	0.44	2.16	0.1		60.6827	0.768182	1240.91	0.998719	1494.87	1.04765									4196.5
[12170]	KURILE ARC	KURILE ARC / KURILE ARC / ITURUP (ITIRUP) / MENSHOI BRAT	45.33	148.87	s_ME50 [12170]	BASALT [12170]	40.6265	-79.6145	52.4	0.65	16.1			8.97	9.9	8.7	0.14	0.41	2.15	0.1		63.581	0.697191	1226.28	0.914165	1436.42	1.05743									3896.75
[14714]	KURILE ARC	KURILE ARC / KURILE ARC / ITURUP (ITIRUP) / KUDRYAVYI (KUDRYAVY)	45.33	148.87	s_KY-AL-1 [14714]	BASALT [14714]	40.6265	-79.6145	49.56	0.38	12.32			8.89	14.58	11.15	0.2	0.07	0.7	0.02		69.3025	0.0903811	1237.64	0.811821	1937.82	1.45802			183	0.827273	1.62727		0.07		2278.1								2.24		9.91	10.17	0.1
[3313]	KURILE ARC	KURILE ARC / KURILE ARC / PARAMUSHIR / EBEKO	50.68	156	s_1098D [3313]	BASALT [3313]	39.1308	-86.3655	48.07	1.1	18.29	3.05	6.04	8.78439	11.58	7.35	0.02	1.09	2.14	0.25	0.75	60.0971	2.05777	1248.49	1.38328	1418.81	1.04504									6594.5
[3313]	KURILE ARC	KURILE ARC / KURILE ARC / PARAMUSHIR / EBEKO	50.68	156	s_1098G [3313]	BASALT [3313]	39.1308	-86.3655	48.11	0.83	17.49	5.39	4.35	9.19992	11.05	8.34	0.02	1.02	2.41	0.23	0.93	62.0025	2.30233	1259.26	1.46691	1490.67	1.11553									4975.85
[3406]	KURILE ARC	KURILE ARC / KURILE ARC / HOKKAIDO / SHOKAM(N)BETSU-DAKE	43.7	141.55	s_E2 [3406]	ANDESITE [3406]	28.7747	-162.144	52.2	0.96	16.24			7.92	8.9	8.18	0.15	1.38	2.86	0.2		65.0238	1.95409	1200.05	0.966631	1193.97	1.01339									5755.2
[3919]	KURILE ARC	KURILE ARC / KURILE ARC / HOKKAIDO	44.4	142.5	s_2 [3919]	BASALT, AUGITE-OLIVINE [3919]	30.4144	-189.008	49.3	0.87	17.05	3.2	6.44	9.31936	10.2	8.09	0.22	0.45	2.28	0.19		60.9764	1.183	1254.62	1.2448	1526.1	1.06042									5215.65
[3919]	KURILE ARC	KURILE ARC / KURILE ARC / HOKKAIDO	44.4	142.5	s_6 [3919]	BASALT, AUGITE-OLIVINE [3919]	30.4144	-189.008	50.98	1.01	16.65	2.86	6.81	9.38343	9.2	8.04	0.23	0.61	2.53	0.19		60.6654	1.23554	1247.73	1.1523	1467.42	1.03108									6054.95
[3542]	KURILE ARC	KURILE ARC / KURILE ARC / RISHIRI / RISHIRI	45.1	141.27	s_4 [3542]	BASALT, OLIVINE-AUGITE [3542]	31.2657	-248.109	50.69	1.28	16.59	4.06	5.01	8.66319	10	7.34	0.1	1.03	3.49	0.14		60.3972	2.65675	1233.88	1.27064	1397.69	1.05174									7673.6
[3967]	KURILE ARC	KURILE ARC / KURILE BASIN / YAGISHIRI	44	141	s_YA-3 [3967]	NOT GIVEN [3967]	26.8873	-188.28	50.67	0.77	17.35	9.41		8.46712	10.25	8.32	0.16	0.61	2.47	0.12		63.8823	1.23682	1221.34	1.06595	1358.01	1.03417									4616.15
[3967]	KURILE ARC	KURILE ARC / KURILE BASIN / YAGISHIRI	44	141	s_YA-6 [3967]	NOT GIVEN [3967]	26.8873	-188.28	48.67	0.85	16.09	9.79		8.80904	11.04	10.43	0.18	0.5	2.08	0.11		68.0636	1.17397	1237.74	1.22547	1551.84	1.22087									5095.75
[3967]	KURILE ARC	KURILE ARC / KURILE BASIN / YAGISHIRI	44	141	s_YA-7 [3967]	NOT GIVEN [3967]	26.8873	-188.28	49.17	0.86	16.18	9.64		8.67407	11.31	10.41	0.18	0.49	2.11	0.11		68.3567	1.09562	1231.17	1.1802	1531.49	1.21643									5155.7
[3967]	KURILE ARC	KURILE ARC / KURILE BASIN / YAGISHIRI	44	141	s_YA-10 [3967]	NOT GIVEN [3967]	26.8873	-188.28	49.98	0.89	16.81	9.84		8.85403	10.57	8.23	0.22	0.57	2.29	0.13		62.5908	1.17186	1236.9	1.14022	1461.16	1.06963									5335.55
[3967]	KURILE ARC	KURILE ARC / KURILE BASIN / YAGISHIRI	44	141	s_YA-20 [3967]	NOT GIVEN [3967]	26.8873	-188.28	50.26	0.85	17.17	9.59		8.62908	10.89	8.66	0.2	0.52	2.27	0.11		64.3678	1.07219	1227.39	1.10435	1430.34	1.07821									5095.75
[4036]	KURILE ARC	KURILE ARC / KURILE ARC / HOKKAIDO / KOITOI LAVA	43.5	142	s_OT-2 [4036]	NOT GIVEN [4036]	29.6605	-143.276	52.63	0.55	13.11			9.18	9.4	12.47	0.18	0.67	1.75	0.06		70.9732	0.608141	1227.4	0.889302	1561.37	1.31032									3297.25								17	106
[17697]	KURILE ARC	KURILE ARC / KURILE ARC / KUNASHIR	43	145	s_R-76/10 [17697]	BASALT [17697]	25.1402	-48.0267	51.03	0.68	17.21			13.26	1.31	13.55	0.37	0.11	2.37	0.05		64.7809	0.765928	1345.92	1.51623	1776.65	1.08684			208.333	2.19277	1.77108				4076.6								3.5	19	8.6	14.9	0.24	1.92
[4198]	KURILE ARC	KURILE ARC / KURILE ARC / HOKKAIDO / MOBETSU FORMATION	44	143.5	s_KY-635 [4198]	BASALT, OLIVINE [4198]	32.9622	-146.067	52.06	1.26	17.61			7.71	8.66	6.84	0.13	0.78	3.13	0.27	1.84	61.4924	1.68743	1197.1	0.919934	1179.12	0.898364									7553.7
[4198]	KURILE ARC	KURILE ARC / KURILE ARC / HOKKAIDO / MONBETSU BASALT	44.2	143.4	s_MO-BAS [4198]	BASALT, OLIVINE-CLINOPYROXENE [4198]	32.4407	-161.239	51.78	1.15	17.57			7.56	8.67	7.03	0.13	0.6	2.99	0.26	2.09	62.6002	1.46789	1192.13	0.867443	1175.3	0.898122									6894.25
[4198]	KURILE ARC	KURILE ARC / KURILE ARC / HOKKAIDO / SHANAFUCHI FORMATION	43.8	143.3	s_KY-611 [4198]	BASALT, OLIVINE [4198]	32.3819	-136.791	50.31	1.11	17.21			8.88	9.84	8.9	0.14	0.71	2.6	0.21	0.66	64.3373	1.49878	1234.02	1.19868	1418.94	1.07398									6654.45
[4198]	KURILE ARC	KURILE ARC / KURILE ARC / HOKKAIDO / SHANAFUCHI FORMATION	44	143.5	s_KY-372 [4198]	BASALT, OLIVINE [4198]	32.9622	-146.067	50.19	1.23	17.62			8.32	10.16	7.62	0.14	0.54	2.63	0.21	1.84	62.2436	1.39762	1221.06	1.08939	1359.64	0.99722									7373.85
[4198]	KURILE ARC	KURILE ARC / KURILE ARC / HOKKAIDO / SHANAFUCHI FORMATION	44	143.5	s_KY-251 [4198]	BASALT, OLIVINE-CLINOPYROXENE [4198]	32.9622	-146.067	51.17	1.28	17.66			8.02	10.81	6.89	0.13	0.41	2.61	0.13	0.91	60.7286	1.11633	1210.25	0.970432	1336.67	0.96372									7673.6
[4198]	KURILE ARC	KURILE ARC / KURILE ARC / HOKKAIDO / SHANAFUCHI FORMATION	44	143.5	s_KY-463 [4198]	BASALT, OLIVINE-CLINOPYROXENE [4198]	32.9622	-146.067	50.49	1.14	16.57			8.72	9.56	8.41	0.13	0.67	2.41	0.2	1.5	63.4504	1.26654	1228.98	1.07669	1406.21	1.04801									6834.3
[12740]	KAMCHATKA ARC	KAMCHATKA ARC / KAMCHATKA ARC / CENTRAL KAMCHATKA SEGMENT	60.33	161.92	s_8158 [12740]	ANDESITE, BASALTIC [12740]			52.71	0.97	16.25			7.98	7.58	9.74	0.31	0.62	2.79	0.17		68.7206	1.19754	1191.87	0.82922	1220.9	1.01725	5.52473		46.6033	5.48408	2.01274	19.17	1.02	27.9	5815.15	154.14	485.65	42	170.86				16.27	318	16.96	97.31	4.21	0.65
[3048]	KAMCHATKA ARC	KAMCHATKA ARC / KAMCHATKA BACK ARC / SREDINNY RIDGE / ICHINSKY(ICHINSKII)	55.72	157.75	s_6446/1 [3048]	BASALT, OLIVINE-PLAGIOCLASE [3048]			51.38	0.94	16.29	2.95	6.41	9.06441	9.25	7.78	0.18	1.2	2.85	0.22	0.22	60.7064	1.95734	1239.06	1.18196	1373.51	1.04126	5.71429		63.5714	5.21951				31.5	5635.3	180	346	36	103				13	541	18	137	7	0.36
[13358]	KAMCHATKA ARC	KAMCHATKA ARC / KAMCHATKA ARC / EASTERN KAMCHATKA SEGMENT	58.92	164.33	s_155/87 [13358]	BASALT [13358]			47.4	0.52	14.74			9.12	11.38	9.68	0.18	0.6	2.12	0.06	2.66	65.642	1.68145	1258.53	1.33197	1674.7	1.27479	5.72776		1212.89	3.33987	1.77778	12.78	0.41	56.2	3117.4	321.9	325.53	49.02	99.5				6.29	673.49	16.63	40.39	0.45	0.23
[12740]	KAMCHATKA ARC	KAMCHATKA ARC / KAMCHATKA ARC / CENTRAL KAMCHATKA SEGMENT	57.1	156.56	s_110/00 [12740]	BASALT [12740]			51.97	0.86	15.75			8.41	9.11	8.85	0.3	0.48	3.19	0.15		65.4478	1.50155	1213.11	0.991977	1374.54	1.07222	5.85549		47.4637	6.38217	1.67516	31.05	1.27	25.95	5155.7	151.95	405.12	35.48	104.32				6.99	343.14	16.63	95.44	3.58	3.19
[15438]	KAMCHATKA ARC	KAMCHATKA ARC / KAMCHATKA ARC / SOUTHERN KAMCHATKA SEGMENT / NACHIKI(NSKY)	57.865	162.506	s_P-74-02 [15438]	BASALT [15438]			48.48	2.07	16.17			9.64	8.21	8.15	0.14	1.14	3.14	0.33		60.3455	3.34277	1269.9	1.52764	1537.39	1.0878	6.10465	0.382993	7.10784	7.85714	2.28571	8.3		34.4	12409.6	210	248	47.2	158.1	56.3	87	20.8	10.6	557	22.2	147	20.4	0.3
[12740]	KAMCHATKA ARC	KAMCHATKA ARC / KAMCHATKA ARC / CENTRAL KAMCHATKA SEGMENT	57	157.5	s_4482 [12740]	BASALT [12740]			50.57	1.22	17.07			7.8	9.35	9.3	0.17	0.9	2.67	0.07		68.2152	1.68361	1199.05	1.0298	1251.53	1.05401	6.18415		59.3723	4.71859	1.65829	12.71	0.75	27.26	7313.9	168.58	477.31	40.72	142.85				18.49	272.14	17.84	95.66	3.68	0.38
[2485]	KAMCHATKA ARC	KAMCHATKA ARC / KAMCHATKA ARC / CENTRAL KAMCHATKA SEGMENT / KLYUCHEVSKOY	56.05	160.63	s_K-12-4 [2485]	BASALT [2485]	49.2072	-124.087	51.25	0.79	13.41			8.53	10	11.76	0.16	0.55	2.31	0.12		71.2775	0.991467	1216.69	0.953272	1539.02	1.30559	6.19512	0.8						41	4736.05	254	913		199	48	76	13	9	233	18	60	0
[3048]	KAMCHATKA ARC	KAMCHATKA ARC / KAMCHATKA ARC / CENTRAL KAMCHATKA SEGMENT / KHARCHINSKY	56.65	161.4	s_5606 [3048]	BASALT, OLIVINE-CLINOPYROXENE [3048]	33.2484	-100.156	49.52	0.89	13.96	4	5.2	8.7992	9.26	12.05	0.18	1.04	2.85	0.2	0.16	71.1399	2.32087	1235.51	1.29696	1519.27	1.33744	6.25			3.85093				36	5335.55	225	826	47.6	235				11	488	17	112		0.12
[7640]	KAMCHATKA ARC	KAMCHATKA ARC / KAMCHATKA ARC / CENTRAL KAMCHATKA SEGMENT / KHARCHINSKY	56.65	161.4	s_5606GG [7640]	BASALT, OLIVINE-CLINOPYROXENE [7640]	33.2484	-100.156	49.52	0.89	13.96	4	5.2	8.7992	9.26	12.05	0.18	1.04	2.85	0.2	0.4	71.1399	2.32087	1235.51	1.29696	1519.27	1.33744	6.25			3.875				36	5335.55	225	826	48	235				11	488	17	112		0.12
[15897]	KAMCHATKA ARC	KAMCHATKA ARC / KAMCHATKA ARC / CENTRAL KAMCHATKA SEGMENT / KHARCHINSKY	56.65	161.4	s_5606G [15897]	BASALT [15897]	33.2484	-100.156	49.52	0.89	13.96	4	5.2	8.7992	9.26	12.05	0.18	1.04	2.85	0.2		71.1399	2.32087	1235.51	1.29696	1519.27	1.33744	6.25			3.85093				36	5335.55	225	826	47.6	235				11	488	17	112		0.12
[4648]	KAMCHATKA ARC	KAMCHATKA ARC / KAMCHATKA ARC / EASTERN KAMCHATKA SEGMENT / KORNILOVSKAYA	55.5	162.2	s_112G [4648]	BASALT, ALKALINE [4648]	32.8129	-40.3663	47.68	1.75	15.2	1.62	6.71	8.16768	8.55	10.26	0.18	1.37	2.6	0.38	1.69	69.3356	3.36771	1224.9	1.29886	1370.72	1.18942	6.25714		17.6111	9.1				35	10491.2	219	241	36	160				16	621	22	160	18	0.43
[21026]	KAMCHATKA ARC	KAMCHATKA ARC / KAMCHATKA ARC / CENTRAL KAMCHATKA SEGMENT / KLYUCHEVSKOY	56.05	160.63	s_12KY3-1 [21026]	BASALT [21026]	49.2072	-124.087	50.896	0.803	13.144			8.42	10.195	11.103	0.169	0.552	2.339	0.122		70.3577	1.0585	1216.57	0.938899	1546.66	1.29353	6.30104							38.919	4813.99	245.23	771.919	42.64	181.323				11.266	239.727	17.637	61.133
[21026]	KAMCHATKA ARC	KAMCHATKA ARC / KAMCHATKA ARC / CENTRAL KAMCHATKA SEGMENT / KLYUCHEVSKOY	56.05	160.63	s_12KY3-2 [21026]	BASALT [21026]	49.2072	-124.087	51.399	0.806	13.372			8.46	10.038	11.274	0.169	0.56	2.372	0.126		70.5772	1.02353	1214.76	0.929866	1525.16	1.28278	6.36349							38.279	4831.97	243.588	775.793	42.8	186.252				11.324	243.882	18.459	60.098
[21026]	KAMCHATKA ARC	KAMCHATKA ARC / KAMCHATKA ARC / CENTRAL KAMCHATKA SEGMENT / KLYUCHEVSKOY	56.1528	160.792	s_12KY2-2 [21026]	BASALT [21026]	46.7321	-113.085	51.097	0.794	13.211			8.52	9.981	11.457	0.17	0.55	2.328	0.125		70.7644	1.02296	1217.75	0.946986	1546.9	1.30005	6.45447		168.862	2.37115	1.75858			37.408	4760.03	241.449	774.847	41.119	193.064				11.715	240.916	18.095	59.384	1.242	0.258
[21026]	KAMCHATKA ARC	KAMCHATKA ARC / KAMCHATKA ARC / CENTRAL KAMCHATKA SEGMENT / KLYUCHEVSKOY	56.1531	160.791	s_12KY4-1 [21026]	BASALT [21026]	46.7321	-113.085	51.602	0.823	13.769			8.5	10.029	10.55	0.168	0.582	2.469	0.13		69.0797	1.08214	1214.83	0.930585	1499.67	1.23544	6.45485							37.41	4933.88	241.476	679.089	40.624	161.864				11.292	247.41	18.223	61.496
[12904]	KAMCHATKA ARC	KAMCHATKA ARC / KAMCHATKA ARC / CENTRAL KAMCHATKA SEGMENT / KLYUCHEVSKOY	56.0853	160.481	s_KLV 5/8 [12904]	ANDESITE, BASALTIC [12904]	50.6317	-131.274	51.48	0.81	13.87			8.55	9.78	11.3	0.17	0.56	2.36	0.14		70.405	1.00547	1216.73	0.950913	1504.95	1.25813	6.48396	1.21293	219.1					37.4	4855.95	242.5	807.2		180.7	76.9	73.1	15.3	8.5	244.1	16.7	63.4	1
[2485]	KAMCHATKA ARC	KAMCHATKA ARC / KAMCHATKA ARC / CENTRAL KAMCHATKA SEGMENT / KLYUCHEVSKOY	56.05	160.63	s_K-23-81959 [2485]	BASALT [2485]	49.2072	-124.087	51.98	0.93	15.75			8.45	10.11	8.28	0.16	0.66	2.91	0.14		63.8178	1.41925	1217.04	1.00121	1396.97	1.07663	6.525	1.05195	106					40	5575.35	261	371		84	81	83	15	9	284	19	77	2
[22592]	KAMCHATKA ARC	KAMCHATKA ARC / KAMCHATKA ARC / CENTRAL KAMCHATKA SEGMENT / KLYUCHEVSKOY	56.05	160.63	s_KL-05 [22592]	BASALT [22592]	49.2072	-124.087	52.1	0.81	13.32			8.84	10.17	11.67	0.16	0.64	2.17	0.12		70.3813	0.867703	1222.16	0.944955	1562.55	1.30418	6.56757		152.756	2.42331	1.78528	6.61	0.4	37	4855.95	243	746		181			14	8.41	239	15.53	57.1	1.27	0.34
[10896][10990]	KAMCHATKA ARC	KAMCHATKA ARC / KAMCHATKA ARC / CENTRAL KAMCHATKA SEGMENT / KLYUCHEVSKOY	56.05	160.63	s_K1938 [10896] / s_KHU-3(K1938) [10990]	NOT GIVEN [10896] / BASALT [10990]	49.2072	-124.087	51.62	0.82	13.86	9.64		8.67407	10.11	10.9	0.17	0.59	2.58	0.12	-0.31	69.3431	1.16577	1221.9	1.00473	1532.49	1.26049	6.63957	1.25373	263.333	2.22917				36.9	4915.9	245	757		170	84	76	14	9.4	263	20	67	0.9	0.3
[21026]	KAMCHATKA ARC	KAMCHATKA ARC / KAMCHATKA ARC / CENTRAL KAMCHATKA SEGMENT / KLYUCHEVSKOY	56.0183	160.809	s_11KY112 [21026]	ANDESITE, BASALTIC [21026]	44.7769	-108.461	52.114	0.825	15.031			8.4	10.003	9.169	0.167	0.583	2.693	0.13		66.2707	1.17755	1211.73	0.927502	1415.14	1.12481	6.64351							35.903	4945.88	238.522	385.529	37.825	105.057				12.099	290.098	17.994	63.775
[4276][3509]	KAMCHATKA ARC	KAMCHATKA ARC / KAMCHATKA ARC / CENTRAL KAMCHATKA SEGMENT / KLYUCHEVSKOY	56.05	160.63	s_KLU-05 [4276]	BASALT [4276] / ANDESITE, BASALTIC [3509]	49.2072	-124.087	52.5	0.99	16.35	2.29	6.51	8.61	9.37	7.49	0.16	0.79	3.18	0.19	0.48	61.0266	1.65904	1221.33	1.03202	1346.26	1.0076	6.68571	0.747475	152.353	3.50262	1.60733	9.1	0.62	35	5935.05	234	240	39	106	74	80	18	12	315	18	99	1.7	0.46
[20025]	KAMCHATKA ARC	KAMCHATKA ARC / KAMCHATKA ARC / CENTRAL KAMCHATKA SEGMENT / TOLBACHIK	55.6886	160.247	s_1975, NV [20025]	BASALT [20025]	49.8102	-135.807	51.25	0.96	13.9			9.2	11.2	9.8	0.18	0.9	2.5	0.23		65.7228	1.40121	1241.25	1.15748	1615.57	1.2707	6.70762	1.74157	120.707	3.53061	1.89286	7	0.65	40.7	5755.2	273	218	43.3	110	155	83	15.3	19.2	298	21	89	1.98	0.52
[2485]	KAMCHATKA ARC	KAMCHATKA ARC / KAMCHATKA ARC / CENTRAL KAMCHATKA SEGMENT / KLYUCHEVSKOY	56.05	160.63	s_K-9-80-7023 [2485]	BASALT [2485]	49.2072	-124.087	51.67	0.82	13.89			8.49	10.11	11.04	0.16	0.58	2.4	0.12		70.0656	1.02427	1215.06	0.943868	1502.4	1.25405	6.73684	1.48438	110					38	4915.9	256	787		172	95	95	13	8	243	19	64	2
[22592]	KAMCHATKA ARC	KAMCHATKA ARC / KAMCHATKA ARC / CENTRAL KAMCHATKA SEGMENT / KLYUCHEVSKOY	56.05	160.63	s_KL-03 [22592]	BASALT [22592]	49.2072	-124.087	51.82	0.83	13.34			8.85	10.27	11.86	0.16	0.58	2.17	0.12		70.6934	0.857426	1223.6	0.965863	1583.55	1.31945	6.74286		162.903	2.28834	1.74847	6.89	0.36	35	4975.85	236	760		186			14	7.67	242	15.26	58.25	1.24	0.29
[22589]	KAMCHATKA ARC	KAMCHATKA ARC / KAMCHATKA ARC / CENTRAL KAMCHATKA SEGMENT / KAMEN	56.0005	160.513	s_KAM-08-01 [22589]	ANDESITE, BASALTIC [22589]	49.3834	-128.103	52.96	0.9	15.11			8.67	9.69	8.78	0.17	0.75	2.81	0.16		64.5747	1.27245	1217.61	0.95069	1405.47	1.09864	6.75676	0.780488	175.472	3.17677	1.77273	9.91	0.45	37	5395.5	250	414	39	106	64	79	16	12.78	277	17.96	82	1.59	0.46
[7640]	KAMCHATKA ARC	KAMCHATKA ARC / KAMCHATKA ARC / CENTRAL KAMCHATKA SEGMENT / KHARCHINSKY	56.65	161.4	s_5601GG [7640]	BASALT, OLIVINE-CLINOPYROXENE [7640]	33.2484	-100.156	50.78	0.86	13.89	4.92	4.18	8.60702	8.86	11.03	0.17	1.09	2.87	0.19	0.66	69.7586	2.01563	1223.32	1.12259	1439.24	1.25232	6.75676			3.25				37	5155.7	250	636	44	190				10	472				0.4
[2485]	KAMCHATKA ARC	KAMCHATKA ARC / KAMCHATKA ARC / CENTRAL KAMCHATKA SEGMENT / KLYUCHEVSKOY	56.05	160.63	s_K-39 [2485]	BASALT [2485]	49.2072	-124.087	52.78	0.87	15			8.07	10	7.52	0.16	0.96	3.7	0.14		62.6493	2.22041	1207.51	1.00463	1335.36	1.07243	6.75676	1.17284	291					37	5215.65	250	242		57	95	66	14	14	359	17	81	1
[15897]	KAMCHATKA ARC	KAMCHATKA ARC / KAMCHATKA ARC / CENTRAL KAMCHATKA SEGMENT / KHARCHINSKY	56.65	161.4	s_5601G [15897]	BASALT [15897]	33.2484	-100.156	50.78	0.86	13.89	4.92	4.18	8.60702	8.86	11.03	0.17	1.09	2.87	0.19		69.7586	2.01563	1223.32	1.12259	1439.24	1.25232	6.75676			3.25				37	5155.7	250	636	44.1	190				10	472				0.4
[21026]	KAMCHATKA ARC	KAMCHATKA ARC / KAMCHATKA ARC / CENTRAL KAMCHATKA SEGMENT / KLYUCHEVSKOY	56.2064	160.825	s_12KY10-2 [21026]	ANDESITE, BASALTIC [21026]	46.7321	-113.085	52.58	0.892	14.908			8.19	9.877	7.564	0.166	0.947	2.79	0.176		62.4402	1.45774	1209.44	0.894637	1334.76	1.04971	6.75817		203.845	3.2744	1.75271			38.535	5347.54	260.426	214.722	32.96	58.835				16.302	350.265	20.53	70.348	1.546	0.377
[21026]	KAMCHATKA ARC	KAMCHATKA ARC / KAMCHATKA ARC / CENTRAL KAMCHATKA SEGMENT / KLYUCHEVSKOY	56.0181	160.809	s_11KY19 [21026]	BASALT [21026]	44.7769	-108.461	51.79	0.824	14.936			8.5	9.94	9.265	0.168	0.582	2.689	0.132		66.239	1.21723	1216.4	0.960471	1438.35	1.13678	6.76714		173.326	2.51894	1.72753			35.888	4939.88	242.859	375.192	38.606	106.859				12.338	290.788	19.385	63.841	1.223	0.284
[21026]	KAMCHATKA ARC	KAMCHATKA ARC / KAMCHATKA ARC / CENTRAL KAMCHATKA SEGMENT / KLYUCHEVSKOY	56.1531	160.791	s_12KY4-2 [21026]	BASALT [21026]	46.7321	-113.085	51.489	0.827	13.729			8.53	9.997	10.604	0.168	0.578	2.465	0.131		69.1135	1.09081	1216.29	0.940752	1508.13	1.24054	6.78527		163.211	2.47062	1.76665			36.026	4957.86	244.446	670.637	39.441	163.683				11.294	247.972	18.161	62.619	1.372	0.381
[19962]	KAMCHATKA ARC	KAMCHATKA ARC / KAMCHATKA ARC / CENTRAL KAMCHATKA SEGMENT / TOLBACHIK	55.711	160.273	s_K01-56 [19962]	TRACHYBASALT [19962]	48.5305	-129.182	51	0.93	13.8			8.96	11.3	9.68	0.17	0.78	2.37	0.2		66.04	1.24031	1234.99	1.08507	1606.02	1.26159	6.79319	1.32184	195.5					41.1	5575.35	279.2	401	43	109.3	103.5	73.8	14.1	15.7	275.4	19.9	78.3	1.2
[22592]	KAMCHATKA ARC	KAMCHATKA ARC / KAMCHATKA ARC / CENTRAL KAMCHATKA SEGMENT / KLYUCHEVSKOY	56.05	160.63	s_KL-09 [22592]	ANDESITE, BASALTIC [22592]	49.2072	-124.087	52.42	0.84	13.92			8.74	10.12	10.74	0.16	0.66	2.28	0.13		68.8658	0.91758	1217.07	0.915613	1501.97	1.23363	6.82857		165.414	2.39306	1.7052	7.57	0.41	35	5035.8	239	660		160			14	9.07	253	16.31	62.08	1.33	0.35
[21026]	KAMCHATKA ARC	KAMCHATKA ARC / KAMCHATKA ARC / CENTRAL KAMCHATKA SEGMENT / KLYUCHEVSKOY	56.2389	160.84	s_KY10-18 [21026]	ANDESITE, BASALTIC [21026]	46.7321	-113.085	52.524	0.877	14.516			8.04	10.008	7.851	0.163	0.918	2.774	0.169		63.7377	1.43121	1204.17	0.861968	1338.67	1.07494	6.82974							36.714	5257.61	250.747	297.824	34.382	68.859				17.794	343.751	18.746	71.472
[7640]	KAMCHATKA ARC	KAMCHATKA ARC / KAMCHATKA ARC / CENTRAL KAMCHATKA SEGMENT / KLYUCHEVSKOY	56.05	160.63	s_VPK5KO [7640]	BASALT, OLIVINE-CLINOPYROXENE [7640]	49.2072	-124.087	50.3	0.76	13.7	2.8	6.29	8.80944	10.74	11.78	0.14	0.87	2.3	0.21	0.12	70.6483	1.37656	1231.42	1.14876	1579.65	1.35281	6.84211		122.632					38	4556.2	260	846	48	202				9	239	19	63	1.9
[12740]	KAMCHATKA ARC	KAMCHATKA ARC / KAMCHATKA ARC / CENTRAL KAMCHATKA SEGMENT	58	157.5	s_0384-1 [12740]	ANDESITE, BASALTIC [12740]			52.64	1.01	14.25			7.54	8.57	6.8	0.13	1.36	2.91	0.17		61.8807	1.89138	1192.55	0.786348	1186.39	0.983153	6.85185		100	10.7692				27	6054.95	185	550	22	135				34	460	17	110	4.1
[21026]	KAMCHATKA ARC	KAMCHATKA ARC / KAMCHATKA ARC / CENTRAL KAMCHATKA SEGMENT / KLYUCHEVSKOY	56.2061	160.827	s_12KY9-1 [21026]	ANDESITE, BASALTIC [21026]	46.7321	-113.085	52.307	0.888	14.813			8.17	9.87	7.54	0.165	0.926	2.77	0.174		62.423	1.46776	1209.76	0.894815	1341.08	1.0526	6.86355		206.356	3.34486	1.80973			36.828	5323.56	252.771	223.236	33.175	57.624				16.269	347.621	19.409	70.226	1.517	0.414
[2485][2486]	KAMCHATKA ARC	KAMCHATKA ARC / KAMCHATKA ARC / CENTRAL KAMCHATKA SEGMENT / KLYUCHEVSKOY	56.05	160.63	s_K-21 [2485]	BASALT [2485]	49.2072	-124.087	52.27	0.86	14.27			8.34	10.14	8.88	0.17	0.93	2.5	0.15		65.7129	1.26914	1211.24	0.902422	1398.74	1.13864	6.86486	1.2875	278					37	5155.7	254	459		99	103	72	13	14	342	17	80	1
[21026]	KAMCHATKA ARC	KAMCHATKA ARC / KAMCHATKA ARC / CENTRAL KAMCHATKA SEGMENT / KLYUCHEVSKOY	56.14	160.797	s_13KY5 [21026]	BASALT [21026]	45.7624	-110.792	51.449	0.883	15.645			8.47	9.481	7.745	0.162	0.656	2.897	0.143		62.2061	1.49412	1220.92	0.992632	1382.85	1.03909	6.86722		408.191	2.60564	1.6875			35.006	5293.59	240.394	273.427	34.578	81.18				12.497	308.116	20.324	69.398	0.564	0.34
[2485]	KAMCHATKA ARC	KAMCHATKA ARC / KAMCHATKA ARC / CENTRAL KAMCHATKA SEGMENT / KLYUCHEVSKOY	56.05	160.63	s_K-32-81036 [2485]	BASALT [2485]	49.2072	-124.087	52.14	0.89	16.23			8.49	9.53	8.04	0.16	0.66	3.01	0.13		63.0259	1.47362	1217.08	1.00038	1356.09	1.0336	6.87179	1.23611	234					39	5335.55	268	289		85	89	90	14	10	307	19	72	1
[2485][2486]	KAMCHATKA ARC	KAMCHATKA ARC / KAMCHATKA ARC / CENTRAL KAMCHATKA SEGMENT / KLYUCHEVSKOY	56.05	160.63	s_K-596 [2485]	BASALT [2485]	49.2072	-124.087	52.67	0.93	14.94			8.57	9.67	8.36	0.17	0.92	2.78	0.09		63.7141	1.41572	1216.99	0.952771	1382.47	1.08733	6.88571	0.784091	294					35	5575.35	241	360		91	69	71	13	14	336	17	88	1
[4276]	KAMCHATKA ARC	KAMCHATKA ARC / KAMCHATKA ARC / CENTRAL KAMCHATKA SEGMENT / TOLBACHIK	55.82	160.37	s_TOL-6/6 [4276]	BASALT [4276]	48.3247	-127.348	51.4	1.15	14.51	3.64	6.09	9.36527	10.29	8.86	0.18	1.15	2.54	0.32	0.6	63.0025	1.62096	1246.98	1.19249	1543.5	1.18272	6.90244		101					41	6894.25	283	430	41	158		85	16	29	309	27	119	3
[22592]	KAMCHATKA ARC	KAMCHATKA ARC / KAMCHATKA ARC / CENTRAL KAMCHATKA SEGMENT / KLYUCHEVSKOY	56.05	160.63	s_KL-12 [22592]	ANDESITE, BASALTIC [22592]	49.2072	-124.087	52.35	0.83	13.72			8.87	10.09	10.91	0.16	0.65	2.29	0.13		68.8859	0.924449	1221.44	0.938608	1532.22	1.25226	6.91429		167.692	2.36571	1.71429	8.11	0.45	35	4975.85	242	644		162			14	8.96	249	16.25	60.86	1.3	0.32
[2485][2486]	KAMCHATKA ARC	KAMCHATKA ARC / KAMCHATKA ARC / CENTRAL KAMCHATKA SEGMENT / KLYUCHEVSKOY	56.05	160.63	s_K-12-7 [2485]	BASALT [2485]	49.2072	-124.087	51.15	0.8	13.4			8.58	10.13	11.79	0.17	0.56	2.36	0.11		71.21	1.04618	1219.02	0.983905	1554.71	1.31704	6.94595	1.37097	211					37	4796	257	850		192	85	74	15	9	239	18	62	1
[21026]	KAMCHATKA ARC	KAMCHATKA ARC / KAMCHATKA ARC / CENTRAL KAMCHATKA SEGMENT / KLYUCHEVSKOY	56.2431	160.845	s_KY10-17 [21026]	ANDESITE, BASALTIC [21026]	46.7321	-113.085	52.505	0.878	14.49			8.19	9.873	7.908	0.163	0.904	2.75	0.169		63.4773	1.4047	1208.33	0.876275	1355.85	1.07707	6.94929		208.039	3.27302	1.77037			35.775	5263.61	248.611	302.137	34.53	69.398				15.203	333.38	19.079	68.935	1.48	0.414
[21026]	KAMCHATKA ARC	KAMCHATKA ARC / KAMCHATKA ARC / CENTRAL KAMCHATKA SEGMENT / KLYUCHEVSKOY	56.1319	160.805	s_13KY3 [21026]	ANDESITE, BASALTIC [21026]	45.7624	-110.792	52.123	0.886	15.815			8.26	9.48	7.914	0.161	0.652	2.919	0.146		63.2974	1.39779	1210.81	0.93218	1337.49	1.02931	6.97207		157.007	2.74414	1.73561			33.975	5311.57	236.876	278.065	35.682	84.093				13.976	299.663	20.07	69.969	1.486	0.401
[23355]	KAMCHATKA ARC	KAMCHATKA ARC / KAMCHATKA ARC / CENTRAL KAMCHATKA SEGMENT / KHARCHINSKY	56.65	161.4	s_KH98-L4 [23355]	BASALT [23355]	33.2484	-100.156	50.15	0.89	13.97			9.65	9.92	11.55	0.18	1.03	2.63	0.21		68.2983	1.87351	1257.34	1.37322	1641.56	1.34393	7.02941	1.5082	192.254	3.67742	1.85161			34	5335.55	239	752		170	92	78	16	13.5	380	16.4	61	1.42
[19962]	KAMCHATKA ARC	KAMCHATKA ARC / KAMCHATKA ARC / CENTRAL KAMCHATKA SEGMENT / TOLBACHIK	55.7611	160.316	s_K01-46B [19962]	BASALT [19962]	49.5799	-134.061	49.4	1.02	13.4			9.5	11.4	10.7	0.18	0.76	2.33	0.2		66.968	1.49189	1259.46	1.31993	1763.9	1.3698	7.04578	1.45391	195					41.5	6114.9	292.4	507.2	48	139.1	104.1	79.6	13.7	14.1	252	20.8	71.6	1
[21026]	KAMCHATKA ARC	KAMCHATKA ARC / KAMCHATKA ARC / CENTRAL KAMCHATKA SEGMENT / KLYUCHEVSKOY	56.3147	160.806	s_13KY101-1 [21026]	ANDESITE, BASALTIC [21026]	47.7195	-115.555	52.205	0.948	15.399			8.59	9.477	8.247	0.164	0.649	2.828	0.16		63.3448	1.31337	1219.87	0.962978	1399.84	1.06272	7.05829							35.082	5683.26	247.619	331.571	37.073	89.231				14.857	272.72	19.87	75.771
[4276][3509]	KAMCHATKA ARC	KAMCHATKA ARC / KAMCHATKA ARC / CENTRAL KAMCHATKA SEGMENT / KLYUCHEVSKOY	56.05	160.63	s_KLU-11 [4276]	BASALT [4276] / ANDESITE, BASALTIC [3509]	49.2072	-124.087	52.6	0.97	15.82	2.31	6.79	8.85	9.79	8.23	0.17	0.63	2.97	0.16	0.4	62.6014	1.35	1226.1	1.02716	1428.81	1.06671	7.08108	0.858824	162.857	2.73469	1.95918	7.9	0.54	37	5815.15	262	321	36	109	73	81	18	9	287	19	85	1.4	0.32
[2481]	KAMCHATKA ARC	KAMCHATKA ARC / KAMCHATKA ARC / CENTRAL KAMCHATKA SEGMENT / TOLBACHIK	55.53	160.27	s_9-7-75 [2481]	BASALT [2481]	46.5176	-118.504	49.7	0.92	13.2			9.18	12.1	9.65	0.19	0.75	2.37	0.18	0.62	65.4237	1.4529	1250.9	1.21959	1742.11	1.33714	7.08229		93.9286	3.61111	1.88889			40.1	5515.4	284	315		98					296	17.8	65.4	2.8
[2475][2195]	KAMCHATKA ARC	KAMCHATKA ARC / KAMCHATKA ARC / CENTRAL KAMCHATKA SEGMENT / TOLBACHIK	55.53	160.27	s_TB-9-7-75 [2475]	BASALT [2475]	46.5176	-118.504	49.7	0.92	13.2			9.18	12.1	9.65	0.19	0.75	2.37	0.18	0.62	65.4237	1.4529	1250.9	1.21959	1742.11	1.33714	7.08229		93.9286	3.7	1.8			40.1	5515.4	284	587	39.9	98		122			296	17.8	65.4	2.8	0.46
[4276][3509]	KAMCHATKA ARC	KAMCHATKA ARC / KAMCHATKA ARC / CENTRAL KAMCHATKA SEGMENT / KLYUCHEVSKOY	56.05	160.63	s_KLU-04 [4276]	BASALT [4276] / ANDESITE, BASALTIC [3509]	49.2072	-124.087	52.2	1.07	15.99	2.81	6.34	8.92	9.39	7.7	0.17	0.71	3.13	0.19	0.51	60.8428	1.60278	1231.92	1.08133	1420.21	1.0371	7.08571	0.79	131.176	2.91429	1.55714	7.8	0.58	35	6414.65	248	283	39	99	79	84	15	10	293	19	100	1.7	0.36
[2485]	KAMCHATKA ARC	KAMCHATKA ARC / KAMCHATKA ARC / CENTRAL KAMCHATKA SEGMENT / KLYUCHEVSKOY	56.05	160.63	s_K-13 [2485]	BASALT [2485]	49.2072	-124.087	52.26	0.85	14.2			7.96	9.24	8.98	0.16	0.87	2.56	0.13		67.0038	1.27051	1198.93	0.814094	1322.87	1.10398	7.08571	0.975	132.5					35	5095.75	248	552		141	78	70	15	14	314	17	80	2
[4788]	KAMCHATKA ARC	KAMCHATKA ARC / KAMCHATKA ARC / CENTRAL KAMCHATKA SEGMENT / BAKENING	53.93	158.07	s_120 [4788]	BASALT [4788]	46.8831	-150.955	51	1.61	16.05	2.94	6.03	8.67541	8.15	9.03	0.15	1.09	3.72	0.45	0.25	65.2001	2.89201	1226.38	1.25371	1365.07	1.08985	7.09091							22	9651.95	156	362	40	257		80	18	16	550	30	214
[4276]	KAMCHATKA ARC	KAMCHATKA ARC / KAMCHATKA ARC / CENTRAL KAMCHATKA SEGMENT / TOLBACHIK	55.82	160.37	s_655 [4276]	BASALT [4276]	48.3247	-127.348	50.46	0.95	13.42	2.14	7.16	9.08557	11.6	9.67	0.17	0.85	2.37	0.21	0.63	65.7039	1.38987	1243.31	1.15584	1663.06	1.29918	7.10526		152.667	3.42328	1.85185	7.2	0.59	38	5695.25	270	418	40	99		75	16	18	292	19	79	1.5	0.46
[21026]	KAMCHATKA ARC	KAMCHATKA ARC / KAMCHATKA ARC / CENTRAL KAMCHATKA SEGMENT / KLYUCHEVSKOY	56.2119	160.818	s_12KY13-2 [21026]	ANDESITE, BASALTIC [21026]	46.7321	-113.085	52.395	0.871	14.111			8.22	9.4	9.228	0.165	0.857	2.706	0.162		66.8954	1.35125	1205.58	0.873	1371.07	1.13435	7.10657		207.069	3.10011	1.77987			34.766	5221.64	247.067	530.864	37.226	136.486				14.839	309.469	20.51	69.397	1.448	0.405
[4276]	KAMCHATKA ARC	KAMCHATKA ARC / KAMCHATKA ARC / CENTRAL KAMCHATKA SEGMENT / KIZIMEN	55.17	160.53	s_TAM-01 [4276]	BASALT [4276]	39.5434	-92.4672	51.4	0.83	15.76	9.37	0.43	8.86113	9.23	8.43	0.19	0.73	2.72	0.23	0.66	63.1326	1.41696	1229.99	1.05193	1411.65	1.06608	7.12903		149.167	3.71707	1.64878	7.9	0.51	31	4975.85	221	481	36	166		79	15	15	380	16	86	2.4	0.5
[21026]	KAMCHATKA ARC	KAMCHATKA ARC / KAMCHATKA ARC / CENTRAL KAMCHATKA SEGMENT / KLYUCHEVSKOY	56.3147	160.806	s_13KY101-4 [21026]	ANDESITE, BASALTIC [21026]	47.7195	-115.555	52.332	0.954	15.413			8.53	9.551	8.075	0.165	0.592	2.796	0.164		63.0176	1.23002	1217.71	0.932469	1395.42	1.05156	7.1296							34.715	5719.23	247.504	328.136	35.745	83.694				13.411	286.032	21.193	76.397
[4276][20793][7063]	KAMCHATKA ARC	KAMCHATKA ARC / KAMCHATKA ARC / EASTERN KAMCHATKA SEGMENT / SHMIDT	54.8667	160.776	s_SHM-01 [4276] / s_SHM-01 (198) [20793]	BASALT [4276]	31.745	-68.5879	50.6	0.89	16.17	3.75	5.94	9.31425	10.39	8.07	0.18	0.57	2.34	0.12	0.45	60.9306	1.11422	1248.92	1.15501	1532.32	1.08317	7.13889	1.6608	142.105	1.93684	1.5	9.6	0.41	36	5335.55	257	335	43	103	113.2	78	15	15	215	21	68.16	1.33	0.67
[4276][3509]	KAMCHATKA ARC	KAMCHATKA ARC / KAMCHATKA ARC / CENTRAL KAMCHATKA SEGMENT / KLYUCHEVSKOY	56.05	160.63	s_KLU-09 [4276]	BASALT [4276] / ANDESITE, BASALTIC [3509]	49.2072	-124.087	52.7	0.96	15.55	3.01	6.01	8.73	9.71	8.31	0.17	0.66	2.98	0.17	0.54	63.1459	1.36594	1222.07	0.996728	1415.31	1.07238	7.14286	0.896552	173.571	3.01087	1.8587	8.3	0.5	35	5755.2	250	343	38	104	78	78	17	10	290	18	87	1.4	0.33
[2475]	KAMCHATKA ARC	KAMCHATKA ARC / KAMCHATKA ARC / CENTRAL KAMCHATKA SEGMENT	54	158	s_8822 [2475]	BASALT [2475]	49.6393	-164.125	51.6	0.66	15.6			8.92	11.5	7.96	0.17	0.68	2.05	0.12	0.16	61.6311	0.866616	1234.12	1.00345	1499.26	1.10402	7.18519		115.714	3.78571	1.78571			40.5	3956.7	291	295		36					742	11.8	33	2.1
[21026]	KAMCHATKA ARC	KAMCHATKA ARC / KAMCHATKA ARC / CENTRAL KAMCHATKA SEGMENT / KLYUCHEVSKOY	56.2064	160.825	s_12KY10-1 [21026]	ANDESITE, BASALTIC [21026]	46.7321	-113.085	52.534	0.899	14.876			8.17	9.908	7.528	0.166	0.949	2.756	0.173		62.3856	1.4398	1208.85	0.88744	1333.81	1.04903	7.19069							35.545	5389.51	255.593	216.581	33.033	56.862				16.135	346.515	18.323	70.851
[22589]	KAMCHATKA ARC	KAMCHATKA ARC / KAMCHATKA ARC / CENTRAL KAMCHATKA SEGMENT / KAMEN	55.9974	160.5	s_KAM-08-68 [22589]	ANDESITE, BASALTIC [22589]	49.3834	-128.103	52.99	0.91	15.16			8.68	9.66	8.7	0.17	0.76	2.81	0.16		64.3385	1.27577	1217.67	0.94981	1401.31	1.09258	7.2	1.08537	167.081	3.20513	1.78974	10.14	0.43	35	5455.45	252	400	39	107	89	79	17	12.84	278	18.18	82	1.61	0.43
[21026]	KAMCHATKA ARC	KAMCHATKA ARC / KAMCHATKA ARC / CENTRAL KAMCHATKA SEGMENT / KLYUCHEVSKOY	56.21	160.82	s_12KY14-1 [21026]	ANDESITE, BASALTIC [21026]	46.7321	-113.085	52.803	0.885	14.46			8.3	9.425	9.094	0.166	0.868	2.747	0.163		66.3548	1.33308	1206.75	0.882821	1361.78	1.11662	7.20628							33.901	5305.57	244.3	506.836	36.485	129.699				15.778	314.171	20.775	71.787
[4276][20793][7063][24876]	KAMCHATKA ARC	KAMCHATKA ARC / KAMCHATKA ARC / EASTERN KAMCHATKA SEGMENT / KOMAROV	55.0052	160.759	s_KOM-06 [4276] / s_KOM-06 (202) [20793] / s_KOM-96-06 [24876]	BASALT [4276] / NOT GIVEN [24876]	32.7867	-72.2387	51.7	0.83	16.32	2.03	7.47	9.29659	9.68	8.2	0.18	0.68	2.41	0.11	0.56	61.3553	1.09748	1241.92	1.0865	1457.96	1.0517	7.21622	0.827288	194.828	2.31765	1.63529	5.2	0.32	37	4975.85	267	368	41	119	53.6	81	16	13	240	18	64.79	1.16	0.59
[20395]	KAMCHATKA ARC	KAMCHATKA ARC / KAMCHATKA ARC / SOUTHERN KAMCHATKA SEGMENT / GORELY	52.45	158.12	s_OG-167 [20395]	BASALT [20395]	29.7337	-83.535	49.3861	0.966041	15.6453			9.51	9.07911	10.9435	0.172704	0.789109	2.61637	0.283273	-0.54	67.4408	1.81604	1254.71	1.36793	1556.04	1.22573	7.23105	1.1808	112.704	4.03779	1.85435			27.492	5791.42	198.796	442.438		169.6	99.9	68.4	13.5475	10.5904	396.194	20.3309	84.6038	2.72635	0.572904
[22592]	KAMCHATKA ARC	KAMCHATKA ARC / KAMCHATKA ARC / CENTRAL KAMCHATKA SEGMENT / KLYUCHEVSKOY	56.05	160.63	s_KL-19 [22592]	ANDESITE, BASALTIC [22592]	49.2072	-124.087	52.82	0.97	15.34			8.93	9.73	8.43	0.16	0.72	2.74	0.16		62.9522	1.2191	1226.54	0.98913	1438.05	1.083	7.23529		143.452	2.57143	1.73545	8.72	0.5	34	5815.15	246	322		87			16	9.42	286	17.67	74.44	1.68	0.34
[21026]	KAMCHATKA ARC	KAMCHATKA ARC / KAMCHATKA ARC / CENTRAL KAMCHATKA SEGMENT / KLYUCHEVSKOY	56.2061	160.827	s_12KY9-3 [21026]	ANDESITE, BASALTIC [21026]	46.7321	-113.085	52.939	0.902	15.103			8.27	9.917	7.502	0.167	0.955	2.856	0.177		62.0182	1.46129	1210.81	0.906782	1334.3	1.0429	7.25937							35.594	5407.49	258.39	208.362	34.149	54.337				16.094	344.216	20.771	70.407
[4276][3509]	KAMCHATKA ARC	KAMCHATKA ARC / KAMCHATKA ARC / CENTRAL KAMCHATKA SEGMENT / KLYUCHEVSKOY	56.05	160.63	s_KLU-10 [4276]	BASALT [4276] / ANDESITE, BASALTIC [3509]	49.2072	-124.087	52.6	0.97	15.72	2.31	6.63	8.73	9.72	8.2	0.17	0.65	2.87	0.17	0.45	62.8352	1.29067	1222.48	0.989235	1409.45	1.06002	7.28571	0.870588	149.333	2.68687	1.72727	7.5	0.49	35	5815.15	255	318	39	108	74	81	19	9	290	18	85	1.5	0.31
[22526]	KAMCHATKA ARC	KAMCHATKA ARC / KAMCHATKA ARC / CENTRAL KAMCHATKA SEGMENT / AVACHA (AVACHINSKY)	53.2891	158.787	s_AVA-17-06 [22526]	BASALT [22526]	33.5004	-87.138	49.48	0.946	14.91			9.89	10.52	10.96	0.193	0.66	2.44	0.171		66.6081	1.48302	1268.22	1.42619	1715.42	1.30509	7.30769	1.34328	87.6667	6.25				39	5671.27	285	584	49	184	90	76	16	10	411	21.9	67	3
[4788][24876]	KAMCHATKA ARC	KAMCHATKA ARC / KAMCHATKA ARC / CENTRAL KAMCHATKA SEGMENT / BAKENING	53.93	158.07	s_BAK14 [4788] / s_BAK-95-14 [24876]	BASALT [4788] / NOT GIVEN [24876]	46.8831	-150.955	50.32	0.99	16.41	2.18	7.02	8.98156	9.74	8.92	0.18	0.68	3	0.23	0.49	64.1276	1.85005	1238.43	1.24132	1465.71	1.11063	7.33333	0.625	61.6667	3.47639	1.71674	6.2	0.71	33	5935.05	242	411	41	126	60	77	17	17	453	24	96	3	0.45
[4788][24876]	KAMCHATKA ARC	KAMCHATKA ARC / KAMCHATKA ARC / CENTRAL KAMCHATKA SEGMENT / BAKENING	53.93	158.07	s_BAK15 [4788] / s_BAK-95-15 [24876]	BASALT [4788] / NOT GIVEN [24876]	46.8831	-150.955	50.13	0.96	16.8	2.6	6.73	9.06948	9.51	8.33	0.19	0.77	3	0.26	0.51	62.3102	1.99339	1243.79	1.27456	1442.12	1.06944	7.34375	0.572917	84.3478	3.99103	1.79372	7.1	0.82	32	5755.2	235	317	40	121	55	80	17	21	531	24	96	2.3	0.59
[21026]	KAMCHATKA ARC	KAMCHATKA ARC / KAMCHATKA ARC / CENTRAL KAMCHATKA SEGMENT / KLYUCHEVSKOY	56.1178	160.812	s_13KY2 [21026]	BASALT [21026]	45.7624	-110.792	51.633	0.953	14.859			8.84	9.607	8.983	0.167	0.62	2.753	0.156		64.6533	1.31787	1227.52	1.02121	1477.99	1.12929	7.34714		119.736	2.47967	1.78506			35.202	5713.23	258.634	421.27	38.801	113.146				11.127	271.085	19.449	72.769	1.731	0.227
[19962]	KAMCHATKA ARC	KAMCHATKA ARC / KAMCHATKA ARC / CENTRAL KAMCHATKA SEGMENT / TOLBACHIK	55.7611	160.316	s_K01-46A [19962]	BASALT [19962]	49.5799	-134.061	49.6	1.03	13.5			9.5	11.4	10.6	0.18	0.77	2.37	0.2		66.76	1.49388	1258.37	1.31334	1752.39	1.35929	7.35859	1.48818	224.778					39.6	6174.85	291.4	473.7	48	127.1	107	78.5	13.6	14.4	249.1	21	71.9	0.9
[21026]	KAMCHATKA ARC	KAMCHATKA ARC / KAMCHATKA ARC / CENTRAL KAMCHATKA SEGMENT / KLYUCHEVSKOY	56.125	161.769	s_13KY103-3 [21026]	BASALT [21026]	22.9893	-74.1554	51.463	0.88	15.178			8.73	9.387	8.139	0.162	0.687	2.812	0.149		62.6607	1.44665	1227.99	1.01639	1430.78	1.07376	7.37324							32.968	5275.6	243.081	332.585	37.033	103.246				13.42	294.371	20.242	69.557
[7640]	KAMCHATKA ARC	KAMCHATKA ARC / KAMCHATKA ARC / CENTRAL KAMCHATKA SEGMENT / TOLBACHIK	55.82	160.37	s_6024KO [7640]	BASALT, OLIVINE-CLINOPYROXENE [7640]	48.3247	-127.348	51.45	0.95	13.65	2.46	6.76	8.97351	11.68	9.7	0.17	0.88	2.4	0.21	0.3	66.0525	1.27318	1233.8	1.08587	1610.12	1.27869	7.375		88.5714	3.17708				40	5695.25	295	376	39	92				17	284	20	77	2.8
[19962]	KAMCHATKA ARC	KAMCHATKA ARC / KAMCHATKA ARC / CENTRAL KAMCHATKA SEGMENT / TOLBACHIK	55.6857	160.239	s_K01-35 [19962]	BASALT [19962]	49.8102	-135.807	50.6	1.03	13.9			9.08	10.7	9.88	0.17	1.01	2.62	0.26		66.2001	1.7338	1241.14	1.20451	1585.26	1.26947	7.37569	1.43825	149.118					36.2	6174.85	267	420.1	43	129.9	131.6	75.6	14	20.5	269.5	20.6	91.5	1.7
[21026]	KAMCHATKA ARC	KAMCHATKA ARC / KAMCHATKA ARC / CENTRAL KAMCHATKA SEGMENT / KLYUCHEVSKOY	55.9911	160.836	s_13KY107-1 [21026]	BASALT [21026]	44.7769	-108.461	51.513	0.947	15.262			8.47	9.434	7.92	0.161	0.667	2.888	0.16		62.7299	1.48456	1220.53	0.980733	1397.78	1.05688	7.38521		227.547	2.77436	1.71339			34.093	5677.26	251.784	332.887	36.732	91.796				12.373	296.933	20.673	75.045	1.073	0.377
[21026]	KAMCHATKA ARC	KAMCHATKA ARC / KAMCHATKA ARC / CENTRAL KAMCHATKA SEGMENT / KLYUCHEVSKOY	56.05	160.63	s_11KY-104-3 [21026]	ANDESITE, BASALTIC [21026]	49.2072	-124.087	51.869	0.953	15.364			8.44	9.393	7.868	0.162	0.658	2.894	0.165		62.6588	1.42256	1218.16	0.956834	1382.29	1.04513	7.39422		136.082	2.62518	1.73987			32.875	5713.23	243.085	305.357	34.92	76.902				12.244	283.66	20.706	75.019	1.667	0.392
[21026]	KAMCHATKA ARC	KAMCHATKA ARC / KAMCHATKA ARC / CENTRAL KAMCHATKA SEGMENT / KLYUCHEVSKOY	56.3147	160.806	s_13KY101-2 [21026]	ANDESITE, BASALTIC [21026]	47.7195	-115.555	51.982	0.956	15.363			8.7	9.398	8.132	0.165	0.661	2.802	0.161		62.7211	1.33516	1224.19	0.983751	1414.51	1.06078	7.40169		130.638	2.6665	1.7533			33.869	5731.22	250.688	323.534	37.141	89.385				12.919	285.612	19.443	75.975	1.798	0.263
[21026]	KAMCHATKA ARC	KAMCHATKA ARC / KAMCHATKA ARC / CENTRAL KAMCHATKA SEGMENT / KLYUCHEVSKOY	56.1081	160.824	s_11KY101 [21026]	BASALT [21026]	45.7624	-110.792	51.793	0.926	15.579			8.4	9.954	8.222	0.163	0.637	2.826	0.154		63.7925	1.36385	1215.9	0.973565	1393.37	1.0714	7.47151		120.426	2.74961	1.76903			33.452	5551.37	249.937	324.424	36.604	89.011				12.03	291.704	20.539	74.824	1.734	0.239
[19962]	KAMCHATKA ARC	KAMCHATKA ARC / KAMCHATKA ARC / CENTRAL KAMCHATKA SEGMENT / TOLBACHIK	55.711	160.273	s_K01-57 [19962]	TRACHYBASALT [19962]	48.5305	-129.182	51.2	1.15	14.5			9.21	10	8.8	0.17	1.17	2.58	0.33		63.2335	1.71494	1242.76	1.17052	1511.84	1.16988	7.48052	0.981132	124.6					38.5	6894.25	288	460.2	42	126.5	119.6	83.4	16.7	27.9	290	25.2	121.9	2.5
[21026]	KAMCHATKA ARC	KAMCHATKA ARC / KAMCHATKA ARC / CENTRAL KAMCHATKA SEGMENT / KLYUCHEVSKOY	56.3147	160.806	s_13KY101-3 [21026]	ANDESITE, BASALTIC [21026]	47.7195	-115.555	52.244	0.944	15.332			8.56	9.529	8.147	0.163	0.644	2.844	0.159		63.1425	1.31611	1218.82	0.952829	1398.78	1.06103	7.49675							33.349	5659.28	250.009	335.348	37.203	87.912				12.499	287.335	21.187	75.19
[21026]	KAMCHATKA ARC	KAMCHATKA ARC / KAMCHATKA ARC / CENTRAL KAMCHATKA SEGMENT / KLYUCHEVSKOY	56.1178	160.812	s_13KY1 [21026]	BASALT [21026]	45.7624	-110.792	51.349	0.942	14.814			8.94	9.411	9.302	0.168	0.583	2.718	0.152		65.1918	1.30514	1230.76	1.04325	1497.07	1.1433	7.54391		123.601	2.49662	1.77743			33.441	5647.29	252.276	446.704	40.634	127.955				10.771	270.795	20.914	71.982	1.668	0.218
[12904]	KAMCHATKA ARC	KAMCHATKA ARC / KAMCHATKA ARC / CENTRAL KAMCHATKA SEGMENT / KLYUCHEVSKOY	56.0853	160.481	s_KLV 5/6 [12904]	ANDESITE, BASALTIC [12904]	50.6317	-131.274	52.76	0.88	16.55			8.2	9.3	7.67	0.16	0.68	3.04	0.16		62.7374	1.41787	1206.77	0.923216	1283.48	0.986824	7.5443	1.02035	149.688					31.6	5275.6	238.4	242.4		78.2	75.2	75.1	16.4	10.3	315.6	18.1	73.7	1.6
[23355]	KAMCHATKA ARC	KAMCHATKA ARC / KAMCHATKA ARC / CENTRAL KAMCHATKA SEGMENT / KHARCHINSKY	56.65	161.4	s_1006 [23355]	BASALT [23355]	33.2484	-100.156	51.34	0.86	13.79			9.4	10.05	10.17	0.19	1.35	2.45	0.23		66.0723	1.73141	1245.77	1.20864	1541.05	1.264	7.55556	1.27119	304.545	3.27273	1.86061			36	5155.7	272	598		101	75	82	16	19.9	337	17.7	59	1.1
[21026]	KAMCHATKA ARC	KAMCHATKA ARC / KAMCHATKA ARC / CENTRAL KAMCHATKA SEGMENT / KLYUCHEVSKOY	55.9897	160.814	s_13KY105-2 [21026]	BASALT [21026]	44.7769	-108.461	51.688	0.996	15.448			8.56	9.342	7.37	0.164	0.757	2.966	0.179		60.7807	1.59539	1224.04	1.00118	1385.59	1.02757	7.59015		134.274	2.80686	1.73026			34.671	5971.02	263.158	258.274	35.028	69.07				14.443	315.43	21.789	79.947	1.787	0.293
[4276]	KAMCHATKA ARC	KAMCHATKA ARC / KAMCHATKA BACK ARC / SREDINNY RIDGE / ICHINSKY(ICHINSKII)	55.72	157.75	s_6250 [4276]	BASALT [4276]			51.99	0.85	14.7	3.01	5.62	8.3284	10.07	8.41	0.16	1.46	2.66	0.23	0.63	64.5093	1.88814	1214.59	1.01645	1329.65	1.12029	7.59375		119.73	5.40719	1.85629	6.6	0.81	32	5095.75	243	346	39	92		73	16	25	503	18	95	3.7	0.38
[23355]	KAMCHATKA ARC	KAMCHATKA ARC / KAMCHATKA ARC / CENTRAL KAMCHATKA SEGMENT / KHARCHINSKY	56.65	161.4	s_KH98-9 [23355]	BASALT [23355]	33.2484	-100.156	50.87	0.87	14.15			8.85	9.67	11.95	0.16	1	2.85	0.19		70.8498	1.88342	1229.68	1.2168	1508.88	1.31964	7.625	1.41538	191.25	4.22535	1.91549			32	5215.65	244	826		224	92	71	15	11.7	472	15.5	65	1.6
[2485]	KAMCHATKA ARC	KAMCHATKA ARC / KAMCHATKA ARC / CENTRAL KAMCHATKA SEGMENT / KLYUCHEVSKOY	56.05	160.63	s_K-17 [2485]	BASALT [2485]	49.2072	-124.087	52.11	0.9	14.92			8.43	10.28	7.78	0.17	0.98	2.63	0.17		62.4231	1.43053	1218.1	0.958584	1386.26	1.08104	7.63636	1.15476	305					33	5395.5	252	194		59	97	73	13	16	371	17	84	1
[4276]	KAMCHATKA ARC	KAMCHATKA ARC / KAMCHATKA ARC / CENTRAL KAMCHATKA SEGMENT / TOLBACHIK	55.82	160.37	s_TOL-6/3 [4276]	BASALT [4276]	48.3247	-127.348	50.9	1.22	14.57	3.59	6.31	9.54028	10.19	9.1	0.18	1.29	2.73	0.35	0.36	63.1938	2.04562	1254.87	1.31818	1563.53	1.20996	7.66667		64.4					36	7313.9	276	438	41	177		89	16	31	308	28	130	5
[21026]	KAMCHATKA ARC	KAMCHATKA ARC / KAMCHATKA ARC / CENTRAL KAMCHATKA SEGMENT / KLYUCHEVSKOY	56.125	161.769	s_13KY103-1 [21026]	ANDESITE, BASALTIC [21026]	22.9893	-74.1554	51.899	0.915	15.715			8.43	9.209	7.583	0.16	0.752	2.789	0.156		61.8196	1.409	1218.01	0.948561	1343.83	1.013	7.67475							32.766	5485.43	251.471	272.293	36.124	93.038				13.837	301.647	19.415	73.307
[14355]	KAMCHATKA ARC	KAMCHATKA ARC / KAMCHATKA BACK ARC / SREDINNY RIDGE / OZERNOVSKY LAVA FIELD	57.5348	160.652	s_SR 04 26 [14355]	BASALT [14355]			49.1	0.705	16.3			10.05	10.61	9.99	0.18	0.43	2.13	0.12		64.1481	1.07436	1274.7	1.41211	1691.3	1.20638	7.67568	1.88889	296.25	2.68345	1.73381	5.1		37	4226.47	284	218	51	109	85	74	12	7	452	14	45	0.8	0.25
[4788][24876]	KAMCHATKA ARC	KAMCHATKA ARC / KAMCHATKA ARC / CENTRAL KAMCHATKA SEGMENT / BAKENING	53.93	158.07	s_BAK24 [4788] / s_BAK-95-24 [24876]	BASALT [4788] / NOT GIVEN [24876]	46.8831	-150.955	49.68	1.03	16.22	2.46	6.91	9.12351	9.67	9.83	0.17	0.7	2.87	0.21	0.6	65.9793	1.90792	1243.82	1.31257	1505.95	1.16558	7.67647	0.768293	86.0714	4.1989	1.8232	6	0.6	34	6174.85	261	494	46	169	63	77	17	15	423	21	82	2.8	0.49
[24736]	KAMCHATKA ARC	KAMCHATKA ARC / KAMCHATKA ARC / CENTRAL KAMCHATKA SEGMENT / AVACHA (AVACHINSKY)	53.2358	158.678	s_AVX-16-02 [24736]	NOT GIVEN [24736]	32.9919	-86.8558	49.41	1.18	15.97			9.15	10.03	9.65	0.18	0.86	3.06	0.24		65.4977	2.39725	1248.24	1.40217	1531.11	1.19279	7.68496	0.502177	84.6201	3.81911	1.7673	6.07911		36.4753	7074.1	280.311	408.999	41.7434	147.682	47.5547	61.0448	14.9	14.413	446.672	24.1663	94.697	3.86584	0.661017
[22592]	KAMCHATKA ARC	KAMCHATKA ARC / KAMCHATKA ARC / CENTRAL KAMCHATKA SEGMENT / KLYUCHEVSKOY	56.05	160.63	s_KL-15 [22592]	ANDESITE, BASALTIC [22592]	49.2072	-124.087	52.85	0.92	15.73			8.98	9.48	8.26	0.16	0.73	2.76	0.14		62.3449	1.23656	1227.94	0.998929	1415	1.05654	7.69697		63.5897					33	5515.4	254	260		83			16	12	299	19	76	3.9
[23355]	KAMCHATKA ARC	KAMCHATKA ARC / KAMCHATKA ARC / CENTRAL KAMCHATKA SEGMENT / KHARCHINSKY	56.65	161.4	s_KHAR03-01 [23355]	BASALT [23355]	33.2484	-100.156	51.79	0.9	15.36			8.9	10.01	9.16	0.18	1	2.98	0.21	1.24	64.9441	1.80209	1229.72	1.14892	1441.07	1.1507	7.72727	1.28986	269.828	3.6875	1.85625			33	5395.5	255	442		116	89	78	18	13.8	450	17.3	69	1.16
[20395]	KAMCHATKA ARC	KAMCHATKA ARC / KAMCHATKA ARC / SOUTHERN KAMCHATKA SEGMENT / GORELY	52.45	158.12	s_OG-702 [20395]	BASALT [20395]	29.7337	-83.535	48.97	0.99	15.45			9.48	8.697	10.74	0.164	0.834	2.68	0.2409	0.15	67.097	2.06837	1255.81	1.37681	1548.38	1.21714	7.75451	1.09326	100.009	3.92734	1.74442	7.26942	0.843796	30.9754	5935.05	240.199	447.029	48.7504	188.812	97.0118	79.6464	15.535	13.4531	419.395	18.7406	88.7367	2.85491	0.426972
[21026]	KAMCHATKA ARC	KAMCHATKA ARC / KAMCHATKA ARC / CENTRAL KAMCHATKA SEGMENT / KLYUCHEVSKOY	55.9911	160.836	s_13KY110 [21026]	ANDESITE, BASALTIC [21026]	44.7769	-108.461	52.63	0.996	15.834			8.52	9.365	7.482	0.164	0.749	3.028	0.177		61.2509	1.48138	1218.21	0.966027	1351.9	1.01279	7.75832		220.081	2.764	1.73901			33.863	5971.02	262.72	256.743	35.426	68.497				13.613	319.754	21.84	80.475	1.116	0.369
[14355]	KAMCHATKA ARC	KAMCHATKA ARC / KAMCHATKA BACK ARC / SREDINNY RIDGE / OZERNOVSKY LAVA FIELD	57.5348	160.652	s_SR 04 28 [14355]	BASALT [14355]			49	0.728	15.9			9.3	11.1	8.31	0.18	0.49	2.18	0.19		61.6621	1.18815	1256.8	1.24173	1610.22	1.13964	7.77778	2.18367	500	2.59146	1.7561	5.5		36	4364.36	280	264	44	82	107	80	14	8	404	17	49	0.6	0.27
[21026]	KAMCHATKA ARC	KAMCHATKA ARC / KAMCHATKA ARC / CENTRAL KAMCHATKA SEGMENT / KLYUCHEVSKOY	55.9975	160.839	s_11KY21 [21026]	ANDESITE, BASALTIC [21026]	44.7769	-108.461	52.758	0.902	16.53			8.2	9.352	7.304	0.159	0.702	3.114	0.163		61.5875	1.4923	1208.76	0.933802	1285.19	0.975471	7.80472		129.233	2.91514	1.75385			31.171	5407.49	243.281	226.525	33.255	75.019				12.568	324.998	20.09	76.671	1.841	0.47
[21026]	KAMCHATKA ARC	KAMCHATKA ARC / KAMCHATKA ARC / CENTRAL KAMCHATKA SEGMENT / KLYUCHEVSKOY	56.05	160.63	s_11KY104-2 [21026]	ANDESITE, BASALTIC [21026]	49.2072	-124.087	52.435	0.959	15.596			8.55	9.501	7.971	0.164	0.658	2.929	0.167		62.6602	1.36371	1218.5	0.961398	1382.99	1.0446	7.80679		206.232	2.58112	1.68437			32.084	5749.2	250.473	304.985	35.495	80.479				12.951	293.651	20.342	77.083	1.161	0.347
[21026]	KAMCHATKA ARC	KAMCHATKA ARC / KAMCHATKA ARC / CENTRAL KAMCHATKA SEGMENT / KLYUCHEVSKOY	56.1156	160.748	s_KY10-13 [21026]	ANDESITE, BASALTIC [21026]	47.636	-117.247	52.037	0.899	15.88			8.38	9.395	7.722	0.161	0.65	2.897	0.144		62.3871	1.39219	1215.66	0.950248	1349.09	1.01915	7.80866		161.344	2.61543	1.73217			31.781	5389.51	248.167	251.051	37.06	82.073				12.114	306.836	18.972	68.598	1.411	0.305
[22560]	KAMCHATKA ARC	KAMCHATKA ARC / KAMCHATKA ARC / CENTRAL KAMCHATKA SEGMENT / KARYMSKY	53.7	158.1	s_S-567 [22560]	BASALT [22560]	44.2015	-137.989	47.17	0.75	16.17	4.3	7.72	11.5891	10.54	10.3	0.2	0.26	1.92	0.08	0.43	61.5351	1.13966	1335.11	1.88455	1993.73	1.2852	7.82353	3.73077	145.714	2.06306	1.7027			34	4496.25	266	113	57	89	97	86	15.6	3	307	11	26	0.7	0.18
[15280]	KAMCHATKA ARC	KAMCHATKA ARC / KAMCHATKA ARC / CENTRAL KAMCHATKA SEGMENT / KARYMSKY	54.07	159.6	s_C567 [15280]	BASALT [15280]	36.5692	-86.8428	47.17	0.75	16.17	4.3	7.72	11.5891	10.54	10.3	0.2	0.26	1.92	0.08	0.43	61.5351	1.13966	1335.11	1.88455	1993.73	1.2852	7.82353	3.73077	145.714	2.06306	1.7027			34	4496.25	266	113	57	89	97	86	15.6	3	307	11	26	0.7	0.18
[4276]	KAMCHATKA ARC	KAMCHATKA ARC / KAMCHATKA ARC / CENTRAL KAMCHATKA SEGMENT / PLOSKIE SOPKY	56	160.5	s_128 [4276]	BASALT [4276]	49.3834	-128.103	50.86	1.24	15	2.2	7.39	9.36956	9.94	8.05	0.17	1.36	2.8	0.36	0.57	60.7304	2.20173	1252.36	1.28796	1500.28	1.13621	7.85714		95.2941	4.47638	1.80315	9.6	0.88	35	7433.8	275	408	41	105		91	16	34	319	26	133	3.4	0.97
[21026]	KAMCHATKA ARC	KAMCHATKA ARC / KAMCHATKA ARC / CENTRAL KAMCHATKA SEGMENT / KLYUCHEVSKOY	56.1253	161.769	s_13KY104-1 [21026]	ANDESITE, BASALTIC [21026]	22.9893	-74.1554	52.179	0.912	16.14			8.41	9.381	7.407	0.161	0.701	3.038	0.155		61.3202	1.52305	1217.46	0.978399	1337.36	1.00148	7.87133							31.212	5467.44	245.68	228.612	35.103	74.04				12.833	316.524	20.276	72.752
[21026]	KAMCHATKA ARC	KAMCHATKA ARC / KAMCHATKA ARC / CENTRAL KAMCHATKA SEGMENT / KLYUCHEVSKOY	56.125	161.769	s_13KY103-2 [21026]	ANDESITE, BASALTIC [21026]	22.9893	-74.1554	52.522	0.91	15.636			8.62	9.092	7.557	0.159	0.638	2.789	0.155		61.2107	1.23339	1220.72	0.920281	1366.59	1.0064	7.88375		185.682	2.71786	1.69964			31.053	5455.45	244.814	265.678	35.885	89.427				12.836	301.433	20.36	73.512	1.48	0.405
[21026]	KAMCHATKA ARC	KAMCHATKA ARC / KAMCHATKA ARC / CENTRAL KAMCHATKA SEGMENT / KLYUCHEVSKOY	55.9883	160.788	s_13KY106-1 [21026]	ANDESITE, BASALTIC [21026]	44.7769	-108.461	52.202	1.003	15.655			8.66	9.329	7.415	0.164	0.768	3.008	0.18		60.6489	1.54946	1225.02	1.00577	1382.17	1.02191	7.88627		205.078	2.77773	1.74177			33.22	6012.98	261.982	254.367	37.055	67.769				13.629	313.28	20.883	80.175	1.2	0.387
[21026]	KAMCHATKA ARC	KAMCHATKA ARC / KAMCHATKA ARC / CENTRAL KAMCHATKA SEGMENT / KLYUCHEVSKOY	55.9911	160.836	s_13KY107-2 [21026]	BASALT [21026]	44.7769	-108.461	51.789	1.003	15.555			8.68	9.281	7.397	0.164	0.759	3.015	0.179		60.5358	1.62056	1227.69	1.0277	1395.95	1.02737	7.92104							32.511	6012.98	257.521	251.793	37.437	69.375				12.799	317.801	21.963	81.492
[4788]	KAMCHATKA ARC	KAMCHATKA ARC / KAMCHATKA ARC / CENTRAL KAMCHATKA SEGMENT / BAKENING	53.93	158.07	s_BAK21A [4788]	BASALT [4788]	46.8831	-150.955	50.07	0.97	16.85	3.34	6.1	9.10533	9.47	8.24	0.19	0.75	2.91	0.26	0.21	61.9618	1.89471	1245.13	1.26626	1444.75	1.06074	7.93103							29	5815.15	230	311	38	117		78	18	11	514	3	101
[4788]	KAMCHATKA ARC	KAMCHATKA ARC / KAMCHATKA ARC / CENTRAL KAMCHATKA SEGMENT / BAKENING	53.93	158.07	s_121 [4788]	BASALT [4788]	46.8831	-150.955	50.7	1.7	15.87	2.94	6.03	8.67541	8.18	8.84	0.15	1.07	3.66	0.44	0.96	64.716	2.90557	1227.98	1.25304	1381.17	1.08915	7.95238							21	10191.5	167	340	40	249		86	16	13	538	32	208
[4276][3509]	KAMCHATKA ARC	KAMCHATKA ARC / KAMCHATKA ARC / CENTRAL KAMCHATKA SEGMENT / KLYUCHEVSKOY	56.05	160.63	s_KLU-08 [4276]	BASALT [4276] / ANDESITE, BASALTIC [3509]	49.2072	-124.087	52.9	1	16.66	2.84	6	8.53	9.41	7.43	0.16	0.8	3.15	0.2	0.51	61.0573	1.57601	1217.19	1.00472	1317.68	0.990479	7.96774	0.734694	145	3.39394	1.69697	8.9	0.62	31	5995	247	221	35	88	72	80	17	12	319	19	98	1.8	0.39
[4276][7063]	KAMCHATKA ARC	KAMCHATKA ARC / KAMCHATKA ARC / CENTRAL KAMCHATKA SEGMENT / ZARECHNY	57.2	159.2	s_90093 [4276]	BASALT [4276]			51.71	0.85	13.64	1.78	7.34	8.94164	9.35	10.43	0.17	1.05	2.7	0.19	0.613	67.7379	1.61452	1228.3	1.06853	1487.75	1.23948	7.96875		250	3.24432	1.75568	7.2	0.49	32	5095.75	255	840	46	141		75	15	18	378	17	62.23	1.16	0.34
[21026]	KAMCHATKA ARC	KAMCHATKA ARC / KAMCHATKA ARC / CENTRAL KAMCHATKA SEGMENT / KLYUCHEVSKOY	55.9997	160.826	s_11KY20 [21026]	BASALT [21026]	44.7769	-108.461	51.86	0.905	16.275			8.34	9.211	7.061	0.158	0.711	3.076	0.159		60.3797	1.61866	1217.64	0.982568	1319.44	0.978559	7.99807							29.987	5425.48	239.838	207.945	34.99	71.338				12.804	317.581	20.408	76.929
[23355]	KAMCHATKA ARC	KAMCHATKA ARC / KAMCHATKA ARC / CENTRAL KAMCHATKA SEGMENT / KHARCHINSKY	56.65	161.4	s_KH98-5 [23355]	BASALT [23355]	33.2484	-100.156	50.64	0.87	13.86			9.1	9.56	12.37	0.16	1.02	2.78	0.2		70.9877	1.89005	1238.67	1.27416	1557.21	1.35574	8	1.55	210.526	4.13534	1.90226			32	5215.65	256	877		268	93	74	14	12.3	432	14.3	60	1.33
[4788][24876]	KAMCHATKA ARC	KAMCHATKA ARC / KAMCHATKA ARC / CENTRAL KAMCHATKA SEGMENT / BAKENING	53.93	158.07	s_BAK04 [4788] / s_BAK-96-04 [24876]	BASALT [4788] / NOT GIVEN [24876]	46.8831	-150.955	48.75	1.13	17.26	2.68	7.09	9.50146	10.47	8.09	0.17	0.7	2.83	0.17	0.25	60.515	2.16711	1265.75	1.47968	1559.98	1.09903	8	0.984375	79.6429	3.94444	1.72222	8.2	0.74	38	6774.35	304	233	38	84	63	69	16	27	429	10	64	2.8	0.38
[23355]	KAMCHATKA ARC	KAMCHATKA ARC / KAMCHATKA ARC / CENTRAL KAMCHATKA SEGMENT / KHARCHINSKY	56.65	161.4	s_KH98-L2 [23355]	BASALT [23355]	33.2484	-100.156	51.09	0.91	14.31			9.42	9.86	10.38	0.17	1.08	2.88	0.23		66.4816	1.93839	1247.26	1.27835	1562.41	1.26127	8.02941	1.78333	145.745	3.93548	1.90968			34	5455.45	273	547		125	107	82	17	15.5	358	16.9	60	1.88
[23355]	KAMCHATKA ARC	KAMCHATKA ARC / KAMCHATKA ARC / CENTRAL KAMCHATKA SEGMENT / KHARCHINSKY	56.65	161.4	s_KH98-L3 [23355]	BASALT [23355]	33.2484	-100.156	51.13	0.91	14.23			9.41	9.67	10.53	0.17	1.1	2.93	0.23		66.8241	1.99765	1246.41	1.27841	1555.39	1.26573	8.0303	1.4375	157.368	4.01235	1.90123			33	5455.45	265	557		131	92	83	18	16.4	383	17.5	64	1.9
[20395]	KAMCHATKA ARC	KAMCHATKA ARC / KAMCHATKA ARC / SOUTHERN KAMCHATKA SEGMENT / GORELY	52.45	158.12	s_OG-703 [20395]	BASALT [20395]	29.7337	-83.535	49.95	1.001	15.82			9.5	9.114	10.59	0.168	0.848	2.76	0.2803	-0.38	66.739	1.87305	1251.89	1.35109	1530.84	1.20223	8.04808	1.01418	101.014	4.3932	1.81344	6.72272	0.807788	31.046	6000.99	249.861	424.152	47.5573	176.845	86.6803	77.8658	15.4999	13.5712	433.26	20.3013	85.4683	2.70835	0.421982
[19962]	KAMCHATKA ARC	KAMCHATKA ARC / KAMCHATKA ARC / CENTRAL KAMCHATKA SEGMENT / TOLBACHIK	55.6725	160.24	s_K01-29 [19962]	BASALT [19962]	49.8102	-135.807	50.3	1.25	13.3			9.68	9.49	10.7	0.17	1.29	2.6	0.33		66.5515	2.07289	1258.51	1.33773	1633.27	1.31648	8.06027	1.04291	135.435					36.5	7493.75	294.2	620.6	46	184	128.8	86.1	14.7	30.9	287.7	25.3	123.5	2.3
[24736]	KAMCHATKA ARC	KAMCHATKA ARC / KAMCHATKA ARC / CENTRAL KAMCHATKA SEGMENT / BAKENING	53.9618	158.447	s_BAK-16-01B [24736]	NOT GIVEN [24736]	45.3532	-140.903	49.94	1.2	17.48			8.67	9.6	8.02	0.16	0.85	3.18	0.28		62.4773	2.34019	1232.99	1.27808	1373.33	1.03683	8.09503	0.547486	79.8646	4.88285	1.89391	7.33461		32.018	7194	259.187	270.837	36.739	119.208	56.8746	64.9375	15.4	15.0338	535.729	22.1137	103.883	3.96713	0.604236
[4276]	KAMCHATKA ARC	KAMCHATKA ARC / KAMCHATKA BACK ARC / SREDINNY RIDGE / ACHTANG	56	157.5	s_ACH-02 [4276]	BASALT [4276]			51.2	0.94	15.97	2.94	5.84	8.48541	9.61	7.89	0.16	1.16	2.86	0.29	0.66	62.5986	1.97078	1222.9	1.09641	1333.83	1.05381	8.1		95.641	5.12281	1.77778	5.4	0.56	30	5635.3	243	337	37	112		78	17	21	530	21	93	3.9	0.41
[4788][24876]	KAMCHATKA ARC	KAMCHATKA ARC / KAMCHATKA ARC / CENTRAL KAMCHATKA SEGMENT / BAKENING	53.93	158.07	s_23/1 [4788]	BASALT [4788] / NOT GIVEN [24876]	46.8831	-150.955	49.8	1.15	15.76	4.3	5.35	9.21914	9.33	9.17	0.16	1.36	3.08	0.39	0.25	64.1629	2.89906	1249.8	1.4101	1453.68	1.16085	8.1	0.285714	41.8667	7.51479	2.13018	6	1.13	30	6894.25	243	539	47	227	34	76	15	28	554	20	119	7.5	0.43
[14355]	KAMCHATKA ARC	KAMCHATKA ARC / KAMCHATKA BACK ARC / SREDINNY RIDGE / OZERNOVSKY LAVA FIELD	57.5943	160.512	s_SR 04 21 [14355]	ANDESITE, BASALTIC [14355]			52.4	1.032	15.6			9.13	7.48	9.01	0.18	1.06	3.18	0.43		63.9814	1.91251	1232.02	1.09293	1357.87	1.05654	8.12	0.439716	74.4118	7.2029	1.87923	9.8		25	6186.84	203	323	44	210	62	98	17	15	519	22	141	6.8	0.25
[20395]	KAMCHATKA ARC	KAMCHATKA ARC / KAMCHATKA ARC / SOUTHERN KAMCHATKA SEGMENT / GORELY	52.45	158.12	s_OG-701 [20395]	BASALT [20395]	29.7337	-83.535	50.67	1.059	16.03			9.11	9	8.88	0.165	1.004	2.94	0.3076	-0.18	63.6965	2.02805	1240.27	1.23229	1428.02	1.10009	8.12569	0.833776	93.6165	4.66671	1.81043	7.85474	0.921028	30.8753	6348.7	250.883	323.59	41.2603	137.941	87.0112	78.1396	15.9665	16.8306	441.54	23.2684	104.358	3.38138	0.523547
[23355]	KAMCHATKA ARC	KAMCHATKA ARC / KAMCHATKA ARC / CENTRAL KAMCHATKA SEGMENT / KHARCHINSKY	56.65	161.4	s_KH98-3 [23355]	ANDESITE, BASALTIC [23355]	33.2484	-100.156	52.7	0.92	14.49			8.63	9.29	9.57	0.15	1.33	3.21	0.25		66.6228	2.12491	1217.9	1.08251	1369.83	1.16882	8.12903	1.4	220.979	4.65753	1.91781			31	5515.4	252	406		95	105	75	19	17.3	439	15.9	75	1.43
[4788][24876]	KAMCHATKA ARC	KAMCHATKA ARC / KAMCHATKA ARC / CENTRAL KAMCHATKA SEGMENT / BAKENING	53.93	158.07	s_BAK17 [4788] / s_BAK-95-17 [24876]	BASALT [4788] / NOT GIVEN [24876]	46.8831	-150.955	51.23	1.15	16.3	2.01	6.52	8.3286	8.9	8.29	0.16	1.01	3.38	0.29	0.6	64.179	2.34169	1216.26	1.12314	1310.88	1.04709	8.13793	0.481481	73.617	5.39216	1.86275	7.4	0.86	29	6894.25	236	349	38	130	52	75	16	21	529	23	108	4.7	0.64
[23355]	KAMCHATKA ARC	KAMCHATKA ARC / KAMCHATKA ARC / CENTRAL KAMCHATKA SEGMENT / KHARCHINSKY	56.65	161.4	s_KH98-L6 [23355]	BASALT [23355]	33.2484	-100.156	50.92	1.05	13.92			9.5	10.15	10.26	0.18	1.22	2.92	0.25		66.0326	2.16409	1252.21	1.33518	1596.44	1.28964	8.17647	1.29333	196.257	4.21965	1.92486			34	6294.75	278	545		110	97	84	16	15.7	472	18.9	75	1.87
[20395]	KAMCHATKA ARC	KAMCHATKA ARC / KAMCHATKA ARC / SOUTHERN KAMCHATKA SEGMENT / GORELY	52.45	158.12	s_OG-706 [20395]	BASALT [20395]	29.7337	-83.535	49.37	0.999	15.55			9.4	8.979	10.43	0.166	0.836	2.77	0.276	-0.238642	66.6359	2.04132	1252.16	1.35292	1535.52	1.20402	8.19271	1.03359	97.5219	4.66065	1.81259	7.15411	0.857845	30.8484	5989.01	252.732	417.527	48.1196	179.438	94.3317	78.1234	15.5882	13.3013	433.161	21.7137	91.266	2.8833	0.410824
[4276]	KAMCHATKA ARC	KAMCHATKA ARC / KAMCHATKA ARC / CENTRAL KAMCHATKA SEGMENT / TOLBACHIK	55.82	160.37	s_201 [4276]	BASALT [4276]	48.3247	-127.348	50.21	1.18	14.17	3.6	6.46	9.69928	9.83	9.61	0.17	1.26	2.61	0.34	0.47	64.0731	2.07724	1262.14	1.35967	1607.16	1.2451	8.21212		95.4839	4.62555	1.87225	10.2	0.9	33	7074.1	271	569	47	168		87	16	34	305	27	124	3.1	0.91
[19962]	KAMCHATKA ARC	KAMCHATKA ARC / KAMCHATKA ARC / CENTRAL KAMCHATKA SEGMENT / TOLBACHIK	55.7138	160.275	s_K01-58 [19962]	TRACHYBASALT [19962]	48.5305	-129.182	50.8	1.24	14.8			9.42	9.13	8.66	0.17	1.33	2.82	0.38		62.3321	2.20801	1251.45	1.27257	1491.12	1.14535	8.23977	1.14957	108.161					34.2	7433.8	281.8	435.5	42	140	159.1	87.2	16.4	32.5	296.2	26.5	138.4	3.1
[4788][24876]	KAMCHATKA ARC	KAMCHATKA ARC / KAMCHATKA ARC / CENTRAL KAMCHATKA SEGMENT / BAKENING	53.93	158.07	s_BAK33 [4788] / s_BAK-95-33 [24876]	BASALT [4788] / NOT GIVEN [24876]	46.8831	-150.955	51.32	1.03	16.76	2.35	6.56	8.67453	9.06	8.32	0.17	0.92	3.14	0.23	0.43	63.322	1.9812	1225.89	1.14924	1342.86	1.0387	8.27586	0.648352	86.6667	4.72906	1.82266	7.5	0.77	29	6174.85	240	315	43	134	59	74	17	19	463	21	91	3.6	0.64
[19962]	KAMCHATKA ARC	KAMCHATKA ARC / KAMCHATKA ARC / CENTRAL KAMCHATKA SEGMENT / TOLBACHIK	55.6857	160.239	s_K01-37 [19962]	TRACHYBASALT [19962]	49.8102	-135.807	50.6	1.26	15.4			9.07	9.77	7.56	0.16	1.39	2.92	0.38		60.0053	2.44422	1245.7	1.26851	1438.79	1.09334	8.27697	1.23621	109					34.3	7553.7	283.9	281.1	40	91.3	165.9	85.9	15.5	31.4	298.9	25.5	134.2	3
[24736]	KAMCHATKA ARC	KAMCHATKA ARC / KAMCHATKA ARC / CENTRAL KAMCHATKA SEGMENT / BAKENING	53.8331	158.049	s_BAK-16-18 [24736]	NOT GIVEN [24736]	46.7522	-149.909	50.55	1.09	16.69			8.78	9.06	9.1	0.17	0.92	2.98	0.26		65.1033	2.01457	1229.71	1.20905	1376.01	1.08349	8.28059	0.87307	93.2745	5.53476	1.90788	4.14677		31.7297	6534.55	262.74	378.155	38.6709	142.724	85.8855	66.9846	14.7	16.1366	512.288	22.3738	98.3719	3.97889	0.706733
[4276][2481][7063]	KAMCHATKA ARC	KAMCHATKA ARC / KAMCHATKA ARC / CENTRAL KAMCHATKA SEGMENT / KHARCHINSKY	56.65	161.4	s_8840 [4276]	BASALT [4276]	33.2484	-100.156	50.64	0.9	13.86	4.49	4.74	8.91	9.62	11.3	0.16	0.95	2.84	0.19	0.74	69.5385	1.88012	1233.58	1.20016	1534.73	1.30078	8.29032		280.508	4.56552	1.97931	7.6	0.48	31	5395.5	257	789	53	262		77	17	11	487	16	65.75	1.18	0.18
[23355]	KAMCHATKA ARC	KAMCHATKA ARC / KAMCHATKA ARC / CENTRAL KAMCHATKA SEGMENT / KHARCHINSKY	56.65	161.4	s_KHAR03-02 [23355]	BASALT [23355]	33.2484	-100.156	51.67	0.97	15.37			8.92	10.63	7.9	0.17	1.54	2.98	0.27	1.04	61.452	2.35645	1236.46	1.2337	1408.82	1.12739	8.29412	1.75342	475.439	5.46667	1.98			34	5815.15	282	222		38	128	82	20	19	640	16.8	73	1.14
[4788][24876]	KAMCHATKA ARC	KAMCHATKA ARC / KAMCHATKA ARC / CENTRAL KAMCHATKA SEGMENT / BAKENING	53.93	158.07	s_BAK30 [4788] / s_BAK-95-30 [24876]	BASALT [4788] / NOT GIVEN [24876]	46.8831	-150.955	50.53	1.08	16.29	2.58	6.56	8.88148	9.22	9.05	0.17	0.94	3.16	0.26	0.32	64.7161	2.2324	1234.33	1.25222	1412.53	1.10839	8.3	0.7	122.258	5.29101	1.90476	8	0.8	30	6474.6	249	377	43	155	63	76	17	19	497	22	90	3.1	0.7
[4788][24876]	KAMCHATKA ARC	KAMCHATKA ARC / KAMCHATKA ARC / CENTRAL KAMCHATKA SEGMENT / MOUNT PESCHANAJA	53.93	158.07	s_O-26 [4788] / s_O-95-26 [24876]	BASALT [4788] / NOT GIVEN [24876]	46.8831	-150.955	50.41	1.1	16.28	2.53	6.42	8.69649	9.06	9.4	0.15	0.9	3.22	0.28	0.23	66.0512	2.29074	1228.49	1.23448	1393.99	1.11688	8.33333	0.434783	97.1429	5.64246	1.89944	7.2	0.69	30	6594.5	250	343	43	167	40	71	17	17	547	20	92	3.5	0.29
[2485][2486]	KAMCHATKA ARC	KAMCHATKA ARC / KAMCHATKA ARC / CENTRAL KAMCHATKA SEGMENT / KLYUCHEVSKOY	56.05	160.63	s_K-5911 [2485]	BASALT [2485]	49.2072	-124.087	52.22	0.93	14.94			8.39	9.66	7.96	0.17	0.94	2.87	0.18		63.0689	1.57441	1215.6	0.959403	1365.05	1.0718	8.34483	0.931818	295					29	5575.35	242	357		81	82	75	12	14	334	19	88	1
[19962]	KAMCHATKA ARC	KAMCHATKA ARC / KAMCHATKA ARC / CENTRAL KAMCHATKA SEGMENT / TOLBACHIK	55.7223	160.289	s_K01-25 [19962]	BASALT [19962]	48.5305	-129.182	50.9	0.88	13.5			8.99	11.3	10.6	0.17	0.72	2.31	0.18		67.9729	1.16214	1234.86	1.09247	1637.79	1.31595	8.35648	2.2571	129.801	3.39106	1.87151	7.14		43.2	5275.6	361	513	44.6	146	151	76	15.4	14.5	292	19.1	66.9	1.51	0.45
[21026]	KAMCHATKA ARC	KAMCHATKA ARC / KAMCHATKA ARC / CENTRAL KAMCHATKA SEGMENT / KLYUCHEVSKOY	56.05	160.63	s_11KY104-1 [21026]	ANDESITE, BASALTIC [21026]	49.2072	-124.087	51.931	0.962	15.487			8.43	9.364	7.791	0.162	0.669	2.899	0.167		62.4562	1.42544	1217.32	0.953837	1371.78	1.0363	8.38207		123.681	2.76395	1.7279			29.701	5767.19	248.956	289.639	35.487	76.407				12.91	290.398	21.241	77.692	1.923	0.404
[2485]	KAMCHATKA ARC	KAMCHATKA ARC / KAMCHATKA ARC / CENTRAL KAMCHATKA SEGMENT / KLYUCHEVSKOY	56.05	160.63	s_K-32 [2485]	BASALT [2485]	49.2072	-124.087	52.7	0.89	14.87			7.97	9.01	8.09	0.16	0.93	2.9	0.17		64.6281	1.51226	1199.97	0.846742	1279.4	1.04106	8.39286	0.975904						28	5335.55	235	386		102	81	69	15	14	323	18	83	0
[4276][2475]	KAMCHATKA ARC	KAMCHATKA ARC / KAMCHATKA ARC / CENTRAL KAMCHATKA SEGMENT / KHARCHINSKY	56.4529	160.809	s_8837 [4276]	BASALT [4276] / ANDESITE, BASALTIC [2475]	49.9148	-121.928	50.08	0.88	13.46	3.95	5.42	8.8	9.62	12.29	0.16	0.89	2.69	0.18	0.69	71.5413	1.81023	1231.87	1.20539	1560.24	1.36337	8.4		275.833	4.47586	2.01379	7.4	0.49	30	5275.6	252	862	50	255		81	17	12	476	16	66	1.2	0.28
[23355]	KAMCHATKA ARC	KAMCHATKA ARC / KAMCHATKA ARC / CENTRAL KAMCHATKA SEGMENT / KHARCHINSKY	56.65	161.4	s_KH98-10 [23355]	BASALT [23355]	33.2484	-100.156	51.78	0.88	14.96			8.78	10.23	8.73	0.16	1.6	2.9	0.25		64.1545	2.30638	1229.38	1.18667	1382.99	1.15873	8.4	1.6	371.831	5.87838	1.93243			35	5275.6	294	319		69	112	73	17	18.2	614	16.3	70	1.42
[23355]	KAMCHATKA ARC	KAMCHATKA ARC / KAMCHATKA ARC / CENTRAL KAMCHATKA SEGMENT / KHARCHINSKY	56.65	161.4	s_KH98-8 [23355]	ANDESITE, BASALTIC [23355]	33.2484	-100.156	52.27	0.96	15.32			8.74	9.56	8.84	0.16	1.17	3.14	0.22		64.5465	2.00389	1223.54	1.11323	1380.94	1.12031	8.41935	1.22535	215.476	4.17219	1.89404			31	5755.2	261	352		87	87	77	17	13.9	456	16.5	71	1.68
[4788][24876]	KAMCHATKA ARC	KAMCHATKA ARC / KAMCHATKA ARC / CENTRAL KAMCHATKA SEGMENT / BAKENING	53.93	158.07	s_BAK31 [4788] / s_BAK-95-31 [24876]	BASALT [4788] / NOT GIVEN [24876]	46.8831	-150.955	50.26	1.09	16.1	2.24	6.89	8.90555	9.32	9.15	0.17	0.95	3.21	0.26	0.27	64.905	2.38369	1237.08	1.28806	1434.14	1.12843	8.43333	0.747253	93.0233	5.78378	1.94595	8.5	0.8	30	6534.55	253	394	44	155	68	76	17	22	505	21	91	4.3	0.76
[19962]	KAMCHATKA ARC	KAMCHATKA ARC / KAMCHATKA ARC / CENTRAL KAMCHATKA SEGMENT / TOLBACHIK	55.7878	160.335	s_K01-52 [19962]	TRACHYBASALT [19962]	49.5799	-134.061	50.4	1.25	14.6			9.19	9.75	8.51	0.17	1.34	2.85	0.38		62.502	2.37245	1248.4	1.28337	1501.5	1.16672	8.45015	1.24039	112.893					33.1	7493.75	279.7	430.6	41	128	164.6	86.6	15.5	30	284.4	25	132.7	2.8
[21486]	KAMCHATKA ARC	KAMCHATKA ARC / KAMCHATKA ARC / CENTRAL KAMCHATKA SEGMENT / TOLBACHIK	55.7878	160.335	s_K01-52 [21486]	BASALT [21486]	49.5799	-134.061	50.4	1.25	14.6			9.19	9.75	8.51	0.17	1.34	2.85	0.38		62.502	2.37245	1248.4	1.28337	1501.5	1.16672	8.45921		112.857					33.1	7493.75	280	431	41	128		86.6	15.5	30	284	25	133	2.8
[4788]	KAMCHATKA ARC	KAMCHATKA ARC / KAMCHATKA ARC / CENTRAL KAMCHATKA SEGMENT / BAKENING	53.93	158.07	s_BAK37 [4788]	BASALT [4788]	46.8831	-150.955	50.37	1.09	16.3	2.26	6.86	8.89355	9.27	8.84	0.17	0.95	3.15	0.26	0.2	64.1469	2.28087	1236.18	1.26275	1416.68	1.10217	8.46667	0.703297	112.353	5.58511	1.96809	6.1	0.76	30	6534.55	254	360	41	152	64	76	17	25	512	20	91	3.4	0.71
[2475][2195]	KAMCHATKA ARC	KAMCHATKA ARC / KAMCHATKA ARC / EASTERN KAMCHATKA SEGMENT / MALYI SEMYACHIK	54.12	159.88	s_C-608 [2475]	ANDESITE [2475]	33.359	-74.6665	48.8	0.73	16.5			10.44	9.35	9.61	0.2	0.39	2.19	0.13	0.4	62.3621	1.14766	1287.91	1.46178	1694.95	1.1531	8.47682		31.75	2.8	1.75			30.2	4376.35	256		43.8	79		82		8	365	20	82	4	0.29
[4788]	KAMCHATKA ARC	KAMCHATKA ARC / KAMCHATKA ARC / CENTRAL KAMCHATKA SEGMENT / BAKENING	53.93	158.07	s_BAK61 [4788]	BASALT [4788]	46.8831	-150.955	50.4	1.06	16.7	3	6.25	8.9494	9.07	8.51	0.16	0.89	3.16	0.23	0.56	63.1217	2.21655	1237.59	1.25648	1402.68	1.06743	8.5							30	6354.7	255	329	39	141		81	20	14	496	16	88
[23355]	KAMCHATKA ARC	KAMCHATKA ARC / KAMCHATKA ARC / CENTRAL KAMCHATKA SEGMENT / KHARCHINSKY	56.65	161.4	s_KH98-7 [23355]	BASALT [23355]	33.2484	-100.156	51.5	0.97	14.89			8.88	9.73	9.56	0.17	1.11	3.09	0.22		65.9614	2.07529	1230.22	1.18299	1448.23	1.18452	8.51613	1.28767	195.906	4.22078	1.91558			31	5815.15	264	430		107	94	79	16	13.1	447	16.8	73	1.71
[2485]	KAMCHATKA ARC	KAMCHATKA ARC / KAMCHATKA ARC / CENTRAL KAMCHATKA SEGMENT / KLYUCHEVSKOY	56.05	160.63	s_K-597 [2485]	BASALT [2485]	49.2072	-124.087	52.39	0.94	15.06			8.49	9.6	7.87	0.17	0.93	2.72	0.17		62.5265	1.4188	1217.65	0.94296	1365.69	1.05778	8.53571	0.835165	301					28	5635.3	239	310		74	76	71	13	12	344	19	91	1
[12935]	KAMCHATKA ARC	KAMCHATKA ARC / KAMCHATKA ARC / CENTRAL KAMCHATKA SEGMENT	58	157.5	s_O-56 [12935]	DOLERITE, ILMENITE [12935]			50.3	1.19	17.24			7.39	8.71	6.59	0.16	1.72	2.52	0.14	3.2	61.6144	2.46268	1195.85	0.986408	1081.58	0.906682	8.59259	0.71708	216.207	2.19886	1.63636			27	7134.05	232	226	37	75	55	49		41.3	504	19.5	76.7	2.9	0.37
[22526]	KAMCHATKA ARC	KAMCHATKA ARC / KAMCHATKA ARC / CENTRAL KAMCHATKA SEGMENT / AVACHA (AVACHINSKY)	53.291	158.751	s_AVA-17-08 [22526]	BASALT [22526]	33.5004	-87.138	50.9	1.019	16.33			9.45	9.61	8.65	0.182	0.82	2.97	0.21		62.2302	1.81824	1250.5	1.28772	1498.67	1.10453	8.59375	0.940476	95.1351	3.15789				32	6108.9	275	354	41	119	79	81	18	13	499	21.7	84	3.7
[21026]	KAMCHATKA ARC	KAMCHATKA ARC / KAMCHATKA ARC / CENTRAL KAMCHATKA SEGMENT / KLYUCHEVSKOY	56.1153	160.71	s_11KY-10 [21026]	ANDESITE, BASALTIC [21026]	47.636	-117.247	52.485	0.97	16.026			8.39	9.366	7.773	0.161	0.762	3.043	0.186		62.5135	1.52641	1214.2	0.970362	1331.21	1.01907	8.60184							28.215	5815.15	242.701	269.448	35.193	87.821				14.915	309.265	21.61	85.432
[12740]	KAMCHATKA ARC	KAMCHATKA ARC / KAMCHATKA ARC / CENTRAL KAMCHATKA SEGMENT	59	161	s_2082-6 [12740]	BASALT [12740]			51.01	0.81	16.23			8.88	8.44	9.5	0.19	1.05	2.68	0.21		65.8199	1.73694	1229.07	1.13038	1346.78	1.08474	8.60576		107.541	6.46875	1.82812	16.41	1	29.88	4855.95	257.14	410.54	45.18	160.53				27.68	368.69	18.65	116.8	3.14	1.51
[21668]	KAMCHATKA ARC	KAMCHATKA ARC / KAMCHATKA ARC / CENTRAL KAMCHATKA SEGMENT / TOLBACHIK	55.7949	160.332	s_TOL-1 [21668]	BASALT [21668]	49.5799	-134.061	50.83	1.24	14.89			9.75	9.781	8.78	0.18	1.35	2.83	0.381	-0.79	61.8455	2.23147	1262.32	1.37582	1557.35	1.18096	8.61311	1.93404	90.2329	4.5156	1.90271	8.9	0.97	30.5	7433.8	262.7	1165	42.47	581.4	272.7	97	16.69	30.9	300.3	25.61	141	3.563	0.809
[20025]	KAMCHATKA ARC	KAMCHATKA ARC / KAMCHATKA ARC / CENTRAL KAMCHATKA SEGMENT / TOLBACHIK	55.7904	160.338	s_1941A [20025]	BASALT [20025]	49.5799	-134.061	50.83	1.24	14.9			9.8	9.8	8.8	0.18	1.4	2.8	0.38		61.7785	2.25287	1263.65	1.38876	1557.72	1.18384	8.62295	1.20567	90.4494	4.5082	1.90164	8.9	0.97	30.5	7433.8	263	404	42.5	165	170	97	16.69	30.9	300	25.6	141	3.56	0.81
[21486]	KAMCHATKA ARC	KAMCHATKA ARC / KAMCHATKA ARC / CENTRAL KAMCHATKA SEGMENT / TOLBACHIK	55.7903	160.335	s_TOL-1 [21486]	BASALT [21486]	49.5799	-134.061	50.83	1.24	14.9			9.8	9.8	8.8	0.18	1.4	2.8	0.38		61.7785	2.25287	1263.65	1.38876	1557.72	1.18384	8.62295	1.20567	90.4494	4.5082	1.90164	8.9	0.97	30.5	7433.8	263	404	42.5	165	170	97	16.6	30.9	300	25.6	141	3.56	0.81
[23448]	KAMCHATKA ARC	KAMCHATKA ARC / KAMCHATKA ARC / CENTRAL KAMCHATKA SEGMENT / TOLBACHIK	55.7903	160.335	s_TOL-1 (220914?) [23448]	BASALT [23448]	49.5799	-134.061	50.83	1.24	14.9			9.8	9.8	8.8	0.18	1.4	2.8	0.38		61.7785	2.25287	1263.65	1.38876	1557.72	1.18384	8.62295	1.20567	90.4494	4.5082	1.90164	8.9	0.97	30.5	7433.8	263	404	42.5	165	170	97	16.6	30.9	300	25.6	141	3.56	0.81
[2475][2195]	KAMCHATKA ARC	KAMCHATKA ARC / KAMCHATKA ARC / CENTRAL KAMCHATKA SEGMENT / AVACHA (AVACHINSKY)	53.256	158.836	s_29M [2475]	BASALT [2475]	33.5004	-87.138	49.1	1.15	15.5			9.54	10.1	9.96	0.18	0.77	2.68	0.24	0.3	65.2687	1.95123	1260.94	1.42043	1621.33	1.22719	8.67089		72.0833	4.95	1.85			31.6	6894.25	274	470	55.4	154		94			456	19.9	74.7	4.8	0.2
[4788][24876]	KAMCHATKA ARC	KAMCHATKA ARC / KAMCHATKA ARC / CENTRAL KAMCHATKA SEGMENT / BAKENING	53.93	158.07	s_23 [4788]	BASALT [4788] / NOT GIVEN [24876]	46.8831	-150.955	49.7	1.16	15.76	2.81	6.79	9.31844	9.33	9.3	0.16	1.35	3.05	0.39	0.14	64.2402	2.88955	1252.69	1.43292	1469.78	1.17002	8.67857	0.649573	43.8667	7.53012	2.16867	6.4	0.98	28	6954.2	243	545	43	230	76	75	17	26	558	21	117	7.5	0.6
[2475][22052][2195]	KAMCHATKA ARC	KAMCHATKA ARC / KAMCHATKA ARC / CENTRAL KAMCHATKA SEGMENT / PLOSKIY	56.2	160.63	s_3/OB [2475] / s_3-PLOSKY/OB [22052]	BASALT [2475] / NOT GIVEN [22052]	50.3925	-126.867	49.9	1.15	14	4.56	5.44	9.54	10.2	9.44	0.18	1.16	2.44	0.33	0.15	64.0434	1.87826	1259.15	1.31076	1621.57	1.248	8.73846		67.5	4.72	1.76			32.5	6894.25	284	464	40.2	147		89			303	22.3	104	4.4	0.86
[23355]	KAMCHATKA ARC	KAMCHATKA ARC / KAMCHATKA ARC / CENTRAL KAMCHATKA SEGMENT / KHARCHINSKY	56.65	161.4	s_KH98-6 [23355]	BASALT [23355]	33.2484	-100.156	50.52	0.87	13.95			8.97	9.69	12.29	0.16	0.98	2.81	0.2		71.1501	1.91012	1235.38	1.26277	1547.26	1.3514	8.75	1.5303	205.195	4.33333	1.90667			32	5215.65	280	864		236	101	75	17	11.4	479	16.4	66	1.54
[2485]	KAMCHATKA ARC	KAMCHATKA ARC / KAMCHATKA ARC / CENTRAL KAMCHATKA SEGMENT / KLYUCHEVSKOY	56.05	160.63	s_K-593A [2485]	BASALT [2485]	49.2072	-124.087	52.42	0.93	15.59			8.01	8.98	6.76	0.17	0.98	3.38	0.16		60.3033	2.018	1207.85	0.943658	1262.59	0.977559	8.77778	0.791209	148					27	5575.35	237	211		55	72	72	17	14	345	18	91	2
[2485]	KAMCHATKA ARC	KAMCHATKA ARC / KAMCHATKA ARC / CENTRAL KAMCHATKA SEGMENT / KLYUCHEVSKOY	56.05	160.63	s_K-33 [2485]	BASALT [2485]	49.2072	-124.087	52.82	0.86	14.91			7.99	9.89	7.43	0.16	0.96	2.79	0.14		62.6006	1.43203	1202.73	0.848777	1300.62	1.03588	8.89286	1.2125	298					28	5155.7	249	216		58	97	67	16	11	362	15	80	1
[20025]	KAMCHATKA ARC	KAMCHATKA ARC / KAMCHATKA ARC / CENTRAL KAMCHATKA SEGMENT / TOLBACHIK	55.7965	160.333	s_1941C [20025]	BASALT [20025]	49.5799	-134.061	50.56	1.2	14.7			9.6	9.8	9	0.18	1.3	2.8	0.36		62.7907	2.22354	1258.1	1.35015	1555.21	1.19561	8.99666	1.16912	92.3529	4.47257	1.89873	8.8	0.85	29.9	7194	269	366	42	143	159	91	16.44	28.9	303	24.8	136	3.4	0.76
[23448]	KAMCHATKA ARC	KAMCHATKA ARC / KAMCHATKA ARC / CENTRAL KAMCHATKA SEGMENT / TOLBACHIK	55.7966	160.334	s_TOL-4 (220914?) [23448]	BASALT [23448]	49.5799	-134.061	50.56	1.2	14.7			9.6	9.8	9	0.18	1.3	2.8	0.36		62.7907	2.22354	1258.1	1.35015	1555.21	1.19561	8.99666	1.16912	92.3529	4.47257	1.89873	8.8	0.85	29.9	7194	269	366	42	143	159	91	16.4	28.9	303	24.8	136	3.4	0.76
[21668][21486]	KAMCHATKA ARC	KAMCHATKA ARC / KAMCHATKA ARC / CENTRAL KAMCHATKA SEGMENT / TOLBACHIK	55.7949	160.332	s_TOL-4 [21668]	BASALT [21668]	49.5799	-134.061	50.56	1.2	14.68			9.56	9.77	9	0.177	1.31	2.76	0.363	-0.78	62.8882	2.19112	1256.99	1.3365	1547.93	1.193	9.01003	1.82059	92.2873	4.48145	1.89882	8.8	0.85	29.9	7194	269.4	943	42.01	440.6	247.6	91	16.44	28.87	303	24.81	136	3.397	0.764
[13270]	KAMCHATKA ARC	KAMCHATKA ARC / KAMCHATKA ARC / CENTRAL KAMCHATKA SEGMENT	63	167	s_134-11 [13270]	BASALT [13270]			49.75	1.77	17.16			9.55	9.45	7.98	0.16	0.71	3.15	0.32		60.0652	2.20735	1260.64	1.43024	1541.49	1.06428	9.0625			5.41667				32	10611.1	290	240	36	132				9	851	19	145
[4788]	KAMCHATKA ARC	KAMCHATKA ARC / KAMCHATKA ARC / CENTRAL KAMCHATKA SEGMENT / BAKENING	53.93	158.07	s_BAK41 [4788]	BASALT [4788]	46.8831	-150.955	51.5	1.02	16.99	1.91	6.74	8.45862	8.91	7.56	0.17	0.92	3.21	0.23	0.41	61.6678	2.00669	1220.78	1.09699	1294.53	0.986483	9.15385	0.565217	93.125	4.74747	1.81818	7.5	0.74	26	6114.9	238	259	38	111	52	73	17	18	475	22	92	3.2	0.6
[21668]	KAMCHATKA ARC	KAMCHATKA ARC / KAMCHATKA ARC / CENTRAL KAMCHATKA SEGMENT / TOLBACHIK	55.7949	160.332	s_TOL-2 [21668]	BASALT [21668]	49.5799	-134.061	51	1.23	14.95			9.73	9.829	8.76	0.177	1.34	2.84	0.381	-0.74	61.8401	2.18405	1260.48	1.36062	1550.48	1.17695	9.18305	1.82313	87.4656	4.48262	1.89983	9	0.89	29.5	7373.85	270.9	1184	43.12	572.2	268	97	16.8	29.29	299.7	24.88	147	3.63	0.739
[20025]	KAMCHATKA ARC	KAMCHATKA ARC / KAMCHATKA ARC / CENTRAL KAMCHATKA SEGMENT / TOLBACHIK	55.792	160.339	s_1941B [20025]	BASALT [20025]	49.5799	-134.061	51	1.23	15			9.7	9.8	8.8	0.18	1.3	2.8	0.38		62.0204	2.10125	1259.17	1.34404	1547.08	1.17311	9.18644	1.12925	87.6033	4.46281	1.89669	9	0.89	29.5	7373.85	271	320	43.1	132	166	97	16.8	29.3	300	24.9	147	3.63	0.74
[21486]	KAMCHATKA ARC	KAMCHATKA ARC / KAMCHATKA ARC / CENTRAL KAMCHATKA SEGMENT / TOLBACHIK	55.789	160.337	s_TOL-2 [21486]	BASALT [21486]	49.5799	-134.061	51	1.23	15			9.7	9.8	8.8	0.18	1.3	2.8	0.38		62.0204	2.10125	1259.17	1.34404	1547.08	1.17311	9.18644	1.12925	87.6033	4.46281	1.89669	9	0.89	29.5	7373.85	271	320	43.1	132	166	97	16.8	29.3	300	24.9	147	3.63	0.74
[23448]	KAMCHATKA ARC	KAMCHATKA ARC / KAMCHATKA ARC / CENTRAL KAMCHATKA SEGMENT / TOLBACHIK	55.789	160.337	s_TOL-2 (220914?) [23448]	BASALT [23448]	49.5799	-134.061	51	1.23	15			9.7	9.8	8.8	0.18	1.3	2.8	0.38		62.0204	2.10125	1259.17	1.34404	1547.08	1.17311	9.18644	1.12925	87.6033	4.46281	1.89669	9	0.89	29.5	7373.85	271	320	43.1	132	166	97	16.8	29.3	300	24.9	147	3.63	0.74
[4276][7063]	KAMCHATKA ARC	KAMCHATKA ARC / KAMCHATKA ARC / CENTRAL KAMCHATKA SEGMENT / PLOSKIE SOPKY	56	160.5	s_3-90 [4276]	BASALT [4276]	49.3834	-128.103	50.1	0.86	15.79	3	6.68	9.3794	10.26	7.84	0.17	0.99	2.57	0.22	0.65	60.073	1.78501	1255.98	1.27583	1516.37	1.10422	9.1875		238.462	4.13376	1.71975	7.1	0.45	32	5155.7	294	312	39	82		87	16	18	450	16	60.1	1.17	0.38
[4788]	KAMCHATKA ARC	KAMCHATKA ARC / KAMCHATKA ARC / CENTRAL KAMCHATKA SEGMENT / MOUNT PESCHANAJA	53.93	158.07	s_O-40 [4788]	BASALT [4788]	46.8831	-150.955	49.77	1.2	16.84	3.1	6.12	8.90938	9.6	8.61	0.16	0.88	3.24	0.24	0.31	63.4972	2.5073	1240.5	1.34246	1434.64	1.0951	9.19355	0.565217	93.1429	4.81481	1.90476	6.8	0.7	31	7194	285	283	44	127	52	71	17	12	518	23	92	3.5	0.57
[2481]	KAMCHATKA ARC	KAMCHATKA ARC / KAMCHATKA ARC / CENTRAL KAMCHATKA SEGMENT / TOLBACHIK	55.53	160.27	s_7-889 [2481]	BASALT [2481]	46.5176	-118.504	50.4	1.26	13			10.26	9.45	11	0.19	1.24	2.35	0.35	-0.15	65.8683	1.74164	1275.46	1.39645	1733.47	1.34714	9.29448		132.222	4.52	1.88			32.6	7553.7	303	417		202					314	24.8	115	2.7
[2475][2195]	KAMCHATKA ARC	KAMCHATKA ARC / KAMCHATKA ARC / CENTRAL KAMCHATKA SEGMENT / TOLBACHIK	55.53	160.27	s_T-889 [2475] / s_T889 [2195]	BASALT [2475]	46.5176	-118.504	50.4	1.26	13			10.26	9.45	11	0.19	1.24	2.35	0.35	0.15	65.8683	1.74164	1275.46	1.39645	1733.47	1.34714	9.29448		132.222	4.85714	1.75			32.6	7553.7	303	724	44.6	202		115			314	24.8	115	2.7	0.87
[22560]	KAMCHATKA ARC	KAMCHATKA ARC / KAMCHATKA ARC / CENTRAL KAMCHATKA SEGMENT / KARYMSKY	53.7	158.1	s_S-608 [22560]	BASALT [22560]	44.2015	-137.989	47.91	0.78	16.81	3.78	7.72	11.1212	9.58	9.63	0.19	0.42	2.23	0.13	0.55	60.9167	1.43024	1315.46	1.73182	1807.15	1.18527	9.55556	1.59574	80.625	2.85714	1.78912			27	4676.1	258	102	53	99	75	83	17.9	5	349	16	47	1.6	0.29
[15280]	KAMCHATKA ARC	KAMCHATKA ARC / KAMCHATKA ARC / CENTRAL KAMCHATKA SEGMENT / KARYMSKY	54.07	159.6	s_C608 [15280]	BASALT [15280]	36.5692	-86.8428	47.91	0.78	16.81	3.78	7.72	11.1212	9.58	9.63	0.19	0.42	2.23	0.13	0.55	60.9167	1.43024	1315.46	1.73182	1807.15	1.18527	9.55556	1.59574	80.625	2.85714	1.78912			27	4676.1	258	102	53	99	75	83	17.9	5	349	16	47	1.6	0.29
[4788]	KAMCHATKA ARC	KAMCHATKA ARC / KAMCHATKA ARC / CENTRAL KAMCHATKA SEGMENT / BAKENING	53.93	158.07	s_BAK62 [4788]	BASALT [4788]	46.8831	-150.955	50.4	1.07	16.65	2.83	6.45	8.99643	9.09	8.61	0.17	0.91	3.2	0.23	0.46	63.2715	2.28272	1239	1.27705	1411.25	1.07737	9.57692							26	6414.65	249	337	42	170		80	16	18	494	20	86
[4788]	KAMCHATKA ARC	KAMCHATKA ARC / KAMCHATKA ARC / CENTRAL KAMCHATKA SEGMENT / BAKENING	53.93	158.07	s_BAK44 [4788]	BASALT [4788]	46.8831	-150.955	52.08	1.05	17.07	2.72	5.92	8.36746	8.51	7.47	0.15	0.91	3.48	0.26	0.16	61.6409	2.12248	1215.46	1.06837	1263.11	0.966758	9.69565	0.509804	99.4444	5.63536	1.98895	6.9	0.9	23	6294.75	223	285	36	126	52	74	17	18	525	22	102	3.6	0.3
[22560]	KAMCHATKA ARC	KAMCHATKA ARC / KAMCHATKA ARC / CENTRAL KAMCHATKA SEGMENT / KARYMSKY	53.7	158.1	s_S-564 [22560]	BASALT [22560]	44.2015	-137.989	47.37	0.64	16.22	3.02	8.26	10.9774	10.71	11.1	0.19	0.31	1.81	0.07	0.45	64.5403	1.02847	1312	1.73236	1890.28	1.30486	9.83871	5.28	117.5	1.71681	1.76991			31	3836.8	305	67	56	72	132	80	15.5	2	285	10	25	0.8	0.11
[15280]	KAMCHATKA ARC	KAMCHATKA ARC / KAMCHATKA ARC / CENTRAL KAMCHATKA SEGMENT / KARYMSKY	54.07	159.6	s_C564 [15280]	BASALT [15280]	36.5692	-86.8428	47.37	0.64	16.22	3.02	8.26	10.9774	10.71	11.1	0.19	0.31	1.81	0.07	0.45	64.5403	1.02847	1312	1.73236	1890.28	1.30486	9.83871	5.28	117.5	1.71681	1.76991			31	3836.8	305	67	56	72	132	80	15.5	2	285	10	25	0.8	0.11
[19962]	KAMCHATKA ARC	KAMCHATKA ARC / KAMCHATKA ARC / CENTRAL KAMCHATKA SEGMENT / TOLBACHIK	55.6965	160.247	s_K01-63 [19962]	BASALT [19962]	49.8102	-135.807	51.2	1.08	14.4			8.7	8.38	9.32	0.15	1.45	3.09	0.3		65.8502	2.51361	1225.82	1.14107	1363.96	1.14865	9.972	1.08239	201.739					25	6474.6	249.3	431.5	40	151.2	124.8	79.9	17.1	25	355	19.9	115.3	2.3
[2481]	KAMCHATKA ARC	KAMCHATKA ARC / KAMCHATKA ARC / CENTRAL KAMCHATKA SEGMENT / KHARCHINSKY	56.65	161.4	s_8845 [2481]	BASALT [2481]	33.2484	-100.156	51.8	1.05	14.4			8.56	9.99	8.15	0.16	1.4	2.89	0.29	0.62	63.1511	2.09138	1223.68	1.07941	1389.07	1.1306	10.0649		100.698					30.8	6294.75	310	256		62					521	16.1	72.1	4.3
[3988][4769]	KAMCHATKA ARC	KAMCHATKA ARC / KAMCHATKA ARC / CENTRAL KAMCHATKA SEGMENT / KLYUCHEVSKOY	56.01	160.1	s_KL-3 [3988]	BASALT [3988]	55.0166	-158.796	50.9	0.8	13.7	10.14		8.7	9.9	12.1	0.17	0.5	2.2	0.13	0.91	71.4567	0.922785	1222.3	0.997601	1561.12	1.31352		1.32075	1130	2.75		6.8		40	4796		580	52	19	70			5.9	293	15	53	0.1
[3988][4769]	KAMCHATKA ARC	KAMCHATKA ARC / KAMCHATKA ARC / CENTRAL KAMCHATKA SEGMENT / KLYUCHEVSKOY	56.01	160.1	s_KL-5 [3988]	BASALT [3988]	55.0166	-158.796	51.4	0.7	13.5	10.77		8.6	9.6	11.6	0.17	0.6	2.4	0.12	1.24	70.8277	1.07143	1217.91	0.958354	1514.84	1.28368		1.33333	232	2.47368		6.3		41	4196.5		570	51	29	72			7.2	249	17	54	0.5
[15897][7640]	KAMCHATKA ARC	KAMCHATKA ARC / KAMCHATKA ARC / CENTRAL KAMCHATKA SEGMENT / ZARECHNY	57.2	159.2	s_1002/1C [15897]	ANDESITE, BASALTIC [15897] / BASALT [7640]			52.54	0.86	12.37	3.08	5.7	8.47138	8.5	11.48	0.16	1.42	2.84	0.24	0.4	70.9241	1.90226	1211.09	0.974374	1400.63	1.29217			252	6.18301				29.9	5155.7		906	45.9	186				14	710	18	79	3	0.53
[15897][3048][7640]	KAMCHATKA ARC	KAMCHATKA ARC / KAMCHATKA ARC / CENTRAL KAMCHATKA SEGMENT / ZARECHNY	57.2	159.2	s_1002/2T [15897] / s_1002/2 [3048] / s_1002/2C [7640]	ANDESITE, BASALTIC [15897] / BASALT, OLIVINE-CLINOPYROXENE [3048] / BASALT [7640]			51.64	0.9	12.36	4.32	4.9	8.78714	8.74	11.2	0.16	1.42	2.76	0.23	0.33	69.6442	2.02227	1225.96	1.07463	1470.14	1.3081				6.51333				29.9	5395.5		1068	40	213					707				0.56
[15897][7640][7862]	KAMCHATKA ARC	KAMCHATKA ARC / KAMCHATKA ARC / CENTRAL KAMCHATKA SEGMENT / ZARECHNY	57.2	159.2	s_1002/4K [15897] / s_1002/4C [15897] / s_1002/4 [7862]	ANDESITE, BASALTIC [15897] / BASALT [7640] / ADAKITE [7862]			52.3	0.87	12.53	3.45	5.44	8.54431	8.62	11.88	0.16	1.35	2.69	0.23	0.43	71.4507	1.75501	1213.99	0.993874	1423.38	1.30937				6.20548				28.9	5215.65		10.29	46.6	209				16	696				0.42
[7640]	KAMCHATKA ARC	KAMCHATKA ARC / KAMCHATKA ARC / CENTRAL KAMCHATKA SEGMENT / TOLBACHIK	55.82	160.37	s_6011 [7640]	BASALT, OLIVINE-CLINOPYROXENE [7640]	48.3247	-127.348	49.76	0.89	14.91	1.76	7.52	9.10365	11.62	9.74	0.19	0.81	2.03	0.23	0.26	65.8216	1.19314	1244.55	1.19994	1606.89	1.24826				3.28638				46	5335.55		626	32	113				18	319	20	80		0.54
[7640]	KAMCHATKA ARC	KAMCHATKA ARC / KAMCHATKA ARC / CENTRAL KAMCHATKA SEGMENT / TOLBACHIK	55.82	160.37	s_F857C [7640]	BASALT, OLIVINE-CLINOPYROXENE [7640]	48.3247	-127.348	50.22	0.92	14.13			9.33	10.93	10.12	0.18	0.88	2.38	0.28		66.1294	1.47197	1249.31	1.23804	1636.61	1.28274				3.40394				43	5515.4		651	43	137					318				0.54
[15404]	KAMCHATKA ARC	KAMCHATKA ARC / KAMCHATKA ARC / CENTRAL KAMCHATKA SEGMENT / TOLBACHIK	55.6819	160.239	s_6022 [15404]	BASALT [15404]	49.8102	-135.807	51.25	0.95	13.81			8.67	11.88	9.8	0.18	0.84	2.42	0.21	-0.37	67.0468	1.28819	1225.74	1.05902	1578.91	1.27891			136.538	4.86486				42.8	5695.25		430		107				15.5	293	19.3	68	1.56	0.46
[15897]	KAMCHATKA ARC	KAMCHATKA ARC / KAMCHATKA ARC / CENTRAL KAMCHATKA SEGMENT / KHARCHINSKY	56.65	161.4	s_5605/2T [15897]	BASALT [15897]	33.2484	-100.156	49.8	0.93	13.35	4.39	4.98	8.93012	8.75	12.32	0.16	1.1	2.82	0.2		71.2914	2.25976	1236.96	1.26591	1533.52	1.35504				4.42953				31.4	5575.35		862	48.1					11					0.23
[15897]	KAMCHATKA ARC	KAMCHATKA ARC / KAMCHATKA ARC / CENTRAL KAMCHATKA SEGMENT / KHARCHINSKY	56.65	161.4	s_1007T [15897]	ANDESITE, BASALTIC [15897]	33.2484	-100.156	52.35	0.94	14.98	3.77	5.24	8.63225	6.94	9.66	0.16	1.3	2.97	0.38		66.8249	1.95004	1214.83	0.981655	1270.46	1.07213				3.71658				32.4	5635.3		473	41.6	114					443				0.45
[15897]	KAMCHATKA ARC	KAMCHATKA ARC / KAMCHATKA ARC / CENTRAL KAMCHATKA SEGMENT / KHARCHINSKY	56.65	161.4	s_1006G [15897]	ANDESITE, BASALTIC [15897]	33.2484	-100.156	52.6	0.83	13.789	3.3	6.54	9.50934	8.9	9.52	0.14	1.3	2.44	0.22		64.3114	1.45704	1242.37	1.0654	1482.69	1.17631				2.92965				37.9	4975.85		647	45.6	109					429				0.38
[3988]	KAMCHATKA ARC	KAMCHATKA ARC / KAMCHATKA ARC / CENTRAL KAMCHATKA SEGMENT / KLYUCHEVSKOY	56.01	160.1	s_KL-9 [3988]	BASALT [3988]	55.0166	-158.796	50.84	0.83	14.19			8.61	9.74	11.11	0.16	0.57	2.29	0.14	1.06	69.9035	1.04332	1221.53	0.995995	1509.11	1.24527				3.125		7.2		41	4975.85		470	49	170	71			10	260
[3988]	KAMCHATKA ARC	KAMCHATKA ARC / KAMCHATKA ARC / CENTRAL KAMCHATKA SEGMENT / KLYUCHEVSKOY	56.01	160.1	s_KL-28 [3988]	BASALT [3988]	55.0166	-158.796	52.65	0.83	14.44			8.37	9.29	9.87	0.15	0.72	3.37	0.16	0.72	67.9752	1.73348	1208.31	0.982919	1400.66	1.16898				4.1875		11		37	4975.85		370	42	160	69			13	320
[3988]	KAMCHATKA ARC	KAMCHATKA ARC / KAMCHATKA ARC / CENTRAL KAMCHATKA SEGMENT / KLYUCHEVSKOY	56.01	160.1	s_KL-45 [3988]	BASALT [3988]	55.0166	-158.796	52.24	0.88	14.41			8.38	9.57	8.98	0.16	0.85	2.83	0.16	1.06	65.8572	1.46563	1212.33	0.936937	1393.85	1.12923				3.26316		9.4		39	5275.6		320	39	110	87			17	320
[3988]	KAMCHATKA ARC	KAMCHATKA ARC / KAMCHATKA ARC / CENTRAL KAMCHATKA SEGMENT / KLYUCHEVSKOY	56.01	160.1	s_KL-19 [3988]	BASALT [3988]	55.0166	-158.796	51.73	0.96	15.63			8.75	9.33	8.37	0.16	0.66	3.58	0.17	0.85	63.26	2.05929	1227.63	1.13599	1431.86	1.09009				2.78947		8		36	5755.2		310	43	96	91			9	300
[3988]	KAMCHATKA ARC	KAMCHATKA ARC / KAMCHATKA ARC / CENTRAL KAMCHATKA SEGMENT / KLYUCHEVSKOY	56.01	160.1	s_KL-15 [3988]	BASALT [3988]	55.0166	-158.796	51.8	0.88	15.8			9	9.3	8.2	0.16	0.6	3	0.14	0.99	62.1212	1.47273	1234.25	1.07832	1446.8	1.06213				3.05556		7		38	5275.6		270	37	96	63			18	320
[3988]	KAMCHATKA ARC	KAMCHATKA ARC / KAMCHATKA ARC / CENTRAL KAMCHATKA SEGMENT / KLYUCHEVSKOY	56.01	160.1	s_KL-40 [3988]	BASALT [3988]	55.0166	-158.796	52.42	0.95	15.22			8.54	9.08	7.83	0.16	0.88	3.54	0.18	1.26	62.2692	2.07393	1220.45	1.04878	1369.71	1.05897				3.35		10		38	5695.25		350	40	82	74			18	350
[7640][7321]	KAMCHATKA ARC	KAMCHATKA ARC / KAMCHATKA ARC / CENTRAL KAMCHATKA SEGMENT / SHIVELUCH (SHEVELUCH)	56.63	161.32	s_90099B/7 [7640]	BASALT [7640]	34.5018	-99.2289	51.46	0.77	13.77	2.69	5.69	8.11046	6.32	11.33	0.15	1.16	2.38	0.12	4.08	71.5467	1.48128	1200.61	0.826188	1253.69	1.14124				6.30769				24	4616.15		722	46						310				1.3
[3272][6549][1304]	KAMCHATKA ARC	KAMCHATKA ARC / KAMCHATKA ARC / CENTRAL KAMCHATKA SEGMENT / TOLBACHIK	55.53	160.27	s_T1475/1975 [3272] / s_T1475 [1304]	BASALT [3272]	46.5176	-118.504	50.85	0.93	13.5			8.95	11.63	9.85	0.18	0.84	2.36	0.2		66.4543	1.30446	1236.42	1.1088	1631.57	1.29557				5.03226				26.4	5575.35		119	32.5	60				54.2	461		204		1.7
[7640][7321]	KAMCHATKA ARC	KAMCHATKA ARC / KAMCHATKA ARC / CENTRAL KAMCHATKA SEGMENT / KHARCHINSKY	56.65	161.4	s_1006C [7640] / s_1006 [7321]	BASALT, OLIVINE-CLINOPYROXENE [7640] / BASALT [7321]	33.2484	-100.156	52.6	0.83	13.78	3.3	6.54	9.50934	8.9	9.52	0.14	1.3	2.44	0.22	0.16	64.3114	1.45704	1242.37	1.06504	1483.05	1.1766				2.9				38	4975.85		647	46	109					429				0.38
[7640]	KAMCHATKA ARC	KAMCHATKA ARC / KAMCHATKA ARC / CENTRAL KAMCHATKA SEGMENT / KLYUCHEVSKOY	56.05	160.63	s_85025C [7640]	BASALT, OLIVINE-CLINOPYROXENE-PLAGIOCLASE [7640]	49.2072	-124.087	52.96	0.95	14.61			8.92	9.26	9.27	0.2	0.75	2.93	0.15		65.1644	1.35968	1223.94	0.989685	1449.62	1.13315				2.55276				37	5695.25		520	43	113					320				0.45
[5033][3272][6549]	KAMCHATKA ARC	KAMCHATKA ARC / KAMCHATKA ARC / CENTRAL KAMCHATKA SEGMENT / KLYUCHEVSKOY	56.05	160.63	s_K77381 [5033]	BASALT [5033]	49.2072	-124.087	51.59	0.78	13.4			8.52	10.1	11.81	0.18	0.53	2.42	0.12	0.45	71.3883	1.0131	1214.88	0.950097	1538	1.30961				2.35294				33.3	4676.1			43.1	211				5.3	380		57		0.29
[19963]	KAMCHATKA ARC	KAMCHATKA ARC / KAMCHATKA ARC / CENTRAL KAMCHATKA SEGMENT / TOLBACHIK	55.7861	160.409	s_TOL-12-52 [19963]	BASALT [19963]	48.3247	-127.348	50.044	1.171	13.978			9.3	9.968	8.961	0.18	1.258	2.61	0.339		63.4287	2.124	1252.03	1.27164	1563.49	1.21577		0.535847	155.598	4.24839	1.64832				7020.15		27.9141		18.128	83.1099	97.3251		32.6318	450.275	29.4705	155.1	3.58411	0.587868
[19963]	KAMCHATKA ARC	KAMCHATKA ARC / KAMCHATKA ARC / CENTRAL KAMCHATKA SEGMENT / TOLBACHIK	55.7892	160.331	s_TOL-13-55 [19963]	BASALT [19963]	49.5799	-134.061	49.691	1.172	14.079			9.34	10.2	9.017	0.179	1.21	2.626	0.332		63.4737	2.19921	1255.26	1.31582	1589.02	1.22903									7026.14
[19963]	KAMCHATKA ARC	KAMCHATKA ARC / KAMCHATKA ARC / CENTRAL KAMCHATKA SEGMENT / TOLBACHIK	55.8639	160.277	s_TOL-13-34 [19963]	BASALT [19963]	50.7492	-138.569	51.432	0.996	15.328			8.89	9.6	7.591	0.183	1.052	2.758	0.219		60.5831	1.72155	1234.94	1.09305	1415.42	1.06255		0.598763	137.157	3.59476	1.87848				5971.02		199.167		58.4944	51.4226	93.2955		17.9171	374.645	18.96	85.8814	2.30386	0.257736
[19963]	KAMCHATKA ARC	KAMCHATKA ARC / KAMCHATKA ARC / CENTRAL KAMCHATKA SEGMENT / TOLBACHIK	55.6842	160.239	s_TOL-13-81 [19963]	BASALT [19963]	49.8102	-135.807	49.551	1.108	14.004			9.29	10.537	8.99	0.193	1.111	2.556	0.292		63.5286	2.05265	1254.7	1.29848	1610.8	1.23831									6642.46
[19963]	KAMCHATKA ARC	KAMCHATKA ARC / KAMCHATKA ARC / CENTRAL KAMCHATKA SEGMENT / TOLBACHIK	55.6799	160.248	s_TOL-13-82 [19963]	BASALT [19963]	49.8102	-135.807	50.101	0.957	13.398			9.28	11.706	9.661	0.204	0.817	2.329	0.203		65.2041	1.39379	1250.9	1.20915	1709.38	1.31264									5737.22
[19963]	KAMCHATKA ARC	KAMCHATKA ARC / KAMCHATKA ARC / CENTRAL KAMCHATKA SEGMENT / TOLBACHIK	55.7818	160.237	s_TOL-12-32 [19963]	BASALT [19963]	50.8907	-141.05	49.942	1.042	14.462			9.29	9.923	8.266	0.153	0.81	2.56	0.179		61.562	1.63597	1253.1	1.19417	1585.29	1.15202		0.62128	149.88	2.98906	1.77396				6246.79		337.873		83.9724	46.8572	73.65		13.4797	296.369	21.278	75.4203	1.8551	0.211995
[19963]	KAMCHATKA ARC	KAMCHATKA ARC / KAMCHATKA ARC / CENTRAL KAMCHATKA SEGMENT / TOLBACHIK	55.7823	160.229	s_TOL-12-33 [19963]	BASALT [19963]	50.8907	-141.05	50.172	1.034	14.414			9.19	9.93	8.333	0.151	0.815	2.566	0.179		62.0082	1.59386	1248.41	1.15998	1567.01	1.15152		0.584314	136.058	3.00574	1.76488				6198.83		326.371		80.5371	45.4315	73.1944		13.8528	296.259	21.3558	77.7519	2.04169	0.304764
[19963]	KAMCHATKA ARC	KAMCHATKA ARC / KAMCHATKA ARC / CENTRAL KAMCHATKA SEGMENT / TOLBACHIK	55.9031	160.377	s_TOL-13-01 [19963]	BASALT [19963]	49.4539	-131.486	51.614	0.947	13.57			9	10.429	8.894	0.196	0.877	2.396	0.194		64.0132	1.24362	1234.58	1.01521	1553.5	1.196									5677.26
[19963]	KAMCHATKA ARC	KAMCHATKA ARC / KAMCHATKA ARC / CENTRAL KAMCHATKA SEGMENT / TOLBACHIK	55.8998	160.359	s_TOL-13-05 [19963]	BASALT [19963]	49.4539	-131.486	51.642	0.947	13.531			8.94	10.434	8.924	0.184	0.864	2.39	0.192		64.2446	1.22524	1232.43	0.998505	1547.77	1.19636		0.568531	176.102	3.13341	1.89011				5677.26		257.076		66.9816	40.8358	84.0331		14.7341	343.701	17.3962	71.827	1.5412	0.316919
[19963]	KAMCHATKA ARC	KAMCHATKA ARC / KAMCHATKA ARC / CENTRAL KAMCHATKA SEGMENT / TOLBACHIK	55.8997	160.361	s_TOL-13-07 [19963]	BASALT [19963]	49.4539	-131.486	51.519	0.965	13.68			9.06	10.624	9.084	0.187	0.864	2.39	0.198		64.3464	1.24293	1236.42	1.04431	1571.62	1.21098		0.683285	182.982	3.09254	1.88635				5785.18		270.561		67.8889	50.4815	85.3872		14.9934	344.986	17.7117	73.8807	1.48731	0.380952
[19963]	KAMCHATKA ARC	KAMCHATKA ARC / KAMCHATKA ARC / CENTRAL KAMCHATKA SEGMENT / TOLBACHIK	55.896	160.366	s_TOL-13-11 [19963]	ANDESITE, BASALTIC [19963]	49.4539	-131.486	52.781	0.948	14.008			8.65	9.693	7.968	0.174	0.974	2.543	0.2		62.3789	1.26462	1221.05	0.895847	1416.41	1.09369		0.649455	152.842	3.31252	1.88729				5683.26		253.712		64.4858	49.4394	86.3947		15.47	363.267	17.3606	76.1244	1.85456	0.339958
[19963]	KAMCHATKA ARC	KAMCHATKA ARC / KAMCHATKA ARC / CENTRAL KAMCHATKA SEGMENT / TOLBACHIK	55.894	160.452	s_POV-10-03 [19963]	ANDESITE, BASALTIC [19963]	48.2044	-124.679	52.098	0.936	14.244			8.28	9.179	8.663	0.143	1.226	2.829	0.254		65.317	1.80732	1211.28	0.954877	1336.21	1.11347		0.736164	314.679	6.07126	1.86087				5611.32		383.604		85.4103	65.7827	69.5631		16.1699	468.197	19.397	89.3588	1.86563	0.432719
[4769]	KAMCHATKA ARC	KAMCHATKA ARC / KAMCHATKA ARC / CENTRAL KAMCHATKA SEGMENT	48	153	s_TB-7 [4769]	BASALT [4769]	40.4653	-83.2968	49.91	1.12	14.24	10.06		9.05199	10.46	9.97	0.17	1.17	2.66	0.32		66.4716	2.12285	1243.67	1.28945	1557.1	1.26781			123						6714.4				134				28	297	21	114	2
[4834]	KAMCHATKA ARC	KAMCHATKA ARC / KAMCHATKA ARC / CENTRAL KAMCHATKA SEGMENT / KLYUCHEVSKOY	56.05	160.63	s_1 [4834]	BASALT, CALC-ALKALINE [4834]	49.2072	-124.087	51.43	0.9	13.6			8.7	9.44	11.92	0.16	0.85	2.49	0.14		71.15	1.32332	1220.93	1.04031	1502.37	1.30181									5395.5
[4834]	KAMCHATKA ARC	KAMCHATKA ARC / KAMCHATKA ARC / CENTRAL KAMCHATKA SEGMENT / KLYUCHEVSKOY	56.05	160.63	s_2 [4834]	BASALT, CALC-ALKALINE [4834]	49.2072	-124.087	51.38	0.91	13.51			9.4	9.68	11.67	0.19	0.68	2.28	0.15		69.085	1.04554	1240.46	1.09643	1627.37	1.31184									5455.45
[4834]	KAMCHATKA ARC	KAMCHATKA ARC / KAMCHATKA ARC / CENTRAL KAMCHATKA SEGMENT / KLYUCHEVSKOY	56.05	160.63	s_3 [4834]	BASALT, CALC-ALKALINE [4834]	49.2072	-124.087	51.39	0.88	13.83			8.7	9.75	11.17	0.16	0.76	2.52	0.15		69.798	1.28229	1222.52	1.03137	1510.39	1.26794									5275.6
[4834]	KAMCHATKA ARC	KAMCHATKA ARC / KAMCHATKA ARC / CENTRAL KAMCHATKA SEGMENT / KLYUCHEVSKOY	56.01	160.1	s_4 [4834]	BASALT, CALC-ALKALINE [4834]	55.0166	-158.796	51.66	0.93	14.18			8.7	9.45	10.94	0.16	0.74	2.39	0.14		69.3576	1.13128	1220.84	0.98896	1478.41	1.22572									5575.35
[4834]	KAMCHATKA ARC	KAMCHATKA ARC / KAMCHATKA ARC / CENTRAL KAMCHATKA SEGMENT / KLYUCHEVSKOY	56.2104	160.814	s_5 [4834]	BASALT, CALC-ALKALINE [4834]	46.7321	-113.085	52.7	0.74	14.88			8.3	9.7	8.71	0.18	0.97	2.55	0.19		65.3849	1.27736	1207.58	0.883386	1334.31	1.09172									4436.3
[20502]	KAMCHATKA ARC	KAMCHATKA ARC / KAMCHATKA ARC / CENTRAL KAMCHATKA SEGMENT / TOLBACHIK	55.53	160.27	s_1417 [20502]	ANDESITE, BASALTIC [20502]	46.5176	-118.504	52.24	1.08	15.14			8.98	8.35	8.62	0.15	1.5	2.97	0.32	-0.25	63.341	2.16244	1230.7	1.11899	1340.91	1.08344									6474.6
[20502]	KAMCHATKA ARC	KAMCHATKA ARC / KAMCHATKA ARC / CENTRAL KAMCHATKA SEGMENT / TOLBACHIK	55.53	160.27	s_1418.V [20502]	BASALT [20502]	46.5176	-118.504	51	1.11	14.6			9.14	8.86	9.19	0.16	1.49	2.94	0.31	-0.3	64.4109	2.45311	1240.84	1.24026	1429.51	1.16415									6654.45
[21486][19963]	KAMCHATKA ARC	KAMCHATKA ARC / KAMCHATKA ARC / CENTRAL KAMCHATKA SEGMENT / TOLBACHIK	55.787	160.306	s_TOL-12-29 [21486]	BASALT [21486]	49.5799	-134.061	50.53	1.27	14.6			9.87	10.05	8.89	0.18	1.39	2.8	0.38		61.8506	2.33149	1268.19	1.43014	1601.32	1.2132		1.34525	51.1782	4.65648	1.86096				7613.65		745.428		231.428	280.906	72.0755		41.5159		28.425	208.814	4.92723	1.16015
[21190]	KAMCHATKA ARC	KAMCHATKA ARC / KAMCHATKA ARC / CENTRAL KAMCHATKA SEGMENT / TOLBACHIK	55.7	160.23	s_1-15 [21190]	BASALT [21190]	49.8102	-135.807	50.16	1.07	14.25			9.21	10.49	10.02	0.17	1.09	2.54	0.27	-0.27	66.1969	1.84035	1246.21	1.26759	1579.31	1.26584									6414.65
[21190]	KAMCHATKA ARC	KAMCHATKA ARC / KAMCHATKA ARC / CENTRAL KAMCHATKA SEGMENT / TOLBACHIK	55.79	160.33	s_4A-15 [21190]	BASALT [21190]	49.5799	-134.061	50.46	1.36	15.38			9.49	9.32	8.09	0.17	1.5	2.93	0.41	-0.44	60.5438	2.63068	1257.82	1.37354	1476.73	1.12011									8153.2
[21477]	KAMCHATKA ARC	KAMCHATKA ARC / KAMCHATKA ARC / CENTRAL KAMCHATKA SEGMENT / BEZYMIANNY	55.99	160.6	s_VK12/22D [21477]	NOT GIVEN [21477]	48.0488	-121.236	50.28	1.53	15.19			10.35	9.88	9.15	0.17	0.81	2.5	0.05		61.4094	1.50496	1280.29	1.43116	1721.3	1.19468		1.48438							9172.35	311	198	43	46	95	75		10	270	45	64
[2725]	KAMCHATKA ARC	KAMCHATKA ARC / KAMCHATKA ARC / CENTRAL KAMCHATKA SEGMENT / TOLBACHIK	55.82	160.37	s_31/3 [2725]	BASALT [2725]	48.3247	-127.348	50.02	1.1	13.5	4.43	5.99	9.97611	12.04	9.26	0.17	0.64	2.39	0.4		62.5579	1.30782	1274.21	1.34675	1860.66	1.32163									6594.5
[2725]	KAMCHATKA ARC	KAMCHATKA ARC / KAMCHATKA ARC / CENTRAL KAMCHATKA SEGMENT / TOLBACHIK	55.82	160.37	s_31/2 [2725]	BASALT [2725]	48.3247	-127.348	49.74	1.1	13.7	4.34	5.76	9.66513	12.16	9.18	0.17	0.84	2.49	0.39		63.0949	1.64524	1267.61	1.3678	1789.29	1.31793									6594.5
[2725]	KAMCHATKA ARC	KAMCHATKA ARC / KAMCHATKA ARC / CENTRAL KAMCHATKA SEGMENT / TOLBACHIK	55.82	160.37	s_31/1 [2725]	BASALT [2725]	48.3247	-127.348	49.7	1.1	13.7	4.42	5.96	9.93712	12.16	9.3	0.18	0.84	2.49	0.38		62.7504	1.65506	1275.56	1.42916	1830.55	1.33256									6594.5
[2725]	KAMCHATKA ARC	KAMCHATKA ARC / KAMCHATKA ARC / CENTRAL KAMCHATKA SEGMENT / TOLBACHIK	55.82	160.37	s_925-YUK [2725]	BASALT [2725]	48.3247	-127.348	49.5	1.01	13.18	3.18	6.85	9.71136	12.34	9.98	0.18	0.93	2.18	0.25		64.9097	1.48802	1268.5	1.36183	1819.53	1.38078									6054.95
[2725]	KAMCHATKA ARC	KAMCHATKA ARC / KAMCHATKA ARC / CENTRAL KAMCHATKA SEGMENT / TOLBACHIK	55.82	160.37	s_27 [2725]	BASALT [2725]	48.3247	-127.348	49.74	1	13.72	6.04	4.76	10.1948	11.44	9.62	0.33	0.88	2.28	0.18		62.9426	1.48154	1281.83	1.44067	1818.19	1.32164									5995
[2725]	KAMCHATKA ARC	KAMCHATKA ARC / KAMCHATKA ARC / CENTRAL KAMCHATKA SEGMENT / TOLBACHIK	55.82	160.37	s_21A [2725]	BASALT [2725]	48.3247	-127.348	52.42	0.98	15.88	4.12	5.02	8.72718	7.71	7.68	0.31	1.2	3.21	0.16		61.3006	2.06455	1223.91	1.04288	1276.57	0.987498									5875.1
[2725]	KAMCHATKA ARC	KAMCHATKA ARC / KAMCHATKA ARC / CENTRAL KAMCHATKA SEGMENT / TOLBACHIK	55.82	160.37	s_21 [2725]	BASALT [2725]	48.3247	-127.348	52.02	0.98	15.89	4.07	5.11	8.77219	8.08	7.47	0.3	1.2	3.34	0.11		60.518	2.2851	1229.31	1.10851	1305.61	0.999516									5875.1
[2725]	KAMCHATKA ARC	KAMCHATKA ARC / KAMCHATKA ARC / CENTRAL KAMCHATKA SEGMENT / TOLBACHIK	55.82	160.37	s_30 [2725]	BASALT [2725]	48.3247	-127.348	50.24	1.1	13.25	3.16	6.66	9.50337	12.04	9.83	0.17	0.84	2.49	0.35		65.0578	1.53162	1257.85	1.28983	1771.11	1.34978									6594.5
[2725]	KAMCHATKA ARC	KAMCHATKA ARC / KAMCHATKA ARC / CENTRAL KAMCHATKA SEGMENT / TOLBACHIK	55.82	160.37	s_25 [2725]	BASALT [2725]	48.3247	-127.348	49.42	1	14.21	6.44	4.31	10.1047	11.28	9.86	0.24	0.88	2.28	0.12		63.7209	1.55539	1278.99	1.45701	1781.23	1.3118									5995
[2725]	KAMCHATKA ARC	KAMCHATKA ARC / KAMCHATKA ARC / CENTRAL KAMCHATKA SEGMENT / TOLBACHIK	55.82	160.37	s_29 [2725]	BASALT [2725]	48.3247	-127.348	49.58	1	14.22	5.99	4.36	9.7498	11.28	9.86	0.3	0.84	2.6	0.12		64.5433	1.79842	1267.58	1.42309	1733.14	1.30826									5995
[2725]	KAMCHATKA ARC	KAMCHATKA ARC / KAMCHATKA ARC / CENTRAL KAMCHATKA SEGMENT / TOLBACHIK	55.82	160.37	s_919-YUK [2725]	BASALT [2725]	48.3247	-127.348	49.36	0.95	13.3	3.79	6.33	9.74024	12.4	9.75	0.15	1.04	2.34	0.28		64.3087	1.79629	1271.15	1.42048	1806.62	1.37788									5695.25
[2725]	KAMCHATKA ARC	KAMCHATKA ARC / KAMCHATKA ARC / CENTRAL KAMCHATKA SEGMENT / TOLBACHIK	55.82	160.37	s_918-YUK [2725]	BASALT [2725]	48.3247	-127.348	50.04	0.83	13.58	7.02	2.89	9.2066	11.06	10.56	0.18	1.02	2.49	0.16		67.3694	1.75001	1247.24	1.26457	1638.08	1.33502									4975.85
[2725]	KAMCHATKA ARC	KAMCHATKA ARC / KAMCHATKA ARC / CENTRAL KAMCHATKA SEGMENT / TOLBACHIK	55.82	160.37	s_926-YUK [2725]	BASALT [2725]	48.3247	-127.348	49.52	1.02	13.18	2.87	7.08	9.66243	12.22	9.99	0.17	0.96	2.39	0.21		65.0475	1.72124	1267.69	1.3905	1806.2	1.38292									6114.9
[3317]	KAMCHATKA ARC	KAMCHATKA ARC / KAMCHATKA ARC / SOUTHERN KAMCHATKA SEGMENT / GORELY	52.45	158.12	s_1 [3317]	BASALT [3317]	29.7337	-83.535	49.35	1.06	15.88	2.59	7.27	9.60048	8.78	10.32	0.17	0.99	2.7	0.27		65.9273	2.14427	1258.34	1.40719	1523.73	1.18793									6354.7
[3317]	KAMCHATKA ARC	KAMCHATKA ARC / KAMCHATKA ARC / CENTRAL KAMCHATKA SEGMENT / AVACHA (AVACHINSKY)	53.256	158.836	s_2 [3317]	BASALT [3317]	33.5004	-87.138	51.05	0.76	16.91	2.29	6.32	8.38054	9.76	9.28	0.18	0.58	1.85			66.5908	0.733528	1211.64	0.916064	1331.52	1.0482									4556.2
[3317]	KAMCHATKA ARC	KAMCHATKA ARC / KAMCHATKA ARC / CENTRAL KAMCHATKA SEGMENT / KORYAKSKY(KORIAKSKY)	53.28	158.9	s_3 [3317]	BASALT [3317]	32.858	-83.4855	50.58	1.03	16.1	3.56	5.67	8.87329	8.67	9.34	0.17	0.74	2.71	0.14		65.4538	1.57025	1230.89	1.1228	1408.27	1.08903									6174.85
[3317]	KAMCHATKA ARC	KAMCHATKA ARC / KAMCHATKA ARC / CENTRAL KAMCHATKA SEGMENT	55	158	s_4 [3317]	BASALT [3317]	66.2801	-273.336	49.43	1.16	13.98	5.5	3.56	8.5089	10.91	10.45	0.25	0.87	2.46	0.41		68.8534	1.72456	1227.89	1.16891	1557.02	1.29503									6954.2
[3317]	KAMCHATKA ARC	KAMCHATKA ARC / KAMCHATKA ARC / CENTRAL KAMCHATKA SEGMENT / KHARCHINSKY	56.65	161.4	s_5 [3317]	BASALT [3317]	33.2484	-100.156	49.92	0.96	14.17	4.27	5.13	8.97215	10.27	9.6	0.17	1.04	2.87	0.26		65.8232	2.20926	1241.59	1.25889	1549.65	1.24612									5755.2
[3317]	KAMCHATKA ARC	KAMCHATKA ARC / KAMCHATKA ARC / CENTRAL KAMCHATKA SEGMENT	55	158	s_6 [3317]	BASALT [3317]	66.2801	-273.336	49.69	1.05	14.08	4.83	4.42	8.76603	10.56	9.99	0.21	0.96	2.68	0.33		67.2274	1.98051	1235.32	1.21783	1553.58	1.26855									6294.75
[3317]	KAMCHATKA ARC	KAMCHATKA ARC / KAMCHATKA ARC / CENTRAL KAMCHATKA SEGMENT / TOLBACHIK	55.53	160.27	s_1 [3317]	BASALT [3317]	46.5176	-118.504	49.76	1.02	13.48	3.06	6.99	9.74339	11.6	9.88	0.16	1.03	2.44	0.25		64.6047	1.7812	1267.46	1.3876	1756.43	1.34474		2.07143	122.222			9.8	0.67		6114.9	250	265	42	120	145	75	12	11.6	315	24	70	2.7
[22526]	KAMCHATKA ARC	KAMCHATKA ARC / KAMCHATKA ARC / CENTRAL KAMCHATKA SEGMENT / ASACHA	52.458	157.986	s_N163-G [22526]	BASALT [22526]	30.7053	-86.8757	50.78	1	16.85			8.71	9.56	7.77	0.17	0.84	2.99	0.28		61.6232	1.88546	1231.28	1.16538	1373.18	1.02796			63.8						5995	249	386	40	109		76	13	13	474	24	93	5
[22526]	KAMCHATKA ARC	KAMCHATKA ARC / KAMCHATKA ARC / CENTRAL KAMCHATKA SEGMENT / KARCHINSKY	56.4333	160.842	s_7403-1 [22526]	BASALT [22526]	48.7691	-118.434	52.7	0.9	15.32			8.26016	9.63	7.27	0.16	1.3	3.16	0.22		61.3038	2.05068	1212.99	0.999692	1290.14	1.03527									5395.5	255	236	37	37		73	19	24	436	20.1832	80	0
[22526]	KAMCHATKA ARC	KAMCHATKA ARC / KAMCHATKA ARC / CENTRAL KAMCHATKA SEGMENT / KARCHINSKY	56.5486	160.873	s_K2-83 A [22526]	BASALT [22526]	47.3204	-115.269	50.19	0.91	14.12			9.4569	10.03	9.87	0.17	1.04	2.9	0.22		65.2612	2.15905	1254.78	1.33367	1605.2	1.26339									5455.45	284	509	49	140		83	19	22	375	21.9564	71	0
[22526]	KAMCHATKA ARC	KAMCHATKA ARC / KAMCHATKA ARC / CENTRAL KAMCHATKA SEGMENT / KARCHINSKY	56.5288	160.869	s_K2-85 [22526]	BASALT [22526]	47.3204	-115.269	50.22	0.89	13.84			9.24994	9.94	11.06	0.17	1.03	2.8	0.22		68.2764	2.0317	1245.58	1.29543	1589.46	1.31832									5335.55	263	664	51	166		73	19	21	400	19.843	73	0
[22526]	KAMCHATKA ARC	KAMCHATKA ARC / KAMCHATKA ARC / CENTRAL KAMCHATKA SEGMENT / KARCHINSKY	56.4197	160.859	s_7401 [22526]	BASALT [22526]	46.1891	-111.929	50.01	0.98	14.78			8.98	9.87	9.08	0.16	1.21	3.23	0.28		64.5396	2.81221	1243.32	1.33253	1491.65	1.19996									5875.1	285	453	45	116		83	19	22	517	22.9564	77	0
[22526]	KAMCHATKA ARC	KAMCHATKA ARC / KAMCHATKA ARC / CENTRAL KAMCHATKA SEGMENT / KARCHINSKY	56.4498	160.803	s_7424-1 [22526]	BASALT [22526]	48.7691	-118.434	50.85	0.86	13.73			8.5481	9.97	9.17	0.16	0.8	2.95	0.2		65.8814	1.7914	1224.48	1.05254	1498.44	1.20082									5155.7	263	387	43	79		76	18	22	410	18.9564	72	0
[22526]	KAMCHATKA ARC	KAMCHATKA ARC / KAMCHATKA ARC / CENTRAL KAMCHATKA SEGMENT / ZARECHNY	56.3576	160.787	s_K2-94 [22526]	BASALT [22526]	48.7691	-118.434	51.96	1.03	14.51			9.04299	9.97	8.18	0.17	1.15	3.16	0.25		61.9515	2.07323	1237.69	1.16285	1477.89	1.14239									6174.85	291	302	40	54		82	19	22	485	23.9564	86	0
[22526]	KAMCHATKA ARC	KAMCHATKA ARC / KAMCHATKA ARC / CENTRAL KAMCHATKA SEGMENT / ZARECHNY	56.3547	160.789	s_K2-96B [22526]	BASALT [22526]	48.7691	-118.434	52.19	0.84	14.5			8.48511	9.05	9.28	0.16	1.21	3.02	0.22		66.3144	1.947	1215.51	1.02533	1353.04	1.13985									5035.8	242	566	41	118		76	17	23	399	22.0698	79	0
[22526]	KAMCHATKA ARC	KAMCHATKA ARC / KAMCHATKA ARC / CENTRAL KAMCHATKA SEGMENT / AVACHA (AVACHINSKY)	53.3	158.8	s_29215 [22526]	BASALT [22526]	33.5004	-87.138	50.94	1.01	15.98	1.23	7.47	8.57675	10.04	9.02	0.09	0.7	2.6	0.17		65.4341	1.37154	1221.96	1.06128	1420	1.10843									6054.95
[23079]	KAMCHATKA ARC	KAMCHATKA ARC / KAMCHATKA ARC / CENTRAL KAMCHATKA SEGMENT / UKSICHAN	55.9489	158.437	s_ES-762 [23079]	BASALT [23079]			50.41	0.87	15.93	4.03	5.48	9.10619	10	9.07	0.17	0.96	2.46	0.22	0.04	64.1942	1.57846	1240.87	1.20274	1463.98	1.13306			189.117	4.33871	1.86022				5215.65								24.67	532.81	17.65	89.33	1.8	0.85
[23079]	KAMCHATKA ARC	KAMCHATKA ARC / KAMCHATKA ARC / CENTRAL KAMCHATKA SEGMENT / UKSICHAN	55.9739	158.506	s_ES-976 [23079]	BASALT [23079]			50.95	0.88	16.57	2.09	7.17	9.05058	9.69	7.78	0.16	1.02	2.61	0.23	0.34	60.7428	1.65747	1240.19	1.16999	1397.54	1.04044			209.514	5.23026	1.96711				5275.6								22.03	567.55	16.35	67.05	1.83	0.54
[20395]	KAMCHATKA ARC	KAMCHATKA ARC / KAMCHATKA ARC / SOUTHERN KAMCHATKA SEGMENT / GORELY	52.45	158.12	s_OG-160 [20395]	BASALT [20395]	29.7337	-83.535	50.4525	1.06	15.7125			9.3	9.025	9.54	0.175	0.9425	2.7925	0.2875		64.8685	1.87189	1245.6	1.25926	1480.23	1.14412		0.548993							6354.7	251.675	378.275		168.775	59.95	76.675		10.95	434.525		109.2
[6818]	KAMCHATKA ARC	KAMCHATKA ARC / KAMCHATKA ARC / CENTRAL KAMCHATKA SEGMENT / TOLBACHIK	55.82	160.37	s_TOL-2 [6818]	NOT GIVEN [6818]	48.3247	-127.348	50.85	0.914	13.62	2.46	6.64	8.85351	11.6	9.67	0.174	0.88	2.37	0.221	0.27	66.2846	1.34554	1233.83	1.09666	1603.95	1.27974									5479.43
[7862]	KAMCHATKA ARC	KAMCHATKA ARC / KAMCHATKA ARC / CENTRAL KAMCHATKA SEGMENT / ZARECHNY	57.2	159.2	s_K01/22 [7862]	ADAKITE [7862]			52.6	0.87	12.58			8.38	8.62	11.05	0.16	1.31	2.78	0.27		70.3573	1.74251	1209.11	0.934917	1392.18	1.26013									5215.65
[24736]	KAMCHATKA ARC	KAMCHATKA ARC / KAMCHATKA ARC / CENTRAL KAMCHATKA SEGMENT / KLYUCHEVSKOY	56.118	160.742	s_KLU-16-02 [24736]	NOT GIVEN [24736]	47.636	-117.247	52.97	0.87	16.25			8.44	9.62	8.04	0.17	0.7	3.04	0.16		63.1634	1.40297	1212.83	0.96246	1334.27	1.02769									5215.65
[24736]	KAMCHATKA ARC	KAMCHATKA ARC / KAMCHATKA ARC / CENTRAL KAMCHATKA SEGMENT / KLYUCHEVSKOY	56.118	160.742	s_KLU-16-10 [24736]	NOT GIVEN [24736]	47.636	-117.247	52.2	0.89	16.1			8.76	9.3	7.91	0.17	0.68	2.97	0.16		61.9097	1.4481	1225.68	1.02493	1383.7	1.02965									5335.55
[6818][20507]	KAMCHATKA ARC	KAMCHATKA ARC / KAMCHATKA ARC / SOUTHERN KAMCHATKA SEGMENT / PAUZHETKA	51	157	s_97KAM-29DB [6818] / s_97KAM29DB [20507]	NOT GIVEN [6818] / BASALT [20507]	32.3552	-60.9058	51.95	0.84	17.99	9.84	0.18	9.03403	2.52	9.88	5.02	0.11	0.45		0.16	66.3136	0.0350391	1218.36	0.696687	1064.66	0.759659									5035.8
[11661]	KAMCHATKA ARC	KAMCHATKA ARC / KAMCHATKA ARC / SOUTHERN KAMCHATKA SEGMENT / TARKHOV FORMATION	56.05	163.07	s_2 [11661]	BASALT [11661]			52.18	0.51	13.11			8.95	9.16	9.93	0.22	1.68	1.27	0.08	2.89	66.6344	0.947985	1225.83	0.863213	1376.47	1.18684									3057.45
[11661]	KAMCHATKA ARC	KAMCHATKA ARC / KAMCHATKA ARC / SOUTHERN KAMCHATKA SEGMENT / TARKHOV FORMATION	56.05	163.07	s_KM64B [11661]	BASALT [11661]			49.99	0.42	14.38			8.63	8.35	9.6	0.17	1.32	2.89	0.08	3.2	66.6924	2.53564	1228.57	1.14446	1359.74	1.16319									2517.9
[11662]	KAMCHATKA ARC	KAMCHATKA ARC / KAMCHATKA ARC / EASTERN KAMCHATKA SEGMENT / KUMROCH-SHISH	55	160	s_K83140 [11662]	NOT GIVEN [11662]	44.2635	-106.852	48.62	0.9	16.27			8.49	11.32	8.09	0.17	0.26	3	0.1	2.44	63.1702	1.89103	1236.03	1.2389	1547.27	1.12845		2.12308	131.613	2.70248	1.57851		0.69		5395.5	420	10	35	6	138	135	19	6	390	27	65	3.1	1.25
[11662]	KAMCHATKA ARC	KAMCHATKA ARC / KAMCHATKA ARC / EASTERN KAMCHATKA SEGMENT	53	159	s_V0356 [11662]	NOT GIVEN [11662]	29.7537	-69.497	49	0.64	13.78			9.49	9.99	9.81	0.17	2.07	2.07	0.23	2.75	65.0435	2.8566	1262.98	1.42654	1496.04	1.2855									3836.8
[12332]	KAMCHATKA ARC	KAMCHATKA ARC / KAMCHATKA BACK ARC / SREDINNY RIDGE / KHANGAR	54.5	157	s_ES762 [12332]	BASALT [12332]	62.9149	-304.268	50.41	0.87	15.93			9.07	10	9.07	0.17	0.96	2.46	0.22	0.04	64.2857	1.57846	1240	1.19749	1459.62	1.13204			181.905	4.10526	1.84211				5215.65								27	544	18	61	2.1	0.85
[10416]	KAMCHATKA ARC	KAMCHATKA ARC / KAMCHATKA ARC / CENTRAL KAMCHATKA SEGMENT	58.5	157	s_9685 [10416]	SHOSHONITE [10416]			48.63	1.03	14.03	4.92	5.11	9.53702	8.1	11.12	0.28	1.61	2.72	0.32	2.03	67.7291	3.33018	1261.84	1.49003	1513.12	1.29149				16.1538					6174.85		226		68				25	215	34	195
[14905]	KAMCHATKA ARC	KAMCHATKA ARC / KAMCHATKA(KOMANDORSKY) BASIN	55.58	167.24	s_2316-5 [14905]	BASALT [14905]			50.1162	1.48891	17.4657			8.41735	9.69377	8.33157	0.116156	1.26716	2.85111	0.253432		64.0502	2.38333	1223.7	1.24846	1308.69	1.04596									8926.03
[3272]	KAMCHATKA ARC	KAMCHATKA ARC / KAMCHATKA ARC / CENTRAL KAMCHATKA SEGMENT / TOLBACHIK	55.53	160.27	s_P18-5/82 [3272]	BASALT [3272]	46.5176	-118.504	50.7	1.1	14.7			9.7	10.4	8.48	0.19	0.82	2.48	0.21		61.144	1.41429	1261.19	1.24485	1637.14	1.17123									6594.5
[3272]	KAMCHATKA ARC	KAMCHATKA ARC / KAMCHATKA ARC / CENTRAL KAMCHATKA SEGMENT / TOLBACHIK	55.53	160.27	s_PT19-1/82 [3272]	BASALT [3272]	46.5176	-118.504	51.85	0.92	13.26			8.94	10.43	9.67	0.19	0.94	2.31	0.19		66.067	1.1935	1229.68	0.991676	1548.12	1.23771									5515.4
[3272]	KAMCHATKA ARC	KAMCHATKA ARC / KAMCHATKA ARC / CENTRAL KAMCHATKA SEGMENT / TOLBACHIK	55.53	160.27	s_PT22-4/82 [3272]	BASALT [3272]	46.5176	-118.504	52.15	0.95	15.15			8.65	9.78	8.27	0.17	1.02	2.57	0.21	0.25	63.2478	1.40854	1221.97	0.989671	1385.5	1.08428									5695.25
[3272]	KAMCHATKA ARC	KAMCHATKA ARC / KAMCHATKA ARC / CENTRAL KAMCHATKA SEGMENT / TOLBACHIK	55.53	160.27	s_TB2607/1975 [3272]	BASALT [3272]	46.5176	-118.504	50.65	0.92	13.81			8.96	11.32	9.63	0.17	0.83	2.3	0.2		65.9238	1.28064	1237.17	1.10542	1607.26	1.26347									5515.4
[3272]	KAMCHATKA ARC	KAMCHATKA ARC / KAMCHATKA ARC / SOUTHERN KAMCHATKA SEGMENT / GORELY	52.45	158.12	s_K80100 [3272]	BASALT [3272]	29.7337	-83.535	49.17	0.97	14.85			9.84	8.83	11.9	0.19	0.76	2.54	0.26	0.06	68.5221	1.76499	1264.59	1.4252	1641.06	1.30095									5815.15
[15307]	KAMCHATKA ARC	KAMCHATKA ARC / KAMCHATKA ARC / CENTRAL KAMCHATKA SEGMENT / SHIVELUCH (SHEVELUCH)	56.63	161.32	s_X2 [15307]	ANDESITE [15307]	34.5018	-99.2289	48.11	0.48	9.31	5.86	7.32	12.5928	10.38	14.73	0.22	1.36	1.21	0.28	0.76	67.7989	1.29254	1369.3	2.04637	2370.78	1.8216									2877.6
[15404]	KAMCHATKA ARC	KAMCHATKA ARC / KAMCHATKA ARC / CENTRAL KAMCHATKA SEGMENT / KHARCHINSKY	56.4391	160.8	s_KH98-L4 [15404]	BASALT [15404]	48.7691	-118.434	50.15	0.89	13.97			9.65	9.92	11.55	0.18	1.03	2.63	0.21	0.53	68.2983	1.87351	1257.34	1.37322	1641.56	1.34393									5335.55
[15433]	KAMCHATKA ARC	KAMCHATKA ARC / KAMCHATKA ARC / CENTRAL KAMCHATKA SEGMENT / STUDENAYA	56.6135	161.252	s_7550-1 [15433]	ANDESITE, OLIVINE-CLINOPYROXENE-HORNBLENDE [15433]	34.5018	-99.2289	51.08	0.81	12.77			8.31	8.39	11.82	0.16	1.9	2.58	0.36		71.9124	2.48396	1213.16	1.09031	1335.21	1.31022									4855.95	226	772	42	212		71	16	45	471	22	84
[15433]	KAMCHATKA ARC	KAMCHATKA ARC / KAMCHATKA ARC / CENTRAL KAMCHATKA SEGMENT / STUDENAYA	56.523	161.406	s_K1-18B [15433]	BASALT, OLIVINE-CLINOPYROXENE-HORNBLENDE [15433]	28.431	-92.4852	50.55	0.84	13.49			8.13	8.64	10.33	0.16	1.93	2.53	0.41		69.5779	2.63465	1212.3	1.08075	1288.55	1.22186									5035.8	229	669	37	148		64	13	44	485	21	93
[13270]	KAMCHATKA ARC	KAMCHATKA ARC / KAMCHATKA ARC / CENTRAL KAMCHATKA SEGMENT	63	167	s_1153-14 [13270]	BASALT [13270]			47.81	1.81	17.32			8.36	9.44	7.69	0.15	0.2	2.88	0.22	3.25	62.3457	1.97222	1232.12	1.2207	1461.62	1.01312			63.3333	2.2069					10851	175	55	30	85				2	270	39	140	3
[13270]	KAMCHATKA ARC	KAMCHATKA ARC / KAMCHATKA ARC / CENTRAL KAMCHATKA SEGMENT	63	167	s_1270-12 [13270]	BASALT [13270]			47.13	1.78	16.74			8.95	8.15	7.6	0.15	0.24	2.53	0.19	5.21	60.4507	1.85785	1253.13	1.24646	1518.26	0.994087			44	2.75					10671.1	150	60	20	85				10	220	42	145	3
[10019]	KAMCHATKA ARC	KAMCHATKA ARC / KAMCHATKA ARC / CENTRAL KAMCHATKA SEGMENT / BAKENING	53.93	158.07	s_200338/1 [10019]	BASALT [10019]	46.8831	-150.955	49.73	1.2	16.83			8.91	9.58	8.61	0.16	0.88	3.23	0.24		63.4956	2.50997	1240.58	1.34204	1434.68	1.09489									7194
[10019]	KAMCHATKA ARC	KAMCHATKA ARC / KAMCHATKA ARC / CENTRAL KAMCHATKA SEGMENT / KLYUCHEVSKOY	56.05	160.63	s_KHUB-5 [10019]	BASALT [10019]	49.2072	-124.087	51.43	0.9	13.6			8.67	9.44	11.92	0.16	0.85	2.49	0.14		71.2209	1.32332	1220.08	1.03548	1498.31	1.30094									5395.5
[10019]	KAMCHATKA ARC	KAMCHATKA ARC / KAMCHATKA ARC / CENTRAL KAMCHATKA SEGMENT / KLYUCHEVSKOY	56.05	160.63	s_KHUB-2 [10019]	BASALT [10019]	49.2072	-124.087	51.39	0.88	13.83			8.73	9.75	11.17	0.16	0.76	2.52	0.15		69.7253	1.28229	1223.38	1.03622	1514.48	1.26881									5275.6
[2197]	KAMCHATKA ARC	KAMCHATKA ARC / KAMCHATKA BACK ARC / SREDINNY RIDGE	59.5	163.5	s_175 [2197]	NOT GIVEN [2197]			48.66	1.34	17.32			8.77	8.75	7.93	0.13	0.86	3.25	0.34		61.9424	2.98447	1242.47	1.35932	1390.19	1.02763				7.05882					8033.3								7	486	32	151	13
[15882]	KAMCHATKA ARC	KAMCHATKA ARC / KAMCHATKA ARC / CENTRAL KAMCHATKA SEGMENT / SHISHEISKY COMPLEX	57.3811	161.179	s_203/4 [15882]	NOT GIVEN [15882]			50.49	1.34	15.12	2.48	6.84	9.0715	7.95	9.34	0.16	1	4	0.24	0.71	64.9526	3.33778	1241.15	1.34945	1460.57	1.15061									8033.3
[15882]	KAMCHATKA ARC	KAMCHATKA ARC / KAMCHATKA ARC / CENTRAL KAMCHATKA SEGMENT / SHISHEISKY COMPLEX	57.3811	161.179	s_7199 [15882]	NOT GIVEN [15882]			52.36	0.69	15.92	1.98	5.29	7.0716	8.28	9.42	0.13	1.18	4.1	0.11	0.42	70.5688	2.97846	1175.47	0.97907	1127.16	1.06685									4136.55
[15882]	KAMCHATKA ARC	KAMCHATKA ARC / KAMCHATKA ARC / CENTRAL KAMCHATKA SEGMENT / SHISHEISKY COMPLEX	57.3811	161.179	s_G-206 [15882]	NOT GIVEN [15882]			49.96	0.85	14.9			8.46	9.92	10.62	0.16	0.78	2.59	0.22		69.3211	1.63174	1223.12	1.12716	1462.76	1.2262			47.75						5095.75	237	759	46	136		71	14	12	356	18	77	4
[15882]	KAMCHATKA ARC	KAMCHATKA ARC / KAMCHATKA ARC / CENTRAL KAMCHATKA SEGMENT / SHISHEISKY COMPLEX	57.3811	161.179	s_G-202 [15882]	NOT GIVEN [15882]			52.57	0.79	16.75			6.49	8.17	8.62	0.12	1.01	3.6	0.18		70.508	2.2207	1157.02	0.801309	1030.82	0.96576			94.75						4736.05	163	429	30	175		58	21	20	455	16	93	4
[15882]	KAMCHATKA ARC	KAMCHATKA ARC / KAMCHATKA ARC / CENTRAL KAMCHATKA SEGMENT / SHISHEISKY COMPLEX	57.3811	161.179	s_G-1305 [15882]	NOT GIVEN [15882]			51.74	0.72	14.37			7.5	7.89	10.46	0.14	1.04	2.95	0.47		71.5132	1.82152	1185.41	0.850622	1220.24	1.13029			48.2857						4316.4	185	889	37	182		67	15	23	390	15	81	7
[15882]	KAMCHATKA ARC	KAMCHATKA ARC / KAMCHATKA ARC / CENTRAL KAMCHATKA SEGMENT / SHISHEISKY COMPLEX	57.3811	161.179	s_G?286 [15882]	NOT GIVEN [15882]			52.82	0.72	14.68			7.44	8.23	9.77	0.14	1.09	3.01	0.19		70.2709	1.71181	1180.71	0.804436	1187.36	1.08829			93.5						4316.4	184	772	36	146		71	18	23	414	15	80	4
[15882]	KAMCHATKA ARC	KAMCHATKA ARC / KAMCHATKA ARC / CENTRAL KAMCHATKA SEGMENT / SHISHEISKY COMPLEX	57.3811	161.179	s_K2-109 [15882]	NOT GIVEN [15882]			52.94	0.79	16.67			6.48	8.27	8.76	0.12	1.03	3.64	0.17		70.8738	2.19405	1155.25	0.793529	1030.79	0.975504			120						4736.05	173	457	29	169		58	16	19	465	16	92	3
[15685]	KAMCHATKA ARC	KAMCHATKA ARC / KAMCHATKA ARC / CENTRAL KAMCHATKA SEGMENT / KLYUCHEVSKOY	56.05	160.63	s_1 [15685]	BASALT [15685]	49.2072	-124.087	51.51	0.57	14.91	3.02	6.26	8.9774	10.8	9.37	0.2	0.63	2.15			65.2623	0.908155	1231.33	1.00328	1519.47	1.17243									3417.15
[15685]	KAMCHATKA ARC	KAMCHATKA ARC / KAMCHATKA ARC / CENTRAL KAMCHATKA SEGMENT / TOLBACHIK	55.83	160.33	s_19 [15685]	BASALT [15685]	49.5799	-134.061	49.84	0.95	15.73	3.28	6.16	9.11134	9.61	9.83	0.12	1.17	2.51	0.25		66.0092	1.97988	1242.71	1.28292	1456.3	1.17602									5695.25
[4694][4190]	KAMCHATKA ARC	KAMCHATKA ARC / KAMCHATKA ARC / CENTRAL KAMCHATKA SEGMENT / TOLBACHIK	55.53	160.27	s_K-3 [4694]	NOT GIVEN [4694] / BASALT [4190]	46.5176	-118.504	50.24	0.92	13.95	9.72		8.74606	11.87	9.44	0.16	0.79	2.04	0.22		66.019	1.1062	1232.59	1.0603	1602.53	1.25936		1.42497	99.5283			7.27	0.62		5515.4					113	79		17.8	322	18.7	79.3	2.12
[16541]	KAMCHATKA ARC	KAMCHATKA ARC / KAMCHATKA ARC / CENTRAL KAMCHATKA SEGMENT / KLYUCHEVSKOY	56.05	160.63	s_1 [16541]	BASALT [16541]	49.2072	-124.087	51.38	0.91	13.51	2.98	6.42	9.1014	9.68	11.67	0.19	0.68	2.28	0.15		69.7702	1.04554	1233.58	1.05524	1589.3	1.30318									5455.45
[16541]	KAMCHATKA ARC	KAMCHATKA ARC / KAMCHATKA ARC / CENTRAL KAMCHATKA SEGMENT / KLYUCHEVSKOY	56.05	160.63	s_2 [16541]	BASALT [16541]	49.2072	-124.087	51.39	0.88	13.83	2.82	6.19	8.72744	9.75	11.17	0.16	0.76	2.52	0.015		69.7315	1.28229	1223.38	1.03618	1514.3	1.26874									5275.6
[16541]	KAMCHATKA ARC	KAMCHATKA ARC / KAMCHATKA ARC / CENTRAL KAMCHATKA SEGMENT / KLYUCHEVSKOY	56.05	160.63	s_3 [16541]	BASALT [16541]	49.2072	-124.087	51.26	0.9	13.28	2.88	6.48	9.07142	9.16	11.6	0.17	0.68	2.39	0.22		69.7129	1.14103	1233.29	1.04296	1577.97	1.2939									5395.5
[16541]	KAMCHATKA ARC	KAMCHATKA ARC / KAMCHATKA ARC / CENTRAL KAMCHATKA SEGMENT / KLYUCHEVSKOY	56.05	160.63	s_4 [16541]	BASALT [16541]	49.2072	-124.087	51.66	0.93	14.18	2.57	6.39	8.70249	9.45	10.94	0.16	0.74	2.39	0.14		69.3515	1.13128	1220.85	0.989004	1478.59	1.22579									5575.35
[16541]	KAMCHATKA ARC	KAMCHATKA ARC / KAMCHATKA ARC / CENTRAL KAMCHATKA SEGMENT / KLYUCHEVSKOY	56.05	160.63	s_5 [16541]	BASALT [16541]	49.2072	-124.087	51.43	0.9	13.6	2.5	6.42	8.6695	9.44	11.92	0.16	0.85	2.49	0.14		71.2221	1.32332	1220.08	1.03547	1498.27	1.30093									5395.5
[16541]	KAMCHATKA ARC	KAMCHATKA ARC / KAMCHATKA ARC / CENTRAL KAMCHATKA SEGMENT / KLYUCHEVSKOY	56.05	160.63	s_6 [16541]	BASALT [16541]	49.2072	-124.087	52.64	0.85	13.65	3.14	5.59	8.41537	9.58	11.14	0.16	0.84	2.76	0.17		70.4385	1.3444	1208.75	0.942647	1439.46	1.25015									5095.75
[16541]	KAMCHATKA ARC	KAMCHATKA ARC / KAMCHATKA ARC / CENTRAL KAMCHATKA SEGMENT / KLYUCHEVSKOY	56.05	160.63	s_7 [16541]	BASALT [16541]	49.2072	-124.087	52.02	0.91	14.25	3.47	5.53	8.65231	9.78	9.6	0.17	0.77	2.7	0.17		66.635	1.33491	1219.62	0.980042	1461.45	1.17574									5455.45
[16541]	KAMCHATKA ARC	KAMCHATKA ARC / KAMCHATKA ARC / CENTRAL KAMCHATKA SEGMENT / KLYUCHEVSKOY	56.05	160.63	s_8 [16541]	BASALT [16541]	49.2072	-124.087	52.08	0.9	16.14	2.41	6.18	8.34852	9.18	8.74	0.14	0.7	2.81	0.13		65.3308	1.35684	1210.47	0.956703	1326.27	1.04789									5395.5
[16541]	KAMCHATKA ARC	KAMCHATKA ARC / KAMCHATKA ARC / CENTRAL KAMCHATKA SEGMENT / KLYUCHEVSKOY	56.01	160.1	s_10 [16541]	BASALT [16541]	55.0166	-158.796	52.75	0.92	15.77	3.3	5.54	8.50934	9.22	8.76	0.17	0.98	2.63	0.18		64.9495	1.33663	1212.79	0.947903	1319.44	1.05899									5515.4
[16541]	KAMCHATKA ARC	KAMCHATKA ARC / KAMCHATKA ARC / CENTRAL KAMCHATKA SEGMENT / KLYUCHEVSKOY	56.05	160.63	s_11 [16541]	BASALT [16541]	49.2072	-124.087	52.7	0.9	14.88	3.62	4.98	8.23728	9.7	8.71	0.18	0.97	2.55	0.19		65.5564	1.27736	1205.87	0.879818	1333.17	1.09061									5395.5
[16541]	KAMCHATKA ARC	KAMCHATKA ARC / KAMCHATKA ARC / CENTRAL KAMCHATKA SEGMENT / KLYUCHEVSKOY	56.05	160.63	s_12 [16541]	BASALT [16541]	49.2072	-124.087	52.83	0.91	15.52	2.77	5.75	8.24245	9.51	8.21	0.18	1	2.64	0.17		64.1951	1.34787	1206.22	0.894616	1296.28	1.04371									5455.45
[16541]	KAMCHATKA ARC	KAMCHATKA ARC / KAMCHATKA ARC / CENTRAL KAMCHATKA SEGMENT / KLYUCHEVSKOY	56.05	160.63	s_13 [16541]	BASALT [16541]	49.2072	-124.087	52.08	0.98	15.84	2.66	6.21	8.60347	9.25	8.4	0.15	0.86	3.01	0.16		63.7344	1.64944	1219.83	1.03506	1361.72	1.0608									5875.1
[16541]	KAMCHATKA ARC	KAMCHATKA ARC / KAMCHATKA ARC / CENTRAL KAMCHATKA SEGMENT / KLYUCHEVSKOY	56.05	160.63	s_14 [16541]	BASALT [16541]	49.2072	-124.087	52	0.96	16.75	2.81	5.91	8.43844	9.22	8.36	0.15	0.83	2.95	0.14		64.071	1.5876	1214.79	1.03027	1308.94	1.02449									5755.2
[16541]	KAMCHATKA ARC	KAMCHATKA ARC / KAMCHATKA ARC / CENTRAL KAMCHATKA SEGMENT / KLYUCHEVSKOY	56.05	160.63	s_15 [16541]	BASALT [16541]	49.2072	-124.087	52.43	0.96	16.24	2.44	6.24	8.43551	8.98	8.31	0.15	1.11	2.87	0.15		63.9408	1.67979	1213.05	1.00192	1280.72	1.02815									5755.2
[16541]	KAMCHATKA ARC	KAMCHATKA ARC / KAMCHATKA ARC / CENTRAL KAMCHATKA SEGMENT / KLYUCHEVSKOY	56.05	160.63	s_17 [16541]	BASALT [16541]	49.2072	-124.087	52.85	0.85	16.24	2.84	6.03	8.58543	9.04	7.52	0.18	1.04	2.86	0.19		61.1895	1.54416	1218.57	0.977169	1291.11	0.991843									5095.75
[16541]	KAMCHATKA ARC	KAMCHATKA ARC / KAMCHATKA ARC / CENTRAL KAMCHATKA SEGMENT / KLYUCHEVSKOY	56.05	160.63	s_19 [16541]	BASALT [16541]	49.2072	-124.087	52.43	0.94	15.9	2.6	5.96	8.29948	9.75	8.32	0.14	0.98	2.75	0.19		64.3424	1.47539	1209.66	0.961995	1313.76	1.05451									5635.3
[16541]	KAMCHATKA ARC	KAMCHATKA ARC / KAMCHATKA ARC / CENTRAL KAMCHATKA SEGMENT / KLYUCHEVSKOY	56.05	160.63	s_20 [16541]	BASALT [16541]	49.2072	-124.087	52.92	1.03	15.89	2.02	6.58	8.3976	9.74	7.26	0.14	0.98	2.65	0.19		60.8788	1.32832	1213.8	0.917832	1311.83	1.00086									6174.85
[16541]	KAMCHATKA ARC	KAMCHATKA ARC / KAMCHATKA ARC / CENTRAL KAMCHATKA SEGMENT / KLYUCHEVSKOY	56.05	160.63	s_21 [16541]	BASALT [16541]	49.2072	-124.087	52.72	0.96	15.8	2.66	5.93	8.32347	9.32	8.02	0.17	0.88	2.8	0.16		63.4285	1.39325	1209.72	0.921336	1307.97	1.02617									5755.2
[4694][4190]	KAMCHATKA ARC	KAMCHATKA ARC / KAMCHATKA ARC / CENTRAL KAMCHATKA SEGMENT / KLYUCHEVSKOY	56.05	160.63	s_K-1 [4694]	NOT GIVEN [4694] / BASALT [4190]	49.2072	-124.087	52.23	0.86	16.17	8.95		8.05321	10.08	7.61	0.16	0.89	2.49	0.18		62.9758	1.23775	1204.87	0.889793	1283.23	1.01022			203.243			10.2	0.786		5155.7								13.8	381	17.5	82.8	1.85
[10019][15882]	KAMCHATKA ARC	KAMCHATKA ARC / KAMCHATKA ARC / CENTRAL KAMCHATKA SEGMENT / TOLBACHIK	55.6725	160.24	s_K1-30 [10019] / s_K01-30 [15882]	BASALT [10019]	49.8102	-135.807	50.02	1.28	13.38			9.88	9.4	10.31	0.17	1.27	2.53	0.36		65.2578	2.05698	1266.97	1.37263	1662.08	1.29851									7673.6
[19034]	KAMCHATKA ARC	KAMCHATKA ARC / KAMCHATKA ARC / SOUTHERN KAMCHATKA SEGMENT / MUTNOVSKY	52.4601	158.162	s_CM-210 [19034]	BASALT [19034]	29.045	-80.3	50.22	0.93	17.83			9.16	10.96	8.24	0.11	0.28	2.07	0.22		61.8206	0.764889	1242.97	1.14582	1502.79	1.04509			114.851	2.83884	1.80992				5575.35								7.76	503	23.6	72.5	2.02	0.429
[19034]	KAMCHATKA ARC	KAMCHATKA ARC / KAMCHATKA ARC / SOUTHERN KAMCHATKA SEGMENT / MUTNOVSKY	52.4601	158.162	s_CM-211 [19034]	BASALT [19034]	29.045	-80.3	49.39	0.82	17.81			9.69	10.74	8.5	0.18	0.4	2.28	0.19		61.2245	1.12401	1263.84	1.35637	1570.66	1.08273			115.544	2.87395	1.81092				4915.9								7.04	514	23.6	70.5	1.93	0.359
[19553]	KAMCHATKA ARC	KAMCHATKA ARC / KAMCHATKA ARC / CENTRAL KAMCHATKA SEGMENT / SHIVELUCH (SHEVELUCH)	56.57	161.2	s_K1-18B [19553]	ANDESITE, BASALTIC [19553]	38.4628	-103.17	52.108	0.86589	13.9058			8.38058	8.9063	10.6484	0.164931	1.98949	2.60798	0.422637		69.5779	2.32066	1212.3	1.08075	1288.55	1.22186									5191.01	229	669	37	148		64	13	44	485	21	93
[19739]	KAMCHATKA ARC	KAMCHATKA ARC / KAMCHATKA ARC / CENTRAL KAMCHATKA SEGMENT / SHIVELUCH (SHEVELUCH)	56.63	161.32	s_753/3 [19739]	BASALT [19739]	34.5018	-99.2289	51.03	0.86	14.77			8.51	8.27	10.31	0.163	1.75	2.69	0.39		68.5607	2.45499	1218.28	1.13282	1286.51	1.16943		0.299145	247.5						5155.7	206	453	16	73	35	80		34	532	20	117	2
[19739]	KAMCHATKA ARC	KAMCHATKA ARC / KAMCHATKA ARC / CENTRAL KAMCHATKA SEGMENT / SHIVELUCH (SHEVELUCH)	56.63	161.32	s_773/1 [19739]	BASALT [19739]	34.5018	-99.2289	51.28	0.79	13.02			8.76	8.31	11.67	0.16	1.78	2.58	0.36		70.5704	2.29585	1225.69	1.13664	1388.13	1.298		0.801802	78.3333						4736.05	224	644	40	228	89	81		37	485	24	111	6
[19739]	KAMCHATKA ARC	KAMCHATKA ARC / KAMCHATKA ARC / CENTRAL KAMCHATKA SEGMENT / SHIVELUCH (SHEVELUCH)	56.63	161.32	s_735-2A [19739]	ANDESITE, BASALTIC [19739]	34.5018	-99.2289	52.08	0.83	13.49			8.34	7.94	11.59	0.16	1.84	2.47	0.33		71.4403	2.04583	1207.57	1.00382	1281.22	1.23808		0.463636	97.6						4975.85	215	596		106	51	81		36	485	24	110	5
[19739]	KAMCHATKA ARC	KAMCHATKA ARC / KAMCHATKA ARC / CENTRAL KAMCHATKA SEGMENT / SHIVELUCH (SHEVELUCH)	56.63	161.32	s_2010/B1 [19739]	BASALT [19739]	34.5018	-99.2289	51.43	0.78	15.32			8.11	7.96	11.05	0.153	0.87	3.31	0.12		71.0357	2.07265	1203.53	1.04567	1301.82	1.15873		0.755319	48.6667						4676.1	182	588		126	71	74		17	376	17	94	6
[19739]	KAMCHATKA ARC	KAMCHATKA ARC / KAMCHATKA ARC / CENTRAL KAMCHATKA SEGMENT / SHIVELUCH (SHEVELUCH)	56.63	161.32	s_776/21 [19739]	BASALT [19739]	34.5018	-99.2289	50.96	0.83	14.48			8.7	8.9	11.49	0.17	0.74	2.58	0.18		70.39	1.38472	1223.1	1.06741	1462.33	1.2377		1.4023	38.5						4975.85	181	755		219	122	83		12	398	17	87	6
[20267]	NEW ZEALAND	NEW ZEALAND / COROMANDEL-TAUPO / TAUPO VOLCANIC ZONE / RUAPEHU / OREORE FORMATION	-39.55	175.3	s_KL11 [20267]	ANDESITE [20267]	23.9467	-51.3775	51.4066	0.614154	17.0428			7.55	8.09915	6.55417	0.135306	0.518192	3.03238	0.0537384	2.36006	60.9769	1.49961	1195.4	0.819009	1159.61	0.871963	5.42742	0.450619	72.4781	4.05781	1.56156			33.8769	3681.85	183.864	212.223	75.0193	56.3759	37.0984	192.004	16.8442	12.903	268.942	20.5712	82.3276	3.12552	1.27574
[20267]	NEW ZEALAND	NEW ZEALAND / COROMANDEL-TAUPO / TAUPO VOLCANIC ZONE / RUAPEHU / OREORE FORMATION	-39.55	175.3	s_KL10 [20267]	ANDESITE [20267]	23.9467	-51.3775	50.8948	0.64865	18.1719			7.94	8.25818	6.62204	0.140379	0.35821	2.73982	0.0377572	2.17397	60.0195	1.21571	1207.57	0.888492	1194.55	0.852689	5.5428	0.380287	80.4564	4.11944	1.73932			35.4737	3888.66	196.624	218.933	67.2999	61.8372	33.9384	172.364	17.9489	8.10076	295.275	13.7331	89.2441	3.15972	0.83722
[21070]	NEW ZEALAND	NEW ZEALAND / COROMANDEL-TAUPO / TAUPO VOLCANIC ZONE / TONGARIRO VOLCANIC CENTER - RED CRATER	-39.65	175.65	s_SM-008 [21070]	ANDESITE, BASALTIC [21070]	19.5877	-38.5642	52.99	0.74	15.19			8.83	10.39	7.63	0.17	0.68	2.43	0.12	-0.14	60.8669	0.968178	1226.09	0.910727	1436.81	1.0572	5.9	0.84127	51.6	4.12429	1.69492			40	4436.3	236	257	54	47	53	63	13	16.7	264	16	63	2.5	0.84
[3501][3760][21089][3319][2142]	NEW ZEALAND	NEW ZEALAND / COROMANDEL-TAUPO / TAUPO VOLCANIC ZONE / KAKUKI	-38.47	176.17	s_TVZ-15 [3501]	BASALT [3501] / NOT GIVEN [2142]	37.3382	-68.8246	48.61	0.89	18.12	1.05	7	7.93	11.18	9.14	0.13	0.27	2.49	0.14	0.2	67.476	1.35786	1212.41	1.14071	1380.31	1.08208	5.96429	0.631579	28.4211	3.46108	1.76048			28	5335.55	167	80		120	60	80	15	4	350	16.2	95	3.8
[15980]	NEW ZEALAND	NEW ZEALAND / COROMANDEL-TAUPO / COROMANDEL VOLCANIC ZONE / MERCURY BASALTS SUBGROUP	-39.82	175.57	s_MC45 [15980]	BASALT, OLIVINE-CLINOPYROXENE [15980]	19.146	-38.401	50.82	0.73	14.1	1.55167	7.75833	9.15452	9.78	12.4	0.16	0.48	2.11	0.11		70.9145	0.857813	1235.34	1.08206	1605.41	1.31985	6.27072	0.946269	60	4.11111	1.68333			36.2	4376.35	227	906	53.5	273	63.4	74	15	5	301	19.4	67	2.2	0.32
[15980]	NEW ZEALAND	NEW ZEALAND / COROMANDEL-TAUPO / COROMANDEL VOLCANIC ZONE / MERCURY BASALTS SUBGROUP	-39.82	175.57	s_NZ6C961109 [15980]	BASALT, OLIVINE-CLINOPYROXENE [15980]	19.146	-38.401	50.82	0.73	14.1	1.55167	7.75833	9.15452	9.78	12.4	0.16	0.48	2.11	0.11		70.9145	0.857813	1235.34	1.08206	1605.41	1.31985	6.56425	0.947761	60	3.94286	1.65143			35.8	4376.35	235	906	58.2	264	63.5	75	15	5	307	19	67	2.2	0.35
[6624]	NEW ZEALAND	NEW ZEALAND / COROMANDEL-TAUPO / TAUPO VOLCANIC ZONE / EGMONT (MOUNT TARANAKI)	-39.296	174.065	s_T15 [6624]	BASALT [6624]			48.52	0.89	18.09	1.05	6.99	7.93479	11.16	9.12	0.13	0.27	2.49	0.14		67.4147	1.38	1213.25	1.14631	1383.33	1.08256	6.82143	0.708861	35	3.5625				28	5335.55	191	85		113	56	70	14	4	350	19	79	2	0.14
[5505]	NEW ZEALAND	NEW ZEALAND / COROMANDEL-TAUPO / TAUPO VOLCANIC ZONE / ONGAROTO	-38	175	s_2 [5505]	BASALT [5505]	60.9732	-130.154	50.97	1.04	15.58			9.15	10.68	9.13	0.16	0.56	2.56	0.25		64.2355	1.22138	1240.39	1.15391	1559.11	1.16015	6.9375	0.461538				4.3		32	6234.8	222	475	46	138	48		13	10.8	312		104
[3319]	NEW ZEALAND	NEW ZEALAND / COROMANDEL-TAUPO / TAUPO VOLCANIC ZONE / TONGARIRO VOLCANIC CENTER - RUAPEHU	-39.28	175.57	s_VUW14855 [3319]	BASALT [3319]	25.443	-54.1169	52.27	0.64	15.34	1.12	7.45	8.45778	9.61	9.15	0.16	0.58	2.76	0.08	-0.05	66.0709	1.20341	1212.81	0.930126	1386.99	1.10167	7	1.625	182	2.77844				35	3836.8	245	375		139	78	88	15	12	199	17	48	1
[15980]	NEW ZEALAND	NEW ZEALAND / COROMANDEL-TAUPO / COROMANDEL VOLCANIC ZONE / MERCURY BASALTS SUBGROUP	-36.72	175.79	s_BH76 [15980]	BASALT, OLIVINE-CLINOPYROXENE-ORTHOPYROXENE-PLAGIOCLASE [15980]	69.6394	-252.563	51.67	1.06	15.71	1.48	7.4	8.7317	9.38	9.29	0.15	0.6	3.08	0.18		65.6957	1.56198	1223.71	1.08315	1436.13	1.11551	7.16088	0.284545	43.125	5.66524	1.76824			31.7	6354.7	227	462	44.4	192.5	31.3	82	17	16	294	26.3	110	4.8	0.69
[3217]	NEW ZEALAND	NEW ZEALAND / COROMANDEL-TAUPO / TAUPO VOLCANIC ZONE / TONGARIRO VOLCANIC CENTER - RUAPEHU / MANGAWHERO FORMATION	-39.82	175.57	s_14855 [3217]	BASALT [3217]	19.146	-38.401	52.23	0.66	15.57	2.7	6.34	8.76946	9.63	8.73	0.16	0.58	2.59	0.09	0.75	64.1821	1.08872	1223.1	0.95776	1416	1.07961	7.17143	1.54						35	3956.7	251	380		142	77	85	16	11	201	18	50	0
[15980]	NEW ZEALAND	NEW ZEALAND / COROMANDEL-TAUPO / COROMANDEL VOLCANIC ZONE / MERCURY BASALTS SUBGROUP	-36.72	175.79	s_BH75 [15980]	BASALT, OLIVINE-CLINOPYROXENE-ORTHOPYROXENE-PLAGIOCLASE [15980]	69.6394	-252.563	52.75	1.09	16.32	2.04	6.8	8.63559	9.6	7.57	0.14	0.65	2.85	0.19		61.2086	1.25641	1219.94	0.966356	1366.56	1.00519	7.1746	0.228947	45.4167	4.92308	1.77179			31.5	6534.55	226	376	40.8	136.5	26.1	88	18	18	290	46.2	114	4.8	0.66
[3319]	NEW ZEALAND	NEW ZEALAND / COROMANDEL-TAUPO / TAUPO VOLCANIC ZONE / TATUA	-38.5083	176.09	s_VUW33437 [3319]	BASALT [3319]	39.89	-74.0559	49.43	1.15	17.78	1.12	7.84	8.84778	11.68	7.46	0.15	0.31	2.95	0.2	-0.33	60.2807	1.65281	1243.93	1.30927	1530.58	1.06445	7.20588	0.353535	26	3.72449				34	6894.25	245	80		58	35	75	17	4	357	24	99	4
[3319]	NEW ZEALAND	NEW ZEALAND / COROMANDEL-TAUPO / TAUPO VOLCANIC ZONE / ONGAROTO	-38	175	s_VUW33438 [3319]	BASALT [3319]	34.3564	-59.8642	51.02	1.07	15.49	1.18	7.84	8.90176	10.18	9.2	0.13	0.56	2.61	0.27	-0.29	65.0387	1.25298	1231.98	1.09345	1509.31	1.14302	7.27273	0.509259	37.4	4.95413				33	6414.65	240	530		138	55	82	15	10	330	25	108	5
[3217]	NEW ZEALAND	NEW ZEALAND / COROMANDEL-TAUPO / TAUPO VOLCANIC ZONE / TONGARIRO VOLCANIC CENTER - RED CRATER	-39.13	175.642	s_R-C11965 [3217]	BASALT [3217]			51.94	0.72	15.14	9.82		8.83604	10.19	7.6	0.17	0.66	2.39	0.08	0.08	60.7567	1.04055	1231.06	0.952842	1453.62	1.0605	7.52778	1.07353						36	4316.4	271	281		63	73	84	15	20	278	21	68	0
[6624]	NEW ZEALAND	NEW ZEALAND / COROMANDEL-TAUPO / TAUPO VOLCANIC ZONE / EGMONT (MOUNT TARANAKI)	-39.296	174.065	s_T10 [6624]	BASALT [6624]			51.94	0.72	15.14	1.18	7.87	8.93176	10.19	7.6	0.17	0.66	2.39	0.08		60.4995	1.04055	1233.6	0.966976	1466.13	1.06318	7.52778	1.07353	68.5	4.72222	1.62222			36	4316.4	271	281		63	73	84	15	20	278	24	68	2	1.12
[3319]	NEW ZEALAND	NEW ZEALAND / COROMANDEL-TAUPO / TAUPO VOLCANIC ZONE / TONGARIRO VOLCANIC CENTER - RED CRATER	-38.5	175	s_VUW11965 [3319]	BASALT [3319]	25.2351	-37.1113	52.45	0.73	15.29	1.18	7.87	8.93176	10.29	7.67	0.17	0.67	2.41	0.08	0.08	60.7184	1.00385	1230.96	0.952352	1453.63	1.06047	7.52778	1.07353	45.6667	3.82723				36	4376.35	271	281		63	73	84	15	20	278	21	68	3
[21420]	NEW ZEALAND	NEW ZEALAND / COROMANDEL-TAUPO / TAUPO VOLCANIC ZONE / KAPENGA	-38.3	176.25	s_4ONG5 [21420]	BASALT [21420]	42.1083	-75.6483	51.11	1.07	15.52			9.01	10.22	9.45	0.17	0.58	2.67	0.27	-0.62	65.3728	1.3024	1234.32	1.12994	1522.37	1.15947	7.8		28.1667	5.10931	1.72065			35	6414.65	273	560	43	156			16	10	319	25	122	6	0.25
[21089]	NEW ZEALAND	NEW ZEALAND / COROMANDEL-TAUPO / TAUPO VOLCANIC ZONE / RUAPEHU / MANGAWHERO FORMATION	-39.24	175.52	s_R04/04 [21089]	BASALT [21089]			52.7887	0.655948	15.5003			8.64	9.63488	9.01303	0.154312	0.568904	2.6438	0.0971718	-0.23	65.2502	1.05442	1215.5	0.912667	1393.58	1.08645	7.95693	1.32923	113.992	3.20417	1.62689			32.1983	3932.41	256.2	366.3		136	75.5	76.9	16.6	12.1	200.8	17.2846	56.8	1.77381
[16502]	NEW ZEALAND	NEW ZEALAND / COROMANDEL-TAUPO / TAUPO VOLCANIC ZONE / TONGARIRO VOLCANIC CENTER - RUAPEHU / MANGAWHERO FORMATION	-39.82	175.57	s_R/04-4 [16502]	ANDESITE, BASALTIC [16502]	19.146	-38.401	52.7887	0.655948	15.5003			8.64	9.63488	9.01303	0.154312	0.568904	2.6438	0.0971718	-0.23	65.2502	1.05442	1215.5	0.912667	1393.58	1.08645	7.95693	1.32923	113.992	3.20417	1.62689			32.1983	3932.41	256.2	366.3		136	75.5	76.9	16.6	12.1	200.8	17.2846	56.8	1.77381	0.300645
[6487][6472]	NEW ZEALAND	NEW ZEALAND / COROMANDEL-TAUPO / TAUPO VOLCANIC ZONE	-38.0167	175.567	s_24131 [6487]	BASALT, OLIVINE [6487]	70.9491	-190.36	49.6	1.45	14.5	2	8	9.7996	9.97	9.67	0.18	1.33	2.83	0.39	1.54	63.9795	2.62206	1268.88	1.50522	1632.48	1.26325	8.28	0.518248						25	8692.75	207	465		168	71		18	29	487		137
[21126]	NEW ZEALAND	NEW ZEALAND / COROMANDEL-TAUPO / TAUPO VOLCANIC ZONE / TONGARIRO VOLCANIC CENTER - RUAPEHU	-39.1423	175.672	s_150318-03 [21126]	ANDESITE, BASALTIC [21126]	28.5314	-59.9644	52.95	0.74	15.38			8.7	10.26	7.74	0.17	0.6	2.37	0.12		61.5589	0.886523	1220.9	0.873946	1413.63	1.04533									4436.3
[21420]	NEW ZEALAND	NEW ZEALAND / COROMANDEL-TAUPO / TAUPO VOLCANIC ZONE / KAPENGA	-38.3	176.25	s_4ONG1 [21420]	BASALT [21420]	42.1083	-75.6483	50.53	1.05	15.71			8.89	10.36	9.26	0.17	0.54	2.51	0.24	0.06	65.2164	1.23539	1233.47	1.12117	1514.88	1.14706			24.4286						6294.75	242	431		130		75	17	7	302	24	101	7
[21420]	NEW ZEALAND	NEW ZEALAND / COROMANDEL-TAUPO / TAUPO VOLCANIC ZONE / KAPENGA	-38.3	176.25	s_7KAK2 [21420]	BASALT [21420]	42.1083	-75.6483	49.32	1.12	17.54			8.75	11.52	7.71	0.16	0.34	2.77	0.2	0.06	61.3311	1.5304	1240.23	1.26427	1515.33	1.0713			13						6714.4	238	82		63		74	16	0	330	24	99	6
[6374]	NEW ZEALAND	NEW ZEALAND / COROMANDEL-TAUPO / COROMANDEL VOLCANIC ZONE / MERCURY ISLAND / TI POINT-STONY BATTER VOLCANICS	-36.5833	175.917	s_44410 [6374]	BASALT [6374]	61.3134	-184.378	50.97	1.05	17.1			7.82	9.28	8.13	0.15	0.88	3.09	0.3	0.46	65.1732	1.97753	1201.42	1.02976	1238.52	1.00528		0.330882	77.2727	14.125					6294.75	220	325		160	45	81		18.7	676	26.1	136	7.7
[6374]	NEW ZEALAND	NEW ZEALAND / COROMANDEL-TAUPO / COROMANDEL VOLCANIC ZONE / MERCURY ISLAND / TI POINT-STONY BATTER VOLCANICS	-36.5833	175.917	s_44411 [6374]	BASALT [6374]	61.3134	-184.378	50.94	1.11	17.24			7.86	9.21	7.28	0.12	0.88	3.27	0.31	0.86	62.5072	2.16908	1206.19	1.05034	1238.81	0.967156		0.205882	72	12.5385					6654.45	223	339		174	28	77		18.7	667	28.9	136	8
[6426]	NEW ZEALAND	NEW ZEALAND / COROMANDEL-TAUPO / COROMANDEL VOLCANIC ZONE / MERCURY BASALTS SUBGROUP	-36.5	175.5	s_H24 [6426]	BASALT [6426]	61.9295	-196.166	51.85	1.17	15.99	1.47	7.51	8.83271	9.86	8.66	0.17	0.52	2.65	0.16	0.36	63.8311	1.13547	1226.32	1.02792	1453.19	1.07997									7014.15
[6426]	NEW ZEALAND	NEW ZEALAND / COROMANDEL-TAUPO / COROMANDEL VOLCANIC ZONE / MERCURY BASALTS SUBGROUP	-36.5	175.5	s_H29 [6426]	DOLERITE [6426]	61.9295	-196.166	50.46	1.06	17.09	1.33	6.76	7.95673	9.68	9.01	0.16	0.78	3.39	0.28	0.71	67.0866	2.33095	1207.67	1.15775	1303.39	1.07621									6354.7
[6426]	NEW ZEALAND	NEW ZEALAND / COROMANDEL-TAUPO / COROMANDEL VOLCANIC ZONE / MERCURY BASALTS SUBGROUP	-36.5	175.5	s_H12 [6426]	DOLERITE [6426]	61.9295	-196.166	49.67	1.25	17.89	1.38	7.04	8.28172	11.64	7.13	0.15	0.48	3.19	0.18	0.49	60.7794	2.01933	1227.48	1.25058	1431.61	1.0379									7493.75
[3760][2142]	NEW ZEALAND	NEW ZEALAND / COROMANDEL-TAUPO / TAUPO VOLCANIC ZONE / TONGARIRO VOLCANIC CENTER - RUAPEHU	-39.28	175.57	s_TVZ-16 [3760]	ANDESITE, BASALTIC [3760] / NOT GIVEN [2142]	25.443	-54.1169	52.27	0.64	15.34			8.45	9.61	9.15	0.16	0.58	2.76	0.08	-0.05	66.0915	1.20341	1212.81	0.930009	1386.46	1.10145									3836.8
[3760][21089][2142]	NEW ZEALAND	NEW ZEALAND / COROMANDEL-TAUPO / TAUPO VOLCANIC ZONE / TATUA	-38.5083	176.09	s_TVZ-13 [3760]	BASALT [3760] / NOT GIVEN [2142]	39.89	-74.0559	49.43	1.15	17.78	1.12	7.84	8.49	11.68	7.46	0.15	0.31	2.95	0.2	-0.33	61.2647	1.65281	1233.35	1.24454	1482.3	1.05453		0.36036	33.0303	3.595	1.86				6894.25	219	80		80	40	80	17	3	348	20	111	3.3
[3760][2142]	NEW ZEALAND	NEW ZEALAND / COROMANDEL-TAUPO / TAUPO VOLCANIC ZONE / TONGARIRO VOLCANIC CENTER - RED CRATER	-38.5	175	s_TVZ-10 [3760]	ANDESITE, BASALTIC [3760] / NOT GIVEN [2142]	73.3643	-199.867	52.45	0.73	15.29			8.93	10.29	7.67	0.17	0.67	2.41	0.08	0.08	60.7231	1.00385	1230.96	0.95233	1453.51	1.06042									4376.35
[3760][21089][2142]	NEW ZEALAND	NEW ZEALAND / COROMANDEL-TAUPO / TAUPO VOLCANIC ZONE / ONGAROTO	-38	175	s_TVZ-14 [3760]	BASALT [3760] / NOT GIVEN [2142]	58.6137	-109.336	51.02	1.07	15.49	1.18	7.84	8.89	10.18	9.2	0.13	0.56	2.61	0.27	-0.29	65.0688	1.25298	1231.13	1.0888	1506.55	1.14268		0.384615	50.9677	5.03889	1.73333				6414.65	164	370		80	30	0	9	7	265	17.3	78	3.1
[6793]	NEW ZEALAND	NEW ZEALAND / NORTHLAND-AUCKLAND PENINSULA / SOUTH AUCKLAND VOLCANIC ZONE	-37.25	175.1	s_AU26116 (15) [6793]	THOLEIITE, OLIVINE [6793]	60.9732	-130.154	47.52	2.16	13.51	1.64	10.74	12.2157	8.82	10.61	0.35	0.71	3.09	0.39		60.9893	3.19469	1357.89	2.20991	2182.25	1.40854		0.592814	20.3333						12949.2	202	340	66	204	99	102	20	10	475	26	167	6
[24402]	NEW ZEALAND	NEW ZEALAND / COROMANDEL-TAUPO / TAUPO VOLCANIC ZONE / ONGAROTO	-38.3861	175.94	s_ONG [24402]	BASALT [24402]	50.3195	-94.5123	49.85	1.09	15.6			9.22	10.43	9.3	0.17	0.54	2.49	0.29	0.03	64.4838	1.34028	1246.82	1.22376	1585.48	1.1727			42.4096	5.24887	1.79186				6534.55				159				10.2	320	19.4	110	4.15
[24402]	NEW ZEALAND	NEW ZEALAND / COROMANDEL-TAUPO / TAUPO VOLCANIC ZONE / KAKUKI	-38.493	176.132	s_KAK [24402]	BASALT [24402]	39.89	-74.0559	48.6	1.13	17.62			8.85	11.65	7.62	0.16	0.31	2.54	0.21	0.73	60.7817	1.45045	1246.76	1.2976	1545.85	1.07218			24.269	3.5533	1.85279				6774.35				66				4.5	324	17.6	95	3.42
[18117]	NEW ZEALAND	NEW ZEALAND / COROMANDEL-TAUPO / TAUPO VOLCANIC ZONE / ONGAROTO	-38.3861	175.94	s_5010-1 [18117]	BASALT [18117]	50.3195	-94.5123	50.13	1.05	15.04			8.99	10.6	9.01	0.17	0.51	2.39	0.2	0.78	64.3367	1.17952	1239.69	1.11918	1577.8	1.16925			34.4519	4.37209	1.70233				6294.75	249	423		112				10	299	22.4	91	4.47
[18117]	NEW ZEALAND	NEW ZEALAND / COROMANDEL-TAUPO / TAUPO VOLCANIC ZONE / ONGAROTO	-38.3861	175.94	s_5010-3 [18117]	BASALT [18117]	50.3195	-94.5123	50.03	1.02	15.39			8.77	10.48	9	0.17	0.5	2.42	0.23	0.87	64.8779	1.21286	1232.85	1.09567	1527.29	1.14845			37.2043	4.95146	1.78155				6114.9	256	444		118				8	312	22.5	94	4.65
[18117]	NEW ZEALAND	NEW ZEALAND / COROMANDEL-TAUPO / TAUPO VOLCANIC ZONE / ONGAROTO	-38.3861	175.94	s_5010-5 [18117]	BASALT [18117]	50.3195	-94.5123	49.53	1.13	15.57			9.24	10.03	8.74	0.17	0.56	2.55	0.33	0.99	62.9986	1.48118	1251.12	1.23648	1578.81	1.13992			28.3607	5.46218	1.79832				6774.35	249	333		125				9	340	25.7	113	6.1
[18117]	NEW ZEALAND	NEW ZEALAND / COROMANDEL-TAUPO / TAUPO VOLCANIC ZONE / ONGAROTO	-38.3861	175.94	s_5010-8 [18117]	BASALT [18117]	50.3195	-94.5123	50.03	1.06	15.27			8.97	10.45	9.13	0.17	0.52	2.39	0.23	0.63	64.6906	1.20457	1238.73	1.1292	1559.78	1.16296			37.2709	5.06912	1.76959				6354.7	256	443		122				9	305	23.7	98	4.91
[18117]	NEW ZEALAND	NEW ZEALAND / COROMANDEL-TAUPO / TAUPO VOLCANIC ZONE / KAKUKI	-38.493	176.132	s_5002-1A [18117]	BASALT [18117]	39.89	-74.0559	48.69	1.12	17.24			8.74	11.51	7.72	0.16	0.33	2.61	0.19	0.63	61.3889	1.51909	1243.05	1.26821	1538.53	1.08242			22.2222	3.78238	1.81865				6714.4	227	80		56				4	338	21.1	97	3.87
[18117]	NEW ZEALAND	NEW ZEALAND / COROMANDEL-TAUPO / TAUPO VOLCANIC ZONE / KAKUKI	-38.493	176.132	s_5002-2 [18117]	BASALT [18117]	39.89	-74.0559	48.38	1.08	17.24			8.61	11.48	8.01	0.16	0.26	2.56	0.17	1.02	62.6107	1.47814	1239.2	1.24965	1532.14	1.09171			22.5464	3.76963	1.7801				6474.6	238	82		52				3	336	20.2	93	3.77
[18117]	NEW ZEALAND	NEW ZEALAND / COROMANDEL-TAUPO / TAUPO VOLCANIC ZONE / KAKUKI	-38.493	176.132	s_5002-3 [18117]	BASALT [18117]	39.89	-74.0559	48.5	1.12	16.99			8.76	11.35	7.71	0.16	0.34	2.56	0.19	1.27	61.304	1.52909	1244.68	1.26378	1547.65	1.08564			22.3684	3.8342	1.80311				6714.4	227	78		66				5	332	19.9	109	3.8
[18117]	NEW ZEALAND	NEW ZEALAND / COROMANDEL-TAUPO / TAUPO VOLCANIC ZONE / KAKUKI	-38.493	176.132	s_5002-4 [18117]	BASALT [18117]	39.89	-74.0559	48.54	1.12	17.08			8.7	11.43	7.89	0.16	0.33	2.63	0.19	0.88	62.0121	1.58152	1241.75	1.2676	1540.16	1.09401			22.739	3.86935	1.78392				6714.4	232	78		50				5	333	20.6	99	3.87
[12116]	IZU-BONIN ARC	IZU-BONIN ARC / BONIN (= OGASAWARA) ISLANDS / HAHA-JIMA	26.3	142	s_F2002-1 [12116]	BASALT, THOLEIITIC [12116]	44.7342	-76.0394	48.67	0.68	14.82			9.74	10.7	11.81	0.18	0.15	1.93	0.17	2.71	68.5786	0.763034	1264.21	1.30343	1779.86	1.33485			7.14286						4076.6	295	1194		227				1.9	153	18	36	2.1
[12116]	IZU-BONIN ARC	IZU-BONIN ARC / BONIN (= OGASAWARA) ISLANDS / HAHA-JIMA	26.3	142	s_E1903 [12116]	BASALT, THOLEIITIC [12116]	44.7342	-76.0394	48.85	0.7	14.92			9.64	10.56	11.63	0.19	0.15	1.62	0.19	2.19	68.4699	0.535538	1258.76	1.20446	1742.86	1.30114			10.5263						4196.5	314	980		221				1.9	159	18	35	1.9
[12116]	IZU-BONIN ARC	IZU-BONIN ARC / BONIN (= OGASAWARA) ISLANDS / HAHA-JIMA	26.3	142	s_F2002-2 [12116]	BASALT, THOLEIITIC [12116]	44.7342	-76.0394	50.24	0.64	14.3			9.56	10.71	11.38	0.16	0.13	1.92	0.06	1.36	68.18	0.580456	1250.31	1.10571	1737.05	1.30257			7.85714	1.16788	1.62774				3836.8	276	941		224				1.7	158	17	33	1.4
[12116]	IZU-BONIN ARC	IZU-BONIN ARC / BONIN (= OGASAWARA) ISLANDS / HAHA-JIMA	26.3	142	s_E2104 [12116]	BASALT, THOLEIITIC [12116]	44.7342	-76.0394	50.22	0.67	14.65			9.47	11.01	10.68	0.17	0.09	1.75	0.06	1.31	66.9966	0.46892	1248.49	1.06077	1718.94	1.25821			18.1818	1.18978	1.62044				4016.65	288	898		216				1.3	165	16	35	1.1
[12116]	IZU-BONIN ARC	IZU-BONIN ARC / BONIN (= OGASAWARA) ISLANDS / HAHA-JIMA	26.3	142	s_F2101-2 [12116]	ANDESITE, BASALTIC, CALC-ALKALINE [12116]	44.7342	-76.0394	52.35	0.57	14.2			8.57	11.33	9.78	0.2	0.26	1.98	0.1	1.81	67.2576	0.536642	1214.71	0.808873	1540.34	1.19765			11.1111	1.41358	1.54938				3417.15	245	760		175				3.5	167	19	42	1.8
[12116]	IZU-BONIN ARC	IZU-BONIN ARC / BONIN (= OGASAWARA) ISLANDS / HAHA-JIMA	26.3	142	s_F2101-1 [12116]	ANDESITE, BASALTIC, CALC-ALKALINE [12116]	44.7342	-76.0394	52.42	0.6	14.52			8.62	10.91	9.37	0.17	0.28	2.12	0.18	1.6	66.1775	0.611465	1216.65	0.827588	1513.01	1.15868			16.25	1.36413	1.5163				3597	248	747		156				3.5	170	21	43	1.6
[12116]	IZU-BONIN ARC	IZU-BONIN ARC / BONIN (= OGASAWARA) ISLANDS / HAHA-JIMA	26.3	142	s_E1902 [12116]	ANDESITE, BASALTIC, CALC-ALKALINE [12116]	44.7342	-76.0394	52.73	0.58	14.31			8.55	10.58	9.23	0.18	0.32	2.2	0.16	1.12	66.0229	0.652662	1213.54	0.796022	1485.5	1.14496			6						3477.1	237	827		155				4	165	21	42	3
[12116]	IZU-BONIN ARC	IZU-BONIN ARC / BONIN (= OGASAWARA) ISLANDS / HAHA-JIMA	26.3	142	s_F2101-3 [12116]	ANDESITE, BASALTIC, CALC-ALKALINE [12116]	44.7342	-76.0394	52.63	0.58	14.41			8.47	10.66	9.05	0.16	0.28	2.2	0.17	1.53	65.7916	0.638671	1211.39	0.781426	1477.53	1.13419			27.7778						3477.1	237	760		161				4.2	171	21	41	0.9
[12117]	IZU-BONIN ARC	IZU-BONIN ARC / BONIN (= OGASAWARA) ISLANDS / HAHA-JIMA	26.55	142.1	s_B1 [12117]	BASALT [12117]	41.6545	-74.2194	49.58	0.63	17.02	2.97	5.54	8.21241	11.26	9.87	0.22	0.33	2.11	0.08		68.3876	0.904802	1214.39	1.0506	1424.4	1.13832									3776.85
[12117]	IZU-BONIN ARC	IZU-BONIN ARC / BONIN (= OGASAWARA) ISLANDS / HAHA-JIMA	26.55	142.1	s_B3 [12117]	BASALT [12117]	41.6545	-74.2194	48.75	0.82	16.56	5.55	2.88	7.87389	11.55	7.58	0.17	0.33	2.34	0.16		63.4077	1.23981	1215.7	1.02151	1425.53	1.06339									4915.9
[12117]	IZU-BONIN ARC	IZU-BONIN ARC / BONIN (= OGASAWARA) ISLANDS / HAHA-JIMA	26.55	142.1	s_B4 [12117]	BASALT [12117]	41.6545	-74.2194	49.98	0.6	15.17	4.58	5.53	9.65108	11.07	9.37	0.16	0.38	1.87	0.06		63.6043	0.725287	1259.67	1.1658	1682.32	1.19811									3597								3.9
[12117]	IZU-BONIN ARC	IZU-BONIN ARC / BONIN (= OGASAWARA) ISLANDS / HAHA-JIMA	26.55	142.1	s_B6 [12117]	BASALT [12117]	41.6545	-74.2194	49.67	0.64	14.45	5.72	2.54	7.68686	10.79	8.54	0.16	0.48	2.41	0.22		66.6642	1.25219	1203.38	0.876356	1416.15	1.13962									3836.8
[12117]	IZU-BONIN ARC	IZU-BONIN ARC / BONIN (= OGASAWARA) ISLANDS / HAHA-JIMA	26.55	142.1	s_B8 [12117]	BASALT [12117]	41.6545	-74.2194	51.82	0.58	14.57	4.59	4.42	8.55008	10.8	9.13	0.18	0.27	1.91	0.09		65.7779	0.538821	1216.86	0.806642	1502.46	1.14046									3477.1								3.3
[2275]	IZU-BONIN ARC	IZU-BONIN ARC / BONIN (= OGASAWARA) ISLANDS / CHICHI-JIMA/TITI-ZIMA	27.3	142.3	s_C-5 [2275]	BONINITE [2275]	36.5227	-67.5862	49.97	0.19	10.17	3.97	3.71	7.28221	5.34	9.96	0.12	0.92	1.6	0.01		71.1141	0.911105	1185.34	0.400586	1227.77	1.1195									1139.05
[24514]	IZU-BONIN ARC	IZU-BONIN ARC / BONIN (= OGASAWARA) ISLANDS / CHICHI-JIMA/TITI-ZIMA	27.046	142.224	s_07111803 [24514]	BONINITE [24514]	38.187	-71.0712	51.7311	0.1391	11.8555			9.18	9.7742	10.8773	0.1105	1.4894	1.1794	0.0252		68.0797	0.815761	1234.69	0.866593	1509.94	1.30428			109.176	1.36219	1.3168				833.904	226.439	588.334		123.533				21.9448	67.3247	4.82287	12.5674	0.270754	0.441289
[24514]	IZU-BONIN ARC	IZU-BONIN ARC / BONIN (= OGASAWARA) ISLANDS / CHICHI-JIMA/TITI-ZIMA / MIKAZUKIJAMA FORMATION	27.1739	142.195	s_06062602A [24514]	BONINITE [24514]	37.0416	-68.8184	50.2004	0.3146	12.7812			10.45	8.9534	10.227	0.1354	0.1886	1.6656	0.0246		63.789	0.477481	1282.58	1.07851	1847.22	1.2551			19.9018	1.02529	1.34509				1886.03	254.54	195.652		103.566				2.97882	108.499	9.32268	28.8908	0.882458	0.0750083
[24514]	IZU-BONIN ARC	IZU-BONIN ARC / BONIN (= OGASAWARA) ISLANDS / CHICHI-JIMA/TITI-ZIMA / MIKAZUKIJAMA FORMATION	27.1808	142.198	s_06062603C [24514]	BONINITE [24514]	37.0416	-68.8184	52.9685	0.3379	14.692			8.67	10.2556	7.9475	0.1331	0.364	1.686	0.0364		62.2642	0.421578	1218.33	0.700904	1430.5	1.04626			34.1851	1.30899	1.40855				2025.71	278.711	249.169		91.3937				6.55774	122.618	12.3323	24.8368	0.748989	0.153443
[24514]	IZU-BONIN ARC	IZU-BONIN ARC / BONIN (= OGASAWARA) ISLANDS / HAHA-JIMA	26.6393	142.171	s_780/127 [24514]	ANDESITE [24514]	41.6545	-74.2194	51.76	0.58	16.15			8.85	10.78	8.12	0.18	0.34	1.91	0.04	0.02	62.2859	0.577911	1227.69	0.904925	1462.36	1.05371			41.2343	1.19273	1.52877				3477.1	286.9	217		82				3.87244	180.198	12.965	35.2073	0.741725	0.107653
[24514]	IZU-BONIN ARC	IZU-BONIN ARC / BONIN (= OGASAWARA) ISLANDS / HAHA-JIMA	26.7013	142.16	s_10093005-1 [24514]	ANDESITE [24514]	40.6543	-73.6125	49.099	0.642	14.944			8.26	11.603	9.168	0.164	0.192	1.905	0.105		66.643	0.721005	1221.39	0.94484	1556.59	1.18385			28.7311	1.91735	1.48322				3848.79	242.387	578.142		151.331				1.65068	288.923	17.3722	41.9991	1.34776	0.0919867
[24514]	IZU-BONIN ARC	IZU-BONIN ARC / BONIN (= OGASAWARA) ISLANDS / HAHA-JIMA	26.7009	142.16	s_10093005-5 [24514]	ANDESITE [24514]	40.6543	-73.6125	50.462	0.627	15.683			8.21	11.786	8.602	0.161	0.306	2.027	0.095		65.3493	0.729414	1215.15	0.91281	1478.05	1.12602			38.8781	1.92719	1.549				3758.87	257.836	359.792		131.111				4.70725	245.257	17.9181	42.8263	1.27139	0.100337
[24514]	IZU-BONIN ARC	IZU-BONIN ARC / BONIN (= OGASAWARA) ISLANDS / HAHA-JIMA	26.7076	142.148	s_10093001-5 [24514]	ANDESITE [24514]	40.6543	-73.6125	50.989	0.697	16.386			7.63	12.476	7.326	0.141	0.358	2.174	0.077		63.3469	0.802481	1199.9	0.839638	1380.56	1.05195			37.732	1.56853	1.72022				4178.51	267.363	387.265		68.9847				5.49679	210.35	18.2109	35.6929	1.11861	0.0831896
[24514]	IZU-BONIN ARC	IZU-BONIN ARC / BONIN (= OGASAWARA) ISLANDS / HAHA-JIMA	26.7062	142.151	s_10093003-3 [24514]	ANDESITE [24514]	40.6543	-73.6125	51.315	0.674	16.518			7.71	12.2	7.055	0.138	0.318	1.989	0.065		62.2225	0.640078	1200.69	0.793046	1364.48	1.01791			26.794	1.43526	1.59803				4040.63	276.294	284.08		50.5731				3.82196	191.671	18.0113	40.0648	1.14304	0.139917
[24514]	IZU-BONIN ARC	IZU-BONIN ARC / BONIN (= OGASAWARA) ISLANDS / HAHA-JIMA	26.6737	142.155	s_13032708 [24514]	ANDESITE [24514]	40.6543	-73.6125	50.813	0.637	15.483			8.53	11.485	8.934	0.16	0.326	1.819	0.065		65.341	0.588894	1221.43	0.906607	1506.6	1.13613			35.5959	1.43288	1.50194				3818.82	277.483	446.912		119.953				3.82924	192.592	16.4283	35.0885	0.759062	0.0906641
[24514]	IZU-BONIN ARC	IZU-BONIN ARC / BONIN (= OGASAWARA) ISLANDS / HAHA-JIMA	26.6158	142.181	s_05121804 [24514]	ANDESITE [24514]	41.6545	-74.2194	52.2352	0.582	14.5365			8.23	10.589	8.2938	0.1605	0.3131	2.0681	0.0808		64.4628	0.613968	1208.14	0.739262	1432.44	1.08675			21.6621	1.15558	1.52129				3489.09	242.501	642.677						4.01379	162.153	17.5023	35.4156	1.0191	0.16358
[24514]	IZU-BONIN ARC	IZU-BONIN ARC / BONIN (= OGASAWARA) ISLANDS / HAHA-JIMA	26.6161	142.181	s_13032506 [24514]	ANDESITE [24514]	41.6545	-74.2194	51.874	0.578	14.758			8.14	10.31	9.064	0.156	0.143	2.139	0.074		66.7146	0.586829	1203.94	0.744539	1432.14	1.10639			22.0708	1.25552	1.52021				3465.11	227.788	670.608		156.183				2.87349	149.891	16.882	35.9292	0.888251	0.0635462
[24514]	IZU-BONIN ARC	IZU-BONIN ARC / BONIN (= OGASAWARA) ISLANDS / HAHA-JIMA	26.6117	142.175	s_07032832-3 [24514]	ANDESITE [24514]	41.6545	-74.2194	48.8875	0.7554	15.2472			7.97	11.2937	8.5367	0.1867	0.2801	2.3143	0.2651		65.8468	1.14325	1215.3	0.978271	1488.11	1.14195			17.309	2.40677	1.62893				4528.62	268.93	460.44		162.159				2.26053	233.81	18.9586	59.7025	1.85221	0.0399967
[24514]	IZU-BONIN ARC	IZU-BONIN ARC / BONIN (= OGASAWARA) ISLANDS / HAHA-JIMA	26.6096	142.174	s_07032834-1 [24514]	ANDESITE [24514]	41.6545	-74.2194	51.6037	0.7246	15.3656			8.31	10.3834	8.4969	0.1549	0.3626	2.3151	0.0943		64.7947	0.833371	1212.35	0.861136	1422.57	1.08226			29.0182	2.39102	1.63103				4343.98	223.913	473.129		110.439				11.7281	233.725	30.1687	56.6818	1.54511	0.351149
[24514]	IZU-BONIN ARC	IZU-BONIN ARC / BONIN (= OGASAWARA) ISLANDS / HAHA-JIMA	26.5989	142.128	s_05121701 [24514]	ANDESITE [24514]	41.6545	-74.2194	48.6176	0.4728	14.4891			8.43	10.4899	10.8668	0.1489	0.1454	1.6459	0.0616		69.8824	0.571197	1225.86	0.950648	1574.97	1.24415			13.9099	1.32078	1.52476				2834.44	258.687	575.643		256.622				2.86257	162.648	12.8367	25.991	0.668716	0.0916053
[24514]	IZU-BONIN ARC	IZU-BONIN ARC / BONIN (= OGASAWARA) ISLANDS / HAHA-JIMA	26.6002	142.128	s_10092701 [24514]	ANDESITE [24514]	41.6545	-74.2194	47.4404	0.682531	16.911			7.53	12.6616	6.87572	0.122997	0.619016	2.1101	0.0907353		62.1728	1.67733	1215.36	1.07606	1394.83	1.06188			55.3471	2.03659	1.57056				4091.77	246.679	219.834		84.9358				6.50301	277.092	17.5968	37.916	0.93733	0.274339
[24514]	IZU-BONIN ARC	IZU-BONIN ARC / BONIN (= OGASAWARA) ISLANDS / HAHA-JIMA	26.6005	142.127	s_10092704-1 [24514]	ANDESITE [24514]	41.6545	-74.2194	46.7589	0.689588	16.1327			7.67	13.4016	6.75474	0.129046	0.690596	2.15446	0.110899		61.3184	2.15337	1226.04	1.15816	1490.3	1.12407			60.5316	2.53633	1.66898				4134.08	255.183	250.651		108.652				6.37279	291.14	17.9225	40.5282	0.961515	0.394668
[24514]	IZU-BONIN ARC	IZU-BONIN ARC / BONIN (= OGASAWARA) ISLANDS / HAHA-JIMA	26.6005	142.127	s_10092704-2 [24514]	ANDESITE [24514]	41.6545	-74.2194	47.5604	0.727899	16.8788			7.34	11.9962	6.92411	0.135095	0.821658	2.39239	0.108882		62.9357	2.26516	1208.37	1.09033	1323.58	1.04861			65.5628	2.51758	1.5735				4363.75	247.039	200.18		75.0967				11.0254	285.205	19.2987	43.557	1.08958	0.790637
[24514]	IZU-BONIN ARC	IZU-BONIN ARC / BONIN (= OGASAWARA) ISLANDS / HAHA-JIMA	26.6022	142.126	s_10092707-2 [24514]	ANDESITE [24514]	41.6545	-74.2194	47.133	0.751087	16.6822			7.91	11.7079	7.16708	0.135095	0.705719	2.11816	0.106866		61.9908	1.92945	1226.76	1.15132	1414.5	1.06618			57.6025	2.46577	1.60653				4502.76	247.53	167.963		76.1437				9.48162	286.984	19.1125	44.7269	1.08269	0.454486
[24514]	IZU-BONIN ARC	IZU-BONIN ARC / BONIN (= OGASAWARA) ISLANDS / HAHA-JIMA	26.6019	142.127	s_10092710 [24514]	ANDESITE [24514]	41.6545	-74.2194	48.813	0.535	15.424			8.1	10.481	9.841	0.163	0.176	1.922	0.168		68.6214	0.7572	1213.95	0.929142	1468.46	1.15856			12.851	1.30555	1.48403				3207.33	238.816	450.485		167.587				1.59556	186.652	15.3487	29.6388	0.701582	0.0490565
[24514]	IZU-BONIN ARC	IZU-BONIN ARC / BONIN (= OGASAWARA) ISLANDS / HAHA-JIMA	26.6017	142.127	s_10092711 [24514]	ANDESITE [24514]	41.6545	-74.2194	49.172	0.473	14.728			8	10.545	10.385	0.164	0.154	1.781	0.174		70.0296	0.606647	1209.92	0.859419	1484.94	1.19809			15.0846	1.27658	1.44918				2835.63	302.042	727.979		201.416				1.73039	185.545	14.4321	25.9681	0.561172	0.0569345
[truncated: 1,581 more rows]
[truncated: 26 more columns]
