# Supplementary material for: Latitude-dependent oxygen fugacity in arc magmas
Source: Nat Commun. 2024 Jul 18;15:6050. doi: 10.1038/s41467-024-50337-6 (PMC11258285; doi:10.1038/s41467-024-50337-6)
Supplement: Supplementary file 6 — Supplementary Data 3 [file 41467_2024_50337_MOESM6_ESM.xlsx]

## Sheet: Sheet1
Supplementary Table 3. Compiled data of burial flux of carbonate on seafloor in neritic zone.
Latitude (°)	Carbonate-poor shelves		Carbonate-rich shelves		Coral reefs		Bays		Summmary
	Average burial flux (g/m2/yr)	se	Average burial flux (g/m2/yr)	se	Average burial flux (g/m2/yr)	se	Average burial flux (g/m2/yr)	se	Average burial flux (g/m2/yr)	se
89.5
88.5
87.5
86.5
85.5
84.5
83.5	0.54108	0.42631							0.54108	0.42631
82.5
81.5
80.5
79.5
78.5
77.5
76.5
75.5
74.5
73.5
72.5
71.5
70.5
69.5
68.5
67.5
66.5
65.5
64.5
63.5
62.5
61.5
60.5
59.5
58.5							0.00265086	0.00181605	0.00265086	0.00181605
57.5							0.0109611	0.0060309	0.0109611	0.0060309
56.5
55.5
54.5
53.5
52.5
51.5
50.5
49.5							0.069032	0.001777	0.069032	0.001777
48.5							0.0174155	0.0001695	0.0174155	0.0001695
47.5							0.0201899	0.0039338	0.0201899	0.0039338
46.5			27.784				0.0185253	0.00749126	5.57162	5.5531
45.5			0.24947				0.473483	0.299678	0.458549	0.279384
44.5			19.3962	4.2859			6.44953	2.33451	9.37297	2.24524
43.5			2.73974	1.52581			1.82012	0.833412	1.94697	0.742449
42.5			7.62547	4.41409			1.69206	1.03834	2.57108	1.13184
41.5			16.1425	9.57128			5.13703	2.69639	7.05103	2.8067
40.5			15.9418	7.15257			7.32473	2.61268	9.10758	2.56495
39.5			15.3833	5.95558			9.48039	3.13881	10.8858	2.76312
38.5			17.8438	2.96037			6.51167	1.82505	9.17807	1.75135
37.5	0.701725	0.070575	11.6547	6.74975			8.87371	3.77864	8.98525	3.03942
36.5	1.17599	0.350443	8.49033	4.76806			5.51415	2.76933	5.41116	1.99001
35.5			5.83625	2.82127			1.32558	0.827174	2.03779	0.877546
34.5	2.633		2.88432	2.88068			1.10551	0.548829	1.34766	0.525987
33.5	0.73796		0.14528	0.13782			0.25352	0.0763938	0.266918	0.0703358
32.5			3.4373	3.10833	67.373	57.347	0.204832	0.0553957	9.611	7.75418
31.5	1.3892				0.57874	0.06167	0.191692	0.0811781	0.343354	0.114223
30.5			10.7459	9.7289	2.94707	0.640005	5.38151	2.09884	5.74775	1.91259
29.5	0.67645		1.3594	0.3337	12.8531	3.7373	8.87285	3.34533	8.62105	2.62139
28.5			10.4127	3.35421	22.9289	11.7719	18.2641	4.4925	16.8252	3.29819
27.5			13.8027	7.43333	15.3575	5.50413	17.7837	4.02321	16.3132	2.99522
26.5			22.9187	6.31276	29.0764	8.83188	15.8316	3.58493	21.5836	3.53219
25.5	0.23637		32.9233	10.8646	35.068	9.82585	25.8737	7.24074	30.1087	5.08725
24.5	6.1752		26.6395	8.69083	32.969	7.58694	34.3343	8.31772	31.2842	4.68197
23.5	4.392		22.5122	9.16738	34.5714	8.81122	29.2931	6.00297	28.8967	4.30949
22.5			21.2571	6.4647	32.3296	9.46019	27.1401	4.3719	26.8841	3.69113
21.5	5.7464		32.3366	6.90356	24.4296	6.77354	26.324	4.8598	27.2959	3.43405
20.5			19.9941	6.88329	29.5997	13.2131	27.0776	4.86532	26.116	5.1387
19.5	0.89746		25.8706	7.78125	21.9756	7.0501	30.4259	6.00532	26.1929	3.9024
18.5	4.2908	0.682814	26.1265	5.43361	25.4435	5.38773	26.9599	4.60909	25.6246	2.86192
17.5	6.635		20.3473	6.92753	23.7743	7.08825	17.7596	4.76919	20.0442	3.42883
16.5	3.52225	1.33875	32.0105	8.65391	41.2635	11.1648	28.7214	6.51699	33.7068	5.34291
15.5			12.1916	4.34117	35.2861	10.7667	25.64	4.50635	24.5112	3.99694
14.5			31.1167	8.99056	33.4191	11.0147	30.9041	7.31822	31.7934	5.18731
13.5			32.5549	7.16643	28.2956	7.90023	24.5095	4.9875	27.596	3.63065
12.5			16.7079	2.67354	36.4967	8.37391	15.6528	3.08368	23.3095	3.36307
11.5			22.7846	12.3593	51.1566	11.0869	11.5552	2.48705	29.5881	5.88188
10.5	1.79631	1.54269	21.1072	5.7117	39.8678	9.42564	15.2396	3.28407	25.3015	3.96556
9.5			18.1987	5.08517	28.4838	5.52917	25.6182	6.88885	24.3102	3.344
8.5			14.2169	2.64029	40.4578	10.3981	20.2468	5.4936	25.5481	4.31605
7.5	0.4573		13.1172	3.06131	53.3224	12.6024	16.0441	2.86155	27.7815	4.87929
6.5	2.48005	1.09795	19.6425	3.6611	26.7999	6.46866	22.5748	3.92702	22.8168	2.93933
5.5	2.8292	0.8906	22.4173	6.5918	42.0922	16.4181	26.5449	6.41305	29.6641	6.22343
4.5	2.60986	0.504105	25.6833	9.18883	52.3826	16.3065	42.6167	10.4745	35.3004	6.57374
3.5	0.4843		32.6833	10.5366	42.5691	13.6259	25.5675	9.42039	33.8304	6.72898
2.5	1.3616		16.8071	3.78791	39.1276	13.8741	11.6696	2.72742	25.9673	6.92132
1.5			12.9895	3.43854	34.3384	8.43277	14.807	2.62234	22.1859	3.88924
0.5			13.8268	4.45124	37.041	11.1751	8.43283	2.70149	23.0455	5.45547
-0.5			25.2325	7.047	36.8425	7.11138	22.8145	8.68829	31.205	4.66232
-1.5			22.2117	3.94869	40.0867	7.4886	18.4609	4.16203	30.4928	4.13886
-2.5	1.7613		19.5087	5.80732	34.1388	8.56501	14.9792	4.14771	25.1164	4.56613
-3.5			9.01841	2.61483	13.4721	2.97282	13.9639	3.41624	12.0381	1.75473
-4.5			21.1037	5.19314	32.047	7.47118	13.4899	2.91263	24.0838	3.77132
-5.5			20.612	5.24172	47.2019	9.52042	24.2882	8.55975	33.9293	5.25361
-6.5			17.6573	3.48569	49.1975	11.9392	17.0108	4.41184	31.669	5.80413
-7.5			14.0662	2.94055	38.619	9.61327	12.8058	3.58989	25.2773	4.8309
-8.5			9.53438	1.69277	35.9033	7.41964	8.32836	1.62797	20.2052	3.42181
-9.5	2.29		21.5246	5.60178	44.0626	10.3225	24.1063	7.32735	29.8612	4.66981
-10.5			26.2969	7.07234	55.9449	15.6796	28.9549	8.44325	38.5578	7.03314
-11.5	0.69058	0.23817	20.7666	4.4833	82.1992	35.1626	23.0484	6.88357	43.9698	13.6416
-12.5	0.13373		23.9797	7.71769	41.9057	18.6079	27.3674	7.33905	31.0518	7.26128
-13.5			22.632	5.48291	47.9347	13.8557	21.3846	4.57556	31.7687	5.80308
-14.5	2.77811	1.93569	14.5466	4.22083	33.8829	14.0443	21.2003	4.95824	23.3276	5.52113
-15.5	1.7195		16.3969	3.43906	36.1877	9.86116	17.3538	3.26745	24.5156	4.3639
-16.5			13.0681	2.58961	40.4094	8.65811	11.6877	3.09141	24.2594	4.07264
-17.5	4.0988	1.4167	11.4959	3.2303	51.5444	13.1181	13.0146	2.75251	26.4928	5.42951
-18.5	1.80356	1.56944	11.3558	3.1279	50.1532	12.6299	14.3154	4.97861	28.1431	5.98962
-19.5	0.28252		12.545	4.27323	61.1006	19.9474	16.585	6.32994	33.2714	8.92879
-20.5			16.038	5.96512	53.6115	18.9516	23.1233	9.8997	34.6787	9.32629
-21.5			9.70615	2.55912	42.834	15.5551	13.3714	3.53113	24.2683	6.75803
-22.5	5.8584		14.5815	6.56544	22.2113	6.69409	9.90048	4.05902	16.1215	3.50751
-23.5			9.5167	3.65809	26.1748	8.20265	3.67737	1.08074	14.0778	3.89504
-24.5	1.399		13.2956	6.40365	4.31565	1.85899	17.425	5.3473	11.6661	2.85846
-25.5			16.3523	5.94859	5.94496	3.47335	31.8523	8.64846	21.3139	4.78289
-26.5			48.0326	11.7781	0.0663607	0.0648768	36.5402	10.2698	33.0762	7.4564
-27.5			8.65994	4.81544	3.00273	2.34455	15.4867	2.20911	10.5052	2.24896
-28.5			2.46685	0.59715	28.2926	28.2924	9.1044	4.00954	11.3863	5.26053
-29.5			2.39107	1.58698	12.196		21.7179	9.99233	12.0747	5.28812
-30.5			43.4725	0.0535			18.1104	10.673	25.3567	8.72483
-31.5			8.33439	3.02936	1.11054	1.09656	10.3595	2.60129	8.93893	1.87176
-32.5			7.99999	6.50842			8.64796	1.88767	8.5139	1.94626
-33.5			10.7426	9.99192			15.8943	5.75246	14.7054	4.91343
-34.5			16.396	7.92777			14.9939	6.10109	15.429	4.79663
-35.5			1.0067	0.425644			10.1959	3.14844	6.95263	2.2878
-36.5			0.208494	0.208026			6.3107	3.06734	4.95466	2.50879
-37.5			4.41317	2.01446			4.46	1.32495	4.44439	1.07478
-38.5							4.14274	1.34666	4.14274	1.34666
-39.5							6.17879	1.92885	6.17879	1.92885
-40.5							5.14935	1.99263	5.14935	1.99263
-41.5			0.66953				1.89995	0.374462	1.69488	0.368151
-42.5			3.3503				2.02322	0.638461	2.28864	0.561271
-43.5			0.182543	0.182497			1.28234	0.32186	0.915739	0.312115
-44.5
-45.5
-46.5
-47.5
-48.5
-49.5
-50.5
-51.5
-52.5
-53.5
-54.5
-55.5
-56.5
-57.5
-58.5
-59.5
-60.5
-61.5
-62.5
-63.5
-64.5
-65.5
-66.5
-67.5
-68.5
-69.5
-70.5
-71.5
-72.5
-73.5
-74.5
-75.5
-76.5
-77.5
-78.5
-79.5
-80.5
-81.5
-82.5
-83.5
-84.5
-85.5
-86.5
-87.5
-88.5
-89.5
The origional data are from O’Mara and Dunne (2019).
se: standard error.
References:
O’Mara, N. A. & Dunne, J. P. Hot Spots of Carbon and Alkalinity Cycling in the Coastal Oceans. Sci Rep 9, 4434 (2019).
