# Supplementary material for: Latitude-dependent oxygen fugacity in arc magmas
Source: Nat Commun. 2024 Jul 18;15:6050. doi: 10.1038/s41467-024-50337-6 (PMC11258285; doi:10.1038/s41467-024-50337-6)
Supplement: Supplementary file 7 — Supplementary Data 4 [file 41467_2024_50337_MOESM7_ESM.xlsx]

## Sheet: Sheet1
Supplementary Table 4. Compiled geochemical data of global mid-ocecan ridge basalt.
REFERENCES	SAMPLE NAME	MATERIAL	SEGMENT	LONGITUDE	LATITUDE	SIO2(WT%)	TIO2(WT%)	FEO(WT%)	MGO(WT%)	AL2O3(WT%)	CAO(WT%)	NA2O(WT%)	K2O(WT%)	P2O5(WT%)	MNO(WT%)	Mg#*	TEMPERATURE (°C)‡	PRESSURE (GPa)‡	SCSS§	NBO/T¶	TI(PPM)	BA(PPM)	BE(PPM)	CE(PPM)	CO(PPM)	CR(PPM)	CS(PPM)	CU(PPM)	DY(PPM)	ER(PPM)	EU(PPM)	GA(PPM)	GD(PPM)	HF(PPM)	HO(PPM)	LA(PPM)	LI(PPM)	LU(PPM)	NB(PPM)	ND(PPM)	NI(PPM)	PB(PPM)	PR(PPM)	RB(PPM)	SC(PPM)	SM(PPM)	SR(PPM)	TA(PPM)	TB(PPB)
EISSEN, 1991; EISSEN, 1994	KAIYO88-003-006	WR	FIJI6	174.148	-21.0363	49.0282	2.29132	9.38339	9.11524	15.3588	10.1258	3.04175	0.410236	0.250144	0.180104	63.6173	1359.02	1.50149	1464	0.807553	13736.5	60			41	226		51	5.8	3.5	1.65					10			10	19	182			7.2			253
EISSEN, 1991; NOHARA, 1994	KAIYO88-003-001	WR	FIJI6	174.148	-21.0363	48.8096	2.27443	9.41069	9.05745	15.4983	10.2249	3.03928	0.422681	0.251596	0.181149	63.4026	1360.95	1.53766	1464.56	0.807194	13635.2	54		22.52	41	293		51	5.32	3.26	1.5		5.4	3.4	1.15	8.68		0.45	9.67	15.37	178		3.2	6.7		4.24	222		0.88
EISSEN, 1994; NOHARA, 1994	YOK0090-DT8/9-007	WR	FIJI2	173.545	-16.305	49.2225	2.20756	8.27833	9.09871	15.5623	9.54618	3.10251	0.894955	0.387814	0.149159	66.4247	1310.76	1.26099	1216.04	0.763075	13234.3	195		32.25	37	325			4.13	2.08	1.34		4.41	4.49	0.91	14.28		0.28	22.06	17.52	217		3.86	21	30	4.08	265		0.71
Gale et al., this study	VEM0033-1-001-002	GL	SEIR69	131.005	-50.408	48.8012	2.07853	9.93713	9.01137	15.3828	10.2855	3.08272	0.300284	0.290275	0.180171	62.0105	1384.17	1.67791	1553.53	0.822967	12460.8	24.564	1.35	22.982	43.4	310	0.02652	53	6.46	4.04087	1.653	18.87	5.36424	4.15	1.342	8.127	6.53	0.556	6.552	17.052	157		3.477	2.62	35.8	4.91	233	0.44	1.013
EISSEN, 1991; EISSEN, 1994	KAIYO88-003-028	WR	FIJI6	174.148	-21.0363	49.1975	1.9899	9.22454	9.31953	15.3792	10.4395	2.82986	0.39998	0.249987	0.169991	64.5206	1351.45	1.40228	1440.9	0.813672	11929.5	70			41	231		54	5.4	3.1	1.4					8.8			8.6	16	184			6.6			246
EISSEN, 1994; NOHARA, 1994	NADSTM1-002-009	WR	FIJI3	173.92	-17	48.8	1.97	7.056	8.18	17.02	10.7	2.86	0.74	0.3	0.13	67.6033	1262.39	0.99869	1047.4	0.680393	11810.1	169		27	35	212			3.7	2.05	1.34		4	2.68	0.73	12.35		0.27	22.64	14.87	148		3.33	19	27.2	3.58	255		0.65
KLEIN, 1991	VEM0033-1-001-001	WR	SEIR69	131.005	-50.408	48.44	1.96	9.765	8.53	15.42	10.14	3.05	0.321	0.283	0.173	61.125	1379.98	1.62965	1514.69	0.794874	11750.2	23.9		22.63		307		59.1	6.44	3.92	1.71		5.79			8.07		0.562		16.26	155				35.9	4.76	235
DAVIS, 2008	WFL2002-455-R7	WR	JUAN15	-126.883	42.503	50.0282	1.90141	9.38941	8.72131	15.0066	11.1239	2.72427	0.209956	0.209956	0.169965	62.5738	1355.33	1.30528	1510.19	0.808301	11399	25.1		15.85		313	0.02	54	7.04	4.32	1.5	19	6.19	3.56	1.51	5.79		0.67	5.23	13.6	145	0.56	2.61	2.42	41.8	4.68	125.6	0.35	1.08
EISSEN, 1991; EISSEN, 1994	KAIYO87-4DTA-004	WR	FIJI3	173.922	-16.972	49.8566	1.87213	8.17228	8.07917	15.9181	10.7022	2.76314	0.770875	0.350398	0.160182	64.0222	1305.31	1.11647	1204.94	0.722609	11223.4	199			31	215		57	4.9	2.6	1.46					18.2			22.5	20.2	157			17			260
EISSEN, 1991; EISSEN, 1994	KAIYO87-4DTA-003	WR	FIJI3	173.922	-16.972	49	1.85	7.38	8.13	16.55	10.64	2.31	0.76	0.35	0.2	66.4759	1274.77	0.932371	1084.28	0.68052	11090.8	180			32	213		57	5	2.3	1.43					17.6			23.6	21.2	159			16			260
Jenner and O'Neill, 2012	MELVULC-5-030-001	GL	AARR4	-7.01	-57.47	49.7977	1.79176	9.62573	8.07926	15.7628	10.323	3.35856	0.248995	0.258954		60.1722	1366.21	1.49419	1461.54	0.75883	10741.6	60.6983	0.735449	17.818	43.5784	320.281	0.0436787	60.767	5.61999	3.36684	1.51249	18.0713	5.11313	3.12942	1.21271	6.57916	6.32361	0.469937	7.72278	13.2865	152.265	0.692524	2.67676	3.97245	35.8	4.25904	189.583	0.434666	0.858647
LE ROUX, 2000; LE ROUX, 2001	EWI9309-033-009	GL	MARR236	-14.077	-45.99	49.661	1.77148	9.42253	8.04214	15.038	10.332	3.25567	0.705477	0.327898	0.178853	60.5725	1359.73	1.49326	1404.82	0.781795	10620	161		23					5.53	3.2	1.46		5.19			11.7			16.6	14.5	115	1.04		13.7	37	4.19	239	1.02
Gale et al., this study	POL0059-266-030	GL	GAKK11	38.655	86.32	49.7809	1.74603	8.94857	8.09872	15.9478	10.2456	3.50407	0.438318	0.261463		61.9635	1338.23	1.37404	1334.5	0.742917	10467.4	84.1821	0.806564	20.694	39.3113	298.732	0.082829	65.1441	5.8553	3.55174	1.43223	17.0109	5.59152	3.36128	1.24091	8.35743	6.65584	0.518531	11.8612	14.8941	134.479	0.814675	3.08276	7.27397	34.893	4.26852	196.733	0.656558	0.933348
LE ROUX, 2000	EWI9309-033-006	GL	MARR236	-14.077	-45.99	49.7593	1.74212	9.4169	8.10695	15.082	10.2568	3.21791	0.705747	0.288263	0.159042	60.7783	1358.53	1.47165	1396.42	0.778558	10444	160		23					5.53	3.1	1.49		5.46			12.1			16.1	15.3	113	1.28		14.1	37	4.39	238	1.01
LE ROUX, 2000; LE ROUX, 2001	EWI9309-033-007	GL	MARR236	-14.077	-45.99	49.84	1.73869	9.54636	8.10597	15.0327	9.98153	3.25127	0.729921	0.295914	0.167685	60.4494	1363.46	1.49914	1399.83	0.77499	10423.4	152		23					5.44	2.72	1.6		4.6			11.7			15.6	14.8	114	1.12		13.5	37	4.33	235	0.94
LE ROUX, 2000	EWI9309-033-008	GL	MARR236	-14.077	-45.99	49.3153	1.72698	9.54566	8.22655	15.2471	10.2363	3.21811	0.703658	0.327052	0.188303	60.8037	1366.85	1.56781	1413.66	0.786353	10353.2	158		23					5.19	3.27	1.44		4.78			11.8			15.7	15.3	115	1.11		13.6	37	4.37	234	0.9
DANYUSHEVSKY, 2000	MOA8801-016-002	GL	SEIR68	127.577	-50.163	49.0625	1.72679	8.97397	8.40961	16.4144	11.1831	3.2208	0.199564	0.199564	0.10976	62.781	1343.21	1.4235	1397.31	0.76786	10352.1	8.364	0.81	17.22					5.14	3.08	1.43	17.6	4.55	3.07		5.97	5.24	0.431	4.1	13.01				0.912	33.7	3.79	227.9	0.283
LE ROUX, 2000	EWI9309-033-011	GL	MARR236	-14.077	-45.99	49.4419	1.72521	9.38764	8.14223	15.2051	10.3745	3.2335	0.72694	0.328617	0.139413	60.9559	1359.39	1.51191	1394.97	0.783815	10342.6	153		23					5.03	2.78	1.53		4.75			11.8			16.1	15	115	1.2		13.4	38	4.13	236	1.08
LE ROUX, 2000	EWI9309-033-003	GL	MARR236	-14.077	-45.99	50.3051	1.70986	9.26858	8.10438	14.9733	9.92955	3.34985	0.706495	0.245311	0.127562	61.1486	1349.33	1.38437	1359.61	0.765365	10250.6	153		23					5.14	3.02	1.44		4.82			11.6			15.3	15.1	113	1.3		13.6	36	4.05	231	0.91
INGLE, 2010	EWI0004-020-001	GL	GALA11	-92.012	2.117	48.3962	1.70364	9.56938	8.47878	15.9801	11.9552	2.68718	0.26865	0.194471	0.164398	61.4622	1373.71	1.58874	1532.29	0.817311	10213.3	75.1		20.2	46.7	259			4.91	2.87	1.33		4.79	2.77	1.03	8.5		0.452	11.8	13.6	116	0.6555	2.96	6.37	40	3.9	191	0.707	0.798
GOLDSTEIN, 2008	HLY0102-057-046	GL	GAKK8	67.54	86.56	49.2344	1.70025	8.82571	8.13101	16.8807	10.5738	3.45546	0.255993	0.207838	0.151273	62.3822	1335.29	1.41147	1316.04	0.725004	10193	23.7														5.43				12.7				2.13			206
Gale et al., this study	HLY0102-053-009	GL	GAKK10	49.2275	86.6808	48.4444	1.69566	9.01155	8.22977	16.7875	10.8032	3.74061	0.281492	0.217803	0.166432	62.1763	1348.94	1.61755	1368.18	0.760818	10165.5	46.2401	0.81671	16.3008	40.6713	298.16	0.0351248	70.1278	5.79346	3.44564	1.45937	17.0592	5.12948	3.04401	1.23944	6.10023	6.16508	0.507857	7.05647	13.1503	145.216	0.716798	2.56092	3.26768	33.3135	4.00114	182.542	0.43137	0.898501
LE ROUX, 2000	EWI9309-033-010	GL	MARR236	-14.077	-45.99	49.4829	1.6906	9.72973	8.14424	15.0658	10.1286	3.27369	0.710861	0.296192	0.197461	60.1067	1373.72	1.60209	1435.38	0.789306	10135.1	154		23					5.12	2.92	1.39		4.93			11.7			15.8	15.5	116	0.95		13.7	37	3.81	234	1
Gale et al., this study	HLY0102-053-SG	GL	GAKK10	49.2275	86.6808	48.9655	1.68987	9.02609	8.20699	16.6411	10.4957	3.71945	0.272336	0.223425	0.147826	62.0731	1345.57	1.53692	1355.64	0.748459	10130.8	45.2585	0.801869	16.4126	40.767	327.967	0.0362989	65.6264	5.86058	3.5165	1.40284	17.4594	5.3072	3.13795	1.2484	6.03281	6.68686	0.524439	7.0141	13.2781	144.026	0.683083	2.63426	3.39347	33.302	4.02842	183.099	0.420664	0.904681
Gale et al., this study	VEM0033-1-003-006	GL	SEIR70	135.09	-50.42	48.933	1.68932	9.93759	8.37737	15.4092	11.7334	3.04416	0.130262	0.180363	0.170343	60.2764	1386.88	1.66245	1614.29	0.834312	10127.5	6.03		14.56	42		0.0065		5.45	3.25	1.4		4.94	2.83	1.19	4.76		0.48	2.82	12.29	96	0.64	2.37	0.69		3.82			0.85
[13015][14498]	s 456749		MARR32	-22.53	63.9	48.5125	1.68567	10.0757	8.48179	15.1801	12.6325	2.15246	0.277249		0.125014	60.2425	1395.5	1.60886	1673.46	0.860971	10105.6	72.2		21.77	58.8966	592.52	0.0561533	140.372	3.89577	2.28974	1.25792	15.7197	3.87395	2.29753	0.835059	9.25879	4.30859	0.2981		13.7119	269.865	0.34303	3.063	4.80143	38.6236	3.55955	192.431	0.908292	0.657534
Gale et al., this study	HLY0102-057-SG	GL	GAKK8	67.5433	86.5558	49.3935	1.68437	8.86831	8.03088	16.8092	10.7238	3.35262	0.231785	0.216667	0.141674	61.9776	1335.99	1.37987	1327.73	0.723477	10097.8	24.2274	0.900458	15.9791	40.7636	287.734	0.0262551	67.2827	5.3755	3.16026	1.38468	17.674	5.01514	3.1745	1.13051	5.45482	5.81347	0.459956	5.02803	13.2787	139.164	0.677581	2.62162	1.92363	36.0992	3.87419	213.536	0.313861	0.864088
NIU, 1997	WASRAI2-091-004	GL	EPRR27	-103.852	11.787	49.625	1.68066	9.00817	8.59954	14.9929	12.3116	2.84806	0.149748	0.179698	0.179698	63.213	1343.5	1.28079	1517.87	0.838972	10075.6	15.24	0.49	12.39	44.3	307	0.016	86.9	4.88	2.89	1.31	17.2	4.39	2.411	1.04	4.02	5.48	0.41	3.42	10.58	93.4	0.433	2.05	1.32	41.3	3.39	150	0.226	0.75
Gale et al., this study	HLY0102-079-SG1	GL	GAKK10	49.6558	86.8317	49.2866	1.67597	9.51363	8.64977	16.008	10.6296	3.35632	0.142148	0.174644	0.149524	62.0717	1363.64	1.53839	1470.49	0.786902	10047.4	15.3328	0.699777	12.7167	42.7951	306.708	0.0157913	70.4559	6.20525	3.69855	1.48768	17.3533	5.25938	3.06142	1.31906	3.97414	6.38955	0.528704	3.05403	12.501	151.008	0.531979	2.22583	1.3558	36.2179	4.04368	150.779	0.199409	0.94453
Gale et al., this study	VEM0033-1-003-004	GL	SEIR70	135.09	-50.417	48.9741	1.67173	9.81293	8.40277	15.5229	11.6777	3.05806	0.131308	0.181811	0.17171	60.6506	1381.16	1.62419	1586.86	0.82682	10022	6.254	0.88	14.628	42.1	311	0.00567	76	5.464	3.38945	1.368	17.93	4.43238	2.945	1.142	4.767	5.85	0.486	2.723	12.315	100		2.355	0.59	39.3	3.848	178	0.204	0.834
LE ROUX, 2000	EWI9309-033-005	GL	MARR236	-14.077	-45.99	49.7799	1.66904	9.44527	8.01716	15.0304	10.3497	3.27065	0.698742	0.299461	0.189659	60.4406	1360.61	1.49012	1403.22	0.780986	10005.9	157		24					5.07	2.98	1.4		5.13			11.9			16.1	15.5	122	1.35		14.2	37	4.35	238	1.01
Gale et al., this study	HLY0102-007-001A	GL	GAKK16	-3.11917	83.6	50.261	1.66486	9.63476	8.0856	15.353	10.7736	3.10282	0.225608	0.179707	0.180707	60.1686	1365.02	1.41046	1485.79	0.773068	9980.84	38.795	0.659053	13.0966	42.1247	281.867	0.0482627	72.5861	5.98789	3.5848	1.36381	17.4506	5.31165	2.94675	1.28264	4.49229	6.40489	0.530048	3.80627	11.7331	118.699	0.622784	2.21849	3.35281	38.3349	3.82957	148.206	0.238495	0.911867
Gale et al., this study	HLY0102-080-038	GL	GAKK10	48.355	86.6958	49.5859	1.66448	9.31195	8.14881	16.1898	10.5895	3.41991	0.209645	0.201659	0.163324	61.1675	1354.31	1.47003	1411.14	0.753001	9978.56	26.8226	0.829715	15.1616	43.2267	349.688	0.0264904	72.9499	5.69495	3.43609	1.35919	16.5134	5.29089	3.14029	1.20358	5.18535	6.32678	0.499618	4.82207	12.8733	168.995	0.635602	2.49984	2.30153	36.4564	3.91341	174.124	0.294418	0.888961
Kelley, Kingsley, and Schilling, in revision	EWI9309-033-001	GL	MARR236	-14.08	-45.99	49.5596	1.66331	9.42418	8.06174	15.3329	10.2052	3.26919	0.736136	0.26859	0.169112	60.6265	1360.4	1.51743	1379.35	0.771669	9971.54	183		26.43	39.85	272.9	0.188	55.5	5.49	3.34	1.513	17.4	5.17	3.02	1.19	12.16	6.54	0.451	15.93	16.24	133.1	1.096	3.54	15.29	32.26	4.5	263.4	0.9496	0.91
Gale et al., this study	HLY0102-053-007	GL	GAKK10	49.2275	86.6808	48.9118	1.65461	8.8946	8.20168	16.6304	10.7481	3.69468	0.264685	0.234416	0.164945	62.4028	1341.26	1.51237	1349.91	0.752974	9919.39	44.8461	0.815536	16.2011	41.9009	331.503	0.0368716	67.2335	5.83001	3.51439	1.38843	17.0745	5.34503	3.1082	1.24045	5.94729	6.68212	0.524347	6.97796	13.1999	162.775	0.703107	2.60609	3.40042	33.0966	4.02168	180.2	0.418332	0.905964
MEURER, 2001	AII0132-1-004-001	GL	MARR122	-44.92	22.758	51.2129	1.65403	9.03816	8.05055	14.6636	11.582	2.97282	0.109735	0.16161	0.189542	61.5874	1336.47	1.11874	1468.47	0.786751	9915.91	4.8	0.85	11.99	42.6	340	0.004	79.1	6.23	3.68	1.4		5.22	2.97	1.32	3.73	6.47	0.536	2.32	11.15	86	0.474	2.07	0.46	43.7	3.89	121	0.17	0.94
BOURDON, 1996	AII0127-2-R093	GL	MARR83	-30.226	38.575	49.94	1.63	8.5	8.2	15.75	12.67	2.31				63.4566	1320.7	1.00529	1429.17	0.774516	9771.85	189																									299
Kelley, Kingsley, and Schilling, in revision	TRI0164-025-002	GL	GALA11	-91.18	1.95	48.581	1.62305	9.58483	8.39046	16.0046	11.909	2.59241	0.285654		0.12939	61.1756	1372.84	1.54495	1519.66	0.806888	9730.18	59.8		19.42	44.73	296.4	0.07	100.7	4.69	2.78	1.3	17.24	4.33	2.25	0.99	7.98	5.67	0.384	10.195	12.96	138.2	0.584	2.74	5.32	36.73	3.67	188.5	0.6528	0.739
MAHONEY, 2002;CHRISTIE, 2004	MELWEST-10-116-015	GL	SEIR46	106.494	-48.873	50.4588	1.61221	8.64127	8.08575	15.6387	11.1906	3.12754	0.300497	0.171995	0.11664	62.7461	1322.89	1.16583	1339.93	0.753113	9665.2	52.9		17.38	40.4	321.6		53.7	5.41	3.3	1.32			2.83	1.16	6.99		0.47	9.37	12.61	143.8	0.611	2.61	4.86	34.4	3.84	144.3	0.58	0.833
Gale et al., this study	KNO0115-003-001	GL	MARR116	-44.85	26.15	50.9597	1.61126	9.56851	8.06715	14.9978	11.1062	2.97849	0.0726952	0.149429	0.180728	60.2791	1358.7	1.27008	1513.43	0.777677	9659.5	6.817		10.431			0.00762		6.098	3.86096	1.356		4.95969	2.754	1.28	3.102		0.524	1.975	10.816			1.931	0.612		3.605	119.606	0.141	0.916
KLEIN, 1991	VEM0033-1-003-005	WR	SEIR70	135.09	-50.417	49.4849	1.61115	9.20439	8.39975	15.6045	11.8525	2.89751	0.160524	0.178697	0.167591	62.1591	1352.03	1.36625	1487.8	0.804356	9658.84	5.91				284		72.3													110				38		181
Arevalo et al. (2009)	RSR1979-007-060		CIRR47	63.89	3.7	50.56	1.61039	9.52	8.48	15.39	11.05	2.56	0.132947	0.12		61.5881	1357.35	1.22987	1489.68	0.774523	9654.29	7.26557		11.2653		389.092			4.41486	2.84941	1.19995		3.91255	1.83732	0.95481	3.16106		0.397389	2.23309	9.3248		0.727813	1.79954		28.8419	3.1752	110.581	0.132428	0.696808
LE ROUX, 2000	EWI9309-014-002	GL	MARR248	-7.062	-50.267	50.5027	1.6047	10.2014	8.51078	14.2143	11.0679	2.6695	0.286963	0.158324	0.148429	60.0271	1387.19	1.44059	1625.5	0.836651	9620.18	51		14.2	48	309		65	5.49	2.95	1.24		5.03			6.53			7.84	11.4	113	0.88		4.28	40	3.54	122	0.53
KLEIN, 1991	VEM0033-1-003-003	WR	SEIR70	135.09	-50.417	49.33	1.60282	9.11161	8.52707	15.5726	11.972	2.90262	0.176768	0.175764	0.164716	62.7494	1349.39	1.36627	1484.94	0.814747	9608.91	6.01				301		72.3													115				37.8		181
Kelley, Kingsley, and Schilling, in revision	END0061-022-001	GL	MARR191	-12.84	-18.38	51.0058	1.60113	8.95629	8.00563	14.9805	11.8884	2.57181	0.120084	0.340239	0.150105	61.6703	1333.72	1.05477	1450.89	0.773861	9598.77	21.98		10.74	42.95	313.1	0.029	72.38	5.38	3.41	1.16	15.44	4.11	2.04	1.181	3.57		0.473	4.265	9.24	123.7	0.369	1.78	1.5	38.78	3.25	117.2	0.2706	0.804
Kelley, Kingsley, and Schilling, in revision	END0061-019-001	GL	MARR190	-14.32	-16.82	50.9882	1.60088	9.14505	8.12449	15.1083	11.3062	2.67148	0.170094	0.29016	0.140077	61.5255	1340.69	1.12072	1440.99	0.765515	9597.28	33.9		12.96	46	318	0.043	77.7	5.65	3.59	1.246	16.22	4.42	2.31	1.247	4.57	4.11	0.494	6.36	10.5	149.2	0.443	2.05	2.94	39.11	3.58	131.5	0.4098	0.859
Arevalo et al. (2009)	RSR1979-006-009-VG5262	GL	CIRR47	63.87	3.78	50.4888	1.59546	9.49517	8.33173	15.3777	11.1233	2.83025	0.10078	0.131013		61.232	1356.85	1.27311	1495.14	0.777989	9564.78	6.57022		11.2966		297.845			5.17345	3.40543	1.28567		4.48835	2.29056	1.12894	3.23903		0.461324	1.9059	10.1516		0.812825	1.8712		33.4426	3.44226	118.093	0.122385	0.802001
KLEIN, 1991	VEM0033-1-003-009	WR	SEIR70	135.09	-50.417	49.441	1.59502	9.10839	8.60137	15.4515	11.881	2.83694	0.218304	0.175045	0.165991	62.9603	1348.33	1.34122	1478.49	0.81644	9562.14	6.29				304		71.4													119				37.8		180
Gale et al., this study	POL0059-270-016	GL	GAKK10	49.8425	86.7425	49.5251	1.59423	8.34909	8.40975	16.5972	10.5761	3.22783	0.447354	0.230588	0.167944	64.4517	1312.98	1.23981	1234.75	0.72794	9557.41	62.0898	0.891364	18.3447	40.5449	339.109	0.0619593	64.2469	4.89363	2.82858	1.28789	16.496	4.64775	2.89812	1.02156	7.36978	5.55443	0.423191	10.0409	13.0834	173.709	0.81	2.73398	4.85112	32.9528	3.63468	232.557	0.592297	0.772185
WHITE, 1993; AREVALO JR, 2009	RSR1979-007-060	GL	CIRR47	63.89	3.7	50.2956	1.59303	9.63201	8.78325	15.3249	10.9259	2.67202	0.109975	0.119972		62.1411	1362.4	1.2971	1515.92	0.794344	9550.21															3.31						0.526				3.46
Kelley, Kingsley, and Schilling, in revision	EWI9309-014-004	GL	MARR248	-7.06	-50.267	50.4004	1.59182	9.94292	8.56928	14.3828	11.1569	2.7594	0.278302	0.15903	0.139151	60.8047	1376.87	1.40133	1588.58	0.833938	9542.96	61.5		17.74	42.89	288.6	0.061	67.2	5.89	3.63	1.339	18.37	4.97	2.66	1.27	6.93	6.19	0.501	8	12.7	127.4	0.571	2.57	4.83	37.69	3.99	144.3	0.5038	0.919
BOURDON, 1996	AII0127-2-029-002	GL	MARR83	-29.8455	39.432	49.49	1.59	8.46	8.31	15.92	13.13	2.11				63.8739	1321.02	1.00857	1444.09	0.787001	9532.05	191																									295
MAHONEY, 1992; JANNEY, 2005	AGU0022-001-001	WR	SWIR13	16.91	-52.293	49.4609	1.58397	9.99363	9.62682	14.7522	11.0554	2.72684	0.120101	0.140118	0.160135	63.4226	1383.64	1.52146	1630.68	0.874985	9495.9	14.5		11.3	51	394	0.02	65	5.01	2.94	1.26		4.37	2.54	1.04	3.69		0.41	3.28	10.1	188	0.4	1.9	1.58	39	3.42	129		0.75
REYNOLDS, 1997	KNO0115-020	GL	MARR121	-44.983	23.135	50.1582	1.5831	9.73907	8.14595	15.2899	11.1118	3.066	0.142279	0.169332	0.181355	60.0887	1369.81	1.43434	1528.61	0.789416	9490.68	7.5		12.6		250		62	5.99	3.74	1.41		5.06			3.95		0.56		11.11	113				38.5	3.81	145
Sun et al., 2008	MD2	GL	SWIR50	57.842	-31.693	48.1254	1.581	10.448	8.82733	15.4231	10.424	2.9457	0.064	0.101518		60.3299	1411.08	1.80925	1654.5	0.830374	9478.09	4.39011		9.9925					4.89464	3.00834	1.23977	19.0979	4.05892	2.26303		2.72296	6.19853	0.433069	1.43804	9.25784		0.572201		0.407696	34.0737	3.18528	135.863	0.100522
CHRISTIE, 2004	MELWEST-10-115-008	GL	SEIR45	105.868	-49.229	50.3173	1.57965	8.57879	8.29862	15.5471	11.2354	3.205	0.29606	0.169887	0.12518	63.5198	1321.26	1.17979	1343.68	0.768652	9470	28.1		12.66	40	328.1		59.9	4.96	3.2	1.09			2.55	1.04	4.67		0.487	4.76	10.07	95.2	0.607	2.03	2.44	37	3.27	113.2	0.374	0.721
Gale et al., 2011	AII0127-2-030	GL	MARR83	-30.096	38.754	49.5143	1.5743	7.83587	8.28242	14.9084	12.7043	2.64364	0.763389	0.274266	0.142578	65.5479	1297.23	1.053	1287.03	0.817871	9437.93	189.631		27.787			0.194		3.684	2.04008	1.303		3.73116	2.745	0.743	13.353		0.278	25.535	15.752			3.589	11.853		3.853		1.504	0.647
MEURER, 2001	AII0132-1-006-001	GL	MARR122	-44.937	22.807	50.9635	1.57137	8.67923	8.26024	15.0707	11.692	2.93298	0.119714	0.15064	0.17957	63.1419	1322.74	1.06647	1405.73	0.779987	9420.36	5.1	0.69	11.05	41.9	299		72.7	5.84	3.46	1.31		4.84	2.72	1.24	3.48	7.23	0.507	2.36	10.27	102	0.448	1.91	0.47	40.2	3.54	120	0.17	0.87
Gale et al., this study	MOA8801-016-012	GL	SEIR68	127.577	-50.163	48.85	1.57	8.73	8.24	16.48	11.03	3.03	0.2	0.23	0.16	62.9488	1334.83	1.32701	1348.33	0.744441	9412.15	11.47	1.15	16.96	39.2	287	0.01013	63.3	5.284	3.21057	1.375	17.38	4.64256	3.254	1.126	6.033		0.449	4.212	13.096	120.8	0.612	2.634	0.901	37.1	3.769	227.027	0.296	0.829
Gale et al., this study	RSR1979-006-009-VG5261	GL	CIRR47	63.87	3.78	50.805	1.55769	9.48315	8.28282	15.2807	10.9733	2.87246	0.0996883	0.119626		61.1222	1354.87	1.23902	1483.54	0.771456	9338.35	9.5		11.34	41	297	0.0081	70	5.89	3.72	1.34		5.27	2.83	1.28	3.59		0.52	2.21	10.88	121		1.97	0.71	37.79	3.55	123.9	0.16	0.91
LE ROUX, 2000	EWI9309-014-003	GL	MARR248	-7.062	-50.267	50.4732	1.55761	10.2389	8.57711	14.2012	11.048	2.67421	0.28747	0.158604	0.148691	60.1253	1388.99	1.45522	1630.02	0.840827	9337.87	51		14.7					5.37	2.89	1.26		4.62			6.62			7.74	11.3	118	0.63		4.38	40	3.59	123	0.45
Gale et al., this study	POL0059-274-060	GL	GAKK8	66.8667	86.7258	50.1708	1.551	9.11563	8.2181	15.7953	11.1433	3.03133	0.17261	0.161149	0.180981	61.8724	1343.45	1.28216	1413.79	0.762305	9298.24	30.4399	0.436185	11.8484	43.3647	331.748	0.0377009	80.6217	5.43229	3.31544	1.33094	16.5242	4.80745	2.56744	1.14962	3.9031	6.08016	0.475227	2.88323	10.0063	172.278	0.546862	1.95287	2.47891	38.4381	3.61019	153.418	0.19036	0.839785
Gale et al., this study	CHR0098-011-101	GL	MARR106	-41.817	30.683	49.76	1.55	9.73	8.45	14.78	11.38	2.51	0.06		0.11	60.9864	1372.57	1.32724	1591.51	0.814115	9292.25	7.71	0.58	8.753	46.5	355	0.0086	64.6	5.689	3.70689	1.204	16.77	4.38216	2.432	1.269	2.634	8.31	0.528	1.719	9.271	167.3	0.333	1.605	0.722		3.249	95.247	0.118	0.868
Gale et al., this study	HLY0102-007-061	GL	GAKK16	-3.11917	83.6	50.233	1.54632	9.44144	8.14024	15.6899	10.7829	2.90848	0.286126	0.171836	0.171635	60.8139	1355.99	1.33754	1427.76	0.756722	9270.19	58.1046	0.610035	13.3784	41.77	250.944	0.0642424	71.0083	5.39433	3.30254	1.23006	16.626	4.80001	2.61552	1.1545	4.99133	6.06106	0.490807	4.95482	11.0058	130.251	0.595713	2.12003	4.95156	36.2078	3.44918	145.65	0.312245	0.825004
Kelley, Kingsley, and Schilling, in revision	DST0041-002-A	GL	GALA16	-85.12	1.74	49.712	1.54263	8.61539	8.84722	15.5079	12.3244	2.84709	0.0603318		0.120664	64.893	1325.38	1.16828	1444.41	0.821428	9248.07			13.27	39.88	348.1	0.011	77.8	5.34	3.38	1.31	17.02	4.66	2.63	1.17	3.72	5.57	0.48	1.538	11.71	130.2	0.562	2.31		40.51	3.68	150.4	0.1094	0.84
Arevalo and McDonough (2008)	KNO0115-004-006		MARR117	314.92	25.8	50.44	1.542	8.9981	8.9	15.31	11.1	2.73	0.113574	0.15	0.17	64.0336	1335.5	1.14504	1428.64	0.789847	9244.29	8.07252		10.7203					4.72499	2.91514	1.14027		3.93368	2.12621	1.00278	2.92866		0.414639	2.34205	8.7046		0.537435	1.66675			2.88617	119.8	0.156598	0.728993
Gale et al., this study	POL0059-270-008	GL	GAKK10	49.8425	86.7425	49.5233	1.53882	8.29253	8.79816	16.3475	10.6922	3.2202	0.407141	0.213052	0.151995	65.6328	1310.95	1.22151	1251.57	0.753485	9225.23	58.6251	0.858761	17.8702	41.3895	378.038	0.0578342	66.3018	4.78584	2.79911	1.25309	16.174	4.47946	2.81124	0.998	7.12851	5.42784	0.408363	9.54582	12.6636	180.941	0.795969	2.63968	4.75771	33.2244	3.52047	238.704	0.553222	0.748792
Gale et al., this study	HLY0102-007-SG	GL	GAKK16	-3.11917	83.6	50.1434	1.53776	9.3499	8.19853	15.6328	10.8135	3.06033	0.288842	0.16551	0.175904	61.2154	1353.51	1.35562	1423.82	0.765037	9218.87	58.5179	0.660417	13.6978	41.2686	254.972	0.0658521	71.3579	5.50082	3.32071	1.25562	17.1048	4.86109	2.67972	1.17516	5.11813	5.98105	0.495587	5.09536	11.3046	121.828	0.629518	2.20001	4.73646	36.9957	3.52348	146.098	0.310226	0.844895
Kelley, Kingsley, and Schilling, in revision	EWI9309-010-005	GL	MARR245	-8.14	-49.245	50.604	1.53704	10.107	8.42333	14.7011	11.0761	2.8374	0.0897627	0.139631	0.149605	60.0024	1382.77	1.42077	1610.47	0.815139	9214.55	12.7		11.31	41.55	260.3		58.1	6.07	3.83	1.262	16.6	4.89	2.43	1.34	3.38	7.16	0.531	1.674	10.57	115.3	0.433	1.93	0.74	37.95	3.58	118.9	0.1284	0.912
Kelley, Kingsley, and Schilling, in revision	CON2806-042-007	GL	MARR161	-30.676	2.176	50.8765	1.53344	9.74968	8.39616	14.3335	10.829	2.55875	0.475811	0.178429	0.148691	60.786	1365.91	1.27541	1502.32	0.80481	9192.97	117.5		27.09	40.58	343.7	0.124	60.4	4.58	2.76	1.27	15.68	4.35	2.49	0.97	12.3	5.12	0.382	19.73	15.57	144.6	0.714	3.6	10.05	34.39	3.88	201.8	1.1949	0.72
Gale et al., this study	NHOCHEP-023-007	GL	EPRR25	-103.928	12.717	50.0457	1.53057	9.51574	8.03551	15.4568	11.6807	2.71878	0.188301	0.171183	0.176217	60.3174	1362	1.34588	1504.12	0.784109	9175.77	24				510		80													101				40		150
LAWSON, 1996	DAR0057-029-003-2C	WR	MARR120	-46.267	24.358	50.54	1.52483	9.38972	8.08057	15.5743	10.9597	2.94933	0.180571	0.160508	0.17054	60.7695	1352.53	1.28475	1441.29	0.757713	9141.36	25.91		12.89	44.3	334.1	0.03	62.4	5.2	3.35	1.23	15.69	4.32	2.7	1.13	4.56		0.49	5.12	10.5	135.29	0.837	1.97	2.6	38.06	3.38	143.4	0.301	0.85
Kelley, Kingsley, and Schilling, in revision	CON2806-016-010	GL	MARR169	-16.235	-0.27	50.2436	1.5244	9.70629	8.32799	14.8879	11.0318	3.04936	0.279412	0.159664	0.169643	60.698	1368.02	1.4186	1520.19	0.807665	9138.78	50.15		17.39	40.59	316.7	0.061	59.7	5.41	3.35	1.305	16.32	4.35	2.71	1.21	6.63	4.68	0.469	8.55	12.96	155.7	0.649	2.64	4.587	52.96	3.75	162.5	0.5276	0.827
ROBINSON, 2001	DIS0208-012-037F	GL	SWIR62	65.94	-27.613	50.4036	1.52438	8.4336	8.01786	16.7979	10.0273	3.87035	0.158377	0.148479	0.178175	63.1169	1312.34	1.23536	1233.89	0.694215	9138.66			17.1					5.26	3.72	1.4		4.8		1.23	5.7		0.47		11.9			2.6			3.5			0.8
Gale et al., this study	POL0059-270-014	GL	GAKK10	49.8425	86.7425	49.3237	1.52349	8.22966	8.65339	16.4983	10.7788	3.29454	0.445012	0.226267		65.43	1309.35	1.23601	1239.92	0.748817	9133.32	58.9183	0.895351	17.513	41.1879	384.534	0.0588736	66.7709	4.74726	2.74514	1.24687	16.169	4.54168	2.7927	0.987316	6.98457	5.4144	0.408551	9.43597	12.6136	183.322		2.60002	4.53575	32.5806	3.52678	231.438	0.561292	0.749015
Jenner and O'Neill, 2012	AII0107-7-006-036	GL	MARR228	-16.6	-41.26	50.2215	1.52005	9.9591	8.54955	14.9164	11.3236	2.68063	0.1099	0.169845		60.711	1377.84	1.38972	1597.12	0.818547	9112.7	18.0645	0.501229	10.9968	44.2037	348.045	0.0209878	74.4149	5.46362	3.34812	1.22807	17.7557	4.45928	2.41189	1.15396	3.73146	5.60664	0.47182	2.73989	10.0657	142.073	0.566397	1.81269	1.71744	39.4	3.49102	105.966	0.156552	0.798104
LE ROUX, 2000	AGU0032-010-053	GL	MARR250	-5.85	-51.28	50.6922	1.51929	9.74187	8.26059	14.3586	11.7001	2.53801	0.259715	0.139847	0.199781	60.4165	1368.48	1.28624	1573.03	0.82304	9108.14	53		14.3					3.66	2.4	1.3		4.45			6.4			7.47	11.5	79	0.92		4.1	45	3.22	162
Gale et al., this study	HLY0102-057-061	GL	GAKK8	67.5433	86.5558	49.6613	1.51768	8.19779	8.12272	17.2161	10.8975	3.29197	0.236936	0.162969	0.142787	64.0742	1306.37	1.19363	1218.52	0.700518	9098.49	24.7316	0.703915	14.2435	41.2781	353.758	0.02885	70.1352	4.86373	2.88101	1.26039	15.9424	4.60479	2.84494	1.02114	4.93396	5.50174	0.415876	4.78119	11.756	174.032		2.31885	2.04862	34.6737	3.50009	204.159	0.296493	0.77224
DAVIS, 2008	WFL2002-RC13	GL	JUAN15	-126.602	42.979	50.0659	1.51319	9.72824	8.33025	15.6482	11.2402	2.7285	0.110148	0.0901208	0.180242	60.6506	1369.19	1.3887	1517.06	0.781099	9071.57	20.6		12.42			0.02		6.07	3.72	1.3		5.25	2.81	1.3	4.58		0.58	4.17	10.88		0.47	2.09	2.01	37.8	3.91	119.1	0.26	0.93
DANYUSHEVSKY, 2000	MOA8801-016-028	GL	SEIR68	127.577	-50.163	50.0132	1.51307	9.34178	8.20286	15.07	12.0967	3.10231	0.0600045	0.14001	0.170013	61.2486	1356.78	1.3608	1545.84	0.821309	9070.85	3.558	0.52	10.1					5.4	3.27	1.32	16.8	4.46	2.59		2.97	5.68	0.461	1.26	10.24				0.348	39.8	3.45	137.9	0.098
PYLE, 1994	MOA8801-017-046	GL	SEIR68	127.417	-50.222	50.9186	1.51226	9.22097	8.22258	15.1063	11.6042	2.78783	0.0503218	0.130837	0.171094	61.6139	1344.55	1.1599	1481.6	0.782866	9066	4				310		72.1													97				36.2		102
KLEIN, 1991	VEM0033-1-003-010	WR	SEIR70	135.09	-50.417	48.59	1.51	8.973	8.5	15.77	11.57	2.78	0.299	0.171	0.166	63.033	1347.1	1.37807	1429.51	0.798504	9052.45	6.28				288		74													125				37.7		178
EISSEN, 1994	YOK0090-011-004	WR	FIJI2	173.393	-15.972	47.9	1.51	8.793	8.09	16.18	11.36	2.6	0.12	0.2	0.14	62.3507	1344.39	1.31782	1408.56	0.755378	9052.45	63			37	270			5	3.5	1.3					8.65			8.35	14	108			2.5	36		208
Gale et al., this study	POL0059-234-046	GL	GAKK14	3.25833	84.5725	50.0372	1.50444	9.19613	8.49942	15.8192	10.967	3.01738	0.172852	0.156376		62.4572	1346.41	1.29623	1423.65	0.771351	9019.12	30.5339	0.640174	11.5591	43.2731	359.913	0.0383747	77.5849	5.43832	3.30124	1.26335	16.1931	4.86728	2.66504	1.16713	3.79312	6.06781	0.48477	2.91154	10.6121	169.287	0.558191	1.97683	2.62684	37.3617	3.50908	154.239	0.187706	0.83525
Gale et al., this study	HLY0102-R007	GL	GAKK16	-1.765	83.875	50.3307	1.50433	9.35078	8.03181	15.831	10.9186	3.08281	0.166229	0.160349		60.7243	1352.11	1.31241	1431.12	0.751466	9018.46	23.0972	0.60882	11.9318	40.7882	248.284	0.0339788	71.2522	4.96944	3.27662	1.27455	15.6758	4.37369	2.56333	1.06231	3.71886	5.45074	0.430154	2.59265	10.163	151.257	0.551129	1.96748	2.30881	35.0022	3.32663	141.896	0.207478	0.767619
Sun et al., 2008	TAG-64a	GL	MARR116	-44.85	26.06	50.7186	1.501	9.116	8.22358	15.3416	10.925	2.635	0.104	0.131507		61.8872	1340.06	1.09789	1422.52	0.750815	8998.49	12.6952		11.8464					5.65587	3.45475	1.30476	17.5772	4.70431	2.6683		3.68586	6.19982	0.489911	2.97521	10.605		0.50581		1.33078	36.0452	3.61352	123.272
BOUGAULT, 1980; ROY-BARMAN, 1994;CHAUVEL, 2001; DEBAILLE, 2006	CHR0098-011	WR	MARR106	-41.817	30.683	50.0715	1.50005	10.2873	8.83027	14.6704	11.3503	2.57008	0.0800024	0.140004	0.180005	60.7082	1392.93	1.49022	1665.36	0.845888	8992.8	7.54		8.42			0.009		5.45	3.49	1.19		4.84	2.64	1.16	2.46		0.48	1.69	8.42		0.32	1.53	0.62		3.16	93.8		0.83
Kelley, Kingsley, and Schilling, in revision	END0113-013-001	GL	EPRR69	-112.45	-24.86	48.91	1.5	8.7	8.15	17.11	11.75	3.54		0.17	0.04	62.7728	1333.12	1.41974	1371.12	0.753685	8992.5			8.19	47.33	446.4	0.01	76.9	5.15	3.18	1.27	16.83	4.08	2.01	1.11	1.67	5.34	0.437		9.37	232.3	0.435	1.61	0.115	37.72	3.37	127.2		0.78
Gale et al., this study	POL0059-289-069	GL	GAKK8	69.9658	86.4708	49.9726	1.49911	8.39066	8.22108	16.5569	10.7031	3.46511	0.256162	0.194189		63.8156	1313.65	1.21144	1262.3	0.724429	8987.16	30.6976	0.788012	14.3993	42.8024	409.672	0.0472475	67.9509	4.80635	2.83644	1.21111	15.8924	4.38873	2.68716	1.01111	5.16386	5.81086	0.413773	5.03114	11.4674	199.34	0.782721	2.27519	2.7637	33.0014	3.38354	192.332	0.30789	0.746378
Jenner and O'Neill, 2012	MELWEST-064-004A	GL	PARR13	-117.7	-53.13	50.0876	1.49878	9.73189	8.47294	15.3865	11.8316	2.34571	0.0499299	0.139804		61.0462	1369.77	1.29856	1571.25	0.801807	8985.19	9.29871	0.390503	9.30766	44.0326	349.804	0.00979806	68.5467	5.23815	3.34616	1.15494	17.6042	4.03567	2.15214	1.15795	3.087	5.95763	0.500429	2.51903	8.60681	125.792	0.37922	1.58381	0.948432	38.5	3.20661	89.239	0.137372	0.763128
LE ROUX, 2000	AGU0032-010-038	GL	MARR250	-5.85	-51.28	51.1027	1.49659	9.46554	8.32896	14.401	11.6006	2.41626	0.279213	0.149578	0.139606	61.2983	1353.66	1.14302	1514.17	0.806714	8972.06	51		14.2					3.92	2.37	1.24		4.1			6.61			7.15	10.7	79	0.83		4.03	44	3.01	157
LE ROUX, 2000	AGU0032-010-016	GL	MARR250	-5.85	-51.28	51.041	1.49449	9.46154	8.13177	14.3521	11.7033	2.60824	0.278821	0.159326	0.149369	60.7384	1354.73	1.18467	1521.13	0.808933	8959.47	53		14.5					4.07	2.29	1.19		4.21			6.51			7.48	10.6	79	0.7		3.93	44	3.25	163
Gale et al., this study	HLY0102-060-023	GL	GAKK8	71.8325	86.27	49.3416	1.48975	8.75386	8.28538	16.8372	10.8416	3.42419	0.201844	0.178853	0.14153	63.0132	1332.14	1.37307	1317.96	0.736517	8931.05	21.9655	0.742219	13.9483	41.6905	348.108	0.0238294	70.8621	5.20075	3.1003	1.29077	16.7233	4.69719	2.86976	1.1049	4.75683	5.87621	0.461999	4.23626	11.6598	154.991		2.28995	1.69738	34.758	3.55764	182.383	0.274039	0.806219
Gale et al., this study	HLY0102-077-001	GL	GAKK10	51.2117	86.88	49.5377	1.4893	8.4338	8.73688	16.5966	10.6813	3.26833	0.28775	0.195017	0.139597	65.0922	1316.41	1.24906	1270.3	0.745502	8928.35	38.5878	0.843992	15.6193	41.6014	326.163	0.0386638	67.0315	4.95549	2.86924	1.22939	16.3287	4.477	2.78135	1.03176	5.79326	5.56472	0.425859	6.74474	12.1344	164.999	0.621867	2.44499	3.25958	33.8747	3.52955	211.474	0.405028	0.766247
Jenner and O'Neill, 2012	MELWEST-064-003B	GL	PARR13	-117.7	-53.13	49.991	1.48868	9.87184	8.50151	15.2648	11.8952	2.38327	0.0402259	0.120678		60.7864	1376.28	1.35106	1604.55	0.814344	8924.64	9.50272	0.382708	9.15969	43.3184	343.774	0.00897089	67.191	5.15841	3.38347	1.12059	17.2569	4.09681	2.1549	1.14868	3.03586	6.01072	0.482428	2.45486	8.56958	122.838	0.407325	1.62067	0.865975	38.2	2.95352	89.1194	0.146133	0.764717
Gale et al., this study	NHOCHEP-061-003	GL	EPRR33	-102.893	8.36	50.4393	1.48862	9.6216	8.04313	15.1468	11.8401	2.63079	0.0948482	0.136781	0.215655	60.0751	1364.51	1.29831	1544.75	0.792844	8924.28	5.104	0.64	10.308	42.3	299	0.006	79.2	5.67	3.65726	1.261	16.94	4.70766	2.686	1.245	3.033	6.38	0.513	1.857	10.37	88.2	0.437	1.831	0.468	40.7	3.469	114.33	0.134	0.872
Gale et al., this study	HLY0102-079-002	GL	GAKK10	49.6558	86.8317	48.7166	1.482	8.6244	8.0582	16.8655	10.5336	3.2418	0.1619	0.1537		62.712	1330.64	1.32077	1301.99	0.713542	8884.59	23.2648	0.856711	13.958	43.5756	370.124	0.0203206	77.6167	5.0331	2.95735	1.31042	16.8423	4.52831	2.78592	1.06889	4.70752	5.71109	0.42939	4.20732	11.4723	195.82	0.569792	2.23706	1.82947	34.3435	3.50847	196.99	0.275038	0.776836
NIU, 1997	WASRAI2-009-001	GL	EPRR32	-103.525	8.392	49.6636	1.48173	9.23646	8.82382	14.9848	12.5848	2.39023	0.109901	0.169847	0.189829	63.2297	1352.51	1.24555	1560.21	0.849125	8882.97	5.99	0.43	10.66	47.4	332	0.007	82.6	4.89	2.96	1.19	16.9	4.3	2.349	1.04	3.29	5.79	0.42	2.514	9.53	99.1	0.371	1.81	0.67	39.7	3.15	115	0.171	0.75
LAWSON, 1996	DAR0057-019-001-2A	WR	MARR120	-46.282	24.185	49.9432	1.47946	9.39786	8.17995	15.8297	11.1591	3.25178	0.100987	0.136333	0.171678	61.0399	1356.33	1.40741	1463.24	0.774435	8869.36	9.48		10.9	39.33	339.1		63.16	5.09	3.27	1.23	14.67	4.22	2.63	1.11	3.38		0.47	2.15	9.78	117.55	0.682	1.78	0.83	36.07	3.33	139.5	0.137	0.78
Gale et al., this study	RSR1979-007-061	GL	CIRR47	63.89	3.7	50.429	1.47535	9.79092	8.49469	15.1639	11.1466	2.68229	0.110397	0.160578		60.9634	1369.94	1.32712	1545.03	0.796286	8844.72	9.075	0.71	11.478	43.4	388	0.00823	69.8	5.815	3.68207	1.223	17.15	4.68534	2.813	1.321	3.692	6.59	0.53	2.59	10.592	166.3		1.888	0.755	35.7	3.623	114.208	0.176	0.888
INGLE, 2010	EWI0004-004-001	GL	GALA11	-91.057	1.892	48.8771	1.47172	9.80484	8.77264	15.313	12.4168	2.50306	0.122223	0.136248	0.199363	61.6932	1381.64	1.53407	1628.58	0.858467	8822.96	23.8		9.55					4.59	2.73	1.1		4.08	2.07	0.97	3.45		0.432		8.52		0.2904	1.63	2.08		2.96	116	0.26	0.729
Arevalo and McDonough (2008)	CON2802-027-002		MARR201	346.245	-26.4933	50.456	1.47032	9.18058	8.52789	15.5107	11.6625	2.52696	0.0700132	0.120023		62.5753	1344.41	1.15278	1469.05	0.782855	8814.57	2.86904		9.91591		368.633			5.06323	3.30061	1.18971		4.25132	2.34875	1.07268	2.87265		0.467487	1.3869	9.29251		0.543049	1.68073		35.4858	3.13902	112.029	0.102388	0.781056
Gale et al., this study	KNO0115-008-008p	GL	MARR120	-46.233	24.46	50.1925	1.47003	9.24307	8.18586	15.7072	11.4783	2.95013	0.100687	0.140962	0.181237	61.4513	1349.15	1.2911	1455.07	0.773277	8812.83	12.24		10.97		287	0.012	68	5.53	3.59	1.27		4.99	2.54	1.18	3.49		0.5	2.58	10.37	107		1.94	1.06	38	3.61	131.2	0.176	0.82
DAVIS, 2008	WFL2002-RC4	GL	JUAN15	-126.691	42.843	50.2351	1.46851	9.4726	8.09311	15.5712	11.6976	2.60729	0.129865	0.139855	0.189803	60.5968	1358.2	1.28469	1493.2	0.776198	8803.72	24.1		13.29			0.03		5.9	3.59	1.31		5.12	2.8	1.25	4.98		0.55	4.39	11.19		0.66	2.18	2.17	36	3.92	130.9	0.27	0.91
Kelley, Kingsley, and Schilling, in revision	CON2806-012-001	GL	MARR170	-15.888	-1.536	49.926	1.46757	9.94151	8.33404	15.26	11.1703	2.96628	0.169766	0.139807	0.169766	60.1427	1379.62	1.50385	1558.12	0.805803	8798.08	25.8		13.25	40.17	286.3	0.039	66.7	5.17	3.27	1.22	15.68	4.12	2.31	1.12	4.3	5.02	0.458	4.619	11.06	128.2	0.447	2.17	2.56	34.05	3.49	150.7	0.3167	0.766
Jenner and O'Neill, 2012	MELWEST-064-004D	GL	PARR13	-117.7	-53.13	50.0467	1.46612	9.86933	8.501	15.2552	11.8998	2.33826	0.0401743	0.14061		60.7911	1375.86	1.33451	1602.39	0.812753	8789.39	9.17667	0.494819	9.61595	43.1981	347.763	0.00913833	68.1365	4.3799	2.75349	1.0752	17.5588	3.87274	2.13176	0.939678	3.23451	5.99118	0.400317	2.8216	8.18977	124.513	0.347821	1.58168	0.920613	38.3	2.98014	127.228	0.191407	0.632006
Arevalo and McDonough (2008)	CON2802-027-005	GL	MARR201	346.245	-26.4933	50.5312	1.46586	9.32429	8.3884	15.4636	11.5877	2.58176	0.0698009	0.109687		61.8223	1349.52	1.18366	1483.76	0.780097	8787.83	2.77061		9.69569		355.376			5.4754	3.59737	1.15941		4.58208	2.58623	1.21476	2.87617		0.521763	1.35856	9.31151		0.506293	1.64978		37.8891	3.17936	110.981	0.106043	0.836392
DAVIS, 2008	WFL2002-456-R4	WR	JUAN15	-126.711	42.754	50.1913	1.46276	8.56898	8.31542	15.6294	12.0311	2.95013	0.140288	0.130267	0.170349	63.5932	1321.33	1.13505	1386.39	0.782852	8769.25	11.3		10.04		332	0.01	67	5.37	3.2	1.22	16	4.58	2.48	1.12	3.33		0.49	2.32	9.57	92	0.41	1.78	1.2	43	3.42	129.9	0.16	0.82
INGLE, 2010	EWI0004-015-001	GL	GALA11	-91.607	2.047	49.6171	1.46204	10.0494	8.88063	14.6473	12.1391	2.20877	0.175362	0.170352	0.187387	61.3997	1386.91	1.43728	1663.82	0.865264	8764.93	52.5		14.9	46.7	390			5.15	3.12	1.19		4.65	2.42	1.09	6.09		0.499	8.1	11.1	144	0.4127	2.3	4.5	42.3	3.48	117	0.534	0.821
MAHONEY, 2002;CHRISTIE, 2004	MELWEST-10-134-001	GL	SEIR51	112.49	-50.296	50.6409	1.46121	9.26493	8.26567	15.2178	11.7413	2.66865	0.0991325	0.120942	0.169517	61.625	1347.97	1.18988	1484.78	0.787376	8759.95	16.5		9.83	42.4	286		54.7	5	3.16	1.14			2.34	1.11	3.28		0.467	2.56	9.16	112.7	0.364	1.74	1.57	33.2	3.13	97.6	0.156	0.777
DAVIS, 2008	WFL2002-456-R8	WR	JUAN15	-126.71	42.754	50.1549	1.46039	8.55559	8.27477	15.6731	11.9768	2.8729	0.208622	0.139081	0.168884	63.5159	1321.17	1.13244	1370.79	0.777207	8755.04			10.13		332		69	5.4	3.26	1.24	16	4.57	2.46	1.14	3.39		0.49	2.39	9.69	90	0.4	1.79		43.1	3.5	133.1	0.16	0.83
Gale et al., this study	KNO0115-010	GL	MARR120	-46.31	24.03	50.5734	1.45759	9.13759	8.39372	15.2795	11.6607	2.79456	0.0777508	0.138721		62.3134	1342.27	1.16955	1470.47	0.789364	8738.25	11.659		10.423			0.01209		5.465	3.62003	1.279		4.55235	2.459	1.162	3.262		0.485	2.312	9.95			1.842	0.953		3.454	128.491	0.161	0.824
DAVIS, 2008	WFL2002-456-R7	WR	JUAN15	-126.71	42.754	50.2135	1.45733	8.76954	8.22249	15.5813	11.9174	2.93918	0.159734	0.129784	0.169717	62.7937	1329.84	1.17952	1407.14	0.781417	8736.69			9.97		330		61	5.27	3.21	1.22	16	4.5	2.47	1.12	3.31		0.48	2.33	9.44	84	0.38	1.74		42.6	3.44	131.7	0.16	0.82
Jenner and O'Neill, 2012	MELWEST-064-002	GL	PARR13	-117.7	-53.13	49.8098	1.45471	9.89247	8.57786	15.3638	11.9506	2.347	0.0401444	0.120433		60.9497	1378.18	1.37479	1607.92	0.817971	8720.99	9.11999	0.380725	8.78167	42.3152	337.419	0.00897153	66.5152	5.3434	3.32986	1.18996	16.9441	3.88436	2.21742	1.12804	2.90507	5.90605	0.482294	2.34431	8.00449	123.846	0.361677	1.56652	0.785089	36.8	3.02523	87.4503	0.148693	0.737313
DANYUSHEVSKY, 2000	MOA8801-016-009	GL	SEIR68	127.577	-50.163	49.7584	1.45152	9.22317	8.28175	15.3589	12.1419	3.11416	0.0800411	0.110056	0.160082	61.7777	1352.11	1.36451	1515.27	0.817942	8701.86	3.6	0.42	10.24					5.11	3.1	1.31	17.2	4.33	2.52		2.87	5.97	0.442	1.25	9.92				0.361	37.9	3.37	139	0.098
Gale et al., this study	NHOCHEP-077-001	GL	EPRR30	-104.268	8.925	49.6919	1.45056	9.78829	8.28031	15.5533	11.675	2.84069	0.0805869	0.143042	0.176284	60.3598	1375.35	1.47377	1560.46	0.803949	8696.11	6.7		10.899		280		72	5.5	3.5	1.51									10.217	113				39	3.51	134
Kelley, Kingsley, and Schilling, in revision	END0061-017-001	GL	MARR189	-13.49	-14.66	50.6682	1.44968	9.43296	8.04369	15.0404	11.4464	2.90942	0.110739	0.32215	0.211411	60.5507	1355.29	1.26176	1499.36	0.784709	8690.83	18.43		12.69	42.32	255	0.027	79.14	5.84	3.69	1.273	16.07	4.44	2.46	1.29	4.14	5.47	0.513	4.027	10.69	82.7	0.473	2.06	1.46	40.78	3.68	129.3		0.886
CHRISTIE, 2004	MELWEST-10-127-004	GL	SEIR49	109.884	-49.659	50.2097	1.4495	7.96144	8.05892	16.6575	11.2829	2.99551	0.355483	0.162478	0.125059	64.5646	1295.16	1.04529	1198.07	0.70839	8689.75	75.7		19.22	38.5	290.3		82.4	4.45	2.82	1.13			2.75	0.919	8.34		0.393	8.56	12	138.4	0.968	2.66	7.18	31.8	3.43	180.5	0.612	0.685
Gale et al., this study	WASPLUM-5-050-002	GL	MARR214	-14.571	-33.695	50.3236	1.44872	9.02938	8.47189	15.779	11.4476	2.72673	0.0995521	0.12444	0.199104	62.8096	1338.95	1.18778	1419.28	0.769557	8685.08	14.864	0.62	10.373	36.4	312	0.01988	64.4	5.408	3.44632	1.177	13.13	4.46214	2.526	1.179	3.261	6	0.485	2.579	9.926	117.5	0.612	1.795	1.488	32	3.411	104.776	0.159	0.838
Gale et al., this study	POL0059-295-002	GL	GAKK10	52.195	86.8108	49.8674	1.44816	8.17944	8.15805	16.7181	10.9923	3.15488	0.362514	0.220751	0.15181	64.2256	1305.41	1.15121	1219.52	0.715213	8681.72	54.0141	0.806656	15.9268	41.6472	420.322	0.0589138	77.1804	4.82568	2.85751	1.18415	15.753	4.39624	2.66598	1.01706	6.28057	5.71011	0.424211	8.18768	11.7164	187.08	0.640597	2.3934	4.60491	33.2048	3.3851	193.585	0.46638	0.748587
Gale et al., this study	KNO0115-002-012	GL	MARR116	-44.73	26.27	50.6237	1.44733	9.18788	9.18386	14.7305	11.4949	2.61248	0.0854079	0.133638	0.172825	64.2757	1343.77	1.14724	1503.81	0.831424	8676.74	6.798		9.231			0.01011		5.575	3.54145	1.198		4.34589	2.411	1.165	2.775		0.481	2.157	9.235			1.675	0.734		3.338	106.442	0.147	0.824
DEBAILLE, 2006	CHR0098-016	WR	MARR118	-45.333	25.267	49.3031	1.44714	8.91797	8.14014	16.7828	11.7781	2.74353	0.150743	0.150743	0.160793	62.1643	1340.02	1.30552	1378.56	0.745263	8675.6			9.19					5.21	3.24	1.18		4.56		1.09	2.9		0.44		8.96		0.35	1.62			3.2	115		0.77
Gale et al., this study	HLY0102-058-SG	GL	GAKK8	70.0025	86.5275	49.4642	1.44672	8.3268	8.09836	16.9429	11.3194	3.20492	0.265937	0.175649	0.158456	63.6445	1313.84	1.23334	1259.82	0.723563	8673.09	36.5883	0.76852	14.7504	38.4915	304.9	0.0356906	73.2908	4.74189	2.77212	1.23652	16.484	4.37748	2.67027	0.995789	5.46682	5.32469	0.406343	6.47385	11.5806	127.096	0.621087	2.3171	2.89148	34.5472	3.37766	198.204	0.387557	0.749536
DAVIS, 2008	WFL2002-454-R6	WR	JUAN15	-126.709	42.754	50.2166	1.4463	8.76488	8.35251	15.5631	11.9012	2.90637	0.139693	0.129715	0.169627	63.1718	1329.96	1.17268	1411.31	0.785678	8670.57			9.92		327		69	5.26	3.18	1.21	17	4.56	2.41	1.11	3.31		0.49	2.31	9.34	92	0.39	1.74		42.4	3.43	130.5	0.16	0.8
Gale et al., this study	NHOCHEP-076-004	GL	EPRR30	-104.251	8.942	49.8757	1.44509	9.57272	8.07846	15.4544	12.1428	2.64933	0.102361	0.14752	0.178629	60.3021	1365.93	1.36395	1546.07	0.800405	8663.31	10		10.476		325		74	5.46	3.43	1.24		4.44							9.4	92				40.4	3.29	124
DAVIS, 2008	WFL2002-456-R6	WR	JUAN15	-126.71	42.754	50.1579	1.44489	8.67566	8.42701	15.5977	11.9093	2.91395	0.149525	0.129589	0.169462	63.6153	1326.06	1.15886	1397.94	0.787001	8662.12			9.71		331		64	5.08	3.02	1.18	16	4.38	2.38	1.09	3.24		0.47	2.29	9.22	96	0.39	1.7		42.7	3.31	128.6	0.16	0.79
LE ROEX, 1989; JANNEY, 2005	MELPROT-5-028-009	WR	SWIR30	39.852	-43.377	49.723	1.4435	10.5276	9.28987	14.3174	10.7282	2.57332	0.351155	0.140462	0.180594	61.3657	1404.18	1.62077	1657.35	0.873648	8653.78	103		14.7	53	332	0.14	80	4.79	2.94	1.15		4.17	2.25	1.02	6.03		0.43	5.7	10.3	220	0.85	2.14	6.16	40	3.12	202		0.72
Arevalo and McDonough (2008)	CON2802-027-006		MARR201	346.245	-26.4933	50.3089	1.44325	9.33084	8.45869	15.6097	11.6003	2.53641	0.0796562	0.139398		62.0025	1351.25	1.20788	1481.3	0.780657	8652.28	2.81505		9.80956		362.085			5.26376	3.45256	1.17849		4.46198	2.34587	1.14474	2.85574		0.460498	1.38888	9.26212		0.53339	1.69265		36.2499	3.13813	109.915	0.107575	0.799317
Gale et al., this study	KNO0115-006-012	GL	MARR118	-45.29	25.55	50.7614	1.44292	8.86237	8.67505	15.2984	11.4699	2.7648	0.0851477	0.14425	0.168292	63.7938	1329.13	1.09031	1416.66	0.785482	8650.31	8.051		9.866			0.00904		5.376	3.47838	1.221		4.22592	2.394	1.124	3.105		0.467	2.585	9.478			1.744	0.808		3.227	127.641	0.16	0.804
MEYZEN, 2003	DUFEDUL-035-004	GL	SWIR53	59.91	-30.52	49.8645	1.44199	9.0482	8.10738	16.3559	10.8199	3.29741	0.201676	0.201676	0.161341	61.7274	1341.94	1.35231	1362.38	0.740399	8644.73	19.4		14.49	39	339		56	5.34	2.95	1.33	17.2	4.78	2.97	1.07	4.87		0.44	3.29	12.9	134		2.31	1.71		4.1	175	0.26	0.83
DAVIS, 2008	WFL2002-454-R7	WR	JUAN15	-126.708	42.753	50.2985	1.44011	8.54642	8.35796	15.6153	11.9092	2.93543	0.158966	0.12916	0.168902	63.7722	1319.54	1.11607	1373.29	0.779483	8633.46			9.87		333		69	5.2	3.14	1.22	18	4.51	2.43	1.11	3.31		0.48	2.35	9.34	92	0.37	1.73		43.4	3.37	130	0.17	0.81
Gale et al., this study	ALV0527-006-003	GL	MARR88	-33.25	36.808	49.6684	1.43803	9.99221	8.44416	14.8265	12.0897	2.41152	0.211352		0.181159	60.3353	1384.76	1.45941	1628.89	0.842871	8620.99	67.423		16.902			0.0704		5.227	3.33155	1.182		4.22778	2.451	1.142	7.423		0.484	12.613	11.366		0.603	2.39	5.875		3.349	112.511	0.728	0.805
Kelley, Kingsley, and Schilling, in revision	EWI9309-028-003	GL	MARR240	-13.45	-46.9	49.457	1.43708	9.75811	8.74643	15.3302	11.4477	3.02437	0.13968	0.0997716	0.149657	61.7354	1374.69	1.52656	1561.56	0.832778	8615.29	28.1		13.26	42.83	316.5	0.038	65.1	5.83	3.67	1.254	17.48	4.68	2.37	1.29	4.39	6.37	0.521	3.011	11.01	129.9	0.513	2.09	2.41	39.24	3.64	135.1	0.1953	0.89
Gale et al., this study	MOA8801-006-002	GL	SEIR67	126.883	-48.765	51.3284	1.43434	8.52004	8.14319	15.4981	11.4166	2.98045	0.0707225	0.141445	0.161651	63.2405	1313.31	0.998264	1342.01	0.746138	8598.87	7.512	0.66	10.302	37.6	344	0.00782	65.9	5.259	3.31604	1.226	16.48	4.27707	2.565	1.119	3.147		0.454	1.622	9.799	105.3	0.358	1.821	0.598	34.7	3.346	130.425	0.119	0.792
Gale et al., this study	HLY0102-063-004	GL	GAKK7	84.5825	85.6342	49.7228	1.43156	8.36621	8.17963	16.9686	10.904	3.21846	0.272711	0.188378	0.136803	63.7662	1313.66	1.21284	1243.07	0.712284	8582.2	24.8127	0.846774	15.7973	39.981	267.477	0.0231917	64.2157	4.46581	2.81565	1.23416	15.654	4.05258	2.65429	0.939172	5.41362	4.85827	0.370417	5.21029	11.349	121.169	0.65522	2.36452	1.84602	32.4099	3.32903	215.961	0.369475	0.698973
MAHONEY, 2002	MELWEST-10-116-002	GL	SEIR46	106.494	-48.873	49.863	1.43144	8.13091	8.83971	16.0374	11.3101	3.07146	0.33611	0.159158	0.110719	66.1809	1302.98	1.11305	1266.69	0.770735	8581.48	60.2														7.16			9.79	12.5		0.654		5.54		3.79	141
Kelley, Kingsley, and Schilling, in revision	END0113-016-001	GL	EPRR68	-111.93	-24.2	49.4372	1.43044	9.30168	8.5547	15.2219	12.1347	3.0531	0.0992955	0.238309	0.178732	62.3416	1357.74	1.41408	1540.42	0.838569	8575.49	29.6		14.03	42.35	317.3	0.031	73.8	5.33	3.34	1.29	17.97	4.58	2.34	1.16	5.24	3.65	0.438	5.617	10.87	109	0.563	2.16	2.46	40.34	3.53	157.8	0.3685	0.844
HAMELIN, 2010	ATAPACA2-038-001	WR	PARR5	-111.34	-41.8	49.4558	1.43029	9.69135	8.41051	15.8138	11.7848	2.68935	0.0805798	0.141015	0.181304	60.9696	1371.68	1.4512	1541.88	0.801069	8574.59	7.4		10.16					5.41	3.37	1.29		4.41	2.4	1.17	3.14		0.46	2.32	9.64		0.61	1.74			3.34	131		0.82
KARSTEN, 1996;STURM, 1999	KNO0138-11-061-001	GL	CHIL23	-82.1803	-44.4635	50.09	1.43	9.603	8.28	14.88	11.04	2.69	0.075	0.147	0.176	60.8153	1365.34	1.2871	1533.59	0.790989	8572.85	17.4		10.8		290	0.013	66	6.4	3.9	1.26		5.16	2.73	1.42	3.39		0.583	2.86	10.26	133	0.322	1.88	1.31	37.1	3.67	99	0.191	0.984
MAHONEY, 2002;CHRISTIE, 2004	MELWEST-10-133-001	GL	SEIR51	112.316	-50.316	50.5907	1.42996	8.86573	8.07627	15.4664	11.9739	2.91652	0.0913583	0.119163	0.132072	62.1171	1332.39	1.1477	1427.91	0.776524	8572.61	10		9.89	40.4	347.8		66.3	4.62	3.02	1.05			2.48	0.972	3.09		0.419	1.84	9.26	101.1	0.435	1.71	0.886	36.5	3.08	111.1	0.137	0.693
Gale et al., this study	HLY0102-045-019	GL	GAKK12	25.0783	86.0217	48.7563	1.42824	10.4381	8.82268	16.053	10.4198	3.12443	0.162266	0.171682	0.180396	60.3399	1404.59	1.82698	1574.25	0.809215	8562.3	31.7471	0.57047	11.229	50.1162	434.391	0.0297392	89.9862	5.0907	3.046	1.19941	16.872	4.48735	2.42773	1.08741	3.99178	6.20344	0.455905	4.73873	9.82304	201.198	0.746656	1.86084	2.60817	33.2537	3.22889	150.562	0.280464	0.773705
Gale et al., this study1	KNO0115-015	GL	MARR121	-44.955	23.362	49.7619	1.42578	9.54874	8.26352	15.9748	11.2356	2.90177	0.144587	0.153623	0.173705	60.9028	1363.48	1.41596	1472.98	0.772661	8547.55	13.627		11.271			0.01959		5.81	3.73998	1.307		4.66116	2.527	1.261	3.799		0.519	3.605	10.314			1.94	1.289		3.506	134.314	0.229	0.874
Kelley, Kingsley, and Schilling, in revision	CON2806-057-001	GL	MARR155	-32.578	4.372	50.3334	1.42508	10.314	8.85494	14.3808	11.2621	2.61553	0.121147	0.121147	0.191816	60.7129	1392.25	1.46783	1665.6	0.852986	8543.35	20.3		11.3	40.97	276.1		70.6	4.98	3.18	1.14	14.89	3.87	2.05	1.1	3.57	4.94	0.456	4.055	9.71	132.1	0.322	1.88	2.02	35.42	3.16	119.2	0.2767	0.728
LE ROUX, 2000	EWI9309-044-010	GL	MARR227	-16.792	-40.862	50.261	1.42453	9.89402	8.40892	14.6495	12.0482	2.59769	0.0902729	0.100303	0.190576	60.4715	1377.29	1.37725	1629.06	0.838977	8540.06	12.6		9.13					5.22	3.34	1.1		4.8			3.17			2.22	8.99	88			1.08	47	3.34	98	0.12
NIU, 1997	WASRAI2-109-005	GL	EPRR23	-104.303	14.137	49.9449	1.42412	7.98184	8.43094	15.5717	12.2057	2.64622	0.477037	0.22858	0.168951	65.5324	1298.39	1.01441	1275.72	0.781137	8537.6	108.6	0.75	22.29	41.2	263	0.096	71.7	3.9	2.44	1.16	17	3.81	2.281	0.84	10.04	5.4	0.34	14.878	12.57	118	0.798	3.13	8.62	34.2	3.19	230	0.814	0.62
Gale et al., this study1	AII0129-7-R025	GL	MARR121	-44.962	23.358	50.0233	1.41886	9.28941	8.22656	15.8325	11.361	2.92286	0.146024	0.197948	0.161342	61.4503	1351.61	1.31951	1445.17	0.770657	8506.07	11.297		11.163			0.01681		5.596	3.55903	1.267		4.52538	2.62	1.217	3.785		0.509	3.517	10.189		0.442	1.862	1.256		3.412	137.047	0.225	0.85
DAVIS, 2008	WFL2002-456-R9	WR	JUAN15	-126.711	42.756	50.3755	1.41804	8.70965	8.31557	15.3419	12.0508	2.96371	0.129945	0.129945	0.169928	63.2158	1326.8	1.1445	1417.35	0.793824	8501.15			9.21		338	0.01	71	5.18	3.12	1.2	18	4.41	2.34	1.11	3		0.48	1.78	9.11	83	0.37	1.66		45.1	3.32	124.4	0.13	0.8
LE ROUX, 2000	EWI9309-019-004	GL	MARR249	-6.158	-51.062	50.0466	1.41667	9.74042	8.17032	14.4279	12.3807	2.63317	0.257522	0.14857	0.188189	60.157	1373.47	1.38844	1611.23	0.849155	8492.94	51		14.6					4.67	2.51	1.12		3.78			6.53			7.16	10	71	0.4		3.65	46	3.22	144	0.39
Gale et al., this study	MOA8801-004-002	GL	SEIR67	127.36	-48.763	50.1118	1.41518	8.55805	8.31527	15.989	11.6333	3.35848	0.0505795	0.131507	0.161854	63.6223	1321.78	1.20856	1366.81	0.770013	8484	2.821	0.92	11.001	37.3	299	0.00394	72.9	4.568	2.75458	1.154	15.52	3.89205	2.455	0.976	3.327		0.394	0.969	9.88	87.6	0.495	1.825	0.272	38.2	2.964	184.832		0.718
KARSTEN, 1996;STURM, 1999	KNO0138-11-034-001	GL	CHIL26	-76.7798	-45.7813	50.7967	1.41358	9.40325	8.72019	14.8134	11.4585	2.78884	0.0464807	0.117212	0.172787	62.5362	1352.56	1.20998	1523.16	0.814871	8474.41	13.1		7.18		317	0.014	66	5.3	3.18	1.12		4.44	2.28	1.16	1.89		0.485	1.2	8.57	136	0.315	1.45	1.11	36.9	3.15	88	0.078	0.852
DAVIS, 2008	WFL2002-454-R11	WR	JUAN15	-126.696	42.751	50.6318	1.41353	9.16178	8.29765	14.9049	12.13	2.59863	0.140514	0.130478	0.180661	61.9805	1344.74	1.15682	1496.95	0.806994	8474.11	15.4		9.51		220	0.01	67	5.2	3.22	1.14	17	4.29	2.22	1.11	3.41		0.5	3.03	8.68	71	0.37	1.61	1.53	45.7	3.24	107.4	0.2	0.8
HEKINIAN, 1987;SARDA, 1985;CHAUSSIDON, 1994	CYA1978-012-034	GL	EPRR14	-109.05	20.9	49.95	1.41	9.47	8.06	14.67	12.06	2.27	0.11	0.16	0.19	60.5055	1362.91	1.21179	1565.67	0.807206	8452.95	19.3				296		78.6													88.5				41.6		114
CHAUVEL, 2001; DEBAILLE, 2006	CHR0098-015	WR	MARR112	-44.083	27.767	50.1832	1.40879	9.48218	8.9257	15.2451	11.381	2.64652	0.0905652	0.130816	0.171068	62.8855	1358.12	1.28499	1515.66	0.813911	8445.7	9.16		8.83			0.007		5.21	3.27	1.16		4.47	2.33	1.1	2.73		0.44	1.76	8.61		0.2	1.54	0.7		3.11	117		0.77
Jenner and O'Neill, 2012	AII0107-7-006-046	GL	MARR228	-16.6	-41.26	49.9734	1.40653	9.78341	8.1634	15.6367	11.6056	2.69001	0.0798959	0.159792		60.0311	1372.74	1.3919	1544.88	0.786371	8432.15	15.3585	0.456926	10.1005	44.0987	332.239	0.0168829	87.7309	5.01465	3.22274	1.15017	17.7438	4.12474	2.19577	1.11174	3.39501	5.40772	0.454277	2.38628	9.24122	108.706	0.509133	1.67339	1.3405	40.9	3.24085	115.211	0.141743	0.754625
INGLE, 2010	EWI0004-067-001	GL	GALA9	-95.032	2.627	49.8003	1.40537	10.1668	8.51877	14.9668	12.1058	2.22195	0.114037	0.137045	0.192063	60.1311	1390.29	1.44597	1655.94	0.837597	8425.19	31		11.6	50.9	369			5.11	3.22	1.1		4.33	2.24	1.12	4.28		0.528	5.2	9.4	151	0.4176	1.9	2.7	45.8	3.15	93.6	0.33	0.795
Kelley, Kingsley, and Schilling, in revision	EWI9309-031-001	GL	MARR238	-13.45	-46.388	49.3163	1.40463	9.14944	8.44343	15.8705	11.1611	2.87284	0.508001	0.159373	0.149412	62.4216	1349.32	1.3999	1382.26	0.782534	8420.76	126.9		22.09	44.89	332.3	0.174	69.6	5.16	3.12	1.346	18.48	4.57	2.58	1.11	9.53	4.66	0.43	10.54	13.6	136.8	0.883	2.9	10.67	36.88	3.85	237.1	0.6652	0.793
Gale et al., this study	NHOCHEP-021-007	GL	EPRR25	-103.935	12.781	49.888	1.40373	9.24039	8.15982	15.6531	12.0176	2.80746	0.122195	0.151482	0.174709	61.3826	1352	1.31012	1481.49	0.790433	8415.36	13.2				315		84													95				40.2		144
Sun et al., 2008	88553	GL	MARR121	-44.95	23.38	50.7632	1.403	8.681	8.189	16.401	11.389	2.73037	0.135	0.0811619		62.9353	1320.79	1.06794	1322.38	0.724902	8410.99	6.60137		11.3872					4.661	2.84963	1.26836	15.3384	4.06872	2.22733		3.50867	5.51048	0.397511	2.45699	9.75177		0.49265		0.534643	32.822	3.18074	156.08	0.16471
Gale et al., this study	HLY0102-051-SG	GL	GAKK11	43.5492	86.555	49.5498	1.40088	7.9769	8.63096	17.2286	11.076	3.09803	0.211295	0.165661	0.144492	66.074	1296.95	1.12312	1201.46	0.717313	8398.28	22.6257	0.759133	13.7697	39.6098	314.667	0.0202957	69.1191	4.54458	2.66421	1.19824	16.2758	4.19773	2.6231	0.955379	4.81622	4.9453	0.39057	4.5275	11.0194	145.357	0.581286	2.1953	1.64298	33.6475	3.22975	213.379	0.285136	0.715737
LE ROUX, 2000; LE ROUX, 2001	EWI9309-031-002	GL	MARR238	-13.455	-46.388	50.2579	1.39985	9.10906	8.41469	15.1288	10.9847	2.94096	0.496345	0.178684	0.138977	62.4454	1342.8	1.27241	1389.48	0.788516	8392.1	97		16.7					4.1	2.49	1.23		4.12			8.17			9.06	11.1	113	1.03		8.08	36	3.21	190	0.67
LE ROUX, 2000	EWI9309-044-009	GL	MARR227	-16.792	-40.862	50.0827	1.39931	10.0331	8.45002	14.6933	12.052	2.60717	0.0805353	0.120803	0.161071	60.2541	1384.17	1.43731	1652.17	0.845272	8388.86	13.3		9.74					5.24	3.45	1.14		4.99			3.21			2.26	9.25	85			0.85	47	3.22	100
CHRISTIE, 2004	MELWEST-10-071-014	GL	SEIR32	90.795	-42.886	50.5634	1.39343	8.9104	8.10054	15.5461	11.8868	2.90595	0.101232	0.129021	0.110164	62.0695	1333.85	1.15756	1424.03	0.77372	8353.61			10.28	41.7	351.7		62.1	4.85	3.12	1.13			2.43	1.02	3.26		0.444	2.3	9.45	91.8	0.448	1.76		39.5	3.3	139	0.186	0.707
CHRISTIE, 2004	MELWEST-10-139-012	GL	SEIR52	113.106	-50.245	50.4286	1.39122	8.85641	8.12048	15.4103	12.1701	2.83788	0.141138	0.12904	0.104845	62.2702	1333.54	1.15646	1434.47	0.786588	8340.36	18.2		10.83	40.5	354.6		68.7	4.68	2.99	1.02			2.46	0.993	3.78		0.434	3.11	9.34	98	0.437	1.78	1.49	38.2	3.09	115.8	0.245	0.704
Gale et al., this study	NHOCHEP-015-002	GL	EPRR25	-103.888	12.85	49	1.39	9.51	8.22	15.2	11.9	2.55	0.109	0.179	0.173	60.8739	1369.11	1.38755	1558.65	0.812872	8333.05	11.8				329		112													101				39.1		134
FRETZDORFF, 2002	JCR039B-R049	GL	BSCO4	-30.11	-57.6	50.2722	1.38923	8.11552	8.1555	16.261	11.3737	3.42811	0.129928	0.299834	0.179901	64.3985	1302.01	1.10913	1267.06	0.737875	8328.43	11.7		11.8	36.7	250	0.011	58.3	4.65	2.79	1.17	15	4.03	2.58	0.984	3.9		0.38	2.6	10	119	0.553	1.97	0.859	30.7	3.21	179	0.189	0.717
REYNOLDS, 2000	WASVNTR-2-027-011	GL	EPRR26	-103.803	12.095	50.6336	1.389	9.66894	8.26405	14.5301	12.3054	2.50945	0.0796171	0.123961	0.177375	60.6061	1366.18	1.25362	1605.07	0.831661	8327.06	6.9				371		76													94				42.5		111
LE ROUX, 2000; LE ROUX, 2001	EWI9309-044-006	GL	MARR227	-16.792	-40.862	49.9605	1.38866	10.0403	8.48907	14.7159	12.0498	2.64612	0.079922	0.139864	0.169834	60.3473	1384.95	1.46027	1654.33	0.84902	8325.02	13.1		9.35					5.75	3.4	1.18		5			3.48			2.45	9.71	86			1.02	49	3.21	101	0.17
REYNOLDS, 1992	WASVNTR-008-B	GL	EPRR26	-103.848	12.1167	50.3825	1.38852	9.8193	8.22441	14.706	12.2229	2.50512	0.0746529	0.161798	0.202772	60.1218	1374.13	1.32744	1618.25	0.828267	8324.18	5.8																									99
FERGUSON, 1993	EWI9202-002-007-G1	GL	PARR38	-171.615	-64.44	51.2538	1.38742	9.71228	8.1137	14.2887	12.09	2.52672	0.0503331	0.120799	0.181199	60.0596	1364.88	1.1892	1602.45	0.819394	8317.58	4.2				255		88													78				40.5		84
Sun et al., 2008	1322/33	GL	MARR171	-13.15	-1.18	49.9876	1.386	9.287	8.07958	15.7157	11.17	2.724	0.077	0.0971007		61.0285	1352.52	1.24132	1452.23	0.755118	8309.07	8.44113		9.2599					4.61782	2.84426	1.19401	17.8238	3.84021	2.05192		2.60272	6.25698	0.392165	1.83023	8.70579		0.428786		0.810001	34.9989	3.00039	125.318
INGLE, 2010	EWI0004-092-001	GL	GALA6	-97.782	2.192	49.9118	1.38599	9.47948	9.28143	14.8789	12.088	2.27598	0.079409	0.111575	0.188973	63.7995	1360.51	1.25073	1578.73	0.856054	8309.01	11.1		8.94	47.5	355			4.86	3.12	1.06		3.98	2.29	1.14	3.02		0.488	2.4	8.77	135	0.3276	1.66	1.16	43.8	3.1	82.4	0.16	0.774
Gale et al., this study	HLY0102-050-044	GL	GAKK11	36.9442	86.3367	49.6047	1.38569	7.86909	8.20993	16.9337	11.1382	3.42787	0.364744	0.205368	0.113582	65.2532	1294.5	1.16213	1183.36	0.718565	8307.21	60.9748	0.793204	16.9856	41.8597	296.077	0.0515346	68.4726	4.44924	2.70453	1.21524	15.9342	4.11	2.45047	0.94404	6.27147	4.92189	0.3731	8.39897	11.6023	145.953	0.747211	2.41903	4.54278	33.3677	3.35268	210.335	0.522792	0.710712
Arevalo and McDonough (2008)	ALV2706-007		EPRR29	255.762	9.538	50.97	1.38525	9.2	8.06	15.39	12.23	2.52	0.0890803	0.11	0.19	61.1945	1343.97	1.13339	1474.8	0.778823	8304.57	4.70847		8.49868		279.57			5.17101	3.31196	1.13205		4.22162	2.23763	1.10311	2.67588		0.471695	1.54294	8.40099		0.409822	1.48082		41.7585	2.98292	125.553	0.115743	0.776046
LE ROUX, 2000	EWI9309-041-013	GL	MARR232	-16.17	-43.427	50.2195	1.38507	10.1811	8.53936	14.7163	11.5126	2.71749	0.0996447	0.119574	0.159432	60.1553	1388.54	1.4749	1640.48	0.83684	8303.49	15.1		8.94					5.36	3.4	1.19		4.44			3.36			2.27	8.68	109			1.45	45	3.32	100	0.17
Arevalo and McDonough (2008)	KNO0115-002-001		MARR116	315.27	26.27	50.05	1.38433	9.21405	9.24	15.3	11.3	2.61	0.0954032	0.14	0.17	64.3503	1347.38	1.2234	1477.59	0.817426	8299.06	6.53576		10.1158					4.87256	3.09874	1.1308		4.18971	2.2472	1.06064	2.66054		0.467172	1.93215	8.52359		0.584042	1.62014			2.95565	105.252	0.127274	0.762177
Gale et al., this study	DUF0023-004	GL	SEIR1	70.323	-25.864	50.0705	1.38272	7.77147	9.38632	16.7238	10.2038	3.56276	0.0908353		0.32297	68.4943	1284.47	1.0809	1177.37	0.737884	8289.41		0.83	12.103	41.4	365	0.00365	64.4	4.71	2.93759	1.258	16.19	3.95808	2.675	1.029	3.574	5.65	0.411	1.585	10.915	187.6	0.398	2.115			3.442	183.094	0.108	0.745
LAWSON, 1996	DAR0057-032-001-2C	WR	MARR119	-46.137	24.63	49.9909	1.38205	9.26982	8.7967	15.833	11.1321	2.79436	0.126099	0.121055	0.166451	63.0742	1349.31	1.28945	1440.7	0.784167	8285.39	11.55		10.36	44.76	353	0.013	68.06	4.88	3.02	1.18	15.29	3.98	2.44	1.03	3.33		0.46	2.65	9.27	180.37	0.525	1.71	1.19	35.98	3.12	135.5	0.182	0.74
Gale et al., this study	HLY0102-051-025	GL	GAKK11	43.5492	86.555	49.3593	1.38101	8.00408	8.67941	17.3578	11.1185	3.07	0.221395	0.183224	0.0947258	66.1232	1299.03	1.14619	1203.98	0.718959	8279.15	22.2357	0.748804	13.764	40.1571	299.185	0.020885	73.0287	4.56125	2.68842	1.24194	16.2606	4.24373	2.61811	0.957942	4.83341	5.11584	0.396058	4.53978	11.1156	142.43	0.556922	2.19964	1.66992	33.158	3.33026	220.497	0.283127	0.716831
REYNOLDS, 2000	WASVNTR-2-027-C	GL	EPRR26	-103.803	12.095	50.4997	1.37945	9.70611	8.09675	14.884	12.1351	2.51899	0.0799679	0.189924	0.189924	60.0247	1368.02	1.28404	1581.35	0.810552	8269.8																										111
LE ROUX, 2000	EWI9309-015-004	GL	MARR249	-6.428	-50.578	50.9363	1.37944	10.1858	8.49435	13.9022	11.8512	2.43385	0.138935	0.129011	0.138935	60.0175	1386.05	1.33133	1681.68	0.855575	8269.74	23		10.4					4.8	2.89	1.1		4.1			4.38			4.43	8.8	90	0.38		2.08	44	3.04	96	0.25
PYLE, 1994	MOA8801-017-003	GL	SEIR68	127.417	-50.222	51.0793	1.37883	8.63664	8.63866	15.0223	11.8441	2.84259	0.0302403	0.120961	0.161282	64.2911	1319.66	1.01409	1414.71	0.796085	8266.09	3.1				361		72.8													101				36		106
DAVIS, 2008	WFL2002-455-R9	WR	JUAN15	-126.89	42.4914	49.6235	1.37815	8.78819	8.72712	16.302	11.9427	2.53808	0.0800367	0.13006	0.170078	64.1255	1332.01	1.1823	1398.14	0.776482	8262.01	9.1		9.12		341		58	5.22	3.22	1.14	16	4.44	2.32	1.11	3.04		0.49	2.01	8.82	128	0.36	1.6	0.94	38.6	3.21	111.1	0.14	0.79
FERGUSON, 1993	EWI9202-002-004	GL	PARR38	-171.615	-64.44	51.2437	1.37753	9.70706	8.1572	14.2846	12.0646	2.53779	0.0503531	0.120847	0.181271	60.2007	1365.01	1.19266	1601.81	0.820937	8258.29	4.3				268		71												9.19	84			0.33	40.7	3.37	94
Gale et al., this study	NHOCHEP-024-007	GL	EPRR25	-103.913	12.673	49.3107	1.37588	8.28541	8.71725	16.6712	11.6799	2.8321	0.230987	0.190815	0.160687	65.4436	1311.79	1.16746	1289.46	0.759013	8248.4	26.546	1.02	15.522	40.2	321	0.027	73.1	4.773	2.95827	1.293	16.71	4.24638	2.787	1.022	5.92	5.18	0.403	6.147	11.547	122.4	0.68	2.39	2.294		3.35	201.13	0.375	0.754
Gale et al., this study	CHRCLIP-001-001A	GL	EPRR25	-103.93	12.75	50.1285	1.37311	9.25838	8.11749	15.4273	11.9743	2.80679	0.161542		0.121156	61.2131	1351.59	1.28234	1482.33	0.792566	8231.79	16.162	0.78	11.76	41.4	347	0.01356	80.7	5.235	3.27158	1.22	16.71	4.37286	2.515	1.116	4.195	6.21	0.453	3.808	10.54	103.2	0.388	1.978	1.413		3.37	155.641	0.251	0.793
Kelley, Kingsley, and Schilling, in revision	CON2806-013-003	GL	MARR170	-15.919	-1.365	50.3696	1.3724	10.1519	8.63437	14.7317	11.193	2.67531	0.148895	0.129043	0.168748	60.4889	1385.31	1.43708	1609.11	0.827546	8227.54	23.5		12.27	40.98	308.4	0.034	72.5	5.28	3.25	1.2	16.59	3.98	2.22	1.16	3.9	4.07	0.47	4.023	10.53	139.7	0.38	2.04	2.26	35.63	3.42	122.2	0.2771	0.786
Kelley, Kingsley, and Schilling, in revision	END0026-006-001	WR	MARR19	-5.43	71.33	46.8843	1.37164	7.18322	10.5954	15.4856	12.8119	2.15685	1.11322	0.377698	0.140146	72.6405	1283.97	1.17979	1208.8	0.916806	8222.98			49.37	40.9	345	0.401	69.7	3.56	1.87	1.58	16.9	4.45	2.657	0.718	25.14		0.259		22.88	159.8	1.585	5.73		36.4	4.53	506.7		0.629
MAHONEY, 2002	MELWEST-10-071-001	GL	SEIR32	90.795	-42.886	50.5933	1.37015	9.07512	8.00162	15.5191	11.8591	2.80379	0.123026	0.136916	0.131955	61.3463	1340.99	1.18086	1440.01	0.770575	8214.05															3.26			2.3	9.45		0.448				3.3	139
REYNOLDS, 1997	KNO0115-021-B	GL	MARR122	-44.99	23.08	49.6546	1.37006	9.61057	8.19014	15.9874	11.5145	2.86101	0.117865	0.146073	0.172265	60.5361	1366.74	1.43626	1494.57	0.778886	8213.51	7.6				337		78													96				37.7		137
LE ROUX, 2000	EWI9309-041-012	GL	MARR232	-16.17	-43.427	50.2503	1.36773	9.92303	8.51513	14.8707	11.5655	2.70335	0.109829	0.139782	0.189704	60.7013	1377.04	1.39918	1593.2	0.825541	8199.54	16.8		9.42					5.33	3.37	1.19		4.97			3.44			2.27	9.52	102	0.2		1.5	42	3.3	102
Gale et al., this study	HLY0102-061-003	GL	GAKK7	85.05	85.635	49.3572	1.36711	8.05879	8.72874	17.3751	10.9638	3.23338	0.167215	0.155655	0.141305	66.0975	1301.55	1.18309	1211.83	0.720707	8195.82	13.6015	0.67853	12.8621	41.8648	278.074	0.0202439	65.9489	4.43372	2.784	1.30132	16.125	4.09082	2.73498	0.933514	3.97517	5.73315	0.372151	2.799	10.9285	145.982	0.660892	2.10947	0.860435	31.4962	3.22533	215.783	0.211703	0.692425
Kelley, Kingsley, and Schilling, in revision	AII0107-7-006-020	GL	MARR228	-16.603	-41.248	49.7707	1.36508	9.64932	8.1094	15.7915	11.711	2.82477	0.0998419	0.149763		60.2028	1369.1	1.41537	1523.22	0.785794	8183.65	14.18		9.66	42.7	317.9		75.7	5.22	3.4	1.094	15.06	4.11	1.79	1.166	2.9	4.26	0.482	2.364	8.76	119.6	0.421	1.64	1.16	36.76	3.07	112	0.159	0.784
DAVIS, 2008	WFL2002-455-R8	WR	JUAN15	-126.889	42.492	49.6176	1.3636	8.92228	8.73091	16.2413	11.8956	2.51976	0.0797871	0.129654	0.179521	63.7864	1337.16	1.20783	1415.92	0.779832	8174.78	9.8		9.06		335	0.01	57	5.21	3.16	1.12	14	4.28	2.29	1.1	3.06		0.5	2.03	8.71	129	0.35	1.6	0.98	38.9	3.23	109.8	0.14	0.8
LE ROUX, 2000	EWI9309-041-003	GL	MARR232	-16.17	-43.427	50.9446	1.36319	10.0565	8.50821	14.6224	11.223	2.60615	0.0902249	0.110275	0.14035	60.3627	1378.08	1.31897	1597.58	0.814067	8172.32	15.1		8.86					5.27	3.26	1.12		4.36			3.15			2.26	8.42	110			1.32	42	2.98	97	0.15
Gale et al., this study	WASPLUM-5-054-001	GL	MARR214	-14.523	-33.967	50.3533	1.36163	9.02522	8.39555	15.6217	11.8474	2.74787	0.0689634	0.104944	0.16991	62.6087	1338.9	1.17928	1443.19	0.78309	8162.97	8.911	0.54	8.322	40.4	360	0.0104	75.8	4.672	2.90037	1.075	14.28	3.80928	2.249	1.012	2.444	6.19	0.458	1.507	8.354	109	0.561	1.503	0.781	36.2	2.945	104.667	0.105	0.718
LE ROUX, 2000; LE ROUX, 2001	EWI9309-041-011	GL	MARR232	-16.17	-43.427	50.2474	1.36158	9.79137	8.55114	14.918	11.635	2.69177	0.121055	0.151318	0.151318	61.1198	1372.08	1.36658	1575.68	0.82449	8162.67	14.2		9.04					5.06	3.19	1.17		4.96			3.26			2.18	8.59	112			1.33	43	3.04	98
DANYUSHEVSKY, 2000	MOA8801-017-018	GL	SEIR68	127.417	-50.222	49.9613	1.36064	9.08837	8.95017	15.4537	11.734	2.90846	0.0298414	0.129313	0.13926	63.9331	1343.12	1.25534	1479.43	0.81886	8157.04	1.766	0.32	7.75					4.53	2.81	1.15	17	3.77	2.07		1.92	5.65	0.398	0.69	8.11				0.185	33.8	2.87	103.9	0.056
Gale et al., this study	HLY0102-078-004	GL	GAKK10	51.72	86.8292	49.7456	1.36018	8.38083	8.67958	16.6985	11.0062	3.20245	0.17097	0.163788	0.134761	65.0858	1313.26	1.19348	1275.72	0.742597	8154.28	20.9112	0.467425	12.0668	43.7586	330.654	0.0210754	74.8305	4.65494	2.83388	1.19323	15.7531	4.11087	2.38161	0.984148	4.16619	5.38512	0.408595	3.6525	9.74141	190.205	0.55369	1.94813	1.54334	34.8528	3.16444	170.608	0.241499	0.729082
Gale et al., this study	VEM0033-1-005-005	GL	SEIR67	127.08	-48.74	50.5437	1.35915	8.71206	8.18747	15.7922	11.7585	2.93704	0.0795266	0.149112		62.8476	1325.45	1.11074	1384.79	0.761941	8148.1	7.52		9.11	39	393	0.0113	72	4.68	2.86	1.14		3.81	2.23	1.04	2.89		0.42	1.42	8.89	121		1.63	0.59	35.2	3.09	135		0.73
KARSTEN, 1996;STURM, 1999	KNO0138-11-020-001	GL	CHIL27	-75.8967	-46.0405	51.2255	1.35886	8.78775	8.0393	15.1206	11.6706	2.87478	0.17047	0.135165	0.163409	62.217	1325.87	1.05625	1391.85	0.76723	8146.37			10.45		320		66	4.95	2.97	1.1		4.27	2.38	1.08	3.55		0.45		9.33	98	0.767	1.75		37.4	3.06	133	0.166	0.808
Sun et al., 2008	TAG-501	GL	MARR116	-44.83	26.24	50.8428	1.358	9.202	8.236	15.5742	11.184	2.676	0.081	0.135849		61.7011	1343.44	1.13296	1429.62	0.754004	8141.21	8.89232		10.0117					5.32622	3.2668	1.23894	17.9246	4.37716	2.36572		3.03544	6.75309	0.477951	2.22188	9.49039		0.489882		1.00655	36.0555	3.30743	123.732	0.141965
REYNOLDS, 2000	WASVNTR-2-008-002	GL	EPRR26	-103.849	12.1117	50.7952	1.35739	9.83015	8.24217	14.3999	12.1819	2.50893	0.0695244	0.127965	0.183383	60.1471	1372.49	1.27517	1626.2	0.832733	8137.55	5.8				361		75													91				40.8		101
Gale et al., this study2	WASVNTR-008-002	GL	EPRR26	-103.848	12.1117	50.7952	1.35739	9.83015	8.24217	14.3999	12.1819	2.50893	0.0695244	0.127965	0.183383	60.1471	1372.49	1.27517	1626.2	0.832733	8137.55	5.81574				361.308		75.0626													91.2053				40.82		101.178
SIMS, 2003	ALV2746-004	GL	EPRR29	-104.288	9.81537	50.2311	1.35544	9.3984	8.29212	15.2288	12.0595	2.63115	0.109631	0.149497	0.179397	61.362	1356.41	1.26687	1520.32	0.80532	8125.86	8		9.2					4.9	2.9	1.2		4.5	2.2	1.1	3.1		0.46	2.5	7.48	81		1.7	0.9		2.61	122		0.77
MAHONEY, 2002;CHRISTIE, 2004	MELWEST-10-078-002	GL	SEIR34	94.833	-44.833	50.7215	1.3554	8.74737	8.0772	15.5063	11.9999	2.78604	0.146475	0.113368	0.127413	62.4356	1326.42	1.08882	1395.53	0.769159	8125.62			9.41	40.5	321		55.6	4.25	2.64	1.08			2.1	0.944	3.08		0.375	2.42	8.38	94.7	0.401	1.63		34.3	2.85	131.1	0.152	0.672
Kelley, Kingsley, and Schilling, in revision	EWI9309-041-001	GL	MARR232	-16.08	-44.02	50.111	1.35364	9.91308	8.61347	15.1138	11.4716	2.70508	0.0995477	0.129412	0.139367	60.9987	1376.84	1.41287	1580.25	0.820515	8115.07	21.3		11.16	45.69	354.5	0.027	68.6	5.88	3.82	1.224	16.96	4.72	2.07	1.31	3.49	6.98	0.531	2.426	9.89	138.4	0.504	1.82	1.77	41.93	3.46	120	0.1586	0.914
DAVIS, 2008	WFL2002-455-R11	WR	JUAN15	-126.891	42.491	49.7945	1.35357	8.58497	8.99683	16.1076	11.9983	2.49743	0.0703581	0.120614	0.17087	65.3542	1321.71	1.09934	1381.58	0.787631	8114.65	8.2		8.64		352		60	5.07	3.09	1.1	16	4.29	2.2	1.08	2.85		0.48	1.89	8.41	133	0.33	1.54	0.87	39.2	3.11	106.3	0.13	0.77
Gale et al., this study	MOA8801-026-001	GL	SEIR65	124.282	-48.943	50.9585	1.35324	8.60417	8.03864	16.36	10.9269	3.02964	0.0908891	0.141383	0.161581	62.7101	1317.18	1.07272	1292.98	0.70916	8112.67	6.182	0.65	10.167	38.4	308	0.00722	54.8	5.638	3.44942	1.269	16.88	4.5477	2.639	1.186	3.093		0.481	1.752	9.849	106.5	0.623	1.805	0.495	32.6	3.577	109.094	0.12	0.835
Sun et al., 2008	TAG-3380	GL	MARR117	-45.04	25.91	50.6457	1.353	8.798	8.09489	15.763	11.175	2.573	0.063	0.104011		62.3515	1327.35	1.02264	1366.31	0.731046	8111.23	5.48224		8.52696					5.20064	3.2158	1.21448	17.4684	4.31349	2.23113		2.46691	5.97566	0.461994	1.52968	8.64953		0.429494		0.561639	35.2303	3.15389	106.712	0.107615
Kelley, Kingsley, and Schilling, in revision	EWI9309-019-003	GL	MARR249	-6.16	-51.062	50.5198	1.35076	9.65085	8.0708	14.5751	12.1892	2.61162	0.228473	0.10927	0.149004	60.0846	1366.8	1.30068	1571.12	0.824683	8097.81	54.3		15.58	41.6	340.1	0.053	92.6	4.39	2.64	1.133	15.93	3.94	1.72	0.95	6.32		0.383	6.76	10.45	85.2	0.54	2.17	3.76	40.17	3.13	164.8	0.4373	0.656
MAHONEY, 2002;CHRISTIE, 2004	MELWEST-10-144-004	GL	SEIR53	115.212	-50.008	51.2254	1.35038	8.43379	8.2003	15.6759	11.4812	2.92211	0.126345	0.0849039	0.112194	63.6386	1310	0.988351	1317.24	0.74375	8095.53	16		10.25	38.3	321.1		52.4	4.51	2.81	1.06			2.19	0.991	3.55		0.407	3.06	8.91	115.3	0.514	1.73	1.44	33.7	2.96	117.7		0.696
Sun et al., 2008	88550/4	GL	MARR121	-44.96	23.37	50.5626	1.349	8.748	8.204	15.998	11.426	2.82424	0.149	0.0924964		62.7985	1325.68	1.10406	1353.71	0.744995	8087.26	6.16747		10.7641					4.56484	2.73408	1.18811	16.7138	3.89964	2.14555		3.35411	5.42449	0.388811	2.40505	9.20353		0.475923		0.55132	33.3949	3.01937	154.397	0.158073
Sun et al., 2008	TAG-6-5	GL	MARR116	-44.81	26.14	50.4995	1.348	8.869	8.533	15.928	11.338	2.76028	0.11	0.142079		63.3942	1329.93	1.11945	1379.59	0.759628	8081.26			9.53737					4.80051	2.94649	1.17411	17.5449	3.9629	2.11572		2.96201		0.427657	2.3277	8.71731		0.358294			35.7849	3.01656	133.435	0.144599
Gale et al., this study	HLY0102-079-028	GL	GAKK10	49.6558	86.8317	49.8256	1.34638	8.06388	8.53232	16.7701	11.0295	3.24656	0.251748	0.192745	0.162785	65.5714	1299.98	1.13307	1218.68	0.729096	8071.55	30.7136	0.694249	13.0308	43.6015	520.719	0.0324981	70.1003	4.60109	2.73336	1.14275	15.1973	4.21773	2.52484	0.969199	4.70029	5.32903	0.398151	5.36057	10.5796	226.998	0.540668	2.08297	2.63851	31.721	3.17162	174.253	0.327608	0.713567
LE ROUX, 2000	EWI9309-041-005	GL	MARR232	-16.17	-43.427	50.85	1.3456	9.98193	8.68517	14.5099	11.3049	2.60163	0.0890604	0.138538	0.15833	61.0313	1375.45	1.30711	1601.08	0.827092	8066.87	14.3		8.86					4.91	3.33	1.16		4.76			3.27			2.15	8.48	102	0.25		1.23	42	3.13	97
CHRISTIE, 2004	MELWEST-10-143-002	GL	SEIR53	114.951	-49.951	50.9914	1.34387	8.10606	8.38301	16.1205	11.4244	2.83119	0.153415	0.129506	0.085673	65.0533	1296.62	0.935484	1253.32	0.729359	8056.5	18.6		11.32	38	325.3		54.4	4.53	2.89	0.984			2.45	0.96	3.98		0.446	3.27	9.29	133.9	0.549	1.84	1.6	32.9	3.04	115		0.67
Arevalo and McDonough (2008)	CHRRODR-2-003		SEIR1	70.054	-25.66	50.1784	1.34375	8.404	8.08902	17.2744	10.1486	3.79035	0.108008	0.03821	0.13076	63.404	1311.92	1.24018	1218.04	0.685845	8055.78	14.9923		11.2372		282.904			4.9159	3.21884	1.2305		4.29664	2.23353	1.05002	3.49666		0.419271	2.03145	10.0724		0.70423	1.87033		32.0874	3.21074	125.735	0.139425	0.757141
Sun et al., 2008	88562	GL	MARR121	-44.94	23.37	49.9333	1.343	8.52	8.423	15.953	11.61	2.66229	0.102	0.100187		64.0224	1319.99	1.06688	1353.71	0.757271	8051.28	4.73045		9.79714					4.59281	2.77814	1.13235	17.3784	3.87082	2.15053		3.01244	5.51004	0.397954	2.03866	8.74321		0.451911		0.467202	34.447	3.0246	141.817	0.135401
LE ROEX, 1989	MELPROT-5-037-003	WR	SWIR35	45.76	-40.13	47.2107	1.34298	7.73129	8.01114	16.5469	13.2408	2.87868	0.964798	0.278498	0.139249	65.0979	1306.47	1.38594	1229.83	0.806602	8051.17	242		48	41	208		87	3.78	2.19	1.43		4.34		0.76	26.3		0.27	32	19.8	106		5.29	16.2	31	4.23	372
REYNOLDS, 1997	KNO0115-018-B	GL	MARR122	-45	22.928	49.2407	1.34201	9.60598	9.29318	15.973	11.1296	2.66384	0.0948489	0.138237	0.17759	63.5221	1366.63	1.44037	1502.13	0.814116	8045.35	5.4		9.81		309		69	4.74	3.01	1.12		4.09					0.46		8.45	150				36.8	2.95	118
DAVIS, 2008	WFL2002-455-R10	WR	JUAN15	-126.891	42.491	49.816	1.34112	8.6324	8.88911	16.1922	11.9794	2.4935	0.0702474	0.120424	0.160565	64.9557	1323.87	1.1099	1381.18	0.78059	8040.01	8.3		8.55		356		56	5	3.05	1.07	18	4.21	2.22	1.05	2.83		0.48	1.87	8.29	131	0.33	1.53	0.91	39.4	3.07	104.7	0.14	0.76
HEKINIAN, 1987;CHAUSSIDON, 1994	CYA1978-010-019	GL	EPRR14	-109.02	20.89	50.3355	1.34053	9.57927	8.06336	15.2801	12.0749	2.67099	0.0614831	0.124982	0.177394	60.241	1364.15	1.3082	1545.19	0.797673	8036.48	8.9				332		77.4													84.7				41.3		110
Gale et al., this study	MOA8801-005-001	GL	SEIR67	126.52	-48.68	50.19	1.34	8.316	8.06	15.96	11.04	2.96	0.12	0.14	0.16	63.5647	1310.28	1.03927	1287.78	0.724501	8033.3	14.174	0.68	10.55	37.3	308	0.01661	60.6	5.198	3.23642	1.233	16.33	4.21383	2.495	1.093	3.488		0.441	2.655	9.617	110.8	0.505	1.842	1.541	30	3.403	127.754	0.173	0.766
LE ROUX, 2000	EWI9309-041-010	GL	MARR232	-16.17	-43.427	50.2603	1.33995	9.96866	8.46824	15.0512	11.4965	2.61006	0.110025	0.140032	0.190043	60.4599	1379.22	1.39979	1583.95	0.813944	8033	15.8		9.18					5.33	3.32	1.18		4.31			3.31			2.5	8.96	107			1.3	43	3.19	99
REYNOLDS, 1997	KNO0115-017	GL	MARR121	-44.975	23.195	49.6862	1.33987	9.55038	8.60341	15.9979	11.2126	2.88123	0.0916756	0.130965	0.169247	61.8542	1363.42	1.41472	1480.95	0.785373	8032.52	5.6				335		68													127				35.4		133
LE ROUX, 2000	EWI9309-040-008	GL	MARR232	-15.908	-44.41	50.6237	1.33795	9.50808	8.69333	14.8846	11.4892	2.73353	0.0998734	0.139823	0.139823	62.2036	1357.61	1.249	1527.43	0.81648	8021.01	20.4		9.02					5.21	2.97	1.05		4.5			3.29			2.37	8.84	128	0.7		1.62	42	3.01	107
LE ROUX, 2000	EWI9309-012-007	GL	MARR247	-8.003	-49.757	50.3586	1.33753	9.79945	8.62106	14.5958	12.1237	2.50664	0.0502991	0.130778	0.201196	61.2936	1372.24	1.31328	1624.36	0.84554	8018.49	6.89		7.34					4.36	2.77	1.16		4.17			2.3			1.38	7.62	88			0.44	44	2.66	90	0.1
Gale et al., this study1	AII0129-7-R039	GL	MARR121	-44.927	23.383	50.3598	1.33742	8.85289	8.50496	15.8383	11.3433	2.91034	0.121666	0.188221	0.161217	63.36	1330.7	1.1669	1380.94	0.766831	8017.83	5.173		10.503			0.00502		5.239	3.3088	1.285		4.27707	2.467	1.13	3.387		0.466	2.447	9.881		0.147	1.79	0.464		3.302	142.086	0.169	0.808
Gale et al., this study	AII0127-1-017-A	GL	MARR85	-31.518	37.836	48.7867	1.33627	7.4835	8.32835	15.9479	13.6139	2.2516	0.662178	0.244221	0.144944	66.7023	1285.42	0.985365	1245.78	0.80275	8010.94	244.408		32.626			0.23706		3.793	2.11246	1.195		3.83067	2.31	0.757	16.667		0.306	28.193	16.18			3.962	18.809		3.551			0.64
DAVIS, 2008	WFL2000-187-R10	GL	JUAN15	-126.812	42.618	50.6073	1.33487	9.2694	8.01979	15.3606	12.131	2.61743	0.0799083	0.109874	0.149828	60.8969	1349.63	1.19197	1490.63	0.783185	8002.55	9.7		7.64			0.01		4.52	2.84	0.99		3.74	1.94	0.98	2.6		0.44	2.06	7.21		0.31	1.33	0.95	42.3	2.69	110.6		0.69
BENDER, 1984; RYAN, 1987; RYAN, 1993	GIL7904-006-023	GL	EPRR11	-108.31	22.6	49.857	1.33431	9.7752	8.4747	15.2527	12.409	2.28998	0.0503088	0.130803	0.150926	60.9455	1373.78	1.34111	1605.53	0.826528	7999.19			6.64		416			5.04	3.21	1.08		3.85				5.45		1.4	7.24	120					2.8	83
Gale et al., this study	NHOCHEP-015-006	GL	EPRR25	-103.888	12.85	49.0075	1.33429	8.90863	8.53744	16.7538	11.6876	2.85919	0.160516	0.150484	0.160516	63.3028	1340.81	1.35647	1380.66	0.766957	7999.07	15.351	0.86	12.437	41.6	322	0.01609	80.3	4.722	2.98412	1.214	16.69	4.12827	2.498	1.024	4.48	5.63	0.422	3.887	10.103	107.5	0.582	1.985	1.332		3.037	172.731	0.255	0.739
DANYUSHEVSKY, 2000	MOA8801-017-001	GL	SEIR68	127.417	-50.222	49.9839	1.33347	9.10381	9.00759	15.3615	11.7671	2.84349	0.0399007	0.129677	0.169578	64.0414	1344.49	1.2509	1485.78	0.823756	7994.15	1.754	0.33	7.6					4.72	2.86	1.16	16.3	3.86	2.13		1.93	5.55	0.409	0.71	8.13				0.18	34.5	2.92	103.4
Gale et al., this study	HLY0102-R019	GL	GAKK11	43.195	86.5467	49.7376	1.33327	7.99686	8.39179	17.0995	11.2472	3.13694	0.21663	0.163189		65.3847	1297.48	1.10195	1209.53	0.715821	7992.95	23.1554	0.745522	13.4398	39.3431	290.824	0.0192698	73.327	4.44847	2.63154	1.21183	16.3475	4.06657	2.50864	0.946667	4.73937	4.92841	0.37562	4.36955	10.7423	135.694	0.620368	2.12302	1.69573	33.9895	3.16417	225.156	0.27824	0.693401
Gale et al., this study	NHOCHEP-021-001	GL	EPRR25	-103.935	12.781	49.0783	1.33299	8.68464	8.47257	17.0663	11.5122	2.86795	0.181772	0.171673	0.161575	63.7161	1329.98	1.29621	1322.97	0.743753	7991.28	17.344	0.92	13.143	41.6	318	0.01984	78.9	4.702	2.91898	1.223	16.45	4.03248	2.529	1.017	4.793	5.55	0.416	4.354	10.259	110.9	0.665	2.029	1.511		3.038	185.258	0.275	0.743
Gale et al., 2011	AII0127-1-R048	GL	MARR85	-31.503	37.889	48.7459	1.33273	7.86279	8.13191	15.78	13.632	2.32906	0.636187	0.226573	0.158305	65.0546	1302.16	1.08311	1306.76	0.811577	7989.72	215.835		29.386			0.20618		3.612	2.16726	1.268		3.56097	2.202	0.745	15.008		0.304	25.561	15.084		0.767	3.63	16.521		3.302	273.637	1.411	0.76
Gale et al., this study	GIL7904-011-019	GL	EPRR11	-108.4	22.53	49.9483	1.33214	9.87587	8.49908	15.0909	12.3822	2.27907	0.0398724	0.109649		60.7699	1377.51	1.33807	1631.61	0.83276	7986.18	2.388	0.38	6.473	45.7	369		80	5.129	3.29329	1.074	16.74	3.99249	2.259	1.123	1.674	5.73	0.483	0.801	7.472	109.8	0.256	1.246	0.246		2.82	71.547		0.769
Gale et al., this study	POL0059-293-037	GL	GAKK10	58.555	86.9108	49.76	1.33182	7.83741	8.4289	17.2671	11.0857	3.32197	0.180398	0.178207	0.136867	65.9383	1290.28	1.10204	1179.03	0.708065	7984.26	19.5218	0.687648	12.3425	38.8222	278.053	0.0208488	71.2718	4.5849	2.70906	1.1629	15.9293	4.17822	2.51767	0.965943	4.11883	5.26068	0.396061	3.6268	10.5666	136.482	0.529526	2.04516	1.50014	33.3086	3.19745	202.09	0.228111	0.713585
FRETZDORFF, 2002	JCR039B-R048	GL	BSCO4	-30.14	-57.42	49.83	1.33	8.26	8.13	15.3	11.6	3.29	0.1	0.26	0.18	63.9207	1312.25	1.1101	1349.89	0.776511	7973.35	19		14.3	34.2	207	0.026	48.8	6.23	3.6	1.41	16.2	5.22	3.55	1.3	4.9		0.52	2.91	12.4	82.5		2.45	2.5	31.9	4.07	143	0.194	0.929
MAHONEY, 2002;CHRISTIE, 2004	MELWEST-10-130-001	GL	SEIR50	111.135	-49.781	50.6317	1.32632	8.59687	8.07465	16.2818	11.4097	3.05124	0.0791245	0.0998946	0.128577	62.8344	1319.71	1.11258	1324.64	0.731317	7951.29	9.51		9.25	42.1	310.6		63.8	4.61	2.87	1.1			2.19	0.998	2.9		0.416	1.8	8.77	132.8	0.478	1.66	0.85	34.4	2.95	132.8	0.118	0.707
Gale et al., this study	DUF0034-003	GL	SWIR41	49.882	-37.71	50.4047	1.32607	10.6316	9.11143	14.3289	11.5231	2.00064	0.0596057	0.127159		60.6706	1404.66	1.41101	1736.44	0.86247	7949.79	6.739	0.53	6.279	46.9	333	0.00667	115.5	5.509	3.52387	1.038	16.96	3.92832	2.02	1.195	1.805	8.35	0.504	1.295	6.972	131.8	0.266	1.176	0.61		2.74	68.82	0.077	0.796
MAHONEY, 2002;CHRISTIE, 2004	MELWEST-10-092-001	GL	SEIR39	98.943	-48.101	50.4805	1.32529	8.8205	8.3107	15.4194	12.0973	2.75018	0.144954	0.108469	0.122274	62.9075	1330.66	1.12318	1421.75	0.788421	7945.11	21.2		9.1	41.9	343.7		58.9	4.46	2.75	1.08			2.07	0.952	3.08		0.395	3.13	8.47	89.1	0.493	1.58	1.53	34.9	2.9	122.2	0.192	0.679
MAHONEY, 2002;CHRISTIE, 2004	MELWEST-10-084-007	GL	SEIR35	95.932	-45.111	50.9039	1.32441	8.6191	8.12332	15.5591	11.7269	2.99259	0.127175	0.11724	0.114259	62.9144	1319.51	1.06887	1363.03	0.761416	7939.84	13.6		10.54	43.1	355		62.4	4.88	3.01	1.19			2.4	1.04	3.41		0.429	2.74	9.69	99	0.467	1.86	0.963	36.6	3.26	151.6	0.173	0.75
Gale et al., this study	NHOCHEP-005-005	GL	EPRR23	-104.156	13.753	50.7466	1.32374	8.52746	8.70046	15.4781	11.6174	2.93704	0.0694025		0.158922	64.7455	1316.25	1.05085	1368.22	0.782286	7935.82	6.7				393		71													131				35.2		132
Gale et al., this study	ALV1410-003-B	GL	JUAN11	-130.16	45.22	49.9662	1.32341	9.70098	8.42292	15.288	12.1444	2.34685	0.118834	0.128737		60.9811	1370.04	1.31387	1570.5	0.814528	7933.84	11.428	0.54	8.773	43.3	373	0.00894	72.6	4.632	2.94173	1.055	16.47	3.74883	2.028	1.005	3.028		0.43	2.933	7.903	96.7	0.36	1.496	0.882	43.4	2.811	122.333	0.197	0.711
Gale et al., this study	NHOCHEP-016-002	GL	EPRR25	-103.958	12.832	49.9116	1.32243	9.54753	8.27519	15.5285	12.1223	2.60478	0.0921692	0.0771416	0.180331	60.9394	1364.59	1.34697	1535.55	0.803577	7927.97	10.9						82													94				41		118
DAVIS, 2008	WFL2000-RC18	GL	JUAN15	-126.747	42.743	49.5672	1.32204	8.90847	8.20054	16.3834	11.9991	2.69564	0.169477	0.139569	0.159508	62.363	1338.8	1.26005	1394.07	0.762588	7925.63	42.9		11.83			0.04		4.63	2.88	1.1		3.91	2.18	0.98	4.84		0.44	5.95	9.02		0.45	1.85	3.85	37.6	3.07	141.6	0.36	0.71
DAVIS, 2008	WFL2000-187-R11	GL	JUAN15	-126.809	42.618	49.8384	1.32134	9.07518	8.07232	15.8984	12.0716	2.70462	0.199279	0.139495	0.179351	61.5546	1344.75	1.26624	1431.97	0.775815	7921.43	14.8		8.18			0.02		4.49	2.81	1		3.62	1.89	0.95	2.96		0.43	2.58	7.38		0.27	1.38	1.38	41.5	2.69	103	0.18	0.68
BENDER, 1984; WALLACE, 1992; RYAN, 1987	GIL7904-012-005	GL	EPRR11	-108.42	22.56	49.9263	1.32026	9.71256	8.40608	15.4491	12.2685	2.33862	0.0398232	0.109514	0.169249	60.905	1370.4	1.32684	1576.74	0.811715	7914.96			6.52		400			5.13	3.3	1.09		3.96				5.42		0.4	7.42	123					2.85	78
FRETZDORFF, 2002	JCR039B-R045	GL	BSCO2	-30.72	-56.67	49.65	1.32	8.31	8.25	15.33	11.8	3.09	0.11	0.26	0.17	64.1192	1315.09	1.10926	1366.08	0.784961	7913.4	12.3		7.4	36.3	324	0.014	59.4	4.62	2.93	1.07	14.7	3.89	2.17	0.986	2.35		0.385	1.58	7.89	124	0.376	1.4	1.02	35.7	2.86	104	0.105	0.693
Kelley, Kingsley, and Schilling, in revision	VEM0033-7-069-001	GL	AFAR3	56.422	14.465	49.9724	1.31848	10.2182	8.56013	15.2924	11.6665	2.32732	0.0499424	0.12985	0.189781	60.1263	1390.4	1.44847	1626.02	0.816163	7904.29	4.2		7.12	45.39	295.2		82.8	5.39	3.51	1.09	15.5	4.1	1.63	1.19	2.23	4.12	0.499	0.847	7.72	135.3	0.209	1.35	0.37	39.54	3	78.7	0.0613	0.806
Gale et al., this study	AII0127-1-017-B	GL	MARR85	-31.5182	37.8363	49.3268	1.31771	7.73384	8.10835	15.5113	13.6288	2.26289	0.611297	0.232828	0.140687	65.3639	1294.13	0.973798	1292.66	0.806401	7899.67	203.118		27.993			0.19968		3.639	2.08661	1.142		3.47541	2.103		14.121		0.309	24.575	14.261			3.486	16.091		3.366			0.61
Gale et al., this study	ALV1407-001-B1-B	GL	JUAN15	-126.77	42.77	50.584	1.31657	9.27506	8.1993	15.3569	11.8845	2.62189	0.100055	0.140078		61.4083	1348.38	1.17668	1481.7	0.784288	7892.84	16.538	0.59	9.529	41.4	344	0.01722	71.2	5.089	3.24883	1.101	15.81	4.08363	2.229	1.114	3.269		0.469	3.138	8.874	113.1	0.387	1.651	1.395	41.1	3.019	110.861	0.197	0.769
MAHONEY, 1992; JANNEY, 2005	AGU0022-009-002	WR	SWIR19	22.83	-53.158	49.9422	1.31654	9.08093	10.5873	14.8752	10.9342	2.65372	0.0599784	0.10996	0.149946	67.7272	1341.52	1.20213	1490.96	0.877475	7892.66	4.79		8.37	52	551		63	4.21	2.5	1.06		3.69	2.02	0.88	2.61		0.34	1.58	8.19	243	0.33	1.53	0.35	36	2.8	123		0.65
Kelley, Kingsley, and Schilling, in revision	EWI9309-030-001	GL	MARR238	-13.38	-46.592	49.8656	1.3165	9.80456	8.63291	15.2151	11.4776	2.82864	0.159636	0.10975	0.149659	61.3138	1374.09	1.44831	1555.35	0.823294	7892.42	31.6		11.2	44.52	366.7	0.036	74.2	5.1	3.22	1.156	17.33	4.24	1.91	1.12	3.89	6.74	0.443	3.093	9.39	130.7	0.508	1.78	2.5	38.89	3.23	135.9	0.1896	0.802
INGLE, 2010	EWI0004-050-001	GL	GALA9	-93.777	2.502	50.2393	1.31634	10.1384	8.52545	14.3605	12.3601	2.23758	0.130961	0.10297	0.191943	60.2169	1388.18	1.38355	1684.9	0.860148	7891.46	39		10.8	48.8	315			4.48	2.8	0.994		3.86	1.91	0.963	4.37		0.458	6.2	8.45	89		1.69	3.21	48.8	2.75	88.9	0.37	0.702
Sun et al., 2008	TAG-14-3-1	GL	MARR116	-44.81	26.14	50.4974	1.314	8.802	8.32	15.957	11.221	2.64269	0.1	0.100183		62.9826	1327.97	1.07108	1360.47	0.740809	7877.43	10.2369		9.11235					4.3674	2.73611	1.09965	16.7053	3.6654	1.91015		2.79685	5.82025	0.389177	2.23258	8.20142		0.42269		1.02269	33.2239	2.82354	122.119	0.136223
Gale et al., this study	HLY0102-061-sg2	GL	GAKK7	85.05	85.635	49.7756	1.31375	7.79777	8.55385	17.7592	10.9028	3.03737	0.142413	0.15359	0.149598	66.3812	1287.73	1.05238	1149.22	0.684211	7875.93	13.7944	0.733448	12.5825	39.7941	298.564	0.0125474	66.0542	4.60811	2.69967	1.1991	16.2818	4.21835	2.59754	0.965075	4.17349	5.02494	0.39781	3.00301	10.776	150.853	0.553657	2.09404	0.932825	32.3225	3.2184	221.911	0.199405	0.729292
Kelley, Kingsley, and Schilling, in revision	CON2806-055-002	GL	MARR155	-32.688	4.907	49.7365	1.31354	9.99927	8.59614	14.9527	11.7765	2.72082	0.169825	0.0998968	0.179814	60.7446	1384.43	1.50683	1610.78	0.843041	7874.67	35.4		13.06	44.06	273.6	0.048	74.8	4.56	2.89	1.12	15.97	3.78	1.85	1.01	4.71		0.405	5.841	9.93	116.9	0.392	2.02	3.09	35.13	3.09	138.2	0.3873	0.701
Gale et al., this study	CHR0098-007	GL	MARR101	-40.183	32.283	49.6792	1.31337	10.1687	9.17367	15.3425	11.1935	2.46754	0.0534283	0.139294		61.8883	1388.56	1.47373	1614.85	0.833005	7873.65	6.879	0.56	7.936	45.4	308		77.4	5.361	3.5673	1.166	17.21	4.40448	2.214	1.191	2.445	5.78	0.51	1.7	8.799	127.5	0.18	1.466	0.664		3.108	95.006	0.123	0.835
DAVIS, 2008	WFL2002-455-R1	GL	JUAN15	-126.866	42.516	50.3444	1.31292	8.94641	8.42465	15.9602	11.8318	2.38545	0.129711	0.109756	0.159645	62.8946	1334.44	1.10804	1400.85	0.762713	7870.96	18.8		9.99		342	0.02	68	4.8	2.91	1.09	17	4.11	2.11	1.03	3.81		0.45	3.86	8.53	134	0.37	1.65	1.88	39.5	3.1	118.2	0.25	0.74
HAMELIN, 2010	ATAPACA2-034-001	WR	PARR7	-112.25	-44.87	50.4903	1.31275	9.3921	8.07844	15.2481	12.1984	2.62549	0.0605883	0.121177	0.181765	60.7572	1354.99	1.23044	1520.83	0.795504	7869.94	2.5		8.07					5.21	3.28	1.19		4.12	2.13	1.14	2.27		0.45	1.17	8.24		0.42	1.43			3.03	93		0.78
Gale et al., this study	ALV1410-002-A	GL	JUAN11	-130.16	45.22	49.5803	1.3124	9.73018	8.60733	15.199	12.2414	2.51988	0.119686	0.12966		61.424	1373.64	1.39901	1595.92	0.838941	7867.84	11.622	0.55	8.806	43.8	376	0.01026	73.9	4.643	2.97068	1.065	16.59	3.75348	2.023	1.019	3.055		0.428	2.93	8.064	97.3	0.402	1.508	0.873	43.8	2.844	123.398	0.198	0.719
Gale et al., this study	HLY0102-073-012	GL	GAKK10	57.3642	86.96	49.7584	1.31226	7.88649	8.49918	17.2188	11.1748	3.22654	0.175765	0.150954	0.132222	65.9845	1293.08	1.10109	1191.81	0.71364	7867	18.2929	0.616319	12.3109	41.9467	345.38	0.0166391	74.4858	4.33642	2.5823	1.17786	15.6085	3.89403	2.39298	0.915921	4.15229	5.00058	0.364808	3.53861	10.1277	178.41	0.604033	1.99046	1.43903	32.7992	3.10147	201.505	0.233113	0.683856
Gale et al., this study	NHOCHEP-071-004	GL	EPRR30	-104.198	8.513	50.2146	1.31142	9.4779	8.32393	15.2059	12.1276	2.6049	0.101645	0.118586	0.16044	61.253	1359.38	1.2799	1535.39	0.810831	7861.96	16.774	0.67	10.624	43	311	0.023	88.2	4.821	3.0503	1.168	16.39	3.94599	2.292	1.044	3.735	5.94	0.442	3.133	9.209	80.3	0.464	1.72	1.371		3.041	133.352	0.202	0.741
Kelley, Kingsley, and Schilling, in revision	TRI0119-007-001	WR	MARR92	-34.9	35.33	49.5537	1.31037	7.72447	8.50309	15.2445	13.352	2.04144	0.667104	0.258876	0.139395	66.4591	1290.64	0.905423	1281.56	0.815193	7855.67	206.26		33.65	36.92	355.8	0.167	56.75	3.43	2.02	1.185	17.32	3.7	2.07	0.704	16.47		0.281	29.02	16.14	117.8		4.03	14.63	37.98	3.48	277.4	1.7283	0.567
Gale et al., this study	NHOCHEP-017-003	GL	EPRR25	-103.96	12.858	49.2	1.31	9.72	8.1	15.2	11.8	2.55	0.093	0.098	0.179	60	1376.63	1.41754	1575.09	0.806873	7853.45	11				344		82													93				41.2		115
Kelley, Kingsley, and Schilling, in revision	VEM0033-7-067-001	GL	AFAR8	53.58	14.368	49.7601	1.30738	10.0498	8.58277	15.3991	11.8063	2.30537	0.0997997	0.15968	0.179639	60.5871	1384.47	1.43089	1599.81	0.816901	7837.74	10.6		10.04	44.38	356.4		81.2	5.74	3.76	1.16	15.64	4.41	2	1.28	3.53		0.531	2.296	9.28	122	0.364	1.72	1.04	40.41	3.21	88	0.158	0.855
LE ROUX, 2000	EWI9309-028-005	GL	MARR240	-13.453	-46.9	50.1196	1.30348	9.53236	8.48962	15.0368	12.0761	2.7636	0.0796362	0.129409	0.149318	61.5842	1362.49	1.32773	1559.27	0.828412	7814.36	12		11.2					4.93	2.7	1.05		4.3			4.21			1.43	8.8	79			0.85	28	2.98	109	0.08
DAVIS, 2008	WFL2000-RC4	GL	JUAN15	-126.754	42.733	49.9755	1.3021	8.81136	8.39004	16.1918	11.9352	2.5302	0.149603	0.119682	0.16955	63.1531	1331.88	1.1545	1381.97	0.762685	7806.09	34.1		10.82			0.03		4.57	2.88	1.06		3.86	2.15	0.97	4.41		0.44	4.98	8.75		0.37	1.71	2.92	37.4	2.98	129.1	0.3	0.7
DAVIS, 2008	WFL2000-RC17	GL	JUAN15	-126.743	42.753	49.6887	1.30187	8.88042	8.24391	16.4074	11.9035	2.67549	0.159548	0.129632	0.169519	62.5606	1335.95	1.22997	1382.07	0.758002	7804.71	45.2		12.08			0.05		4.65	2.89	1.1		3.93	2.24	1	4.97		0.44	6.14	9.08		0.43	1.88	4.01	35.7	3.07	143.4	0.38	0.73
LE ROUX, 2000	EWI9309-041-006	GL	MARR232	-16.17	-43.427	51.0466	1.30178	10.056	8.54031	14.4816	11.189	2.69174	0.0894741	0.12924	0.139182	60.4539	1377.62	1.31702	1599.95	0.820009	7804.17	14.7		8.84					5.23	3.16	1.04		4.16			3.05			2.21	8.59	107			1.39	43	2.84	95	0.15
LE ROUX, 2000; LE ROUX, 2001	EWI9309-041-002	GL	MARR232	-16.17	-43.427	51.02	1.30009	9.94146	8.39565	14.673	11.3031	2.64929	0.0992868	0.129073	0.139002	60.3193	1373.23	1.2902	1574.87	0.807755	7794.04	16		9.16					5.38	3.42	1.13		4.46			3.35			2.34	8.35	103	0.51		1.5	43	3.25	100	0.18
Gale et al., this study	CYA1978-018-062	GL	EPRR14	-109.07	20.87	50.06	1.3	9.23	8.65	15.06	11.08	2.77	0.06		0.11	62.7823	1349.24	1.2078	1477.73	0.796099	7793.5	20.36	0.6	9.432	44.4	310	0.01661	82.7	4.749	2.95724	1.126	16.9	3.66327	2.139	1.025	3.208		0.425	3.53	8.421	115	0.418	1.559	1.793		2.881	142.566	0.205	0.718
Kelley, Kingsley, and Schilling, in revision	END0063-001-006	GL	MARR194	-11.6	-20.79	49.81	1.3	6.35	8.53	15.81	12.33	2.67	0.05	0.31	0.07	70.7427	1231.75	0.603086	1100.92	0.736055	7793.5			9.3	46.17	390	0.017	77.39	5.38	3.42	1.179	16.8	3.79	2.03	1.178	2.12	4.64	0.475		8.84	144.2	0.313	1.63	0.36	41.56	3.25	112.9		0.781
Gale et al., this study	MOA8801-017-026	GL	SEIR68	127.417	-50.222	50.5577	1.29997	8.50522	8.67654	15.7306	11.8207	2.85187	0.0302318	0.120927	0.161236	64.7423	1315.59	1.04929	1367.57	0.778385	7793.32	2.166	0.48	7.602	40.8	381	0.00184	75	4.999	3.05547	1.15	16.2	4.03806	2.286	1.046	2.044		0.427	0.781	8.449	93.5	0.226	1.469	0.197	35.9	3.02	101.913		0.751
BACH, 1996	SON0040-031-002G	GL	CHIL7	-93.9173	-38.0982	50.2657	1.29911	9.49652	9.01385	15.1896	11.792	2.32841	0.0499659	0.119918	0.169884	63.0794	1358.08	1.21642	1537.57	0.822001	7788.16	7.4		7.8	44	354		58	4.9	3.1	1.1		4	2.15	1.1	2.12		0.44	1	8.2	148	0.36	1.36	0.61		2.93	85	0.06	0.75
Kelley, Kingsley, and Schilling, in revision	END0063-024-005	GL	MARR208	-13.46	-30.98	50.3242	1.29779	8.58536	8.22598	15.5934	12.3789	2.72535	0.0598979	0.349404	0.169711	63.2981	1322.63	1.07471	1405.11	0.781948	7780.25			8.97	42.21	410.2		62.14	4.49	2.82	1.039	15.09	3.34	1.59	0.967	2.44	4.84	0.389	1.942	7.71	160.2	0.32	1.47		36.7	2.73	121.5	0.143	0.661
LE ROUX, 2000	EWI9309-040-007	GL	MARR232	-15.908	-44.41	50.4888	1.29706	9.28986	8.75096	15.05	11.5034	2.8007	0.119788	0.12977	0.189664	62.9023	1349	1.22847	1486.71	0.812787	7775.87	19.7		8.95					4.87	2.77	0.98		3.99			3.43			2.44	8.54	128	0.55		1.63	41	2.95	105	0.17
SIMS, 2002	ALV2351-002	WR	EPRR29	-104.291	9.8357	49.8877	1.29682	9.387	8.24978	15.4621	12.2699	2.6535	0.0997555		0.189536	61.2693	1357.62	1.31015	1520.71	0.80703	7774.44			9.3					4.8	2.8	1.2		4.3	2.2	1	2.9		0.46	2.3	8.5	103		1.6			3	123		0.78
Gale et al., this study	ALV0918-R001	GL	EPRR14	-109.07	20.87	49.7612	1.29498	9.1853	8.50267	15.7806	12.1266	2.63011	0.0883395	0.123474	0.174671	62.4938	1349	1.27225	1477.29	0.79934	7763.41	15.093	0.55	8.93	41.9	342	0.01527	78.5	5.003	3.11131	1.122	16.78	3.89298	2.22	1.074	2.918	5.74	0.449	2.704	8.505	103.2		1.524	1.267		2.877	115.795	0.169	0.747
Gale et al., this study	GIL7904-014-794	GL	EPRR11	-108.38	22.46	50.4059	1.29478	10.0302	8.54032	14.1682	12.6767	2.32288	0.0300924		0.170524	60.5153	1382.85	1.33027	1709.61	0.872948	7762.21	2.421	0.44	6.912	47.6	357		91	4.777	3.06684	1.114	16.14	3.66699	2.174	1.04	1.949	5.6	0.454	0.996	7.249	48.9	0.321	1.3	0.205		2.698	97.353	0.078	0.722
Gale et al., this study	WASPLUM-5-044-001	GL	MARR212	-14.327	-33.27	50.7701	1.29406	9.12508	8.11008	14.8569	12.4106	2.67415	0.115432	0.120407	0.149265	61.5352	1343.16	1.14125	1500.91	0.808264	7757.89	19.903	0.49	9.579	42.7	384	0.02011	93.1	4.729	2.9531	1.096	14.01	3.82695	2.004	1.031	3.394	5.71	0.419	3.718	8.509	91.8	0.495	1.574	1.731	40.9	2.9	114.337	0.217	0.72
INGLE, 2010	EWI0004-062-001	GL	GALA9	-94.66	2.582	49.3372	1.29401	10.4224	8.70614	15.2238	11.9016	2.42003	0.0835394	0.106689	0.180163	60.0574	1403.46	1.61737	1679.2	0.848391	7757.59	21.4		8.97	52.2	297			4.33	2.73	0.954		3.6	1.85	0.949	3.19		0.446	4.3	7.61	116		1.52	1.96	45.6	2.57	93	0.24	0.668
Sun et al., 2008	TAG-9-2	GL	MARR116	-44.8	26.14	50.5819	1.294	8.643	8.149	15.777	11.361	2.76028	0.11	0.136665		62.9234	1321.9	1.04208	1348.5	0.74181	7757.53	12.6003		10.2028					4.37919	2.70325	1.12793	16.4915	3.70026	2.01366		3.15657	5.82499	0.382366	2.83621	8.56464		0.461956		1.24317	33.8218	2.88831	140.695	0.171527
LE ROUX, 2000	EWI9309-012-008	GL	MARR247	-8.003	-49.757	50.5787	1.29364	9.74818	8.54682	14.6449	12.0124	2.55922	0.0501689	0.120405	0.170574	61.2128	1369.01	1.28297	1601.91	0.834688	7755.37	6.64		7.36					4.11	2.79	1.13		3.99			2.43			1.15	7.91	98			0.39	45	2.87	88
Kelley, Kingsley, and Schilling, in revision	TRI0139-033-002	GL	MARR13	5.18	73.01	51.0756	1.29352	8.89668	8.2937	15.5128	11.347	2.67903	0.227879	0.0594468	0.0693546	62.6587	1329.43	1.0689	1369.43	0.756276	7754.65	72.7		13.86	44.4	344	0.104	84.6	4.53	2.79	1.07	19.82	3.81	1.5	0.98	5.65	4.47	0.4	6.697	9.87	154	0.512	2.01	6.2	41.1	2.99	121.1	0.429	0.686
Kelley, Kingsley, and Schilling, in revision	TRI0138-007-001	GL	MARR59	-29.42	50.46	51.0675	1.29307	8.74019	8.18816	15.892	11.1961	2.93658	0.0792344	0.128756	0.158469	62.7742	1323.03	1.06989	1342.63	0.736678	7751.95	9.46		8.76	41.32	345.1		62.4	4.92	3.08	1.093	15.29	3.86	1.93	1.077	2.33	5.73	0.44	2.395	8.81	167	0.35	1.6	0.763	36.91	3	112.7	0.165	0.737
DAVIS, 2008	SCL771-R3	GL	JUAN15	-126.742	42.757	49.8964	1.29186	8.67011	8.23511	16.4104	11.9254	2.69682	0.149604	0.13963	0.159577	63.0954	1326.59	1.16178	1352.46	0.751274	7744.7	40.1		11.31			0.04		4.54	2.79	1.08		3.93	2.13	0.97	4.65		0.42	5.6	8.85		0.45	1.78	3.61	37.7	3.01	140.8	0.33	0.7
DAVIS, 2008	WFL2000-RC11	GL	JUAN15	-126.742	42.758	50.0054	1.29185	8.65998	8.2454	16.3806	11.8662	2.6968	0.149603	0.129656	0.149603	63.1517	1325.15	1.14426	1347.6	0.749351	7744.64	39		11.84			0.04		4.69	2.9	1.12		4	2.25	0.98	4.85		0.45	5.82	9.29		0.38	1.85	3.53	39.2	3.13	143.4	0.34	0.72
MÜHE, 1991; MÜHE, 1993	POLARK4-370-005-1	WR	GAKK12	22.7168	85.9002	50.0653	1.28863	8.25831	9.3023	15.9971	11.1044	3.14104	0.140944	0.151011	0.140944	66.97	1306.36	1.10672	1297.73	0.784801	7725.34			13.5	39	356		60	4.44	2.62	1.18		3.63	2.24	0.88	5.43		0.34	9.1	10.6	166	0.64	2.12		30	3.2	172		0.66
Gale et al., this study	HLY0102-063-027	GL	GAKK7	84.5825	85.6342	50.1293	1.28646	7.87659	8.09227	16.7139	11.4429	3.30266	0.259357	0.165163	0.139455	64.9035	1292.4	1.07495	1200.68	0.718678	7712.33	28.9955		14.3361	35.9138	278.222		68.025	4.54363	2.64677	1.22365			2.64249	1.00064	5.30651			5.32922	11.0597	154.458	0.676548	2.30087	2.24626		3.10736	224.618	0.315158	0.694376
HEKINIAN, 1995	NAUGARR-012-004	WR	EPRR58	-111.95	-13.42	49.6591	1.28619	9.29474	8.08894	16.3085	12.1987	2.53219	0.0602902	0.130629	0.150726	61.0362	1354.66	1.30445	1467.88	0.768	7710.71	2.95		7.81	40	322			5.16	2.86	1.15		4.93			2.38		0.43		8.07	129					3.72	86
BACH, 1994	SONGMP5-371	WR	EPRR55	-110.723	-11.874	50.1005	1.28514	9.2179	8.10243	15.6627	12.249	2.70081	0.0803215	0.110442	0.170683	61.273	1349.69	1.25483	1482.35	0.788101	7704.41			10	43	315			4.6	2.9	0.92	16	3.7		0.89	2.4		0.41		7.7	92					2.4	133
MAHONEY, 1989; WHITE, 1993	AII0093-5-006-013	GL	SWIR62	65.83	-27.6	50.2891	1.2844	7.88749	8.85529	17.0366	9.90498	3.78894	0.178488	0.158656		66.8969	1288.03	1.10666	1152.15	0.705471	7699.98	24				302		68												10.87	190	0.792		2.03	28	3.26	180.9
Gale et al., this study	HYL0102-063-001	GL	GAKK7	84.5825	85.6342	49.5888	1.28203	8.10827	8.4304	17.1689	10.9211	3.30322	0.261213	0.193539	0.147323	65.1751	1302.43	1.18045	1202.73	0.71506	7685.77	23.4126	0.74089	12.9955	39.4265	298.739	0.0224659	69.139	4.31756	2.51455	1.11465	15.6338	3.99642	2.42981	0.905101	4.70173	4.94319	0.376756	4.61917	10.3045	136.204		2.04512	1.59161	31.7913	3.0295	224.404	0.288526	0.673254
DAVIS, 2008	SCL771-R1	GL	JUAN15	-126.742	42.757	49.7802	1.28142	8.73952	8.21327	16.4081	11.9928	2.68602	0.159555	0.13961	0.159555	62.8476	1329.82	1.18801	1364.33	0.755311	7682.11	40.7		11.35			0.04		4.51	2.79	1.08		3.87	2.11	0.97	4.66		0.42	5.64	8.87		0.45	1.78	3.68	38.2	3.02	140.7	0.33	0.69
SMITH, 2001	AII0125-24-R099	GL	EPRR29	-104.25	9.613	50.1352	1.2809	9.34657	8.57602	15.3108	12.1085	2.60183	0.10007		0.190134	62.287	1354.16	1.26236	1514.47	0.815595	7679	6.3		8.8			0.01		5.4	3.2	1.1			2.5	1.1	3			1.6	8.2			1.5	0.46		2.9	114	0.13	0.76
LE ROUX, 2000	EWI9309-040-002	GL	MARR232	-15.908	-44.41	51.1902	1.28063	9.40081	8.50199	14.9181	11.1595	2.80631	0.109262	0.129127	0.13906	61.9468	1349.4	1.16634	1476.16	0.789759	7677.38	19.5		8.84					4.83	2.91	1.09		4.23			3.27			2.44	8.95	121	0.71		1.49	42	3.19	103	0.17
Kelley, Kingsley, and Schilling, in revision	EWI9309-040-001	GL	MARR232	-15.91	-44.41	51.0099	1.28053	9.65092	8.59935	14.5143	11.4359	2.79873	0.100103	0.110113	0.150155	61.5956	1361.51	1.24295	1552.39	0.823069	7676.78	25		10.48	40.04	336.2	0.029	59.9	5.33	3.33	1.167	15.68	4.34	1.91	1.19	3.44	6.22	0.461	2.469	9.26	128.5	0.472	1.72	2	35.26	3.27	122.1	0.15885	0.812
BOURDON, 1996	AII0127-2-R078	GL	MARR81	-29.662	40.079	50.82	1.28	8.92	8.64	15.39	11.77	2.18				63.5502	1331.84	0.967514	1435.91	0.77314	7673.6	114																									159
BOURDON, 1996; YI, 2000	AII0127-1-017-003	GL	MARR85	-31.518	37.836	49.04	1.28	7.66	8.46	16.1	14.04	2.42				66.5327	1291.22	0.923292	1365.25	0.811042	7673.6	244		32.6			0.24		3.79	2.04	1.19		4.12	2.31	0.76	16.7		0.31	28	16.2		0.84	3.96	18.8		3.55	295		0.64
Gale et al., this study1	WASVNTR-R162	GL	EPRR18	-105.321	16.49	49.4689	1.27978	9.46287	8.24636	16.4328	11.4971	2.76208	0.109689	0.199424		61.0683	1361.2	1.39366	1455.81	0.76278	7672.28	14.419		10.383			0.01197		4.973	3.1506	1.196		4.12269	2.391	1.068	3.31		0.453	2.174	9.368			1.737	0.871		3.198	135.515		0.755
Kelley, Kingsley, and Schilling, in revision	END0063-012-005	GL	MARR201	-13.9	-26	50.9404	1.2793	8.11904	8.21978	15.3819	12.5412	2.75	0.0705128	0.271978	0.120879	64.5683	1300.37	0.910484	1342.91	0.775787	7669.4			7.55	39.73	239		69.4	4.63	2.81	1.008	15.25	3.43	1.44	1.012	2.01	4	0.394	0.971	7.61	73.1	0.247	1.48		36.73	2.69	105.9		0.665
Gale et al., this study1	AII0129-7-R016	GL	MARR121	-44.97	23.335	49.9229	1.27896	9.08548	8.47373	15.8945	11.8374	2.75231	0.0858328	0.17752	0.161644	62.6699	1343.95	1.2494	1442.11	0.784622	7667.37			8.282			0.0048		5.095	3.23435	1.206		4.10409	2.135	1.109	2.564		0.451	1.659	8.306			1.519	0.352		3.023	111.244	0.122	0.786
LAWSON, 1996	DAR0057-024-001-1B	WR	MARR120	-46.185	24.557	50.2406	1.27837	8.80411	8.22606	16.5582	11.6115	2.63254	0.0707401	0.111163	0.161692	62.7119	1328.74	1.13131	1350.5	0.733177	7663.83	8.98		8.47	45	372.5	0.014	67.19	4.63	2.89	0.99	15	3.87	2.12	0.97	2.71		0.45	1.97	8.03	157.3	0.429	1.39	0.81	35.57	2.75	115.9	0.135	0.71
CHRISTIE, 2004	MELWEST-10-131-017	GL	SEIR51	111.34	-50.063	50.9356	1.27772	9.02412	8.07671	15.2891	12.2827	2.57818	0.0662593	0.0613146	0.107795	61.7009	1337.65	1.08613	1460.37	0.781526	7659.93	9.4		7.82	42.7	370.2		70.4	4.54	2.96	0.938			2.02	1.02	2.48		0.457	1.57	7.6	96.9	0.513	1.4	0.91	37	2.67	80.7	0.126	0.664
Kelley, Kingsley, and Schilling, in revision	END0026-032-003	GL	MARR12	8.11	73.52	49.9631	1.27654	9.13367	8.18369	15.5263	11.7263	2.67182	0.15833	0.791651	0.128643	61.7267	1346.99	1.22712	1448.22	0.779462	7652.86	41.1		8.49	39.3	332	0.044	65.7	4.34	2.76	1	17.69	3.79	1.315	0.957	2.92	6.53	0.398	2.984	7.49	118.3	0.531	1.43	3.5	34.5	2.7	107	0.2066	0.671
Gale et al., 2011	AII0127-1-R028	GL	MARR88	-33.331	36.66	50.8683	1.2762	9.26266	8.05132	14.9462	12.2641	2.28997	0.210538	0.146678	0.167632	61.0076	1347.85	1.10935	1487.18	0.791403	7650.82	56.447		13.4			0.04422		4.259	2.86315	0.988		3.57399	1.897	0.947	5.832		0.384	9.715	9.028		0.541	1.88	4.508		2.633	107.977	0.531	0.68
Kelley, Kingsley, and Schilling, in revision	CON2806-048-009	GL	MARR157	-31.49	3.458	50.1186	1.27477	10.1926	8.88041	14.6835	11.5471	2.43664	0.158615	0.109048	0.158615	61.0633	1389.2	1.4445	1636.93	0.848634	7642.25	31.6		11.05	41.88	349.9	0.04	64.5	4.72	2.97	1.1	15.8	3.92	1.75	1.04	3.8	4.59	0.425	4.867	9.03	150.1	0.397	1.82	2.16	36.84	2.91	116.5	0.3055	0.72
LE ROUX, 2000	EWI9309-034-002	GL	MARR236	-14.193	-45.847	49.2955	1.27444	10.3571	9.06455	15.6259	10.8496	2.82185	0.108734	0.098849	0.138389	61.1705	1398.18	1.6629	1600.82	0.828838	7640.27	10.7		7.48					4.69	3.22	0.74		4.34			2.63			1.55	7.94	152	0.34		0.92	41	2.66	99
Kelley, Kingsley, and Schilling, in revision	EWI9309-018-001	GL	MARR249	-6.2	-51.053	50.5418	1.27377	9.46316	8.56425	14.2365	12.5458	2.4616	0.189191	0.089617	0.149362	61.963	1358.95	1.21221	1589.65	0.858723	7636.25	52.8		14.68	45.38	305.7	0.038	92.6	4.27	2.63	1.121	16.62	3.82	1.81	0.93	5.83	5.27	0.365	5.87	10.13	76	0.589	2.11	3.49	42.45	3.06	168.7	0.3775	0.688
KLEIN, 1991	VEM0033-1-005-015	WR	SEIR67	127.08	-48.738	50.5107	1.27205	8.00508	8.79391	15.9229	11.8225	2.97826	0.0915613	0.118728	0.147907	66.4134	1295.2	0.978698	1285.41	0.770779	7625.94	5.97				359		73.7													148				33.4		141
PYLE, 1994	MOA8801-017-013	GL	SEIR68	127.417	-50.222	49.7	1.27	8.478	8.58	15.42	11.66	2.82	0.03	0.11	0.16	64.5598	1321.19	1.08689	1389.6	0.786614	7613.65	2.7		9.1	39.9	365		74.4			1.12					2.14		0.47		6.6	102				35.4	3.05	103	0.08	0.68
Gale et al., this study	KLM0417-041-001	GL	BLAU8	-176.206	-20.534	48.8835	1.26995	8.27147	9.35632	16.4154	11.9381	2.45847	0.339863	0.204656	0.151272	67.0628	1313.77	1.15836	1307.42	0.798617	7613.35	105.11	0.7092	20.7491	43.9954	447.097	0.0992	75.3625	4.3103	2.5795	1.1628	15.7965	4.0327	2.3279	0.9076	9.3588	4.889	0.3897	14.8067	12.6434	189.224	0.9181	2.8064	9.2178	34.2241	3.147	193.243	0.8309	0.6835
LE ROUX, 2000	EWI9309-028-006	GL	MARR240	-13.453	-46.9	50.4693	1.26816	9.25266	8.51148	15.0266	12.0523	2.73488	0.069946	0.109915	0.199846	62.3467	1349.17	1.2139	1510.92	0.81683	7602.62	12.5		8.45					4.82	2.78	1.04		3.92			2.82			1.25	8.45	79			0.81	28	2.78	111	0.07
SIMS, 2003	ALV2746-009	GL	EPRR29	-104.295	9.81618	50.0693	1.26669	9.13616	8.45793	15.5394	12.1583	2.59323	0.119688	0.109714	0.169557	62.4959	1345.35	1.21597	1471.26	0.800593	7593.81	10		8.7					4.6	2.7	1.1		4.2	2.4	1	2.8		0.42	2.5	7.97	98		1.5	0.8		2.78	120		0.74
LE ROUX, 2000; LE ROUX, 2001	EWI9309-028-008	GL	MARR240	-13.453	-46.9	50.2456	1.26654	9.66765	8.59358	14.8634	11.9872	2.71181	0.0698568	0.119754	0.169652	61.5388	1367.24	1.33352	1581.45	0.835823	7592.91	11.5		8.58					4.57	2.76	1.02		4.29			2.87			1.44	8.72	97			0.84	44	2.74	109	0.11
KARSTEN, 1996;STURM, 1999	KNO0138-11-014-009	GL	CHIL27	-75.9343	-45.9532	50.7849	1.26603	8.85043	8.57204	14.7489	12.4174	2.69378	0.0700985	0.124174	0.167235	63.5486	1330.69	1.06618	1478.72	0.824865	7589.85	14.4		7.91		377	0.015	78	4.59	2.71	1.04		3.85	1.99	1	2.52		0.416	1.76	8.02	95	0.332	1.46	1.02	38.5	2.81	123	0.119	0.74
MEYZEN, 2003	DUFEDUL-029-001-002	GL	SWIR55	61.32	-28.95	49.6824	1.26464	7.63303	8.25029	17.9057	10.1171	3.95452	0.260958	0.210774	0.130479	66.0506	1282.5	1.18147	1089.34	0.667756	7581.52	24.5		16.8	38	301		59	4.52	2.47	1.26	16.8	4.24	2.72	0.86	5.95		0.37	4.08	11.5	164		2.49	1.81		3.31	260	0.3	0.72
KLEIN, 1991	VEM0033-1-005-009	WR	SEIR67	127.08	-48.738	50.5356	1.26275	8.0213	8.81185	15.8296	11.8834	2.91043	0.115813	0.10977	0.147032	66.4137	1295.57	0.968148	1289.78	0.774908	7570.19	5.37				378		69													149				33.8		135
LAWSON, 1996	DAR0057-009-001-2B	WR	MARR120	-46.325	23.888	50.2648	1.2624	8.50538	8.1679	16.6024	11.7539	2.7461	0.0905309	0.110649	0.160944	63.3509	1317.57	1.08983	1312.7	0.72987	7568.09	8.67		8.93	40.79	344.5	0.011	71.67	4.43	2.79	1.05	14.78	3.71	2.19	1.01	2.84		0.43	1.85	8.15	131.04	0.484	1.48	0.85	35.69	2.78	125	0.12	0.69
LE ROUX, 2000	EWI9309-034-007	GL	MARR236	-14.193	-45.847	48.5007	1.26188	10.4359	9.49142	15.7854	11.1202	2.71361	0.0801788	0.120268	0.17038	62.0795	1407.32	1.79292	1639.17	0.859432	7564.97	11.6		7.82					5.06	3.34	0.8		4.49			2.84			1.76	7.68	147	0.3		0.91	43	2.87	102	0.11
MÜHE, 1991; MÜHE, 1993	POLARK4-370-005-3	WR	GAKK12	22.7168	85.9002	50.2871	1.26018	8.03713	9.06128	16.3823	11.0916	2.79039	0.240034	0.150021	0.14002	66.9898	1295.79	0.996796	1227.09	0.746641	7554.78			13.5	39	369		60	4.58	2.45	1.12		3.82	2.33	0.88	5.38		0.34	9.35	10.24	160	0.78	2.03		31	3.26	163		0.66
BOURDON, 1996	AII0127-1-017-001	GL	MARR85	-31.518	37.836	49.59	1.26	7.6	8.7	16.26	13.68	2.22				67.3259	1283.64	0.829975	1319.5	0.791736	7553.7	248																									288
Gale et al., this study	CYA1978-006-010	GL	EPRR14	-109.07	20.92	49.24	1.26	9.11	8.5	15.07	12.23	2.38	0.04	0.12	0.17	62.6792	1351.35	1.20926	1528.28	0.820892	7553.7	8.065	0.53	8.087	41.5	344	0.0071	80.6	4.836	3.08029	1.098	16.36	3.84555	2.085	1.039	2.387		0.439	1.579	8.547	113	0.343	1.505	0.724		2.987	132.107	0.106	0.725
Gale et al., this study	NHOCHEP-021-004	GL	EPRR25	-103.935	12.781	49.355	1.25906	8.92419	8.89398	16.0656	12.1474	2.4879	0.129935	0.181304	0.162167	64.2078	1339.3	1.23458	1433.18	0.803307	7548.06	14.7				345		80													143				34.9		132
Gale et al., this study	NHOCHEP-019-003	GL	EPRR25	-103.9	12.82	49.6461	1.25878	9.20416	8.79129	15.6491	12.2353	2.54776	0.0704914	0.120842	0.171193	63.2253	1350.01	1.2691	1498.76	0.818637	7546.39	5.17	0.55	8.776	40.7	353	0.005	77.2	4.711	2.97275	1.089	16.21	3.79812	2.184	1.025	2.663	5.32	0.426	1.679	8.347	108.7	0.422	1.522	0.45	39	2.833	129.099	0.122	0.711
Kelley, Kingsley, and Schilling, in revision	TRI0138-003-001	GL	MARR67	-27.64	47.78	51.0619	1.25779	8.63424	8.36805	15.01	11.6481	3.02205	0.169105		0.179053	63.5636	1320.22	1.0578	1380.3	0.786341	7540.45	51.06		13.69	42.01	359	0.045	75.17	4.68	2.93	1.124	17.94	4.06	1.63	1.015	5.48		0.404	6.51	9.84	138.6	0.614	2.03	4	39.6	3.09	143	0.4033	0.733
Kelley, Kingsley, and Schilling, in revision	VEM0033-7-062-001	GL	AFAR12	49.805	13.362	49.9273	1.25741	10.2888	8.77196	15.3285	11.3966	2.2853	0.0898153	0.149692	0.169651	60.5466	1393.18	1.46627	1616.41	0.817626	7538.17	13.3		9.65	45.8	339.1		80.3	5.29	3.33	1.09	15.47	4.1	1.78	1.15	3.43		0.473	2.777	8.72	147	0.281	1.63	1.4	43.87	3.05	94.6	0.1852	0.772
LE ROUX, 2000	EWI9309-034-008	GL	MARR236	-14.193	-45.847	48.8316	1.25541	10.4848	9.20679	15.8311	11.0223	2.73133	0.0703595	0.120616	0.140719	61.2492	1406.55	1.75284	1629.45	0.839595	7526.18	10.9		7.55					4.67	3.31			4.37			2.69			1.71	7.19	150	0.34		0.81	41	2.89	99	0.12
Kelley, Kingsley, and Schilling, in revision	EWI9309-028-001	GL	MARR240	-13.45	-46.9	51.1476	1.25415	9.32499	8.54281	14.3757	11.8913	2.82709	0.0702889	0.120495	0.140578	62.2501	1348.67	1.15328	1535.39	0.829885	7518.63	15.5		9.52	42.03	346.2	0.02	75.7	4.73	3.05	1.105	15.41	4.01	1.55	1.05	2.81	6.56	0.425	1.317	8.54	118.1	0.411	1.57	1.01	39.6	2.96	124.1	0.0892	0.731
Gale et al., 2011	AII0127-1-R032	GL	MARR88	-33.239	36.875	50.6965	1.25266	9.11743	8.6361	14.9751	11.9118	2.1077	0.298965	0.166424	0.187351	63.0311	1341.24	1.06681	1446.33	0.799858	7509.7	84.012		17.075			0.07258		4.266	2.79283	1.03		3.65118	2.076	0.95	7.84		0.401	14.145	10.723		0.491	2.351	6.437		2.913	127.201	0.775	0.664
DAVIS, 2008	WFL2000-187-R3	GL	JUAN15	-126.818	42.601	50.7136	1.25142	8.90635	8.32159	15.7024	12.0098	2.38554	0.0997816	0.10976	0.149672	62.7119	1331.56	1.05201	1408.64	0.765946	7502.26	14.5		8.17			0.02		4.48	2.82	0.99		3.7	1.97	0.97	2.95		0.43		7.28		0.29	1.4	1.37	40.3	2.66	111.7		0.67
SIMS, 2003	ALV2737-008	GL	EPRR29	-104.301	9.84685	49.7637	1.25123	9.15163	8.55581	15.8298	12.1669	2.59391	0.0905317	0.100591	0.160945	62.7257	1347.27	1.25647	1470.08	0.799563	7501.12	7		8.2					4.3	2.5	1.1		3.8	2.3	0.93	2.6		0.4	2.2	8.24	110		1.4	0.7		2.66	123		0.7
DAVIS, 2008	WFL2000-187-R17	GL	JUAN15	-126.795	42.617	49.6321	1.25119	9.40949	8.53708	16.2063	11.6919	2.458	0.129692	0.119716	0.169597	62.0221	1357.87	1.32139	1459.79	0.777006	7500.88	22		9.6			0.02		4.36	2.71	1.02		3.6	1.96	0.92	3.7		0.41	3.93	7.92		0.32	1.54	2.16	36.6	2.81	123.8	0.24	0.68
LE ROUX, 2000	EWI9309-034-006	GL	MARR236	-14.193	-45.847	48.7852	1.2497	10.5382	9.34841	15.6521	10.9733	2.7361	0.0794047	0.0992558	0.218363	61.4907	1409.67	1.78316	1644.29	0.852289	7491.95	11.9		7.7					4.74	3.06			3.94			2.65			1.79	7.86	142			1.03	43	2.87	99	0.11
Gale et al., this study; RYAN, 1987; RYAN, 1993	NHOCHEP-019-005	GL	EPRR25	-103.9	12.82	49.335	1.24848	9.12195	8.8501	16.0087	12.2834	2.49696	0.0724923	0.110752	0.164114	63.5881	1347.86	1.28253	1476.81	0.811733	7484.64	5.9				361											5.08				118				37.9		125
BACH, 1996	SON0040-056-G	GL	CHIL3	-97.061	-36.839	49.5166	1.2479	8.68337	9.10466	16.4723	11.7802	2.61559	0.0399327	0.119798	0.159731	65.3659	1327.64	1.17916	1376.82	0.782704	7481.16	5.1		8.53	46	373		63	4.3	2.7	0.94		3.5	2.2	0.95	2.43		0.37	0.73	7.8	153	0.424	1.4	0.29		2.7	130.4	0.05	0.64
LE ROUX, 2000	EWI9309-028-002	GL	MARR240	-13.453	-46.9	51.0469	1.24752	9.36962	8.36329	14.5784	11.9379	2.83175	0.0699175	0.119859	0.129847	61.6369	1351.63	1.1833	1533.12	0.819543	7478.88	11.4		8.36					4.67	2.79	1.06		4.45			2.9			1.34	8.37	77			0.79	28	3.12	107	0.09
LE ROUX, 2000	EWI9309-034-005	GL	MARR236	-14.193	-45.847	49.2942	1.24731	10.6772	8.9097	15.7578	10.7423	2.80189	0.0599193	0.0798924	0.139812	60.0324	1411.42	1.74962	1634.06	0.820893	7477.62	11		7.43					4.8	2.99			3.83			2.56			1.57	7.51	144	0.32		0.9	40	2.54	96
LE ROUX, 2000	EWI9309-012-002	GL	MARR247	-8.003	-49.757	51.3151	1.24691	9.64914	8.63052	14.1497	11.9648	2.50653	0.0396136	0.0891306	0.148551	61.6856	1361.45	1.15397	1598.12	0.839443	7475.23	6.94		7.37					4.52	2.8	1.02		4.05			2.51			1.22	8.03	107	0.26		0.44	44	2.97	91
INGLE, 2010	EWI0004-045-002	GL	GALA9	-93.352	2.443	50.0111	1.24668	10.0036	8.83203	14.8057	12.1718	2.25286	0.0892225	0.074185	0.179447	61.3779	1382.7	1.37586	1643.73	0.852489	7473.85	25.6		8.95	49.8	382			4.51	2.84	0.963		3.56	1.93	1.04	3.43		0.457	4.2	7.46	158	0.3327	1.45	2.57	42.7	2.63	76.3	0.28	0.701
Gale et al., this study	ALV1406-002-B7	GL	JUAN16	-127.12	42.28	49.8197	1.24512	9.25894	8.53481	15.1444	12.6719	2.63351	0.0800801	0.12012		62.395	1353.87	1.26646	1551.42	0.839035	7464.49	11.766	0.42	7.019	41.9	395	0.01369	76.6	4.505	2.85901	1.03	16.19	3.60747	1.863	0.981	2.317		0.415	2.037	7.202	94.8	0.273	1.286	1.151	41.8	2.679	101.278	0.131	0.691
Gale et al., 2011	AII0127-1-R031	GL	MARR88	-33.254	36.856	50.9782	1.24444	9.34379	8.00554	14.9652	12.1929	2.24538	0.208571	0.146698	0.15568	60.664	1350.84	1.1101	1490.15	0.786022	7460.42	48.62		12.397			0.04571		4.043	2.50848	0.934		3.25593	1.724	0.852	5.206		0.348	8.8	8.383		0.451	1.724	3.935		2.595	112.373	0.504	0.598
FRETZDORFF, 2002; FRETZDORFF, 2003	POLAN15-2-096-001	GL	BSCO2	-30.73	-56.54	50.8032	1.24329	7.90452	8.24819	16.5166	11.3312	3.0021	0.131405	0.26281	0.161729	65.2568	1289.07	0.942447	1206.31	0.710747	7453.52	20.2		9.26	36.3	302	0.016	52.7	4.53	2.59	1.05	14.5	3.71	2.27	0.925	3.12		0.371	2.45	8.17	130	0.448	1.59	2.34	30.5	2.82	129	0.152	0.665
Jenner and O'Neill, 2012	MELVULC-5-027-019	GL	AARR3	-6.04	-56.89	49.7187	1.24268	8.83413	8.52011	16.2737	11.5536	3.03093	0.12881	0.138719		63.4505	1333.64	1.25515	1379.01	0.771081	7449.87	22.8804	0.428514	9.57586	44.5415	323.134	0.0191565	84.5997	4.07349	2.54247	1.06237	17.3857	3.49656	1.85654	0.85143	3.44051	4.45833	0.335079	3.52624	8.24824	99.9928	0.472523	1.51208	1.78903	36.8	2.69783	150.975	0.209126	0.616165
LE ROUX, 2000; LE ROUX, 2001	EWI9309-028-007	GL	MARR240	-13.453	-46.9	50.398	1.24112	9.46933	8.62889	14.9338	12.0152	2.68074	0.0695586	0.119243	0.139117	62.1247	1358.24	1.25979	1547.8	0.828377	7440.51	11.4		8.36					4.7	2.88	1.07		4.32			2.85			1.42	8.15	97			0.74	44	3.13	107	0.09
DAVIS, 2008	WFL2000-187-R16	GL	JUAN15	-126.797	42.616	49.5705	1.24063	9.49807	8.59703	16.2222	11.6102	2.45741	0.129661	0.119687	0.159582	61.9662	1361.5	1.34879	1468.77	0.779413	7437.58	22.1		9.6			0.02		4.3	2.72	1		3.65	1.96	0.91	3.71		0.41	3.93	7.95		0.3	1.55	2.2	37.6	2.79	124.8	0.25	0.67
Kelley, Kingsley, and Schilling, in revision	END0063-016-006	GL	MARR203	-13.2	-28.01	49.996	1.23882	8.18831	8.46024	16.0644	12.4285	2.61865	0.0604303	0.503586	0.151076	65.0322	1306.04	0.998876	1334.62	0.770345	7426.73			9.99	42.17	329.4		72.03	5.02	3.18	1.121	15.76	3.57	1.9	1.106	2.67	4.56	0.444	1.554	8.81	97.2	0.353	1.66		35.94	3.05	117.9	0.12555	0.731
LE ROUX, 2000	EWI9309-034-003	GL	MARR236	-14.193	-45.847	49.3836	1.23881	10.4291	9.13637	15.6885	10.7283	2.78278	0.069429	0.0892659	0.148777	61.1934	1400.02	1.65678	1604.32	0.825031	7426.67	11.5		7.6					4.62	2.91	0.76		3.75			2.66			1.56	7.75	158	0.29		1.02	41	2.7	98	0.11
Jenner and O'Neill, 2012	ENV7025-001-001	GL	JUAN3	-130.25	50.23	48.0896	1.23878	9.28234	8.85247	17.2892	11.8391	2.68249	0.109549	0.0796723		63.1898	1360.48	1.52709	1435.21	0.782619	7426.49	16.1687	0.460439	9.20735	48.0561	265.313		85.0631	3.98217	2.39804	1.07833	16.8409	3.28739	1.82777	0.836668	3.19373	4.2609	0.331869	2.74703	7.70689	168.476	0.411722	1.45355	1.02163	34	2.58295	165.733	0.1702	0.572845
MARTIN, 1991	ALV1645-D	WR	EPRR14	-109.1	20.83	50.6457	1.23721	8.74028	8.1117	15.9939	11.7435	2.86354	0.0598649	0.0947861	0.219505	62.5545	1326.23	1.11109	1367.39	0.749355	7417.07	8.1			58			81																			139
SIMS, 2003	ALV2768-008	GL	EPRR29	-104.282	9.83342	49.6087	1.23603	9.04482	8.71954	15.9275	12.1589	2.58376	0.100197	0.0901773	0.180355	63.4405	1344.1	1.25425	1454.08	0.802509	7410	9		8.5					4.2	2.5	1		4	1.9	0.98	2.7		0.41		7.91	98		1.4	0.8		2.73	129		0.67
KLEIN, 1991	VEM0033-1-005-001	WR	SEIR67	127.08	-48.738	50.0503	1.23589	8.58898	8.67918	15.9673	11.786	2.8964	0.130288	0.120266	0.150332	64.5252	1322.3	1.14816	1362.31	0.781065	7409.16	4.54				372		68.5													134				33.6		138
LE ROUX, 2000	EWI9309-041-007	GL	MARR232	-16.17	-43.427	51.0639	1.23587	9.80648	8.64362	14.5755	11.3435	2.6597	0.0890544	0.0989493	0.148424	61.3385	1367.67	1.2521	1565.2	0.819185	7409.04	15.3		8.83					5.16	3.32	1.08		4.74			3.24			2.12	9.1	112			1.38	42	3.05	97	0.16
Gale et al., this study	HLY0102-R015	GL	GAKK7	84.8633	85.6417	50.4592	1.2353	7.7456	8.9694	17.2956	11.6378	3.1693	0.2	0.1498		67.5788	1282.25	1.02406	1177.65	0.734005	7405.62	17.7055	0.715435	12.0294	39.9953	354.643	0.0142882	76.3297	4.14201	2.42675	1.14204	15.9714	3.81519	2.32013	0.873819	4.16786	4.90025	0.341576	3.7001	9.82202	154.771	0.491099	1.91659	1.34379	34.169	2.96884	234.728	0.246291	0.650637
Gale et al., this study	ALV0981-R023	GL	EPRR14	-109.1	20.833	49.5272	1.23489	8.25959	8.98838	16.4382	12.1667	2.80381	0.0455492	0.106281	0.161953	66.2028	1310.39	1.11287	1335.4	0.785725	7403.17	7.619	0.53	8.316	44.3	333	0.00752	83.1	4.621	2.87969	1.133	16.21	3.72186	2.284	0.965	2.289	5	0.418	1.338	8.436	122.8		1.517	0.61		2.922	140.665	0.085	0.684
KLEIN, 1991	VEM0033-1-005-014	WR	SEIR67	127.08	-48.738	50.6142	1.23138	7.91216	8.88193	16.0341	11.6311	2.9405	0.120843	0.110772	0.142997	66.8942	1290.16	0.946108	1253.27	0.761411	7382.12	6.28				377		68.3													159				32.3		139
DAVIS, 2008	WFL2000-RC7	GL	JUAN15	-126.783	42.65	49.7197	1.23014	9.15311	8.55404	16.2092	11.7657	2.5194	0.139608	0.109692	0.189467	62.717	1347.16	1.26228	1425.13	0.774639	7374.69	25.9		10.07			0.03		4.22	2.67	1.03		3.69	2.01	0.91	4.19		0.4	4.34	8.2			1.61	2.07	40.6	2.78	157.5	0.28	0.67
Gale et al., this study	GIL1979-007-002	GL	EPRR14	-109.06	20.93	48.33	1.23	8.63	8.74	15.89	12.53	2.66	0.062	0.103	0.167	64.576	1336.13	1.2761	1450.95	0.822639	7373.85	9.302	0.37	6.798	43	346	0.00897	79.4	4.642	2.9531	1.112	16.26	3.75534	2.245	0.98	1.819	5.67	0.419	1.405	7.49	114.1		1.269	0.692		2.758	102.371	0.092	0.705
Gale et al., 2011	AII0127-1-017-005	GL	MARR85	-31.518	37.836	49.53	1.23	7.85	8.92	15.57	13.81	2.1				67.1631	1295.5	0.845002	1399.28	0.830341	7373.85	205.351		28.543			0.20097		3.625	2.09799	1.147		3.42798	2.053	0.749	14.284		0.289	25.147	14.44		0.846	3.456	16.408		3.325	260.448	1.356	0.588
Sun et al., 2008	TAG-3375	GL	MARR117	-45.1	25.76	50.539	1.229	8.472	8.21847	15.6602	11.181	2.608	0.101	0.137903		63.5852	1315.03	0.960132	1321.57	0.734438	7367.86	9.20674		8.66972					4.85153	2.98149	1.15463	17.3758	4.04245	2.09505		2.59969	5.69122	0.439236	2.02931	8.43878		0.437495		0.839958	34.8351	3.06955	121.084	0.128566
Gale et al., this study	AII0127-2-R134	GL	MARR92	-34.839	35.415	49.9783	1.22893	8.07922	8.10912	15.2325	12.8723	2.45187	0.568117	0.269108	0.155485	64.3705	1304.63	1.00453	1308.73	0.796666	7367.44	149.761		31.134			0.1546		3.9	2.32236	1.188		3.62142	2.329	0.835	15.528		0.319	25.791	15.241		1.277	3.722	12.626		3.152	233.25		0.621
Kelley, Kingsley, and Schilling, in revision	TRI0164-020-001	GL	GALA5	-97.86	2.24	50.2605	1.22651	9.4802	8.99215	14.7576	12.2945	2.34415	0.0604821		0.161286	63.0633	1359.05	1.21349	1579.16	0.850977	7352.93			7.91	41.38	338.7		71.5	4.7	3.01	0.97	14.82	3.74	1.44	1.04	2.09	5.92	0.437	1.559	7.23	124.7	0.378	1.34		38.11	2.66	87.3	0.1042	0.697
SIMS, 2003	ALV2746-007	GL	EPRR29	-104.29	9.8174	49.9346	1.22594	9.18956	8.62144	15.4488	12.2195	2.58145	0.119604	0.119604	0.159472	62.8076	1348.37	1.23999	1490.07	0.81505	7349.51	9		8.8					4.6	2.7	1.1		4.1	2.5	1	2.8		0.43	2.6	8	95		1.5	0.8		2.8	120		0.73
LE ROUX, 2000	EWI9309-018-002	GL	MARR249	-6.198	-51.053	50.6202	1.22528	9.58516	8.72033	13.9872	12.4734	2.47472	0.189448	0.0997094	0.139593	62.0866	1363.5	1.22877	1616.62	0.873906	7345.55	41		12.2					3.93	2.21	1.03		3.53			5.44			5.28	9.08	68	0.26		2.89	44	2.82	144	0.35
Gale et al., this study	WASPLUM-5-034-001	GL	MARR212	-14.494	-32.657	49.8147	1.22241	9.15675	8.49985	15.9347	11.9391	2.61296	0.134365	0.123417	0.159248	62.559	1347.07	1.26037	1445.95	0.787637	7328.35	27.311	0.56	11.481	43.6	330	0.02679	86.7	4.53	2.83936	1.078	14.32	3.68094	2.069	0.984	4.193	5.21	0.408	5.042	9.147	119	0.468	1.791	2.371	38.7	2.881	128.816	0.297	0.692
KARSTEN, 1996;STURM, 1999	KNO0138-11-042-004	GL	CHIL25	-77.8892	-45.6462	50.8165	1.22237	8.24114	8.17716	15.4801	11.646	2.77904	0.445845	0.168941	0.153947	64.1066	1304.52	0.994412	1267.6	0.755197	7328.11	163		18.88		305		84	3.95	2.23	1.17		3.81	2.21	0.83	7.88		0.332		12.56	95	1.313	2.71	12.34	35.6	3.35	255	0.347	0.682
VAN WAGONER, 1991	TUL1987-011-002	GL	JUAN5	-129.117	48.383	49.8763	1.22187	8.33275	8.94368	15.5137	12.7495	2.43372	0.140215		0.200306	65.8932	1313.59	1.02466	1393.22	0.819602	7325.11	34		12.49					4.63	2.95			3.66	2.4	0.98	5.03	4.6	0.41	5.3	9.48			1.92	3.1	35	2.96	128		0.7
Jenner and O'Neill, 2012	HUD1966-056-VG312	GL	MARR73	-28	45.22	50.7546	1.22114	9.46683	8.68631	15.0553	11.4838	2.31495	0.207879	0.118788		62.2868	1354.34	1.1514	1487.52	0.798232	7320.73	60.4787	0.371762	13.3214	43.8284	347.657	0.0634592	69.17	3.83097	2.51594	0.962307	16.1291	3.24329	1.62293	0.85663	5.76048	5.43994	0.331824	8.4722	8.41591	142.154	0.515033	1.75181	5.08246	37.5	2.67045	105.283	0.449012	0.59922
Sun et al., 2008	88616	GL	MARR124	-45.24	21.7	51.3945	1.221	8.995	8.01	15.142	12.381	2.40648	0.083	0.0733201		61.5812	1333.45	0.993006	1451.79	0.775793	7319.9	8.06513		7.84006					4.16722	2.54108	1.01861	16.6942	3.41187	1.77353		2.36434	5.32327	0.361624	1.69088	7.34287		0.377924		0.76512	38.4025	2.55678	113.85	0.107762
Gale et al., this study	HLY0102-062-002	GL	GAKK7	85.0333	85.6183	49.5859	1.22077	7.69785	8.55982	17.2197	11.5771	3.14737	0.197682	0.158923	0.137401	66.6839	1285.67	1.06545	1179	0.723978	7318.52	17.5209	0.726081	11.5708	39.0115	329.848	0.0157269	76.9768	4.08889	2.40384	1.06398	15.0404	3.80528	2.29321	0.857885	4.03885	4.9157	0.341648	3.73921	9.50063	138.362	0.619694	1.8636	1.26493	35.0217	2.8461	208.109	0.239223	0.639666
DAVIS, 2008	WFL2000-RC14	GL	JUAN15	-126.762	42.719	50.076	1.2206	8.62323	8.31089	16.2881	11.9896	2.68752	0.12971	0.119733	0.159644	63.4343	1323.73	1.12494	1351.78	0.756469	7317.5	30.6		10.07			0.03		4.23	2.65	1.05		3.66	2.04	0.9	4.08		0.41	4.57	8.2		0.38	1.61	2.61	39.8	2.84	139.5	0.28	0.66
DAVIS, 2008	WFL2000-RC8	GL	JUAN15	-126.777	42.666	50.4216	1.22055	8.82485	8.08318	15.8304	12.1076	2.69784	0.129706	0.119728	0.169615	62.2459	1331.04	1.12838	1395.98	0.765401	7317.2	25.3		9.67			0.03		4.37	2.75	1.06		3.84	2.06	0.92	3.79		0.42	3.88	8.22		0.45	1.6	2.17	42.2	2.86	140	0.24	0.68
LEYBOURNE, 1991; KARSTEN, 1988	ENV7115-008-001	GL	JUAN5	-129.07	48.31	50.2931	1.22032	9.65101	8.22635	14.6649	12.7466	2.6036	0.0299265	0.10973	0.209485	60.5412	1368.39	1.3082	1623.63	0.845203	7315.82	5.9		5.18					4.41	2.77	0.94		3.1	1.8	0.98	1.48	4.1	0.39	0.93	5.9			1	0.43	38	2.31	77		0.63
MICHAEL, 1998; PYLE, 1994	MOA8801-027-008	GL	SEIR65	124.965	-49.062	50.65	1.22	7.677	8.04	16.4	10.74	3.41	0.13	0.15	0.15	65.3393	1281.25	0.947681	1162.8	0.694352	7313.9	15.5				302		56.9													119				32.4		163
EISSEN, 1994	YOK0090-009-002	WR	FIJI2	173.592	-16.442	48.9	1.22	8.1	9.45	15.3	11.6	2.49	0.53	0.22	0.15	67.7419	1308.14	1.09436	1298.32	0.827078	7313.9	97			45	290			3.7	2.5	1					8.1			9.55	13	220			11	35		197
INGLE, 2010	EWI0004-077-002	GL	GALA7	-96.191	2.281	50.1494	1.2194	9.39209	8.84574	14.7598	12.7647	2.25477	0.0547694	0.0955976	0.181237	62.8983	1356.8	1.19271	1589.3	0.855909	7310.3	10.8		7.26	45.2	387			4.46	2.79	0.97		3.69	1.85	0.968	2.25		0.455	1.9	7.21	111	0.301	1.33	0.91	46.1	2.63	83.4	0.127	0.704
KLEIN, 1991	VEM0033-1-005-002	WR	SEIR67	127.08	-48.738	50.2035	1.21688	8.53117	8.42077	16.1074	11.8433	2.9006	0.130477	0.110403	0.140513	63.9861	1319.07	1.12021	1342.46	0.764451	7295.2	6.01				350		72.9													135				32.7		136
Kelley, Kingsley, and Schilling, in revision	TRI0139-032-001	GL	MARR13	3.38	72.61	50.8552	1.21478	8.91379	8.13756	15.5973	11.6968	2.37407	0.248255	0.178744	0.208534	62.1678	1331.79	1.05395	1373.04	0.752453	7282.61	74.5		12.25	38.8	314	0.082	73.3	3.99	2.51	0.99	16.49	3.57	1.416	0.867	5.06		0.363	6.79	8.76	144.5	0.585	1.81	6.09	34.1	2.75	115.9	0.458	0.62
DAVIS, 2008	WFL2000-187-R4	GL	JUAN15	-126.819	42.601	50.4303	1.21098	8.94099	8.38769	15.72	12.1835	2.39712	0.0998301	0.119796	0.159728	62.8061	1335.07	1.09518	1426.24	0.77798	7259.83	14.6		8.09			0.02		4.41	2.81	0.97		3.58	1.95	0.95	2.92		0.43		7.17		0.3	1.38	1.39	41.9	2.69	110.2		0.67
DAVIS, 2008	WFL2000-187-R2	GL	JUAN15	-126.818	42.602	50.4503	1.21098	8.95111	8.43942	15.6504	12.2329	2.35544	0.0998303	0.109813	0.149746	62.9232	1335.29	1.08613	1433.53	0.782723	7259.83	15.9		8.3			0.02		4.47	2.78	0.97		3.63	1.91	0.95	3.04		0.43		7.27		0.32	1.4	1.46	40.4	2.67	112.8		0.69
Kelley, Kingsley, and Schilling, in revision	CON2806-046-001	GL	MARR159	-31.286	2.811	51.16	1.21	9.11	8.02	14.36	12.07	2.27	0.1	0.1	0.18	61.3098	1341.37	0.987791	1494.14	0.792148	7253.95	24.3		9.16	44.68	321.1	0.03	75.4	4.43	2.76	1.01	15.87	3.65	1.47	0.99	3	5.14	0.398	3.707	7.99	105.8	0.316	1.56	1.61	39.42	2.7	99.6	0.2359	0.664
Kelley, Kingsley, and Schilling, in revision	END0113-034-001	GL	EPRR64	-114.51	-22.9	51.17	1.21	9.21	8.38	15.15	12.42	2.4		0.04	0.16	62.0894	1343.21	1.07215	1502.79	0.798821	7253.95	0.7		6.37	42.5	355.5		71.1	4.82	3.12	0.94	15.78	3.71	1.3	1.07	1.39	6.21	0.455	0.586	6.55	105	0.195	1.13		41.37	2.58	80.8		0.699
HEKINIAN, 1987;SARDA, 1985	ALV0979-R007	GL	EPRR14	-109.1	20.833	48.75	1.21	8.04	8.85	16.57	11.86	2.77	0.045	0.106	0.16	66.4581	1305.79	1.10559	1298.98	0.768321	7253.95	7.5				321		79													130				37		139
Gale et al., this study	ARGCIRC-104-021	GL	CIRR14	66.05	-19.825	50.5644	1.20991	9.37722	8.22528	15.269	12.2714	2.45748	0.0578503	0.106724		61.2235	1353.66	1.17426	1520.29	0.797507	7253.41	9.273	0.5	7.265	41.2	348		84.2	4.562	3.00791	0.99	16.04	3.57957	1.916	1.018	2.245	5.89	0.435	1.42	7.201	101.5	0.501	1.275	0.66	40.1	2.554	100.5	0.099	0.685
MAHONEY, 2002;CHRISTIE, 2004	MELWEST-10-128-001	GL	SEIR49	110.412	-49.828	50.355	1.206	8.551	8.703	17.433	11.745	2.735	0.287	0.165	0.118	64.6892	1315.03	1.16358	1258.25	0.731906	7229.97	51.1		12.41	37.1	280.1		51.7	4.34	2.81	0.955			1.89	0.974	5.4		0.436	7.04	8.33	138.2	0.6	1.81	4.7	32.2	2.62	150.1	0.417	0.627
LAWSON, 1996	DAR0057-015-001-2B	WR	MARR120	-46.303	24.04	50.14	1.2057	8.58116	8.80313	16.2644	11.6938	2.69896	0.0605373	0.100896	0.161433	64.8699	1319.96	1.09624	1347.74	0.766565	7228.17	6.61		7.71	46.3	385.7	0.009	73.67	4.29	2.65	1	14.58	3.44	1.92	0.95	2.46		0.36	1.65	7.38	133.69	0.415	1.36	0.61	34.5	2.57	111.8	0.111	0.6
LAWSON, 1996	DAR0057-007-001-3C	WR	MARR120	-46.3	23.855	50.0892	1.20339	8.46955	8.63521	16.4698	11.7268	2.59812	0.130913	0.120843	0.161123	64.7292	1315.63	1.07144	1313	0.750554	7214.32	13.67		9	44.2	368		73.9	4.14	2.58	0.96	14.17	3.45	1.93	0.87	3.01		0.37	2.83	7.85	113.87	0.533	1.44	1.41	33.87	2.6	123.7	0.163	0.66
LE ROUX, 2000	EWI9309-018-003	GL	MARR249	-6.198	-51.053	50.6011	1.20332	9.69057	8.7892	13.9271	12.3449	2.47087	0.209064	0.0995543	0.149331	62.0143	1368.09	1.25953	1626.49	0.877975	7213.9	43		12.1					3.71	2.36	1.05		3.54			5.49			5.32	8.9	62	0.31		2.86	43	2.79	143	0.37
Sun et al., 2003	MIR2218-009	GL	BLAU15	-174.817	-15.612	49.6459	1.20152	9.13758	8.19858	16.4981	11.7829	2.71603	0.111065	0.141355	0.201936	61.7595	1347.04	1.30151	1408.99	0.756529	7203.11	25.4		10			0.04	81.1	4.5	2.8	1		3.7	1.8		3.5		0.4	2.1	8.6		0.83	1.6	3	41.1	2.7	140
DAVIS, 2008	WFL2000-187-R1	GL	JUAN15	-126.815	42.605	50.1869	1.20083	8.87114	8.46092	15.8409	12.323	2.38693	0.0998399	0.109824	0.169728	63.1915	1333.31	1.10595	1422.14	0.78258	7198.98	14.4		8.21			0.02		4.47	2.85	0.98		3.69	2	0.96	2.94		0.44		7.35		0.3	1.4	1.36	41.3	2.69	110.3		0.68
Gale et al., this study	MOA8801-029-005	GL	SEIR65	124.468	-48.907	51.08	1.2	7.434	8.45	16.09	10.67	3.28	0.17	0.15	0.14	67.1701	1267.61	0.837963	1130.8	0.705586	7194	20.401	0.82	11.833	36.1	343	0.02037	58.4	4.589	2.91485	1.14	15.24	3.81486	2.35	0.982	4.079	6.18	0.396	3.515	9.676	137.2	0.639	1.884	2.625		3.085	175.256	0.233	0.7
YONOVER, 1989	ALV1555-005	GL	GALA7	-95.65	2.305	51.67	1.2	9.76	8.65	15.31	12.06	2.17	0.08	0.08	0.16	61.4686	1360.14	1.14161	1531.15	0.797156	7194	14				352															119				39		84
EISSEN, 1994	YOK0090-009-003	WR	FIJI2	173.592	-16.442	48.55	1.2	8.532	9.89	15.08	11.25	2.49	0.38	0.21	0.16	67.6008	1328.45	1.20225	1386.03	0.855023	7194	96			42	325			3.8	2.1	1.05					8.3			9.4	12	215			8	35		196
HEKINIAN, 1987	GIL1979-008-002	GL	EPRR14	-109.03	20.93	49.2767	1.19819	8.53835	8.91089	16.8048	11.8611	2.81927	0.0493372	0.105722	0.162108	65.2601	1322.44	1.21101	1343.67	0.771834	7183.15	8.3				337		79.7													136				36.7		139
Gale et al., this study	HLY0102-R001	GL	GAKK13	15.9783	85.5633	47.4033	1.19775	10.3673	9.36047	17.0315	10.8991	2.9842	0.102388	0.107971		61.9075	1410	1.98973	1564.1	0.826619	7180.51	11.8792	0.700186	9.85847	55.8688	415.962		118.669	3.79956	2.26948	0.974321	15.8215	3.2867	1.87256	0.821971	3.31712	4.5266	0.341094	2.16905	7.7652	261.309	0.552068	1.50015	1.00097	34.8118	2.41853	194.046	0.149745	0.581686
DEBAILLE, 2006	CHRRI88-030	WR	MARR124	-45.217	21.817	50.2095	1.19306	8.65372	8.76594	15.5603	12.2036	2.73999	0.0808853	0.111217	0.161771	64.581	1324.45	1.10579	1410.5	0.804792	7152.39	6.37		7.3					4.22	2.64	1		3.67		0.88	2.21		0.36		7.04		0.16	1.26	0.47		2.58	114		0.63
MICHAEL, 2003	HLY0102-062-001	GL	GAKK7	85.0333	85.6183	49.6803	1.1924	7.56219	8.62063	17.1832	11.6207	3.12968	0.205695	0.153502	0.140702	67.2339	1280.48	1.03017	1163.29	0.724399	7148.44	17.9																									208
Kelley, Kingsley, and Schilling, in revision	TRI0154-016-003	GL	MARR77	-29.4	42.39	50.5891	1.19205	9.3248	8.45037	15.4782	11.7231	2.53503	0.138754	0.0891987	0.0693768	61.9946	1350.26	1.18907	1465.95	0.785873	7146.34	44.53		11.69	45.83	396.4	0.044	89.25	4.44	2.9	0.996	18.84	3.72	1.26	0.997	4.69		0.42	6.28	8.22	184.4	0.454	1.7	4	42.71	2.63	110.3	0.4123	0.683
MURTON, 2005	DAR0127-R021	GL	CIRR17	65.32	-18.37	49.2624	1.19183	9.03806	8.14419	15.4938	12.8122	2.5823	0.377414	0.168843	0.158911	61.8609	1348.36	1.32124	1464.01	0.820528	7145.02	64.1		14.5					2.7	1.5	1		3	1.6	0.58	7		0.18	7.8	9.4		0.64	1.9	7.2		2.4	154.8		0.47
LAWSON, 1996	DAR0057-022-002-1B	WR	MARR120	-46.203	24.328	50.5186	1.19091	7.98009	8.07617	16.8829	11.8691	2.622	0.160122	0.110084	0.150115	64.56	1294.24	0.94234	1216.7	0.704089	7139.51			8.71	36.41	387.3		62.66	4.1	2.59	0.97	14.36	3.51	2.07	0.86	3.08		0.4	2.6	7.91	123.85	0.526	1.43		33.61	2.63	126.2	0.159	0.67
DAVIS, 2008	WFL2000-RC16	GL	JUAN15	-126.726	42.776	50.1716	1.19091	8.65134	8.3185	16.0941	12.2277	2.72126	0.069908	0.0898818	0.15979	63.38	1325.19	1.11995	1381.1	0.769485	7139.51	8.6		7.31			0.01		4.23	2.61	0.99		3.57	1.87	0.92	2.48		0.39		7.08		0.35	1.29		38.8	2.62	121.4		0.65
MURTON, 2005	DAR0127-R021V	GL	CIRR17	65.32	-18.37	49.1738	1.18969	9.02181	8.32782	15.5651	12.69	2.57766	0.376735	0.158625	0.148711	62.4277	1348.13	1.32962	1457.71	0.823026	7132.19	63		14.2					3.2	1.7	1.1		3.4	1.87	0.62	7.6		0.25	8	10.4		0.65	2	6.6		2.8	159.3	0.448	0.5
NAURET, 2006	GIMNAUT-PL11-001	GL	CIRR14	65.85	-19.47	50.1077	1.18927	9.35556	8.02754	15.956	11.9521	2.79477	0.0594633	0.0891949	0.17839	60.6994	1355.23	1.30737	1470.56	0.772184	7129.67	9.4		8.3			0.013		4.64	2.98	1.07		3.83	2.05	1.04	2.51		0.42	1.62	8.15		0.57	1.49	0.86		2.87	120	0.11	0.74
MEYZEN, 2003	DUFEDUL-012-001-002	GL	SWIR61	65.35	-27.74	49.6173	1.18808	8.71727	8.08497	17.5292	10.4007	3.55416	0.151027	0.171164	0.161095	62.5389	1327.75	1.34673	1251.14	0.693335	7122.54	21.7		13.58	43	296		69	4.66	3.04	1.06	16.8	3.84	2.19	1	4.96		0.46	3.6	9.9	148		2.05	2.5		3.13	178	0.26	0.69
MURTON, 2005	DAR0127-R022	GL	CIRR17	65.34	-18.41	49.7965	1.18563	9.18864	8.10181	15.2156	12.6467	2.76647	0.247006	0.128443	0.148204	61.3466	1351.72	1.30796	1499.91	0.822351	7107.85	40.5		11					3.5	2	1		3.3	1.73	0.76	5.5		0.3	5.2	8.9		0.54	1.7	4.4		2.7	143.5	0.297	0.55
Kelley, Kingsley, and Schilling, in revision	TRI0138-008-001b	GL	MARR57	-30.02	51.28	51.2008	1.1852	9.14582	8.09889	15.2792	11.4866	3.13091	0.0493835		0.14815	61.4488	1340.72	1.17331	1438.83	0.773262	7105.27	13.88		8.49	40.29	370.2	0.013	67.06	4.85	3.07	1.094	18.24	4	1.65	1.079	2.45	5.97	0.436	1.992	7.98	121.3	0.345	1.43	1.01	38.49	2.94	123.4	0.1424	0.751
Gale et al., this study	AII0127-2-024	GL	MARR81	-29.5367	40.5225	50.5962	1.18499	9.78864	8.48416	14.9767	11.6508	2.15091	0.258906	0.149369	0.169285	60.9394	1369.21	1.24062	1529.84	0.803098	7104.02	72.661		15.378			0.06703		4.104	2.63877	0.939		3.06993	2.067	0.912	6.971		0.425	10.413	9.768			2.127	6.044		2.727		0.598	0.651
Gale et al., this study	HLY0102-R016	GL	GAKK7	84.7517	85.6367	49.7917	1.18425	7.73701	8.70283	17.1521	11.4583	3.05252	0.172535	0.143219		66.9388	1285.51	1.02111	1182.89	0.724126	7099.58	15.8002	0.714434	11.3807	40.5411	344.837	0.0128317	77.807	4.09857	2.38262	1.11375	15.8071	3.72345	2.24443	0.859035	3.8792	4.80342	0.338126	3.29448	9.42443	162.343	0.555871	1.82831	1.20108	33.858	2.87687	223.085	0.22467	0.635505
Gale et al., this study	HLY0102-064-004	GL	GAKK7	84.2783	85.6542	49.436	1.18343	7.95046	8.66219	17.4219	11.3028	3.05575	0.198116	0.136149	0.153925	66.2292	1296.59	1.12481	1193.9	0.719129	7094.66	18.4008		10.7427	36.4386	263.947		62.1722	4.03464	2.42736	1.06867			2.15107	0.867804	3.67436			3.53655	9.03537	173.638	0.430133	1.76847	1.37394		2.75301	183.025	0.242075	0.633907
Arevalo and McDonough (2008)	KNO0115-005-001		MARR117	314.89	25.73	50.06	1.18333	8.5032	9.5	15.7	11.8	2.43	0.0681506	0.09	0.16	66.7885	1316.5	1.02298	1376.43	0.808816	7094.06	3.86979		5.89459					3.87654	2.63864	0.83179		3.06668	1.56244	0.820396	1.56796		0.375706	1.07539	5.49418		0.409795	0.978008			2.01105	91.189	0.0776111	0.575025
Kelley, Kingsley, and Schilling, in revision	END0061-003-001	WR	MARR175	-12.225	-3.433	50.7398	1.183	8.75818	8.70847	15.5679	11.83	2.41571	0.0596471	0.268412	0.178941	64.1549	1324.82	1.00738	1394.37	0.777322	7092.09			6.84	42.28	405.8		72.58	4.64	2.93	0.986	14.06	3.63	1.44	1.008	1.84		0.408	0.916	6.92	150.6		1.27		36.67	2.64	102.1	0.0652	0.678
Kelley, Kingsley, and Schilling, in revision	END0061-016-001	GL	MARR187	-14.66	-12.68	50.3285	1.18231	8.66696	8.64692	16.1115	11.3322	2.68526	0.110216	0.390765	0.180353	64.2325	1322.56	1.08596	1337.17	0.753702	7087.95	21.52		9.79	46.49	353.8	0.03	81.88	4.83	3.02	1.091	15.76	3.77	1.82	1.049	3.25	4.56	0.418	3.577	8.5	185.1	0.374	1.61	1.58	35.31	2.96	127	0.2277	0.727
Gale et al., this study	HLY0102-028-018	GL	GAKK15	2.66083	84.5042	48.9983	1.17974	8.96308	8.71659	16.7448	11.8974	2.89406	0.0605735	0.0936045	0.160864	63.643	1343.06	1.36633	1406.9	0.782139	7072.54	7.54565	0.355407	6.48275	44.4336	555.498	0.0123061	99.2793	4.51131	2.74454	1.03019	16.0658	3.82854	1.90044	0.97474	1.81995	5.26481	0.405384	0.860753	7.20743	145.111	0.31897	1.24394	0.609522	36.7335	2.61196	136.476	0.0617486	0.678135
DAVIS, 2008	WFL2005-885-R3	GL	JUAN15	-126.781	42.686	50.5964	1.17966	8.45226	8.19785	16.1403	11.8228	2.90651	0.0898069	0.119742	0.159657	63.581	1314.51	1.06148	1322.5	0.746505	7072.06	6.1		8.32			0.01		3.99	2.43	0.97		3.43	1.84	0.84	2.91		0.38	1.76	7.31		0.31	1.42	0.51	36.6	2.57	161.6	0.12	0.61
Gale et al., this study	NHOCHEP-091-004	GL	EPRR29	-104.292	9.821	49.2162	1.17709	8.91365	8.88347	16.0667	12.4952	2.54532	0.0804845	0.140848	0.160969	64.2078	1340.79	1.25835	1454.9	0.815856	7056.65	9.3				326		75													121				38.1		131
Kelley, Kingsley, and Schilling, in revision	EWI9309-042-001	GL	MARR232	-16.17	-43.427	49.2785	1.17686	8.84639	8.33774	17.0345	11.1901	2.72273	0.349068	0.129654	0.209441	62.9149	1335.78	1.30552	1296.92	0.729668	7055.28	84.6		13.65	40.75	281.3	0.091	51.1	3.69	2.21	0.978	16.14	3.29	1.4	0.77	5.73	4.4	0.303	7.44	8.9	154.3	0.526	1.86	6.44	26.3	2.66	192.5	0.4676	0.567
Kelley, Kingsley, and Schilling, in revision	TRI0164-018-003	GL	GALA7	-96.18	2.29	50.6712	1.17648	9.4919	8.4782	14.4842	12.7304	2.42704	0.0300529		0.150264	61.653	1359.29	1.18243	1603.91	0.847891	7053			5.3	41.19	368.1	0.011	87.2	4.09	2.64	0.93	15.93	3.35	1.05	0.91	1.48	5.96	0.381	1.016	5.99	103.6	0.291	1.05		40.43	2.35	91.6	0.0723	0.614
LE ROUX, 2000	EWI9309-018-004	GL	MARR249	-6.198	-51.053	50.7673	1.1757	9.62748	8.75606	13.774	12.4206	2.525	0.189551	0.129693	0.149646	62.0792	1364.81	1.22701	1627.63	0.881421	7048.32	42		12.2					3.95	2.38	0.96		3.58			5.48			5.48	8.82	71	0.31		3.07	44	2.74	145	0.37
Gale et al., this study	NHOCHEP-022-003	GL	EPRR25	-103.928	12.763	49.221	1.17528	8.57851	9.17118	16.474	12.1546	2.5615	0.0853833	0.0954284	0.155699	65.8045	1325.48	1.18622	1376.56	0.797355	7045.8	9.1				330		77													143				34.9		136
SIMS, 2002	ALV2746-003	WR	EPRR29	-104.288	9.8154	50.1362	1.17436	8.85287	8.65213	15.9793	12.0347	2.44909	0.100373	0.100373	0.170634	63.7574	1331.79	1.11652	1402.32	0.779565	7040.29	7.62		9					4.5	2.6	1.1		3.9	2	0.98	2.8		0.45	2.9	7.71			1.5	0.9		2.67	124		0.7
Kelley, Kingsley, and Schilling, in revision	TRI0138-001-002	GL	MARR70	-27.39	46.23	50.5307	1.17376	7.77492	8.60938	15.9606	12.0091	2.80903	0.218429		0.158857	66.5908	1286.21	0.914569	1236.81	0.759245	7036.69	85.35		17.77	39.67	351	0.082	65.18	4.18	2.6	1.118	18.44	3.84	1.59	0.904	7.82		0.361	11.13	11.02	139	0.648	2.4	6.6	38.06	3.06	188.9	0.6962	0.669
KARSTEN, 1996;STURM, 1999	KNO0138-11-053-002	GL	CHIL25	-78.3152	-44.5388	50.8683	1.17347	8.69922	8.77606	15.4212	11.9609	2.38612	0.0899849	0.130428	0.16076	64.4874	1322.12	0.981452	1393.64	0.78563	7034.95	14.5		8.29		351		71	4.61	2.84	0.94		3.81	2.04	1.02	2.66		0.443	1.75	8	133	0.348	1.49	1.35	35.9	2.74	103	0.116	0.737
DAVIS, 2008	WFL2005-886-R10	GL	JUAN15	-126.783	42.67	50.0922	1.17178	8.4593	8.52525	16.1432	12.2226	2.51574	0.159981	0.119986	0.149982	64.4638	1316.94	1.05758	1342.38	0.768869	7024.82	28.2		9.89			0.03		3.98	2.41	0.95		3.48	1.82	0.84	4.06		0.37	4.48	7.69		0.33	1.55	2.3	37.9	2.6	142.9	0.26	0.61
Gale et al., this study; RYAN, 1993	NHOCHEP-021-010	GL	EPRR25	-103.935	12.781	49.1501	1.17119	8.93911	9.07925	16.5168	11.812	2.56261	0.121123	0.110112	0.156159	64.6421	1340.27	1.28259	1402.43	0.791636	7021.28	15				392		79													156				35.8		139
Gale et al., this study	POL0059-199-007-04	GL	GAKK13	16.2308	85.5625	48.6282	1.17017	9.68912	8.81035	16.8233	10.9754	3.07663	0.134662	0.10872		62.0745	1373.84	1.6203	1459.23	0.783444	7015.17	31.0013	0.481555	9.27504	48.9167	364.863	0.0362663	99.9467	4.40963	2.71926	1.02211	16.1699	3.7291	1.92851	0.962192	3.1552	5.00132	0.427896	3.62631	8.04866	200.701	0.413987	1.48254	2.659	36.6288	2.6153	137.062	0.219396	0.664165
DAVIS, 2008	WFL2000-RC10	GL	JUAN15	-126.731	42.762	50.3489	1.17011	8.54833	8.2442	16.1601	12.0966	2.76234	0.0798767	0.109831	0.159753	63.4498	1319.13	1.08103	1350.34	0.757136	7014.81	8.6		7.54			0.01		4.31	2.66	1		3.57	1.91	0.92	2.6		0.41	1.87	7.19		0.3	1.32	0.74	39.9	2.69	123.8	0.13	0.67
BOURDON, 1996	AII0127-2-027-004	GL	MARR82	-29.7378	39.5052	51.15	1.17	9.3	8.51	14.86	11.85	2.16				62.2228	1346.48	1.0043	1506.82	0.791097	7014.15	86																									133
LAWSON, 1996	DAR0057-017-001-2A	WR	MARR120	-46.298	24.113	49.86	1.17	8.5545	8.2	15.515	11.88	2.645	0.075	0.105	0.16	63.3082	1323.88	1.06361	1383.94	0.769852	7014.15	11.84		8.46	44.46	425		91.9	4.32	2.76	1.01	14.87	3.68	2.05	0.9	2.74		0.42	2.16	7.74	100.6	0.487	1.42	1.03	38.03	2.74	116.4	0.142	0.7
Gale et al., this study	NHOCHEP-091-002	GL	EPRR29	-104.292	9.821	49	1.17	8.82	8.71	15.84	12.1	2.5	0.09	0.09	0.17	63.9971	1338.46	1.21405	1436.07	0.801813	7014.15	8.39		8.39	42	357	0.0079	81	4.34	2.71	1.02		3.86	2.03	0.96	2.68		0.4	2.17	7.82	120	0.43	1.45	0.7	38.12	2.78	129.5	0.153	0.65
EISSEN, 1994	YOK0090-009-001	WR	FIJI2	173.592	-16.442	49	1.17	8.568	9.85	14.9	11.3	2.45	0.43	0.22	0.16	67.4196	1327.1	1.16209	1383.47	0.85573	7014.15	98			44	320			3.4	2.2	1					7.8			8.5	12	220			9	34		193
BACH, 1996	SON0040-R008-GL	GL	CHIL9	-92.5688	-38.712	50.299	1.16998	8.76182	8.78982	15.7997	12.0998	2.46995	0.0599988	0.099998	0.159997	64.3589	1327.6	1.07496	1406.71	0.788813	7014.03	6.8		6.8	44	359		65	4.5	2.8	1.03		3.6	1.85	1	2.02		0.4	1.3	7.02	110	0.34	1.14	0.474		2.6	97	0.08	0.68
DAVIS, 2008	WFL2000-187-R13	GL	JUAN15	-126.806	42.619	49.4719	1.16911	9.41932	8.55751	16.3449	11.879	2.3642	0.129688	0.0997602	0.169592	62.0538	1359.38	1.33125	1461.66	0.77891	7008.81	22.5		8.42			0.03		3.65	2.29	0.89		3.15	1.64	0.78	3.34		0.35	3.64	6.8		0.3	1.32	2.13	36.3	2.38	122.9	0.24	0.57
Sun et al., 2008	TAG-506	GL	MARR116	-44.81	26.18	50.8672	1.168	8.622	8.587	16.0426	11.686	2.397	0.073	0.12182		64.1923	1318.16	0.9656	1343.07	0.748533	7002.16	5.90839		8.09666					4.89346	3.02233	1.11916	17.1086	3.99003	2.07653		2.35915	5.90752	0.433521	1.49537	8.02568		0.404603		0.608647	35.093	2.85135	107.033	0.10592
Gale et al., this study	NHOCHEP-022-001	GL	EPRR25	-103.928	12.763	49.0123	1.16744	8.60482	9.00739	16.8071	12.0769	2.61667	0.0905771	0.120769	0.161026	65.3285	1327.34	1.23063	1361.01	0.782287	6998.8	8.632	0.62	8.832	40.6	337	0.01	76.9	4.406	2.76285	1.039	15.95	3.54423	1.977	0.942	2.808	5.03	0.381	2.125	8.248	141.8	0.419	1.493	0.722	34.8	2.671	136.932	0.144	0.653
MAHONEY, 2002;CHRISTIE, 2004	MELWEST-10-103-004	GL	SEIR41	102.54	-48.019	51.531	1.167	8.439	8.605	15.979	12.544	2.557	0.088	0.075	0.131	64.7317	1307.7	0.938435	1341.58	0.770836	6996.16	10.3		7.25	40.2	341.1		61.4	3.68	2.3	0.86			1.68	0.81	2.38		0.339	2.05	6.81	99.8	0.336	1.28	0.917	33.4	2.36	105.8	0.12	0.573
Gale et al., this study	MELANTP-131-014	GL	CIRR27	68.12	-8.198	50.2301	1.16666	8.65409	8.47772	16.1025	11.9625	2.77498	0.0617219	0.0975604	0.179193	63.8116	1324.46	1.12097	1370.53	0.768647	6994.13	5.76	0.44	6.747	40.8	360	0.00745	75.9	4.131	2.65221	0.968	15.47	3.31266	1.798	0.9	1.95	5.03	0.372	1.025	6.929	116.9	0.397	1.232	0.44	34.3	2.444	109	0.076	0.628
Jenner and O'Neill, 2012	AII0060-009-096	GL	MARR195	-11.81	-21.93	50.4158	1.16615	8.74088	8.79354	15.6196	12.2819	2.43092	0.0398029	0.0895566		64.4235	1326.17	1.03262	1424.14	0.796847	6991.07	1.19906	0.248053	5.24068	41.8948	407.509		86.4778	4.33578	2.71543	1.0049	16.0741	3.28478	1.67342	0.905517	1.44656	5.05392	0.351153	0.583655	5.72194	123.447	0.249049	0.990376		37.3	2.27734	87.5666	0.042136	0.61529
MAHONEY, 2002	MELWEST-10-088-001	GL	SEIR37	96.833	-47.076	50.867	1.1644	8.79354	8.22986	15.2823	12.6271	2.44894	0.0690828	0.0710852	0.143172	62.7507	1328.23	1.01614	1440.09	0.790662	6980.58	5.2														1.99			1.12	6.53		0.28		0.4		2.41	75.1
Gale et al., this study	WASSIQR-003	GL	EPRR31	-103.953	8.383	49.4724	1.16406	9.26228	9.13183	15.9556	12.1423	2.2378	0.0672343	0.10336	0.162567	63.9594	1352.32	1.25118	1489.41	0.815619	6978.54	3.89	0.24	4.21	43.9	425		88.9	4.11	2.57	0.85	15.1	3.29	1.39	0.92	1.18	5.33	0.39	0.85	4.88	104.4	0.16	0.79	0.26		2.07	65.3	0.06	0.59
Gale et al., this study	MOA8801-027-071	GL	SEIR65	124.965	-49.062	51.6352	1.16295	7.64516	8.38338	16.2814	11.0835	3.07424	0.101126	0.131464	0.15169	66.3731	1274	0.818429	1160.01	0.70263	6971.89	10.768	0.66	9.734	36.7	335	0.0103	57.2	4.603	2.80731	1.085	15.56	3.75906	2.163	0.977	3.21		0.401	1.977	8.626	121	0.414	1.623	0.758	34.7	2.824	140.415	0.143	0.703
MAHONEY, 2002;CHRISTIE, 2004	MELWEST-10-124-001	GL	SEIR48	108.514	-49.025	50.8067	1.16036	8.6671	8.35873	15.6273	12.2272	2.61723	0.0464539	0.0820355	0.136396	63.4497	1321.99	1.02131	1393.74	0.775252	6956.36	3.58		6.36	38	351.5		65.5	3.83	2.36	0.896			1.66	0.854	1.98		0.346	1.1	6.38	97	0.288	1.19	0.323	34.2	2.33	92.1	0.078	0.57
Sun et al., 2008	TAG-537-7	GL	MARR116	-44.86	26.05	50.2317	1.159	9.296	10.181	15.834	9.898	2.76544	0.081	0.119978		66.3454	1345.97	1.2272	1407.43	0.801933	6948.2	4.62219		6.99524					4.08733	2.55799	0.975293	13.4229	3.32484	1.67582		2.03025	4.78515	0.368493	1.14071	6.90891		0.332205		0.439149	29.5485	2.51479	95.7515	0.0796759
DAVIS, 2008	WFL2000-187-R14	GL	JUAN15	-126.802	42.619	50.2105	1.15895	8.84458	8.63055	15.7699	12.3141	2.31231	0.119722	0.0997683	0.159629	63.7213	1332.25	1.08611	1419.43	0.789173	6947.91	19.4		8.67			0.02		4.09	2.57	0.94		3.36	1.78	0.87	3.29		0.4	3.3	7.35		0.32	1.39	1.89	40.5	2.57	113.8	0.22	0.62
SMITH, 1994	AII0125-11-012-B	GL	JUAN11	-130.157	45.17	49.9972	1.15762	9.35077	8.34284	15.568	12.4743	2.35516	0.0898153	0.129733	0.199589	61.6267	1356.04	1.24088	1512.4	0.803376	6939.93	18.9			40.9	273		70.1				17.6							8.91		88.3			1.45	41.5		119
Gale et al., this study	NHOCHEP-116-003	GL	EPRR26	-103.842	12.2	49.546	1.1555	9.01293	8.98279	16.0766	12.2684	2.36125	0.0502393	0.100479	0.170814	64.2088	1341.52	1.20238	1452.87	0.805512	6927.22	4.317	0.4	6.327	44.4	377	0.00588	78.8	4.585	2.99963	1.023	16.24	3.74418	1.945	1.008	1.886	5.78	0.423	1.376	6.917	125.9	0.286	1.205	0.381		2.538	81.781	0.101	0.709
Gale et al., this study1	MELPANR-1-R085	GL	EPRR21	-104.869	15.317	50.1301	1.15392	8.99821	8.45015	16.073	12.0175	2.61078	0.0398589	0.0996474		62.8303	1338.85	1.16631	1427.47	0.774495	6917.75	2.77	0.37	6.083	41.9	363	0.00244	79.2	4.593	2.91898	1.062	15.64	3.56004	2.031	0.989	1.564	5.66	0.412	0.746	6.81	111.6	0.288	1.145	0.226		2.592	96.238	0.06	0.694
Jenner and O'Neill, 2012	GIL0103-027-001	GL	MARR89	-33.68	36.45	50.6361	1.15341	9.65142	8.27164	15.3857	12.1468	1.95576	0.120214	0.120214		60.6713	1363.73	1.15241	1529.37	0.784867	6914.69	34.1448	0.311903	9.41483	44.2783	323.504		80.8934	3.67861	2.29487	0.816582	15.6623	3.01455	1.42775	0.845379	3.89912	4.96622	0.340643	5.93788	6.95354	107.09	0.329032	1.33004	3.16546	38.3	2.10901	85.2735	0.327565	0.522278
Kelley, Kingsley, and Schilling, in revision	CON2806-056-003	GL	MARR155	-32.665	4.613	49.705	1.1528	10.216	8.8595	14.9891	12.0429	2.45165	0.0496808	0.0794893	0.178851	60.9526	1393.15	1.50727	1665.68	0.85779	6911.04			6.68	41.28	315.9	0.017	81.7	4.39	2.74	1	15.03	3.6	1.47	0.95	1.65	3.99	0.386	1.351	7.23	108.7	0.253	1.29		35.4	2.6	88.2	0.0962	0.673
HAASE, 2003	POS0221-695-003	GL	MARR20	-13.48	70.93	50.0136	1.15262	9.63187	8.32891	14.4829	12.5485	2.09476	0.47107	0.200455	0.170387	60.8841	1368.64	1.28565	1555.27	0.845919	6909.96	164		22.2	52.4		0.13		3.77	2.32	0.96	15.2	3.33	1.99	0.81	11.2		0.35	17.97	11.3		0.44	2.74	10.71		2.78	204	0.97	0.58
Gale et al., this study	GIL1979-008-001	GL	EPRR14	-109.03	20.93	50.5276	1.15221	9.27669	8.72475	15.0449	12.2707	2.39405	0.0530898	0.103174	0.173293	62.8654	1348.8	1.14493	1519.8	0.822336	6907.5	10.926	0.35	6.096	41.4	318	0.00799	71.5	4.262	2.71115	0.952	15.07	3.35544	1.851	0.91	1.761	5.34	0.402	1.382	6.342	99		1.105	0.66		2.323	89.293	0.09	0.632
Gale et al., this study	POL0059-297-081	GL	GAKK10	46.9825	86.6767	48.2757	1.15012	9.42381	9.25322	17.3618	10.9077	2.71686	0.171782	0.123114	0.156952	63.8652	1363.84	1.55659	1396.28	0.772172	6894.97	22.6828	0.515195	9.29537	48.622	362.155	0.0243548	80.4583	4.36882	2.79825	0.96568	14.7367	3.67781	1.86834	0.96225	3.35315	4.6024	0.442155	3.91539	7.82665	212.432	0.398905	1.49898	1.81974	38.0782	2.51244	170.428	0.23887	0.642386
EISSEN, 1994	YOK0090-011-003	WR	FIJI2	173.393	-15.972	47.6	1.15	8.64	8.1	16.9	12.16	2.45	0.14	0.13	0.15	62.7907	1339.56	1.32386	1372.64	0.754902	6894.25	13			44	310			4.3	3.1	1					2.85			1.45	9	150			4	35		150
DAVIS, 2008	WFL2000-187-R12	GL	JUAN15	-126.807	42.62	49.3891	1.14852	9.34801	8.55693	16.4431	11.9966	2.35362	0.129679	0.0997534	0.139655	62.231	1356.93	1.32216	1453.68	0.778467	6885.38	21.8		8.43			0.02		3.67	2.3	0.89		3.1	1.66	0.79	3.33		0.35	3.58	6.79		0.27	1.35	1.96	36.4	2.41	120	0.24	0.58
Jenner and O'Neill, 2012	AII0077-2-P009-001	GL	MARR89	-33.66	36.43	50.9257	1.14848	9.60003	8.10191	14.8529	12.2724	2.30146	0.1197	0.1197		60.3033	1361.48	1.1609	1551.16	0.80299	6885.14	30.5196	0.292843	9.50735	45.1922	231.709	0.0195781	80.4286	4.03301	2.52893	0.889707	15.8426	3.1521	1.4573	0.858354	3.73821	4.95665	0.358586	5.45702	7.23203	94.5725	0.283163	1.44294	2.57739	39.5	2.24755	93.0744	0.304712	0.584685
CHRISTIE, 2004	MELWEST-10-088-019	GL	SEIR37	96.833	-47.076	50.626	1.14393	8.98108	8.43734	15.0909	12.6228	2.51763	0.0594249	0.0713099	0.159457	62.8394	1337.03	1.09017	1485.43	0.814611	6857.86	5.24		6.44	42.7	393.4		76.5	4.07	2.7	0.812			1.85	0.894	1.99		0.402	1.12	6.53	95.2	0.388	1.18	0.398	39.2	2.41	75.1		0.58
Jenner and O'Neill, 2012	GIL0103-008-001	GL	MARR89	-33.67	36.48	49.6657	1.14233	8.98633	8.9836	15.6825	12.4029	2.372	0.119058	0.0992154		64.2787	1341.18	1.17736	1468.54	0.821588	6848.27	29.3065	0.325844	9.09372	45.3952	401.911		82.4755	3.41521	2.20726	0.812389	16.9866	2.81195	1.433	0.788657	3.59511	4.59036	0.317173	5.14239	6.6159	143.037	0.337871	1.30856	2.89098	36.5	2.10814	93.024	0.279193	0.483214
BOURDON, 1996	AII0127-2-027-006	GL	MARR82	-29.7378	39.5052	50.58	1.14	9.46	9.31	14.63	11.7	2.17				63.9179	1355.42	1.09582	1561.21	0.839565	6834.3	86																									134
Kelley, Kingsley, and Schilling, in revision	TRI0101-027-001	GL	MARR37	-26.88	61.73	49.58	1.14	9.5	8.27	14.86	11.44	2.06	0.08	0.14	0.15	61.0432	1365.83	1.18	1533.36	0.789053	6834.3	16.25		6.12	52.94	389.7	0.027	113.2	4.2	2.84	0.877	15.21	3.09	1.01	0.95	1.78	5.02	0.425	2.534	6.09	191.3	0.28	1.15	1.228	44.74	2.26	65.9	0.1718	0.615
HEKINIAN, 2000	NAUSTPL-006-014	WR	MARR166	-25.4285	0.6782	48.88	1.14	8.454	8.13	16.99	11.45	2.86	0.12	0.26	0.15	63.3836	1322.84	1.21636	1293.57	0.724217	6834.3			8.62					4.08	2.73	1.09		3.65		0.97	2.75		0.48		8.33			1.51			2.7			0.68
SMITH, 1994	AII0125-11-012-A	GL	JUAN11	-130.157	45.17	50.0724	1.13937	9.37483	8.12552	15.6913	12.4931	2.3487	0.0899504	0.119934	0.209884	60.9395	1356.13	1.2366	1502.73	0.790216	6830.52	18.3			41.6	303		70.3				17.1							2.86		88.1			1.02	42		120
DAVIS, 2008	WFL2000-187-R5	GL	JUAN15	-126.82	42.603	50.265	1.139	8.5863	8.56242	15.9169	12.3893	2.39682	0.109799	0.0998174	0.16969	64.2217	1321.34	1.03773	1378.59	0.779383	6828.31	17.9		8.24			0.02		4.14	2.57	0.94		3.31	1.82	0.89	3.09		0.4	3.2	6.98		0.29	1.36	1.61	41.5	2.52	119.2	0.2	0.62
LE ROUX, 2000	EWI9309-013-012	GL	MARR247	-7.882	-49.993	50.3375	1.13727	9.11292	9.18331	14.9779	12.2607	2.4407	0.0399674	0.0899266	0.15987	64.4622	1343.38	1.13451	1514.31	0.843611	6817.93	4.34		5.97					3.81	2.35	0.93		3.13			1.91			0.97	7.09	148	0.26		0.33	44	2.15	89
Sun et al., 2003	MIR2218-004	GL	BLAU15	-174.817	-15.6533	49.7679	1.13641	9.15967	9.01309	15.2847	12.2677	2.71646	0.109663	0.0398776	0.139572	63.9145	1348.76	1.27684	1506.23	0.843945	6812.78	25.3		10			0.04	73	4.4	2.8	1		3.6	1.7		3.4		0.4	2	8.5		0.84	1.5	3	40.6	2.7	139
MAHONEY, 2002;CHRISTIE, 2004	MELWEST-10-108-003	GL	SEIR42	103.571	-47.972	50.5651	1.13614	8.35915	8.78024	15.6616	12.2969	2.50864	0.112223	0.0913677	0.119175	65.406	1310.12	0.966759	1353.86	0.787984	6811.16	16.4		9.48	43.2	387.8		69	4.12	2.64	0.903			2	0.894	3.51		0.399	3.05	7.85	130.9	0.361	1.53	1.23	38.1	2.66	115.7		0.593
Kelley, Kingsley, and Schilling, in revision	EWI9309-013-001	GL	MARR247	-7.88	-49.993	50.7556	1.13458	8.88748	9.03778	14.7794	12.4898	2.37625	0.0398728	0.0797457	0.159491	64.6698	1331.86	1.01888	1490.49	0.838236	6801.81	7.8		7.22	43.07	420.5	0.01	81.4	4.5	2.89	1.004	16.48	3.67	1.45	1	2.15	4.86	0.41	0.888	7.13	117.5	0.346	1.29	0.5	41.54	2.63	101.1	0.0631	0.683
INGLE, 2010	EWI0004-080-002	GL	GALA6	-96.628	2.113	49.3366	1.13457	8.78782	9.4219	15.4448	12.8221	2.51072	0.0338275	0.0785992	0.178092	65.8689	1335.59	1.19339	1495.9	0.863281	6801.75	4.73		6	45.8	443			4.14	2.61	0.942		3.2	1.77	0.961	1.9		0.406	1.1	6.65	137	0.2541	1.22	0.49	43.2	2.54	84.3	0.081	0.649
Kelley, Kingsley, and Schilling, in revision	CON2806-044-001	GL	MARR159	-31.268	2.867	49.527	1.13444	10.6348	8.89714	15.3699	11.5024	2.23646	0.0994365	0.0795492	0.169042	60.094	1409.43	1.61055	1666.95	0.837372	6800.97	21.8		8.16	48.9	289.7	0.027	69	4.03	2.6	0.92	14.09	3.4	1.34	0.88	2.5		0.385	3.371	7.14	141.1	0.269	1.38	1.3	32.43	2.4	97.1	0.2233	0.601
MAHONEY, 1989	ARGCIRC-107-012	GL	CIRR3	69.833	-24.35	49.36	1.13395	8.74938	8.72008	16.8262	11.6071	2.89456	0.099375	0.0973875		64.2087	1330.89	1.25684	1350.58	0.76229	6798.03	17			44	273		125												7.01	75			1.3	32.9	2.35	155.2
LE ROUX, 2000	EWI9309-012-006	GL	MARR247	-8.003	-49.757	49.69	1.13364	9.96356	8.90663	15.6392	11.5867	2.49154	0.03984	0.08964	0.1992	61.672	1381.18	1.44889	1572.95	0.819548	6796.17	5.76		6.13					4.13	2.44	0.97		3.27			1.85			1.09	6.07	119			0.35	42	2.2	94
Kelley, Kingsley, and Schilling, in revision	CON2806-001-001	GL	MARR174	-12.233	-2.54	50.4658	1.13295	9.26233	8.63623	15.1755	12.4525	2.3454	0.0397525	0.0705607	0.15901	62.6633	1349.07	1.14444	1520.9	0.818846	6792.04			5.42	48.37	410.1		86.78	4.45	2.89	0.942	16.3	3.12	1.2	0.997	1.39	3.4	0.404	0.597	6.13	134	0.156	1.11		40.02	2.45	88.2		0.647
Gale et al., this study	HLY0102-041-SG	GL	GAKK13	17.895	85.6875	50.6846	1.13295	7.60485	8.14381	16.5695	11.5199	3.15743	0.281919	0.156334	0.123694	65.8419	1278.41	0.939352	1155.78	0.711624	6792.04	64.1327	0.59001	12.769	39.2915	516.836	0.0720757	85.0209	4.12096	2.46494	1.03264	14.9138	3.67961	2.13758	0.877977	5.01014	4.96979	0.366023	6.16103	9.48724	115.71	0.573836	1.94506	5.50674	35.6953	2.78749	183.274	0.354381	0.63474
NAURET, 2006	GIMNAUT-PL06-004	GL	CIRR15	65.54	-19.17	49.5944	1.13053	9.5698	8.94504	16.0753	11.2557	2.67756	0.109086	0.109086	0.168587	62.7212	1364.16	1.39575	1474.68	0.795293	6777.53	23		9.34			0.029		4.52	2.94	1.04		3.67	2	0.99	3.36		0.43	3.37	7.98		0.57	1.55	2.26		2.71	121	0.196	0.7
BOURDON, 1996	AII0127-2-024-002	GL	MARR81	-29.5367	40.5225	51.29	1.13	9.62	8.35	15	11.53	2.07				60.9736	1358.61	1.0501	1521.15	0.773575	6774.35	72																									111
Jenner and O'Neill, 2012	MELVULC-5-027-010	GL	AARR3	-6.04	-56.89	49.1823	1.12965	8.41124	8.89015	17.2928	11.5002	2.86807	0.0998979	0.119877		65.5468	1317.01	1.20063	1285.25	0.745441	6772.25	15.2176	0.411359	8.21645	45.9702	296.001	0.0120601	82.1952	3.55465	2.19264	0.960528	16.7165	3.05866	1.61451	0.764125	2.72317	4.29956	0.305226	2.51275	7.20109	140.407	0.451258	1.32774	1.12765	32.2	2.4488	149.309	0.145592	0.525112
Kelley, Kingsley, and Schilling, in revision	VEM0033-7-063-003	GL	AFAR11	50.323	13.288	49.2984	1.12813	10.5326	9.68397	15.1449	11.5209	2.00668	0.0698843	0.129785	0.179703	62.3348	1406.81	1.56316	1690.28	0.873263	6763.14	12.4		7.71	47.29	406.1		83.2	4.88	3.16	0.94	14.88	3.71	1.34	1.08	2.82		0.46	2.248	7.16	168.6	0.266	1.37	1.15	38.85	2.58	70.1	0.1508	0.716
Kelley, Kingsley, and Schilling, in revision	CON2806-002-001	GL	MARR173	-12.635	-2.178	50.1018	1.12366	9.18636	9.22818	15.3636	11.9796	2.40382	0.0695334	0.0894001	0.149	64.3899	1345.8	1.17422	1489.93	0.828669	6736.34	3.36		7.4	41.63	368.6		70.77	4.29	2.67	1	15.99	3.35	1.42	0.94	2.08	4.53	0.371	1.2275	7.67	153.6	0.21	1.4	0.45	34.83	2.59	122.6	0.09745	0.65
HAASE, 1996	MET07/3-23275	WR	MARR15	-0.7283	71.965	50.4017	1.12261	8.88021	8.88021	15.344	11.8805	2.21502	0.311109	0.139949	0.161092	64.2857	1331.72	1.0632	1396.58	0.799003	6730.05	94.8		14.6	46.6	366	0.11	89.9	3.67	2.31	0.94		3.3	1.68	0.77	6.36		0.33	8.36	9.48	149	0.6	2.03	8.51	38.5	2.74	132		0.57
Kelley, Kingsley, and Schilling, in revision	TRI0089-030-010	GL	MARR82	-29.74	39.63	50.2253	1.12252	8.61939	8.5667	15.8193	12.0756	2.18671	0.27795	0.148902	0.337511	64.1448	1322.91	1.0375	1346.93	0.771141	6729.51	78.84		14.48	42.54	414.2	0.071	63.66	3.57	2.17	0.969	17.56	3.3	1.25	0.76	6.36		0.318	9.44	9.08	159	0.757	1.96	6	34.55	2.66	162.8	0.5816	0.562
LE ROUX, 2000	EWI9309-013-013	GL	MARR247	-7.882	-49.993	50.2002	1.12165	9.03778	9.10615	14.9418	12.6299	2.3915	0.0401287	0.100322	0.170547	64.4586	1340.83	1.11909	1522.57	0.851488	6724.29	4.73		6.26					4.07	2.47	0.95		3.72			1.96			1.1	6.74	107	0.36		0.32	45	2.37	91
BOURDON, 1996	AII0127-2-024-001	GL	MARR81	-29.5367	40.5225	51.05	1.12	9.85	8.67	14.5	11.64	2.11				61.3058	1370.34	1.13098	1599.39	0.815873	6714.4	70																									112
Jenner and O'Neill, 2012	WASSOTW-007-VG2110	GL	GALA17	-83.04	3.2	50.1386	1.11981	9.16607	8.42212	15.7519	12.4092	2.41136	0.0403447	0.110948		62.3197	1346.73	1.16826	1481.95	0.793639	6713.26	1.58003	0.277735	5.23014	44.2979	378.554		87.6844	4.42662	2.83247	0.956059	17.476	3.45798	1.57135	0.938129	1.4915	5.05355	0.390115	0.526576	6.10067	124.067	0.246881	1.00844	0.126276	43.7	2.45694	83.2567	0.0361444	0.650429
Kelley, Kingsley, and Schilling, in revision	END0061-015-001	WR	MARR186	-14.41	-12.03	50.1799	1.11955	8.02678	8.78647	16.3035	11.8253	2.78888	0.0999599	0.339864	0.179928	66.334	1297.08	0.984909	1267.58	0.75811	6711.7	14.62		7.63	38.1	288.3	0.022	76.55	3.41	2.08	0.855	14.33	2.91	1.09	0.724	2.5	4.13	0.295	2.374	6.21	120.1	0.337	1.24	0.9	30.04	2.09	160.4	0.1501	0.502
Kelley, Kingsley, and Schilling, in revision	TRI0154-007-001	GL	MARR82	-29.67	39.94	50.5346	1.11894	9.71266	8.76259	15.2472	11.6637	2.10592	0.169761	0.0898735	0.139803	61.8892	1365.39	1.21139	1521.27	0.803207	6708.05	58.13		12.19	44.44	357.2	0.055	63.14	4.26	2.77	0.944	18	3.5	1.3	0.947	5.14	6.12	0.396	7.16	8.37	123.1	0.596	1.73	4.53	41.2	2.59	106.2	0.4579	0.644
Gale et al., this study1	MELPANR-1-061-001	GL	EPRR21	-104.847	15.24	50.5909	1.11817	9.09151	8.31902	15.4235	12.3003	2.56503	0.0495223	0.0990347		62.2222	1341.17	1.11907	1471.42	0.793339	6703.43	3.101	0.4	6.145	42.5	316	0.00401	84.9	4.781	3.04203	1.069	14.97	3.6549	1.905	1.024	1.699	5.64	0.435	0.803	6.894	76.3	0.274	1.201	0.27		2.643	92.936	0.06	0.699
Kelley, Kingsley, and Schilling, in revision	EWI9309-012-003	GL	MARR247	-8.03	-49.757	49.8729	1.11723	9.65251	8.96688	15.6809	11.6944	2.47031	0.0499634	0.0799414	0.139897	62.5769	1366.85	1.33715	1529.11	0.814037	6697.79	6.4		7	43.93	333.4		74.3	4.31	2.8	0.912	16.07	3.38	1.21	0.96	1.89	5.37	0.399	0.955	6.55	136	0.207	1.2	0.54	38.27	2.37	107.8	0.0647	0.637
LE ROUX, 2000	EWI9309-013-006	GL	MARR247	-7.882	-49.993	50.3593	1.11696	9.07431	9.04742	14.889	12.5672	2.40111	0.0299707	0.0999025	0.169834	64.2175	1341.47	1.10925	1524.45	0.847619	6696.18	4.36		5.99					3.98	2.43	1		3.25			1.87			0.96	6.31	111	0.47		0.27	45	2.41	86
LE ROUX, 2000	EWI9309-012-011	GL	MARR247	-8.003	-49.757	49.6695	1.11558	9.92577	8.85032	15.6769	11.6572	2.52538	0.0399115	0.0898008	0.189579	61.6119	1379.1	1.44296	1567.06	0.8184	6687.9	5.36		5.8					4.04	2.3	0.97		3.06			1.87			1.11	6.45	116	0.37		0.47	43	2.05	93
FRETZDORFF, 2002	JCR039B-R053	GL	BSCO5	-29.83	-58.17	50.2976	1.11393	7.25561	8.59033	16.9498	11.2397	2.78985	0.441559	0.311098	0.150531	68.0626	1263.75	0.868305	1075.72	0.699393	6678.01	15.1		9.22	36.3	305	0.021	64.7	4.99	3	1.15	15.3	4.18	2.48	1.07	2.98		0.422	2.26	8.97	76.1	0.588	1.69	1.19	34.5	3.15	127	0.154	0.762
NAURET, 2006	GIMNAUT-PL11-002	GL	CIRR14	65.85	-19.47	50.6127	1.11324	9.47248	8.01135	15.3568	12.1264	2.56443	0.109336	0.0993964	0.168974	60.3544	1357.3	1.22894	1502.02	0.786713	6673.87	17		8.01			0.026		4.4	2.82	0.95		3.52	1.78	0.99	2.81		0.4	2.71	7.17		0.53	1.34	1.63		2.55	102	0.163	0.68
SMITH, 1998	ABP0016-028-016	WR	MARR95	-37.76	33.8	50.0769	1.11168	8.96306	9.41452	15.5105	12.1471	2.11256	0.0808829	0.101104	0.161766	65.4059	1336.98	1.08084	1458.93	0.824198	6664.52	44		11.1		527			4.1	2.7	0.87		3.3			4.4				7.4	346				38	2.3	105
Cooper et al., 2004	AII0127-1-011-006	GL	MARR90	-33.986	36.152	50.5095	1.11133	9.34652	8.64919	15.1705	12.1857	2.1209	0.160614	0.143654	0.160614	62.4865	1352.03	1.13194	1499.44	0.808584	6662.42	42.519		10.862			0.045		3.785	2.4299	0.816		2.85324	1.669	0.842	4.742		0.389	7.966	7.457			1.569	3.022		2.285		0.495	0.591
Gale et al., this study1	WASVNTR-R153	GL	EPRR21	-104.892	15.4	49.9276	1.11083	8.76848	8.52824	16.3825	11.7714	2.84275	0.0500458	0.180179		63.6454	1329.6	1.17445	1373.32	0.764274	6659.43	2.438		5.848			0.00324		4.444	2.79594	1.003		3.43356	1.8	0.98	1.597		0.407	0.772	6.681			1.157	0.244		2.611	99.106		0.664
Kelley, Kingsley, and Schilling, in revision	END0113-040-001	GL	EPRR68	-111.95	-24.61	50.23	1.11	9.31	8.43	15.33	13.1	2.54		0.1	0.16	61.9752	1353.18	1.23308	1558	0.83419	6654.45	2.45		6.03	45.92	414.8		103.2	4.47	2.99	0.975	16.61	3.32	1.14	1	1.5	4.47	0.439	0.634	6.28	107.8	0.275	1.14	0.29	48.02	2.41	97.5	0.05	0.65
Jenner and O'Neill, 2012	WASSOTW-007-VG2111	GL	GALA17	-83.04	3.2	51.28	1.11	9.13	8.68	15.97	12.37	2.11	0.04	0.09		63.1171	1336.62	1.01616	1438.32	0.774943	6654.45	2.49746	0.2609	5.38704	46.4452	414.511	0.00197037	89.3506	4.3576	2.78137	0.896666	17.4865	3.30404	1.65978	0.949984	1.55635	5.10164	0.405434	0.661377	6.13176	151.202	0.243641	1.00086	0.211814	42.9	2.39273	75.6535	0.0427961	0.643065
Kelley, Kingsley, and Schilling, in revision	TRI0164-019-001	GL	GALA6	-97.19	2.12	49.28	1.11	9.33	8.55	15.48	12.34	2.31	0.05		0.17	62.2573	1359.48	1.27342	1531.91	0.816826	6654.45			6.63	43.07	398.3	0.013	79	4.45	2.93	0.94	15.58	3.58	1.27	1	1.97	6.29	0.43	1.377	6.69	146.5	0.314	1.22		41.3	2.51	91.2	0.0916	0.675
LE ROUX, 2000	EWI9309-013-003	GL	MARR247	-7.882	-49.993	51.1058	1.10936	8.91108	9.10908	14.4153	12.3927	2.41397	0.0297668	0.0893003	0.178601	64.7887	1331.07	0.984315	1501.9	0.847036	6650.61			5.75					3.93	2.55	0.87		3.37			1.85			0.94	6.39	104	0.38			43	2.29	86
LE ROUX, 2000	EWI9309-013-002	GL	MARR247	-7.882	-49.993	51.3363	1.10927	9.16819	9.11859	14.1695	12.285	2.31785	0.0300349	0.080093	0.140163	64.1611	1340.95	0.998543	1543.47	0.852651	6650.07	4.48		5.89					3.86	2.34	0.95		3.46			1.87			0.93	6.38	109	0.43		0.32	42	2.52	87
Gale et al., this study	TRI0138-008-001a	GL	MARR57	-30.02	51.28	50.0848	1.10437	9.93034	8.39323	15.3557	11.5212	2.96547	0.0533187			60.3392	1378.8	1.45713	1569.74	0.812114	6620.7	14.529	0.8	11.693	40.8	201	0.01	73.3	6.549	4.17012	1.438	17.18	5.34006	3.185	1.463	3.756	7.54	0.583	2.963	11.963	92.9	0.523	2.184	0.87		4.101	100.92	0.187	1.014
LE ROUX, 2000	EWI9309-013-008	GL	MARR247	-7.882	-49.993	50.6149	1.10349	9.17612	8.9151	14.9503	12.2731	2.42554	0.0402036	0.0904581	0.150763	63.6205	1344.23	1.11208	1512.55	0.830854	6615.42	4.07		6.06					4	2.22	0.91		3.31			1.95			0.91	6.35	109	0.42		0.36	43	2.56	88
Gale et al., this study	WASPLUM-5-053-001	GL	MARR214	-14.524	-33.921	50.5032	1.10331	8.56207	8.71193	15.6355	12.4196	2.51961	0.0499537	0.0899167	0.12988	64.6831	1319.31	1.01356	1396.24	0.794445	6614.34	10.517	0.38	6.411	42.5	382	0.01106	85.9	4.484	2.8466	0.992	13.36	3.50517	1.753	0.977	1.965	5.45	0.403	1.505	6.768	134.2	0.454	1.154	0.879	36.2	2.527	96.919	0.096	0.669
LE ROUX, 2000	EWI9309-012-010	GL	MARR247	-8.003	-49.757	49.4823	1.10313	10.1912	9.07842	15.4896	11.503	2.56873	0.0497811	0.0896059	0.169256	61.5895	1391.72	1.5486	1613.06	0.839731	6613.26	5.81		5.69					4.05	2.71	0.96		3.34			1.89			1.11	6.5	119	0.39		0.45	45	2.41	92
LE ROUX, 2000	EWI9309-013-011	GL	MARR247	-7.882	-49.993	50.4986	1.09857	8.94908	8.99955	14.9124	12.5272	2.43434	0.040024	0.090054	0.190114	64.4147	1335.47	1.07228	1496.68	0.839833	6585.93	4.15		6.1					4.09	2.38	0.95		3.32			1.96			0.96	6.7	116	0.5		0.3	44	2.52	90
Gale et al., this study	HLY0102-041-017	GL	GAKK13	17.895	85.6875	50.7422	1.09804	7.5008	8.11065	16.6355	11.5976	3.16573	0.265972	0.158422	0.126677	66.0597	1273.25	0.910856	1140.78	0.70758	6582.75	69.2597	0.762742	12.6667	38.7684	337.34	0.0690869	81.0766	4.03908	2.5227	1.06721	15.1404	3.64488	2.12252	0.890331	4.97715	5.135	0.349246	6.09477	9.56296	109.824	0.506347	1.8757	5.61801	36.2172	2.79954	192.517	0.36524	0.625555
Gale et al., this study1	MELPANR-1-R084	GL	EPRR21	-104.855	15.273	50.6129	1.09595	9.06565	8.2089	15.5456	12.3433	2.57026	0.0398449	0.0896609		61.9756	1340.34	1.11497	1462.04	0.785261	6570.22	1.991	0.4	6.032	42.2	292	0.00146	83.6	4.704	2.98619	1.029	15.2	3.57957	1.911	0.978	1.533	5.73	0.429	0.576	6.838	74.9	0.295	1.153	0.159		2.591	94.003		0.673
LE ROUX, 2000	EWI9309-013-009	GL	MARR247	-7.882	-49.993	50.6029	1.09572	9.07408	9.12188	14.8274	12.3596	2.38134	0.0302174	0.0906522	0.171232	64.4062	1340.63	1.08166	1513.61	0.842721	6568.84			5.95					3.83	2.23	0.97		3.18			1.9			0.9	6.68	105	0.39			43	2.41	84
NAURET, 2006	GIMNAUT-DR11-001	GL	CIRR15	65.56	-19.06	50.584	1.09532	8.83228	8.25475	16.0216	11.7	2.53916	0.189192	0.129447	0.169277	62.7186	1329.16	1.08917	1353.74	0.749499	6566.44	57		12.26			0.061		3.83	2.45	0.95		3.25	1.99	0.83	5.22		0.33	6.8	8.38		0.6	1.77	4.89		2.5	155		0.59
SMITH, 1998	ABP0016-028-007	WR	MARR95	-37.76	33.8	50.2162	1.09433	8.98545	9.19964	15.475	12.1333	2.15939	0.110521	0.100474	0.160758	64.8247	1337.01	1.07945	1451.5	0.816261	6560.51	45		11.1		481			4.1	2.7	0.89		3.4			4.6				7.4	210				39	2.2	108
LE ROUX, 2000	EWI9309-013-014	GL	MARR247	-7.882	-49.993	50.6433	1.0942	8.94931	9.1405	14.8359	12.4027	2.41752	0.0301756	0.0804683	0.160937	64.7696	1334.95	1.05223	1496.53	0.84209	6559.73	4.5		5.81					3.96	2.46	0.98		3.57			1.73			0.85	6.5	102	0.25		0.32	45	2.27	86
SMITH, 1998	ABP0016-028-003	GL	MARR95	-37.76	33.8	49.9325	1.09393	9.25936	8.72681	15.9972	11.9013	2.27383	0.129287	0.119342		62.9145	1349.85	1.19703	1451.94	0.785877	6558.11	40		11.2		469			4.1	2.7	0.91		3.3			4.6				7.4	194				38	2.4	97
DAVIS, 1998	LEE86NC-3-002	GL	JUAN17	-127.442	41.335	49.6643	1.09369	8.88503	9.18845	16.2413	11.8004	2.5536	0.049715	0.089487	0.159088	65.0529	1335.31	1.19453	1406.33	0.795677	6556.67			7.4							0.93					2.5				7.8						2.4	98		0.64
Gale et al., this study	POL0059-297-sg2	GL	GAKK10	46.9825	86.6767	48.5708	1.09147	9.24483	9.03331	17.7165	10.8774	2.57411	0.161462	0.118099	0.169556	63.7526	1353.71	1.44487	1344.11	0.739366	6543.36	23.2046	0.491594	9.48265	47.6816	338.128	0.0254636	80.9253	4.46653	2.84681	0.99761	15.2516	3.68243	1.89714	0.98254	3.4527	4.51291	0.45328	4.0044	7.9842	190.591	0.417986	1.53125	1.83191	38.4231	2.54069	174.52	0.248255	0.66401
MURTON, 2005	DAR0127-R010-2	GL	CIRR16	65.51	-18.91	50.2284	1.08977	9.5107	8.52	15.5539	11.6902	2.57581	0.148605	0.0990697	0.158512	61.7225	1360.05	1.28923	1486.99	0.795533	6533.17	26.4		8.2					4	2.5	1		3.7	1.75	0.85	3.4		0.37	3.2	7.7		0.66	1.3	2.8		2.7	98.5		0.61
SMITH, 1998	ABP0016-028-076	WR	MARR95	-37.76	33.8	50.086	1.08937	9.11802	9.74652	15.1745	11.9871	2.16021	0.0706858	0.10098	0.161567	65.8011	1343.46	1.11672	1497.42	0.849219	6530.77	44		11.1		546			4.1	2.7	0.89		3.3			4.5				7.3	218				38	2.2	110
YONOVER, 1989	ALV1555-008	GL	GALA7	-95.65	2.305	50.7733	1.08913	9.2279	8.81205	15.1587	12.1785	2.07925	0.0693083	0.0990118	0.207925	63.2202	1344.76	1.05447	1489.76	0.806955	6529.33	13.4				401															131				41		84
MURTON, 2005	DAR0127-R010	GL	CIRR16	65.51	-18.91	50.1609	1.0883	9.39899	8.50856	15.632	11.7735	2.57235	0.158299	0.10883	0.158299	61.9696	1355.26	1.26758	1470.38	0.793365	6524.36	24.8		7.3					3.6	2.2	0.9		3.1	1.66	0.74	3.2		0.32	3.3	7.1		0.5	1.2	2.7		2.3	103.5		0.54
LE ROUX, 2000	EWI9309-012-001	GL	MARR247	-8.003	-49.757	50.0266	1.08787	10.5109	8.92215	14.8816	11.4973	2.57588	0.0396342	0.0594513	0.13872	60.4419	1402.66	1.55876	1679.86	0.853342	6521.78	5.98		6.12					4.25	2.77	0.96		3.39			2.04			1.13	6.54	116	0.19		0.41	45	2.19	92
SMITH, 1998	ABP0016-028-028	WR	MARR95	-37.76	33.8	50.2517	1.08772	8.99163	8.83343	15.7354	12.0497	2.20596	0.1498	0.109854	0.159787	63.8771	1337.43	1.09672	1423.48	0.79144	6520.88	49		11.5		472					0.96		3.5			4.8				8.2	187				39	2.4	120
REYNOLDS, 1997	KNO0115-018-A	GL	MARR122	-45	22.928	48.7767	1.08751	9.28408	9.63651	16.7053	11.2778	2.55765	0.0785421	0.106737	0.172188	65.1365	1355.46	1.40865	1432.4	0.805193	6519.62	7.1		7.47		314		76	3.94	2.55	0.93		3.22			2.38		0.39		6.62	165				36.4	2.27	111
Jenner and O'Neill, 2012	MELWEST-060-002	GL	PARR14	-119.35	-54.43	48.5082	1.08727	10.5217	8.92092	17.143	10.4504	2.84382	0.0199558	0.0798232		60.414	1407.66	1.8141	1539.69	0.775063	6518.18	1.65282	0.259076	3.35246	47.5903	385.457	0.00222961	66.9009	3.39746	1.85029	0.843872	17.7412	2.60173	1.10934	0.700088	0.984057	4.69303	0.265086	0.715996	3.98727	171.845	0.191513	0.634465	0.184501	31	1.91728	114.861	0.0555047	0.489143
LE ROUX, 2000	EWI9309-012-009	GL	MARR247	-8.003	-49.757	49.624	1.08683	10.05	8.95481	15.5241	11.6424	2.55804	0.039963	0.0899167	0.169843	61.5953	1385.11	1.48838	1594.29	0.831885	6515.55	6.03		6.13					3.76	2.53	0.83		3.41			1.86			1.2	6.32	118			0.43	42	2.28	94
Gale et al., this study	HLY0102-027-032	GL	GAKK15	2.75417	84.4833	49.0663	1.08633	8.61969	9.01211	17.0174	11.9182	2.71771	0.0527344	0.0898475	0.140194	65.3012	1326.95	1.24078	1347.17	0.773086	6512.55	7.46037	0.320701	5.63602	44.7879	338.369		95.7538	4.40374	2.6847	0.95975	15.5769	3.67382	1.74137	0.952492	1.57348	5.28789	0.39589	0.789607	6.52402	158.412	0.290156	1.10407	0.63185	35.7602	2.47239	117.546	0.0565312	0.652183
MAHONEY, 2002;CHRISTIE, 2004	MELWEST-10-106-004	GL	SEIR42	103.353	-47.878	50.8853	1.08556	8.1197	8.58851	15.7096	12.294	2.58095	0.134945	0.110955	0.0879642	65.5639	1298.61	0.896304	1304.8	0.771227	6507.93	16		8.67	39.8	370.1		63.1	3.7	2.29	0.921			1.68	0.815	3.17		0.333	3.25	7.31	105.1	0.354	1.44	1.25	36.6	2.38	123.3	0.184	0.564
Gale et al., this study	KNO0115-005-001	GL	MARR117	-45.11	25.73	50.5952	1.0838	8.55294	9.55355	15.3286	11.8665	2.4437	0.0482706	0.091513	0.163919	66.7838	1316.65	0.978147	1393.68	0.819717	6497.38	5.221		5.736			0.00542		4.351	2.98206	0.957		3.44565	1.58	0.947	1.712		0.398	1.144	6.22			1.086	0.427		2.4	93.274	0.079	0.632
SMITH, 1998	ABP0016-028-004	WR	MARR95	-37.76	33.8	49.9153	1.08347	9.08606	9.5864	15.3162	12.0974	2.12853	0.130563	0.100433	0.160693	65.5068	1342.37	1.12818	1481.12	0.842677	6495.4	45		10.8		473			4	2.7	0.86		3.3			4.4				7.5	218				38	2.3	107
Jenner and O'Neill, 2012	ALV0827-003-VG3965	GL	MARR89	-33.62	36.46	51.329	1.08165	9.25182	8.0418	15.0078	12.1045	2.39386	0.119115	0.119115		61.0073	1344.97	1.05168	1473.76	0.779866	6484.49	34.0987	0.300656	9.26954	46.4177	99.3846	0.0307501	85.3996	4.15013	2.53122	0.945584	17.0472	3.35072	1.58154	0.888154	3.90494	4.51859	0.345744	5.04015	7.46204	72.503	0.349909	1.4218	2.91721	42.9	2.5173	99.2862	0.298577	0.596161
SMITH, 1998	ABP0016-028-034	WR	MARR95	-37.76	33.8	49.9651	1.08129	9.03325	9.92558	15.1878	11.993	2.18515	0.070843	0.0910838	0.161927	66.4183	1339.59	1.10938	1488.87	0.856986	6482.33	42		11		514			4	2.7	0.87		3.2			4.4				7.5	204				38	2.2	106
BACH, 1996	SON0040-R049-G	GL	CHIL3	-97.06	-36.887	49.7481	1.07888	8.73989	9.14047	16.0832	12.2872	2.40749	0.0299688	0.0799167	0.159833	65.3079	1329.25	1.12074	1414.53	0.804661	6467.89	4.6		4.9	37	353		66	4.3	2.7	0.97		3.4	1.65	0.95	1.3		0.35	0.54	6.2	133	0.26	1.04	0.26		2.4	74	0.03	0.65
LE ROUX, 2000	EWI9309-013-004	GL	MARR247	-7.882	-49.993	51.1956	1.07877	9.03511	9.1655	14.264	12.3265	2.45151	0.0297499	0.0594998	0.14875	64.614	1336.14	1.00761	1524.09	0.85528	6467.23	4.45		6.05					3.94	2.29	0.97		3.51			1.96			0.94	6.53	104	0.43		0.29	42	2.39	87
Kelley, Kingsley, and Schilling, in revision	AII0073-1-014-004-017	WR	MARR88	-33.3	36.77	50.5358	1.07609	9.30964	8.13601	15.4172	12.5007	2.10189	0.16091	0.150853	0.170967	61.1361	1351.49	1.12762	1485.32	0.786743	6451.16	49.71		11.7	46.06	279.1	0.046	64.84	4.38	2.85	0.993	18.3	3.61	1.33	0.964	4.81	5.62	0.413	8.05	8.28	102.7	0.508	1.69	3.8	44.92	2.69	116.1	0.5049	0.657
MURTON, 2002	DAR0080-157-003	WR	MARR36	-26.645	61.843	49.472	1.07592	10.8869	9.1302	14.7109	12.1166	1.90045	0.0904976	0.100553	0.180995	60.1523	1421.59	1.62667	1774.03	0.885907	6450.14	19.48		6.95		488.16	0.02	114.58	4.07	2.68	0.77	14.84	3.03	1.57	0.91	2.6		0.38	3.4	5.88	176.11	0.26	1.06	1.59	46.02	2.02	80.22	0.22	0.59
SMITH, 1998	ABP0016-028-010	WR	MARR95	-37.76	33.8	49.7324	1.07495	9.34577	9.70114	15.2923	11.964	2.21238	0.0905498	0.0905498	0.160977	65.1379	1354.41	1.22495	1524.8	0.854619	6444.33	42		11		572			4	2.6	0.85		3.2			4.4				7.3	259				38	2.2	102
LE ROUX, 2000	EWI9309-013-005	GL	MARR247	-7.882	-49.993	51.1103	1.07489	9.04043	9.156	14.2689	12.536	2.29921	0.0299201	0.0997337	0.139627	64.5768	1336.37	0.986835	1534.63	0.85817	6443.97	4.9		6.11					3.74	2.56	1.02		3.93			2.03			0.91	6.85	104	0.25		0.38	45	2.55	88
SMITH, 1998	ABP0016-028-058	WR	MARR95	-37.76	33.8	50.1656	1.07455	8.94217	9.68777	15.307	11.9492	2.15152	0.100574	0.110631	0.160918	66.1027	1335.2	1.06795	1455.54	0.836224	6441.93	43		11.2		515			4.1	2.7	0.89		3.4			4.5				7.4	247				39	2.3	108
KLEIN, 1988; KLEIN, 1991; WALLACE, 1992	VEM0033-2-011-006	GL	SEIR58	118	-49.858	48.8077	1.07444	8.38038	9.59946	17.0963	11.2114	3.16857	0.0803982	0.110547	0.150747	67.3399	1317.38	1.29463	1294.17	0.784397	6441.27	10.9		8.64		337		72	3.85	2.48	1.04		3.38			2.6		0.346		7.49	166			0.75	30.1	2.54	148
LE ROUX, 2000	EWI9309-012-012	GL	MARR247	-8.003	-49.757	49.4686	1.07318	9.98878	9.10017	15.5969	11.7425	2.48114	0.0398298	0.0896171	0.159319	62.1194	1383.7	1.48136	1591.77	0.837317	6433.71	6.49		5.95					3.9	2.39	0.91		3.65			1.86			1.07	6.23	121	0.54		0.46	44	2.2	95
Gale et al., this study	HLY0102-076-017	GL	GAKK10	54.095	86.9017	48.4352	1.07209	9.22356	8.81596	17.6231	11.1638	3.06038	0.0687648	0.070661	0.163079	63.2415	1355.24	1.53973	1372.5	0.754522	6427.18	87.1317	0.727943	16.5751	37.0544	258.433	0.101644	70.5297	5.30576	3.22684	1.29556	16.167	4.7525	2.7723	1.14761	6.6169	5.84611	0.468645	8.58434	12.2254	76.1836	0.76579	2.47184	7.76057	35.7611	3.62169	172.63	0.515087	0.820726
LE ROUX, 2000	EWI9309-013-010	GL	MARR247	-7.882	-49.993	50.1676	1.07092	9.3488	9.01929	15.0478	12.3115	2.47591	0.0397459	0.0794918	0.178857	63.4577	1354.51	1.22163	1544.47	0.844695	6420.17	4.03		6.09					3.97	2.28	0.94		3.65			1.93			0.9	6.45	109	0.55		0.24	43	2.39	88	0.07
KINGSLEY, 2002	END0113-005-001	GL	EPRR70	-112.77	-27.21	50.08	1.07	9.21	9.21	15.72	12.01	2.41		0.12	0.18	64.2857	1347.39	1.19388	1484.01	0.817404	6414.65			6.27												2.13										2.19
BOURDON, 1996	AII0127-2-R077	GL	MARR81	-29.647	40.113	51.39	1.07	8.74	8.45	15.28	12.21	1.86				63.5073	1321.67	0.812191	1407.11	0.762247	6414.65	57																									109
Sun et al., 2008	TAG-520	GL	MARR116	-44.87	26.05	50.3247	1.069	8.562	8.667	16.259	12.151	2.273	0.048	0.0954568		64.5651	1318.24	0.982227	1354.6	0.760352	6408.65	3.8779		5.81865					4.353	2.75362	0.949612	16.9155	3.45299	1.59157		1.69072	5.46925	0.39308	1.02325	6.14459		0.288349		0.403168	34.971	2.38926	88.9374	0.0680781
SMITH, 1998	ABP0016-028-084	WR	MARR95	-37.76	33.8	49.8882	1.06882	8.98967	9.90839	15.2963	11.8137	2.19977	0.150056	0.100037	0.16006	66.4874	1338.14	1.12196	1458.53	0.848855	6407.58	52		11.1		533			4.1	2.6	0.9		3.4			4.5				7.3	276				38	2.2	119
Kelley, Kingsley, and Schilling, in revision	END0113-005-001A	GL	EPRR70	-112.77	-27.21	49.9748	1.06775	9.19066	9.19066	15.687	11.9848	2.40494		0.119748	0.179622	64.2857	1347.39	1.19389	1484.01	0.817405	6401.16	6.1		6.27	49.47	389	0.006	91.7	4.09	2.69	0.91	15.96	3.28	1.3	0.93	2.13	4.92	0.39	1.059	6.29	147	0.321	1.14	0.44	45.66	2.31	106.9	0.0723	0.634
KLEIN, 1991	VEM0033-2-011-005	WR	SEIR58	118	-49.858	49.4032	1.06755	7.98093	9.32219	16.8854	11.524	3.02997	0.137358	0.0989789	0.146448	67.768	1297.8	1.11501	1241.2	0.76931	6399.96	9.61				345		71.8													182				30.4		152
Sun et al., 2008	TAG-3378	GL	MARR117	-45.09	25.83	49.8244	1.066	7.749	8.74955	16.7199	11.676	2.452	0.048	0.072		67.023	1286.68	0.870713	1216.11	0.726202	6390.67	4.84821		6.74095					4.2959	2.73675	0.999731	16.5337	3.45077	1.76958		1.94418	5.15278	0.387419	1.22193	6.95563		0.350478		0.488589	33.5212	2.53383	110.018	0.0880999
LE ROUX, 2000	EWI9309-013-007	GL	MARR247	-7.882	-49.993	50.4682	1.06579	9.2062	9.00913	14.9634	12.398	2.36979	0.0399288	0.0798576	0.139751	63.7874	1346.49	1.12676	1525.41	0.839426	6389.41	4.65		6.25					4.13	2.47	0.89		3.56			2			0.94	6.7	110			0.3	44	2.51	91
HAASE, 1996	MET07/3-23276-002	WR	MARR15	-0.6067	71.9717	50.1088	1.06553	8.94019	8.99131	15.6471	11.798	2.22527	0.295701	0.125297	0.16038	64.4165	1335.71	1.1162	1394.13	0.796769	6387.85	81.4		11.6	45.3	389	0.09	89.5	3.61	2.34	0.9		3.1	1.44	0.78	4.83		0.33	6.22	8.14	156	0.43	1.7	7.36	36.7	2.5	120		0.56
LE ROUX, 2000	EWI9309-027-004	GL	MARR240	-13.398	-47.107	48.4307	1.0648	10.709	9.1556	16.2257	11.0356	2.72958	0.0598376	0.109702	0.189486	60.6129	1418.47	1.88893	1633.02	0.835374	6383.48	8.11		7.36					4.11	2.68	0.91		4.07			2.42			1.12	6.96	140			0.57	37	2.3	117	0.09
Gale et al., this study	HLY0102-027-001	GL	GAKK15	2.75417	84.4833	48.9456	1.06439	8.5567	9.13591	17.0671	11.9807	2.63356	0.0613401	0.0930507	0.16876	65.775	1324.51	1.22621	1339.45	0.77648	6381.02	7.02127	0.282848	5.3052	44.7025	408.099	0.0111247	91.6284	4.24165	2.60425	0.930608	15.4338	3.53401	1.659	0.913364	1.44984	5.01389	0.391494	0.704291	6.15003	165.439	0.312043	1.03527	0.553983	35.1965	2.34058	115.77	0.0515554	0.632801
Sun et al., 2008	TAG-516T	GL	MARR116	-44.85	26.1	50.2351	1.064	8.644	8.849	16.3865	11.724	2.364	0.054	0.103137		64.822	1321.57	1.02674	1345.69	0.756788	6378.68	4.09014		6.61589					4.34168	2.76297	0.98379	16.8465	3.43326	1.7127		1.90031	5.43382	0.394927	1.07822	6.65602		0.338741		0.400979	34.7271	2.38701	108.715	0.0746266
Gale et al., this study	HLY0102-027-007	GL	GAKK15	2.75417	84.4833	49.0131	1.06393	8.61589	9.12184	17.0751	12.0128	2.53669	0.0483558	0.0898463	0.149545	65.5849	1326.63	1.21397	1348.38	0.774351	6378.26	6.98456	0.312927	5.26756	44.7711	388.258	0.0109148	99.8646	4.19859	2.60999	0.939625	15.3827	3.53384	1.65216	0.919231	1.44453	5.04284	0.383732	0.705741	6.16119	173.869		1.03557	0.558158	35.0055	2.36027	116.145	0.0528239	0.631969
SMITH, 1998	ABP0016-028-026	WR	MARR95	-37.76	33.8	50.1749	1.06177	9.03523	9.70536	15.263	11.8816	2.11681	0.120421	0.100351	0.160562	65.9111	1338.49	1.08117	1463.59	0.837815	6365.31	52		11.3		529					0.98		3.4			4.7				7.8	211				39	2.5	119
HEKINIAN, 1995	NAUGARR-012-008	WR	EPRR58	-111.95	-13.42	49.3824	1.06027	9.14229	8.89223	16.064	12.5031	2.37059	0.0500125	0.110028	0.150038	63.6465	1348.84	1.25722	1481.3	0.814673	6356.32	2.7		6.81	43	393			4.37	2.51	1		4.04			1.95		0.36		7.12	137					3.11	89
Kelley, Kingsley, and Schilling, in revision	TRI0154-017-002	GL	MARR79	-29.26	41.67	51.1918	1.05922	9.40866	9.03237	14.7424	11.7385	2.23416	0.108981	0.0396295	0.0792591	63.3433	1349.71	1.06754	1508.42	0.820342	6350.02	34.51		8.32	47.78	427.6	0.035	68.68	4.06	2.69	0.822	17.48	3.2	0.97	0.911	3.13	5.92	0.41	4.278	6.27	163.1	0.331	1.22	2.72	42.36	2.2	78.9	0.3144	0.602
Gale et al., this study	HLY0102-079-039	GL	GAKK10	49.6558	86.8317	49.0437	1.05912	9.31467	8.99838	17.1543	10.9048	2.7872	0.118493	0.0755872	0.166412	63.4887	1354.29	1.42625	1377.79	0.757182	6349.42	16.6454	0.423572	7.36678	48.2744	385.159	0.0205394	81.3208	3.80815	2.35197	0.876254	14.2616	3.32117	1.65059	0.827497	2.49126	4.82681	0.365873	2.57257	6.79299	195.342	0.351943	1.26255	1.3757	32.3765	2.26225	137.388	0.158825	0.575397
Gale et al., this study	HLY0102-076-014	GL	GAKK10	54.095	86.9017	48.434	1.05882	9.1519	9.0318	17.6554	10.983	3.06475	0.0684688	0.0796311	0.169229	63.9819	1351.2	1.51663	1356	0.755652	6347.63	4.2679	0.433928	6.28646	48.753	336.226	0.00466236	95.1845	4.20827	2.70474	0.921056	14.5434	3.52053	1.67136	0.92948	1.85861	4.7456	0.428452	1.03576	6.50772	198.754	0.341773	1.15367	0.297539	38.6876	2.2966	143.437	0.0754195	0.623315
Gale et al., this study	HLY0102-027-029	GL	GAKK15	2.75417	84.4833	49.0458	1.05873	8.60602	9.0821	16.9497	11.9907	2.64788	0.068784	0.0881358	0.159226	65.5122	1326.86	1.23124	1349.44	0.778635	6347.09	6.94629	0.291618	5.3721	45.719	314.896	0.00935222	89.5611	4.01481	2.58987	0.941976	15.1369	3.34374	1.55449	0.873257	1.50503	4.50454	0.362607	0.708727	6.04535	160.911	0.231685	1.01999	0.566223	33.9432	2.28041	106.01		0.607961
Gale et al., this study	HLY0102-076-013	GL	GAKK10	54.095	86.9017	48.4683	1.05593	9.32219	8.9992	17.6265	10.8694	3.04925	0.0623658	0.0812947	0.171755	63.4721	1358	1.55123	1373.69	0.75479	6330.3	4.98314	0.508538	5.99054	53.8323	476.545		90.8642	3.99076	2.58023	0.914627	14.4568	3.12584	1.56932	0.87669	1.74305	4.32797	0.389307	1.03438	6.2553	313.918	0.337568	1.07341	0.498659	36.8978	2.21573	135.993	0.0726564	0.591459
Kelley, Kingsley, and Schilling, in revision	CON2806-011-001	GL	MARR170	-15.92	-1.261	49.8335	1.05566	9.03493	9.42034	15.405	12.1209	2.42408	0.110188	0.0801367	0.150256	65.239	1341.35	1.1793	1473.51	0.841113	6328.68	18.4		8.81	42.48	362.3	0.03	73.3	3.94	2.49	0.96	14.26	3.49	1.33	0.87	2.72	4.68	0.355	3.101	7.58	153.9	0.266	1.48	1.73	34.3	2.49	115.1	0.2023	0.6
Gale et al., this study	HLY0102-027-015	GL	GAKK15	2.75417	84.4833	49.1279	1.05493	8.55887	9.04089	16.9923	11.9344	2.71277	0.0542317	0.0865124	0.155246	65.5336	1324.32	1.21994	1338.75	0.773314	6324.31	7.21921	0.298729	5.3716	44.288	351.66	0.0116741	91.0899	4.29073	2.64226	0.944526	15.4112	3.60069	1.68824	0.931216	1.49901	5.12751	0.390735	0.724503	6.28792	158.765	0.231094	1.05647	0.589178	35.173	2.37976	116.151	0.0551132	0.638215
DAVIS, 1998	LEE86NC-2-012	GL	JUAN17	-127.543	40.765	50.6547	1.05283	8.52296	8.62207	15.3503	12.489	2.47061	0.139205	0.119318	0.169035	64.5507	1317.62	0.987123	1388.4	0.799017	6311.72			11							0.9					4.3				8.9						2.8	127		0.65
Gale et al., this study2	WASVNTR-011-007	GL	EPRR26	-103.852	12.2292	49.9586	1.05254	8.74304	9.30218	15.5533	12.5705	2.26269	0.0452539	0.0844739	0.159897	65.696	1328.8	1.06355	1449.03	0.830881	6309.98	4.16973				378.802		77.4283													138.277				37.8071		82.5114
Kelley, Kingsley, and Schilling, in revision	END0061-006-001C	GL	MARR180	-11.322	-6.31	50.1301	1.05071	10.1316	9.25199	15.3425	10.7815	2.40326	0.0997012	0.269193	0.189432	62.1746	1383.49	1.39819	1557.29	0.816069	6299.01	13.94		7.45	45.07	339.1	0.021	87.24	4.54	2.89	0.978	15.33	3.2	1.57	1.008	2.33	5.36	0.401	2.421	7.02	198.8	0.336	1.29	1.11	34.5	2.63	113	0.1513	0.686
BOURDON, 1996	AII0127-2-R072	GL	MARR81	-29.583	40.29	50.6437	1.04842	9.60552	8.87662	14.8975	11.8821	2.09684	0.179729	0.119819	0.179729	62.4541	1361.57	1.17044	1530.47	0.82195	6285.28	48																									93
Gale et al., this study	POL0059-199-008	GL	GAKK13	16.2308	85.5625	49.493	1.04715	8.23721	9.25071	16.851	11.0057	3.02832	0.241243	0.131705	0.151576	66.9035	1308.16	1.17128	1240.22	0.758269	6277.66	73.0958	0.510703	10.5342	45.1761	462.202	0.111929	85.0186	4.1296	2.54738	0.96787	14.0036	3.64773	1.98929	0.891519	4.11788	4.89014	0.390832	5.23905	8.48026	202.115	0.52302	1.67376	7.31608	33.9005	2.6057	156.73	0.309312	0.624546
Gale et al., this study	HLY0102-081-127	GL	GAKK10	46.6117	86.6475	48.5119	1.04638	9.1359	8.62367	17.6554	11.1681	3.08963	0.11197	0.106292	0.1822	62.9503	1352.03	1.52072	1349.99	0.74406	6273.05	15.2139	0.449754	7.32521	44.6929	259.651	0.0211426	92.3347	4.03836	2.50576	0.923324	14.7363	3.50348	1.75348	0.874222	2.43155	6.09056	0.386283	2.5238	6.9679	133.68	0.349316	1.27692	1.37456	35.9616	2.37837	150.704	0.156887	0.611418
SMITH, 1998	ABP0016-028-048	WR	MARR95	-37.76	33.8	50.2807	1.04564	8.9775	9.85635	15.1194	11.7761	2.14503	0.139728	0.0898253	0.159689	66.4002	1335.65	1.061	1455.42	0.844116	6268.61	45		11.1		472			4.1	2.7	0.9		3.3			4.4				7.2	196				38	2.2	107
Kelley, Kingsley, and Schilling, in revision	EWI9309-026-002	GL	MARR241	-13.4	-47.353	49.1256	1.0444	10.3727	9.01155	16.4631	10.693	2.77412	0.0446503	0.0595338	0.143873	60.9953	1398.79	1.68288	1549.72	0.795222	6261.18	21.8		15.15	45.24	269.9	0.028	66.7	7.45	4.79	1.497	18.8	5.91	3.19	1.68	4.74	7.49	0.665	2.554	13.43	138.4	0.942	2.54	1.72	43.16	4.48	128.5	0.1683	1.168
Gale et al., this study	MOA8801-023-001	GL	SEIR66	125.658	-49.613	50.7558	1.04382	9.21373	8.27028	16.3197	10.8598	2.90062	0.0702572	0.100367	0.160588	61.7691	1342.67	1.20173	1367.93	0.730818	6257.7	12.994	0.44	6.211	41.6	332	0.01648	85.1	4.083	2.56432	0.921	15.3	3.18525	1.742	0.882	2.115		0.379	2.191	6.05	136.1	0.275	1.11	1.171	33.8	2.329	108.303	0.143	0.608
SMITH, 1998	ABP0016-028-019	WR	MARR95	-37.76	33.8	50.4481	1.04287	8.99973	9.86986	15.3115	11.4703	2.13072	0.11059	0.0904827	0.160858	66.3756	1335.32	1.04584	1435.62	0.826582	6252.01	46		11		495			4.1	2.7	0.89		3.2			4.4				7.3	216				38	2.3	104
NAURET, 2006	GIMNAUT-PL20-002	GL	CIRR15	65.62	-19.17	50.7972	1.04174	8.90935	8.04619	15.4177	12.6199	2.41088	0.119056	0.109135	0.14882	61.9136	1333.92	1.05239	1435.45	0.781794	6245.23	7.33		7.32			0.012		4.53	2.89	1.03		3.59	1.88	0.99	2.23		0.42	1.28	7.27		0.47	1.32	0.63		2.62	117	0.087	0.69
NAURET, 2006	GIMNAUT-PL19-001	GL	CIRR15	65.73	-19.23	50.6072	1.04069	8.50391	8.06781	15.8482	12.5676	2.36881	0.218049	0.109025	0.138758	63.0682	1317.68	0.992323	1346.77	0.761035	6238.94	51		10.25			0.037		3.68	2.37	0.87		3.07	1.65	0.82	4.36		0.34	6.04	7.34		0.63	1.5	2.93		2.33	125	0.363	0.56
SMITH, 1998	ABP0016-028-030	WR	MARR95	-37.76	33.8	49.52	1.04	9.378	9.99	14.77	11.51	2.11	0.1	0.09	0.16	65.7237	1358.14	1.20249	1545.22	0.870543	6234.8	42		11.9		510					0.99		3.5			4.8				8.3	208				39	2.6	106
HEKINIAN, 1987	ALV0923-R002	GL	EPRR14	-109.12	20.82	48.6889	1.03337	8.46964	9.16993	16.6243	12.1396	2.49815	0.0451473	0.902947	0.160524	66.0882	1323.88	1.18139	1363.25	0.793016	6195.05	10				338		80.3													142				35.5		97.6
Gale et al., this study	HAK9303-006-B2	GL	SEIR1	70.22	-25.802	51.2446	1.03177	7.94059	8.44636	16.0127	11.9261	2.6907	0.0809232		0.161846	65.6906	1288.64	0.843013	1245.19	0.738738	6185.46	13.322	0.46	7.609	40.1	381	0.01315	75.9	4.094	2.56742	0.927	15.03	3.23454	1.756	0.867	2.479	5.2	0.36	1.644	7.262	145.9	0.444	1.33	0.957	36.5	2.479	123.469	0.115	0.603
MURTON, 2002	DAR0080-018-001	WR	MARR46	-32.513	57.913	50.1766	1.03165	10.6139	9.12302	14.5341	11.955	1.94193	0.0606853	0.091028	0.182056	60.7406	1405.61	1.4456	1727.02	0.870864	6184.74	7.38		4.78		467		92	4.55	3.06	0.77	15.2	3.18	1.6	1.03	1.49		0.44	1.28	5.18	179	0.08	0.85	0.67	47	2.04	65.08		0.64
LE ROUX, 2000	EWI9309-045-002	GL	MARR227	-16.772	-40.587	49.6396	1.03083	9.19131	9.3068	15.9744	11.925	2.34908	0.04968	0.129168	0.129168	64.5719	1348.57	1.22927	1466.69	0.814955	6179.83	6.2		6.11					3.65	2.28	0.8		3.7			2.14			1.17	5.73	133			0.36	38	2.09	96
MURTON, 2002	DAR0080-042-001	WR	MARR46	-32.172	58.159	50.29	1.03066	10.3763	8.7909	14.6616	12.2567	1.97037	0.0606269	0.0909403	0.181881	60.3957	1396.43	1.38138	1693.84	0.855088	6178.81	9.95		5.09		367.72	0.01	89.33	4.52	3.01	0.79	16.05	3.22	1.62	1.03	1.6		0.43	1.36	5.35	140.61	0.28	0.88	0.85	45.32	2.06	72.14	0.09	0.64
SMITH, 1998	ABP0016-028-005	WR	MARR95	-37.76	33.8	49.17	1.03	9.252	10.03	15.13	11.59	2.03	0.08	0.1	0.16	66.1173	1354.73	1.19963	1521.93	0.861722	6174.85	42		11		510			4	2.7	0.91		3.3			4.4				7.3	217				38	2.2	101
SMITH, 1998	ABP0016-028-032	WR	MARR95	-37.76	33.8	49.3	1.03	9.18	9.95	14.79	11.64	2.16	0.09	0.09	0.16	66.113	1351.63	1.1801	1528.03	0.871383	6174.85	42		11.1		505					0.93		3.2			4.5				7.6	198				38	2.4	104
Cooper et al., 2004	AII0127-1-012-A	GL	MARR89	-33.761	36.284	50.1305	1.02631	9.20785	9.2967	15.2289	12.3058	2.10953	0.0898521	0.102831	0.166726	64.5059	1347.52	1.12832	1507.5	0.838368	6152.73	21.478		7.591					4.145	2.69977	0.836		3.02529		0.924	2.935		0.424		6.26			1.196	2.067		2.189			0.635
HAASE, 2003	POS0221-695-001	GL	MARR20	-13.48	70.93	49.6501	1.02103	9.7098	8.43851	14.5947	12.7629	2.02204	0.460465	0.280283	0.170172	61.0034	1374.67	1.33886	1575.68	0.858266	6121.07	178		24			0.13		3.63	2.31	0.97		3.37	1.87	0.78	12.3		0.33	17.3	11.8		0.68	2.93	11.7		2.91	208	0.96	0.57
Gale et al., 2011	AII0127-1-R030	GL	MARR88	-33.308	36.716	50.5767	1.02062	8.77015	8.49951	15.2394	12.8796	2.09018	0.178758	0.119838	0.156788	63.5629	1328.11	0.984645	1435.89	0.806235	6118.62	48.8		11.55			0.03996		3.701	2.372	0.867		2.99646	1.578	0.802	5.071		0.345	8.243	7.921		0.382	1.594	3.919		2.183	113.212	0.474	0.55
LE ROUX, 2000; LE ROUX, 2001	EWI9309-045-004	GL	MARR227	-16.772	-40.587	49.3743	1.02046	8.98491	9.61191	16.1025	12.0494	2.34825	0.0397299	0.0595949	0.148987	65.8191	1340.73	1.21095	1447.27	0.826072	6117.66	5.75		6.14					3.82	2.44	0.81		3.45			2.14			1.17	5.88	139			0.4	40	2.33	94
KLEIN, 1991	VEM0033-2-011-008	WR	SEIR58	118	-49.858	48.6	1.02	7.875	9.29	17.1	11.41	2.97	0.104	0.106	0.145	67.9839	1298.59	1.14382	1230.49	0.761763	6114.9	8.34				328		69.8													171				30.7		151
SMITH, 1998	ABP0016-028-024	WR	MARR95	-37.76	33.8	48.81	1.02	9.207	10.11	14.68	11.3	2.09	0.08	0.08	0.16	66.4039	1355.77	1.2011	1537.22	0.875974	6114.9	43		11.2		527			4	2.7	0.89		3.2			4.4				7.3	214				38	2.2	105
Kelley, Kingsley, and Schilling, in revision	VEM0033-7-042-001	GL	AFAR20	43.69	11.938	49.051	1.01877	9.95802	9.58846	15.5213	12.2153	2.01757	0.0599279	0.109868	0.169796	63.4128	1384.57	1.44187	1623.01	0.867862	6107.53	14.9		7.97	48.07	371.9		117.7	3.6	2.28	0.82	14.34	2.91	0.95	0.78	3.27		0.346	3.283	6.4	169.7	0.127	1.28	1.52	38.45	2.06	89.9	0.2109	0.536
PEARCE, 1995	DAR0033-021-001-1	WR	BLAU7	-175.927	-19.44	51.0199	1.01857	9.56261	8.35394	14.6449	12.7414	2.02877	0.079971	0.0699747	0.159942	61.1271	1359.34	1.09542	1575.79	0.824702	6106.33	10.3		5.17	38	437		104	4.4	2.95	0.87		3.42	1.2	0.96	1.63	8	0.46	0.86	5.6	94	0.57	0.93	1.03	35	2.29	77	0.06	0.65
Gale et al., this study	KLM0417-R107	GL	BLAU8	-176.118	-20.285	50.3051	1.01775	9.70713	8.43296	15.1572	12.7433	2.10591	0.0372604	0.0629019	0.174683	60.9943	1368.89	1.23357	1592.09	0.825657	6101.41	6.6946	0.3103	5.5204	46.6337	376.902	0.0087	110.502	4.2531	2.7175	0.8367	13.6714	3.397	1.4988	0.9463	1.612	5.395	0.4261	0.7812	5.8421	103.394	0.3798	1.0191	0.5487	42.9531	2.1499	79.4888	0.0612	0.621
Kelley, Kingsley, and Schilling, in revision	TRI0101-027-007	GL	MARR37	-26.88	61.73	49.4127	1.01561	10.7795	9.47228	14.4699	11.7549	2.35299	0.100555	0.100555	0.191054	61.2661	1417.64	1.68349	1759.44	0.909126	6088.58			6.43	53.8	403.2	0.024	113.5	4.1	2.78	0.828	14.79	3.36	1.03	0.938	1.83	4.22	0.42	2.52	5.95	209.8	0.215	1.12		45.28	2.11	62.9	0.1642	0.594
Gale et al., this study	MOA8801-022-013	GL	SEIR66	125.892	-49.68	51.0814	1.01267	7.95182	8.60364	16.4224	11.0618	3.18355	0.0805962	0.120894	0.161192	66.0735	1288.56	0.942579	1203.67	0.722726	6070.96	15.273	0.61	8.727	38.1	332	0.0166	74.3	4.047	2.63773	0.924	14.55	3.17409	1.8	0.879	2.988	5.86	0.368	1.993	7.317	135.6	0.503	1.402	1.316		2.417	143.069	0.144	0.606
SMITH, 1998	ABP0016-028-074	WR	MARR95	-37.76	33.8	49.2	1.01	9.009	9.78	14.67	11.44	2.14	0.08	0.1	0.16	66.1481	1345.35	1.1153	1501.17	0.857365	6054.95	42		10.9		501					0.86		3.3			4.5				7.5	205				38	2.2	106
YONOVER, 1989; EASON, 2006	ALV1552-008	WR	GALA8	-95.537	2.377	48.8778	1.00929	10.0059	9.9773	15.3579	12.2044	2.07992	0.03031	0.0505167	0.161653	64.22	1387.89	1.48742	1653.68	0.894897	6050.69			6.49	48	398		79	4.23	2.77	0.85		3.47					0.45	1.8	5.75	197				42	2.09	75
Gale et al., this study	AII0127-1-018-A	GL	MARR85	-31.471	37.9793	50.6243	1.00919	9.0638	8.02868	14.8946	13.1993	2.10914	0.226371	0.120665	0.18349	61.4559	1342.27	1.0591	1495.57	0.814508	6050.09	61.359		12.153			0.058		3.376	2.12797	0.818		2.62074	1.924	0.744	5.52		0.337	9.248	7.747			1.675	4.857		2.186		0.522	0.528
Jenner and O'Neill, 2012	AII0032-3-011-116	GL	MARR76	-29.23	42.95	50.4443	1.00675	8.59941	8.21919	15.7052	12.7576	2.12747	0.267091	0.108815		63.2409	1321.93	0.977816	1373.05	0.776007	6035.47	75.5842	0.451962	14.8261	43.2341	280.98	0.0707597	86.1595	3.04278	1.84023	0.831604	15.6901	2.68566	1.34564	0.635079	6.82979	4.11515	0.251227	10.4281	8.75385	103.998	0.662002	1.92012	6.53274	39.8	2.33338	142.467	0.587119	0.464976
PINEAU, 2004; NIU, 2001	NAUOCNT-019-007	GL	MARR93	-36.479	34.746	50.2267	1.00483	9.6337	9.43593	14.7746	11.7641	2.47218	0.0705574	0.0907166	0.221752	63.8081	1364.86	1.27838	1569.85	0.861262	6023.96	5.79	0.12	3.396	55.48	595.1		80.63	2.403	1.543	0.538	14.09	1.748	0.799	0.534	1.106	2.73	0.234	1.05	3.382	251.93	0.09	0.639	0.51	42.8	1.278	102.2		0.329
Cooper et al., 2004	AII0127-1-010-A	GL	MARR91	-34.167	35.945	50.9039	1.00461	9.24102	8.67536	14.7589	12.6	2.04314	0.11772	0.107744	0.170594	62.8228	1345.73	1.03403	1517.77	0.825326	6022.64	30.874		9.022			0.029		3.557	2.3265	0.774		2.63004	1.449	0.796	3.798		0.368	5.588	6.635			1.325	2.237		2.09		0.36	0.552
Gale et al., this study	AII0127-1-005A	GL	MARR95	-37.712	33.91	49.1903	1.00341	9.65574	9.01875	15.7871	12.4523	2.22948	0.0748817	0.0948501	0.180714	62.704	1372.18	1.39324	1563.56	0.838764	6015.44	12.542		5.788					4.06	2.80214	0.772		2.81697		0.935	2.052		0.461		5.476			1.005	1.253		1.975			0.624
Kelley, Kingsley, and Schilling, in revision	EWI9309-009-003	GL	MARR244	-9.91	-49.147	49.4555	1.00295	10.529	9.02537	14.7284	11.8809	2.54562	0.160926	0.0804629	0.150868	60.6755	1407.68	1.65388	1698.63	0.884401	6012.69	38.9		9.93	43.7	300	0.037	83	4.16	2.91	0.863	15	3.15	1.02	0.98	3.64	5.08	0.456	2.714	7.1	128.1	0.376	1.43	2.77	41.22	2.3	129.6	0.1658	0.585
NAURET, 2006	GIMNAUT-PL01-005	GL	CIRR15	65.62	-19.17	50.6684	1.00245	8.56549	8.35706	15.8903	12.3371	2.39199	0.138954	0.0893273	0.148879	63.7182	1318.14	0.988319	1353.13	0.765118	6009.69	32		8.56			0.034		3.85	2.48	0.89		3.12	1.61	0.83	3.35		0.35	3.97	6.79		0.48	1.34	2.77		2.34	110	0.232	0.59
NAURET, 2006	GIMNAUT-DR06-002	GL	CIRR15	65.71	-19.33	50.2334	1.00189	8.12424	8.31272	16.2782	12.4691	2.51961	0.228153	0.128956	0.158715	64.8105	1302.04	0.974518	1278.71	0.754995	6006.33	56		11.99			0.058		3.69	2.39	0.93		3.13	1.78	0.81	5.17		0.33	6.69	8.04		0.71	1.71	4.87		2.45	155	0.396	0.58
BOURDON, 1996	AII0127-2-R084	GL	MARR82	-29.737	39.659	50.8459	1.00127	8.29384	8.75765	15.2858	12.5428	2.00553	0.308543	0.138347	0.155267	65.5251	1305.81	0.85069	1330.34	0.790756	6002.61	103																									155
INGLE, 2010	EWI0004-079-001	GL	GALA6	-96.723	2.098	48.4671	1.00035	9.33301	9.61364	16.3895	12.1864	2.45777	0.0398913	0.0658207	0.186492	64.963	1361.98	1.44927	1504.01	0.844139	5997.1	6.87		5.99	48.1	326			3.4	2.09	0.83		2.89	1.44	0.737	1.86		0.337	1.9	5.8	169		1.09	0.55	34.6	2.03	108		0.535
Kelley, Kingsley, and Schilling, in revision	EWI9309-027-001	GL	MARR240	-13.4	-47.107	48.8979	0.999147	9.70657	9.31262	16.1861	11.8059	2.52614	0.0500986	0.0801577	0.160315	63.3289	1374.36	1.49535	1533.11	0.831426	5989.89	10		8	44.13	318.2	0.012	85.3	4.26	2.83	0.911	15.36	3.38	1.3	0.96	2.5	4.62	0.426	1.027	7.1	145.4	0.419	1.33	0.69	37.28	2.4	111.3	0.0724	0.627
Gale et al., this study	GIL7904-007-036	GL	EPRR11	-108.42	22.42	50.3902	0.994869	9.37988	8.78577	14.8162	12.9261	2.09362	0.0399081	0.139678		62.7698	1355.63	1.11794	1582	0.848327	5964.24	2.686	0.28	4.596	45	389	0.00224	87.2	4.083	2.66048	0.865	15.26	3.03924	1.488	0.886	1.197	4.98	0.398	0.642	5.231	85	0.193	0.891	0.206		2.093	73.39		0.584
Jenner and O'Neill, 2012	LYN1973-049-VG1679	GL	MARR52	-35.09	53.19	50.8444	0.994628	9.31704	8.32895	14.9418	12.9329	2.09311	0.0299238	0.099746		61.6727	1350.7	1.05629	1548.81	0.817292	5962.79	3.80215	0.190877	3.7293	45.2489	414.415	0.00492564	94.4251	4.01424	2.74944	0.850832	16.5465	3.04829	1.3215	0.91853	0.951397	4.99226	0.397473	0.615944	4.45348	112.316	0.169608	0.740095	0.322193	43.4	2.06666	60.956	0.0358882	0.588852
Jenner and O'Neill, 2012	ALV0827-003-VG3966	GL	MARR89	-33.62	36.46	50.7504	0.993758	9.29881	8.31135	15.1173	12.6357	2.09128	0.119591	0.129557		61.669	1349.96	1.0741	1510.49	0.804017	5957.58	37.5609	0.229572	9.59664	45.2258	350.903	0.0363111	82.7351	3.68529	2.43287	0.805712	16.4192	3.00255	1.32347	0.810286	4.32499	4.49235	0.352901	6.01117	6.86015	106.783	0.327024	1.36219	3.50697	42.7	2.19291	79.5208	0.354631	0.541953
Gale et al., this study	AII0127-2-025-002	GL	MARR81	-29.5955	40.258	50.7703	0.992577	9.38978	9.14164	15.107	11.901	1.97523	0.119109	0.0843691	0.138961	63.6685	1351.21	1.07564	1497.81	0.816191	5950.5	34.784		8.719			0.03475		3.712	2.49504	0.803		2.81511	1.513	0.826	3.566		0.371	5.066	6.63		0.304	1.34	2.878		2.131	80.295	0.286	0.562
LE ROUX, 2000	EWI9309-027-003	GL	MARR240	-13.398	-47.107	48.5374	0.991172	10.202	9.33088	16.0569	11.8602	2.40847	0.0496987	0.0695782	0.218674	62.2114	1398.05	1.6705	1613.87	0.851419	5942.08	7.28		7.23					4.1	2.74	1.03		3.77			2.48			1.09	7.3	135			0.52	44	2.55	104	0.07
MURTON, 2005	DAR0127-R003	GL	CIRR16	65.55	-18.97	50.1471	0.991049	9.41497	8.62213	15.4604	12.1899	2.47762	0.0991049	0.0891944	0.158568	62.2417	1357.06	1.25239	1507.16	0.813455	5941.34	15.5		6.2					3.3	2.2	0.8		2.3	1.11	0.71	2.4		0.28	1.9	5.4			1	1.7		1.8	80.4		0.46
Jenner and O'Neill, 2012	GIL0103-027-003	GL	MARR89	-33.68	36.45	50.9901	0.987579	8.56759	8.16946	15.2297	13.1432	2.06858	0.150106	0.110078		63.186	1318.94	0.883977	1412.42	0.789576	5920.54	47.0818	0.301136	10.7631	43.7799	395.983	0.0452045	89.9279	3.48269	2.15948	0.836267	15.5529	2.82999	1.3536	0.762914	4.86238	3.97248	0.306844	6.93052	7.34103	109.002	0.382187	1.50409	4.12633	39.6	2.27111	104.4	0.394897	0.510625
Gale et al., this study	GIL0103-027-003a	GL	MARR89	-33.682	36.452	50.9901	0.987579	8.56759	8.16946	15.2297	13.1432	2.06858	0.150106	0.110078		63.186	1318.94	0.883977	1412.42	0.789576	5920.54	45.78	0.348	10.595	41.353	396.902	0.047	77.325	3.539	2.173	0.807	13.78	3.044	1.409	0.767	4.633	4.418	0.329	7.623	7.386	107.6	0.356	1.521	3.904	38.845	2.175	106.469	0.427	0.535
KARSTEN, 1996;STURM, 1999	KNO0138-11-063-005	GL	CHIL23	-82.4273	-43.873	48.5566	0.986166	9.55657	9.24603	16.4849	10.6986	2.80486	0.450782	0.168292	0.172299	63.5237	1368.69	1.58513	1397.59	0.799932	5912.07	115		16.48		307	0.143	75	3.93	2.52	0.87		3.13	1.93	0.9	8.41		0.43	10.2	8.71	164	1.054	2.06	11.36	35	2.35	150	0.595	0.618
Gale et al., this study	HAK9303-R005-PET2	GL	CIRR1	69.917	-25.29	49.697	0.982466	8.03501	8.91336	17.0148	12.0275	2.59516	0.109795	0.110195		66.6307	1298.83	1.00982	1251.09	0.748904	5889.88	15.223	0.54	8.228	40.1	372	0.01465	67.2	4.28	2.7432	0.98	15.59	3.38613	1.85	0.933	2.664	5.7	0.385	1.874	7.599	137.2	0.476	1.381	1.296	33.7	2.488	127.888	0.127	0.646
Jenner and O'Neill, 2012	GIL0103-027-015	GL	MARR89	-33.68	36.45	50.8832	0.973149	8.408	8.5761	15.2863	12.9279	2.10276	0.15106	0.110777		64.7389	1310.96	0.858595	1383.66	0.797076	5834.03	45.379	0.285477	10.2881	43.7385	392.577	0.0442568	84.675	3.22481	2.00064	0.839324	14.4184	2.60782	1.24833	0.710389	4.43315	4.0437	0.278302	6.77562	6.75034	115.838	0.359086	1.39567	3.77607	38	2.12617	100.503	0.370219	0.449227
Gale et al., this study	KLM0417-R025	GL	BLAU8	-176.143	-20.33	50.5179	0.971654	9.42476	8.21677	15.2856	12.7576	2.24205	0.0578738	0.0697712	0.169891	61.0787	1356.69	1.16895	1533.77	0.80744	5825.07	8.1344	0.2393	5.4707	43.4073	344.516	0.0195	102.133	3.9433	2.5318	0.811	13.203	3.2028	1.4174	0.8801	1.6573	5.2316	0.393	0.8335	5.7112	93.3574	0.305	0.996	1.089	42.6805	2.0722	89.1051	0.0641	0.5792
Gale et al., 2011	AII0127-2-037	GL	MARR86	-32.3	37.256	50.9696	0.970764	8.98973	8.21035	14.9046	12.9085	2.122	0.169561	0.128906	0.169561	62.1777	1336.46	0.996229	1472.12	0.806421	5819.73	50.338		10.6					3.754	2.36269	0.821		2.88858		0.805	4.499		0.349	7.663	6.94			1.517	3.999		2.175	110.025	0.467	0.54
DAVIS, 2008	LCH1988-83-D4-15	GL	JUAN15	-126.762	42.757	49.3648	0.970484	8.15122	9.54106	16.9049	11.8198	2.73658	0.0401724	0.0602586	0.150646	67.8137	1305.56	1.10096	1285.34	0.781863	5818.05	5.9		6.02					4.11	2.54	0.95		3.43	1.72	0.89	1.95		0.38	1.14	6.34		0.33	1.13	0.51	39	2.46	106.4	0.08	0.62
HEKINIAN, 1996	NAUPITO-019-002	WR	EPRR66	-115.623	-24.2892	49.1786	0.969834	8.48503	8.89014	16.8206	12.9311	2.11141	0.0606146	0.131332	0.131332	65.3492	1321.74	1.08606	1369.56	0.783809	5814.15	3.99		5.051	41.3	463		87.2	3.75	2.26	0.85		2.66			1.513		0.31	0.69	5.74	153					2.32	82
[4593][1105]	s KK141		MARR27	-16.73	65.72	48.6511	0.967992	10.1126	8.93531	15.5462	13.1917	1.94202	0.0784858	0.0845232	0.173071	61.3966	1396.44	1.54614	1684.15	0.876413	5803.11	49		9.26		407		125	3.66	2.16	0.81		2.95		0.72	3.54		0.32	4	7.7	118		1.39		42	2.07	114
Gale et al., this study	POL0059-299-001	GL	GAKK10	46.2933	86.7475	48.1028	0.967509	10.2067	8.5279	17.6273	10.8538	3.10821	0.0537227	0.0872369	0.184278	60.0629	1398.46	1.86538	1479.89	0.760861	5800.22		0.416913	4.85035	55.2045	347.814	0.00633618	84.4288	3.84852	2.48363	0.799326	15.514	3.06294	1.3729	0.860711	1.4831	4.58464	0.395228	0.95187	5.0595	225.154	0.276277	0.868265		33.9407	1.88195	135.981	0.0700451	0.550615
Cooper et al., 2004	AII0127-1-R059	GL	MARR83	-30.224	38.608	50.2373	0.964611	7.52396	9.308	15.0002	13.8188	1.87751	0.306289	0.148172	0.153144	69.0096	1277.93	0.710816	1314.14	0.84848	5782.84	81.036		15.449			0.06766		2.822	1.69783	0.879		2.59098	1.562	0.586	7.253		0.228	10.261	9.635		0.616	2.097	6.088		2.353	186.856	0.599	0.542
Gale et al., this study	HAK9303-R007	GL	SEIR1	70.106	-25.697	50.5193	0.964299	8.13409	8.43387	16.468	12.1112	2.72802	0.079967	0.0899008		65.1123	1299.99	0.956518	1273.61	0.743856	5780.97	12.328	0.44	7.184	39.8	379	0.01129	72.2	3.956	2.59948	0.946	15.16	3.24756	1.718	0.861	2.286	5.44	0.351	1.536	6.969	112.9	0.455	1.199	0.952	35.1	2.315	132.136	0.108	0.602
Gale et al., this study	GIL7904-015-022	GL	EPRR11	-108.342	22.517	47.812	0.960241	8.83221	9.69243	17.7044	12.6032	1.88047	0.0300075	0.0800201	0.16004	66.3901	1342.19	1.30705	1398.15	0.798334	5756.64	2.31		3.98	38	359		80	3.33	2.1	0.7		2.66		0.72	1.11		0.33	0.84	4.31	137	0.24	0.74	0.19		1.63	56.9		0.49
Kelley, Kingsley, and Schilling, in revision	EWI9309-045-003	GL	MARR227	-16.77	-40.587	49.6459	0.958218	9.12078	9.48716	15.9509	12.0117	2.36227	0.0297286	0.0594573	0.128824	65.1848	1345.3	1.21035	1464.17	0.824484	5744.52			6.74	44.18	343.3		81.8	3.61	2.35	0.797	13.56	2.99	0.91	0.8	2.05	4.43	0.357	0.919	5.87	177.1	0.261	1.08		31.83	2.02	103.7	0.0593	0.482
Bezos et al., 2009	KLM0417-007-005	GL	BLAU7	-176.034	-19.795	50.274	0.956688	9.2532	8.11303	15.6013	12.9614	2.29044	0.0431968	0.0639878	0.17854	61.2133	1350.75	1.16632	1507.31	0.799288	5735.34	6.8648	0.3031	4.772	42.9348	358.88	0.009	96.7752	3.7728	2.399	0.7763	14.7797	2.9879	1.3029	0.835	1.3674	4.8444	0.3769	0.7526	5.2396	92.7763	0.3915	0.9022	0.7586	41.5035	1.8864	100.49	0.0585	0.5492
Gale et al., this study	KLM0417-010-001	GL	BLAU8	-176.155	-20.383	50.8169	0.949346	8.84417	8.00015	16.173	12.3797	2.17748	0.0887965	0.0720652	0.166304	61.9515	1329.17	1.00264	1372.84	0.740971	5691.33	14.621	0.3124	5.1819	41.3375	307.597	0.0318	94.9739	3.6353	2.3024	0.7822	15.0254	3.021	1.3509	0.8011	1.4861	5.1167	0.357	0.5235	5.6984	108.232	0.4749	0.9744	1.3825	40.8684	2.0085	119.11	0.042	0.5354
SMITH, 1998	ABP0016-028-054	WR	MARR95	-37.76	33.8	49.3983	0.948119	8.85228	9.7239	15.5717	12.8404	1.99879	0.0903977	0.0803535	0.160707	66.4118	1336.51	1.11002	1483.07	0.860245	5683.97	29		9		488					0.82		3.1			3.5				6.3	193				41	2	87
Kelley, Kingsley, and Schilling, in revision	END0026-016-001	GL	MARR12	7.39	73.41	51.0683	0.944406	8.8312	8.31881	15.8339	11.9457	2.43134	0.0904219	0.0602812	0.140656	62.902	1326.76	1.00504	1370.45	0.75535	5661.71	24.8		7.24	45	340	0.024	75.1	4.83	3.03	1.07	18.14	4.02	1.385	1.079	2.35	7.17	0.434	2	7.43	135.1	0.48	1.34	1.87	38.3	2.83	102.6	0.1387	0.741
Bezos et al., 2009	KLM0417-007-004	GL	BLAU7	-176.034	-19.795	50.2678	0.941934	9.13611	8.14599	15.7215	12.948	2.28337	0.0406067	0.0712133	0.183235	61.6112	1345.47	1.13668	1483.71	0.793571	5646.89	6.3918	0.2825	4.7366	43.0854	333.702	0.009	96.203	3.7349	2.4078	0.7688	14.8914	2.9895	1.2932	0.825	1.3551	4.9834	0.3759	0.7266	5.2555	99.1801	0.3816	0.9	0.7759	42.0036	1.9021	99.8744	0.0583	0.5446
Gale et al., this study	KNO0115-007-002	GL	MARR118	-45.43	25.15	47.8	0.94	8.19	9.15	16.5	12.2	2.59	0.048	0.084	0.154	66.7883	1318.35	1.1954	1348.77	0.803944	5635.3	2.952		5.158			0.00371		3.968	2.53433	0.9		3.03273	1.6	0.828	1.506		0.343	1.021	5.701			0.982	0.253		2.229	102.942		0.583
Jenner and O'Neill, 2012	AII0032-3-011-090	GL	MARR76	-29.23	42.95	49.8339	0.939651	7.99343	9.35641	15.4768	13.1179	2.12638	0.278191	0.109289		67.8138	1299.18	0.89678	1343.16	0.836427	5633.21	71.2754	0.413997	14.3657	43.6617	466.35	0.0650246	103.826	2.74741	1.67044	0.85848	14.7862	2.54857	1.30572	0.590421	6.4978	3.3965	0.22393	9.53804	8.51294	148.795	0.661921	1.84621	6.12042	39.8	2.29562	156.613	0.516865	0.421897
Kelley, Kingsley, and Schilling, in revision	VEM0033-7-064-003	GL	AFAR10	50.692	13.337	49.875	0.938213	9.85123	9.52186	15.3707	11.9273	1.94629	0.0399239	0.0998099	0.169677	63.5012	1374.43	1.28251	1582.91	0.845195	5624.59	9.3		4.5	49.05	384.5		91.3	4.01	2.67	0.72	14.14	3.09	0.79	0.9	1.06	4.7	0.406	1.183	4.43	174.6	0.195	0.8	0.64	40.4	1.84	61.2	0.0758	0.565
MURTON, 2002	DAR0080-153-003	WR	MARR37	-26.902	61.73	48.8658	0.938175	10.2957	10.2594	15.0108	12.2165	1.836	0.0504395	0.0706153	0.181582	64.2046	1400.96	1.52647	1713.59	0.92028	5624.36	11.16		4.77		537.46	0.01	120.1	4.04	2.73	0.71	14.47	2.83	1.35	0.92	1.66		0.39	1.99	4.65	225.81	0.21	0.78	0.99	48.34	1.81	63.86	0.13	0.57
PEARCE, 2005	SON0069-079-001-1	GL	BMRN4	144.784	16.0795	50.9496	0.93778	7.08113	8.21491	17.7225	11.4411	2.60595	0.230566	0.140344		67.6187	1252.41	0.731784	1031.57	0.64925	5621.99	50		7.99	37.6	273	0.08	54	3.47	2.1	0.86	14.2	2.89	1.62	0.75	3.13		0.31	2.22	7.07	164	0.9	1.34	4	27.7	2.34	154	0.136	0.55
MURTON, 2002	DAR0080-093-001	WR	MARR42	-30.397	59.318	49.995	0.937218	10.2761	9.06985	14.9552	12.2544	1.9349	0.050388	0.0705433	0.181397	61.3707	1393.07	1.38354	1669.98	0.857872	5618.62	5.46		3.87		438.38		102.18	4.2	2.82	0.73	14.6	2.9	1.41	0.94	1.14		0.37	0.91	4.51	156.19	0.2	0.71	0.53	45.54	1.86	69.42	0.07	0.58
Jenner and O'Neill, 2012	AII0032-3-011-037	GL	MARR76	-29.23	42.95	50.0086	0.936996	7.9909	9.58657	15.4035	13.022	2.00659	0.237776	0.0990733		68.3488	1297.48	0.850212	1345.8	0.839452	5617.29	69.3466	0.365107	14.0694	44.2653	490.693	0.0645704	106.283	2.80118	1.70427	0.82686	14.931	2.56274	1.35158	0.600701	6.39339	3.4096	0.237846	9.22161	8.41724	157.22	0.651118	1.82296	5.89698	40.6	2.2657	155.985	0.512853	0.417412
HAASE, 2003	POS0221-700-002	GL	MARR20	-13.65	70.85	51.2269	0.935015	9.8475	8.30572	14.2142	12.0159	2.16844	0.258621	0.288462	0.149205	60.2888	1370.76	1.17421	1570.81	0.825083	5605.41	105		15.4	53.5	334	0.09	96.4	3.95	2.61	0.86	15.1	3.23	1.63	0.87	7.53	2.98	0.38	11	8.62	115	0.58	2	6.61	41.73	2.5	104		0.59
PEARCE, 2005	SON0069-G071-001-7	GL	BMRN6	144.834	16.9852	49.482	0.932148	7.78975	8.07886	16.8484	13.1229	2.60856	0.261953	0.141051		65.118	1293.48	1.00064	1246.22	0.751349	5588.23	44		9.33	38.3	262	0.04	69	3.21	1.93	0.9	14	2.7	1.57	0.67	3.68		0.28	3.56	7.48	72	0.6	1.49	2.8	38.5	2.36	232	0.236	0.49
Arevalo and McDonough (2008)	DUF0034-005		SWIR29	40.65	-43.89	51.8885	0.930276	8.125	8.54624	15.8017	11.4362	2.39679	0.170113	0.0700465	0.18012	65.4376	1292.09	0.777099	1229.02	0.725351	5577			7.15915		297		80	2.71829	1.54139	0.933176		2.48053		0.537458	3.5273		0.199289		6.26329	97	0.462	1.15252		35.9	2.07052	220.1		0.402843
Jenner and O'Neill, 2012	ALV0825-005	GL	MARR89	-33.67	36.44	50.98	0.93	8.6	8.41	15.21	13.48	1.92	0.1	0.1		63.7712	1319.34	0.859192	1440.06	0.806918	5575.35	26.4957	0.27157	7.61137	44.146	440.939	0.0274283	97.2858	3.65773	2.33337	0.775758	16.0172	2.79451	1.36264	0.799759	3.17151	4.12119	0.336088	4.12842	6.16372	121.026	0.266543	1.16121	2.37698	44.2	2.0606	82.8175	0.245267	0.507446
MAHONEY, 2002;CHRISTIE, 2004	MELWEST-10-069-001	GL	SEIR30	88.922	-41.87	49.381	0.93	8.397	10.009	17.831	12.525	2.256	0.055	0.063	0.113	68.2091	1312.73	1.13564	1302.7	0.788568	5575.35	4.41		4.73	46.5	285.5		78	2.9	1.85	0.728			1.28	0.666	1.4		0.277	0.738	4.77	159.3	0.193	0.87	0.286	27.6	1.79	100		0.444
DEVEY, 1994	POS0158-447-001	WR	MARR23	-18.18	68.23	50.1084	0.929805	10.4967	8.77251	15.0992	12.4816	1.49577	0.0616501	0.0707461	0.192025	60.0692	1401.86	1.35874	1691.11	0.839011	5574.18	14.9		5.7	47	318		105	3.81	2.57	0.8		2.76	1.53	0.84	1.9		0.37	2.33	5.59	107		1	1.25	41	2.12	80		0.54
SMITH, 1998	ABP0016-028-011	WR	MARR95	-37.76	33.8	49.9218	0.929563	8.56055	9.87506	15.5081	12.7997	1.93358	0.0201378	0.0604134	0.161102	67.4945	1320.69	0.959005	1442.28	0.850718	5572.73	27		8.9		499					0.8		2.9			3.3				6.4	178				41	2.1	82
Jenner and O'Neill, 2012	AII0107-6-056-028	GL	SWIR2	5.26	-54.37	48.0278	0.929034	9.80627	8.99853	17.3022	11.8576	2.52647	0.0401658	0.0702901		62.2888	1382.53	1.64058	1500.91	0.796985	5569.56	4.60985	0.203287	4.58509	50.1081	196.629	0.00603906	112.536	3.91286	2.74859	0.759533	16.4	2.7776	1.23224	0.886539	1.44433	3.75496	0.428192	0.957963	4.85518	145.199	0.224359	0.84236	0.493841	42	1.92286	69.2195	0.0624069	0.542215
SMITH, 1998	ABP0016-028-012	WR	MARR95	-37.76	33.8	49.7228	0.927164	8.66006	9.73243	15.5901	12.7976	1.97856	0.0602575	0.0803434	0.160687	66.9191	1326.46	1.02021	1449.21	0.848727	5558.35	30		8.7		489			3.7	2.6	0.76		2.8			3.2				6	207				40	1.8	89
SMITH, 1998	ABP0016-028-006	WR	MARR95	-37.76	33.8	49.7508	0.92694	8.76218	9.84719	15.505	12.7636	1.92813	0.0301215	0.0803239	0.160648	66.9191	1330.2	1.02462	1471.48	0.855579	5557.01	29		8.8		525			3.9	2.7	0.82		3			3.3				6.2	169				41	1.9	88
SMITH, 1998	ABP0016-028-014	WR	MARR95	-37.76	33.8	49.7889	0.926716	8.45619	9.87408	15.3894	12.7708	2.03753	0.130495	0.0702664	0.160609	67.7608	1317.56	0.980056	1420.52	0.857674	5555.66	27		8.6		527			3.8	2.6	0.76		2.7			3.2				6	234				40	1.9	84
Gale et al., this study	KLM0417-R004	GL	BLAU6	-176.144	-19.237	51.0039	0.925659	9.24169	8.2389	15.1045	12.5928	2.34078	0.0425926	0.0645434	0.181245	61.6077	1346.84	1.08363	1500.53	0.801222	5549.33	5.9174	0.2933	4.9183	42.2117	361.42	0.0063		3.859	2.4717	0.7836	12.2647	3.1016	1.3515	0.8474	1.4699	5.086	0.3883	0.8619	5.2732	88.6272	0.264	0.9119	0.6262	41.5398	1.9716	78.0364	0.0649	0.5646
BACH, 1994	SONGMP4-128	GL	EPRR64	-114.513	-22.9892	50.6563	0.925546	8.62351	8.9569	15.5253	12.6392	2.16956	0.0298563	0.0696648	0.159234	65.1518	1320.45	0.943107	1411.99	0.804759	5548.65		0.18	4.4	42	394			4	2.8	0.82	16	3.3		0.86	1.1		0.4		4.9	108					1.8	75
SMITH, 1998	ABP0016-028-008	WR	MARR95	-37.76	33.8	50.1605	0.925071	8.49318	9.74942	15.4332	12.779	1.96412	0.0300607	0.0601215	0.160324	67.3868	1317.3	0.927005	1427.7	0.843407	5545.8	27		8.8		487			3.8	2.7	0.79		2.9			3.2				6	153				41	1.8	88
Bezos et al., 2009	KLM0417-005-001	GL	BLAU7	-175.958	-19.452	50.9796	0.923463	9.80025	8.20718	14.8316	12.4702	2.23177	0.0381943	0.0731891	0.187172	60.1181	1369.56	1.19578	1587.22	0.815225	5536.16	5.5142	0.2738	4.8749	43.9715	404.329	0.0097	94.4075	4.11	2.6706	0.7863	11.85	3.2689	1.4421	0.929	1.3831	5.4726	0.4272	0.8515	5.3948	90.5692	0.2905	0.9136	0.6441	43.4163	2.0653	64.5362	0.0658	0.6037
Gale et al., this study	TRI0138-002-003a	GL	MARR69	-27.35	47.05	49.7444	0.922999	7.94855	9.56169	16.8623	11.9481	2.39362	0.0801263	0.0701018		68.4075	1293.76	0.944503	1250.6	0.770016	5533.38		0.65	8.828	41.8	238		78.2	5.464	3.62727	1.201	16.56	4.53375	2.542	1.237	2.762	6.37	0.512	2.092	9.283	96.2	0.524	1.659			3.372	105.954	0.142	0.836
Jenner and O'Neill, 2012	ALV0827-006	GL	MARR89	-33.63	36.46	50.5887	0.922169	8.97729	8.40541	15.1988	13.0515	2.07075	0.119607	0.119607		62.7607	1337.91	1.01293	1482.64	0.812058	5528.4	40.5672	0.265423	10.5836	45.3172	398.035	0.0405363	92.3823	3.4054	2.10405	0.788734	15.8497	2.71309	1.30596	0.717852	4.83253	4.18011	0.29327	6.92403	7.13398	108.623	0.33518	1.49355	3.78181	41.9	2.13995	91.7134	0.38115	0.484366
SMITH, 1998	ABP0016-028-081	WR	MARR95	-37.76	33.8	49.7983	0.92167	8.75023	9.79451	15.4489	12.6592	1.96909	0.0908717	0.070678	0.16155	66.8305	1329.57	1.03134	1457.25	0.853184	5525.41	34		7.9		528					0.74		2.7			2.9				5.9	223				39	1.7	92
Gale et al., this study	GIL0103-004-004	GL	MARR89	-33.627	36.443	50.6668	0.920886	8.80364	8.45559	15.2867	13.0431	2.02631	0.129394	0.109487		63.3544	1329.49	0.95618	1449.27	0.805016	5520.71	37.497	0.319	10.462	43.07	441.563	0.035	83.546	3.493	2.198	0.775	14.043	2.94	1.345	0.758	4.554	4.827	0.337	7.494	7.041	109.925		1.475	3.394	39.46	2.056	93.276	0.429	0.523
HAASE, 2003	POS0221-703-003	GL	MARR20	-13.74	70.78	49.8	0.92	9.81	8.3	14.61	12.53	1.91	0.18	0.25	0.18	60.3636	1378.08	1.25898	1610.83	0.836039	5515.4	65.4		10.3	52.9		0.06		3.68	2.39	0.75	15.5	2.91	1.41	0.82	4.73		0.37	7.04	6.51		0.45	1.4	4.94		2.19	101		0.55
Kelley, Kingsley, and Schilling, in revision	MELCCTW-007-001	GL	GALA15	-87.09	0.86	50.6975	0.918287	8.72877	8.63795	15.5907	12.7147	2.19985	0.0201821		0.151366	64.0452	1325.63	0.971057	1423.32	0.794056	5505.13	0.7		5.09	42.4	393.6		93.8	3.86	2.49	0.78	13.8	2.98	0.82	0.86	1.01	5.1	0.376	0.593	5.08	107.3	0.232	0.9		41.55	2	64.7	0.0419	0.551
SMITH, 1998	ABP0016-028-001	GL	MARR95	-37.76	33.8	49.4046	0.917675	8.93355	9.87499	15.7471	12.3895	2.00889	0.0991867	0.109105		66.5517	1339.05	1.12105	1467.44	0.849363	5501.46	27		8.5		505			3.7	2.6	0.78		2.9			3.2				5.8	187				40	1.9	85
Jenner and O'Neill, 2012	AII0107-6-056-027	GL	SWIR2	5.26	-54.37	48.0792	0.917594	9.90599	8.92525	17.3711	11.7241	2.51292	0.0401169	0.0802338		61.8581	1386.9	1.66369	1502.19	0.788945	5500.98	4.62638	0.242398	4.60619	50.1089	196.242		112.566	4.03672	2.87392	0.775604	16.4438	2.86276	1.25026	0.924315	1.4362	3.65688	0.444539	0.985686	4.78481	145.948	0.214971	0.824002	0.507258	42.2	1.89317	69.7489	0.0666294	0.545973
Kelley, Kingsley, and Schilling, in revision	EWI9309-045-001b	GL	MARR227	-16.77	-40.587	49.0688	0.915685	8.75873	9.42558	16.6913	12.2622	2.33898	0.0398124	0.0796248	0.15925	65.9522	1332.5	1.19789	1393.99	0.804092	5489.53	9.2		6.98	46.02	370.6	0.011	95.1	3.89	2.57	0.842	15.81	3.12	1.04	0.87	2.23	3.86	0.379	1.019	6.08	165	0.354	1.14	0.58	34.27	2.16	108.1	0.0673	0.57
SMITH, 1998	ABP0016-028-046	WR	MARR95	-37.76	33.8	50.0476	0.915539	8.62263	9.59287	15.6914	12.5029	1.94601	0.100297	0.0702078	0.160475	66.6949	1322.45	0.976744	1408.83	0.825102	5488.66	30		8.8		492			3.8	2.6	0.77		3			3.3				6	191				41	1.9	90
Kelley, Kingsley, and Schilling, in revision	NAUNAZC-019-001	GL	GALA3	-101.37	2.24	49.8624	0.914076	8.50794	9.0805	16.1721	12.998	1.98887	0.0100448	0.0401792	0.210941	65.7667	1319.3	0.981211	1398.63	0.802318	5479.89	3.7		3.47	44.7	364	0.006	86.2	3.37	2.19	0.75	15.16	2.78	0.58	0.75	0.83		0.319	0.355	4.22	179.8	0.204	0.71		35.06	1.82	68.9		0.495
SMITH, 1998	ABP0016-028-017	WR	MARR95	-37.76	33.8	50.0815	0.91342	8.71031	9.67084	15.5071	12.7004	1.9034	0.040486	0.0506074	0.161944	66.6499	1326.77	0.978048	1449.36	0.839925	5475.95	24		8.2		482					0.75		2.8			3				6	208				40	1.9	79
INGLE, 2010	EWI0004-073-001	GL	GALA7	-95.7	2.298	48.1221	0.912909	8.89736	10.0388	16.7434	12.4138	2.25698	0.0714526	0.0605362	0.174662	67.0067	1344.86	1.34875	1440.97	0.847072	5472.89	14		6.58	49.8	443			3.43	2.27	0.8		2.67	1.45	0.827	2.39		0.365	2.5	6	191	0.3138	1.17	1.31	40.7	2.03	111	0.156	0.529
Gale et al., this study	GIL0103-004-005	GL	MARR89	-33.627	36.443	50.6738	0.912205	8.89935	8.53197	15.3127	13.0259	1.90485	0.109674	0.0997033		63.3121	1333.07	0.953788	1463.08	0.805451	5468.67	38.357	0.294	10.428	44.184	464.294	0.038	84.242	3.467	2.183	0.762	14.283	2.923	1.348	0.76	4.579	4.659	0.346	7.485	7.092	119.906	0.301	1.479	3.442	39.095	2.065	95.74	0.426	0.517
Kelley, Kingsley, and Schilling, in revision	TRI0154-018-002	GL	MARR80	-29.31	41.18	50.2408	0.908502	8.87529	9.27917	15.8242	12.207	2.15629	0.0794388	0.0297896	0.0794388	65.3008	1331.6	1.04736	1419.84	0.807555	5446.47	26.84		7.82	47.79	490	0.025	83.61	3.32	2.17	0.756	17.24	2.76	0.65	0.741	2.98	5.19	0.326	3.98	5.53	175.3	0.258	1.11	2.18	40.91	1.88	93.8	0.2491	0.498
SMITH, 1998	ABP0016-028-050	WR	MARR95	-37.76	33.8	50.1136	0.905062	8.69999	9.67983	15.4871	12.5328	1.97579	0.0702021	0.0702021	0.160462	66.6969	1325.67	0.985257	1435.77	0.837647	5425.85	30		8.8		497			3.9	2.7	0.78		3			3.3				5.9	198				41	1.8	87
SMITH, 1998	ABP0016-028-002	WR	MARR95	-37.76	33.8	49.805	0.903277	8.87329	9.76775	15.6187	12.3848	1.98185	0.0900818	0.0800728	0.160146	66.4592	1334.38	1.06568	1451.85	0.841238	5415.15	31		9.1		539					0.81		3			3.5				6.6	253				41	2.2	91
MAHONEY, 2002	MELWEST-10-128-018	GL	SEIR49	110.412	-49.828	50.894	0.9	7.634	9.637	17.258	12.225	2.516	0.059	0.072	0.086	69.4403	1274.39	0.844144	1184.52	0.753362	5395.5	9.47														1.87			1.29	5.51		0.273		0.93		1.95	107
MURTON, 2005	DAR0127-R014	GL	CIRR12	67.66	-20.28	49.57	0.892261	9.31917	9.22003	15.7633	12.2934	2.37936	0.04957	0.0793121	0.158624	64.0398	1355.07	1.27398	1505.64	0.834202	5349.1	3.2		4.5					2.9	1.8	0.8		2.7	1.05	0.61	1.5		0.27	0.6	4.9		0.23	0.8	0.4		1.9	75.7		0.41
Kelley, Kingsley, and Schilling, in revision	END0061-014-001	GL	MARR185	-13.04	-11.05	50.8113	0.891251	8.3317	8.99263	15.2714	12.818	2.04287	0.0600844	0.290408	0.200281	66.0186	1308.51	0.838351	1382.4	0.807749	5343.05	8.11		5.28	43.33	391.8		85.63	3.52	2.28	0.771	14.6	2.67	0.6	0.787	1.65	4.53	0.328	1.5465	5.18	131	0.164	0.99	0.86	37.57	1.91	82.8	0.10565	0.526
BOURDON, 1996	AII0127-2-R108	GL	MARR86	-32.279	37.316	50.55	0.89	8.97	8.82	14.85	12.89	2.19				63.8976	1337.64	1.00111	1517.51	0.837488	5335.55	44																									98
SMITH, 1998	ABP0016-028-087	WR	MARR95	-37.76	33.8	48.85	0.89	8.811	9.96	14.96	12.27	1.95	0.06	0.08	0.16	67.0481	1338.8	1.08548	1502.84	0.876334	5335.55	28		8.8		555			3.9	2.7	0.8		2.9			3.4				6.2	202				41	1.8	89
DEBAILLE, 2006	NAUOCNT-019-002	WR	MARR93	-36.49	34.74	50.1409	0.886914	8.81674	8.99009	15.0977	13.2332	2.14674	0.0907072	0.0907072	0.171336	64.7315	1332.71	1.03655	1491.83	0.849669	5317.05	13.3		5.45					3.44	2.25	0.73		2.8		0.74	1.99		0.31		4.94		0.07	0.9	1.13		1.86	80.6		0.5
Gale et al., this study	KLM0417-R028	GL	BLAU8	-176.149	-20.349	49.86	0.884695	9.30589	9.02563	15.2782	13.0751	2.09815	0.0184978	0.0495941	0.176479	63.5806	1354.96	1.18106	1562.28	0.853296	5303.75	3.5756	0.2106	4.3071	45.7237	390.544	0.003	108.999	3.8524	2.4308	0.7445	14.7423	2.9758	1.3133	0.8587	1.2224	5.1094	0.3859	0.6021	4.7751	104.281	0.2646	0.8362	0.4005	42.5457	1.884	73.0833	0.0501	0.556
Gale et al., this study	KLM0417-R099	GL	BLAU8	-176.172	-20.431	49.834	0.884314	9.03977	9.09943	15.7234	12.8746	2.05639	0.0214156	0.0602625	0.174213	64.4366	1342.84	1.11624	1491.13	0.828688	5301.46	4.4998	0.2992	4.7944	45.3168	396.858	0.0074	107.971	3.8261	2.457	0.7647	12.3703	3.0111	1.3259	0.8504	1.3483	4.9504	0.3881	0.6515	5.1795	116.576	0.3843	0.8936	0.5266	42.6799	1.9127	83.423	0.0501	0.5487
NAURET, 2006	GIMNAUT-PL07-001	GL	CIRR15	65.66	-19.15	49.4085	0.881588	8.79607	8.53853	16.8888	12.0451	2.59524	0.158488	0.0693384	0.178299	63.6006	1333.75	1.23554	1345.29	0.759439	5285.12	31		7.74			0.033		3.95	2.72	0.84		2.97	1.54	0.9	3.04		0.4	3.5	6.09		0.48	1.19	2.76		2.14	103	0.228	0.59
FORNARI, 1988; ALLAN, 1989; DANYUSHEVSKY, 2000	AII0112-25-002-001	GL	EPRR29	-104.36	9.87	48.0071	0.881311	8.40355	9.7492	17.2563	12.9745	2.26879	0.0199373	0.0697807	0.139561	67.619	1324.94	1.24002	1378.7	0.824415	5283.46	1.533		3.68	50	461			3.39	2.17	0.73	15.6	2.73	1.28				0.27	0.4	4.6	241			0.111	31.1	1.72	88.3	0.028	0.42
MEURER, 2001	ALV2883-1250	WR	MARR123	-44.933	22.633	49.8735	0.880192	7.89429	10.4025	16.0951	12.2012	2.12846	0.0399711	0.0749458	0.149892	70.3432	1291.3	0.866043	1298.12	0.826595	5276.75		0.28	4.43	62.8	371		77.6	3.38	2.06	0.75		2.66	1.29	0.73	1.32		0.313	0.81	4.7	185	0.275	0.8		31.4	1.81	80		0.5
BOURDON, 1996	AII0127-2-027-005	GL	MARR82	-29.7378	39.5052	50.95	0.88	9.24	8.59	14.98	11.85	1.16				62.5941	1345.3	0.800628	1476.32	0.763202	5275.6	134
SMITH, 1998	ABP0016-028-009	WR	MARR95	-37.76	33.8	49.09	0.88	8.622	9.65	15.14	12.55	2.02	0.04	0.07	0.16	66.8283	1329.87	1.03423	1471.51	0.859372	5275.6	28		8.9		507			3.8	2.6	0.8		3			3.3				6.1	140				41	1.9	89
SMITH, 1998	ABP0016-028-080	WR	MARR95	-37.76	33.8	48.8	0.88	8.811	9.86	15.02	12.19	1.95	0.05	0.07	0.16	66.8248	1339.31	1.08628	1496.65	0.867707	5275.6	27		8.7		544					0.78		2.9			3.3				6.2	192				40	2	89
SMITH, 1998	ABP0016-028-066	WR	MARR95	-37.76	33.8	49.22	0.88	8.847	9.87	14.91	12.31	1.97	0.04	0.09		66.7568	1338.35	1.04828	1509.54	0.87156	5275.6	27		8.8		522			3.8	2.6	0.79		2.9			3.3				6	172				41	2	92
SMITH, 1998	ABP0016-028-039	WR	MARR95	-37.76	33.8	49.22	0.88	8.919	10.04	15.02	12.34	1.96	0.03	0.06	0.16	66.9557	1340.97	1.08759	1515.21	0.877861	5275.6	27		8.5		519			3.8	2.7	0.79		2.9			3.3				6.1	170				40	1.9	87
SMITH, 1998	ABP0016-028-015	WR	MARR95	-37.76	33.8	48.74	0.88	9.234	10.01	14.93	12.13	1.84	0.05	0.07	0.16	66.1162	1357.63	1.18689	1563.5	0.883783	5275.6	27		8.6		552			3.8	2.6	0.69		2.9			3.3				6	249				41	2	85
SMITH, 1998	ABP0016-028-082	WR	MARR95	-37.76	33.8	49.21	0.88	8.847	9.88	15.18	12.29	1.92	0.04	0.07	0.16	66.7793	1337.51	1.0619	1488.99	0.861216	5275.6	27		8.5		519			3.7	2.6	0.75		2.8			3.2				6.1	361				40	1.9	89
HAASE, 2003	POS0210-1-642-001	GL	MARR20	-13	71.17	49.8	0.88	8.87	8.2	14.59	13.45	1.87	0.24	0.26	0.19	62.463	1340.66	1.02256	1511.56	0.838146	5275.6	83.5		11.8			0.06		3.26	2.13	0.73		2.64	1.24	0.7	5.75		0.32	7.42	6.73			1.53	5.72		2	113	0.43	0.48
Bezos et al., 2009	KLM0417-R013	GL	BLAU8	-176.144	-20.155	51.2605	0.874923	9.1593	8.03114	15.336	12.7992	1.95644	0.0579186	0.0685958	0.169727	61.2146	1341.75	0.976214	1469.06	0.776158	5245.16	9.8432	0.2366	4.5576	41.3692	323.035	0.01	90.4394	3.6428	2.3315	0.7169	14.706	2.8948	1.2718	0.8075	1.3004	5.0564	0.3768	0.6203	4.9369	92.4618	0.4	0.8541	0.8174	41.9302	1.8322	85.0966	0.0537	0.5278
Gale et al., this study	KLM0417-R029	GL	BLAU8	-176.148	-20.34	50.0391	0.873828	9.33519	8.81201	15.3793	13.0056	2.07711	0.0193034	0.0529351	0.176517	62.9509	1354.32	1.1611	1547.7	0.83642	5238.6	5.4708	0.2449	4.6476	45.3736	378.937		105.41	3.8804	2.4971	0.7651	14.955	3.0943	1.334	0.8628	1.3168	5.0194	0.3941	0.6249	5.0498	105.714	0.552	0.8694	0.4848	42.3467	1.9318	73.4634	0.052	0.5586
SMITH, 1998	ABP0016-028-083	WR	MARR95	-37.76	33.8	48.85	0.87	8.919	9.86	14.92	12.34	1.94	0.1	0.07	0.16	66.5542	1344.58	1.12418	1516.89	0.87864	5215.65	24		8.5		497					0.78		2.9			3.1				5.9	192				40	2	83
SMITH, 1998	ABP0016-028-044	WR	MARR95	-37.76	33.8	49.13	0.87	8.901	9.89	15.19	12.33	1.94	0.03	0.07	0.16	66.6667	1340.42	1.08799	1501.38	0.865382	5215.65	26		8.9		512			3.8	2.7	0.76		2.9			3.2				6.1	177				40	1.8	86
DANYUSHEVSKY, 2000	AII0112-25-002	GL	EPRR29	-104.36	9.87	48.0835	0.869939	8.39576	10.3352	16.8487	12.8664	2.16805	0.0169897	0.0599637	0.129921	68.9036	1323.94	1.20248	1400.17	0.855579	5215.28	1.501		3.91					3.42	2.19	0.77	16	2.73	1.31		0.96		0.307	0.42	4.62				0.141	33.5	1.8	90	0.026
HAASE, 2003	POS0221-703-005	GL	MARR20	-13.74	70.78	50.5927	0.865004	8.94173	8.21754	14.9666	13.317	1.76018	0.271571	0.271571	0.191106	62.3241	1337.51	0.974888	1468.89	0.812472	5185.7	78.3		12.8	50		0.09		3.2	2.03	0.72	14.5	2.52	1.35	0.71	6.26		0.3	9.58	7.04		0.48	1.62	6.38		2.03	112		0.47
Gale et al., this study	ALV0518-002-002	GL	MARR88	-33.255	36.818	48.294	0.863775	9.08354	10.6713	16.3439	11.8589	2.20853	0.0790822	0.108738		67.8935	1350.86	1.34153	1468.85	0.871457	5178.33	21.591		6.574			0.01791		3.064	1.97597	0.717		2.43381	1.247	0.672	2.657		0.285	4.055	5.084			1.013	1.735		1.673	97.229	0.251	0.46
Kelley, Kingsley, and Schilling, in revision	CON2806-051-001	GL	MARR156	-31.548	3.919	48.9427	0.860198	9.56995	9.54993	16.3292	11.7764	2.39865	0.0606614	0.0606614	0.161764	64.2376	1367.61	1.42879	1499.65	0.829023	5156.89	7.6		4.88	42.72	251.9		85.6	3.17	2.13	0.75	13.56	2.74	0.84	0.71	1.12		0.321	0.978	4.83	171.5	0.186	0.93		28.24	1.75	106.2	0.0696	0.471
BRYAN, 1979; RYAN, 1987; RYAN, 1993	ALV0530-003	GL	MARR88	-33.268	36.805	49.98	0.86	8.88	10.11	16.37	12.38	1.96	0.1	0.09		67.2058	1330.95	1.07692	1413.71	0.830129	5155.7	21			43	670		100				17					3.55				255						78
SMITH, 1998	ABP0016-028-052	WR	MARR95	-37.76	33.8	48.91	0.86	8.838	9.95	14.95	12.13	1.93	0.03	0.07	0.16	66.9583	1339.93	1.07331	1502.89	0.870409	5155.7	29		8.8		536					0.78		3			3.4				6.4	184				41	1.9	90
SMITH, 1998	ABP0016-028-072	WR	MARR95	-37.76	33.8	49.61	0.86	8.865	9.94	14.66	12.22	1.93	0.02	0.07	0.16	66.8685	1337.23	1.00802	1512.19	0.87388	5155.7	24		8.5		475					0.76		2.8			3				6	167				40	1.9	82
GRIBBLE, 1998; PEARCE, 2005	WASTUNE-7-080-001-3	GL	BMRN10	144.67	19.12	48.839	0.855234	8.62971	8.82411	17.6869	11.3133	2.48156	0.346642	0.138657		64.7955	1326.99	1.25095	1247.81	0.727838	5127.13	28.3		8.62	44.7	232	0.14	89	4.28	2.85	0.994	13.7	3.33	1.39	0.83	3.49		0.38	1.25	7.03	196	0.49	1.24	12.3	34.9	2.38	188	0.097	0.58
ALLAN, 1989; DANYUSHEVSKY, 2000	AII0112-25-003-004	GL	EPRR29	-104.363	9.9	48.4209	0.850692	8.47541	9.84359	17.0701	12.72	2.16503	0.00997013	0.0897312	0.139582	67.6435	1324.28	1.17759	1377.76	0.820061	5099.9	1.846		3.69	48.8	365			3.44	2.22	0.73	15.9	2.74	1.19		0.88		0.35	0.52	7.4	195			0.195	32.3	1.79	79.8	0.04	0.5
YONOVER, 1989; EASON, 2006	ALV1550-002	WR	GALA8	-95.55	2.367	49.8572	0.843852	8.62463	9.57353	15.443	13.0922	2.04922	0.0502814	0.0402251	0.150844	66.6449	1324.64	1.00286	1458.28	0.855042	5058.89	13.6			42	621		79											2		163			1	40		83
DEBAILLE, 2006	CHR0098-003-010	WR	MARR95	-37.667	33.733	49.1069	0.838921	8.06263	8.75874	16.8284	13.7423	1.77771	0.169782	0.109859	0.149807	66.1637	1304.92	0.945778	1325.28	0.786274	5029.33	26		8.24					3.28	2.17	0.65		2.66		0.71	3.55		0.31		5.64		0.29	1.17	3.1		1.86	85.7		0.47
HAASE, 2003	POS0221-701-001	GL	MARR20	-13.75	70.81	50.2674	0.834439	9.58097	8.42482	14.3463	13.8135	1.76941	0.120642	0.271444	0.191016	61.2822	1367.08	1.13857	1654.5	0.87453	5002.46	37.6		6.77	54.7		0.03		3.25	2.09	0.65	14.3	2.45	1.17	0.72	2.98		0.32	4.16	4.97		0.29	0.99	2.88		1.75	81.4		0.47
Arevalo and McDonough (2008)	RSR1979-003-017		CIRR60	57.945	9.825	50.69	0.831	7.78	9.86	16.82	13.22	1.71	0.0285798	0.08		69.5237	1281.25	0.724777	1266.4	0.788761	4981.84	1.93344		2.76543		378.831			2.9487	1.99365	0.646926		2.35156	0.938564	0.667669	0.763405		0.293945	0.377415	3.3716		0.178401	0.545095		28.9486	1.44268	52.7555	0.0228665	0.420428
HAASE, 2003	POS0221-703-004	GL	MARR20	-13.74	70.78	50.5141	0.826777	8.93323	8.28794	14.882	13.4099	1.85521	0.252066	0.272232	0.19157	62.5465	1337.16	0.98869	1480.62	0.824214	4956.53	79.1		12.8	51.5		0.07		3.2	2.05	0.71	14.1	2.57	1.4	0.72	6.37		0.32	9.38	7.09		0.47	1.62	6.24		1.93	111	0.51	0.48
HAASE, 2003	POS0221-701-003	GL	MARR20	-13.75	70.81	50.3091	0.826722	9.56779	8.36804	14.3971	13.8426	1.77443	0.120984	0.231885	0.181476	61.1543	1366.46	1.13434	1649	0.870563	4956.2	36		6.85	54.3		0.03		3.29	2.11	0.66	14.1	2.41	1.15	0.73	2.98		0.33	4.12	4.95		0.29	0.98	2.81		1.76	81	0.22	0.47
HAASE, 2003	POS0221-697-001	GL	MARR20	-13.55	70.86	50.0965	0.823229	9.54744	8.14193	14.6474	13.7037	1.79705	0.240945	0.271063	0.170669	60.5525	1366.37	1.1753	1605.51	0.853068	4935.26	84		17.6			0.08		3.61	2.31	0.9		3.18	1.68	0.77	8.21		0.34	9.3	9.88		0.34	2.31	6.51		2.61	142	0.53	0.54
Gale et al., this study	AII0127-1-004A	GL	MARR95	-37.735	33.842	49.8567	0.820695	8.53044	9.20337	15.3186	13.6962	1.93093	0.0768778	0.0828682	0.167733	66.0095	1322.38	0.961412	1469.77	0.856642	4920.07	18.3		6.564			0.021		3.144	2.10936	0.646		2.27199	1.161	0.707	2.795		0.333	3.628	4.947			0.997	1.651		1.665		0.195	0.483
Kelley, Kingsley, and Schilling, in revision	END0113-026-001	GL	EPRR67	-116.27	-25.28	47.9	0.82	9.51	9.92	17.96	11.36	2.79		0.01	0.15	65.2488	1369.35	1.66566	1420.95	0.802263	4915.9			3.8	56.04	347.5		99.8	3.3	2.31	0.725	14.52	2.51	0.58	0.765	1.11	3.02	0.354	0.399	3.89	271.8	0.248	0.7		35.28	1.61	101.1	0.0315	0.472
Kelley, Kingsley, and Schilling, in revision	ALV0525-005-003	WR	MARR88	-33.27	36.81	48.96	0.82	8.527	9.79	15.75	11.92	1.97	0.11		0.13	67.3907	1325.06	1.03396	1389.41	0.824924	4915.9	35.02		8.52	50.24	510.1	0.032	76.26	3.51	2.4	0.768	16.96	2.76	0.77	0.804	3.46	5.07	0.376	6.01	5.98	215.2	0.477	1.23	2.61	42.85	2.01	88.8	0.386	0.506
[4593][1105]	s KK52		MARR27	-16.73	65.72	48.7637	0.812897	9.77891	9.12497	15.9762	13.1391	1.76061	0.0754545	0.0784727	0.177067	62.6814	1379.65	1.39449	1602.36	0.854067	4873.32	32		8.73		280		116	3.78	2.28	0.78		2.96		0.75	3.98		0.33	5	6.9	159		1.32		40	2	92
Gale et al., this study	AII0127-1-008	GL	MARR93	-36.486	34.708	50.0025	0.810712	8.50049	9.41604	16.2292	12.2875	2.23744	0.0409349	0.0658953	0.147765	66.5984	1316.97	1.00563	1359.01	0.798746	4860.22	9.33		4.839			0.00708		3.338	2.13004	0.749		2.51844	1.219	0.738	1.624		0.321	1.746	4.89		0.189	0.856	1.08		1.772	90.708		0.488
Jenner and O'Neill, 2012	ALV0825-004	GL	MARR89	-33.66	36.44	51.01	0.81	8.56	8.39	15.46	13.46	2.03	0.06	0.1		63.8239	1317.79	0.869897	1421.44	0.798805	4855.95	16.9739	0.22033	5.84831	45.7676	403.436	0.0147155	93.6958	3.41582	2.23489	0.742155	14.7521	2.68372	1.12932	0.748588	2.2394	3.78536	0.327077	2.73374	5.15538	108.914	0.209299	0.925202	1.38195	48.3	1.85642	81.8824	0.162415	0.494973
Gale et al., this study	AII0127-2-055A	GL	MARR95	-37.781	33.723	50.0612	0.809695	9.12657	8.97662	15.6041	12.9651	1.8593	0.0629763	0.0799699	0.15994	63.9045	1345.41	1.0773	1496.78	0.824477	4854.12	13.772		5.128			0.01318		3.484	2.4237	0.672		2.47473	1.175	0.8	1.885		0.361	2.424	4.525		0.128	0.852	1.278		1.676	66.555	0.133	0.502
Kelley, Kingsley, and Schilling, in revision	VEM0033-7-065-001	GL	AFAR10	51.02	13.213	50.0922	0.808905	9.01779	8.01914	16.8472	12.8726	1.76761	0.0499324	0.0898783	0.159784	61.5483	1339.92	1.05696	1396.52	0.736872	4849.39	8		4.58	47.68	290.6		80.5	3.39	2.26	0.66	13.08	2.61	0.51	0.75	1.77	3.88	0.348	1.392	4.38	150.7	0.207	0.83	0.76	37.62	1.67	51.3	0.0964	0.487
PEATE, 2001	DAR0033-041-002-1	GL	BLAU6	-176.173	-19.277	50.1723	0.802866	8.85619	8.7239	15.7968	12.9131	2.09067	0.0801023	0.0801023		63.9394	1333.32	1.03352	1441.47	0.804807	4813.18	15.2		4.69	43.6	426	0.01	89	3.21	2.05	0.68	14.4	2.5	1.16	0.7	1.6	6	0.33	1.33	4.84	104	0.274	0.83	1.38	40.3	1.72	88	0.09	0.47
Gale et al., this study	HAK9303-R002-H	GL	SEIR1	70.172	-25.757	49.9094	0.801752	7.75775	9.18918	16.8676	12.5225	2.36236	0.0700342	0.0700342		68.0728	1286.41	0.882041	1237.42	0.764137	4806.5	9.626	0.39	6.119	41.5	407	0.00803	72.9	3.664	2.26756	0.805	14.58	2.81418	1.478	0.789	1.97	4.96	0.328	1.26	5.912	150.4	0.396	1.038	0.759	33.8	2.037	113.667	0.086	0.53
PEARCE, 1995	DAR0033-021-004-1	WR	BLAU7	-175.927	-19.44	51.28	0.801396	8.42939	8.40095	15.9153	12.8221	1.85014	0.0401113	0.0501392	0.150418	64.2081	1309.92	0.798967	1342.85	0.754387	4804.37	9.6		4.23	40	480		89	3.31	2.15	0.63		2.41	0.94	0.74	1.33	6	0.36	0.76	4.26	112	0.65	0.73	1.03	34	1.63	61	0.05	0.47
Arevalo and McDonough (2008)	RSR1979-003-001		CIRR60	57.945	9.825	50.37	0.796	7.64	9.67	16.71	13.17	1.69	0.0262227	0.09		69.4961	1278.01	0.69981	1253.17	0.781954	4772.02	1.85692		2.77475		383.121			3.00461	2.00548	0.652275		2.33203	0.913921	0.667442	0.781114		0.28653	0.388652	3.41476		0.16722	0.541839		29.0375	1.55809	52.6627	0.0287776	0.427069
Jenner and O'Neill, 2012	VEM0029-001-002	GL	CIRR12	67.62	-20.15	49.0773	0.794199	8.79314	8.98088	17.2683	12.1457	2.36731	0.0602	0.0602		64.7693	1333.53	1.20904	1353.91	0.765622	4761.22	2.19914	0.188033	3.8384	46.9264	328.354	0.00312132	110.195	3.22101	2.15572	0.714679	15.7036	2.31913	1.12909	0.715491	1.07712	4.0618	0.317475	0.466525	4.09583	155.861	0.192789	0.679065	0.227729	34.7	1.6339	76.4829	0.0304277	0.448459
[1133][1105][9551]	s KK31		MARR27	-16.73	65.72	48.964	0.793713	9.5786	9.39844	15.7441	13.1118	1.79161	0.0750674	0.0580521	0.172155	63.8486	1370.58	1.31749	1587.47	0.866181	4758.31	20.1		6.033	46	305		120	2.6	1.579	0.65		1.866	1.01	0.63	2.29		0.231	2.38	4.545	136		0.877	1.78	44	1.54	105		0.373
PEARCE, 1995	DAR0033-041-003-2	WR	BLAU6	-176.173	-19.277	50.8199	0.793522	8.13747	8.44449	16.1533	13.2035	1.89637	0.06033	0.050275	0.150825	65.1314	1299.42	0.789862	1315.07	0.760526	4757.16	13.8		5.06	41	397		93	3.21	1.9	0.71		2.33	1.1	0.78	1.63	6	0.35	1.3	4.99	89	0.78	0.87	1.33	34	1.83	87	0.09	0.47
NIU, 2001	NAUOCNT-009-012	WR	MARR95	-37.691	33.921	49.5621	0.790991	8.70091	9.21155	16.0701	13.1164	1.9925	0.0500628	0.0700879	0.160201	65.5842	1329.82	1.05975	1436.15	0.823958	4741.99	7.38	0.16	4.023	40.31	379.4	0.01	93.24	2.843	1.844	0.671	13.11	2.267	0.989	0.61	1.391	3.32	0.271	1.19	4.059	116.99	0.023	0.775	0.68	39.11	1.517	89.43	0.091	0.414
BOURDON, 1996	AII0127-2-R073	GL	MARR81	-29.574	40.239	50.607	0.790579	9.63705	8.51623	14.7108	13.2497	1.9114	0.0460337	0.0720527	0.190139	61.3997	1365.5	1.13761	1614.35	0.84863	4739.52	10																									62
MURTON, 2002	DAR0080-017-001	WR	MARR46	-32.43	57.887	48.8475	0.7877	9.77051	10.8561	14.6431	12.8557	1.70668	0.0403949	0.0605923	0.171678	66.6666	1379.91	1.34274	1701.19	0.96349	4722.26	5.23		3.09		542.81		85.06	3.4	2.201	0.604	14.15	2.392	1.08	0.78	0.946		0.316	0.75	3.634	250.47	0.02	0.59	0.44	45.1	1.507	60.57		0.49
[1105][1242]	s KK50		MARR27	-16.73	65.72	48.3	0.777405	9.98511	9.50049	15.6894	13.5793	1.64567	0.0403847	0.0504808	0.171635	63.1355	1392.22	1.48775	1690.84	0.90144	4660.54	24		6.29		422		124	3.36	2.09	0.65		2.49		0.67	2.44		0.32		5.5	148		0.98		39	1.58	85
Arevalo and McDonough (2008)	RSR1979-002-044		CIRR60	57.945	9.825	50.19	0.7705	7.71	9.65	16.64	13.05	1.76	0.0304276	0.08		69.2584	1281.68	0.732984	1262.57	0.785185	4619.15	1.97374		2.81481		373.237			2.93996	1.98725	0.637021		2.33299	0.926698	0.659829	0.781268		0.28598	0.396208	3.38788		0.182713	0.558878		28.7846	1.49734	52.5307	0.0305034	0.437089
Jenner and O'Neill, 2012	LYN1973-030-VG1678	GL	MARR21	-14.69	70.57	50.3942	0.763545	9.19262	8.80751	14.9655	13.5897	1.78139	0.0301114	0.0602228		63.2973	1347.77	1.01243	1568.32	0.851685	4577.45	5.29477	0.115191	2.45243	49.2472	162.721	0.0057167	125.684	3.15752	2.00112	0.664718	14.9303	2.19829	0.861314	0.686284	0.628411	3.94001	0.293196	0.399194	3.22313	69.9941	0.130471	0.51031	0.334005	45.2	1.45405	60.7473	0.0243015	0.423024
NIU, 2001	NAUOCNT-019-004	WR	MARR93	-36.492	34.738	48.5657	0.751017	8.65171	9.31261	17.8241	11.9662	2.38323	0.0500678	0.0700949	0.150203	65.9575	1330.02	1.26024	1312.93	0.760179	4502.35		0.18	3.664	49.94	287.8		91.55	2.582	1.793	0.563	14.45	1.977	0.963	0.586	1.152	3.35	0.277	1.22	3.375	174.79		0.648		32.61	1.335	100.9	0.084	0.364
[4593][1105][1242]	s KK58		MARR27	-16.73	65.72	48.749	0.747276	9.37364	9.786	15.9412	13.0648	1.7299	0.0714086	0.0623568	0.167961	65.2679	1362.09	1.27485	1554.33	0.871224	4479.92	38		6.2		407		100	2.93	1.78	0.64		2.29		0.59	2.38		0.27	3	5.3	174		0.99		38	1.54	105
Kelley, Kingsley, and Schilling, in revision	*KOLB-1A	WR	MARR24	-18.67	67.16	49.6867	0.74368	9.21983	9.21983	14.864	13.9045	1.85234	0.0398695	0.0398695	0.169446	64.2857	1353.33	1.12254	1612.35	0.895188	4458.36	8.6		2.3	50.7	467	0.009	94	3.02	2.05	0.68	16.75	2.26	0.355	0.699	0.74		0.336	0.722	2.76	141		0.47	0.56	51.5	1.31	72.2		0.411
Arevalo and McDonough (2008)	RSR1979-003-060-VG5259		CIRR60	57.945	9.825	50.3	0.741	7.63	9.73	16.46	13.03	1.73	0.0273592	0.08		69.6548	1277.95	0.692856	1256.97	0.789347	4442.3	1.92441		3.10124		404.679			2.93988	1.92571	0.654032		2.27314	0.894903	0.642976	0.844956		0.28212	0.390205	3.65668		0.165097	0.590532		28.5612	1.55877	55.6941	0.0315858	0.432669
Bezos et al., 2009	KLM0417-R124	GL	BLAU7	-176.133	-20.096	50.5283	0.7381	8.1238	8.4705	15.7303	12.8151	1.708	0.0878	0.0717	0.137	65.2394	1301.55	0.747382	1316.43	0.760153	4424.91	14.2308	0.1934	3.7342	42.8834	402.68	0.0302	92.4093	2.9405	1.8707	0.5889	13.322	2.3414	1.0218	0.6496	1.1089	4.5238	0.3029	0.4706	4.045	136.429	0.5066	0.7064	1.1601	39.5926	1.4878	96.6267	0.0417	0.4296
MURTON, 2002	DAR0080-108-003	WR	MARR41	-29.619	59.877	50.2948	0.736513	9.55247	9.19128	14.8412	13.0958	1.75552	0.0403569	0.0605353	0.171517	63.396	1362.41	1.11809	1603.97	0.866532	4415.4	4.28		2.91		339.7		134.63	3.36	2.27	0.57	14.11	2.26	1.02	0.77	0.86		0.32	0.67	3.35	112.56	0.14	0.53	0.4	50.28	1.41	59.16	0.05	0.47
Jenner and O'Neill, 2012	LYN1973-030-VG1676	GL	MARR21	-14.69	70.57	50.058	0.729728	9.36917	8.88703	15.1858	13.4674	1.77443	0.0299937	0.0799833		63.0638	1356.19	1.09336	1582.2	0.852597	4374.72	4.12883	0.135762	2.5627	48.6353	319.746	0.00404424	121.896	2.89607	1.89047	0.590474	15.0781	2.15915	0.879469	0.637168	0.619749	3.96478	0.284172	0.329518	3.51558	93.5562	0.155528	0.544973	0.287283	44.9	1.46206	59.5549	0.0187247	0.413722
HAASE, 2003	POS0221-703-002	GL	MARR20	-13.74	70.78	51.0588	0.727987	8.90538	8.50648	14.48	13.2733	1.87482	0.229366	0.249311	0.149586	63.2268	1332.89	0.912455	1482.29	0.835046	4364.28	83.6		12.8	52.9	349	0.08	115	3.18	2.12	0.74	13.8	2.66	1.33	0.71	6.33	3.35	0.3	8.65	7.15	106		1.62	5	39.3	2.01	101	0.48	0.48
Jenner and O'Neill, 2012	ALV0826-002	GL	MARR89	-33.7	36.46	49.2299	0.726756	8.32334	9.26345	16.3438	13.5799	1.95432	0.049786	0.0995719		66.7034	1315.61	0.987703	1399.55	0.825814	4356.9	12.7458	0.187018	4.46895	47.5191	425.183	0.0126585	116.645	2.97297	1.93068	0.649257	15.356	2.32042	0.94429	0.647388	1.69875	3.39377	0.274922	1.85967	4.23043	154.842	0.187376	0.734545	1.11443	40.9	1.58986	75.9577	0.117965	0.414167
DEVEY, 1994	POLARK5-033-001	WR	MARR24	-18.68	67.08	50.1092	0.726653	9.70231	8.9886	14.8217	13.4879	1.64243	0.028867	0.0497707	0.199083	62.513	1370.97	1.16308	1648.6	0.873284	4356.28	17.6		3.6				119	3.11	2.08	0.6		2.12	0.95	0.65	1.27		0.29	0.86	3.73	149		0.63	1.21		1.47	71		0.42
Gale et al., this study	ALV0528-004-001	GL	MARR88	-33.265	36.812	47.04	0.72	8.37	10.84	15.82	12.67	1.96	0.05		0.15	69.9806	1331.72	1.20989	1462.18	0.913341	4316.4	19.61		5.811			0.02564		2.995	2.04422	0.611		2.07204	1.053	0.665	2.351		0.32	3.695	4.386			0.878	1.567		1.473	66.103	0.222	0.424
HAASE, 2003	POS0221-701-004	GL	MARR20	-13.75	70.81	50.9135	0.717372	9.45536	8.65828	14.0485	13.5504	1.79343	0.109599	0.239124	0.149453	62.2394	1357.27	1.0213	1624.53	0.875253	4300.65			6.89	60.1	335	0.03	124	3.1	2.05	0.65	13.6	2.39	1.11	0.68	3.01		0.3	3.89	4.85	117	0.33	1.01		41.4	1.73	71.1	0.21	0.45
HAASE, 2003	POS0221-704-001	GL	MARR20	-13.83	70.74	50.8444	0.697864	9.57071	8.62361	14.4358	13.0899	1.88423	0.0897254	0.239268	0.18942	61.8594	1361.76	1.08276	1598	0.852527	4183.69			5.67	58.3	213	0.03	110	3.31	2.23	0.68	13.7	2.52	1.06	0.74	2.38	2.8	0.32	2.83	4.6	98.9	0.3	0.89		37.4	1.73	58	0.16	0.48
Gale et al., this study	ALV0527-001-001	GL	MARR88	-33.26	36.808	48.4	0.69	9.01	11.04	16.93	12.56	2	0.07	0.06	0.18	68.8041	1346.12	1.33388	1450.5	0.881626	4136.55	18.242		5.79	48	510	0.01509	79	3.113	2.24998	0.593		2.09994	0.931	0.723	2.375		0.354	3.15	4.264	232	0.388	0.86	1.388	34	1.387	61.1	0.195	0.432
[4593][1105]	s KK81		MARR27	-16.73	65.72	49.5632	0.689045	9.36061	8.98059	15.551	13.6409	1.66011	0.0530035	0.0480031	0.174011	63.3286	1358.47	1.15184	1571.6	0.853607	4130.82	37		5.75		426		114	3.02	1.88	0.62		2.34		0.61	2.38		0.29	2	5.2	110		0.93		47	1.51	92
Gale et al., this study	AII0127-1-003	GL	MARR96	-38.205	33.65	48.2245	0.679499	9.00337	9.86273	17.4571	12.0411	2.22836	0.0349742	0.0559588	0.159882	66.3504	1346.47	1.35323	1391.16	0.805099	4073.6	8.98		3.467			0.00882		2.809	1.95323	0.572		1.84605	1.014	0.651	1.285		0.312	1.591	3.391			0.638	0.746		1.276			0.413
Gale et al., this study	KLM0417-R098	GL	BLAU8	-176.167	-20.416	50.9248	0.677571	8.23551	9.05537	15.7561	12.9524	1.79441	0.0772871	0.0626952	0.148637	66.4339	1302.69	0.774308	1336.82	0.789524	4062.04	14.5186	0.2787	4.167	41.7333	399.883	0.0304	91.3067	2.9794	1.8824	0.628	11.6674	2.3862	1.0692	0.6576	1.2115	4.3415	0.2969	0.4282	4.4026	121.537	0.4708	0.7615	1.2683	40.9047	1.5859	95.246	0.0375	0.4348
DEVEY, 1994	POLARK5-037-001	WR	MARR24	-18.75	67.08	49.0656	0.644672	9.13823	10.1737	16.006	12.7524	1.72248	0.030219	0.040292	0.181314	66.7106	1350.07	1.17146	1504.78	0.865455	3864.81	6.9		2.91				105	3.05	2.2	0.57		2.05	1.04	0.7	1		0.35	1.69	3.22	164		0.56	0.58		1.33	55		0.44
DEVEY, 1994	POLARK5-035-001	WR	MARR24	-18.72	67.17	49.0927	0.640687	9.11778	10.211	15.9671	12.6736	1.80193	0.0340365	0.040043	0.170183	66.8415	1348.89	1.17593	1499.86	0.867357	3840.92	8.7		3.47				124	3.21	2.13	0.63		2.04	1.06	0.69	1.19		0.33	0.96	3.51	219		0.61	0.85		1.44	69		0.44
Kelley, Kingsley, and Schilling, in revision	TRI0139-003-002A	WR	MARR25	-18.15	66.81	48.535	0.634256	8.6882	10.5153	15.713	13.8365	1.66199	0.0100337	0.0301012	0.16054	68.539	1335.4	1.09306	1531.2	0.918398	3802.36			1.44	52.8	499		55.1	2.12	1.46	0.46	14.02	1.5	0.48	0.48	0.18	2.97	0.228	0.282	1.66	196.7	0.085	0.27		46.8	0.85	70	0.019	0.288
DEVEY, 1994	POLARK5-022-002B	WR	MARR24	-18.72	67.1	48.9618	0.625774	9.15648	9.76005	16.0683	12.9999	1.95807	0.0232142	0.0403725	0.171583	65.7376	1352.4	1.23459	1512.49	0.861456	3751.52	8.9		2.88				129	3.12	2.14	0.62		2.16	1.05	0.73	1.03		0.34	0.86	3.39	175		0.57	0.79		1.33	70		0.44
DEVEY, 1994	POLARK5-034-001	WR	MARR24	-18.64	67.15	49.1721	0.623322	9.12966	9.75197	16.136	12.8987	1.75938	0.0472518	0.0402143	0.170911	65.785	1349.1	1.16598	1490.58	0.847223	3736.82	8.2		3.28				133	3.09	2.15	0.57		2.03	0.97	0.63	1.11		0.32	0.82	3.23	202		0.58	0.84		1.43	72		0.42
HAASE, 2003	POS0221-694-001	GL	MARR20	-13.42	70.91	50.1713	0.622124	9.30176	8.53915	14.7504	13.8974	1.76603	0.14048	0.230788	0.170582	62.2987	1355.43	1.08241	1585.89	0.863638	3729.63	46.4		9.87			0.05		3.07	2.03	0.66		2.48	1.16	0.67	4.53		0.3	5.19	6.07		0.73	1.36	3.72		1.87	90.7	0.28	0.45
Kelley, Kingsley, and Schilling, in revision	TRI0139-003-001A	WR	MARR25	-18.15	66.81	50.7894	0.619578	8.50221	9.60745	15.0418	13.5658	1.48299		0.0409721	0.149898	67.0401	1315.43	0.7598	1459.25	0.852565	3714.37	1.71		1.97	51.8	443		56.2	2.28	1.53	0.51		1.69	0.11	0.51	0.44		0.246	0.302	2.04	194.2	0.109	0.34		46.4	0.91	60.2	0.022	0.312
Kelley, Kingsley, and Schilling, in revision	TRI0139-003-004	WR	MARR25	-18.15	66.81	50.0244	0.618572	8.49912	9.72228	15.5642	13.6386	1.53394		0.0449689	0.153894	67.3101	1319.06	0.856814	1455.06	0.85408	3708.34			2.17	49	427		115.9	2.59	1.79	0.53	13.94	1.85	0.43	0.6	0.39	3.08	0.268	0.299	2.48	153.8	0.087	0.4		45.5	1.13	69.4	0.021	0.369
DEVEY, 1994	POLARK5-031-004	WR	MARR24	-18.7	67.04	49.7532	0.610407	8.997	8.45564	16.2909	13.8893	1.56104	0.0130087	0.0400267	0.170113	62.8486	1342.75	1.03603	1481.49	0.800502	3659.39	5.7		2.53				126	2.74	1.8	0.51		2.01	0.75	0.57	0.76		0.27	0.51	2.84	162		0.45	0.71		1.32	65		0.38
Jenner and O'Neill, 2012	SALMR79-003-004A	GL	AFAR34	37.27	23.2	49.3494	0.570588	8.74659	9.42636	16.0616	13.6255	1.61423	0.0693808	0.0693808		65.9852	1333.35	1.01099	1465.71	0.842883	3420.68	7.75841	0.097418	2.33135	48.2312	420.996		128.314	2.60042	1.75355	0.430126	14.7096	1.61156	0.548877	0.584309	0.898587	4.28564	0.259916	1.15784	1.99954	176.673	0.104081	0.351984	0.848778	39.8	1.00889	33.1253	0.0653541	0.354938
DEVEY, 1994	POLARK5-031-001	WR	MARR24	-18.7	67.04	49.7287	0.561793	8.45098	8.31655	17.1447	13.9746	1.38442	0.015048	0.0401281	0.160512	63.9167	1318.89	0.893552	1360.69	0.753644	3367.95			2.33				167	2.46	1.75	0.51		1.74	0.75	0.57	0.75		0.25	0.52	2.74	165		0.44			1.12	65		0.37
*Mg#=100´Mg/(Mg+Fe)
‡Melting temperature and pressure are estimated based on the method from Lee et al. (2009).
§SCSS (sulfur content at sulfide saturation) at fO2=0 is calculated based on equations from Fortin et al. (2015).
¶NBO/T (nonbridging O/tetragonal O ratio) is calculated according to equations from Seetharaman et al. (2014).
References:
Lee, C.-T. A., Luffi, P., Plank, T., Dalton, H. & Leeman, W. P. Constraints on the depths and temperatures of basaltic magma generation on Earth and other terrestrial planets using new thermobarometers for mafic magmas. Earth and Planetary Science Letters 279, 20–33 (2009).
Fortin, M.-A., Riddle, J., Desjardins-Langlais, Y. & Baker, D. R. The effect of water on the sulfur concentration at sulfide saturation (SCSS) in natural melts. Geochimica et Cosmochimica Acta 160, 100–116 (2015).
Seetharaman, S., McLean, A., Guthrie, R. I. L. & Sridhar, S. Treatise on process metallurgy. (Elsevier, 2014).
[truncated: 17 more columns]
