# Supplementary material for: Latitude-dependent oxygen fugacity in arc magmas
Source: Nat Commun. 2024 Jul 18;15:6050. doi: 10.1038/s41467-024-50337-6 (PMC11258285; doi:10.1038/s41467-024-50337-6)
Supplement: Supplementary file 8 — Supplementary Data 5 [file 41467_2024_50337_MOESM8_ESM.xlsx]

## Sheet: Sheet1
Supplementary Table 5. Summarized average values of slab's physical properties and geochemical data of primary basaltic rocks in different arc segments.
Location	Moho depth (km)	References	Slab Dip (°)	std	Slab Depth (km)	std	Latittude (°)	std	Longitude (°)	std	Sc (ppm)	se	Ti (ppm)	se	V (ppm)	se	V/Sc	se	Cu	Cu se	Zr (ppm)	se	Cu/Zr	se	Dy/Yb	se	143Nd/144Nd	se	87Sr/86Sr	se
Scotia Arc-South Shetland	32	Parera-Portell et al., 2023					-62.28	0.21	-59.068	0.898314	33.83	1.06	5299.58	177.33	256.32	5.26	7.75	0.27	78.2851	5.51746	73.99	3.18	1.34	0.15	1.92536	0.0485883	0.51294	1e-05	0.70372	7e-05
Kamchatka Arc	35	Tuner and Langmuir, 2015	44.9482	7.45337	-121.205	26.2753	55.85	1.48	160.367	1.8152	33.58	0.31	5813.8	63.66	252.18	2.24	7.72	0.06	95.531	4.03624	88.36	2.01	1.2	0.07	1.82067	0.00966437	0.51308	1e-05	0.70343	1e-05
Aleutian Arc	38.5	Janiszewski et al., 2013	45.2456	9.83093	-77.1063	20.2514	53.55	2.16	-173.849	13.8951	31.75	0.93	4839.12	104.76	226.14	6.62	7.52	0.06	71.119	3.08371	75.51	3.08	1.1	0.22	1.8319	0.0170616	0.51298	5e-05	0.70319	8e-05
Andean Arc (sourthern segment 1)	38	Rodriguez and Russo, 2019	32.3748	1.14329	-101.113	16.7284	-45.52	2.93	-72.2904	0.825166	30	1.14018	6844.29	447.93	215	10.49	7.34	0.34	50.75	1.37689	108.333	10.831	0.516468	0.0705468	1.83763	0.0355739	0.512794		0.704167
Cascades	42.3	Tuner and Langmuir, 2015	51.2054	11.7072	-142.292	57.9708	42.57	2.15	-121.623	0.543462	30.84	0.38	6064.1	69.97	201.67	1.82	6.87	0.09	69.4403	2.30626	104.36	1.96	0.79	0.05	1.90458	0.0237834	0.51289	1e-05	0.70371	5e-05
Kurile Arc	22.8	Zellmer, 2008; Tuner and Langmuir, 2015	30.7786	3.6278	-155.023	49.2046	44.33	1.23	143.199	2.924	33.86	1.12	6068.78	94.55	244.77	5.76	7.15	0.16	60.5	20.3981	88.15	3.19	0.83	0.41	1.65919	0.0197628	0.51295	1e-05	0.70335	4e-05
Andean Arc (southern segment 2)	38.21	Tuner and Langmuir, 2015	28.5535	4.22736	-118.766	26.2712	-38.6288	1.96689	-71.3946	0.889058	30.1488	0.385389	5252.74	104.06	211.55	2.12737	7.14456	0.0730493	76.5193	2.06649	74.6997	2.60627	1.23113	0.0563672	1.74816	0.0390211	0.512852	1.0827e-05	0.703923	3.69293e-05
New Zealand	35	Thomson and Evison, 1962	43.7533	16.6962	-101.727	62.2508	-38.5	0.95	175.693	0.542019	33.43	0.74	5882.55	251.2	231.66	4.57	7	0.17	56.0135	3.96938	94.19	4.27	0.73	0.08	1.73764	0.0158023	0.51286	1e-05	0.70449	7e-05
Honshu Arc	32	Tuner and Langmuir, 2015	27.2828	4.13552	-192.149	101.738	37.82	3.17	137.214	3.63089	33.21	0.67	6254.49	70.75	230.56	4.03	7.23	0.1	64.1557	2.84268	92.25	1.82	0.99	0.07	1.78826	0.0246535	0.51282	1e-05	0.70435	5e-05
Izu-Bonin Arc	21	Tuner and Langmuir, 2015	45.3396	6.13084	-111.009	43.1217	29.27	3.09	140.851	1.30943	42.62	2.16	4569.7	135.55	278.16	3.98	6.77	0.19	87.69	3.49466	42.75	1.78	2.84	0.3	1.63821	0.0154694	0.51305	1e-05	0.70341	6e-05
Kermadec Arc	17.5	Tuner and Langmuir, 2015	47.3205	5.31854	-92.7754	21.4537	-31.35	2.41	-179.169	1.56846	43.74	1.02	4033.19	204.28	285.98	6.53	6.57	0.11	87.0717	4.77736	34.72	3.88	3.48	0.4	1.67247	0.0162918	0.51303	1e-05	0.70348	5e-05
Mexican Volcanic Belts	45	Tuner and Langmuir, 2015	43.8668	16.1378	-136.387	77.4069	19.6615	1.15034	-100.874	2.26237	26.1741	0.654046	6072.64	140.11	185.733	2.98694	6.91207	0.0980882	47.6897	2.15017	112.322	3.61848	0.470642	0.0266536	1.92503	0.0377167	0.51279	3.81e-05	0.703812	5.32e-05
Greater Antilles	25	Brown and Gurrola, 2002	38.2372	9.96011	-77.3086	42.7476	19.04	1.13	-70.2427	4.10835	39.7	0.9	5293.97	189.35	266.4	5.93	6.86	0.18	104.1	12.0169	52.66	4.3	2.19	0.56	1.72592	0.0316406	0.5131	5e-05	0.70384	0.00035
Mariana Arc	18	Calvert et al., 2008	56.1436	7.30831	-135.665	51.3826	17.19	2.26	145.316	0.797217	37.46	0.67	3604.38	140.43	254.25	3.81	6.87	0.16	84.382	3.32482	36.24	2.17	2.76	0.19	1.634	0.0129054	0.513	1e-05	0.70331	3e-05
New Hebrides Arc - Vanuatu	25	Dimalanta et al., 2002	60.3696	10.4277	-172.326	83.2259	-15.8	2.01	168.287	0.788541	41.92	1.5	4394.45	190.74	273.51	8.44	6.71	0.17	108	8.51329	42.62	2.77	2.75	0.49	1.72872	0.0282231	0.51299	1e-05	0.70384	0.0001
Lesser Antilles	30	Melekhova et al., 2019	31.1805	4.3884	-74.8522	7.59659	13.17	1.84	-62.2439	2.19153	38.62	1.07	5288.09	86.74	262.61	4.45	6.87	0.09	80.9144	4.7504	64.36	2.02	1.23	0.08	1.8225	0.0225151	0.51291	2e-05	0.70463	0.00013
Central American Volcanic Arc	30.775	Tuner and Langmuir, 2015	64.7116	6.77972	-129.126	26.9211	11.64	1.34	-85.5495	2.45541	41.6	1.27	4716.25	124.73	282.63	3.88	6.84	0.17	105.988	7.22639	42.98	2.04	2.55	0.31	1.82982	0.0441004	0.51304	1e-05	0.70374	0.0001
Solomon Island Arc	25	Clift and Vannucchi, 2004	54.6686	11.5481	-49.3519	18.4346	-8.82	1.14	159.116	3.28053	40.35	1.89	3676.05	134.48	260.57	9.46	6.6	0.25	104.782	12.6329	41.02	3.38	2.68	0.3	1.76417	0.0405674	0.513	1e-05	0.70368	6e-05
Sunda Arc	27.8	Zellmer, 2008	40.3186	4.43434	-104.557	21.4541	-7.01	1.87	109.206	3.92597	41.11	1.87	5016.65	125.57	269.37	16.09	6.66	0.27	79.2571	17.0963	49.51	2.81	2.56	0.69	1.746	0.0668855	0.51287	1e-05	0.70467	0.00018
Bismarck Arc - New Britain Arc	20	Tuner and Langmuir, 2015	56.9954	16.5575	-162.528	53.9977	-4.63578	1.7923	146.748	4.01038	38.6135	1.20907	3732.79	313.544	253.948	5.142	6.68543	0.144321	92.5571	14.7891	45.728	6.0974	2.57444	0.501173	1.63787	0.0613184	0.512999	1.69208e-05	0.703529	0.00011002
Andean Arc (northern segment)	42.2	Zellmer, 2008; Tuner and Langmuir, 2015	27.256	11.2545	-150.067	64.5952	2.87	3.56	-77.5459	1.51503	39.51	2.43	5398.83	248.37	243.17	9.86	6.59	0.42	65.3765	11.3218	69.65	8.62	1.34	0.33	1.84172	0.0786318	0.51304	1e-05	0.70381	0.00016
Sulawesi Arc	33	Linang (2023)	26.9157	3.20463	-49.5895	7.26323	0.410222	2.37293	122.081	2.38541	38.2	1.82757	5661.94	384.53	257.286	12.413	6.72033	0.286966	93.75	14.3433	52.5	9.18967			1.96054	0.0310898			0.70371
Luzon Arc	27.8	Zellmer, 2008	52.9069	6.49096	-89.4297	34.6931	14.76	2.18	121.293	1.30029	35.11	2.32	5241.72	124.5	231.56	17.99	7.05	0.96	81.28	6.48542	94.36	4.69	1.02	0.12	1.83666	0.0445604	0.51285	4e-05	0.70432	0.0001
Scotia Arc-South Sandwich	15	Tuner and Langmuir, 2015					-57.29	0.84	-26.8556	0.521471	41.46	1.59	3222.07	195.25	251.14	13.8	6.02	0.34	66.3429	17.1069	29.81	3.74	2.12	0.61	1.51255	0.0203595	0.51303	2e-05	0.70394	8e-05
*std: standard deviation; se: standard error.
References:
Brown, S. & Gurrola, H. Receiver Function Analysis of the Crust and Upper Mantle Beneath Puerto Rico. 2002, S51A-1035 (2002).
Calvert, A. J., Klemperer, S. L., Takahashi, N. & Kerr, B. C. Three-dimensional crustal structure of the Mariana island arc from seismic tomography. Journal of Geophysical Research: Solid Earth 113, (2008).
Clift, P. & Vannucchi, P. Controls on tectonic accretion versus erosion in subduction zones: Implications for the origin and recycling of the continental crust. Reviews of Geophysics 42, (2004).
Dimalanta, C., Taira, A., Yumul, G. P., Tokuyama, H. & Mochizuki, K. New rates of western Pacific island arc magmatism from seismic and gravity data. Earth and Planetary Science Letters 202, 105–115 (2002).
Janik, T., Grad, M., Guterch, A. & Środa, P. The deep seismic structure of the Earth’s crust along the Antarctic Peninsula—A summary of the results from Polish geodynamical expeditions. Global and Planetary Change 123, 213–222 (2014).
Janiszewski, H. A., Abers, G. A., Shillington, D. J. & Calkins, J. A. Crustal structure along the Aleutian island arc: New insights from receiver functions constrained by active-source data. Geochemistry, Geophysics, Geosystems 14, 2977–2992 (2013).
Melekhova, E. et al. Lateral variation in crustal structure along the Lesser Antilles arc from petrology of crustal xenoliths and seismic receiver functions. Earth and Planetary Science Letters 516, 12–24 (2019).
Parera-Portell, J. A., Mancilla, F. D. L., Almendros, J., Morales, J. & Stich, D. Slab Tearing Underneath the Bransfield Strait, Antarctica. Geophysical Research Letters 50, e2023GL103813 (2023).
Rodriguez, E. E. & Russo, R. M. Southern Chile crustal structure from teleseismic receiver functions: Responses to ridge subduction and terrane assembly of Patagonia. Geosphere 16, 378–391 (2019).
Thomson, A. A. & Evison, F. F. Thickness of the earth’s crust in New Zealand. New Zealand Journal of Geology and Geophysics 5, 29–45 (1962).
Turner, S. J. & Langmuir, C. H. The global chemical systematics of arc front stratovolcanoes: Evaluating the role of crustal processes. Earth and Planetary Science Letters 422, 182–193 (2015).
Zellmer, G. F. Some first-order observations on magma transfer from mantle wedge to upper crust at volcanic arcs. Geological Society, London, Special Publications 304, 15–31 (2008).
