# Supplementary material for: Latitude-dependent oxygen fugacity in arc magmas
Source: Nat Commun. 2024 Jul 18;15:6050. doi: 10.1038/s41467-024-50337-6 (PMC11258285; doi:10.1038/s41467-024-50337-6)
Supplement: Supplementary file 9 — Supplementary Data 6 [file 41467_2024_50337_MOESM9_ESM.xlsx]

## Sheet: Sheet1
Supplementary Table 6. Parameters used for Sr-Nd isotope mixing modeling.
Sources	Sr (ppm)	87Sr/86Sr	Nd (ppm)	143Nd/144Nd	References
Depleted mantle	9.8	0.7026	0.713	0.5131	Salters and Stracke (2004)
Average subducted sediments	300	0.71	29	0.5124	Plank and Langmuir (1998)
Subducted sediments1	405	0.71682	25.4	0.51216	Plank and Langmuir (1998)
Subducted sediments2	339	0.70493	17.7	0.51275	Plank and Langmuir (1998)
Subducted sediments3	150	0.71083	22.6	0.51202	Plank and Langmuir (1998)
20% partial sediment melt	777.563	0.71	8.43699	0.5124	Plank and Langmuir (1998)
Note:
The Sr and Nd contents of 20% partial sediment melt are calculated based on equation of CL = Co/[F+D(1-F)].
CL is the Sr and Nd contents of the sediment melt.
Co is the Sr and Nd contents of average subducted sediments.
DSr and DNd are 0.25 and 2.55, respectively, according to Turner and Langmuir (2022).
References:
Salters, V. J. M. & Stracke, A. Composition of the depleted mantle. Geochemistry, Geophysics, Geosystems 5, (2004).
Plank, T. & Langmuir, C. H. The chemical composition of subducting sediment and its consequences for the crust and mantle. Chemical Geology 145, 325–394 (1998).
Turner, S. J., & Langmuir, C. H. Sediment and ocean crust both melt at subduction zones. Earth and Planetary Science Letters 584, 117424 (2022).
