# Supplementary material for: Latitude-dependent oxygen fugacity in arc magmas
Source: Nat Commun. 2024 Jul 18;15:6050. doi: 10.1038/s41467-024-50337-6 (PMC11258285; doi:10.1038/s41467-024-50337-6)
Supplement: Supplementary file 10 — Supplementary Data 7 [file 41467_2024_50337_MOESM10_ESM.xlsx]

## Sheet: Sheet1
Supplementary Table 7. Model for V, Sc and Ti variations during sub-arc mantle melting.
	mantle melting pressure (GPa)						Mineral modes and melting reaction of the mantle								Initial geochemical composition of sub-arc mantle							Parameters for calculating D V (Wang et al., 2019)
	Average	1.15						Ol	Opx	Cpx	Sp	Reference			Co (ppm)	V	Ti	Sc	References			Mg# Ol	Wo# Opx	Al Cpx	Cr# Sp	NBO/Tot	Mg# Cpx	Mg# Opx	AlT Opx	Wo Cpx
	‒1s	0.91					spinel lherzolite mineral assemblage	57	28	13	2	Workman and Hart (2005)			Average	79.31	827.189	16.268	Workman and Hart (2005)			89.5925	4.37517	0.171924	10.654	1.12	90.8	89.7	0.147949	43.89
	+1s	1.39					melting reaction for harzburgite	-0.193182	-0.806818			Parman and Grove (2004)			uncertainty (+)	84.8617	926.452	18.3828	Salters and Stracke (2004)
							melting reaction for spinel lherzolite	0.25	-0.51	-0.62	-0.12	Gaetani and Grove (1998)			uncertainty (-)	73.7583	727.926	14.1532	Plank and Langmuir (1998)
									Dmineral/melt for V (FMQ)	0				Dmineral/melt for V (FMQ+0.8)	0.8				Dmineral/melt for V (FMQ+1.0)	1				Dmineral/melt for V (FMQ+1.2)	1.2				Dmineral/melt for V (FMQ+1.4)	1.4				Dmineral/melt for Sc					Dmineral/melt for Ti					Mineral assemblages				Bulk D
Pressure (GPa)	Temperature (℃)	F	Ol	Opx	Cpx	Sp	Mass of residue		V Sp	V Cpx	V Opx	V Ol		V Sp	V Cpx	V Opx	V Ol		V Sp	V Cpx	V Opx	V Ol		V Sp	V Cpx	V Opx	V Ol		V Sp	V Cpx	V Opx	V Ol		Sc Sp	Sc Cpx	Sc Opx	Sc Ol		Ti Sp	Ti Cpx	Ti Opx	Ti Ol		Ol	Opx	Cpx	Sp	D Ti	D Sc
1.15	1200.43	0.1	57.025	27.949	12.938	1.988	99.9		4.10386	1.84272	1.29307	0.0502219		2.91335	1.12683	0.897885	0.0312243		2.67419	0.99646	0.819635	0.0277264		2.45466	0.88117	0.748205	0.0246203		2.25316	0.779219	0.683	0.0218621		0.06	2.36566	0.698924	0.12		0.3	0.358672	0.162534	0.008		57.0821	27.977	12.951	1.98999	0.10246	0.571605
1.15	1200.87	0.2	57.05	27.898	12.876	1.976	99.8		4.09923	1.83787	1.28951	0.0501786		2.91006	1.12387	0.895413	0.0311974		2.67118	0.993838	0.817379	0.0277025		2.4519	0.878851	0.746145	0.024599		2.25062	0.777169	0.68112	0.0218433		0.06	2.3633	0.698951	0.12		0.3	0.358525	0.162254	0.008		57.1643	27.9539	12.9018	1.97996	0.102125	0.570078
1.15	1201.3	0.3	57.075	27.847	12.814	1.964	99.7		4.09461	1.83304	1.28596	0.0501353		2.90678	1.12091	0.892949	0.0311705		2.66817	0.991224	0.81513	0.0276786		2.44914	0.87654	0.744092	0.0245779		2.24809	0.775125	0.679246	0.0218245		0.06	2.36096	0.698978	0.12		0.3	0.35838	0.161974	0.008		57.2467	27.9308	12.8526	1.96991	0.101791	0.568552
1.15	1201.74	0.4	57.1	27.796	12.752	1.952	99.6		4.09	1.82822	1.28242	0.0500922		2.90351	1.11797	0.890494	0.0311437		2.66516	0.988619	0.812889	0.0276548		2.44638	0.874236	0.742046	0.0245567		2.24555	0.773088	0.677378	0.0218057		0.06	2.35861	0.699005	0.12		0.3	0.358234	0.161695	0.008		57.3293	27.9076	12.8032	1.95984	0.101456	0.567025
1.15	1202.17	0.5	57.125	27.745	12.69	1.94	99.5		4.0854	1.82342	1.2789	0.0500491		2.90024	1.11503	0.888047	0.0311169		2.66216	0.986022	0.810655	0.027631		2.44363	0.87194	0.740007	0.0245356		2.24303	0.771057	0.675517	0.0217869		0.06	2.35627	0.699032	0.12		0.3	0.358088	0.161416	0.008		57.4121	27.8844	12.7538	1.94975	0.101122	0.565499
1.15	1202.61	0.6	57.15	27.694	12.628	1.928	99.4		4.08081	1.81863	1.27539	0.050006		2.89698	1.1121	0.885608	0.0310901		2.65917	0.983433	0.808428	0.0276072		2.44088	0.86965	0.737975	0.0245145		2.24051	0.769033	0.673661	0.0217682		0.06	2.35393	0.699059	0.12		0.3	0.357943	0.161138	0.008		57.495	27.8612	12.7042	1.93964	0.100787	0.563973
1.15	1203.04	0.7	57.175	27.643	12.566	1.916	99.3		4.07622	1.81386	1.27189	0.0499631		2.89373	1.10918	0.883177	0.0310634		2.65618	0.980853	0.80621	0.0275835		2.43813	0.867369	0.735949	0.0244934		2.23799	0.767015	0.671812	0.0217495		0.06	2.3516	0.699086	0.12		0.3	0.357797	0.160861	0.008		57.578	27.8379	12.6546	1.92951	0.100453	0.562447
1.15	1203.48	0.8	57.2	27.592	12.504	1.904	99.2		4.07164	1.8091	1.2684	0.0499201		2.89048	1.10628	0.880755	0.0310367		2.6532	0.978281	0.803998	0.0275598		2.4354	0.865094	0.733931	0.0244724		2.23547	0.765004	0.669969	0.0217308		0.06	2.34927	0.699113	0.12		0.3	0.357652	0.160585	0.008		57.6613	27.8145	12.6048	1.91935	0.100118	0.560922
1.15	1203.91	0.9	57.225	27.541	12.442	1.892	99.1		4.06707	1.80436	1.26492	0.0498773		2.88723	1.10338	0.87834	0.0310101		2.65022	0.975717	0.801794	0.0275361		2.43266	0.862827	0.731918	0.0244514		2.23296	0.762999	0.668133	0.0217122		0.06	2.34695	0.69914	0.12		0.3	0.357507	0.160309	0.008		57.7447	27.7911	12.555	1.90918	0.0997837	0.559397
1.15	1204.35	1	57.25	27.49	12.38	1.88	99		4.06251	1.79964	1.26145	0.0498345		2.88399	1.10049	0.875933	0.0309835		2.64725	0.973161	0.799597	0.0275125		2.42993	0.860567	0.729913	0.0244304		2.23046	0.761	0.666302	0.0216935		0.06	2.34462	0.699167	0.12		0.3	0.357362	0.160034	0.008		57.8283	27.7677	12.5051	1.89899	0.0994492	0.557872
1.15	1204.78	1.1	57.275	27.439	12.318	1.868	98.9		4.05795	1.79493	1.258	0.0497918		2.88076	1.09761	0.873535	0.0309569		2.64428	0.970614	0.797407	0.0274889		2.42721	0.858315	0.727914	0.0244094		2.22796	0.759008	0.664477	0.0216749		0.06	2.34231	0.699194	0.12		0.3	0.357217	0.159759	0.008		57.912	27.7442	12.455	1.88878	0.0991146	0.556348
1.15	1205.22	1.2	57.3	27.388	12.256	1.856	98.8		4.05341	1.79023	1.25456	0.0497491		2.87753	1.09473	0.871144	0.0309304		2.64131	0.968075	0.795225	0.0274654		2.42449	0.856069	0.725922	0.0243885		2.22546	0.757023	0.662659	0.0216564		0.06	2.33999	0.699221	0.12		0.3	0.357073	0.159485	0.008		57.996	27.7206	12.4049	1.87854	0.09878	0.554823
1.15	1205.65	1.3	57.325	27.337	12.194	1.844	98.7		4.04887	1.78555	1.25112	0.0497065		2.87431	1.09187	0.868762	0.0309039		2.63836	0.965544	0.79305	0.0274418		2.42177	0.853831	0.723937	0.0243676		2.22297	0.755043	0.660846	0.0216378		0.06	2.33768	0.699248	0.12		0.3	0.356928	0.159212	0.008		58.08	27.6971	12.3546	1.86829	0.0984453	0.553299
1.15	1206.09	1.4	57.35	27.286	12.132	1.832	98.6		4.04433	1.78088	1.2477	0.049664		2.87109	1.08902	0.866387	0.0308774		2.6354	0.963021	0.790882	0.0274183		2.41906	0.8516	0.721958	0.0243468		2.22048	0.75307	0.65904	0.0216193		0.06	2.33537	0.699275	0.12		0.3	0.356784	0.158939	0.008		58.1643	27.6734	12.3043	1.85801	0.0981107	0.551775
1.15	1206.52	1.5	57.375	27.235	12.07	1.82	98.5		4.03981	1.77623	1.2443	0.0496215		2.86788	1.08618	0.86402	0.030851		2.63246	0.960506	0.788722	0.0273949		2.41636	0.849376	0.719985	0.0243259		2.218	0.751104	0.65724	0.0216008		0.06	2.33307	0.699301	0.12		0.3	0.35664	0.158667	0.008		58.2487	27.6497	12.2538	1.84772	0.097776	0.550252
1.15	1206.96	1.6	57.4	27.184	12.008	1.808	98.4		4.03529	1.7716	1.2409	0.0495791		2.86467	1.08334	0.861661	0.0308247		2.62951	0.957999	0.786568	0.0273715		2.41366	0.847159	0.71802	0.0243051		2.21552	0.749143	0.655445	0.0215823		0.06	2.33077	0.699328	0.12		0.3	0.356496	0.158395	0.008		58.3333	27.626	12.2033	1.8374	0.0974413	0.548728
1.15	1207.39	1.7	57.425	27.133	11.946	1.796	98.3		4.03079	1.76698	1.23751	0.0495367		2.86147	1.08051	0.85931	0.0307983		2.62657	0.9555	0.784422	0.0273481		2.41096	0.844949	0.71606	0.0242844		2.21304	0.747189	0.653657	0.0215639		0.06	2.32847	0.699355	0.12		0.3	0.356352	0.158124	0.008		58.4181	27.6022	12.1526	1.82706	0.0971065	0.547205
1.15	1207.83	1.8	57.45	27.082	11.884	1.784	98.2		4.02629	1.76237	1.23414	0.0494944		2.85828	1.0777	0.856966	0.030772		2.62364	0.953009	0.782283	0.0273247		2.40827	0.842747	0.714108	0.0242636		2.21057	0.745242	0.651874	0.0215455		0.06	2.32618	0.699382	0.12		0.3	0.356208	0.157854	0.008		58.5031	27.5784	12.1018	1.8167	0.0967717	0.545682
1.15	1208.26	1.9	57.475	27.031	11.822	1.772	98.1		4.02179	1.75778	1.23077	0.0494522		2.85509	1.07489	0.854631	0.0307458		2.62071	0.950526	0.780151	0.0273014		2.40558	0.840551	0.712161	0.0242429		2.2081	0.7433	0.650097	0.0215271		0.06	2.32389	0.699409	0.12		0.3	0.356064	0.157585	0.008		58.5882	27.5545	12.051	1.80632	0.0964369	0.544159
1.15	1208.7	2	57.5	26.98	11.76	1.76	98		4.01731	1.7532	1.22742	0.04941		2.8519	1.07209	0.852303	0.0307195		2.61779	0.948051	0.778026	0.0272781		2.4029	0.838362	0.710222	0.0242223		2.20564	0.741365	0.648327	0.0215087		0.06	2.3216	0.699436	0.12		0.3	0.355921	0.157316	0.008		58.6735	27.5306	12	1.79592	0.0961021	0.542637
1.15	1209.13	2.1	57.525	26.929	11.698	1.748	97.9		4.01283	1.74864	1.22408	0.0493679		2.84873	1.0693	0.849982	0.0306933		2.61487	0.945584	0.775908	0.0272549		2.40022	0.836181	0.708288	0.0242016		2.20318	0.739435	0.646562	0.0214904		0.06	2.31932	0.699462	0.12		0.3	0.355778	0.157047	0.008		58.7589	27.5066	11.9489	1.7855	0.0957672	0.541114
1.15	1209.57	2.2	57.55	26.878	11.636	1.736	97.8		4.00836	1.74409	1.22075	0.0493258		2.84555	1.06652	0.84767	0.0306672		2.61196	0.943125	0.773796	0.0272317		2.39754	0.834006	0.706361	0.024181		2.20073	0.737512	0.644803	0.0214721		0.06	2.31704	0.699489	0.12		0.3	0.355634	0.156779	0.008		58.8446	27.4826	11.8978	1.77505	0.0954323	0.539592
1.15	1210	2.3	57.575	26.827	11.574	1.724	97.7		4.0039	1.73956	1.21743	0.0492838		2.84238	1.06375	0.845365	0.0306411		2.60905	0.940673	0.771692	0.0272085		2.39487	0.831838	0.70444	0.0241604		2.19828	0.735595	0.643049	0.0214538		0.06	2.31477	0.699516	0.12		0.3	0.355491	0.156512	0.008		58.9304	27.4585	11.8465	1.76459	0.0950974	0.53807
1.15	1210.43	2.4	57.6	26.776	11.512	1.712	97.6		3.99944	1.73504	1.21412	0.0492419		2.83922	1.06099	0.843068	0.030615		2.60615	0.93823	0.769595	0.0271853		2.39221	0.829677	0.702526	0.0241398		2.19583	0.733684	0.641302	0.0214355		0.06	2.31249	0.699542	0.12		0.3	0.355349	0.156246	0.008		59.0164	27.4344	11.7951	1.7541	0.0947624	0.536548
1.15	1210.87	2.5	57.625	26.725	11.45	1.7	97.5		3.99499	1.73053	1.21082	0.0492		2.83606	1.05823	0.840778	0.030589		2.60325	0.935794	0.767505	0.0271622		2.38955	0.827523	0.700618	0.0241193		2.19339	0.73178	0.63956	0.0214173		0.06	2.31023	0.699569	0.12		0.3	0.355206	0.15598	0.008		59.1026	27.4103	11.7436	1.74359	0.0944274	0.535026
1.15	1211.3	2.6	57.65	26.674	11.388	1.688	97.4		3.99055	1.72604	1.20754	0.0491582		2.83291	1.05548	0.838496	0.030563		2.60036	0.933366	0.765422	0.0271391		2.38689	0.825376	0.698716	0.0240988		2.19095	0.729881	0.637824	0.0213991		0.06	2.30796	0.699596	0.12		0.3	0.355063	0.155715	0.008		59.1889	27.386	11.692	1.73306	0.0940923	0.533505
1.15	1211.74	2.7	57.675	26.623	11.326	1.676	97.3		3.98612	1.72157	1.20426	0.0491164		2.82976	1.05275	0.836221	0.030537		2.59747	0.930946	0.763346	0.0271161		2.38424	0.823236	0.696821	0.0240784		2.18852	0.727988	0.636094	0.0213809		0.06	2.3057	0.699623	0.12		0.3	0.354921	0.15545	0.008		59.2754	27.3618	11.6403	1.72251	0.0937572	0.531983
1.15	1212.17	2.8	57.7	26.572	11.264	1.664	97.2		3.98169	1.71711	1.201	0.0490747		2.82662	1.05002	0.833954	0.0305111		2.59459	0.928533	0.761276	0.0270931		2.3816	0.821102	0.694932	0.0240579		2.18609	0.726101	0.634369	0.0213628		0.06	2.30344	0.699649	0.12		0.3	0.354778	0.155186	0.008		59.3621	27.3374	11.5885	1.71193	0.093422	0.530462
1.15	1212.61	2.9	57.725	26.521	11.202	1.652	97.1		3.97728	1.71266	1.19774	0.0490331		2.82349	1.0473	0.831694	0.0304852		2.59171	0.926128	0.759213	0.0270701		2.37895	0.818976	0.693049	0.0240375		2.18366	0.724221	0.63265	0.0213447		0.06	2.30119	0.699676	0.12		0.3	0.354636	0.154922	0.008		59.449	27.3131	11.5366	1.70134	0.0930868	0.528941
1.15	1213.04	3	57.75	26.47	11.14	1.64	97		3.97287	1.70823	1.1945	0.0489915		2.82036	1.04459	0.829442	0.0304594		2.58883	0.92373	0.757157	0.0270471		2.37632	0.816856	0.691172	0.0240171		2.18124	0.722346	0.630937	0.0213266		0.06	2.29894	0.699702	0.12		0.3	0.354494	0.154659	0.008		59.5361	27.2887	11.4845	1.69072	0.0927515	0.52742
1.15	1213.48	3.1	57.775	26.419	11.078	1.628	96.9		3.96846	1.70381	1.19127	0.04895		2.81723	1.04189	0.827197	0.0304336		2.58596	0.921341	0.755108	0.0270242		2.37368	0.814742	0.689301	0.0239968		2.17883	0.720477	0.62923	0.0213085		0.06	2.29669	0.699729	0.12		0.3	0.354352	0.154397	0.008		59.6233	27.2642	11.4324	1.68008	0.0924162	0.525899
1.15	1213.91	3.2	57.8	26.368	11.016	1.616	96.8		3.96407	1.6994	1.18804	0.0489085		2.81411	1.03919	0.82496	0.0304078		2.5831	0.918958	0.753066	0.0270013		2.37105	0.812636	0.687437	0.0239764		2.17641	0.718614	0.627528	0.0212904		0.06	2.29445	0.699756	0.12		0.3	0.35421	0.154135	0.008		59.7107	27.2397	11.3802	1.66942	0.0920808	0.524378
1.15	1214.35	3.3	57.825	26.317	10.954	1.604	96.7		3.95968	1.69501	1.18483	0.0488671		2.811	1.03651	0.82273	0.030382		2.58024	0.916584	0.75103	0.0269784		2.36843	0.810536	0.685579	0.0239561		2.174	0.716757	0.625831	0.0212724		0.06	2.29221	0.699782	0.12		0.3	0.354069	0.153874	0.008		59.7983	27.2151	11.3278	1.65874	0.0917454	0.522857
1.15	1214.78	3.4	57.85	26.266	10.892	1.592	96.6		3.9553	1.69063	1.18163	0.0488258		2.80789	1.03383	0.820507	0.0303563		2.57739	0.914217	0.749001	0.0269556		2.36581	0.808442	0.683726	0.0239359		2.1716	0.714906	0.62414	0.0212544		0.06	2.28997	0.699809	0.12		0.3	0.353927	0.153614	0.008		59.8861	27.1905	11.2754	1.64803	0.0914099	0.521336
1.15	1215.22	3.5	57.875	26.215	10.83	1.58	96.5		3.95093	1.68627	1.17844	0.0487845		2.80478	1.03116	0.818292	0.0303307		2.57454	0.911857	0.746978	0.0269328		2.36319	0.806356	0.68188	0.0239156		2.1692	0.713061	0.622455	0.0212365		0.06	2.28774	0.699835	0.12		0.3	0.353786	0.153354	0.008		59.9741	27.1658	11.2228	1.63731	0.0910743	0.519816
1.15	1215.65	3.6	57.9	26.164	10.768	1.568	96.4		3.94656	1.68192	1.17526	0.0487433		2.80168	1.0285	0.816083	0.030305		2.57169	0.909505	0.744963	0.0269101		2.36058	0.804276	0.68004	0.0238954		2.1668	0.711222	0.620775	0.0212185		0.06	2.28551	0.699862	0.12		0.3	0.353645	0.153094	0.008		60.0622	27.1411	11.1701	1.62656	0.0907387	0.518295
1.15	1216.09	3.7	57.925	26.113	10.706	1.556	96.3		3.9422	1.67758	1.17209	0.0487021		2.79859	1.02585	0.813882	0.0302795		2.56885	0.90716	0.742954	0.0268874		2.35798	0.802202	0.678206	0.0238753		2.16441	0.709388	0.619101	0.0212006		0.06	2.28328	0.699888	0.12		0.3	0.353503	0.152836	0.008		60.1506	27.1163	11.1173	1.61578	0.090403	0.516775
1.15	1216.52	3.8	57.95	26.062	10.644	1.544	96.2		3.93785	1.67326	1.16893	0.048661		2.7955	1.02321	0.811689	0.0302539		2.56602	0.904823	0.740951	0.0268647		2.35537	0.800135	0.676378	0.0238551		2.16202	0.70756	0.617433	0.0211827		0.06	2.28106	0.699915	0.12		0.3	0.353363	0.152578	0.008		60.2391	27.0915	11.0644	1.60499	0.0900672	0.515254
1.15	1216.96	3.9	57.975	26.011	10.582	1.532	96.1		3.93351	1.66895	1.16578	0.04862		2.79242	1.02057	0.809502	0.0302284		2.56319	0.902493	0.738955	0.026842		2.35277	0.798075	0.674556	0.023835		2.15963	0.705738	0.615769	0.0211648		0.06	2.27884	0.699942	0.12		0.3	0.353222	0.15232	0.008		60.3278	27.0666	11.0114	1.59417	0.0897314	0.513734
1.15	1217.39	4	58	25.96	10.52	1.52	96		3.92917	1.66466	1.16265	0.048579		2.78934	1.01795	0.807323	0.0302029		2.56036	0.90017	0.736966	0.0268194		2.35018	0.796021	0.67274	0.0238149		2.15725	0.703922	0.614111	0.021147		0.06	2.27663	0.699968	0.12		0.3	0.353081	0.152063	0.008		60.4167	27.0417	10.9583	1.58333	0.0893955	0.512213
1.15	1217.83	4.1	58.025	25.909	10.458	1.508	95.9		3.92485	1.66037	1.15952	0.0485381		2.78627	1.01533	0.805151	0.0301775		2.55754	0.897855	0.734983	0.0267968		2.34759	0.793974	0.67093	0.0237948		2.15488	0.702111	0.612459	0.0211292		0.06	2.27442	0.699994	0.12		0.3	0.35294	0.151807	0.008		60.5057	27.0167	10.9051	1.57247	0.0890595	0.510693
1.15	1218.26	4.2	58.05	25.858	10.396	1.496	95.8		3.92052	1.65611	1.1564	0.0484972		2.7832	1.01272	0.802985	0.030152		2.55472	0.895547	0.733006	0.0267742		2.34501	0.791933	0.669126	0.0237748		2.1525	0.700307	0.610812	0.0211114		0.06	2.27221	0.700021	0.12		0.3	0.3528	0.151551	0.008		60.595	26.9916	10.8518	1.56159	0.0887235	0.509173
1.15	1218.7	4.3	58.075	25.807	10.334	1.484	95.7		3.91621	1.65185	1.15329	0.0484564		2.78014	1.01012	0.800827	0.0301267		2.55191	0.893246	0.731036	0.0267517		2.34243	0.789898	0.667327	0.0237548		2.15014	0.698507	0.609171	0.0210936		0.06	2.27	0.700047	0.12		0.3	0.35266	0.151296	0.008		60.6844	26.9666	10.7983	1.55068	0.0883874	0.507653
1.15	1219.13	4.4	58.1	25.756	10.272	1.472	95.6		3.9119	1.64761	1.15019	0.0484157		2.77708	1.00752	0.798676	0.0301013		2.54911	0.890952	0.729073	0.0267292		2.33985	0.78787	0.665535	0.0237348		2.14777	0.696714	0.607534	0.0210759		0.06	2.2678	0.700074	0.12		0.3	0.35252	0.151041	0.008		60.7741	26.9414	10.7448	1.53975	0.0880512	0.506132
1.15	1219.57	4.5	58.125	25.705	10.21	1.46	95.5		3.9076	1.64338	1.14711	0.048375		2.77403	1.00494	0.796532	0.030076		2.54631	0.888666	0.727116	0.0267067		2.33728	0.785848	0.663748	0.0237149		2.14541	0.694926	0.605903	0.0210582		0.06	2.2656	0.7001	0.12		0.3	0.35238	0.150787	0.008		60.8639	26.9162	10.6911	1.5288	0.0877149	0.504612
1.15	1220	4.6	58.15	25.654	10.148	1.448	95.4		3.90331	1.63917	1.14403	0.0483343		2.77098	1.00236	0.794395	0.0300508		2.54351	0.886387	0.725165	0.0266843		2.33471	0.783833	0.661968	0.0236949		2.14305	0.693144	0.604278	0.0210405		0.06	2.26341	0.700127	0.12		0.3	0.35224	0.150533	0.008		60.9539	26.891	10.6373	1.51782	0.0873785	0.503092
1.15	1220.43	4.7	58.175	25.603	10.086	1.436	95.3		3.89903	1.63497	1.14096	0.0482937		2.76794	0.99979	0.792265	0.0300255		2.54072	0.884115	0.72322	0.0266619		2.33215	0.781824	0.660193	0.023675		2.1407	0.691367	0.602658	0.0210228		0.06	2.26121	0.700153	0.12		0.3	0.3521	0.15028	0.008		61.0441	26.8657	10.5834	1.50682	0.0870421	0.501572
1.15	1220.87	4.8	58.2	25.552	10.024	1.424	95.2		3.89475	1.63078	1.1379	0.0482532		2.7649	0.997229	0.790142	0.0300003		2.53793	0.88185	0.721282	0.0266395		2.32959	0.779821	0.658423	0.0236552		2.13835	0.689596	0.601043	0.0210052		0.06	2.25903	0.700179	0.12		0.3	0.351961	0.150028	0.008		61.1345	26.8403	10.5294	1.4958	0.0867055	0.500052
1.15	1221.3	4.9	58.225	25.501	9.962	1.412	95.1		3.89048	1.6266	1.13486	0.0482128		2.76187	0.994676	0.788026	0.0299752		2.53514	0.879593	0.719351	0.0266172		2.32703	0.777825	0.65666	0.0236353		2.13601	0.687831	0.599433	0.0209876		0.06	2.25684	0.700206	0.12		0.3	0.351821	0.149776	0.008		61.225	26.8149	10.4753	1.48475	0.0863689	0.498531
1.15	1221.74	5	58.25	25.45	9.9	1.4	95		3.88621	1.62244	1.13182	0.0481724		2.75884	0.992131	0.785917	0.0299501		2.53237	0.877342	0.717425	0.0265949		2.32448	0.775834	0.654902	0.0236155		2.13367	0.686071	0.597828	0.02097		0.06	2.25466	0.700232	0.12		0.3	0.351682	0.149525	0.008		61.3158	26.7895	10.4211	1.47368	0.0860322	0.497011
1.15	1222.17	5.1	58.275	25.399	9.838	1.388	94.9		3.88196	1.61829	1.12879	0.048132		2.75582	0.989594	0.783814	0.029925		2.52959	0.875099	0.715506	0.0265726		2.32194	0.773851	0.653151	0.0235958		2.13133	0.684317	0.596229	0.0209524		0.06	2.25248	0.700258	0.12		0.3	0.351543	0.149274	0.008		61.4067	26.764	10.3667	1.46259	0.0856954	0.495491
1.15	1222.61	5.2	58.3	25.348	9.776	1.376	94.8		3.87771	1.61416	1.12577	0.0480917		2.7528	0.987065	0.781719	0.0298999		2.52682	0.872862	0.713593	0.0265503		2.3194	0.771873	0.651404	0.023576		2.129	0.682568	0.594635	0.0209349		0.06	2.25031	0.700285	0.12		0.3	0.351404	0.149024	0.008		61.4979	26.7384	10.3122	1.45148	0.0853585	0.49397
1.15	1223.04	5.3	58.325	25.297	9.714	1.364	94.7		3.87346	1.61003	1.12276	0.0480515		2.74979	0.984544	0.77963	0.0298749		2.52406	0.870633	0.711686	0.0265281		2.31686	0.769901	0.649664	0.0235563		2.12667	0.680824	0.593046	0.0209174		0.06	2.24814	0.700311	0.12		0.3	0.351265	0.148775	0.008		61.5892	26.7128	10.2577	1.44034	0.0850215	0.49245
1.15	1223.48	5.4	58.35	25.246	9.652	1.352	94.6		3.86923	1.60592	1.11977	0.0480113		2.74678	0.982031	0.777548	0.0298499		2.5213	0.86841	0.709786	0.026506		2.31433	0.767936	0.647929	0.0235366		2.12434	0.679086	0.591463	0.0208999		0.06	2.24597	0.700337	0.12		0.3	0.351126	0.148526	0.008		61.6808	26.6871	10.203	1.42918	0.0846844	0.490929
1.15	1223.91	5.5	58.375	25.195	9.59	1.34	94.5		3.865	1.60183	1.11678	0.0479712		2.74378	0.979525	0.775473	0.029825		2.51854	0.866195	0.707892	0.0264838		2.3118	0.765977	0.6462	0.0235169		2.12202	0.677354	0.589884	0.0208824		0.06	2.2438	0.700364	0.12		0.3	0.350987	0.148277	0.008		61.7725	26.6614	10.1481	1.41799	0.0843473	0.489409
1.15	1224.35	5.6	58.4	25.144	9.528	1.328	94.4		3.86078	1.59774	1.1138	0.0479311		2.74079	0.977028	0.773405	0.0298001		2.51579	0.863986	0.706003	0.0264617		2.30927	0.764024	0.644476	0.0234973		2.1197	0.675627	0.588311	0.020865		0.06	2.24164	0.70039	0.12		0.3	0.350849	0.148029	0.008		61.8644	26.6356	10.0932	1.40678	0.08401	0.487888
1.15	1224.78	5.7	58.425	25.093	9.466	1.316	94.3		3.85657	1.59367	1.11083	0.0478911		2.73779	0.974538	0.771343	0.0297752		2.51305	0.861785	0.704121	0.0264396		2.30675	0.762077	0.642758	0.0234777		2.11739	0.673905	0.586742	0.0208475		0.06	2.23948	0.700416	0.12		0.3	0.350711	0.147782	0.008		61.9565	26.6098	10.0382	1.39555	0.0836726	0.486368
1.15	1225.22	5.8	58.45	25.042	9.404	1.304	94.2		3.85236	1.58961	1.10787	0.0478512		2.73481	0.972056	0.769288	0.0297504		2.51031	0.85959	0.702245	0.0264175		2.30423	0.760136	0.641046	0.0234581		2.11508	0.672189	0.585179	0.0208302		0.06	2.23733	0.700442	0.12		0.3	0.350572	0.147535	0.008		62.0488	26.5839	9.98301	1.38429	0.0833351	0.484847
1.15	1225.65	5.9	58.475	24.991	9.342	1.292	94.1		3.84816	1.58557	1.10492	0.0478113		2.73183	0.969582	0.76724	0.0297256		2.50757	0.857402	0.700376	0.0263955		2.30172	0.758201	0.639339	0.0234385		2.11277	0.670478	0.583621	0.0208128		0.06	2.23518	0.700468	0.12		0.3	0.350434	0.147289	0.008		62.1413	26.5579	9.92774	1.37301	0.0829975	0.483326
1.15	1226.09	6	58.5	24.94	9.28	1.28	94		3.84397	1.58153	1.10198	0.0477714		2.72885	0.967115	0.765198	0.0297008		2.50484	0.855221	0.698512	0.0263735		2.29921	0.756272	0.637637	0.023419		2.11047	0.668772	0.582068	0.0207954		0.06	2.23303	0.700495	0.12		0.3	0.350296	0.147044	0.008		62.234	26.5319	9.87234	1.3617	0.0826598	0.481805
1.15	1226.52	6.1	58.525	24.889	9.218	1.268	93.9		3.83978	1.57751	1.09905	0.0477316		2.72588	0.964657	0.763163	0.0296761		2.50211	0.853047	0.696654	0.0263516		2.29671	0.75435	0.635941	0.0233995		2.10817	0.667072	0.58052	0.0207781		0.06	2.23089	0.700521	0.12		0.3	0.350158	0.146799	0.008		62.3269	26.5059	9.81683	1.35037	0.0823219	0.480284
1.15	1226.96	6.2	58.55	24.838	9.156	1.256	93.8		3.8356	1.5735	1.09613	0.0476919		2.72291	0.962206	0.761134	0.0296514		2.49939	0.850879	0.694802	0.0263296		2.29421	0.752433	0.634251	0.02338		2.10588	0.665377	0.578977	0.0207608		0.06	2.22874	0.700547	0.12		0.3	0.350021	0.146554	0.008		62.42	26.4797	9.76119	1.33902	0.081984	0.478763
1.15	1227.39	6.3	58.575	24.787	9.094	1.244	93.7		3.83143	1.56951	1.09322	0.0476522		2.71995	0.959762	0.759112	0.0296267		2.49667	0.848718	0.692956	0.0263077		2.29172	0.750522	0.632566	0.0233606		2.10359	0.663687	0.577439	0.0207436		0.06	2.22661	0.700573	0.12		0.3	0.349883	0.14631	0.008		62.5133	26.4536	9.70544	1.32764	0.081646	0.477241
1.15	1227.83	6.4	58.6	24.736	9.032	1.232	93.6		3.82726	1.56552	1.09031	0.0476126		2.71699	0.957326	0.757097	0.0296021		2.49395	0.846564	0.691117	0.0262859		2.28922	0.748618	0.630887	0.0233411		2.1013	0.662003	0.575906	0.0207263		0.06	2.22447	0.700599	0.12		0.3	0.349746	0.146067	0.008		62.6068	26.4274	9.64957	1.31624	0.0813078	0.47572
1.15	1228.26	6.5	58.625	24.685	8.97	1.22	93.5		3.82311	1.56155	1.08742	0.0475731		2.71404	0.954898	0.755088	0.0295775		2.49124	0.844417	0.689283	0.026264		2.28674	0.746719	0.629213	0.0233218		2.09902	0.660324	0.574378	0.0207091		0.06	2.22234	0.700625	0.12		0.3	0.349609	0.145824	0.008		62.7005	26.4011	9.59358	1.30481	0.0809695	0.474198
1.15	1228.7	6.6	58.65	24.634	8.908	1.208	93.4		3.81895	1.5576	1.08454	0.0475336		2.71109	0.952477	0.753085	0.0295529		2.48854	0.842276	0.687455	0.0262422		2.28425	0.744826	0.627544	0.0233024		2.09674	0.65865	0.572854	0.0206919		0.06	2.22021	0.700652	0.12		0.3	0.349471	0.145581	0.008		62.7944	26.3747	9.53747	1.29336	0.0806311	0.472676
1.15	1229.13	6.7	58.675	24.583	8.846	1.196	93.3		3.81481	1.55365	1.08166	0.0474941		2.70815	0.950064	0.751089	0.0295284		2.48584	0.840143	0.685633	0.0262204		2.28178	0.742939	0.625881	0.0232831		2.09446	0.656981	0.571336	0.0206747		0.06	2.21809	0.700678	0.12		0.3	0.349334	0.14534	0.008		62.8885	26.3483	9.48124	1.28189	0.0802926	0.471155
1.15	1229.57	6.8	58.7	24.532	8.784	1.184	93.2		3.81067	1.54972	1.0788	0.0474547		2.70521	0.947659	0.7491	0.0295039		2.48314	0.838015	0.683817	0.0261987		2.2793	0.741058	0.624223	0.0232637		2.09219	0.655318	0.569823	0.0206576		0.06	2.21597	0.700704	0.12		0.3	0.349197	0.145098	0.008		62.9828	26.3219	9.42489	1.27039	0.0799539	0.469632
1.15	1230	6.9	58.725	24.481	8.722	1.172	93.1		3.80654	1.54579	1.07594	0.0474154		2.70228	0.94526	0.747117	0.0294795		2.48045	0.835895	0.682006	0.026177		2.27683	0.739182	0.62257	0.0232445		2.08992	0.653659	0.568314	0.0206405		0.06	2.21385	0.70073	0.12		0.3	0.349061	0.144858	0.008		63.0773	26.2954	9.36842	1.25886	0.0796151	0.46811
1.15	1230.43	7	58.75	24.43	8.66	1.16	93		3.80242	1.54188	1.07309	0.0473761		2.69935	0.94287	0.74514	0.029455		2.47776	0.83378	0.680202	0.0261553		2.27436	0.737313	0.620923	0.0232252		2.08766	0.652006	0.566811	0.0206234		0.06	2.21173	0.700756	0.12		0.3	0.348924	0.144617	0.008		63.172	26.2688	9.31183	1.24731	0.0792762	0.466588
1.15	1230.87	7.1	58.775	24.379	8.598	1.148	92.9		3.7983	1.53799	1.07026	0.0473369		2.69643	0.940486	0.74317	0.0294306		2.47508	0.831673	0.678403	0.0261336		2.2719	0.735449	0.619281	0.023206		2.0854	0.650358	0.565312	0.0206063		0.06	2.20962	0.700782	0.12		0.3	0.348788	0.144378	0.008		63.267	26.2422	9.25511	1.23574	0.0789372	0.465065
1.15	1231.3	7.2	58.8	24.328	8.536	1.136	92.8		3.79419	1.5341	1.06743	0.0472977		2.69351	0.938111	0.741206	0.0294063		2.4724	0.829572	0.676611	0.026112		2.26944	0.733591	0.617645	0.0231868		2.08314	0.648715	0.563818	0.0205892		0.06	2.20751	0.700808	0.12		0.3	0.348651	0.144139	0.008		63.3621	26.2155	9.19828	1.22414	0.078598	0.463542
1.15	1231.74	7.3	58.825	24.277	8.474	1.124	92.7		3.79009	1.53023	1.06461	0.0472586		2.6906	0.935742	0.739248	0.029382		2.46973	0.827477	0.674823	0.0260904		2.26699	0.731739	0.616013	0.0231676		2.08089	0.647077	0.562329	0.0205722		0.06	2.20541	0.700834	0.12		0.3	0.348515	0.1439	0.008		63.4574	26.1888	9.14132	1.21251	0.0782587	0.462019
1.15	1232.17	7.4	58.85	24.226	8.412	1.112	92.6		3.78599	1.52637	1.0618	0.0472196		2.68769	0.933381	0.737297	0.0293577		2.46706	0.825389	0.673042	0.0260688		2.26454	0.729892	0.614387	0.0231484		2.07864	0.645444	0.560844	0.0205552		0.06	2.2033	0.70086	0.12		0.3	0.348379	0.143662	0.008		63.5529	26.162	9.08423	1.20086	0.0779193	0.460496
1.15	1232.61	7.5	58.875	24.175	8.35	1.1	92.5		3.7819	1.52252	1.059	0.0471805		2.68479	0.931027	0.735352	0.0293334		2.46439	0.823308	0.671267	0.0260473		2.26209	0.728052	0.612766	0.0231293		2.0764	0.643817	0.559365	0.0205382		0.06	2.2012	0.700886	0.12		0.3	0.348243	0.143425	0.008		63.6486	26.1351	9.02703	1.18919	0.0775797	0.458973
1.15	1233.04	7.6	58.9	24.124	8.288	1.088	92.4		3.77782	1.51868	1.05621	0.0471416		2.68189	0.92868	0.733413	0.0293092		2.46173	0.821233	0.669497	0.0260258		2.25965	0.726217	0.611151	0.0231102		2.07415	0.642194	0.55789	0.0205213		0.06	2.19911	0.700912	0.12		0.3	0.348107	0.143188	0.008		63.7446	26.1082	8.9697	1.17749	0.07724	0.457449
1.15	1233.48	7.7	58.925	24.073	8.226	1.076	92.3		3.77374	1.51485	1.05342	0.0471027		2.679	0.926341	0.73148	0.029285		2.45908	0.819164	0.667732	0.0260043		2.25721	0.724387	0.60954	0.0230912		2.07192	0.640576	0.55642	0.0205043		0.06	2.19702	0.700938	0.12		0.3	0.347971	0.142951	0.008		63.8407	26.0813	8.91224	1.16576	0.0769001	0.455925
1.15	1233.91	7.8	58.95	24.022	8.164	1.064	92.2		3.76967	1.51104	1.05065	0.0470639		2.67611	0.924009	0.729554	0.0292609		2.45643	0.817102	0.665974	0.0259829		2.25478	0.722564	0.607935	0.0230721		2.06968	0.638964	0.554954	0.0204874		0.06	2.19493	0.700964	0.12		0.3	0.347836	0.142715	0.008		63.9371	26.0542	8.85466	1.15401	0.0765601	0.454401
1.15	1234.35	7.9	58.975	23.971	8.102	1.052	92.1		3.76561	1.50724	1.04788	0.0470251		2.67322	0.921684	0.727633	0.0292368		2.45378	0.815046	0.664221	0.0259615		2.25235	0.720746	0.606335	0.0230531		2.06745	0.637356	0.553494	0.0204705		0.06	2.19284	0.70099	0.12		0.3	0.347701	0.14248	0.008		64.0337	26.0271	8.79696	1.14224	0.0762199	0.452877
1.15	1234.78	8	59	23.92	8.04	1.04	92		3.76156	1.50345	1.04513	0.0469863		2.67035	0.919366	0.725719	0.0292127		2.45114	0.812996	0.662474	0.0259401		2.24992	0.718933	0.60474	0.0230341		2.06523	0.635753	0.552038	0.0204537		0.06	2.19076	0.701016	0.12		0.3	0.347565	0.142245	0.008		64.1304	26	8.73913	1.13043	0.0758796	0.451352
1.15	1235.22	8.1	59.025	23.869	7.978	1.028	91.9		3.75751	1.49967	1.04238	0.0469477		2.66747	0.917056	0.723811	0.0291886		2.4485	0.810953	0.660732	0.0259187		2.2475	0.717127	0.60315	0.0230152		2.063	0.634156	0.550586	0.0204369		0.06	2.18868	0.701042	0.12		0.3	0.34743	0.142011	0.008		64.2274	25.9728	8.68118	1.11861	0.0755392	0.449827
1.15	1235.65	8.2	59.05	23.818	7.916	1.016	91.8		3.75346	1.4959	1.03964	0.046909		2.6646	0.914753	0.721909	0.0291646		2.44586	0.808916	0.658996	0.0258974		2.24508	0.715325	0.601565	0.0229962		2.06078	0.632563	0.54914	0.02042		0.06	2.1866	0.701068	0.12		0.3	0.347295	0.141777	0.008		64.3246	25.9455	8.62309	1.10675	0.0751986	0.448302
1.15	1236.09	8.3	59.075	23.767	7.854	1.004	91.7		3.74943	1.49215	1.03691	0.0468705		2.66174	0.912456	0.720014	0.0291407		2.44323	0.806886	0.657265	0.0258761		2.24267	0.71353	0.599985	0.0229773		2.05857	0.630975	0.547697	0.0204032		0.06	2.18453	0.701093	0.12		0.3	0.34716	0.141544	0.008		64.422	25.9182	8.56489	1.09487	0.0748578	0.446776
1.15	1236.52	8.4	59.1	23.716	7.792	0.992	91.6		3.7454	1.48841	1.03419	0.046832		2.65888	0.910167	0.718124	0.0291167		2.44061	0.804861	0.65554	0.0258549		2.24026	0.71174	0.598411	0.0229584		2.05635	0.629392	0.54626	0.0203865		0.06	2.18246	0.701119	0.12		0.3	0.347025	0.141311	0.008		64.5197	25.8908	8.50655	1.08297	0.0745169	0.445251
1.15	1236.96	8.5	59.125	23.665	7.73	0.98	91.5		3.74138	1.48467	1.03148	0.0467935		2.65602	0.907885	0.71624	0.0290928		2.43799	0.802843	0.653821	0.0258336		2.23785	0.709955	0.596841	0.0229396		2.05415	0.627814	0.544827	0.0203697		0.06	2.18039	0.701145	0.12		0.3	0.346891	0.141078	0.008		64.6175	25.8634	8.44809	1.07104	0.0741758	0.443725
1.15	1237.39	8.6	59.15	23.614	7.668	0.968	91.4		3.73736	1.48095	1.02877	0.0467551		2.65317	0.90561	0.714363	0.0290689		2.43537	0.800831	0.652107	0.0258124		2.23545	0.708176	0.595277	0.0229208		2.05194	0.62624	0.543399	0.020353		0.06	2.17833	0.701171	0.12		0.3	0.346756	0.140847	0.008		64.7155	25.8359	8.3895	1.05908	0.0738346	0.442198
1.15	1237.83	8.7	59.175	23.563	7.606	0.956	91.3		3.73335	1.47724	1.02608	0.0467167		2.65032	0.903342	0.712491	0.0290451		2.43276	0.798826	0.650398	0.0257913		2.23305	0.706402	0.593717	0.0229019		2.04974	0.624672	0.541975	0.0203363		0.06	2.17626	0.701197	0.12		0.3	0.346622	0.140615	0.008		64.8138	25.8083	8.33078	1.0471	0.0734932	0.440672
1.15	1238.26	8.8	59.2	23.512	7.544	0.944	91.2		3.72935	1.47355	1.02339	0.0466784		2.64748	0.901081	0.710625	0.0290213		2.43015	0.796826	0.648695	0.0257701		2.23066	0.704634	0.592162	0.0228832		2.04754	0.623108	0.540556	0.0203196		0.06	2.17421	0.701223	0.12		0.3	0.346487	0.140385	0.008		64.9123	25.7807	8.27193	1.03509	0.0731516	0.439145
1.15	1238.7	8.9	59.225	23.461	7.482	0.932	91.1		3.72535	1.46986	1.02071	0.0466402		2.64464	0.898826	0.708766	0.0289975		2.42755	0.794833	0.646998	0.025749		2.22827	0.702871	0.590613	0.0228644		2.04535	0.62155	0.539141	0.020303		0.06	2.17215	0.701248	0.12		0.3	0.346353	0.140154	0.008		65.011	25.753	8.21295	1.02305	0.0728099	0.437617
1.15	1239.13	9	59.25	23.41	7.42	0.92	91		3.72136	1.46618	1.01804	0.046602		2.64181	0.896579	0.706912	0.0289737		2.42495	0.792846	0.645305	0.0257279		2.22588	0.701114	0.589068	0.0228457		2.04316	0.619996	0.537731	0.0202864		0.06	2.1701	0.701274	0.12		0.3	0.346219	0.139925	0.008		65.1099	25.7253	8.15385	1.01099	0.072468	0.43609
1.15	1239.57	9.1	59.275	23.359	7.358	0.908	90.9		3.71738	1.46252	1.01538	0.0465638		2.63899	0.894339	0.705064	0.02895		2.42235	0.790865	0.643619	0.0257068		2.2235	0.699362	0.587528	0.022827		2.04097	0.618446	0.536326	0.0202698		0.06	2.16805	0.7013	0.12		0.3	0.346085	0.139696	0.008		65.209	25.6975	8.09461	0.9989	0.0721259	0.434562
1.15	1240	9.2	59.3	23.308	7.296	0.896	90.8		3.7134	1.45887	1.01273	0.0465258		2.63616	0.892105	0.703222	0.0289263		2.41976	0.78889	0.641937	0.0256858		2.22112	0.697616	0.585993	0.0228083		2.03879	0.616902	0.534925	0.0202532		0.06	2.16601	0.701326	0.12		0.3	0.345952	0.139467	0.008		65.3084	25.6696	8.03524	0.986784	0.0717837	0.433033
1.15	1240.43	9.3	59.325	23.257	7.234	0.884	90.7		3.70943	1.45523	1.01008	0.0464877		2.63334	0.889879	0.701386	0.0289027		2.41717	0.786921	0.640261	0.0256648		2.21875	0.695874	0.584463	0.0227897		2.03661	0.615362	0.533528	0.0202366		0.06	2.16396	0.701351	0.12		0.3	0.345818	0.139239	0.008		65.4079	25.6417	7.97574	0.974642	0.0714413	0.431505
1.15	1240.87	9.4	59.35	23.206	7.172	0.872	90.6		3.70547	1.4516	1.00745	0.0464497		2.63053	0.887659	0.699556	0.0288791		2.41459	0.784958	0.63859	0.0256439		2.21638	0.694139	0.582938	0.0227711		2.03443	0.613827	0.532136	0.0202201		0.06	2.16193	0.701377	0.12		0.3	0.345685	0.139011	0.008		65.5077	25.6137	7.91611	0.962472	0.0710987	0.429976
1.15	1241.3	9.5	59.375	23.155	7.11	0.86	90.5		3.70151	1.44798	1.00482	0.0464118		2.62772	0.885446	0.697731	0.0288555		2.41201	0.783001	0.636925	0.0256229		2.21401	0.692408	0.581418	0.0227525		2.03226	0.612297	0.530748	0.0202036		0.06	2.15989	0.701403	0.12		0.3	0.345551	0.138784	0.008		65.6077	25.5856	7.85635	0.950276	0.0707559	0.428446
1.15	1241.74	9.6	59.4	23.104	7.048	0.848	90.4		3.69756	1.44437	1.0022	0.0463739		2.62492	0.88324	0.695913	0.0288319		2.40944	0.78105	0.635265	0.025602		2.21165	0.690683	0.579902	0.0227339		2.03009	0.610771	0.529364	0.0201871		0.06	2.15786	0.701428	0.12		0.3	0.345418	0.138557	0.008		65.708	25.5575	7.79646	0.938053	0.0704129	0.426917
1.15	1242.17	9.7	59.425	23.053	6.986	0.836	90.3		3.69362	1.44077	0.99959	0.0463361		2.62212	0.881041	0.6941	0.0288084		2.40687	0.779105	0.63361	0.0255811		2.20929	0.688963	0.578391	0.0227154		2.02793	0.609251	0.527985	0.0201706		0.06	2.15583	0.701454	0.12		0.3	0.345285	0.138331	0.008		65.8084	25.5293	7.73643	0.925803	0.0700698	0.425386
1.15	1242.61	9.8	59.45	23.002	6.924	0.824	90.2		3.68968	1.43719	0.996988	0.0462983		2.61932	0.878848	0.692293	0.0287849		2.4043	0.777166	0.63196	0.0255603		2.20693	0.687248	0.576886	0.0226968		2.02576	0.607734	0.526611	0.0201542		0.06	2.1538	0.70148	0.12		0.3	0.345152	0.138105	0.008		65.9091	25.5011	7.67627	0.913525	0.0697265	0.423856
1.15	1243.04	9.9	59.475	22.951	6.862	0.812	90.1		3.68575	1.43361	0.994393	0.0462606		2.61653	0.876662	0.690491	0.0287615		2.40174	0.775233	0.630316	0.0255394		2.20458	0.685539	0.575385	0.0226783		2.02361	0.606223	0.525241	0.0201378		0.06	2.15178	0.701505	0.12		0.3	0.345019	0.13788	0.008		66.01	25.4728	7.61598	0.901221	0.069383	0.422325
1.15	1243.48	10	59.5	22.9	6.8	0.8	90		3.68183	1.43005	0.991807	0.0462229		2.61375	0.874483	0.688696	0.0287381		2.39918	0.773306	0.628677	0.0255186		2.20223	0.683835	0.573888	0.0226599		2.02145	0.604716	0.523875	0.0201214		0.06	2.14975	0.701531	0.12		0.3	0.344886	0.137655	0.008		66.1111	25.4444	7.55556	0.888889	0.0690393	0.420793
1.15	1243.91	10.1	59.525	22.849	6.738	0.788	89.9		3.67791	1.4265	0.98923	0.0461853		2.61096	0.87231	0.686906	0.0287147		2.39663	0.771384	0.627043	0.0254979		2.19989	0.682136	0.572397	0.0226414		2.0193	0.603213	0.522513	0.020105		0.06	2.14774	0.701557	0.12		0.3	0.344754	0.137431	0.008		66.2125	25.416	7.49499	0.876529	0.0686954	0.419261
1.15	1244.35	10.2	59.55	22.798	6.676	0.776	89.8		3.674	1.42295	0.98666	0.0461478		2.60819	0.870144	0.685121	0.0286913		2.39408	0.769469	0.625414	0.0254771		2.19755	0.680442	0.57091	0.022623		2.01715	0.601715	0.521156	0.0200886		0.06	2.14572	0.701582	0.12		0.3	0.344621	0.137207	0.008		66.314	25.3875	7.4343	0.864143	0.0683513	0.417729
1.15	1244.78	10.3	59.575	22.747	6.614	0.764	89.7		3.67009	1.41942	0.984099	0.0461103		2.60541	0.867985	0.683343	0.028668		2.39154	0.767559	0.62379	0.0254564		2.19521	0.678753	0.569428	0.0226046		2.01501	0.600222	0.519803	0.0200723		0.06	2.14371	0.701608	0.12		0.3	0.344489	0.136984	0.008		66.4158	25.359	7.37347	0.851728	0.068007	0.416196
1.15	1245.22	10.4	59.6	22.696	6.552	0.752	89.6		3.66619	1.4159	0.981545	0.0460728		2.60265	0.865832	0.68157	0.0286447		2.389	0.765656	0.622172	0.0254358		2.19288	0.67707	0.56795	0.0225863		2.01287	0.598734	0.518454	0.020056		0.06	2.1417	0.701634	0.12		0.3	0.344357	0.136762	0.008		66.5179	25.3304	7.3125	0.839286	0.0676626	0.414663
1.15	1245.65	10.5	59.625	22.645	6.49	0.74	89.5		3.6623	1.41239	0.979	0.0460354		2.59988	0.863686	0.679802	0.0286215		2.38646	0.763758	0.620558	0.0254151		2.19055	0.675392	0.566478	0.0225679		2.01073	0.597249	0.51711	0.0200397		0.06	2.1397	0.701659	0.12		0.3	0.344225	0.136539	0.008		66.6201	25.3017	7.2514	0.826816	0.0673179	0.41313
1.15	1246.09	10.6	59.65	22.594	6.428	0.728	89.4		3.65841	1.40889	0.976463	0.045998		2.59712	0.861546	0.678041	0.0285982		2.38393	0.761866	0.61895	0.0253945		2.18823	0.673718	0.565009	0.0225496		2.0086	0.59577	0.51577	0.0200235		0.06	2.13769	0.701685	0.12		0.3	0.344093	0.136318	0.008		66.7226	25.2729	7.19016	0.814318	0.066973	0.411596
1.15	1246.52	10.7	59.675	22.543	6.366	0.716	89.3		3.65453	1.40541	0.973934	0.0459607		2.59437	0.859413	0.676284	0.028575		2.3814	0.759979	0.617347	0.0253739		2.18591	0.67205	0.563546	0.0225313		2.00647	0.594295	0.514434	0.0200072		0.06	2.1357	0.70171	0.12		0.3	0.343961	0.136096	0.008		66.8253	25.2441	7.12878	0.801792	0.0666279	0.410061
1.15	1246.96	10.8	59.7	22.492	6.304	0.704	89.2		3.65066	1.40193	0.971412	0.0459235		2.59162	0.857286	0.674534	0.0285519		2.37887	0.758099	0.615749	0.0253533		2.18359	0.670387	0.562087	0.0225131		2.00434	0.592824	0.513102	0.019991		0.06	2.1337	0.701736	0.12		0.3	0.343829	0.135876	0.008		66.9283	25.2152	7.06726	0.789238	0.0662826	0.408526
1.15	1247.39	10.9	59.725	22.441	6.242	0.692	89.1		3.64679	1.39846	0.968899	0.0458863		2.58888	0.855166	0.672789	0.0285288		2.37635	0.756224	0.614156	0.0253328		2.18128	0.668729	0.560633	0.0224948		2.00222	0.591358	0.511774	0.0199748		0.06	2.13171	0.701761	0.12		0.3	0.343698	0.135655	0.008		67.0314	25.1863	7.00561	0.776655	0.0659371	0.40699
1.15	1247.83	11	59.75	22.39	6.18	0.68	89		3.64293	1.395	0.966394	0.0458491		2.58613	0.853052	0.671049	0.0285057		2.37384	0.754355	0.612568	0.0253123		2.17897	0.667077	0.559183	0.0224766		2.0001	0.589896	0.510451	0.0199586		0.06	2.12972	0.701787	0.12		0.3	0.343566	0.135435	0.008		67.1348	25.1573	6.94382	0.764045	0.0655914	0.405454
1.15	1248.26	11.1	59.775	22.339	6.118	0.668	88.9		3.63908	1.39156	0.963897	0.045812		2.5834	0.850945	0.669315	0.0284826		2.37133	0.752491	0.610985	0.0252918		2.17666	0.665429	0.557738	0.0224584		1.99798	0.588439	0.509132	0.0199425		0.06	2.12773	0.701812	0.12		0.3	0.343435	0.135216	0.008		67.2385	25.1282	6.88189	0.751406	0.0652455	0.403918
1.15	1248.7	11.2	59.8	22.288	6.056	0.656	88.8		3.63523	1.38812	0.961407	0.045775		2.58067	0.848844	0.667586	0.0284596		2.36882	0.750633	0.609407	0.0252713		2.17436	0.663786	0.556298	0.0224403		1.99587	0.586986	0.507817	0.0199264		0.06	2.12574	0.701838	0.12		0.3	0.343304	0.134997	0.008		67.3423	25.0991	6.81982	0.738739	0.0648994	0.402381
1.15	1249.13	11.3	59.825	22.237	5.994	0.644	88.7		3.63139	1.3847	0.958925	0.045738		2.57794	0.84675	0.665863	0.0284366		2.36632	0.748781	0.607834	0.0252509		2.17206	0.662148	0.554862	0.0224221		1.99376	0.585538	0.506506	0.0199103		0.06	2.12376	0.701863	0.12		0.3	0.343172	0.134779	0.008		67.4464	25.0699	6.75761	0.726043	0.064553	0.400843
1.15	1249.57	11.4	59.85	22.186	5.932	0.632	88.6		3.62755	1.38128	0.956452	0.045701		2.57522	0.844661	0.664145	0.0284136		2.36382	0.746935	0.606266	0.0252305		2.16977	0.660515	0.55343	0.022404		1.99165	0.584094	0.5052	0.0198942		0.06	2.12178	0.701889	0.12		0.3	0.343042	0.134561	0.008		67.5508	25.0406	6.69526	0.713318	0.0642065	0.399305
1.15	1250	11.5	59.875	22.135	5.87	0.62	88.5		3.62372	1.37788	0.953986	0.0456642		2.5725	0.84258	0.662433	0.0283907		2.36132	0.745094	0.604703	0.0252101		2.16748	0.658887	0.552003	0.0223859		1.98955	0.582654	0.503897	0.0198781		0.06	2.11981	0.701914	0.12		0.3	0.342911	0.134344	0.008		67.6554	25.0113	6.63277	0.700565	0.0638597	0.397767
1.15	1250.43	11.6	59.9	22.084	5.808	0.608	88.4		3.6199	1.37448	0.951527	0.0456273		2.56978	0.840504	0.660726	0.0283677		2.35883	0.743258	0.603144	0.0251898		2.16519	0.657264	0.550581	0.0223679		1.98745	0.581219	0.502599	0.0198621		0.06	2.11784	0.70194	0.12		0.3	0.34278	0.134127	0.008		67.7602	24.9819	6.57014	0.687783	0.0635127	0.396227
1.15	1250.87	11.7	59.925	22.033	5.746	0.596	88.3		3.61608	1.3711	0.949077	0.0455905		2.56707	0.838435	0.659024	0.0283449		2.35634	0.741429	0.601591	0.0251695		2.16291	0.655646	0.549163	0.0223498		1.98536	0.579788	0.501304	0.0198461		0.06	2.11587	0.701965	0.12		0.3	0.342649	0.13391	0.008		67.8652	24.9524	6.50736	0.674972	0.0631654	0.394688
1.15	1251.3	11.8	59.95	21.982	5.684	0.584	88.2		3.61227	1.36773	0.946634	0.0455538		2.56437	0.836372	0.657328	0.028322		2.35386	0.739604	0.600043	0.0251492		2.16063	0.654033	0.54775	0.0223318		1.98326	0.578362	0.500014	0.0198301		0.06	2.1139	0.70199	0.12		0.3	0.342519	0.133694	0.008		67.9705	24.9229	6.44444	0.662132	0.062818	0.393147
1.15	1251.74	11.9	59.975	21.931	5.622	0.572	88.1		3.60847	1.36436	0.944199	0.0455171		2.56167	0.834315	0.655637	0.0282992		2.35138	0.737786	0.598499	0.025129		2.15835	0.652424	0.54634	0.0223138		1.98117	0.576939	0.498728	0.0198141		0.06	2.11194	0.702016	0.12		0.3	0.342389	0.133479	0.008		68.076	24.8933	6.38138	0.649262	0.0624703	0.391606
1.15	1252.17	12	60	21.88	5.56	0.56	88		3.60467	1.36101	0.941771	0.0454804		2.55897	0.832265	0.653951	0.0282764		2.3489	0.735972	0.59696	0.0251087		2.15608	0.650821	0.544936	0.0222959		1.97909	0.575521	0.497445	0.0197982		0.06	2.10997	0.702041	0.12		0.3	0.342258	0.133264	0.008		68.1818	24.8636	6.31818	0.636364	0.0621223	0.390065
1.15	1252.61	12.1	60.025	21.829	5.498	0.548	87.9		3.60088	1.35767	0.939351	0.0454439		2.55628	0.830221	0.652271	0.0282537		2.34643	0.734165	0.595426	0.0250885		2.15381	0.649222	0.543536	0.0222779		1.97701	0.574108	0.496167	0.0197822		0.06	2.10802	0.702066	0.12		0.3	0.342128	0.133049	0.008		68.2878	24.8339	6.25484	0.623436	0.0617742	0.388523
1.15	1253.04	12.2	60.05	21.778	5.436	0.536	87.8		3.59709	1.35433	0.936939	0.0454073		2.55359	0.828182	0.650596	0.028231		2.34397	0.732362	0.593897	0.0250684		2.15155	0.647629	0.54214	0.02226		1.97493	0.572699	0.494893	0.0197663		0.06	2.10606	0.702092	0.12		0.3	0.341998	0.132835	0.008		68.3941	24.8041	6.19134	0.610478	0.0614258	0.38698
1.15	1253.48	12.3	60.075	21.727	5.374	0.524	87.7		3.59331	1.35101	0.934534	0.0453708		2.55091	0.826151	0.648926	0.0282083		2.3415	0.730566	0.592373	0.0250482		2.14929	0.64604	0.540748	0.0222421		1.97285	0.571293	0.493623	0.0197504		0.06	2.10411	0.702117	0.12		0.3	0.341869	0.132621	0.008		68.5006	24.7742	6.12771	0.597491	0.0610771	0.385437
1.15	1253.91	12.4	60.1	21.676	5.312	0.512	87.6		3.58954	1.3477	0.932137	0.0453344		2.54823	0.824125	0.647261	0.0281856		2.33904	0.728774	0.590853	0.0250281		2.14703	0.644456	0.539361	0.0222243		1.97078	0.569893	0.492357	0.0197346		0.06	2.10216	0.702142	0.12		0.3	0.341739	0.132408	0.008		68.6073	24.7443	6.06393	0.584475	0.0607282	0.383893
1.15	1254.35	12.5	60.125	21.625	5.25	0.5	87.5		3.58577	1.3444	0.929747	0.045298		2.54555	0.822105	0.645602	0.028163		2.33659	0.726988	0.589339	0.025008		2.14478	0.642876	0.537978	0.0222064		1.96871	0.568496	0.491094	0.0197187		0.06	2.10021	0.702168	0.12		0.3	0.341609	0.132195	0.008		68.7143	24.7143	6	0.571429	0.0603791	0.382349
1.15	1254.78	12.6	60.15	21.574	5.188	0.488	87.4		3.58201	1.3411	0.927365	0.0452617		2.54288	0.820092	0.643948	0.0281404		2.33414	0.725208	0.587829	0.0249879		2.14253	0.641302	0.5366	0.0221886		1.96665	0.567104	0.489836	0.0197029		0.06	2.09827	0.702193	0.12		0.3	0.34148	0.131983	0.008		68.8215	24.6842	5.93593	0.558352	0.0600298	0.380803
1.15	1255.22	12.7	60.175	21.523	5.126	0.476	87.3		3.57825	1.33782	0.92499	0.0452254		2.54022	0.818084	0.642299	0.0281178		2.33169	0.723432	0.586323	0.0249679		2.14028	0.639732	0.535226	0.0221708		1.96458	0.565715	0.488582	0.0196871		0.06	2.09633	0.702218	0.12		0.3	0.34135	0.131771	0.008		68.929	24.6541	5.87171	0.545246	0.0596801	0.379258
1.15	1255.65	12.8	60.2	21.472	5.064	0.464	87.2		3.5745	1.33455	0.922623	0.0451891		2.53755	0.816083	0.640655	0.0280953		2.32925	0.721662	0.584823	0.0249479		2.13804	0.638167	0.533856	0.0221531		1.96253	0.564331	0.487331	0.0196713		0.06	2.09439	0.702244	0.12		0.3	0.341221	0.13156	0.008		69.0367	24.6239	5.80734	0.53211	0.0593303	0.377711
1.15	1256.09	12.9	60.225	21.421	5.002	0.452	87.1		3.57076	1.33128	0.920263	0.0451529		2.5349	0.814087	0.639016	0.0280728		2.32681	0.719898	0.583327	0.0249279		2.1358	0.636606	0.532491	0.0221353		1.96047	0.562951	0.486085	0.0196556		0.06	2.09246	0.702269	0.12		0.3	0.341092	0.131349	0.008		69.1447	24.5936	5.74282	0.518944	0.0589802	0.376164
1.15	1256.52	13	60.25	21.37	4.94	0.44	87		3.56702	1.32803	0.91791	0.0451168		2.53224	0.812098	0.637383	0.0280503		2.32437	0.718139	0.581835	0.024908		2.13356	0.635051	0.531129	0.0221176		1.95842	0.561576	0.484842	0.0196399		0.06	2.09053	0.702294	0.12		0.3	0.340963	0.131139	0.008		69.2529	24.5632	5.67816	0.505747	0.0586298	0.374616
1.15	1256.96	13.1	60.275	21.319	4.878	0.428	86.9		3.56329	1.32479	0.915565	0.0450807		2.52959	0.810114	0.635754	0.0280279		2.32194	0.716385	0.580349	0.024888		2.13133	0.6335	0.529772	0.0220999		1.95637	0.560204	0.483603	0.0196241		0.06	2.0886	0.702319	0.12		0.3	0.340834	0.130929	0.008		69.3613	24.5328	5.61335	0.49252	0.0582792	0.373068
1.15	1257.39	13.2	60.3	21.268	4.816	0.416	86.8		3.55956	1.32155	0.913227	0.0450447		2.52695	0.808137	0.634131	0.0280055		2.31951	0.714636	0.578867	0.0248681		2.1291	0.631953	0.528419	0.0220823		1.95432	0.558837	0.482368	0.0196085		0.06	2.08667	0.702344	0.12		0.3	0.340705	0.130719	0.008		69.47	24.5023	5.54839	0.479263	0.0579283	0.371519
1.15	1257.83	13.3	60.325	21.217	4.754	0.404	86.7		3.55584	1.31833	0.910896	0.0450087		2.52431	0.806165	0.632512	0.0279831		2.31709	0.712893	0.57739	0.0248483		2.12688	0.630412	0.527071	0.0220646		1.95228	0.557473	0.481137	0.0195928		0.06	2.08475	0.70237	0.12		0.3	0.340577	0.13051	0.008		69.579	24.4717	5.48328	0.465975	0.0575771	0.369969
1.15	1258.26	13.4	60.35	21.166	4.692	0.392	86.6		3.55213	1.31512	0.908573	0.0449727		2.52167	0.8042	0.630899	0.0279608		2.31467	0.711155	0.575917	0.0248284		2.12466	0.628875	0.525727	0.022047		1.95024	0.556114	0.47991	0.0195771		0.06	2.08283	0.702395	0.12		0.3	0.340448	0.130302	0.008		69.6882	24.4411	5.41801	0.452656	0.0572257	0.368419
1.15	1258.7	13.5	60.375	21.115	4.63	0.38	86.5		3.54842	1.31191	0.906257	0.0449368		2.51904	0.80224	0.629291	0.0279385		2.31225	0.709422	0.574449	0.0248086		2.12244	0.627342	0.524386	0.0220294		1.94821	0.554759	0.478687	0.0195615		0.06	2.08091	0.70242	0.12		0.3	0.34032	0.130093	0.008		69.7977	24.4104	5.3526	0.439306	0.056874	0.366867
1.15	1259.13	13.6	60.4	21.064	4.568	0.368	86.4		3.54472	1.30872	0.903948	0.044901		2.51641	0.800286	0.627688	0.0279162		2.30984	0.707694	0.572985	0.0247888		2.12023	0.625814	0.52305	0.0220118		1.94618	0.553408	0.477467	0.0195459		0.06	2.079	0.702445	0.12		0.3	0.340192	0.129886	0.008		69.9074	24.3796	5.28704	0.425926	0.0565221	0.365315
1.15	1259.57	13.7	60.425	21.013	4.506	0.356	86.3		3.54103	1.30553	0.901646	0.0448652		2.51379	0.798338	0.626089	0.0278939		2.30743	0.705971	0.571526	0.0247691		2.11801	0.624291	0.521718	0.0219943		1.94415	0.552061	0.476251	0.0195303		0.06	2.07709	0.70247	0.12		0.3	0.340064	0.129678	0.008		70.0174	24.3488	5.22132	0.412514	0.0561699	0.363763
1.15	1260	13.8	60.45	20.962	4.444	0.344	86.2		3.53734	1.30235	0.899352	0.0448294		2.51117	0.796396	0.624496	0.0278717		2.30503	0.704254	0.570072	0.0247493		2.11581	0.622772	0.520391	0.0219767		1.94212	0.550718	0.475039	0.0195148		0.06	2.07518	0.702495	0.12		0.3	0.339936	0.129472	0.008		70.1276	24.3179	5.15545	0.399072	0.0558174	0.362209
1.15	1260.43	13.9	60.475	20.911	4.382	0.332	86.1		3.53365	1.29919	0.897064	0.0447937		2.50856	0.79446	0.622908	0.0278495		2.30263	0.702542	0.568622	0.0247296		2.1136	0.621258	0.519067	0.0219592		1.9401	0.549379	0.473831	0.0194992		0.06	2.07327	0.70252	0.12		0.3	0.339808	0.129265	0.008		70.2381	24.2869	5.08943	0.385598	0.0554646	0.360655
1.15	1260.87	14	60.5	20.86	4.32	0.32	86		3.52997	1.29603	0.894784	0.0447581		2.50594	0.79253	0.621324	0.0278273		2.30023	0.700835	0.567177	0.0247099		2.1114	0.619749	0.517748	0.0219418		1.93808	0.548044	0.472627	0.0194837		0.06	2.07137	0.702546	0.12		0.3	0.33968	0.129059	0.008		70.3488	24.2558	5.02326	0.372093	0.0551116	0.3591
1.15	1261.3	14.1	60.525	20.809	4.258	0.308	85.9		3.5263	1.29288	0.892511	0.0447225		2.50334	0.790605	0.619746	0.0278052		2.29784	0.699133	0.565736	0.0246903		2.10921	0.618243	0.516432	0.0219243		1.93606	0.546713	0.471426	0.0194682		0.06	2.06947	0.702571	0.12		0.3	0.339552	0.128854	0.008		70.4598	24.2247	4.95693	0.358556	0.0547583	0.357544
1.15	1261.74	14.2	60.55	20.758	4.196	0.296	85.8		3.52264	1.28975	0.890245	0.0446869		2.50074	0.788686	0.618172	0.0277831		2.29545	0.697436	0.564299	0.0246706		2.10702	0.616743	0.515121	0.0219069		1.93405	0.545386	0.470229	0.0194527		0.06	2.06757	0.702596	0.12		0.3	0.339425	0.128649	0.008		70.5711	24.1935	4.89044	0.344988	0.0544047	0.355988
1.15	1262.17	14.3	60.575	20.707	4.134	0.284	85.7		3.51898	1.28662	0.887986	0.0446514		2.49814	0.786773	0.616603	0.027761		2.29306	0.695744	0.562867	0.024651		2.10483	0.615247	0.513814	0.0218895		1.93204	0.544063	0.469036	0.0194373		0.06	2.06568	0.702621	0.12		0.3	0.339297	0.128444	0.008		70.6826	24.1622	4.8238	0.331389	0.0540508	0.354431
1.15	1262.61	14.4	60.6	20.656	4.072	0.272	85.6		3.51532	1.2835	0.885733	0.044616		2.49554	0.784865	0.61504	0.027739		2.29068	0.694057	0.56144	0.0246315		2.10264	0.613755	0.512511	0.0218721		1.93003	0.542744	0.467846	0.0194218		0.06	2.06378	0.702646	0.12		0.3	0.33917	0.12824	0.008		70.7944	24.1308	4.75701	0.317757	0.0536966	0.352873
1.15	1263.04	14.5	60.625	20.605	4.01	0.26	85.5		3.51167	1.28039	0.883488	0.0445806		2.49295	0.782964	0.613481	0.027717		2.28831	0.692375	0.560016	0.0246119		2.10046	0.612268	0.511212	0.0218547		1.92803	0.541429	0.46666	0.0194064		0.06	2.0619	0.702671	0.12		0.3	0.339043	0.128037	0.008		70.9064	24.0994	4.69006	0.304094	0.0533422	0.351314
1.15	1263.48	14.6	60.65	20.554	3.948	0.248	85.4		3.50803	1.27729	0.88125	0.0445452		2.49037	0.781068	0.611926	0.027695		2.28593	0.690699	0.558598	0.0245924		2.09828	0.610785	0.509917	0.0218374		1.92603	0.540118	0.465478	0.019391		0.06	2.06001	0.702696	0.12		0.3	0.338916	0.127833	0.008		71.0187	24.0679	4.62295	0.290398	0.0529874	0.349754
1.15	1263.91	14.7	60.675	20.503	3.886	0.236	85.3		3.50439	1.2742	0.879019	0.0445099		2.48779	0.779177	0.610377	0.027673		2.28356	0.689027	0.557183	0.0245729		2.0961	0.609307	0.508626	0.0218201		1.92404	0.538811	0.464299	0.0193757		0.06	2.05813	0.702721	0.12		0.3	0.338789	0.12763	0.008		71.1313	24.0363	4.55569	0.276671	0.0526324	0.348194
1.15	1264.35	14.8	60.7	20.452	3.824	0.224	85.2		3.50076	1.27111	0.876794	0.0444746		2.48521	0.777292	0.608832	0.0276511		2.2812	0.68736	0.555773	0.0245534		2.09393	0.607833	0.507338	0.0218028		1.92204	0.537507	0.463125	0.0193603		0.06	2.05625	0.702746	0.12		0.3	0.338662	0.127428	0.008		71.2441	24.0047	4.48826	0.262911	0.052277	0.346632
1.15	1264.78	14.9	60.725	20.401	3.762	0.212	85.1		3.49714	1.26804	0.874577	0.0444394		2.48264	0.775413	0.607293	0.0276292		2.27884	0.685699	0.554368	0.024534		2.09176	0.606364	0.506055	0.0217855		1.92005	0.536208	0.461953	0.019345		0.06	2.05437	0.702771	0.12		0.3	0.338535	0.127226	0.008		71.3572	23.973	4.42068	0.249119	0.0519214	0.34507
1.15	1265.22	15	60.75	20.35	3.7	0.2	85		3.49352	1.26498	0.872366	0.0444042		2.48007	0.77354	0.605758	0.0276073		2.27648	0.684042	0.552967	0.0245146		2.0896	0.604899	0.504776	0.0217683		1.91806	0.534912	0.460786	0.0193297		0.06	2.05249	0.702796	0.12		0.3	0.338409	0.127025	0.008		71.4706	23.9412	4.35294	0.235294	0.0515654	0.343507
1.15	1265.65	15.1	60.775	20.299	3.638	0.188	84.9		3.48991	1.26192	0.870163	0.0443691		2.4775	0.771672	0.604227	0.0275855		2.27412	0.68239	0.55157	0.0244952		2.08744	0.603438	0.503501	0.0217511		1.91608	0.533621	0.459622	0.0193144		0.06	2.05062	0.702821	0.12		0.3	0.338282	0.126824	0.008		71.5842	23.9093	4.28504	0.221437	0.0512092	0.341943
1.15	1266.09	15.2	60.8	20.248	3.576	0.176	84.8		3.4863	1.25888	0.867966	0.044334		2.47494	0.769809	0.602702	0.0275637		2.27177	0.680743	0.550177	0.0244758		2.08528	0.601982	0.50223	0.0217339		1.9141	0.532333	0.458461	0.0192991		0.06	2.04875	0.702846	0.12		0.3	0.338156	0.126623	0.008		71.6981	23.8774	4.21698	0.207547	0.0508527	0.340379
1.15	1266.52	15.3	60.825	20.197	3.514	0.164	84.7		3.4827	1.25584	0.865775	0.044299		2.47238	0.767952	0.601181	0.0275419		2.26942	0.679101	0.548789	0.0244565		2.08313	0.600529	0.500963	0.0217167		1.91212	0.531049	0.457304	0.0192839		0.06	2.04688	0.702871	0.12		0.3	0.33803	0.126423	0.008		71.8123	23.8453	4.14876	0.193625	0.0504958	0.338813
1.15	1266.96	15.4	60.85	20.146	3.452	0.152	84.6		3.4791	1.25281	0.863592	0.044264		2.46983	0.766101	0.599665	0.0275202		2.26708	0.677464	0.547405	0.0244372		2.08098	0.599082	0.499699	0.0216996		1.91015	0.529768	0.456151	0.0192686		0.06	2.04502	0.702896	0.12		0.3	0.337904	0.126223	0.008		71.9267	23.8132	4.08038	0.179669	0.0501386	0.337247
1.15	1267.39	15.5	60.875	20.095	3.39	0.14	84.5		3.47551	1.24979	0.861415	0.0442291		2.46728	0.764255	0.598153	0.0274984		2.26474	0.675831	0.546025	0.0244179		2.07883	0.597638	0.49844	0.0216824		1.90818	0.528492	0.455001	0.0192534		0.06	2.04316	0.70292	0.12		0.3	0.337778	0.126023	0.008		72.0414	23.7811	4.01183	0.16568	0.0497812	0.335679
1.15	1267.83	15.6	60.9	20.044	3.328	0.128	84.4		3.47193	1.24678	0.859245	0.0441942		2.46474	0.762415	0.596647	0.0274768		2.26241	0.674204	0.54465	0.0243986		2.07668	0.596199	0.497184	0.0216653		1.90621	0.527219	0.453855	0.0192382		0.06	2.0413	0.702945	0.12		0.3	0.337652	0.125825	0.008		72.1564	23.7488	3.94313	0.151659	0.0494234	0.334111
1.15	1268.26	15.7	60.925	19.993	3.266	0.116	84.3		3.46835	1.24378	0.857082	0.0441594		2.4622	0.76058	0.595144	0.0274551		2.26007	0.672581	0.543278	0.0243794		2.07454	0.594764	0.495932	0.0216483		1.90424	0.525951	0.452712	0.0192231		0.06	2.03944	0.70297	0.12		0.3	0.337526	0.125626	0.008		72.2716	23.7165	3.87426	0.137604	0.0490653	0.332542
1.15	1268.7	15.8	60.95	19.942	3.204	0.104	84.2		3.46477	1.24079	0.854925	0.0441246		2.45966	0.758751	0.593647	0.0274335		2.25774	0.670964	0.541911	0.0243602		2.07241	0.593334	0.494684	0.0216312		1.90228	0.524685	0.451573	0.0192079		0.06	2.03759	0.702995	0.12		0.3	0.3374	0.125428	0.008		72.3872	23.6841	3.80523	0.123515	0.0487068	0.330972
1.15	1269.13	15.9	60.975	19.891	3.142	0.092	84.1		3.46121	1.23781	0.852775	0.0440899		2.45713	0.756927	0.592154	0.0274119		2.25542	0.669351	0.540548	0.024341		2.07027	0.591907	0.49344	0.0216142		1.90032	0.523424	0.450438	0.0191928		0.06	2.03574	0.70302	0.12		0.3	0.337275	0.12523	0.008		72.503	23.6516	3.73603	0.109394	0.0483481	0.329401
1.15	1269.57	16	61	19.84	0	0.08	80.92		3.45764	1.23484	0.850632	0.0440552		2.4546	0.755108	0.590666	0.0273903		2.2531	0.667743	0.53919	0.0243219		2.06814	0.590485	0.4922	0.0215972		1.89837	0.522167	0.449305	0.0191777		0.06	2.03389	0.703045	0.12		0.3	0.33715	0.125033	0.008		75.3831	24.518	0	0.0988631	0.0369829	0.262892
1.15	1270	16.1	60.9807	19.7593	0	0.08	80.82		3.45409	1.23187	0.848495	0.0440205		2.45207	0.753295	0.589182	0.0273688		2.25078	0.666139	0.537835	0.0243027		2.06601	0.589067	0.490964	0.0215802		1.89642	0.520913	0.448177	0.0191626		0.06	2.03205	0.70307	0.12		0.3	0.337024	0.124836	0.008		75.4525	24.4486	0	0.0989854	0.0368538	0.262493
1.15	1270.43	16.2	60.9614	19.6786	0	0.08	80.72		3.45054	1.22891	0.846365	0.0439859		2.44955	0.751487	0.587703	0.0273472		2.24847	0.66454	0.536485	0.0242836		2.06389	0.587654	0.489731	0.0215632		1.89447	0.519663	0.447052	0.0191476		0.06	2.03021	0.703094	0.12		0.3	0.336899	0.12464	0.008		75.522	24.3789	0	0.099108	0.0367249	0.262092
1.15	1270.87	16.3	60.942	19.598	0	0.08	80.62		3.44699	1.22597	0.844241	0.0439513		2.44704	0.749684	0.586228	0.0273258		2.24616	0.662946	0.535139	0.0242645		2.06177	0.586244	0.488502	0.0215463		1.89252	0.518416	0.44593	0.0191325		0.06	2.02837	0.703119	0.12		0.3	0.336774	0.124444	0.008		75.5917	24.309	0	0.099231	0.0365961	0.261691
1.15	1271.3	16.4	60.9227	19.5173	0	0.08	80.52		3.44345	1.22303	0.842124	0.0439168		2.44452	0.747887	0.584758	0.0273043		2.24385	0.661357	0.533797	0.0242455		2.05965	0.584839	0.487277	0.0215294		1.89058	0.517173	0.444812	0.0191175		0.06	2.02653	0.703144	0.12		0.3	0.336649	0.124248	0.008		75.6616	24.239	0	0.0993542	0.0364676	0.261289
1.15	1271.74	16.5	60.9034	19.4366	0	0.08	80.42		3.43992	1.2201	0.840013	0.0438824		2.44201	0.746095	0.583292	0.0272829		2.24155	0.659773	0.532459	0.0242265		2.05754	0.583438	0.486056	0.0215125		1.88864	0.515934	0.443697	0.0191025		0.06	2.0247	0.703169	0.12		0.3	0.336524	0.124053	0.008		75.7317	24.1689	0	0.0994777	0.0363392	0.260885
1.15	1272.17	16.6	60.8841	19.3559	0	0.08	80.32		3.43639	1.21718	0.837909	0.043848		2.43951	0.744309	0.581831	0.0272615		2.23925	0.658193	0.531125	0.0242075		2.05543	0.58204	0.484838	0.0214956		1.8867	0.514699	0.442585	0.0190875		0.06	2.02286	0.703193	0.12		0.3	0.3364	0.123858	0.008		75.8019	24.0985	0	0.0996016	0.036211	0.260481
1.15	1272.61	16.7	60.8648	19.2752	0	0.08	80.22		3.43287	1.21426	0.835811	0.0438136		2.43701	0.742528	0.580375	0.0272401		2.23696	0.656618	0.529796	0.0241885		2.05332	0.580648	0.483625	0.0214787		1.88477	0.513467	0.441477	0.0190726		0.06	2.02104	0.703218	0.12		0.3	0.336275	0.123664	0.008		75.8723	24.028	0	0.0997258	0.0360829	0.260076
1.15	1273.04	16.8	60.8455	19.1945	0	0.08	80.12		3.42935	1.21136	0.83372	0.0437793		2.43451	0.740752	0.578922	0.0272188		2.23466	0.655047	0.52847	0.0241695		2.05122	0.579259	0.482414	0.0214619		1.88283	0.512239	0.440373	0.0190576		0.06	2.01921	0.703243	0.12		0.3	0.336151	0.12347	0.008		75.9429	23.9572	0	0.0998502	0.035955	0.259669
1.15	1273.48	16.9	60.8261	19.1139	0	0.08	80.02		3.42584	1.20846	0.831635	0.043745		2.43202	0.738981	0.577475	0.0271975		2.23238	0.653481	0.527148	0.0241506		2.04912	0.577874	0.481208	0.0214451		1.88091	0.511014	0.439271	0.0190427		0.06	2.01739	0.703268	0.12		0.3	0.336026	0.123277	0.008		76.0137	23.8864	0	0.099975	0.0358273	0.259261
1.15	1273.91	17	60.8068	19.0332	0	0.08	79.92		3.42234	1.20558	0.829557	0.0437108		2.42953	0.737215	0.576031	0.0271762		2.23009	0.65192	0.525831	0.0241317		2.04702	0.576493	0.480005	0.0214283		1.87898	0.509794	0.438173	0.0190278		0.06	2.01557	0.703292	0.12		0.3	0.335902	0.123084	0.008		76.0846	23.8153	0	0.1001	0.0356998	0.258853
1.15	1274.35	17.1	60.7875	18.9525	0	0.08	79.82		3.41884	1.2027	0.827485	0.0436766		2.42705	0.735455	0.574592	0.0271549		2.22781	0.650363	0.524517	0.0241129		2.04493	0.575117	0.478806	0.0214116		1.87706	0.508576	0.437079	0.0190129		0.06	2.01375	0.703317	0.12		0.3	0.335778	0.122891	0.008		76.1557	23.744	0	0.100226	0.0355724	0.258443
1.15	1274.78	17.2	60.7682	18.8718	0	0.08	79.72		3.41534	1.19983	0.825419	0.0436424		2.42457	0.7337	0.573158	0.0271337		2.22553	0.648811	0.523208	0.024094		2.04284	0.573744	0.477611	0.0213948		1.87514	0.507363	0.435988	0.018998		0.06	2.01193	0.703342	0.12		0.3	0.335654	0.122699	0.008		76.227	23.6726	0	0.100351	0.0354452	0.258032
1.15	1275.22	17.3	60.7489	18.7911	0	0.08	79.62		3.41185	1.19696	0.823359	0.0436083		2.42209	0.73195	0.571728	0.0271125		2.22326	0.647264	0.521902	0.0240752		2.04075	0.572376	0.476419	0.0213781		1.87323	0.506152	0.4349	0.0189832		0.06	2.01012	0.703366	0.12		0.3	0.33553	0.122507	0.008		76.2985	23.601	0	0.100477	0.0353182	0.25762
1.15	1275.65	17.4	60.7295	18.7105	0	0.08	79.52		3.40837	1.19411	0.821306	0.0435743		2.41962	0.730205	0.570302	0.0270913		2.22099	0.645721	0.520601	0.0240564		2.03867	0.571011	0.475231	0.0213614		1.87131	0.504946	0.433815	0.0189684		0.06	2.00831	0.703391	0.12		0.3	0.335406	0.122315	0.008		76.3702	23.5292	0	0.100604	0.0351913	0.257207
1.15	1276.09	17.5	60.7102	18.6298	0	0.08	79.42		3.40489	1.19127	0.819259	0.0435403		2.41715	0.728465	0.568881	0.0270702		2.21872	0.644182	0.519303	0.0240376		2.03659	0.569651	0.474047	0.0213448		1.8694	0.503743	0.432734	0.0189536		0.06	2.0065	0.703416	0.12		0.3	0.335283	0.122124	0.008		76.442	23.4573	0	0.10073	0.0350646	0.256793
1.15	1276.52	17.6	60.6909	18.5491	0	0.08	79.32		3.40142	1.18843	0.817218	0.0435063		2.41468	0.726731	0.567464	0.0270491		2.21646	0.642649	0.51801	0.0240189		2.03451	0.568295	0.472866	0.0213281		1.8675	0.502543	0.431656	0.0189388		0.06	2.0047	0.70344	0.12		0.3	0.335159	0.121934	0.008		76.514	23.3851	0	0.100857	0.0349381	0.256378
1.15	1276.96	17.7	60.6716	18.4684	0	0.08	79.22		3.39795	1.1856	0.815184	0.0434724		2.41222	0.725001	0.566051	0.027028		2.2142	0.641119	0.51672	0.0240001		2.03244	0.566942	0.471689	0.0213115		1.86559	0.501347	0.430582	0.018924		0.06	2.00289	0.703465	0.12		0.3	0.335036	0.121744	0.008		76.5862	23.3128	0	0.100985	0.0348117	0.255961
1.15	1277.39	17.8	60.6523	18.3877	0	0.08	79.12		3.39449	1.18278	0.813155	0.0434386		2.40976	0.723277	0.564643	0.0270069		2.21195	0.639594	0.515435	0.0239814		2.03037	0.565594	0.470515	0.0212949		1.86369	0.500155	0.42951	0.0189093		0.06	2.0011	0.703489	0.12		0.3	0.334912	0.121554	0.008		76.6586	23.2403	0	0.101112	0.0346855	0.255544
1.15	1277.83	17.9	60.633	18.307	0	0.08	79.02		3.39103	1.17997	0.811133	0.0434047		2.40731	0.721558	0.563238	0.0269859		2.20969	0.638074	0.514153	0.0239628		2.0283	0.564249	0.469345	0.0212783		1.8618	0.498966	0.428442	0.0188946		0.06	1.9993	0.703514	0.12		0.3	0.334789	0.121364	0.008		76.7311	23.1676	0	0.10124	0.0345594	0.255126
1.15	1278.26	18	60.6136	18.2264	0	0.08	78.92		3.38758	1.17717	0.809117	0.043371		2.40486	0.719843	0.561839	0.0269649		2.20744	0.636558	0.512875	0.0239441		2.02624	0.562909	0.468179	0.0212618		1.8599	0.497781	0.427377	0.0188799		0.06	1.9975	0.703539	0.12		0.3	0.334666	0.121175	0.008		76.8039	23.0947	0	0.101368	0.0344335	0.254706
1.15	1278.7	18.1	60.5943	18.1457	0	0.08	78.82		3.38414	1.17437	0.807108	0.0433372		2.40241	0.718134	0.560443	0.0269439		2.2052	0.635047	0.511601	0.0239255		2.02417	0.561572	0.467016	0.0212452		1.85801	0.496599	0.426316	0.0188652		0.06	1.99571	0.703563	0.12		0.3	0.334543	0.120987	0.008		76.8768	23.0217	0	0.101497	0.0343078	0.254285
1.15	1279.13	18.2	60.575	18.065	0	0.08	78.72		3.3807	1.17158	0.805104	0.0433035		2.39997	0.71643	0.559052	0.026923		2.20296	0.63354	0.510331	0.0239069		2.02212	0.560239	0.465856	0.0212287		1.85612	0.49542	0.425257	0.0188505		0.06	1.99392	0.703588	0.12		0.3	0.33442	0.120798	0.008		76.9499	22.9484	0	0.101626	0.0341822	0.253863
1.15	1279.57	18.3	60.5557	17.9843	0	0.08	78.62		3.37726	1.16881	0.803106	0.0432699		2.39753	0.714731	0.557664	0.0269021		2.20072	0.632037	0.509065	0.0238883		2.02006	0.558911	0.4647	0.0212122		1.85424	0.494245	0.424202	0.0188359		0.06	1.99214	0.703612	0.12		0.3	0.334298	0.120611	0.008		77.0233	22.875	0	0.101755	0.0340568	0.25344
1.15	1280	18.4	60.5364	17.9036	0	0.08	78.52		3.37383	1.16604	0.801115	0.0432363		2.3951	0.713036	0.556282	0.0268812		2.19849	0.630539	0.507802	0.0238698		2.01801	0.557586	0.463548	0.0211957		1.85235	0.493074	0.42315	0.0188213		0.06	1.99035	0.703637	0.12		0.3	0.334175	0.120423	0.008		77.0967	22.8014	0	0.101885	0.0339315	0.253016
1.15	1280.43	18.5	60.517	17.823	0	0.08	78.42		3.37041	1.16327	0.799129	0.0432028		2.39267	0.711347	0.554903	0.0268603		2.19626	0.629045	0.506544	0.0238513		2.01596	0.556265	0.462399	0.0211793		1.85047	0.491905	0.422102	0.0188067		0.06	1.98857	0.703661	0.12		0.3	0.334052	0.120236	0.008		77.1704	22.7276	0	0.102015	0.0338064	0.252591
1.15	1280.87	18.6	60.4977	17.7423	0	0.08	78.32		3.36699	1.16052	0.79715	0.0431693		2.39024	0.709663	0.553528	0.0268395		2.19403	0.627555	0.505289	0.0238328		2.01392	0.554948	0.461254	0.0211629		1.8486	0.490741	0.421056	0.0187921		0.06	1.98679	0.703686	0.12		0.3	0.33393	0.12005	0.008		77.2443	22.6536	0	0.102145	0.0336815	0.252164
1.15	1281.3	18.7	60.4784	17.6616	0	0.08	78.22		3.36358	1.15777	0.795176	0.0431358		2.38782	0.707983	0.552158	0.0268187		2.1918	0.62607	0.504038	0.0238143		2.01188	0.553634	0.460112	0.0211465		1.84672	0.489579	0.420014	0.0187775		0.06	1.98502	0.70371	0.12		0.3	0.333808	0.119863	0.008		77.3183	22.5794	0	0.102276	0.0335567	0.251737
1.15	1281.74	18.8	60.4591	17.5809	0	0.08	78.12		3.36017	1.15503	0.793209	0.0431024		2.3854	0.706309	0.550792	0.0267979		2.18958	0.624589	0.502791	0.0237959		2.00984	0.552325	0.458973	0.0211301		1.84485	0.488421	0.418974	0.018763		0.06	1.98324	0.703735	0.12		0.3	0.333686	0.119678	0.008		77.3926	22.505	0	0.102407	0.0334321	0.251308
1.15	1282.17	18.9	60.4398	17.5002	0	0.08	78.02		3.35677	1.1523	0.791247	0.043069		2.38299	0.704639	0.54943	0.0267772		2.18737	0.623113	0.501548	0.0237774		2.00781	0.551019	0.457838	0.0211137		1.84298	0.487267	0.417938	0.0187484		0.06	1.98147	0.703759	0.12		0.3	0.333564	0.119492	0.008		77.467	22.4304	0	0.102538	0.0333076	0.250878
1.15	1282.61	19	60.4205	17.4195	0	0.08	77.92		3.35337	1.14958	0.789292	0.0430357		2.38058	0.702975	0.548072	0.0267565		2.18515	0.621641	0.500308	0.023759		2.00577	0.549718	0.456707	0.0210974		1.84112	0.486116	0.416905	0.0187339		0.06	1.9797	0.703784	0.12		0.3	0.333442	0.119307	0.008		77.5417	22.3557	0	0.102669	0.0331832	0.250447
1.15	1283.04	19.1	60.4011	17.3389	0	0.08	77.82		3.34998	1.14687	0.787342	0.0430024		2.37817	0.701315	0.546718	0.0267358		2.18294	0.620173	0.499072	0.0237407		2.00374	0.54842	0.455579	0.0210811		1.83926	0.484968	0.415876	0.0187194		0.06	1.97794	0.703808	0.12		0.3	0.33332	0.119122	0.008		77.6165	22.2807	0	0.102801	0.033059	0.250015
1.15	1283.48	19.2	60.3818	17.2582	0	0.08	77.72		3.3466	1.14416	0.785398	0.0429692		2.37576	0.69966	0.545368	0.0267151		2.18074	0.61871	0.49784	0.0237223		2.00172	0.547125	0.454454	0.0210648		1.8374	0.483823	0.414849	0.018705		0.06	1.97618	0.703833	0.12		0.3	0.333198	0.118938	0.008		77.6915	22.2056	0	0.102934	0.032935	0.249582
1.15	1283.91	19.3	60.3625	17.1775	0	0.08	77.62		3.34321	1.14146	0.78346	0.042936		2.37336	0.698009	0.544023	0.0266945		2.17853	0.61725	0.496612	0.023704		1.9997	0.545835	0.453333	0.0210485		1.83554	0.482682	0.413825	0.0186905		0.06	1.97441	0.703857	0.12		0.3	0.333076	0.118754	0.008		77.7667	22.1302	0	0.103066	0.0328111	0.249147
1.15	1284.35	19.4	60.3432	17.0968	0	0.08	77.52		3.33984	1.13877	0.781528	0.0429028		2.37097	0.696364	0.542681	0.0266739		2.17633	0.615795	0.495387	0.0236857		1.99768	0.544548	0.452215	0.0210323		1.83369	0.481544	0.412805	0.0186761		0.06	1.97266	0.703881	0.12		0.3	0.332955	0.118571	0.008		77.8421	22.0547	0	0.103199	0.0326874	0.248711
1.15	1284.78	19.5	60.3239	17.0161	0	0.08	77.42		3.33647	1.13609	0.779602	0.0428697		2.36857	0.694723	0.541344	0.0266533		2.17414	0.614344	0.494166	0.0236674		1.99566	0.543265	0.4511	0.021016		1.83184	0.48041	0.411787	0.0186617		0.06	1.9709	0.703906	0.12		0.3	0.332834	0.118388	0.008		77.9177	21.979	0	0.103332	0.0325638	0.248275
1.15	1285.22	19.6	60.3045	16.9355	0	0.08	77.32		3.3331	1.13341	0.777682	0.0428366		2.36619	0.693088	0.54001	0.0266327		2.17195	0.612898	0.492949	0.0236491		1.99365	0.541986	0.449989	0.0209998		1.82999	0.479279	0.410773	0.0186473		0.06	1.96915	0.70393	0.12		0.3	0.332712	0.118205	0.008		77.9935	21.9031	0	0.103466	0.0324404	0.247837
1.15	1285.65	19.7	60.2852	16.8548	0	0.08	77.22		3.32974	1.13075	0.775767	0.0428036		2.3638	0.691456	0.538681	0.0266122		2.16976	0.611456	0.491735	0.0236309		1.99164	0.540711	0.448881	0.0209836		1.82815	0.478151	0.409762	0.0186329		0.06	1.9674	0.703954	0.12		0.3	0.332591	0.118022	0.008		78.0694	21.827	0	0.1036	0.0323171	0.247397
1.15	1286.09	19.8	60.2659	16.7741	0	0.08	77.12		3.32639	1.12809	0.773859	0.0427707		2.36142	0.68983	0.537355	0.0265917		2.16757	0.610017	0.490526	0.0236127		1.98963	0.539439	0.447777	0.0209675		1.8263	0.477026	0.408754	0.0186186		0.06	1.96565	0.703979	0.12		0.3	0.33247	0.11784	0.008		78.1456	21.7506	0	0.103734	0.0321939	0.246957
1.15	1286.52	19.9	60.2466	16.6934	0	0.08	77.02		3.32304	1.12543	0.771956	0.0427377		2.35904	0.688209	0.536034	0.0265712		2.16539	0.608583	0.489319	0.0235945		1.98763	0.538171	0.446676	0.0209513		1.82447	0.475905	0.407748	0.0186042		0.06	1.9639	0.704003	0.12		0.3	0.332349	0.117659	0.008		78.222	21.6741	0	0.103869	0.0320709	0.246515
1.15	1286.96	20	60.2273	16.6127	0	0.08	76.92		3.3197	1.12279	0.770058	0.0427048		2.35667	0.686592	0.534716	0.0265508		2.16321	0.607154	0.488117	0.0235764		1.98563	0.536906	0.445578	0.0209352		1.82263	0.474787	0.406746	0.0185899		0.06	1.96216	0.704027	0.12		0.3	0.332228	0.117478	0.008		78.2986	21.5974	0	0.104004	0.031948	0.246072
1.15	1287.39	20.1	60.208	16.532	0	0.08	76.82		3.31636	1.12015	0.768167	0.042672		2.3543	0.68498	0.533403	0.0265303		2.16103	0.605728	0.486918	0.0235582		1.98363	0.535646	0.444483	0.0209191		1.8208	0.473672	0.405747	0.0185756		0.06	1.96042	0.704052	0.12		0.3	0.332108	0.117297	0.008		78.3754	21.5205	0	0.10414	0.0318253	0.245628
1.15	1287.83	20.2	60.1886	16.4514	0	0.08	76.72		3.31303	1.11752	0.766281	0.0426392		2.35193	0.683372	0.532094	0.02651		2.15886	0.604306	0.485722	0.0235401		1.98164	0.534389	0.443392	0.020903		1.81897	0.47256	0.404751	0.0185613		0.06	1.95868	0.704076	0.12		0.3	0.331987	0.117116	0.008		78.4523	21.4434	0	0.104275	0.0317027	0.245183
1.15	1288.26	20.3	60.1693	16.3707	0	0.08	76.62		3.3097	1.1149	0.764401	0.0426064		2.34957	0.681769	0.530788	0.0264896		2.15669	0.602889	0.48453	0.0235221		1.97965	0.533135	0.442304	0.020887		1.81714	0.471452	0.403758	0.0185471		0.06	1.95695	0.7041	0.12		0.3	0.331867	0.116936	0.008		78.5295	21.3661	0	0.104411	0.0315803	0.244737
1.15	1288.7	20.4	60.15	16.29	0	0.08	76.52		3.30637	1.11229	0.762526	0.0425737		2.34721	0.680171	0.529486	0.0264693		2.15453	0.601476	0.483342	0.023504		1.97766	0.531885	0.44122	0.0208709		1.81531	0.470347	0.402768	0.0185328		0.06	1.95521	0.704125	0.12		0.3	0.331746	0.116757	0.008		78.6069	21.2886	0	0.104548	0.031458	0.244289
1.15	1289.13	20.5	60.1307	16.2093	0	0.08	76.42		3.30306	1.10968	0.760657	0.0425411		2.34485	0.678577	0.528189	0.0264489		2.15237	0.600067	0.482158	0.023486		1.97568	0.530639	0.440138	0.0208549		1.81349	0.469245	0.401781	0.0185186		0.06	1.95348	0.704149	0.12		0.3	0.331626	0.116577	0.008		78.6845	21.2108	0	0.104685	0.0313358	0.24384
1.15	1289.57	20.6	60.1114	16.1286	0	0.08	76.32		3.29974	1.10709	0.758794	0.0425084		2.3425	0.676988	0.526895	0.0264287		2.15021	0.598661	0.480976	0.0234679		1.9737	0.529397	0.43906	0.0208389		1.81167	0.468146	0.400796	0.0185044		0.06	1.95176	0.704173	0.12		0.3	0.331506	0.116398	0.008		78.7623	21.1329	0	0.104822	0.0312138	0.24339
1.15	1290	20.7	60.092	16.048	0	0.08	76.22		3.29644	1.10449	0.756936	0.0424758		2.34016	0.675404	0.525605	0.0264084		2.14805	0.59726	0.479799	0.02345		1.97172	0.528158	0.437985	0.0208229		1.80986	0.46705	0.399815	0.0184902		0.06	1.95003	0.704197	0.12		0.3	0.331386	0.11622	0.008		78.8403	21.0548	0	0.104959	0.0310919	0.242938
1.15	1290.43	20.8	60.0727	15.9673	0	0.08	76.12		3.29313	1.10191	0.755084	0.0424433		2.33781	0.673824	0.524319	0.0263882		2.1459	0.595863	0.478625	0.023432		1.96974	0.526922	0.436913	0.020807		1.80805	0.465958	0.398837	0.0184761		0.06	1.94831	0.704221	0.12		0.3	0.331266	0.116042	0.008		78.9185	20.9764	0	0.105097	0.0309702	0.242486
1.15	1290.87	20.9	60.0534	15.8866	0	0.08	76.02		3.28984	1.09934	0.753238	0.0424108		2.33547	0.672249	0.523036	0.026368		2.14375	0.59447	0.477454	0.0234141		1.96777	0.525691	0.435845	0.0207911		1.80624	0.464869	0.397862	0.0184619		0.06	1.94659	0.704246	0.12		0.3	0.331146	0.115864	0.008		78.9969	20.8979	0	0.105235	0.0308486	0.242032
1.15	1291.3	21	60.0341	15.8059	0	0.08	75.92		3.28654	1.09677	0.751397	0.0423784		2.33313	0.670679	0.521758	0.0263478		2.14161	0.593082	0.476288	0.0233961		1.9658	0.524462	0.43478	0.0207751		1.80443	0.463783	0.396889	0.0184478		0.06	1.94487	0.70427	0.12		0.3	0.331026	0.115686	0.008		79.0755	20.8192	0	0.105374	0.0307271	0.241577
1.15	1291.74	21.1	60.0148	15.7252	0	0.08	75.82		3.28326	1.09421	0.749561	0.0423459		2.3308	0.669112	0.520484	0.0263276		2.13946	0.591697	0.475124	0.0233782		1.96383	0.523238	0.433718	0.0207593		1.80262	0.4627	0.39592	0.0184337		0.06	1.94315	0.704294	0.12		0.3	0.330907	0.115509	0.008		79.1543	20.7402	0	0.105513	0.0306057	0.241121
1.15	1292.17	21.2	59.9955	15.6445	0	0.08	75.72		3.27998	1.09165	0.747731	0.0423136		2.32847	0.667551	0.519213	0.0263075		2.13733	0.590316	0.473964	0.0233604		1.96187	0.522017	0.432659	0.0207434		1.80082	0.46162	0.394953	0.0184196		0.06	1.94144	0.704318	0.12		0.3	0.330787	0.115333	0.008		79.2333	20.661	0	0.105652	0.0304845	0.240663
1.15	1292.61	21.3	59.9761	15.5639	0	0.08	75.62		3.2767	1.08911	0.745907	0.0422813		2.32614	0.665994	0.517946	0.0262874		2.13519	0.588939	0.472808	0.0233425		1.95991	0.520799	0.431603	0.0207275		1.79902	0.460543	0.393989	0.0184055		0.06	1.93973	0.704342	0.12		0.3	0.330668	0.115156	0.008		79.3125	20.5817	0	0.105792	0.0303634	0.240204
1.15	1293.04	21.4	59.9568	15.4832	0	0.08	75.52		3.27343	1.08657	0.744087	0.042249		2.32382	0.664441	0.516683	0.0262673		2.13306	0.587566	0.471655	0.0233247		1.95795	0.519585	0.43055	0.0207117		1.79723	0.459469	0.393028	0.0183915		0.06	1.93802	0.704367	0.12		0.3	0.330548	0.11498	0.008		79.392	20.5021	0	0.105932	0.0302425	0.239744
1.15	1293.48	21.5	59.9375	15.4025	0	0.08	75.42		3.27016	1.08404	0.742274	0.0422167		2.3215	0.662893	0.515423	0.0262473		2.13093	0.586197	0.470505	0.0233069		1.956	0.518374	0.429501	0.0206959		1.79543	0.458399	0.39207	0.0183774		0.06	1.93632	0.704391	0.12		0.3	0.330429	0.114805	0.008		79.4716	20.4223	0	0.106073	0.0301217	0.239282
1.15	1293.91	21.6	59.9182	15.3218	0	0.08	75.32		3.2669	1.08151	0.740466	0.0421845		2.31919	0.66135	0.514168	0.0262273		2.1288	0.584832	0.469359	0.0232891		1.95405	0.517167	0.428455	0.0206801		1.79364	0.457331	0.391115	0.0183634		0.06	1.93461	0.704415	0.12		0.3	0.33031	0.114629	0.008		79.5515	20.3423	0	0.106213	0.030001	0.23882
1.15	1294.35	21.7	59.8989	15.2411	0	0.08	75.22		3.26364	1.07899	0.738663	0.0421524		2.31687	0.65981	0.512916	0.0262073		2.12668	0.583471	0.468216	0.0232714		1.9521	0.515964	0.427412	0.0206644		1.79185	0.456267	0.390163	0.0183494		0.06	1.93291	0.704439	0.12		0.3	0.330191	0.114454	0.008		79.6316	20.2621	0	0.106355	0.0298804	0.238356
1.15	1294.78	21.8	59.8795	15.1605	0	0.08	75.12		3.26039	1.07648	0.736865	0.0421203		2.31457	0.658276	0.511668	0.0261873		2.12456	0.582114	0.467077	0.0232536		1.95016	0.514764	0.426372	0.0206486		1.79007	0.455206	0.389214	0.0183354		0.06	1.93121	0.704463	0.12		0.3	0.330072	0.11428	0.008		79.7119	20.1816	0	0.106496	0.02976	0.23789
1.15	1295.22	21.9	59.8602	15.0798	0	0.08	75.02		3.25714	1.07398	0.735073	0.0420882		2.31226	0.656745	0.510424	0.0261674		2.12245	0.58076	0.465941	0.0232359		1.94822	0.513567	0.425335	0.0206329		1.78829	0.454148	0.388267	0.0183215		0.06	1.92952	0.704487	0.12		0.3	0.329954	0.114106	0.008		79.7924	20.101	0	0.106638	0.0296397	0.237424
1.15	1295.65	22	59.8409	14.9991	0	0.08	74.92		3.2539	1.07149	0.733287	0.0420562		2.30996	0.655219	0.509183	0.0261475		2.12034	0.579411	0.464808	0.0232183		1.94628	0.512374	0.424301	0.0206172		1.78651	0.453092	0.387323	0.0183075		0.06	1.92782	0.704511	0.12		0.3	0.329835	0.113932	0.008		79.8731	20.0201	0	0.106781	0.0295195	0.236956
1.15	1296.09	22.1	59.8216	14.9184	0	0.08	74.82		3.25067	1.069	0.731505	0.0420242		2.30766	0.653698	0.507946	0.0261276		2.11823	0.578066	0.463679	0.0232006		1.94434	0.511184	0.42327	0.0206015		1.78473	0.45204	0.386383	0.0182936		0.06	1.92613	0.704535	0.12		0.3	0.329717	0.113759	0.008		79.954	19.9391	0	0.106923	0.0293995	0.236487
1.15	1296.52	22.2	59.8023	14.8377	0	0.08	74.72		3.24744	1.06652	0.729729	0.0419922		2.30537	0.652181	0.506713	0.0261077		2.11612	0.576724	0.462553	0.023183		1.94241	0.509997	0.422242	0.0205859		1.78296	0.450991	0.385444	0.0182797		0.06	1.92445	0.704559	0.12		0.3	0.329598	0.113585	0.008		80.0352	19.8578	0	0.107066	0.0292796	0.236016
1.15	1296.96	22.3	59.783	14.757	0	0.08	74.62		3.24421	1.06404	0.727959	0.0419603		2.30308	0.650668	0.505483	0.0260879		2.11402	0.575386	0.461431	0.0231654		1.94048	0.508814	0.421218	0.0205702		1.78118	0.449945	0.384509	0.0182658		0.06	1.92276	0.704583	0.12		0.3	0.32948	0.113413	0.008		80.1165	19.7763	0	0.10721	0.0291598	0.235544
1.15	1297.39	22.4	59.7636	14.6764	0	0.08	74.52		3.24099	1.06158	0.726193	0.0419285		2.30079	0.649159	0.504257	0.0260681		2.11192	0.574052	0.460312	0.0231478		1.93855	0.507635	0.420196	0.0205546		1.77942	0.448902	0.383577	0.0182519		0.06	1.92108	0.704607	0.12		0.3	0.329362	0.11324	0.008		80.1981	19.6945	0	0.107354	0.0290401	0.235071
1.15	1297.83	22.5	59.7443	14.5957	0	0.08	74.42		3.23777	1.05912	0.724433	0.0418967		2.29851	0.647655	0.503035	0.0260483		2.10982	0.572722	0.459196	0.0231302		1.93663	0.506459	0.419178	0.020539		1.77765	0.447862	0.382647	0.0182381		0.06	1.91939	0.704631	0.12		0.3	0.329244	0.113068	0.008		80.2799	19.6126	0	0.107498	0.0289205	0.234597
1.15	1298.26	22.6	59.725	14.515	0	0.08	74.32		3.23456	1.05666	0.722678	0.0418649		2.29623	0.646156	0.501816	0.0260285		2.10773	0.571396	0.458084	0.0231127		1.93471	0.505286	0.418162	0.0205234		1.77589	0.446825	0.38172	0.0182243		0.06	1.91771	0.704655	0.12		0.3	0.329126	0.112897	0.008		80.3619	19.5304	0	0.107643	0.0288011	0.234121
1.15	1298.7	22.7	59.7057	14.4343	0	0.08	74.22		3.23135	1.05422	0.720928	0.0418331		2.29395	0.64466	0.500601	0.0260088		2.10564	0.570073	0.456975	0.0230951		1.93279	0.504116	0.41715	0.0205079		1.77413	0.44579	0.380796	0.0182104		0.06	1.91604	0.704679	0.12		0.3	0.329008	0.112725	0.008		80.4442	19.448	0	0.107788	0.0286818	0.233644
1.15	1299.13	22.8	59.6864	14.3536	0	0.08	74.12		3.22815	1.05178	0.719184	0.0418014		2.29168	0.643169	0.49939	0.0259891		2.10356	0.568755	0.455869	0.0230776		1.93087	0.50295	0.41614	0.0204923		1.77237	0.444759	0.379874	0.0181966		0.06	1.91436	0.704703	0.12		0.3	0.32889	0.112555	0.008		80.5267	19.3654	0	0.107933	0.0285626	0.233165
1.15	1299.57	22.9	59.667	14.273	0	0.08	74.02		3.22496	1.04935	0.717444	0.0417698		2.28941	0.641682	0.498182	0.0259694		2.10147	0.56744	0.454766	0.0230602		1.92896	0.501787	0.415134	0.0204768		1.77061	0.443731	0.378955	0.0181829		0.06	1.91269	0.704727	0.12		0.3	0.328772	0.112384	0.008		80.6094	19.2826	0	0.108079	0.0284435	0.232686
1.15	1300	23	59.6477	14.1923	0	0.08	73.92		3.22176	1.04692	0.71571	0.0417382		2.28715	0.640199	0.496978	0.0259498		2.09939	0.566129	0.453667	0.0230427		1.92705	0.500628	0.41413	0.0204613		1.76886	0.442706	0.378039	0.0181691		0.06	1.91102	0.704751	0.12		0.3	0.328655	0.112214	0.008		80.6923	19.1995	0	0.108225	0.0283245	0.232204
1.15	1300.43	23.1	59.6284	14.1116	0	0.08	73.82		3.21858	1.04451	0.713981	0.0417066		2.28488	0.638721	0.495777	0.0259301		2.09732	0.564821	0.452571	0.0230253		1.92515	0.499472	0.41313	0.0204458		1.76711	0.441683	0.377126	0.0181554		0.06	1.90936	0.704775	0.12		0.3	0.328537	0.112044	0.008		80.7754	19.1162	0	0.108372	0.0282057	0.231722
1.15	1300.87	23.2	59.6091	14.0309	0	0.08	73.72		3.2154	1.0421	0.712257	0.0416751		2.28262	0.637246	0.49458	0.0259105		2.09524	0.563518	0.451478	0.0230079		1.92324	0.498319	0.412132	0.0204304		1.76536	0.440664	0.376216	0.0181416		0.06	1.90769	0.704799	0.12		0.3	0.32842	0.111874	0.008		80.8588	19.0327	0	0.108519	0.028087	0.231238
1.15	1301.3	23.3	59.5898	13.9502	0	0.08	73.62		3.21222	1.03969	0.710538	0.0416436		2.28037	0.635776	0.493387	0.025891		2.09317	0.562218	0.450389	0.0229905		1.92134	0.497169	0.411138	0.0204149		1.76362	0.439647	0.375308	0.0181279		0.06	1.90603	0.704823	0.12		0.3	0.328303	0.111705	0.008		80.9424	18.949	0	0.108666	0.0279684	0.230753
1.15	1301.74	23.4	59.5705	13.8695	0	0.08	73.52		3.20905	1.03729	0.708824	0.0416121		2.27812	0.634311	0.492197	0.0258714		2.09111	0.560921	0.449302	0.0229731		1.91945	0.496023	0.410146	0.0203995		1.76188	0.438634	0.374402	0.0181142		0.06	1.90437	0.704847	0.12		0.3	0.328186	0.111536	0.008		81.0262	18.865	0	0.108814	0.0278499	0.230266
1.15	1302.17	23.5	59.5511	13.7889	0	0.08	73.42		3.20588	1.0349	0.707116	0.0415807		2.27587	0.632849	0.49101	0.0258519		2.08904	0.559629	0.448219	0.0229558		1.91755	0.49488	0.409157	0.0203841		1.76014	0.437623	0.3735	0.0181006		0.06	1.90271	0.704871	0.12		0.3	0.328069	0.111368	0.008		81.1102	18.7808	0	0.108962	0.0277315	0.229778
1.15	1302.61	23.6	59.5318	13.7082	0	0.08	73.32		3.20272	1.03252	0.705412	0.0415494		2.27362	0.631392	0.489827	0.0258324		2.08698	0.55834	0.447139	0.0229385		1.91566	0.493741	0.408172	0.0203688		1.7584	0.436615	0.3726	0.0180869		0.06	1.90106	0.704894	0.12		0.3	0.327952	0.1112	0.008		81.1945	18.6964	0	0.109111	0.0276132	0.229289
1.15	1303.04	23.7	59.5125	13.6275	0	0.08	73.22		3.19956	1.03014	0.703714	0.0415181		2.27138	0.629938	0.488648	0.0258129		2.08492	0.557055	0.446063	0.0229212		1.91377	0.492604	0.407189	0.0203534		1.75667	0.43561	0.371703	0.0180733		0.06	1.8994	0.704918	0.12		0.3	0.327835	0.111032	0.008		81.279	18.6117	0	0.10926	0.027495	0.228798
1.15	1303.48	23.8	59.4932	13.5468	0	0.08	73.12		3.19641	1.02777	0.70202	0.0414868		2.26914	0.628489	0.487472	0.0257935		2.08287	0.555773	0.444989	0.0229039		1.91189	0.491471	0.406209	0.0203381		1.75494	0.434608	0.370808	0.0180597		0.06	1.89775	0.704942	0.12		0.3	0.327718	0.110864	0.008		81.3638	18.5268	0	0.109409	0.027377	0.228306
1.15	1303.91	23.9	59.4739	13.4661	0	0.08	73.02		3.19326	1.02541	0.700331	0.0414555		2.26691	0.627044	0.486299	0.025774		2.08082	0.554496	0.443919	0.0228867		1.91	0.490341	0.405232	0.0203228		1.75321	0.433609	0.369916	0.0180461		0.06	1.8961	0.704966	0.12		0.3	0.327602	0.110697	0.008		81.4487	18.4417	0	0.109559	0.0272591	0.227812
1.15	1304.35	24	59.4545	13.3855	0	0.08	72.92		3.19012	1.02305	0.698648	0.0414243		2.26468	0.625603	0.48513	0.0257546		2.07877	0.553221	0.442852	0.0228694		1.90812	0.489214	0.404258	0.0203075		1.75149	0.432612	0.369027	0.0180325		0.06	1.89446	0.70499	0.12		0.3	0.327485	0.110531	0.008		81.5339	18.3564	0	0.109709	0.0271412	0.227317
1.15	1304.78	24.1	59.4352	13.3048	0	0.08	72.82		3.18698	1.02071	0.696969	0.0413932		2.26245	0.624166	0.483965	0.0257353		2.07673	0.551951	0.441788	0.0228522		1.90625	0.48809	0.403287	0.0202922		1.74976	0.431619	0.368141	0.0180189		0.06	1.89281	0.705014	0.12		0.3	0.327369	0.110364	0.008		81.6194	18.2708	0	0.10986	0.0270235	0.226821
1.15	1305.22	24.2	59.4159	13.2241	0	0.08	72.72		3.18385	1.01836	0.695296	0.0413621		2.26023	0.622734	0.482803	0.0257159		2.07468	0.550684	0.440727	0.0228351		1.90437	0.48697	0.402318	0.0202769		1.74804	0.430628	0.367257	0.0180054		0.06	1.89117	0.705037	0.12		0.3	0.327253	0.110198	0.008		81.705	18.1849	0	0.110011	0.0269059	0.226323
1.15	1305.65	24.3	59.3966	13.1434	0	0.08	72.62		3.18072	1.01603	0.693627	0.041331		2.25801	0.621305	0.481644	0.0256966		2.07265	0.54942	0.439669	0.0228179		1.9025	0.485853	0.401353	0.0202617		1.74632	0.42964	0.366375	0.0179918		0.06	1.88953	0.705061	0.12		0.3	0.327136	0.110032	0.008		81.791	18.0989	0	0.110162	0.0267884	0.225823
1.15	1306.09	24.4	59.3773	13.0627	0	0.08	72.52		3.17759	1.0137	0.691963	0.0412999		2.25579	0.61988	0.480489	0.0256773		2.07061	0.548161	0.438615	0.0228008		1.90063	0.484739	0.40039	0.0202465		1.74461	0.428655	0.365496	0.0179783		0.06	1.8879	0.705085	0.12		0.3	0.32702	0.109867	0.008		81.8771	18.0126	0	0.110314	0.026671	0.225323
1.15	1306.52	24.5	59.358	12.982	0	0.08	72.42		3.17447	1.01137	0.690304	0.0412689		2.25357	0.61846	0.479337	0.025658		2.06858	0.546905	0.437563	0.0227836		1.89877	0.483628	0.39943	0.0202313		1.7429	0.427673	0.36462	0.0179648		0.06	1.88626	0.705109	0.12		0.3	0.326904	0.109702	0.008		81.9635	17.9261	0	0.110467	0.0265537	0.224821
1.15	1306.96	24.6	59.3386	12.9014	0	0.08	72.32		3.17136	1.00906	0.68865	0.041238		2.25136	0.617043	0.478188	0.0256388		2.06655	0.545652	0.436515	0.0227666		1.89691	0.48252	0.398473	0.0202161		1.74119	0.426693	0.363747	0.0179514		0.06	1.88463	0.705132	0.12		0.3	0.326788	0.109537	0.008		82.0501	17.8393	0	0.110619	0.0264365	0.224317
1.15	1307.39	24.7	59.3193	12.8207	0	0.08	72.22		3.16825	1.00675	0.687001	0.0412071		2.24916	0.615631	0.477043	0.0256196		2.06452	0.544403	0.435469	0.0227495		1.89505	0.481416	0.397519	0.0202009		1.73948	0.425716	0.362875	0.0179379		0.06	1.883	0.705156	0.12		0.3	0.326673	0.109373	0.008		82.137	17.7523	0	0.110773	0.0263194	0.223812
1.15	1307.83	24.8	59.3	12.74	0	0.08	72.12		3.16515	1.00444	0.685357	0.0411762		2.24695	0.614222	0.475901	0.0256004		2.0625	0.543157	0.434427	0.0227324		1.89319	0.480314	0.396567	0.0201858		1.73778	0.424742	0.362007	0.0179245		0.06	1.88137	0.70518	0.12		0.3	0.326557	0.109209	0.008		82.2241	17.665	0	0.110926	0.0262025	0.223305
1.15	1308.26	24.9	59.2807	12.6593	0	0.08	72.02		3.16205	1.00215	0.683718	0.0411453		2.24475	0.612818	0.474763	0.0255812		2.06048	0.541915	0.433388	0.0227154		1.89133	0.479216	0.395619	0.0201707		1.73607	0.423771	0.361141	0.017911		0.06	1.87975	0.705204	0.12		0.3	0.326442	0.109045	0.008		82.3114	17.5775	0	0.11108	0.0260856	0.222798
1.15	1308.7	25	59.2614	12.5786	0	0.08	71.92		3.15895	0.999857	0.682083	0.0411146		2.24255	0.611417	0.473628	0.025562		2.05846	0.540677	0.432352	0.0226984		1.88948	0.478121	0.394673	0.0201556		1.73438	0.422803	0.360278	0.0178976		0.06	1.87813	0.705227	0.12		0.3	0.326326	0.108882	0.008		82.399	17.4898	0	0.111235	0.0259688	0.222288
1.15	1309.13	25.1	59.242	12.498	0	0.08	71.82		3.15586	0.997573	0.680453	0.0410838		2.24036	0.610021	0.472496	0.0255429		2.05645	0.539442	0.431319	0.0226814		1.88763	0.477029	0.39373	0.0201405		1.73268	0.421837	0.359417	0.0178842		0.06	1.87651	0.705251	0.12		0.3	0.326211	0.108719	0.008		82.4868	17.4018	0	0.11139	0.0258521	0.221777
1.15	1309.57	25.2	59.2227	12.4173	0	0.08	71.72		3.15278	0.995296	0.678828	0.0410531		2.23817	0.608628	0.471368	0.0255238		2.05444	0.53821	0.430289	0.0226645		1.88579	0.47594	0.39279	0.0201255		1.73098	0.420874	0.358558	0.0178709		0.06	1.87489	0.705275	0.12		0.3	0.326096	0.108556	0.008		82.5749	17.3135	0	0.111545	0.0257355	0.221265
1.15	1310	25.3	59.2034	12.3366	0	0.08	71.62		3.1497	0.993025	0.677208	0.0410224		2.23598	0.60724	0.470243	0.0255047		2.05243	0.536983	0.429262	0.0226475		1.88395	0.474854	0.391852	0.0201104		1.72929	0.419914	0.357703	0.0178575		0.06	1.87327	0.705298	0.12		0.3	0.32598	0.108394	0.008		82.6632	17.2251	0	0.111701	0.0256191	0.220751
1.15	1310.43	25.4	59.1841	12.2559	0	0.08	71.52		3.14662	0.990761	0.675593	0.0409918		2.2338	0.605855	0.469121	0.0254857		2.05043	0.535758	0.428238	0.0226306		1.88211	0.473771	0.390917	0.0200954		1.7276	0.418956	0.356849	0.0178442		0.06	1.87166	0.705322	0.12		0.3	0.325865	0.108232	0.008		82.7518	17.1363	0	0.111857	0.0255027	0.220236
1.15	1310.87	25.5	59.1648	12.1752	0	0.08	71.42		3.14355	0.988502	0.673982	0.0409612		2.23162	0.604474	0.468003	0.0254667		2.04842	0.534537	0.427217	0.0226137		1.88027	0.472691	0.389985	0.0200804		1.72592	0.418001	0.355999	0.0178309		0.06	1.87005	0.705346	0.12		0.3	0.32575	0.10807	0.008		82.8406	17.0474	0	0.112013	0.0253864	0.219719
1.15	1311.3	25.6	59.1455	12.0945	0	0.08	71.32		3.14048	0.986251	0.672376	0.0409306		2.22944	0.603097	0.466887	0.0254477		2.04643	0.533319	0.426199	0.0225969		1.87843	0.471615	0.389056	0.0200654		1.72423	0.417049	0.35515	0.0178176		0.06	1.86844	0.705369	0.12		0.3	0.325636	0.107909	0.008		82.9297	16.9581	0	0.11217	0.0252702	0.2192
1.15	1311.74	25.7	59.1261	12.0139	0	0.08	71.22		3.13742	0.984006	0.670775	0.0409001		2.22727	0.601724	0.465775	0.0254287		2.04443	0.532105	0.425184	0.02258		1.8766	0.470541	0.388129	0.0200505		1.72255	0.4161	0.354304	0.0178043		0.06	1.86683	0.705393	0.12		0.3	0.325521	0.107748	0.008		83.019	16.8687	0	0.112328	0.0251541	0.218681
1.15	1312.17	25.8	59.1068	11.9332	0	0.08	71.12		3.13436	0.981767	0.669178	0.0408696		2.2251	0.600355	0.464667	0.0254098		2.04244	0.530895	0.424172	0.0225632		1.87477	0.46947	0.387206	0.0200355		1.72087	0.415153	0.353461	0.017791		0.06	1.86523	0.705416	0.12		0.3	0.325406	0.107587	0.008		83.1086	16.7789	0	0.112486	0.0250381	0.218159
1.15	1312.61	25.9	59.0875	11.8525	0	0.08	71.02		3.13131	0.979534	0.667586	0.0408392		2.22293	0.59899	0.463561	0.0253908		2.04045	0.529687	0.423162	0.0225464		1.87295	0.468403	0.386284	0.0200206		1.7192	0.414209	0.35262	0.0177778		0.06	1.86363	0.70544	0.12		0.3	0.325292	0.107427	0.008		83.1984	16.689	0	0.112644	0.0249222	0.217636
1.15	1313.04	26	59.0682	11.7718	0	0.08	70.92		3.12826	0.977308	0.665999	0.0408088		2.22077	0.597629	0.462459	0.0253719		2.03846	0.528483	0.422156	0.0225296		1.87113	0.467338	0.385366	0.0200057		1.71752	0.413268	0.351782	0.0177645		0.06	1.86203	0.705464	0.12		0.3	0.325177	0.107266	0.008		83.2885	16.5987	0	0.112803	0.0248064	0.217112
1.15	1313.48	26.1	59.0489	11.6911	0	0.08	70.82		3.12522	0.975088	0.664416	0.0407784		2.21861	0.596271	0.46136	0.0253531		2.03648	0.527283	0.421153	0.0225128		1.8693	0.466277	0.38445	0.0199908		1.71585	0.412329	0.350946	0.0177513		0.06	1.86043	0.705487	0.12		0.3	0.325063	0.107107	0.008		83.3788	16.5082	0	0.112962	0.0246906	0.216586
1.15	1313.91	26.2	59.0295	11.6105	0	0.08	70.72		3.12218	0.972874	0.662838	0.0407481		2.21645	0.594917	0.460264	0.0253342		2.0345	0.526086	0.420153	0.0224961		1.86749	0.465218	0.383537	0.0199759		1.71418	0.411393	0.350112	0.0177381		0.06	1.85883	0.705511	0.12		0.3	0.324949	0.106947	0.008		83.4694	16.4175	0	0.113122	0.024575	0.216058
1.15	1314.35	26.3	59.0102	11.5298	0	0.08	70.62		3.11914	0.970666	0.661265	0.0407178		2.21429	0.593567	0.459172	0.0253154		2.03252	0.524892	0.419156	0.0224794		1.86567	0.464162	0.382627	0.0199611		1.71252	0.410459	0.349281	0.0177249		0.06	1.85724	0.705534	0.12		0.3	0.324835	0.106788	0.008		83.5602	16.3265	0	0.113282	0.0244594	0.215529
1.15	1314.78	26.4	58.9909	11.4491	0	0.08	70.52		3.11611	0.968465	0.659696	0.0406876		2.21214	0.592221	0.458082	0.0252966		2.03055	0.523702	0.418161	0.0224627		1.86386	0.46311	0.381719	0.0199463		1.71086	0.409528	0.348453	0.0177118		0.06	1.85565	0.705558	0.12		0.3	0.324721	0.106629	0.008		83.6513	16.2352	0	0.113443	0.024344	0.214999
1.15	1315.22	26.5	58.9716	11.3684	0	0.08	70.42		3.11309	0.96627	0.658131	0.0406573		2.21	0.590879	0.456996	0.0252778		2.02858	0.522515	0.41717	0.022446		1.86205	0.46206	0.380814	0.0199315		1.70919	0.4086	0.347626	0.0176986		0.06	1.85406	0.705581	0.12		0.3	0.324607	0.106471	0.008		83.7427	16.1437	0	0.113604	0.0242286	0.214466
1.15	1315.65	26.6	58.9523	11.2877	0	0.08	70.32		3.11007	0.964081	0.656572	0.0406272		2.20785	0.58954	0.455913	0.025259		2.02661	0.521331	0.416181	0.0224294		1.86024	0.461013	0.379911	0.0199167		1.70754	0.407674	0.346802	0.0176855		0.06	1.85247	0.705605	0.12		0.3	0.324493	0.106313	0.008		83.8343	16.0519	0	0.113766	0.0241133	0.213933
1.15	1316.09	26.7	58.933	11.207	0	0.08	70.22		3.10705	0.961898	0.655017	0.0405971		2.20571	0.588205	0.454833	0.0252403		2.02464	0.520151	0.415195	0.0224127		1.85844	0.459969	0.379011	0.0199019		1.70588	0.406751	0.345981	0.0176724		0.06	1.85089	0.705628	0.12		0.3	0.32438	0.106155	0.008		83.9262	15.9599	0	0.113928	0.0239981	0.213397
1.15	1316.52	26.8	58.9136	11.1264	0	0.08	70.12		3.10404	0.959721	0.653466	0.040567		2.20357	0.586874	0.453757	0.0252216		2.02268	0.518973	0.414212	0.0223961		1.85664	0.458929	0.378114	0.0198872		1.70423	0.405831	0.345162	0.0176593		0.06	1.84931	0.705652	0.12		0.3	0.324266	0.105998	0.008		84.0183	15.8676	0	0.11409	0.023883	0.21286
1.15	1316.96	26.9	58.8943	11.0457	0	0.08	70.02		3.10103	0.957551	0.65192	0.0405369		2.20144	0.585547	0.452683	0.0252029		2.02072	0.5178	0.413232	0.0223795		1.85484	0.457891	0.37722	0.0198724		1.70258	0.404913	0.344345	0.0176462		0.06	1.84773	0.705675	0.12		0.3	0.324152	0.105841	0.008		84.1107	15.775	0	0.114253	0.023768	0.212322
1.15	1317.39	27	58.875	10.965	0	0.08	69.92		3.09803	0.955386	0.650378	0.0405069		2.19931	0.584223	0.451613	0.0251843		2.01877	0.516629	0.412255	0.0223629		1.85304	0.456856	0.376328	0.0198577		1.70093	0.403998	0.343531	0.0176331		0.06	1.84615	0.705699	0.12		0.3	0.324039	0.105684	0.008		84.2034	15.6822	0	0.114416	0.0236531	0.211782
1.15	1317.83	27.1	58.8557	10.8843	0	0.08	69.82		3.09503	0.953228	0.648841	0.0404769		2.19718	0.582904	0.450545	0.0251656		2.01681	0.515462	0.411281	0.0223464		1.85125	0.455823	0.375438	0.019843		1.69928	0.403085	0.342719	0.0176201		0.06	1.84457	0.705722	0.12		0.3	0.323926	0.105527	0.008		84.2963	15.5891	0	0.11458	0.0235382	0.21124
1.15	1318.26	27.2	58.8364	10.8036	0	0.08	69.72		3.09204	0.951075	0.647309	0.040447		2.19505	0.581587	0.449481	0.025147		2.01486	0.514298	0.410309	0.0223299		1.84946	0.454794	0.374551	0.0198283		1.69764	0.402175	0.34191	0.017607		0.06	1.843	0.705745	0.12		0.3	0.323813	0.105371	0.008		84.3895	15.4957	0	0.114745	0.0234234	0.210697
1.15	1318.7	27.3	58.817	10.723	0	0.08	69.62		3.08905	0.948929	0.64578	0.0404171		2.19293	0.580275	0.44842	0.0251284		2.01291	0.513138	0.409341	0.0223134		1.84767	0.453768	0.373667	0.0198137		1.696	0.401267	0.341102	0.017594		0.06	1.84143	0.705769	0.12		0.3	0.3237	0.105215	0.008		84.483	15.4021	0	0.11491	0.0233087	0.210152
1.15	1319.13	27.4	58.7977	10.6423	0	0.08	69.52		3.08607	0.946789	0.644257	0.0403872		2.19081	0.578966	0.447362	0.0251099		2.01097	0.51198	0.408375	0.0222969		1.84589	0.452744	0.372785	0.019799		1.69436	0.400362	0.340298	0.017581		0.06	1.83986	0.705792	0.12		0.3	0.323587	0.10506	0.008		84.5767	15.3082	0	0.115075	0.0231941	0.209605
1.15	1319.57	27.5	58.7784	10.5616	0	0.08	69.42		3.08309	0.944654	0.642737	0.0403574		2.1887	0.577661	0.446307	0.0250913		2.00903	0.510826	0.407412	0.0222804		1.84411	0.451724	0.371906	0.0197844		1.69272	0.39946	0.339495	0.017568		0.06	1.83829	0.705816	0.12		0.3	0.323474	0.104904	0.008		84.6707	15.214	0	0.115241	0.0230796	0.209057
1.15	1320	27.6	58.7591	10.4809	0	0.08	69.32		3.08011	0.942526	0.641222	0.0403276		2.18659	0.576359	0.445255	0.0250728		2.00709	0.509675	0.406451	0.022264		1.84233	0.450706	0.37103	0.0197698		1.69109	0.39856	0.338695	0.0175551		0.06	1.83673	0.705839	0.12		0.3	0.323361	0.104749	0.008		84.765	15.1196	0	0.115407	0.0229651	0.208507
1.15	1320.43	27.7	58.7398	10.4002	0	0.08	69.22		3.07714	0.940404	0.639712	0.0402979		2.18448	0.575062	0.444206	0.0250543		2.00515	0.508527	0.405494	0.0222476		1.84055	0.449691	0.370156	0.0197552		1.68946	0.397662	0.337897	0.0175421		0.06	1.83517	0.705862	0.12		0.3	0.323248	0.104595	0.008		84.8595	15.0249	0	0.115574	0.0228507	0.207956
1.15	1320.87	27.8	58.7205	10.3195	0	0.08	69.12		3.07418	0.938287	0.638206	0.0402682		2.18237	0.573767	0.44316	0.0250358		2.00322	0.507383	0.404539	0.0222312		1.83878	0.448679	0.369284	0.0197407		1.68783	0.396767	0.337101	0.0175292		0.06	1.83361	0.705886	0.12		0.3	0.323136	0.10444	0.008		84.9544	14.9299	0	0.115741	0.0227364	0.207403
1.15	1321.3	27.9	58.7011	10.2389	0	0.08	69.02		3.07121	0.936177	0.636704	0.0402385		2.18027	0.572477	0.442117	0.0250174		2.00129	0.506242	0.403587	0.0222148		1.837	0.44767	0.368415	0.0197261		1.6862	0.395875	0.336308	0.0175163		0.06	1.83205	0.705909	0.12		0.3	0.323023	0.104286	0.008		85.0495	14.8346	0	0.115908	0.0226222	0.206848
1.15	1321.74	28	58.6818	10.1582	0	0.08	68.92		3.06826	0.934072	0.635207	0.0402089		2.17817	0.57119	0.441078	0.024999		1.99936	0.505103	0.402638	0.0221984		1.83524	0.446663	0.367549	0.0197116		1.68458	0.394985	0.335517	0.0175034		0.06	1.83049	0.705932	0.12		0.3	0.322911	0.104133	0.008		85.1448	14.7391	0	0.116077	0.022508	0.206291
1.15	1322.17	28.1	58.6625	10.0775	0	0.08	68.82		3.0653	0.931973	0.633713	0.0401793		2.17607	0.569906	0.440041	0.0249806		1.99744	0.503969	0.401692	0.0221821		1.83347	0.44566	0.366685	0.0196971		1.68296	0.394097	0.334729	0.0174905		0.06	1.82894	0.705956	0.12		0.3	0.322799	0.103979	0.008		85.2405	14.6433	0	0.116245	0.022394	0.205733
1.15	1322.61	28.2	58.6432	9.99682	0	0.08	68.72		3.06236	0.92988	0.632225	0.0401498		2.17398	0.568626	0.439007	0.0249622		1.99552	0.502837	0.400748	0.0221658		1.83171	0.444659	0.365823	0.0196826		1.68134	0.393212	0.333942	0.0174776		0.06	1.82739	0.705979	0.12		0.3	0.322686	0.103826	0.008		85.3364	14.5472	0	0.116414	0.0222799	0.205174
1.15	1323.04	28.3	58.6239	9.91614	0	0.08	68.62		3.05941	0.927793	0.63074	0.0401203		2.17189	0.56735	0.437976	0.0249439		1.9936	0.501708	0.399807	0.0221495		1.82995	0.443661	0.364964	0.0196682		1.67972	0.39233	0.333158	0.0174648		0.06	1.82584	0.706002	0.12		0.3	0.322574	0.103674	0.008		85.4326	14.4508	0	0.116584	0.022166	0.204612
1.15	1323.48	28.4	58.6045	9.83545	0	0.08	68.52		3.05647	0.925712	0.62926	0.0400908		2.1698	0.566077	0.436948	0.0249255		1.99168	0.500583	0.398869	0.0221332		1.82819	0.442666	0.364108	0.0196537		1.67811	0.39145	0.332376	0.017452		0.06	1.82429	0.706026	0.12		0.3	0.322462	0.103521	0.008		85.5291	14.3541	0	0.116754	0.0220521	0.204049
1.15	1323.91	28.5	58.5852	9.75477	0	0.08	68.42		3.05354	0.923636	0.627784	0.0400613		2.16772	0.564808	0.435924	0.0249072		1.98977	0.49946	0.397933	0.022117		1.82643	0.441673	0.363254	0.0196393		1.6765	0.390572	0.331597	0.0174392		0.06	1.82275	0.706049	0.12		0.3	0.322351	0.103369	0.008		85.6259	14.2572	0	0.116925	0.0219384	0.203484
1.15	1324.35	28.6	58.5659	9.67409	0	0.08	68.32		3.05061	0.921567	0.626312	0.0400319		2.16564	0.563543	0.434902	0.024889		1.98786	0.498341	0.397001	0.0221007		1.82468	0.440684	0.362402	0.0196249		1.67489	0.389697	0.330819	0.0174264		0.06	1.8212	0.706072	0.12		0.3	0.322239	0.103217	0.008		85.7229	14.16	0	0.117096	0.0218246	0.202917
1.15	1324.78	28.7	58.5466	9.59341	0	0.08	68.22		3.04768	0.919503	0.624845	0.0400026		2.16356	0.562281	0.433883	0.0248707		1.98596	0.497225	0.39607	0.0220845		1.82293	0.439697	0.361553	0.0196105		1.67328	0.388824	0.330044	0.0174136		0.06	1.81966	0.706095	0.12		0.3	0.322127	0.103066	0.008		85.8203	14.0625	0	0.117268	0.021711	0.202349
1.15	1325.22	28.8	58.5273	9.51273	0	0.08	68.12		3.04476	0.917445	0.623382	0.0399732		2.16149	0.561022	0.432867	0.0248525		1.98405	0.496112	0.395143	0.0220683		1.82118	0.438712	0.360707	0.0195961		1.67168	0.387954	0.329272	0.0174008		0.06	1.81812	0.706119	0.12		0.3	0.322016	0.102914	0.008		85.9179	13.9647	0	0.11744	0.0215974	0.201779
1.15	1325.65	28.9	58.508	9.43205	0	0.08	68.02		3.04184	0.915392	0.621923	0.039944		2.15942	0.559767	0.431854	0.0248343		1.98215	0.495002	0.394218	0.0220522		1.81944	0.437731	0.359863	0.0195817		1.67008	0.387086	0.328501	0.0173881		0.06	1.81659	0.706142	0.12		0.3	0.321904	0.102763	0.008		86.0158	13.8666	0	0.117612	0.0214839	0.201207
1.15	1326.09	29	58.4886	9.35136	0	0.08	67.92		3.03893	0.913345	0.620468	0.0399147		2.15735	0.558515	0.430844	0.0248161		1.98025	0.493895	0.393296	0.022036		1.81769	0.436752	0.359021	0.0195674		1.66848	0.38622	0.327733	0.0173753		0.06	1.81505	0.706165	0.12		0.3	0.321793	0.102613	0.008		86.114	13.7682	0	0.117786	0.0213704	0.200634
1.15	1326.52	29.1	58.4693	9.27068	0	0.08	67.82		3.03602	0.911304	0.619018	0.0398855		2.15528	0.557267	0.429836	0.0247979		1.97836	0.492792	0.392377	0.0220199		1.81595	0.435776	0.358181	0.0195531		1.66688	0.385357	0.326966	0.0173626		0.06	1.81352	0.706188	0.12		0.3	0.321681	0.102462	0.008		86.2125	13.6695	0	0.117959	0.021257	0.200058
1.15	1326.96	29.2	58.45	9.19	0	0.08	67.72		3.03312	0.909269	0.617571	0.0398563		2.15322	0.556022	0.428832	0.0247798		1.97646	0.491691	0.39146	0.0220038		1.81422	0.434803	0.357345	0.0195388		1.66529	0.384496	0.326202	0.0173499		0.06	1.81199	0.706211	0.12		0.3	0.32157	0.102312	0.008		86.3113	13.5706	0	0.118133	0.0211437	0.199481
1.15	1327.39	29.3	58.4307	9.10932	0	0.08	67.62		3.03022	0.907239	0.616129	0.0398272		2.15116	0.554781	0.427831	0.0247616		1.97457	0.490593	0.390546	0.0219877		1.81248	0.433832	0.35651	0.0195245		1.66369	0.383638	0.325441	0.0173372		0.06	1.81046	0.706235	0.12		0.3	0.321459	0.102163	0.008		86.4104	13.4713	0	0.118308	0.0210304	0.198903
1.15	1327.83	29.4	58.4114	9.02864	0	0.08	67.52		3.02732	0.905215	0.614691	0.0397981		2.14911	0.553543	0.426832	0.0247436		1.97269	0.489499	0.389634	0.0219716		1.81075	0.432864	0.355678	0.0195102		1.6621	0.382782	0.324681	0.0173246		0.06	1.80894	0.706258	0.12		0.3	0.321348	0.102013	0.008		86.5097	13.3718	0	0.118483	0.0209172	0.198322
1.15	1328.26	29.5	58.392	8.94795	0	0.08	67.42		3.02443	0.903196	0.613257	0.039769		2.14706	0.552309	0.425836	0.0247255		1.9708	0.488407	0.388725	0.0219556		1.80902	0.431899	0.354848	0.019496		1.66052	0.381929	0.323924	0.0173119		0.06	1.80741	0.706281	0.12		0.3	0.321237	0.101864	0.008		86.6094	13.272	0	0.118659	0.0208041	0.19774
1.15	1328.7	29.6	58.3727	8.86727	0	0.08	67.32		3.02154	0.901183	0.611827	0.03974		2.14501	0.551078	0.424843	0.0247074		1.96892	0.487319	0.387819	0.0219395		1.80729	0.430936	0.354021	0.0194817		1.65893	0.381077	0.323168	0.0172993		0.06	1.80589	0.706304	0.12		0.3	0.321127	0.101715	0.008		86.7093	13.1718	0	0.118835	0.020691	0.197156
1.15	1329.13	29.7	58.3534	8.78659	0	0.08	67.22		3.01866	0.899176	0.610402	0.039711		2.14296	0.549851	0.423853	0.0246894		1.96704	0.486233	0.386915	0.0219235		1.80557	0.429977	0.353196	0.0194675		1.65735	0.380229	0.322415	0.0172866		0.06	1.80437	0.706327	0.12		0.3	0.321016	0.101567	0.008		86.8096	13.0714	0	0.119012	0.020578	0.19657
1.15	1329.57	29.8	58.3341	8.70591	0	0.08	67.12		3.01578	0.897174	0.60898	0.039682		2.14092	0.548627	0.422866	0.0246714		1.96517	0.485151	0.386014	0.0219076		1.80385	0.429019	0.352373	0.0194533		1.65577	0.379382	0.321664	0.017274		0.06	1.80286	0.70635	0.12		0.3	0.320905	0.101419	0.008		86.9101	12.9707	0	0.11919	0.020465	0.195982
1.15	1330	29.9	58.3148	8.62523	0	0.08	67.02		3.01291	0.895178	0.607563	0.0396531		2.13888	0.547406	0.421882	0.0246534		1.9633	0.484071	0.385116	0.0218916		1.80213	0.428065	0.351553	0.0194392		1.65419	0.378538	0.320916	0.0172615		0.06	1.80134	0.706373	0.12		0.3	0.320795	0.101271	0.008		87.011	12.8696	0	0.119367	0.0203521	0.195392
1.15	1330.43	30	58.2955	8.54455	0	0.08	66.92		3.01004	0.893187	0.606149	0.0396242		2.13684	0.546188	0.420901	0.0246355		1.96143	0.482995	0.38422	0.0218756		1.80041	0.427113	0.350735	0.019425		1.65262	0.377696	0.320169	0.0172489		0.06	1.79983	0.706397	0.12		0.3	0.320685	0.101123	0.008		87.1122	12.7683	0	0.119546	0.0202393	0.194801
1.15	1330.87	30.1	58.2761	8.46386	0	0.08	66.82		3.00717	0.891202	0.60474	0.0395954		2.13481	0.544974	0.419922	0.0246175		1.95956	0.481921	0.383326	0.0218597		1.7987	0.426163	0.34992	0.0194109		1.65104	0.376857	0.319425	0.0172363		0.06	1.79832	0.70642	0.12		0.3	0.320574	0.100976	0.008		87.2136	12.6667	0	0.119725	0.0201265	0.194208
1.15	1331.3	30.2	58.2568	8.38318	0	0.08	66.72		3.00431	0.889222	0.603334	0.0395666		2.13277	0.543764	0.418946	0.0245996		1.95769	0.480851	0.382435	0.0218438		1.79699	0.425217	0.349107	0.0193967		1.64947	0.376019	0.318682	0.0172238		0.06	1.79681	0.706443	0.12		0.3	0.320464	0.100829	0.008		87.3154	12.5647	0	0.119904	0.0200138	0.193613
1.15	1331.74	30.3	58.2375	8.3025	0	0.08	66.62		3.00145	0.887248	0.601933	0.0395378		2.13075	0.542557	0.417973	0.0245817		1.95583	0.479783	0.381547	0.0218279		1.79528	0.424273	0.348296	0.0193826		1.6479	0.375185	0.317942	0.0172113		0.06	1.7953	0.706466	0.12		0.3	0.320354	0.100682	0.008		87.4174	12.4625	0	0.120084	0.0199011	0.193016
1.15	1332.17	30.4	58.2182	8.22182	0	0.08	66.52		2.9986	0.885279	0.600536	0.0395091		2.12872	0.541353	0.417003	0.0245639		1.95397	0.478719	0.380661	0.0218121		1.79357	0.423331	0.347487	0.0193685		1.64634	0.374352	0.317204	0.0171987		0.06	1.79379	0.706489	0.12		0.3	0.320244	0.100535	0.008		87.5198	12.3599	0	0.120265	0.0197885	0.192417
1.15	1332.61	30.5	58.1989	8.14114	0	0.08	66.42		2.99575	0.883316	0.599142	0.0394804		2.1267	0.540152	0.416035	0.024546		1.95212	0.477657	0.379778	0.0217962		1.79187	0.422392	0.346681	0.0193545		1.64477	0.373522	0.316468	0.0171863		0.06	1.79229	0.706512	0.12		0.3	0.320134	0.100389	0.008		87.6225	12.2571	0	0.120446	0.0196759	0.191817
1.15	1333.04	30.6	58.1795	8.06045	0	0.08	66.32		2.99291	0.881358	0.597753	0.0394517		2.12468	0.538955	0.41507	0.0245282		1.95026	0.476598	0.378898	0.0217804		1.79017	0.421456	0.345877	0.0193404		1.64321	0.372694	0.315734	0.0171738		0.06	1.79079	0.706535	0.12		0.3	0.320024	0.100243	0.008		87.7255	12.1539	0	0.120627	0.0195634	0.191214
1.15	1333.48	30.7	58.1602	7.97977	0	0.08	66.22		2.99007	0.879405	0.596368	0.0394231		2.12266	0.537761	0.414108	0.0245104		1.94841	0.475542	0.378019	0.0217646		1.78847	0.420522	0.345075	0.0193264		1.64165	0.371868	0.315003	0.0171613		0.06	1.78929	0.706558	0.12		0.3	0.319915	0.100098	0.008		87.8288	12.0504	0	0.120809	0.0194509	0.19061
1.15	1333.91	30.8	58.1409	7.89909	0	0.08	66.12		2.98723	0.877458	0.594986	0.0393945		2.12065	0.53657	0.413149	0.0244926		1.94657	0.474489	0.377144	0.0217488		1.78677	0.419591	0.344276	0.0193124		1.6401	0.371045	0.314273	0.0171489		0.06	1.7878	0.706581	0.12		0.3	0.319805	0.0999526	0.008		87.9324	11.9466	0	0.120992	0.0193385	0.190004
1.15	1334.35	30.9	58.1216	7.81841	0	0.08	66.02		2.9844	0.875516	0.593609	0.0393659		2.11864	0.535382	0.412193	0.0244749		1.94472	0.473439	0.376271	0.0217331		1.78508	0.418663	0.343479	0.0192984		1.63854	0.370224	0.313545	0.0171364		0.06	1.7863	0.706604	0.12		0.3	0.319695	0.0998076	0.008		88.0363	11.8425	0	0.121175	0.0192261	0.189396
1.15	1334.78	31	58.1023	7.73773	0	0.08	65.92		2.98158	0.87358	0.592235	0.0393374		2.11663	0.534198	0.411239	0.0244572		1.94288	0.472392	0.3754	0.0217173		1.78339	0.417737	0.342684	0.0192844		1.63699	0.369405	0.31282	0.017124		0.06	1.78481	0.706627	0.12		0.3	0.319586	0.0996629	0.008		88.1406	11.7381	0	0.121359	0.0191138	0.188786
1.15	1335.22	31.1	58.083	7.65705	0	0.08	65.82		2.97875	0.871648	0.590866	0.0393089		2.11463	0.533017	0.410288	0.0244395		1.94104	0.471348	0.374532	0.0217016		1.7817	0.416813	0.341892	0.0192704		1.63544	0.368588	0.312096	0.0171116		0.06	1.78332	0.70665	0.12		0.3	0.319477	0.0995184	0.008		88.2451	11.6333	0	0.121544	0.0190015	0.188174
1.15	1335.65	31.2	58.0636	7.57636	0	0.08	65.72		2.97593	0.869722	0.5895	0.0392805		2.11263	0.53184	0.40934	0.0244218		1.9392	0.470306	0.373666	0.0216859		1.78001	0.415892	0.341102	0.0192565		1.63389	0.367774	0.311375	0.0170992		0.06	1.78183	0.706673	0.12		0.3	0.319367	0.0993743	0.008		88.35	11.5282	0	0.121729	0.0188893	0.18756
1.15	1336.09	31.3	58.0443	7.49568	0	0.08	65.62		2.97312	0.867802	0.588138	0.0392521		2.11063	0.530665	0.408394	0.0244041		1.93737	0.469268	0.372803	0.0216702		1.77833	0.414974	0.340314	0.0192426		1.63235	0.366962	0.310656	0.0170869		0.06	1.78034	0.706696	0.12		0.3	0.319258	0.0992305	0.008		88.4552	11.4229	0	0.121914	0.0187771	0.186944
1.15	1336.52	31.4	58.025	7.415	0	0.08	65.52		2.97031	0.865887	0.58678	0.0392237		2.10864	0.529494	0.407451	0.0243865		1.93554	0.468232	0.371942	0.0216545		1.77665	0.414058	0.339528	0.0192286		1.6308	0.366152	0.309938	0.0170745		0.06	1.77886	0.706719	0.12		0.3	0.319149	0.0990869	0.008		88.5607	11.3172	0	0.1221	0.018665	0.186327
1.15	1336.96	31.5	58.0057	7.33432	0	0.08	65.42		2.9675	0.863977	0.585426	0.0391954		2.10664	0.528326	0.406511	0.0243688		1.93371	0.467199	0.371084	0.0216389		1.77497	0.413144	0.338744	0.0192148		1.62926	0.365344	0.309223	0.0170622		0.06	1.77738	0.706741	0.12		0.3	0.31904	0.0989436	0.008		88.6666	11.2111	0	0.122287	0.0185529	0.185707
1.15	1337.39	31.6	57.9864	7.25364	0	0.08	65.32		2.9647	0.862072	0.584076	0.0391671		2.10465	0.527161	0.405573	0.0243512		1.93188	0.466169	0.370228	0.0216233		1.77329	0.412234	0.337963	0.0192009		1.62772	0.364538	0.30851	0.0170499		0.06	1.7759	0.706764	0.12		0.3	0.318932	0.0988006	0.008		88.7728	11.1048	0	0.122474	0.0184408	0.185085
1.15	1337.83	31.7	57.967	7.17295	0	0.08	65.22		2.9619	0.860172	0.582729	0.0391388		2.10267	0.526	0.404638	0.0243337		1.93006	0.465142	0.369375	0.0216077		1.77162	0.411325	0.337184	0.019187		1.62619	0.363735	0.307799	0.0170376		0.06	1.77442	0.706787	0.12		0.3	0.318823	0.0986579	0.008		88.8792	10.9981	0	0.122662	0.0183288	0.184462
1.15	1338.26	31.8	57.9477	7.09227	0	0.08	65.12		2.95911	0.858278	0.581387	0.0391106		2.10068	0.524841	0.403706	0.0243161		1.92824	0.464117	0.368524	0.0215921		1.76995	0.410419	0.336407	0.0191732		1.62465	0.362934	0.30709	0.0170253		0.06	1.77294	0.70681	0.12		0.3	0.318714	0.0985155	0.008		88.9861	10.8911	0	0.12285	0.0182168	0.183836
1.15	1338.7	31.9	57.9284	7.01159	0	0.08	65.02		2.95632	0.856389	0.580048	0.0390824		2.0987	0.523686	0.402776	0.0242986		1.92642	0.463096	0.367675	0.0215765		1.76828	0.409516	0.335633	0.0191594		1.62312	0.362135	0.306383	0.017013		0.06	1.77147	0.706833	0.12		0.3	0.318606	0.0983733	0.008		89.0932	10.7837	0	0.123039	0.0181049	0.183209
1.15	1339.13	32	57.9091	6.93091	0	0.08	64.92		2.95353	0.854505	0.578713	0.0390542		2.09673	0.522534	0.401849	0.0242811		1.92461	0.462077	0.366829	0.021561		1.76661	0.408615	0.33486	0.0191456		1.62159	0.361339	0.305677	0.0170008		0.06	1.77	0.706856	0.12		0.3	0.318497	0.0982315	0.008		89.2007	10.6761	0	0.123229	0.017993	0.182579
1.15	1339.57	32.1	57.8898	6.85023	0	0.08	64.82		2.95075	0.852626	0.577382	0.0390261		2.09475	0.521385	0.400925	0.0242636		1.92279	0.461061	0.365985	0.0215454		1.76495	0.407717	0.33409	0.0191318		1.62007	0.360544	0.304974	0.0169885		0.06	1.76853	0.706879	0.12		0.3	0.318389	0.0980899	0.008		89.3085	10.5681	0	0.123419	0.0178812	0.181948
1.15	1340	32.2	57.8705	6.76955	0	0.08	64.72		2.94797	0.850752	0.576055	0.038998		2.09278	0.520239	0.400003	0.0242461		1.92098	0.460048	0.365144	0.0215299		1.76329	0.406821	0.333322	0.019118		1.61854	0.359752	0.304273	0.0169763		0.06	1.76706	0.706902	0.12		0.3	0.318281	0.0979486	0.008		89.4166	10.4597	0	0.123609	0.0177693	0.181314
1.15	1340.43	32.3	57.8511	6.68886	0	0.08	64.62		2.9452	0.848883	0.574731	0.03897		2.09081	0.519096	0.399084	0.0242287		1.91918	0.459037	0.364305	0.0215144		1.76163	0.405927	0.332556	0.0191043		1.61702	0.358962	0.303574	0.0169641		0.06	1.76559	0.706924	0.12		0.3	0.318172	0.0978075	0.008		89.5251	10.3511	0	0.123801	0.0176575	0.180679
1.15	1340.87	32.4	57.8318	6.60818	0	0.08	64.52		2.94243	0.84702	0.573411	0.0389419		2.08885	0.517957	0.398168	0.0242113		1.91737	0.45803	0.363468	0.021499		1.75998	0.405036	0.331792	0.0190905		1.6155	0.358174	0.302877	0.0169519		0.06	1.76413	0.706947	0.12		0.3	0.318064	0.0976668	0.008		89.6339	10.2421	0	0.123993	0.0175458	0.180041
1.15	1341.3	32.5	57.8125	6.5275	0	0.08	64.42		2.93967	0.845161	0.572095	0.038914		2.08688	0.51682	0.397254	0.0241939		1.91557	0.457025	0.362634	0.0214835		1.75832	0.404147	0.331031	0.0190768		1.61398	0.357388	0.302182	0.0169397		0.06	1.76267	0.70697	0.12		0.3	0.317956	0.0975263	0.008		89.7431	10.1327	0	0.124185	0.0174341	0.179402
1.15	1341.74	32.6	57.7932	6.44682	0	0.08	64.32		2.93691	0.843308	0.570783	0.038886		2.08492	0.515687	0.396343	0.0241765		1.91377	0.456023	0.361802	0.0214681		1.75667	0.403261	0.330271	0.0190631		1.61246	0.356604	0.301489	0.0169275		0.06	1.76121	0.706993	0.12		0.3	0.317849	0.0973861	0.008		89.8526	10.023	0	0.124378	0.0173224	0.17876
1.15	1342.17	32.7	57.7739	6.36614	0	0.08	64.22		2.93415	0.84146	0.569474	0.0388581		2.08297	0.514557	0.395434	0.0241591		1.91198	0.455023	0.360972	0.0214527		1.75502	0.402377	0.329514	0.0190494		1.61095	0.355823	0.300797	0.0169154		0.06	1.75975	0.707016	0.12		0.3	0.317741	0.0972462	0.008		89.9624	9.91301	0	0.124572	0.0172107	0.178116
1.15	1342.61	32.8	57.7545	6.28545	0	0.08	64.12		2.9314	0.839617	0.568169	0.0388302		2.08101	0.51343	0.394528	0.0241418		1.91018	0.454026	0.360145	0.0214373		1.75337	0.401496	0.328759	0.0190357		1.60944	0.355043	0.300108	0.0169032		0.06	1.75829	0.707038	0.12		0.3	0.317633	0.0971066	0.008		90.0726	9.80264	0	0.124766	0.0170991	0.17747
1.15	1343.04	32.9	57.7352	6.20477	0	0.08	64.02		2.92865	0.837778	0.566868	0.0388024		2.07906	0.512306	0.393624	0.0241245		1.90839	0.453032	0.35932	0.0214219		1.75173	0.400617	0.328006	0.0190221		1.60793	0.354266	0.299421	0.0168911		0.06	1.75684	0.707061	0.12		0.3	0.317525	0.0969672	0.008		90.1831	9.69193	0	0.124961	0.0169875	0.176823
1.15	1343.48	33	57.7159	6.12409	0	0.08	63.92		2.9259	0.835945	0.56557	0.0387746		2.07711	0.511185	0.392723	0.0241072		1.9066	0.452041	0.358498	0.0214066		1.75009	0.39974	0.327255	0.0190085		1.60642	0.353491	0.298735	0.016879		0.06	1.75539	0.707084	0.12		0.3	0.317418	0.0968281	0.008		90.294	9.58087	0	0.125156	0.016876	0.176173
1.15	1343.91	33.1	57.6966	6.04341	0	0.08	63.82		2.92316	0.834117	0.564276	0.0387468		2.07517	0.510067	0.391825	0.02409		1.90482	0.451052	0.357678	0.0213912		1.74845	0.398866	0.326506	0.0189949		1.60492	0.352718	0.298052	0.0168669		0.06	1.75394	0.707107	0.12		0.3	0.317311	0.0966893	0.008		90.4052	9.46946	0	0.125353	0.0167644	0.175521
1.15	1344.35	33.2	57.6773	5.96273	0	0.08	63.72		2.92043	0.832294	0.562986	0.0387191		2.07322	0.508952	0.390929	0.0240727		1.90303	0.450067	0.35686	0.0213759		1.74681	0.397994	0.32576	0.0189813		1.60342	0.351947	0.29737	0.0168549		0.06	1.75249	0.707129	0.12		0.3	0.317203	0.0965508	0.008		90.5167	9.3577	0	0.125549	0.0166529	0.174866
1.15	1344.78	33.3	57.658	5.88205	0	0.08	63.62		2.91769	0.830476	0.561699	0.0386914		2.07128	0.50784	0.390035	0.0240555		1.90125	0.449083	0.356044	0.0213606		1.74518	0.397125	0.325015	0.0189677		1.60192	0.351178	0.296691	0.0168428		0.06	1.75104	0.707152	0.12		0.3	0.317096	0.0964125	0.008		90.6287	9.24559	0	0.125747	0.0165414	0.17421
1.15	1345.22	33.4	57.6386	5.80136	0	0.08	63.52		2.91497	0.828662	0.560416	0.0386637		2.06935	0.506731	0.389144	0.0240383		1.89947	0.448103	0.355231	0.0213454		1.74355	0.396258	0.324273	0.0189541		1.60042	0.350411	0.296013	0.0168307		0.06	1.7496	0.707175	0.12		0.3	0.316989	0.0962745	0.008		90.7409	9.13313	0	0.125945	0.01643	0.173552
1.15	1345.65	33.5	57.6193	5.72068	0	0.08	63.42		2.91224	0.826854	0.559137	0.0386361		2.06741	0.505625	0.388256	0.0240211		1.8977	0.447125	0.35442	0.0213301		1.74192	0.395393	0.323533	0.0189406		1.59892	0.349646	0.295337	0.0168187		0.06	1.74816	0.707197	0.12		0.3	0.316882	0.0961368	0.008		90.8535	9.02031	0	0.126143	0.0163186	0.172891
1.15	1346.09	33.6	57.6	5.64	0	0.08	63.32		2.90952	0.82505	0.557861	0.0386085		2.06548	0.504522	0.38737	0.0240039		1.89593	0.44615	0.353611	0.0213149		1.74029	0.39453	0.322794	0.018927		1.59743	0.348884	0.294663	0.0168067		0.06	1.74672	0.70722	0.12		0.3	0.316775	0.0959994	0.008		90.9665	8.90714	0	0.126342	0.0162071	0.172229
1.15	1346.52	33.7	57.5807	5.55932	0	0.08	63.22		2.9068	0.823252	0.556589	0.0385809		2.06355	0.503423	0.386487	0.0239868		1.89416	0.445177	0.352805	0.0212996		1.73866	0.39367	0.322058	0.0189135		1.59594	0.348123	0.293991	0.0167947		0.06	1.74528	0.707243	0.12		0.3	0.316668	0.0958622	0.008		91.0799	8.79361	0	0.126542	0.0160958	0.171564
1.15	1346.96	33.8	57.5614	5.47864	0	0.08	63.12		2.90409	0.821458	0.55532	0.0385534		2.06163	0.502326	0.385606	0.0239697		1.89239	0.444207	0.352001	0.0212844		1.73704	0.392813	0.321324	0.0189		1.59445	0.347365	0.293321	0.0167827		0.06	1.74384	0.707265	0.12		0.3	0.316561	0.0957253	0.008		91.1935	8.67972	0	0.126743	0.0159844	0.170897
1.15	1347.39	33.9	57.542	5.39795	0	0.08	63.02		2.90138	0.819669	0.554055	0.0385259		2.05971	0.501232	0.384727	0.0239526		1.89062	0.44324	0.351199	0.0212693		1.73542	0.391957	0.320592	0.0188865		1.59296	0.346608	0.292653	0.0167708		0.06	1.74241	0.707288	0.12		0.3	0.316455	0.0955886	0.008		91.3076	8.56546	0	0.126944	0.015873	0.170228
1.15	1347.83	34	57.5227	5.31727	0	0.08	62.92		2.89868	0.817885	0.552794	0.0384984		2.05779	0.500141	0.383851	0.0239355		1.88886	0.442275	0.350399	0.0212541		1.7338	0.391104	0.319862	0.0188731		1.59148	0.345854	0.291987	0.0167588		0.06	1.74097	0.707311	0.12		0.3	0.316348	0.0954522	0.008		91.422	8.45085	0	0.127146	0.0157617	0.169556
1.15	1348.26	34.1	57.5034	5.23659	0	0.08	62.82		2.89598	0.816106	0.551536	0.038471		2.05587	0.499053	0.382978	0.0239185		1.8871	0.441313	0.349602	0.021239		1.73219	0.390253	0.319134	0.0188596		1.58999	0.345101	0.291322	0.0167469		0.06	1.73954	0.707333	0.12		0.3	0.316242	0.0953161	0.008		91.5368	8.33587	0	0.127348	0.0156504	0.168883
1.15	1348.7	34.2	57.4841	5.15591	0	0.08	62.72		2.89328	0.814332	0.550281	0.0384436		2.05395	0.497968	0.382107	0.0239014		1.88534	0.440354	0.348807	0.0212238		1.73058	0.389405	0.318409	0.0188462		1.58851	0.344351	0.29066	0.0167349		0.06	1.73812	0.707356	0.12		0.3	0.316135	0.0951803	0.008		91.6519	8.22052	0	0.127551	0.0155391	0.168207
1.15	1349.13	34.3	57.4648	5.07523	0	0.08	62.62		2.89059	0.812563	0.549031	0.0384162		2.05204	0.496886	0.381238	0.0238844		1.88359	0.439397	0.348014	0.0212087		1.72897	0.388559	0.317685	0.0188328		1.58703	0.343603	0.289999	0.016723		0.06	1.73669	0.707379	0.12		0.3	0.316029	0.0950447	0.008		91.7674	8.1048	0	0.127755	0.0154278	0.167529
1.15	1349.57	34.4	57.4455	4.99455	0	0.08	62.52		2.8879	0.810798	0.547783	0.0383889		2.05013	0.495807	0.380372	0.0238674		1.88184	0.438442	0.347223	0.0211937		1.72736	0.387715	0.316963	0.0188194		1.58556	0.342857	0.28934	0.0167111		0.06	1.73526	0.707401	0.12		0.3	0.315923	0.0949094	0.008		91.8833	7.98872	0	0.127959	0.0153166	0.166849
1.15	1350	34.5	57.4261	4.91386	0	0.08	62.42		2.88522	0.809038	0.546539	0.0383616		2.04823	0.494731	0.379508	0.0238505		1.88009	0.437491	0.346435	0.0211786		1.72575	0.386873	0.316243	0.018806		1.58408	0.342112	0.288683	0.0166992		0.06	1.73384	0.707424	0.12		0.3	0.315817	0.0947744	0.008		91.9996	7.87226	0	0.128164	0.0152053	0.166167
1.15	1350.43	34.6	57.4068	4.83318	0	0.08	62.32		2.88254	0.807283	0.545299	0.0383344		2.04632	0.493657	0.378647	0.0238335		1.87834	0.436542	0.345648	0.0211635		1.72415	0.386034	0.315526	0.0187927		1.58261	0.34137	0.288028	0.0166874		0.06	1.73242	0.707446	0.12		0.3	0.315711	0.0946396	0.008		92.1162	7.75543	0	0.12837	0.0150941	0.165482
1.15	1350.87	34.7	57.3875	4.7525	0	0.08	62.22		2.87986	0.805532	0.544062	0.0383071		2.04442	0.492587	0.377788	0.0238166		1.8766	0.435595	0.344864	0.0211485		1.72255	0.385197	0.31481	0.0187793		1.58114	0.34063	0.287375	0.0166755		0.06	1.731	0.707469	0.12		0.3	0.315605	0.0945051	0.008		92.2332	7.63822	0	0.128576	0.0149829	0.164795
1.15	1351.3	34.8	57.3682	4.67182	0	0.08	62.12		2.87719	0.803787	0.542829	0.03828		2.04253	0.49152	0.376932	0.0237997		1.87486	0.434651	0.344083	0.0211335		1.72095	0.384362	0.314096	0.018766		1.57968	0.339892	0.286723	0.0166637		0.06	1.72958	0.707491	0.12		0.3	0.315499	0.0943708	0.008		92.3506	7.52063	0	0.128783	0.0148717	0.164106
1.15	1351.74	34.9	57.3489	4.59114	0	0.08	62.02		2.87452	0.802046	0.541599	0.0382528		2.04063	0.490455	0.376078	0.0237828		1.87312	0.43371	0.343303	0.0211185		1.71935	0.38353	0.313385	0.0187527		1.57821	0.339156	0.286073	0.0166519		0.06	1.72817	0.707514	0.12		0.3	0.315393	0.0942368	0.008		92.4683	7.40267	0	0.128991	0.0147605	0.163414
1.15	1352.17	35	57.3295	4.51045	0	0.08	61.92		2.87185	0.800309	0.540372	0.0382257		2.03874	0.489393	0.375226	0.0237659		1.87138	0.432771	0.342525	0.0211035		1.71776	0.382699	0.312675	0.0187394		1.57675	0.338421	0.285426	0.0166401		0.06	1.72676	0.707536	0.12		0.3	0.315288	0.0941031	0.008		92.5865	7.28433	0	0.129199	0.0146493	0.162721
1.15	1352.61	35.1	57.3102	4.42977	0	0.08	61.82		2.86919	0.798578	0.539149	0.0381986		2.03685	0.488334	0.374377	0.0237491		1.86965	0.431834	0.34175	0.0210886		1.71617	0.381871	0.311967	0.0187261		1.57529	0.337689	0.28478	0.0166283		0.06	1.72535	0.707559	0.12		0.3	0.315182	0.0939696	0.008		92.705	7.1656	0	0.129408	0.0145381	0.162024
1.15	1353.04	35.2	57.2909	4.34909	0	0.08	61.72		2.86653	0.796851	0.537929	0.0381715		2.03496	0.487278	0.37353	0.0237323		1.86791	0.430901	0.340977	0.0210736		1.71458	0.381046	0.311261	0.0187128		1.57383	0.336959	0.284135	0.0166165		0.06	1.72394	0.707581	0.12		0.3	0.315076	0.0938364	0.008		92.8239	7.04649	0	0.129618	0.0144269	0.161326
1.15	1353.48	35.3	57.2716	4.26841	0	0.08	61.62		2.86388	0.795129	0.536713	0.0381445		2.03308	0.486225	0.372685	0.0237155		1.86618	0.429969	0.340206	0.0210587		1.71299	0.380222	0.310558	0.0186996		1.57237	0.336231	0.283493	0.0166047		0.06	1.72253	0.707604	0.12		0.3	0.314971	0.0937035	0.008		92.9432	6.92699	0	0.129828	0.0143158	0.160625
1.15	1353.91	35.4	57.2523	4.18773	0	0.08	61.52		2.86123	0.793411	0.5355	0.0381175		2.0312	0.485175	0.371843	0.0236987		1.86446	0.42904	0.339437	0.0210438		1.7114	0.379401	0.309856	0.0186864		1.57091	0.335504	0.282852	0.016593		0.06	1.72112	0.707626	0.12		0.3	0.314866	0.0935708	0.008		93.0629	6.8071	0	0.130039	0.0142046	0.159922
1.15	1354.35	35.5	57.233	4.10705	0	0.08	61.42		2.85858	0.791698	0.534291	0.0380906		2.02932	0.484127	0.371003	0.023682		1.86273	0.428114	0.338671	0.0210289		1.70982	0.378582	0.309156	0.0186731		1.56946	0.33478	0.282213	0.0165813		0.06	1.71972	0.707649	0.12		0.3	0.314761	0.0934384	0.008		93.1829	6.68682	0	0.130251	0.0140934	0.159217
1.15	1354.78	35.6	57.2136	4.02636	0	0.08	61.32		2.85594	0.789989	0.533084	0.0380637		2.02745	0.483083	0.370166	0.0236652		1.86101	0.42719	0.337906	0.0210141		1.70824	0.377765	0.308458	0.0186599		1.56801	0.334058	0.281576	0.0165695		0.06	1.71832	0.707671	0.12		0.3	0.314656	0.0933062	0.008		93.3034	6.56615	0	0.130463	0.0139823	0.158509
1.15	1355.22	35.7	57.1943	3.94568	0	0.08	61.22		2.8533	0.788286	0.531882	0.0380368		2.02557	0.482041	0.36933	0.0236485		1.85929	0.426269	0.337144	0.0209992		1.70666	0.37695	0.307762	0.0186468		1.56656	0.333337	0.280941	0.0165578		0.06	1.71692	0.707694	0.12		0.3	0.314551	0.0931743	0.008		93.4242	6.44509	0	0.130676	0.0138711	0.157799
1.15	1355.65	35.8	57.175	3.865	0	0.08	61.12		2.85067	0.786586	0.530682	0.0380099		2.0237	0.481002	0.368498	0.0236318		1.85758	0.42535	0.336383	0.0209844		1.70509	0.376137	0.307068	0.0186336		1.56512	0.332619	0.280307	0.0165461		0.06	1.71552	0.707716	0.12		0.3	0.314446	0.0930426	0.008		93.5455	6.32363	0	0.13089	0.01376	0.157086
1.15	1356.09	35.9	57.1557	3.78432	0	0.08	61.02		2.84804	0.784892	0.529486	0.0379831		2.02184	0.479965	0.367667	0.0236151		1.85586	0.424434	0.335625	0.0209696		1.70351	0.375327	0.306376	0.0186205		1.56367	0.331902	0.279676	0.0165345		0.06	1.71412	0.707738	0.12		0.3	0.314341	0.0929112	0.008		93.6671	6.20177	0	0.131105	0.0136488	0.156372
1.15	1356.52	36	57.1364	3.70364	0	0.08	60.92		2.84541	0.783202	0.528293	0.0379563		2.01997	0.478932	0.366839	0.0235985		1.85415	0.42352	0.334869	0.0209548		1.70194	0.374519	0.305686	0.0186073		1.56223	0.331187	0.279046	0.0165228		0.06	1.71273	0.707761	0.12		0.3	0.314236	0.0927801	0.008		93.7892	6.07951	0	0.13132	0.0135377	0.155654
1.15	1356.96	36.1	57.117	3.62295	0	0.08	60.82		2.84279	0.781516	0.527104	0.0379296		2.01811	0.477901	0.366013	0.0235818		1.85244	0.422608	0.334115	0.0209401		1.70038	0.373713	0.304998	0.0185942		1.56079	0.330474	0.278417	0.0165112		0.06	1.71134	0.707783	0.12		0.3	0.314131	0.0926492	0.008		93.9116	5.95685	0	0.131536	0.0134265	0.154934
1.15	1357.39	36.2	57.0977	3.54227	0	0.08	60.72		2.84017	0.779835	0.525918	0.0379028		2.01625	0.476873	0.365189	0.0235652		1.85074	0.421699	0.333363	0.0209253		1.69881	0.372909	0.304311	0.0185811		1.55935	0.329764	0.277791	0.0164995		0.06	1.70995	0.707806	0.12		0.3	0.314027	0.0925185	0.008		94.0345	5.83378	0	0.131752	0.0133153	0.154212
1.15	1357.83	36.3	57.0784	3.46159	0	0.08	60.62		2.83756	0.778159	0.524735	0.0378761		2.01439	0.475848	0.364368	0.0235486		1.84903	0.420793	0.332614	0.0209106		1.69724	0.372107	0.303627	0.018568		1.55792	0.329055	0.277166	0.0164879		0.06	1.70856	0.707828	0.12		0.3	0.313922	0.0923882	0.008		94.1577	5.71031	0	0.13197	0.0132042	0.153488
1.15	1358.26	36.4	57.0591	3.38091	0	0.08	60.52		2.83494	0.776487	0.523556	0.0378495		2.01254	0.474825	0.363549	0.0235321		1.84733	0.419888	0.331866	0.0208959		1.69568	0.371308	0.302944	0.018555		1.55648	0.328348	0.276543	0.0164763		0.06	1.70717	0.70785	0.12		0.3	0.313818	0.092258	0.008		94.2814	5.58643	0	0.132188	0.013093	0.152761
1.15	1358.7	36.5	57.0398	3.30023	0	0.08	60.42		2.83234	0.774819	0.522379	0.0378229		2.01069	0.473806	0.362732	0.0235155		1.84563	0.418987	0.331121	0.0208812		1.69412	0.37051	0.302264	0.0185419		1.55505	0.327643	0.275922	0.0164647		0.06	1.70579	0.707873	0.12		0.3	0.313714	0.0921282	0.008		94.4054	5.46214	0	0.132406	0.0129818	0.152031
1.15	1359.13	36.6	57.0205	3.21955	0	0.08	60.32		2.82973	0.773156	0.521206	0.0377963		2.00884	0.472789	0.361918	0.023499		1.84393	0.418087	0.330377	0.0208665		1.69257	0.369715	0.301585	0.0185289		1.55362	0.326939	0.275302	0.0164532		0.06	1.7044	0.707895	0.12		0.3	0.31361	0.0919985	0.008		94.5299	5.33744	0	0.132626	0.0128706	0.151299
1.15	1359.57	36.7	57.0011	0	0	0.08	57.0811		2.82713	0.771497	0.520037	0.0377697		2.007	0.471774	0.361105	0.0234825		1.84224	0.41719	0.329636	0.0208518		1.69101	0.368922	0.300908	0.0185159		1.5522	0.326238	0.274684	0.0164416		0.06	1.70302	0.707917	0.12		0.3	0.313506	0.0918692	0.008		99.8598	0	0	0.140151	0.00840924	0.119916
1.15	1360	36.8	56.9818	0	0	0.08	57.0618		2.82454	0.769843	0.51887	0.0377432		2.00515	0.470763	0.360295	0.023466		1.84055	0.416296	0.328896	0.0208372		1.68946	0.368131	0.300233	0.0185029		1.55077	0.325538	0.274068	0.01643		0.06	1.70164	0.70794	0.12		0.3	0.313402	0.09174	0.008		99.8598	0	0	0.140199	0.00840938	0.119916
1.15	1360.43	36.9	56.9625	0	0	0.08	57.0425		2.82194	0.768193	0.517707	0.0377167		2.00331	0.469754	0.359488	0.0234495		1.83886	0.415404	0.328159	0.0208225		1.68791	0.367342	0.29956	0.0184899		1.54935	0.324841	0.273454	0.0164185		0.06	1.70027	0.707962	0.12		0.3	0.313298	0.0916112	0.008		99.8598	0	0	0.140246	0.00840952	0.119916
1.15	1360.87	37	56.9432	0	0	0.08	57.0232		2.81936	0.766548	0.516547	0.0376903		2.00147	0.468748	0.358682	0.0234331		1.83717	0.414514	0.327424	0.0208079		1.68636	0.366555	0.298889	0.0184769		1.54793	0.324145	0.272841	0.016407		0.06	1.69889	0.707984	0.12		0.3	0.313194	0.0914825	0.008		99.8597	0	0	0.140294	0.00840966	0.119916
1.15	1361.3	37.1	56.9239	0	0	0.08	57.0039		2.81677	0.764907	0.51539	0.0376638		1.99964	0.467744	0.357879	0.0234166		1.83549	0.413627	0.32669	0.0207934		1.68481	0.36577	0.29822	0.0184639		1.54651	0.323451	0.27223	0.0163955		0.06	1.69752	0.708007	0.12		0.3	0.31309	0.0913542	0.008		99.8597	0	0	0.140341	0.0084098	0.119916
1.15	1361.74	37.2	56.9045	0	0	0.08	56.9845		2.81419	0.76327	0.514237	0.0376374		1.99781	0.466744	0.357078	0.0234002		1.83381	0.412742	0.325959	0.0207788		1.68327	0.364988	0.297552	0.018451		1.54509	0.322759	0.271621	0.016384		0.06	1.69614	0.708029	0.12		0.3	0.312986	0.091226	0.008		99.8596	0	0	0.140389	0.00840994	0.119916
1.15	1362.17	37.3	56.8852	0	0	0.08	56.9652		2.81161	0.761638	0.513086	0.0376111		1.99598	0.465746	0.356279	0.0233838		1.83213	0.411859	0.32523	0.0207642		1.68173	0.364207	0.296886	0.0184381		1.54367	0.322069	0.271013	0.0163725		0.06	1.69477	0.708051	0.12		0.3	0.312883	0.0910982	0.008		99.8596	0	0	0.140437	0.00841007	0.119916
1.15	1362.61	37.4	56.8659	0	0	0.08	56.9459		2.80904	0.76001	0.511939	0.0375848		1.99415	0.46475	0.355483	0.0233675		1.83045	0.410979	0.324503	0.0207497		1.68019	0.363429	0.296223	0.0184252		1.54226	0.32138	0.270407	0.0163611		0.06	1.69341	0.708073	0.12		0.3	0.312779	0.0909705	0.008		99.8595	0	0	0.140484	0.00841021	0.119916
1.15	1363.04	37.5	56.8466	0	0	0.08	56.9266		2.80647	0.758387	0.510795	0.0375585		1.99233	0.463757	0.354688	0.0233511		1.82877	0.410101	0.323778	0.0207352		1.67865	0.362653	0.295561	0.0184123		1.54085	0.320694	0.269803	0.0163496		0.06	1.69204	0.708096	0.12		0.3	0.312676	0.0908431	0.008		99.8595	0	0	0.140532	0.00841035	0.119916
1.15	1363.48	37.6	56.8273	0	0	0.08	56.9073		2.8039	0.756768	0.509654	0.0375322		1.9905	0.462767	0.353896	0.0233348		1.8271	0.409225	0.323054	0.0207207		1.67712	0.361878	0.294901	0.0183994		1.53944	0.320009	0.2692	0.0163382		0.06	1.69068	0.708118	0.12		0.3	0.312573	0.090716	0.008		99.8594	0	0	0.14058	0.00841049	0.119916
1.15	1363.91	37.7	56.808	0	0	0.08	56.888		2.80134	0.755153	0.508516	0.037506		1.98868	0.46178	0.353106	0.0233185		1.82543	0.408352	0.322333	0.0207062		1.67558	0.361106	0.294242	0.0183866		1.53803	0.319326	0.268599	0.0163268		0.06	1.68931	0.70814	0.12		0.3	0.31247	0.0905891	0.008		99.8594	0	0	0.140627	0.00841063	0.119916
1.15	1364.35	37.8	56.7886	0	0	0.08	56.8686		2.79878	0.753542	0.507382	0.0374798		1.98687	0.460795	0.352318	0.0233022		1.82377	0.407481	0.321614	0.0206917		1.67405	0.360336	0.293586	0.0183737		1.53663	0.318645	0.268	0.0163154		0.06	1.68795	0.708162	0.12		0.3	0.312366	0.0904625	0.008		99.8593	0	0	0.140675	0.00841077	0.119916
1.15	1364.78	37.9	56.7693	0	0	0.08	56.8493		2.79623	0.751936	0.50625	0.0374536		1.98505	0.459812	0.351532	0.0232859		1.8221	0.406613	0.320897	0.0206773		1.67252	0.359568	0.292931	0.0183609		1.53523	0.317966	0.267402	0.016304		0.06	1.68659	0.708184	0.12		0.3	0.312263	0.0903361	0.008		99.8593	0	0	0.140723	0.00841091	0.119916
1.15	1365.22	38	56.75	0	0	0.08	56.83		2.79367	0.750334	0.505122	0.0374275		1.98324	0.458833	0.350749	0.0232697		1.82044	0.405746	0.320182	0.0206629		1.671	0.358802	0.292278	0.0183481		1.53383	0.317289	0.266806	0.0162926		0.06	1.68524	0.708207	0.12		0.3	0.31216	0.0902099	0.008		99.8592	0	0	0.140771	0.00841105	0.119916
1.15	1365.65	38.1	56.7307	0	0	0.08	56.8107		2.79113	0.748736	0.503997	0.0374014		1.98143	0.457856	0.349968	0.0232535		1.81878	0.404882	0.319468	0.0206485		1.66947	0.358038	0.291627	0.0183353		1.53243	0.316613	0.266212	0.0162812		0.06	1.68388	0.708229	0.12		0.3	0.312058	0.090084	0.008		99.8592	0	0	0.140819	0.00841119	0.119916
1.15	1366.09	38.2	56.7114	0	0	0.08	56.7914		2.78858	0.747143	0.502875	0.0373753		1.97963	0.456881	0.349188	0.0232372		1.81712	0.404021	0.318757	0.0206341		1.66795	0.357276	0.290978	0.0183225		1.53103	0.315939	0.265619	0.0162699		0.06	1.68253	0.708251	0.12		0.3	0.311955	0.0899583	0.008		99.8591	0	0	0.140866	0.00841133	0.119915
1.15	1366.52	38.3	56.692	0	0	0.08	56.772		2.78604	0.745553	0.501756	0.0373493		1.97782	0.45591	0.348411	0.0232211		1.81546	0.403161	0.318048	0.0206197		1.66643	0.356516	0.29033	0.0183097		1.52963	0.315267	0.265028	0.0162586		0.06	1.68117	0.708273	0.12		0.3	0.311852	0.0898329	0.008		99.8591	0	0	0.140914	0.00841147	0.119915
1.15	1366.96	38.4	56.6727	0	0	0.08	56.7527		2.78351	0.743968	0.50064	0.0373233		1.97602	0.45494	0.347636	0.0232049		1.81381	0.402304	0.31734	0.0206053		1.66492	0.355758	0.289685	0.018297		1.52824	0.314597	0.264439	0.0162472		0.06	1.67982	0.708295	0.12		0.3	0.31175	0.0897077	0.008		99.859	0	0	0.140962	0.00841161	0.119915
1.15	1367.39	38.5	56.6534	0	0	0.08	56.7334		2.78097	0.742387	0.499527	0.0372973		1.97423	0.453974	0.346864	0.0231887		1.81216	0.401449	0.316635	0.020591		1.6634	0.355002	0.289041	0.0182843		1.52685	0.313928	0.263851	0.0162359		0.06	1.67848	0.708317	0.12		0.3	0.311647	0.0895827	0.008		99.859	0	0	0.14101	0.00841175	0.119915
1.15	1367.83	38.6	56.6341	0	0	0.08	56.7141		2.77844	0.740811	0.498417	0.0372713		1.97243	0.453009	0.346093	0.0231726		1.81051	0.400597	0.315932	0.0205767		1.66189	0.354248	0.288398	0.0182715		1.52546	0.313262	0.263265	0.0162246		0.06	1.67713	0.708339	0.12		0.3	0.311545	0.089458	0.008		99.8589	0	0	0.141058	0.00841189	0.119915
1.15	1368.26	38.7	56.6148	0	0	0.08	56.6948		2.77592	0.739238	0.49731	0.0372454		1.97064	0.452048	0.345325	0.0231565		1.80887	0.399746	0.31523	0.0205624		1.66038	0.353496	0.287758	0.0182588		1.52408	0.312597	0.26268	0.0162134		0.06	1.67579	0.708362	0.12		0.3	0.311442	0.0893335	0.008		99.8589	0	0	0.141106	0.00841203	0.119915
1.15	1368.7	38.8	56.5955	0	0	0.08	56.6755		2.7734	0.73767	0.496207	0.0372196		1.96885	0.451089	0.344558	0.0231404		1.80722	0.398898	0.31453	0.0205481		1.65887	0.352746	0.287119	0.0182461		1.52269	0.311934	0.262097	0.0162021		0.06	1.67444	0.708384	0.12		0.3	0.31134	0.0892093	0.008		99.8588	0	0	0.141155	0.00841217	0.119915
1.15	1369.13	38.9	56.5761	0	0	0.08	56.6561		2.77088	0.736106	0.495106	0.0371937		1.96706	0.450132	0.343794	0.0231243		1.80558	0.398052	0.313833	0.0205338		1.65736	0.351998	0.286483	0.0182335		1.52131	0.311272	0.261516	0.0161908		0.06	1.6731	0.708406	0.12		0.3	0.311238	0.0890853	0.008		99.8588	0	0	0.141203	0.00841231	0.119915
1.15	1369.57	39	56.5568	0	0	0.08	56.6368		2.76836	0.734546	0.494008	0.0371679		1.96527	0.449178	0.343032	0.0231083		1.80394	0.397209	0.313137	0.0205196		1.65586	0.351252	0.285847	0.0182208		1.51993	0.310612	0.260936	0.0161796		0.06	1.67176	0.708428	0.12		0.3	0.311136	0.0889615	0.008		99.8587	0	0	0.141251	0.00841245	0.119915
1.15	1370	39.1	56.5375	0	0	0.08	56.6175		2.76585	0.73299	0.492914	0.0371421		1.96349	0.448227	0.342272	0.0230923		1.80231	0.396367	0.312443	0.0205053		1.65435	0.350508	0.285214	0.0182082		1.51855	0.309955	0.260358	0.0161684		0.06	1.67042	0.70845	0.12		0.3	0.311034	0.088838	0.008		99.8587	0	0	0.141299	0.00841259	0.119915
1.15	1370.43	39.2	56.5182	0	0	0.08	56.5982		2.76334	0.731438	0.491822	0.0371164		1.96171	0.447278	0.341514	0.0230763		1.80067	0.395528	0.311751	0.0204911		1.65285	0.349766	0.284582	0.0181956		1.51717	0.309298	0.259781	0.0161572		0.06	1.66909	0.708472	0.12		0.3	0.310932	0.0887147	0.008		99.8587	0	0	0.141347	0.00841273	0.119915
1.15	1370.87	39.3	56.4989	0	0	0.08	56.5789		2.76084	0.72989	0.490733	0.0370906		1.95993	0.446332	0.340758	0.0230603		1.79904	0.394691	0.311061	0.0204769		1.65136	0.349026	0.283952	0.0181829		1.5158	0.308644	0.259206	0.016146		0.06	1.66775	0.708494	0.12		0.3	0.31083	0.0885917	0.008		99.8586	0	0	0.141396	0.00841288	0.119915
1.15	1371.3	39.4	56.4795	0	0	0.08	56.5595		2.75834	0.728347	0.489648	0.0370649		1.95816	0.445388	0.340004	0.0230443		1.79741	0.393857	0.310373	0.0204627		1.64986	0.348288	0.283324	0.0181704		1.51442	0.307991	0.258633	0.0161348		0.06	1.66642	0.708516	0.12		0.3	0.310729	0.0884689	0.008		99.8586	0	0	0.141444	0.00841302	0.119915
1.15	1371.74	39.5	56.4602	0	0	0.08	56.5402		2.75584	0.726807	0.488565	0.0370393		1.95638	0.444446	0.339252	0.0230283		1.79578	0.393024	0.309687	0.0204486		1.64837	0.347552	0.282698	0.0181578		1.51305	0.30734	0.258061	0.0161236		0.06	1.66509	0.708538	0.12		0.3	0.310627	0.0883463	0.008		99.8585	0	0	0.141492	0.00841316	0.119915
1.15	1372.17	39.6	56.4409	0	0	0.08	56.5209		2.75335	0.725272	0.487485	0.0370137		1.95461	0.443507	0.338502	0.0230124		1.79416	0.392194	0.309002	0.0204344		1.64688	0.346817	0.282073	0.0181452		1.51168	0.306691	0.257491	0.0161125		0.06	1.66376	0.70856	0.12		0.3	0.310525	0.088224	0.008		99.8585	0	0	0.141541	0.0084133	0.119915
1.15	1372.61	39.7	56.4216	0	0	0.08	56.5016		2.75086	0.723741	0.486408	0.0369881		1.95285	0.442571	0.337754	0.0229965		1.79254	0.391366	0.30832	0.0204203		1.64539	0.346085	0.28145	0.0181327		1.51032	0.306043	0.256922	0.0161013		0.06	1.66244	0.708582	0.12		0.3	0.310424	0.0881019	0.008		99.8584	0	0	0.141589	0.00841344	0.119915
References:
Workman, R. K. & Hart, S. R. Major and trace element composition of the depleted MORB mantle (DMM). Earth and Planetary Science Letters 231, 53–72 (2005).
Salters, V. J. M. & Stracke, A. Composition of the depleted mantle. Geochemistry, Geophysics, Geosystems 5, (2004).
Gaetani, G. A., & Grove, T. L. The influence of water on melting of mantle peridotite. Contributions to Mineralogy and Petrology 131, 323-346 (1998).
Parman, S. W., & Grove, T. L. Harzburgite melting with and without H2O: Experimental data and predictive modeling. Journal of Geophysical Research: Solid Earth 109 B02201 (2004).
Plank, T. & Langmuir, C. H. The chemical composition of subducting sediment and its consequences for the crust and mantle. Chemical Geology 145, 325–394 (1998).
Wang, J. et al. Oxidation State of Arc Mantle Revealed by Partitioning of V, Sc, and Ti Between Mantle Minerals and Basaltic Melts. J. Geophys. Res. Solid Earth 124, 4617–4638 (2019).
[truncated: 25 more columns]
