# Supplementary material for: Latitude-dependent oxygen fugacity in arc magmas
Source: Nat Commun. 2024 Jul 18;15:6050. doi: 10.1038/s41467-024-50337-6 (PMC11258285; doi:10.1038/s41467-024-50337-6)
Supplement: Supplementary file 11 — Supplementary Data 8 [file 41467_2024_50337_MOESM11_ESM.xlsx]

## Sheet: Sheet1
Supplementary Table 8. Model for V, Sc and Ti variations during mid-ocean ridge mantle melting.
	mantle melting pressure (GPa)						Mineral modes and melting reaction of the mantle								Initial geochemical composition of sub-arc mantle								Parameters for calculating D V (Wang et al., 2019)
	Average	1.2						Ol	Opx	Cpx	Sp				Co (ppm)	V	Ti	Sc	References				Mg# Ol	Wo# Opx	Al Cpx	Cr# Sp	NBO/Tot	Mg# Cpx	Mg# Opx	AlT Opx	Wo Cpx
	‒1s	0.8					spinel lherzolite mineral assemblage	57	28	13	2	Workman and Hart (2005)			Average	79	798	16.3	Workman and Hart (2005)				89.5925	4.37517	0.171924	10.654	0.8	90.8	89.7	0.147949	43.89
	+1s	1.4					melting reaction for harzburgite	0.0730159	-1.07302			Fallon et al. (2008)			uncertainty (+)	84.53	893.76	18.419	Salters and Stracke (2004)
							melting reaction for spinel lherzolite	0.221727	-0.364742	-0.816616	-0.0374873	Gaetani and Grove (1998)			uncertainty (-)	73.47	702.24	14.181
									Dmineral/melt for V (FMQ-0.5)	-0.5				Dmineral/melt for V (FMQ)	0				Dmineral/melt for V (FMQ+0.3)	0.3				Dmineral/melt for V (FMQ+0.5)	0.5				Dmineral/melt for V (FMQ+1.0)	1				Dmineral/melt for Sc					Dmineral/melt for Ti					Mineral assemblages				Bulk D
Pressure (GPa)	Temperature (℃)	F	Ol	Opx	Cpx	Sp	Mass of residue		V Sp	V Cpx	V Opx	V Ol		V Sp	V Cpx	V Opx	V Ol		V Sp	V Cpx	V Opx	V Ol		V Sp	V Cpx	V Opx	V Ol		V Sp	V Cpx	V Opx	V Ol		Sc Sp	Sc Cpx	Sc Opx	Sc Ol		Ti Sp	Ti Cpx	Ti Opx	Ti Ol		Ol	Opx	Cpx	Sp	D Ti	D Sc
1.2	1300.43	0.1	57.0222	27.9635	12.9183	1.99625	99.9003		3.98716	1.4204	0.896781	0.0669892		3.21858	1.04451	0.713981	0.0497743		2.83051	0.868582	0.622711	0.041649		2.59815	0.768088	0.568443	0.0369832		2.09732	0.564821	0.452571	0.0274793		0.06	1.88713	0.701021	0.12		0.3	0.322937	0.111292	0.008		57.0791	27.9914	12.9312	1.99824	0.083473	0.509949
1.2	1300.87	0.2	57.0443	27.9271	12.8367	1.9925	99.8006		3.98322	1.41712	0.894616	0.0669386		3.2154	1.0421	0.712257	0.0497366		2.82771	0.866578	0.621208	0.0416175		2.59558	0.766315	0.56707	0.0369553		2.09524	0.563518	0.451478	0.0274585		0.06	1.8855	0.701046	0.12		0.3	0.322823	0.111124	0.008		57.1583	27.9829	12.8623	1.99648	0.0831803	0.508479
1.2	1301.3	0.3	57.0665	27.8906	12.755	1.98875	99.7009		3.97929	1.41385	0.892457	0.066888		3.21222	1.03969	0.710538	0.0496991		2.82491	0.864578	0.619708	0.0415861		2.59302	0.764547	0.565702	0.0369274		2.09317	0.562218	0.450389	0.0274377		0.06	1.88386	0.70107	0.12		0.3	0.322709	0.110956	0.008		57.2377	27.9743	12.7933	1.99472	0.0828875	0.507009
1.2	1301.74	0.4	57.0887	27.8541	12.6734	1.98501	99.6012		3.97536	1.41059	0.890305	0.0668375		3.20905	1.03729	0.708824	0.0496615		2.82212	0.862585	0.618214	0.0415547		2.59045	0.762785	0.564337	0.0368995		2.09111	0.560921	0.449302	0.027417		0.06	1.88222	0.701095	0.12		0.3	0.322596	0.110789	0.008		57.3173	27.9656	12.7241	1.99295	0.0825944	0.505538
1.2	1302.17	0.5	57.1109	27.8176	12.5917	1.98126	99.5014		3.97143	1.40734	0.888159	0.066787		3.20588	1.0349	0.707116	0.0496241		2.81934	0.860598	0.616723	0.0415233		2.5879	0.761027	0.562977	0.0368716		2.08904	0.559629	0.448219	0.0273963		0.06	1.88059	0.70112	0.12		0.3	0.322482	0.110621	0.008		57.397	27.957	12.6548	1.99118	0.0823012	0.504068
1.2	1302.61	0.6	57.133	27.7812	12.51	1.97751	99.4017		3.96752	1.4041	0.886019	0.0667367		3.20272	1.03252	0.705412	0.0495866		2.81656	0.858616	0.615238	0.041492		2.58535	0.759274	0.56162	0.0368438		2.08698	0.55834	0.447139	0.0273757		0.06	1.87896	0.701145	0.12		0.3	0.322369	0.110455	0.008		57.4769	27.9484	12.5853	1.98941	0.0820078	0.502598
1.2	1303.04	0.7	57.1552	27.7447	12.4284	1.97376	99.302		3.9636	1.40087	0.883885	0.0666864		3.19956	1.03014	0.703714	0.0495492		2.81378	0.856639	0.613756	0.0414607		2.5828	0.757527	0.560268	0.036816		2.08492	0.557055	0.446063	0.027355		0.06	1.87733	0.70117	0.12		0.3	0.322256	0.110288	0.008		57.5569	27.9397	12.5157	1.98763	0.0817143	0.501128
1.2	1303.48	0.8	57.1774	27.7082	12.3467	1.97001	99.2023		3.9597	1.39765	0.881758	0.0666361		3.19641	1.02777	0.70202	0.0495119		2.81101	0.854669	0.612279	0.0414295		2.58025	0.755784	0.55892	0.0367883		2.08287	0.555773	0.444989	0.0273344		0.06	1.87571	0.701194	0.12		0.3	0.322142	0.110122	0.008		57.6372	27.931	12.446	1.98585	0.0814206	0.499657
1.2	1303.91	0.9	57.1996	27.6717	12.265	1.96626	99.1026		3.9558	1.39443	0.879637	0.0665859		3.19326	1.02541	0.700331	0.0494746		2.80824	0.852704	0.610807	0.0413983		2.57771	0.754046	0.557575	0.0367606		2.08082	0.554496	0.443919	0.0273138		0.06	1.87409	0.701219	0.12		0.3	0.322029	0.109956	0.008		57.7175	27.9223	12.3761	1.98407	0.0811267	0.498187
1.2	1304.35	1	57.2217	27.6353	12.1834	1.96251	99.0029		3.95191	1.39123	0.877523	0.0665358		3.19012	1.02305	0.698648	0.0494374		2.80548	0.850744	0.609338	0.0413671		2.57517	0.752314	0.556235	0.0367329		2.07877	0.553221	0.442852	0.0272933		0.06	1.87246	0.701244	0.12		0.3	0.321916	0.109791	0.008		57.798	27.9136	12.3061	1.98228	0.0808326	0.496717
1.2	1304.78	1.1	57.2439	27.5988	12.1017	1.95876	98.9032		3.94802	1.38803	0.875414	0.0664858		3.18698	1.02071	0.696969	0.0494002		2.80272	0.84879	0.607874	0.041336		2.57264	0.750586	0.554899	0.0367053		2.07673	0.551951	0.441788	0.0272727		0.06	1.87085	0.701268	0.12		0.3	0.321804	0.109626	0.008		57.8787	27.9049	12.2359	1.98049	0.0805383	0.495246
1.2	1305.22	1.2	57.2661	27.5623	12.0201	1.95502	98.8035		3.94414	1.38485	0.873312	0.0664358		3.18385	1.01836	0.695296	0.0493631		2.79996	0.846842	0.606414	0.0413049		2.57011	0.748863	0.553566	0.0366777		2.07468	0.550684	0.440727	0.0272522		0.06	1.86923	0.701293	0.12		0.3	0.321691	0.109461	0.008		57.9596	27.8961	12.1656	1.97869	0.0802439	0.493776
1.2	1305.65	1.3	57.2882	27.5258	11.9384	1.95127	98.7037		3.94026	1.38167	0.871216	0.0663859		3.18072	1.01603	0.693627	0.049326		2.79721	0.844899	0.604959	0.0412739		2.56759	0.747145	0.552238	0.0366501		2.07265	0.54942	0.439669	0.0272318		0.06	1.86762	0.701318	0.12		0.3	0.321578	0.109297	0.008		58.0406	27.8873	12.0952	1.97689	0.0799493	0.492305
1.2	1306.09	1.4	57.3104	27.4894	11.8567	1.94752	98.604		3.93639	1.3785	0.869127	0.066336		3.17759	1.0137	0.691963	0.0492889		2.79446	0.842962	0.603508	0.0412429		2.56506	0.745432	0.550913	0.0366226		2.07061	0.548161	0.438615	0.0272113		0.06	1.866	0.701343	0.12		0.3	0.321466	0.109133	0.008		58.1218	27.8785	12.0246	1.97509	0.0796545	0.490835
1.2	1306.52	1.5	57.3326	27.4529	11.7751	1.94377	98.5043		3.93253	1.37534	0.867043	0.0662862		3.17447	1.01137	0.690304	0.0492519		2.79172	0.84103	0.602061	0.041212		2.56255	0.743724	0.549592	0.0365951		2.06858	0.546905	0.437563	0.0271909		0.06	1.8644	0.701367	0.12		0.3	0.321353	0.108969	0.008		58.2031	27.8697	11.9539	1.97328	0.0793595	0.489364
1.2	1306.96	1.6	57.3548	27.4164	11.6934	1.94002	98.4046		3.92867	1.37219	0.864966	0.0662365		3.17136	1.00906	0.68865	0.049215		2.78898	0.839104	0.600619	0.041181		2.56003	0.74202	0.548276	0.0365677		2.06655	0.545652	0.436515	0.0271705		0.06	1.86279	0.701392	0.12		0.3	0.321241	0.108805	0.008		58.2846	27.8609	11.883	1.97147	0.0790644	0.487894
1.2	1307.39	1.7	57.3769	27.3799	11.6118	1.93627	98.3049		3.92482	1.36905	0.862894	0.0661868		3.16825	1.00675	0.687001	0.0491781		2.78625	0.837183	0.59918	0.0411502		2.55752	0.740322	0.546963	0.0365403		2.06452	0.544403	0.435469	0.0271501		0.06	1.86118	0.701416	0.12		0.3	0.321128	0.108642	0.008		58.3663	27.8521	11.812	1.96966	0.078769	0.486423
1.2	1307.83	1.8	57.3991	27.3435	11.5301	1.93252	98.2052		3.92097	1.36592	0.860829	0.0661372		3.16515	1.00444	0.685357	0.0491412		2.78352	0.835268	0.597746	0.0411193		2.55502	0.738628	0.545653	0.0365129		2.0625	0.543157	0.434427	0.0271298		0.06	1.85958	0.701441	0.12		0.3	0.321016	0.10848	0.008		58.4481	27.8432	11.7408	1.96784	0.0784735	0.484952
1.2	1308.26	1.9	57.4213	27.307	11.4484	1.92877	98.1055		3.91713	1.3628	0.85877	0.0660877		3.16205	1.00215	0.683718	0.0491044		2.78079	0.833358	0.596316	0.0410885		2.55252	0.736939	0.544348	0.0364855		2.06048	0.541915	0.433388	0.0271095		0.06	1.85798	0.701466	0.12		0.3	0.320904	0.108317	0.008		58.5301	27.8343	11.6695	1.96602	0.0781778	0.483481
1.2	1308.7	2	57.4435	27.2705	11.3668	1.92503	98.0058		3.9133	1.35968	0.856717	0.0660382		3.15895	0.999857	0.682083	0.0490677		2.77807	0.831453	0.594891	0.0410578		2.55002	0.735255	0.543047	0.0364582		2.05846	0.540677	0.432352	0.0270892		0.06	1.85638	0.70149	0.12		0.3	0.320792	0.108155	0.008		58.6123	27.8254	11.5981	1.9642	0.0778819	0.48201
1.2	1309.13	2.1	57.4656	27.234	11.2851	1.92128	97.9061		3.90947	1.35658	0.85467	0.0659888		3.15586	0.997573	0.680453	0.049031		2.77535	0.829554	0.593469	0.0410271		2.54752	0.733575	0.541749	0.036431		2.05645	0.539442	0.431319	0.0270689		0.06	1.85479	0.701515	0.12		0.3	0.32068	0.107993	0.008		58.6947	27.8165	11.5265	1.96237	0.0775858	0.480539
1.2	1309.57	2.2	57.4878	27.1976	11.2034	1.91753	97.8063		3.90565	1.35348	0.852629	0.0659395		3.15278	0.995296	0.678828	0.0489943		2.77264	0.82766	0.592052	0.0409964		2.54503	0.731901	0.540456	0.0364037		2.05444	0.53821	0.430289	0.0270487		0.06	1.85319	0.701539	0.12		0.3	0.320569	0.107832	0.008		58.7772	27.8076	11.4547	1.96054	0.0772895	0.479068
1.2	1310	2.3	57.51	27.1611	11.1218	1.91378	97.7066		3.90183	1.35039	0.850594	0.0658902		3.1497	0.993025	0.677208	0.0489577		2.76993	0.825772	0.590639	0.0409658		2.54254	0.730231	0.539166	0.0363765		2.05243	0.536983	0.429262	0.0270284		0.06	1.8516	0.701564	0.12		0.3	0.320457	0.107671	0.008		58.8598	27.7986	11.3828	1.9587	0.076993	0.477597
1.2	1310.43	2.4	57.5321	27.1246	11.0401	1.91003	97.6069		3.89802	1.34731	0.848565	0.065841		3.14662	0.990761	0.675593	0.0489211		2.76722	0.823889	0.58923	0.0409352		2.54006	0.728566	0.537879	0.0363493		2.05043	0.535758	0.428238	0.0270083		0.06	1.85001	0.701589	0.12		0.3	0.320345	0.10751	0.008		58.9427	27.7896	11.3108	1.95686	0.0766963	0.476126
1.2	1310.87	2.5	57.5543	27.0881	10.9585	1.90628	97.5072		3.89422	1.34424	0.846541	0.0657919		3.14355	0.988502	0.673982	0.0488846		2.76452	0.822011	0.587825	0.0409046		2.53758	0.726905	0.536597	0.0363222		2.04842	0.534537	0.427217	0.0269881		0.06	1.84843	0.701613	0.12		0.3	0.320234	0.10735	0.008		59.0257	27.7807	11.2386	1.95502	0.0763994	0.474654
1.2	1311.3	2.6	57.5765	27.0517	10.8768	1.90253	97.4075		3.89042	1.34118	0.844524	0.0657428		3.14048	0.986251	0.672376	0.0488482		2.76182	0.820139	0.586424	0.0408741		2.53511	0.725249	0.535318	0.0362951		2.04643	0.533319	0.426199	0.026968		0.06	1.84684	0.701638	0.12		0.3	0.320122	0.10719	0.008		59.1089	27.7717	11.1663	1.95317	0.0761023	0.473183
1.2	1311.74	2.7	57.5987	27.0152	10.7951	1.89878	97.3078		3.88662	1.33813	0.842513	0.0656938		3.13742	0.984006	0.670775	0.0488117		2.75913	0.818272	0.585028	0.0408436		2.53263	0.723598	0.534043	0.0362681		2.04443	0.532105	0.425184	0.0269479		0.06	1.84526	0.701662	0.12		0.3	0.320011	0.10703	0.008		59.1922	27.7626	11.0938	1.95132	0.0758051	0.471711
1.2	1312.17	2.8	57.6208	26.9787	10.7135	1.89504	97.2081		3.88284	1.33508	0.840507	0.0656448		3.13436	0.981767	0.669178	0.0487754		2.75644	0.81641	0.583635	0.0408132		2.53017	0.721952	0.532772	0.036241		2.04244	0.530895	0.424172	0.0269278		0.06	1.84368	0.701687	0.12		0.3	0.3199	0.10687	0.008		59.2758	27.7536	11.0212	1.94946	0.0755076	0.470239
1.2	1312.61	2.9	57.643	26.9422	10.6318	1.89129	97.1084		3.87905	1.33205	0.838508	0.0655959		3.13131	0.979534	0.667586	0.048739		2.75376	0.814553	0.582247	0.0407828		2.5277	0.72031	0.531505	0.036214		2.04045	0.529687	0.423162	0.0269077		0.06	1.8421	0.701711	0.12		0.3	0.319789	0.106711	0.008		59.3595	27.7445	10.9484	1.9476	0.0752099	0.468767
1.2	1313.04	3	57.6652	26.9058	10.5502	1.88754	97.0086		3.87528	1.32902	0.836514	0.0655471		3.12826	0.977308	0.665999	0.0487027		2.75108	0.812702	0.580862	0.0407524		2.52524	0.718673	0.530241	0.0361871		2.03846	0.528483	0.422156	0.0268877		0.06	1.84053	0.701735	0.12		0.3	0.319678	0.106553	0.008		59.4433	27.7354	10.8755	1.94574	0.074912	0.467295
1.2	1313.48	3.1	57.6874	26.8693	10.4685	1.88379	96.9089		3.87151	1.326	0.834526	0.0654983		3.12522	0.975088	0.664416	0.0486665		2.7484	0.810856	0.579482	0.0407221		2.52278	0.71704	0.528981	0.0361602		2.03648	0.527283	0.421153	0.0268677		0.06	1.83895	0.70176	0.12		0.3	0.319567	0.106394	0.008		59.5274	27.7263	10.8024	1.94388	0.0746139	0.465823
1.2	1313.91	3.2	57.7095	26.8328	10.3868	1.88004	96.8092		3.86774	1.32299	0.832544	0.0654496		3.12218	0.972874	0.662838	0.0486303		2.74573	0.809015	0.578106	0.0406918		2.52033	0.715413	0.527725	0.0361333		2.0345	0.526086	0.420153	0.0268477		0.06	1.83738	0.701784	0.12		0.3	0.319456	0.106236	0.008		59.6116	27.7172	10.7292	1.94201	0.0743156	0.46435
1.2	1314.35	3.3	57.7317	26.7964	10.3052	1.87629	96.7095		3.86398	1.31999	0.830568	0.065401		3.11914	0.970666	0.661265	0.0485942		2.74306	0.807179	0.576734	0.0406616		2.51788	0.713789	0.526472	0.0361064		2.03252	0.524892	0.419156	0.0268278		0.06	1.83581	0.701809	0.12		0.3	0.319346	0.106078	0.008		59.696	27.7081	10.6558	1.94013	0.0740171	0.462877
1.2	1314.78	3.4	57.7539	26.7599	10.2235	1.87254	96.6098		3.86023	1.31699	0.828598	0.0653524		3.11611	0.968465	0.659696	0.0485581		2.7404	0.805349	0.575365	0.0406314		2.51544	0.71217	0.525223	0.0360796		2.03055	0.523702	0.418161	0.0268078		0.06	1.83425	0.701833	0.12		0.3	0.319235	0.105921	0.008		59.7806	27.6989	10.5823	1.93825	0.0737184	0.461405
1.2	1315.22	3.5	57.776	26.7234	10.1418	1.86879	96.5101		3.85648	1.31401	0.826633	0.0653039		3.11309	0.96627	0.658131	0.048522		2.73774	0.803523	0.574001	0.0406012		2.51299	0.710556	0.523977	0.0360528		2.02858	0.522515	0.41717	0.0267879		0.06	1.83268	0.701858	0.12		0.3	0.319125	0.105763	0.008		59.8653	27.6898	10.5086	1.93637	0.0734194	0.459932
1.2	1315.65	3.6	57.7982	26.6869	10.0602	1.86505	96.4104		3.85274	1.31103	0.824674	0.0652554		3.11007	0.964081	0.656572	0.048486		2.73508	0.801703	0.572641	0.0405711		2.51056	0.708946	0.522736	0.0360261		2.02661	0.521331	0.416181	0.026768		0.06	1.83112	0.701882	0.12		0.3	0.319014	0.105606	0.008		59.9502	27.6806	10.4348	1.93449	0.0731203	0.458458
1.2	1316.09	3.7	57.8204	26.6505	9.97852	1.8613	96.3107		3.84901	1.30806	0.82272	0.065207		3.10705	0.961898	0.655017	0.0484501		2.73243	0.799888	0.571284	0.040541		2.50812	0.707341	0.521498	0.0359993		2.02464	0.520151	0.415195	0.0267482		0.06	1.82956	0.701906	0.12		0.3	0.318904	0.10545	0.008		60.0353	27.6713	10.3608	1.9326	0.0728209	0.456985
1.2	1316.52	3.8	57.8426	26.614	9.89686	1.85755	96.211		3.84527	1.3051	0.820773	0.0651587		3.10404	0.959721	0.653466	0.0484142		2.72978	0.798078	0.569932	0.040511		2.50569	0.705741	0.520263	0.0359727		2.02268	0.518973	0.414212	0.0267284		0.06	1.828	0.701931	0.12		0.3	0.318794	0.105294	0.008		60.1206	27.6621	10.2866	1.9307	0.0725213	0.455511
1.2	1316.96	3.9	57.8647	26.5775	9.8152	1.8538	96.1112		3.84155	1.30215	0.818831	0.0651105		3.10103	0.957551	0.65192	0.0483783		2.72713	0.796273	0.568583	0.040481		2.50326	0.704145	0.519032	0.035946		2.02072	0.5178	0.413232	0.0267086		0.06	1.82644	0.701955	0.12		0.3	0.318684	0.105138	0.008		60.206	27.6529	10.2123	1.92881	0.0722215	0.454038
1.2	1317.39	4	57.8869	26.541	9.73354	1.85005	96.0115		3.83783	1.29921	0.816895	0.0650623		3.09803	0.955386	0.650378	0.0483425		2.72449	0.794473	0.567239	0.040451		2.50084	0.702553	0.517805	0.0359194		2.01877	0.516629	0.412255	0.0266888		0.06	1.82489	0.701979	0.12		0.3	0.318574	0.104982	0.008		60.2916	27.6436	10.1379	1.9269	0.0719215	0.452564
1.2	1317.83	4.1	57.9091	26.5046	9.65187	1.8463	95.9118		3.83412	1.29627	0.814964	0.0650141		3.09503	0.953228	0.648841	0.0483067		2.72186	0.792678	0.565898	0.0404211		2.49842	0.700966	0.516581	0.0358928		2.01681	0.515462	0.411281	0.0266691		0.06	1.82334	0.702004	0.12		0.3	0.318464	0.104827	0.008		60.3774	27.6343	10.0633	1.925	0.0716213	0.451089
1.2	1318.26	4.2	57.9313	26.4681	9.57021	1.84255	95.8121		3.83041	1.29335	0.813039	0.064966		3.09204	0.951075	0.647309	0.048271		2.71923	0.790888	0.564562	0.0403912		2.496	0.699383	0.515361	0.0358663		2.01486	0.514298	0.410309	0.0266493		0.06	1.82179	0.702028	0.12		0.3	0.318354	0.104672	0.008		60.4634	27.625	9.98852	1.92309	0.0713208	0.449615
1.2	1318.7	4.3	57.9534	26.4316	9.48855	1.8388	95.7124		3.82671	1.29043	0.811119	0.064918		3.08905	0.948929	0.64578	0.0482353		2.7166	0.789103	0.563229	0.0403613		2.49359	0.697805	0.514144	0.0358398		2.01291	0.513138	0.409341	0.0266296		0.06	1.82024	0.702052	0.12		0.3	0.318244	0.104517	0.008		60.5496	27.6157	9.91361	1.92118	0.0710201	0.44814
1.2	1319.13	4.4	57.9756	26.3951	9.40689	1.83506	95.6127		3.82301	1.28752	0.809206	0.0648701		3.08607	0.946789	0.644257	0.0481997		2.71397	0.787323	0.5619	0.0403315		2.49118	0.696231	0.512931	0.0358133		2.01097	0.51198	0.408375	0.02661		0.06	1.8187	0.702077	0.12		0.3	0.318135	0.104363	0.008		60.6359	27.6063	9.83854	1.91926	0.0707192	0.446665
1.2	1319.57	4.5	57.9978	26.3587	9.32523	1.83131	95.513		3.81932	1.28461	0.807297	0.0648222		3.08309	0.944654	0.642737	0.0481641		2.71135	0.785548	0.560575	0.0403017		2.48878	0.694661	0.511721	0.0357869		2.00903	0.510826	0.407412	0.0265903		0.06	1.81715	0.702101	0.12		0.3	0.318025	0.104209	0.008		60.7224	27.5969	9.76331	1.91734	0.0704181	0.44519
1.2	1320	4.6	58.0199	26.3222	9.24357	1.82756	95.4133		3.81563	1.28172	0.805395	0.0647743		3.08011	0.942526	0.641222	0.0481286		2.70874	0.783779	0.559253	0.040272		2.48638	0.693096	0.510515	0.0357604		2.00709	0.509675	0.406451	0.0265707		0.06	1.81561	0.702125	0.12		0.3	0.317916	0.104055	0.008		60.8091	27.5876	9.68793	1.91541	0.0701167	0.443715
1.2	1320.43	4.7	58.0421	26.2857	9.1619	1.82381	95.3135		3.81195	1.27883	0.803497	0.0647266		3.07714	0.940404	0.639712	0.0480931		2.70612	0.782014	0.557936	0.0402423		2.48398	0.691535	0.509313	0.0357341		2.00515	0.508527	0.405494	0.0265511		0.06	1.81408	0.70215	0.12		0.3	0.317807	0.103902	0.008		60.896	27.5782	9.61238	1.91348	0.0698151	0.442239
1.2	1320.87	4.8	58.0643	26.2492	9.08024	1.82006	95.2138		3.80828	1.27596	0.801605	0.0646788		3.07418	0.938287	0.638206	0.0480576		2.70351	0.780254	0.556622	0.0402126		2.48158	0.689979	0.508113	0.0357077		2.00322	0.507383	0.404539	0.0265315		0.06	1.81254	0.702174	0.12		0.3	0.317697	0.103749	0.008		60.983	27.5687	9.53668	1.91155	0.0695133	0.440763
1.2	1321.3	4.9	58.0865	26.2128	8.99858	1.81631	95.1141		3.80461	1.27309	0.799719	0.0646312		3.07121	0.936177	0.636704	0.0480222		2.70091	0.778499	0.555313	0.040183		2.47919	0.688427	0.506918	0.0356814		2.00129	0.506242	0.403587	0.026512		0.06	1.811	0.702198	0.12		0.3	0.317588	0.103596	0.008		61.0703	27.5593	9.46083	1.90961	0.0692112	0.439287
1.2	1321.74	5	58.1086	26.1763	8.91692	1.81256	95.0144		3.80095	1.27022	0.797838	0.0645836		3.06826	0.934072	0.635207	0.0479869		2.69831	0.776748	0.554007	0.0401534		2.4768	0.686879	0.505726	0.0356552		1.99936	0.505103	0.402638	0.0264925		0.06	1.80947	0.702222	0.12		0.3	0.317479	0.103443	0.008		61.1577	27.5498	9.38481	1.90767	0.0689089	0.43781
1.2	1322.17	5.1	58.1308	26.1398	8.83526	1.80881	94.9147		3.79729	1.26737	0.795963	0.0645361		3.0653	0.931973	0.633713	0.0479515		2.69571	0.775003	0.552704	0.0401238		2.47442	0.685336	0.504537	0.0356289		1.99744	0.503969	0.401692	0.026473		0.06	1.80794	0.702246	0.12		0.3	0.31737	0.103291	0.008		61.2453	27.5403	9.30863	1.90573	0.0686064	0.436333
1.2	1322.61	5.2	58.153	26.1033	8.7536	1.80507	94.815		3.79364	1.26452	0.794093	0.0644886		3.06236	0.92988	0.632225	0.0479163		2.69312	0.773263	0.551406	0.0400943		2.47204	0.683797	0.503352	0.0356027		1.99552	0.502837	0.400748	0.0264535		0.06	1.80641	0.702271	0.12		0.3	0.317262	0.103139	0.008		61.3331	27.5308	9.23229	1.90378	0.0683036	0.434856
1.2	1323.04	5.3	58.1752	26.0669	8.67194	1.80132	94.7153		3.78999	1.26169	0.792229	0.0644412		3.05941	0.927793	0.63074	0.0478811		2.69053	0.771527	0.550111	0.0400649		2.46966	0.682262	0.50217	0.0355765		1.9936	0.501708	0.399807	0.026434		0.06	1.80489	0.702295	0.12		0.3	0.317153	0.102988	0.008		61.4211	27.5213	9.15579	1.90182	0.0680006	0.433379
1.2	1323.48	5.4	58.1973	26.0304	8.59027	1.79757	94.6156		3.78635	1.25886	0.790369	0.0643939		3.05647	0.925712	0.62926	0.0478459		2.68795	0.769796	0.54882	0.0400354		2.46729	0.680732	0.500991	0.0355504		1.99168	0.500583	0.398869	0.0264146		0.06	1.80336	0.702319	0.12		0.3	0.317044	0.102837	0.008		61.5093	27.5117	9.07913	1.89987	0.0676973	0.431901
1.2	1323.91	5.5	58.2195	25.9939	8.50861	1.79382	94.5159		3.78271	1.25603	0.788516	0.0643466		3.05354	0.923636	0.627784	0.0478107		2.68537	0.76807	0.547533	0.040006		2.46492	0.679205	0.499816	0.0355243		1.98977	0.49946	0.397933	0.0263952		0.06	1.80184	0.702343	0.12		0.3	0.316936	0.102686	0.008		61.5976	27.5022	9.00231	1.8979	0.0673938	0.430423
1.2	1324.35	5.6	58.2417	25.9574	8.42695	1.79007	94.4161		3.77908	1.25322	0.786667	0.0642994		3.05061	0.921567	0.626312	0.0477756		2.68279	0.766349	0.54625	0.0399767		2.46256	0.677683	0.498645	0.0354982		1.98786	0.498341	0.397001	0.0263759		0.06	1.80032	0.702367	0.12		0.3	0.316827	0.102535	0.008		61.6861	27.4926	8.92533	1.89594	0.0670901	0.428945
1.2	1324.78	5.7	58.2638	25.921	8.34529	1.78632	94.3164		3.77546	1.25041	0.784824	0.0642522		3.04768	0.919503	0.624845	0.0477406		2.68021	0.764633	0.54497	0.0399473		2.4602	0.676166	0.497476	0.0354722		1.98596	0.497225	0.39607	0.0263565		0.06	1.79881	0.702391	0.12		0.3	0.316719	0.102385	0.008		61.7749	27.483	8.84818	1.89397	0.0667861	0.427466
1.2	1325.22	5.8	58.286	25.8845	8.26363	1.78257	94.2167		3.77184	1.24761	0.782986	0.0642051		3.04476	0.917445	0.623382	0.0477056		2.67765	0.762921	0.543694	0.0399181		2.45784	0.674652	0.496311	0.0354462		1.98405	0.496112	0.395143	0.0263372		0.06	1.79729	0.702415	0.12		0.3	0.316611	0.102235	0.008		61.8638	27.4734	8.77087	1.89199	0.0664819	0.425987
1.2	1325.65	5.9	58.3082	25.848	8.18197	1.77882	94.117		3.76822	1.24482	0.781154	0.064158		3.04184	0.915392	0.621923	0.0476707		2.67508	0.761215	0.542421	0.0398888		2.45548	0.673143	0.49515	0.0354202		1.98215	0.495002	0.394218	0.0263179		0.06	1.79578	0.70244	0.12		0.3	0.316503	0.102085	0.008		61.9529	27.4637	8.6934	1.89001	0.0661774	0.424508
1.2	1326.09	6	58.3304	25.8116	8.1003	1.77508	94.0173		3.76462	1.24204	0.779327	0.0641111		3.03893	0.913345	0.620468	0.0476357		2.67252	0.759513	0.541152	0.0398596		2.45313	0.671638	0.493992	0.0353943		1.98025	0.493895	0.393296	0.0262986		0.06	1.79427	0.702464	0.12		0.3	0.316395	0.101935	0.008		62.0422	27.454	8.61576	1.88803	0.0658726	0.423028
1.2	1326.52	6.1	58.3525	25.7751	8.01864	1.77133	93.9176		3.76101	1.23926	0.777505	0.0640641		3.03602	0.911304	0.619018	0.0476009		2.66996	0.757815	0.539887	0.0398304		2.45078	0.670137	0.492837	0.0353684		1.97836	0.492792	0.392377	0.0262794		0.06	1.79276	0.702488	0.12		0.3	0.316287	0.101786	0.008		62.1316	27.4444	8.53796	1.88604	0.0655676	0.421548
1.2	1326.96	6.2	58.3747	25.7386	7.93698	1.76758	93.8179		3.75741	1.23649	0.775688	0.0640173		3.03312	0.909269	0.617571	0.0475661		2.66741	0.756123	0.538626	0.0398013		2.44844	0.66864	0.491685	0.0353425		1.97646	0.491691	0.39146	0.0262601		0.06	1.79125	0.702512	0.12		0.3	0.316179	0.101637	0.008		62.2213	27.4346	8.45999	1.88405	0.0652624	0.420067
1.2	1327.39	6.3	58.3969	25.7021	7.85532	1.76383	93.7182		3.75382	1.23373	0.773877	0.0639705		3.03022	0.907239	0.616129	0.0475313		2.66486	0.754435	0.537368	0.0397722		2.4461	0.667147	0.490537	0.0353167		1.97457	0.490593	0.390546	0.0262409		0.06	1.78975	0.702536	0.12		0.3	0.316071	0.101489	0.008		62.3112	27.4249	8.38185	1.88206	0.0649569	0.418586
1.2	1327.83	6.4	58.4191	25.6657	7.77366	1.76008	93.6184		3.75023	1.23098	0.77207	0.0639237		3.02732	0.905215	0.614691	0.0474965		2.66231	0.752752	0.536114	0.0397431		2.44376	0.665659	0.489392	0.0352908		1.97269	0.489499	0.389634	0.0262218		0.06	1.78824	0.70256	0.12		0.3	0.315963	0.101341	0.008		62.4012	27.4152	8.30355	1.88006	0.0646511	0.417105
1.2	1328.26	6.5	58.4412	25.6292	7.692	1.75633	93.5187		3.74665	1.22824	0.770269	0.063877		3.02443	0.903196	0.613257	0.0474619		2.65977	0.751073	0.534863	0.0397141		2.44143	0.664174	0.48825	0.0352651		1.9708	0.488407	0.388725	0.0262026		0.06	1.78674	0.702584	0.12		0.3	0.315856	0.101193	0.008		62.4915	27.4054	8.22509	1.87805	0.0643451	0.415624
1.2	1328.7	6.6	58.4634	25.5927	7.61033	1.75258	93.419		3.74308	1.2255	0.768474	0.0638304		3.02154	0.901183	0.611827	0.0474272		2.65723	0.749399	0.533616	0.0396851		2.43909	0.662694	0.487112	0.0352393		1.96892	0.487319	0.387819	0.0261835		0.06	1.78524	0.702608	0.12		0.3	0.315748	0.101045	0.008		62.5819	27.3956	8.14645	1.87605	0.0640388	0.414142
1.2	1329.13	6.7	58.4856	25.5562	7.52867	1.74883	93.3193		3.73951	1.22277	0.766683	0.0637838		3.01866	0.899176	0.610402	0.0473926		2.65469	0.74773	0.532373	0.0396562		2.43677	0.661218	0.485977	0.0352136		1.96704	0.486233	0.386915	0.0261644		0.06	1.78375	0.702632	0.12		0.3	0.315641	0.100898	0.008		62.6725	27.3858	8.06765	1.87403	0.0637323	0.412659
1.2	1329.57	6.8	58.5077	25.5198	7.44701	1.74509	93.2196		3.73594	1.22005	0.764897	0.0637373		3.01578	0.897174	0.60898	0.0473581		2.65216	0.746065	0.531133	0.0396272		2.43444	0.659746	0.484845	0.0351879		1.96517	0.485151	0.386014	0.0261453		0.06	1.78225	0.702656	0.12		0.3	0.315534	0.100751	0.008		62.7634	27.376	7.98868	1.87202	0.0634255	0.411176
1.2	1330	6.9	58.5299	25.4833	7.36535	1.74134	93.1199		3.73238	1.21733	0.763117	0.0636909		3.01291	0.895178	0.607563	0.0473236		2.64963	0.744405	0.529896	0.0395984		2.43212	0.658278	0.483717	0.0351623		1.9633	0.484071	0.385116	0.0261263		0.06	1.78076	0.70268	0.12		0.3	0.315426	0.100604	0.008		62.8544	27.3661	7.90953	1.87	0.0631184	0.409693
1.2	1330.43	7	58.5521	25.4468	7.28369	1.73759	93.0202		3.72882	1.21463	0.761341	0.0636445		3.01004	0.893187	0.606149	0.0472891		2.64711	0.74275	0.528664	0.0395695		2.42981	0.656814	0.482591	0.0351367		1.96143	0.482995	0.38422	0.0261072		0.06	1.77927	0.702704	0.12		0.3	0.315319	0.100457	0.008		62.9456	27.3562	7.83022	1.86797	0.0628111	0.40821
1.2	1330.87	7.1	58.5743	25.4103	7.20203	1.73384	92.9205		3.72528	1.21193	0.759571	0.0635982		3.00717	0.891202	0.60474	0.0472547		2.64459	0.741099	0.527434	0.0395407		2.4275	0.655354	0.481469	0.0351111		1.95956	0.481921	0.383326	0.0260882		0.06	1.77778	0.702728	0.12		0.3	0.315212	0.100311	0.008		63.037	27.3463	7.75074	1.86594	0.0625035	0.406726
1.2	1331.3	7.2	58.5964	25.3739	7.12036	1.73009	92.8208		3.72173	1.20923	0.757806	0.0635519		3.00431	0.889222	0.603334	0.0472203		2.64207	0.739453	0.526209	0.039512		2.42519	0.653898	0.48035	0.0350856		1.95769	0.480851	0.382435	0.0260692		0.06	1.7763	0.702752	0.12		0.3	0.315105	0.100165	0.008		63.1286	27.3364	7.67109	1.86391	0.0621956	0.405241
1.2	1331.74	7.3	58.6186	25.3374	7.0387	1.72634	92.721		3.71819	1.20655	0.756046	0.0635057		3.00145	0.887248	0.601933	0.0471859		2.63956	0.737811	0.524987	0.0394832		2.42288	0.652447	0.479235	0.0350601		1.95583	0.479783	0.381547	0.0260503		0.06	1.77481	0.702776	0.12		0.3	0.314999	0.10002	0.008		63.2204	27.3265	7.59127	1.86187	0.0618874	0.403756
1.2	1332.17	7.4	58.6408	25.3009	6.95704	1.72259	92.6213		3.71466	1.20387	0.754291	0.0634595		2.9986	0.885279	0.600536	0.0471516		2.63705	0.736174	0.523768	0.0394545		2.42058	0.650999	0.478122	0.0350346		1.95397	0.478719	0.380661	0.0260314		0.06	1.77333	0.7028	0.12		0.3	0.314892	0.0998743	0.008		63.3124	27.3165	7.51127	1.85982	0.061579	0.402271
1.2	1332.61	7.5	58.663	25.2644	6.87538	1.71884	92.5216		3.71113	1.2012	0.752541	0.0634134		2.99575	0.883316	0.599142	0.0471174		2.63455	0.734541	0.522553	0.0394259		2.41828	0.649555	0.477013	0.0350091		1.95212	0.477657	0.379778	0.0260125		0.06	1.77185	0.702824	0.12		0.3	0.314785	0.0997293	0.008		63.4046	27.3065	7.43111	1.85778	0.0612703	0.400785
1.2	1333.04	7.6	58.6851	25.228	6.79372	1.7151	92.4219		3.70761	1.19854	0.750796	0.0633674		2.99291	0.881358	0.597753	0.0470832		2.63205	0.732913	0.521341	0.0393972		2.41598	0.648115	0.475907	0.0349837		1.95026	0.476598	0.378898	0.0259936		0.06	1.77037	0.702848	0.12		0.3	0.314679	0.0995845	0.008		63.497	27.2965	7.35077	1.85572	0.0609613	0.399299
1.2	1333.48	7.7	58.7073	25.1915	6.71206	1.71135	92.3222		3.70409	1.19588	0.749056	0.0633214		2.99007	0.879405	0.596368	0.047049		2.62955	0.731289	0.520133	0.0393687		2.41369	0.646679	0.474804	0.0349583		1.94841	0.475542	0.378019	0.0259747		0.06	1.76889	0.702871	0.12		0.3	0.314572	0.0994401	0.008		63.5896	27.2865	7.27025	1.85367	0.0606521	0.397812
1.2	1333.91	7.8	58.7295	25.155	6.6304	1.7076	92.2225		3.70058	1.19324	0.747321	0.0632755		2.98723	0.877458	0.594986	0.0470149		2.62706	0.72967	0.518928	0.0393401		2.4114	0.645247	0.473704	0.034933		1.94657	0.474489	0.377144	0.0259559		0.06	1.76742	0.702895	0.12		0.3	0.314466	0.0992959	0.008		63.6824	27.2764	7.18956	1.85161	0.0603425	0.396325
1.2	1334.35	7.9	58.7516	25.1185	6.54873	1.70385	92.1228		3.69707	1.1906	0.74559	0.0632296		2.9844	0.875516	0.593609	0.0469808		2.62457	0.728055	0.517726	0.0393116		2.40911	0.643819	0.472607	0.0349077		1.94472	0.473439	0.376271	0.0259371		0.06	1.76595	0.702919	0.12		0.3	0.31436	0.099152	0.008		63.7754	27.2664	7.1087	1.84954	0.0600327	0.394837
1.2	1334.78	8	58.7738	25.0821	6.46707	1.7001	92.0231		3.69357	1.18796	0.743865	0.0631838		2.98158	0.87358	0.592235	0.0469468		2.62208	0.726445	0.516528	0.0392831		2.40683	0.642395	0.471514	0.0348824		1.94288	0.472392	0.3754	0.0259183		0.06	1.76448	0.702943	0.12		0.3	0.314254	0.0990085	0.008		63.8686	27.2563	7.02766	1.84747	0.0597226	0.393349
1.2	1335.22	8.1	58.796	25.0456	6.38541	1.69635	91.9233		3.69007	1.18534	0.742145	0.0631381		2.97875	0.871648	0.590866	0.0469128		2.6196	0.724839	0.515334	0.0392547		2.40455	0.640975	0.470423	0.0348571		1.94104	0.471348	0.374532	0.0258995		0.06	1.76301	0.702967	0.12		0.3	0.314148	0.0988652	0.008		63.962	27.2462	6.94645	1.8454	0.0594122	0.39186
1.2	1335.65	8.2	58.8182	25.0091	6.30375	1.6926	91.8236		3.68658	1.18272	0.74043	0.0630924		2.97593	0.869722	0.5895	0.0468789		2.61712	0.723237	0.514143	0.0392263		2.40228	0.639559	0.469336	0.0348319		1.9392	0.470306	0.373666	0.0258808		0.06	1.76155	0.702991	0.12		0.3	0.314042	0.0987221	0.008		64.0556	27.236	6.86506	1.84332	0.0591016	0.390371
1.2	1336.09	8.3	58.8403	24.9726	6.22209	1.68886	91.7239		3.68309	1.1801	0.738719	0.0630468		2.97312	0.867802	0.588138	0.046845		2.61464	0.72164	0.512955	0.0391979		2.40001	0.638147	0.468252	0.0348067		1.93737	0.469268	0.372803	0.025862		0.06	1.76008	0.703014	0.12		0.3	0.313936	0.0985794	0.008		64.1494	27.2259	6.78349	1.84124	0.0587906	0.388881
1.2	1336.52	8.4	58.8625	24.9362	6.14043	1.68511	91.6242		3.67961	1.1775	0.737013	0.0630012		2.97031	0.865887	0.58678	0.0468111		2.61217	0.720047	0.511771	0.0391696		2.39774	0.636738	0.467171	0.0347815		1.93554	0.468232	0.371942	0.0258433		0.06	1.75862	0.703038	0.12		0.3	0.31383	0.098437	0.008		64.2434	27.2157	6.70175	1.83915	0.0584793	0.387391
1.2	1336.96	8.5	58.8847	24.8997	6.05876	1.68136	91.5245		3.67613	1.1749	0.735313	0.0629557		2.9675	0.863977	0.585426	0.0467773		2.6097	0.718459	0.51059	0.0391413		2.39547	0.635334	0.466092	0.0347564		1.93371	0.467199	0.371084	0.0258247		0.06	1.75716	0.703062	0.12		0.3	0.313724	0.0982948	0.008		64.3376	27.2055	6.61983	1.83706	0.0581678	0.3859
1.2	1337.39	8.6	58.9069	24.8632	5.9771	1.67761	91.4248		3.67266	1.17231	0.733617	0.0629102		2.9647	0.862072	0.584076	0.0467435		2.60724	0.716875	0.509412	0.039113		2.39321	0.633933	0.465017	0.0347313		1.93188	0.466169	0.370228	0.025806		0.06	1.7557	0.703086	0.12		0.3	0.313619	0.0981529	0.008		64.432	27.1953	6.53773	1.83496	0.0578559	0.384408
1.2	1337.83	8.7	58.929	24.8267	5.89544	1.67386	91.3251		3.66919	1.16973	0.731926	0.0628648		2.9619	0.860172	0.582729	0.0467098		2.60478	0.715295	0.508238	0.0390848		2.39095	0.632536	0.463946	0.0347062		1.93006	0.465142	0.369375	0.0257874		0.06	1.75425	0.70311	0.12		0.3	0.313513	0.0980113	0.008		64.5267	27.185	6.45545	1.83286	0.0575438	0.382917
1.2	1338.26	8.8	58.9512	24.7903	5.81378	1.67011	91.2254		3.66573	1.16715	0.730239	0.0628195		2.95911	0.858278	0.581387	0.0466761		2.60232	0.71372	0.507067	0.0390566		2.3887	0.631143	0.462877	0.0346812		1.92824	0.464117	0.368524	0.0257688		0.06	1.75279	0.703133	0.12		0.3	0.313408	0.09787	0.008		64.6215	27.1748	6.37299	1.83075	0.0572313	0.381424
1.2	1338.7	8.9	58.9734	24.7538	5.73212	1.66636	91.1257		3.66228	1.16458	0.728558	0.0627742		2.95632	0.856389	0.580048	0.0466424		2.59987	0.712149	0.505899	0.0390284		2.38644	0.629754	0.461811	0.0346562		1.92642	0.463096	0.367675	0.0257502		0.06	1.75134	0.703157	0.12		0.3	0.313302	0.0977289	0.008		64.7165	27.1645	6.29034	1.82864	0.0569186	0.379931
1.2	1339.13	9	58.9955	24.7173	5.65046	1.66261	91.0259		3.65883	1.16202	0.726881	0.062729		2.95353	0.854505	0.578713	0.0466088		2.59742	0.710582	0.504735	0.0390003		2.3842	0.628368	0.460748	0.0346312		1.92461	0.462077	0.366829	0.0257317		0.06	1.74989	0.703181	0.12		0.3	0.313197	0.0975882	0.008		64.8118	27.1542	6.20752	1.82653	0.0566056	0.378438
1.2	1339.57	9.1	59.0177	24.6809	5.56879	1.65887	90.9262		3.65538	1.15947	0.725209	0.0626838		2.95075	0.852626	0.577382	0.0465753		2.59497	0.70902	0.503574	0.0389722		2.38195	0.626987	0.459688	0.0346063		1.92279	0.461061	0.365985	0.0257131		0.06	1.74844	0.703205	0.12		0.3	0.313092	0.0974477	0.008		64.9073	27.1438	6.12452	1.82441	0.0562922	0.376944
1.2	1340	9.2	59.0399	24.6444	5.48713	1.65512	90.8265		3.65194	1.15692	0.723542	0.0626387		2.94797	0.850752	0.576055	0.0465417		2.59253	0.707462	0.502416	0.0389442		2.37971	0.625609	0.458631	0.0345814		1.92098	0.460048	0.365144	0.0256946		0.06	1.747	0.703228	0.12		0.3	0.312987	0.0973075	0.008		65.0029	27.1335	6.04133	1.82228	0.0559786	0.375449
1.2	1340.43	9.3	59.0621	24.6079	5.40547	1.65137	90.7268		3.64851	1.15438	0.721879	0.0625936		2.9452	0.848883	0.574731	0.0465083		2.59009	0.705908	0.501262	0.0389162		2.37747	0.624235	0.457578	0.0345565		1.91918	0.459037	0.364305	0.0256762		0.06	1.74555	0.703252	0.12		0.3	0.312882	0.0971676	0.008		65.0988	27.1231	5.95796	1.82015	0.0556646	0.373954
1.2	1340.87	9.4	59.0842	24.5714	5.32381	1.64762	90.6271		3.64508	1.15184	0.720222	0.0625486		2.94243	0.84702	0.573411	0.0464748		2.58766	0.704358	0.500111	0.0388882		2.37523	0.622865	0.456527	0.0345317		1.91737	0.45803	0.363468	0.0256577		0.06	1.74411	0.703276	0.12		0.3	0.312777	0.0970279	0.008		65.1949	27.1127	5.87441	1.81802	0.0553503	0.372458
1.2	1341.3	9.5	59.1064	24.535	5.24215	1.64387	90.5274		3.64165	1.14932	0.718569	0.0625037		2.93967	0.845161	0.572095	0.0464414		2.58522	0.702813	0.498963	0.0388602		2.373	0.621498	0.455479	0.0345069		1.91557	0.457025	0.362634	0.0256393		0.06	1.74267	0.703299	0.12		0.3	0.312672	0.0968885	0.008		65.2912	27.1022	5.79068	1.81588	0.0550358	0.370961
1.2	1341.74	9.6	59.1286	24.4985	5.16049	1.64012	90.4277		3.63823	1.1468	0.71692	0.0624588		2.93691	0.843308	0.570783	0.0464081		2.5828	0.701272	0.497818	0.0388323		2.37077	0.620135	0.454434	0.0344821		1.91377	0.456023	0.361802	0.0256208		0.06	1.74123	0.703323	0.12		0.3	0.312568	0.0967494	0.008		65.3877	27.0918	5.70676	1.81374	0.0547209	0.369464
1.2	1342.17	9.7	59.1508	24.462	5.07882	1.63637	90.328		3.63481	1.14428	0.715276	0.0624139		2.93415	0.84146	0.569474	0.0463748		2.58037	0.699735	0.496677	0.0388045		2.36855	0.618776	0.453392	0.0344573		1.91198	0.455023	0.360972	0.0256025		0.06	1.7398	0.703347	0.12		0.3	0.312463	0.0966106	0.008		65.4844	27.0813	5.62265	1.81159	0.0544057	0.367966
1.2	1342.61	9.8	59.1729	24.4255	4.99716	1.63262	90.2282		3.6314	1.14178	0.713637	0.0623692		2.9314	0.839617	0.568169	0.0463415		2.57795	0.698202	0.495539	0.0387766		2.36633	0.617421	0.452353	0.0344326		1.91018	0.454026	0.360145	0.0255841		0.06	1.73836	0.70337	0.12		0.3	0.312359	0.096472	0.008		65.5814	27.0708	5.53836	1.80944	0.0540901	0.366468
1.2	1343.04	9.9	59.1951	24.3891	4.9155	1.62888	90.1285		3.628	1.13928	0.712003	0.0623244		2.92865	0.837778	0.566868	0.0463083		2.57553	0.696673	0.494404	0.0387488		2.36411	0.616069	0.451317	0.0344079		1.90839	0.453032	0.35932	0.0255657		0.06	1.73693	0.703394	0.12		0.3	0.312254	0.0963338	0.008		65.6785	27.0603	5.45388	1.80728	0.0537743	0.364969
1.2	1343.48	10	59.2173	24.3526	4.83384	1.62513	90.0288		3.6246	1.13678	0.710373	0.0622798		2.9259	0.835945	0.56557	0.0462751		2.57312	0.695149	0.493272	0.038721		2.36189	0.614721	0.450284	0.0343833		1.9066	0.452041	0.358498	0.0255474		0.06	1.7355	0.703417	0.12		0.3	0.31215	0.0961958	0.008		65.7759	27.0498	5.36921	1.80512	0.0534581	0.36347
1.2	1343.91	10.1	59.2394	24.3161	4.75218	1.62138	89.9291		3.6212	1.1343	0.708748	0.0622352		2.92316	0.834117	0.564276	0.0462419		2.57071	0.693629	0.492144	0.0386933		2.35968	0.613376	0.449254	0.0343586		1.90482	0.451052	0.357678	0.0255291		0.06	1.73407	0.703441	0.12		0.3	0.312046	0.096058	0.008		65.8735	27.0392	5.28436	1.80295	0.0531417	0.361969
1.2	1344.35	10.2	59.2616	24.2796	4.67052	1.61763	89.8294		3.61781	1.13182	0.707127	0.0621906		2.92043	0.832294	0.562986	0.0462088		2.5683	0.692113	0.491018	0.0386656		2.35747	0.612036	0.448227	0.034334		1.90303	0.450067	0.35686	0.0255108		0.06	1.73264	0.703465	0.12		0.3	0.311942	0.0959206	0.008		65.9713	27.0286	5.19932	1.80078	0.0528249	0.360468
1.2	1344.78	10.3	59.2838	24.2432	4.58886	1.61388	89.7297		3.61443	1.12935	0.705511	0.0621461		2.91769	0.830476	0.561699	0.0461758		2.5659	0.690601	0.489896	0.0386379		2.35527	0.610699	0.447202	0.0343095		1.90125	0.449083	0.356044	0.0254926		0.06	1.73122	0.703488	0.12		0.3	0.311838	0.0957834	0.008		66.0693	27.018	5.11409	1.7986	0.0525077	0.358967
1.2	1345.22	10.4	59.306	24.2067	4.50719	1.61013	89.63		3.61105	1.12688	0.7039	0.0621017		2.91497	0.828662	0.560416	0.0461427		2.5635	0.689093	0.488777	0.0386103		2.35306	0.609365	0.446181	0.0342849		1.89947	0.448103	0.355231	0.0254744		0.06	1.7298	0.703512	0.12		0.3	0.311734	0.0956464	0.008		66.1676	27.0074	5.02867	1.79642	0.0521903	0.357465
1.2	1345.65	10.5	59.3281	24.1702	4.42553	1.60638	89.5303		3.60767	1.12442	0.702293	0.0620573		2.91224	0.826854	0.559137	0.0461098		2.5611	0.687589	0.487661	0.0385827		2.35086	0.608035	0.445162	0.0342604		1.8977	0.447125	0.35442	0.0254562		0.06	1.72838	0.703535	0.12		0.3	0.31163	0.0955098	0.008		66.266	26.9967	4.94306	1.79423	0.0518725	0.355962
1.2	1346.09	10.6	59.3503	24.1337	4.34387	1.60263	89.4306		3.6043	1.12197	0.70069	0.062013		2.90952	0.82505	0.557861	0.0460768		2.55871	0.686089	0.486548	0.0385552		2.34867	0.606709	0.444146	0.034236		1.89593	0.44615	0.353611	0.025438		0.06	1.72696	0.703559	0.12		0.3	0.311526	0.0953734	0.008		66.3647	26.986	4.85726	1.79204	0.0515544	0.354458
1.2	1346.52	10.7	59.3725	24.0973	4.26221	1.59889	89.3308		3.60094	1.11952	0.699092	0.0619687		2.9068	0.823252	0.556589	0.0460439		2.55632	0.684593	0.485439	0.0385276		2.34647	0.605387	0.443133	0.0342115		1.89416	0.445177	0.352805	0.0254198		0.06	1.72554	0.703582	0.12		0.3	0.311422	0.0952373	0.008		66.4636	26.9753	4.77126	1.78985	0.0512359	0.352954
1.2	1346.96	10.8	59.3947	24.0608	4.18055	1.59514	89.2311		3.59758	1.11708	0.697499	0.0619245		2.90409	0.821458	0.55532	0.0460111		2.55394	0.683102	0.484332	0.0385001		2.34428	0.604068	0.442123	0.0341871		1.89239	0.444207	0.352001	0.0254017		0.06	1.72413	0.703606	0.12		0.3	0.311319	0.0951014	0.008		66.5627	26.9646	4.68508	1.78765	0.0509172	0.351449
1.2	1347.39	10.9	59.4168	24.0243	4.09889	1.59139	89.1314		3.59422	1.11465	0.69591	0.0618803		2.90138	0.819669	0.554055	0.0459783		2.55156	0.681614	0.483229	0.0384727		2.3421	0.602752	0.441116	0.0341627		1.89062	0.44324	0.351199	0.0253836		0.06	1.72271	0.703629	0.12		0.3	0.311215	0.0949658	0.008		66.662	26.9538	4.5987	1.78544	0.050598	0.349943
1.2	1347.83	11	59.439	23.9878	4.01722	1.58764	89.0317		3.59087	1.11222	0.694326	0.0618362		2.89868	0.817885	0.552794	0.0459455		2.54918	0.680131	0.482129	0.0384453		2.33992	0.60144	0.440112	0.0341384		1.88886	0.442275	0.350399	0.0253655		0.06	1.7213	0.703653	0.12		0.3	0.311112	0.0948305	0.008		66.7616	26.943	4.51213	1.78323	0.0502786	0.348437
1.2	1348.26	11.1	59.4612	23.9514	3.93556	1.58389	88.932		3.58753	1.10981	0.692746	0.0617921		2.89598	0.816106	0.551536	0.0459127		2.5468	0.678651	0.481032	0.0384179		2.33774	0.600132	0.43911	0.0341141		1.8871	0.441313	0.349602	0.0253474		0.06	1.71989	0.703676	0.12		0.3	0.311008	0.0946955	0.008		66.8614	26.9322	4.42536	1.78101	0.0499588	0.34693
1.2	1348.7	11.2	59.4833	23.9149	3.8539	1.58014	88.8323		3.58419	1.10739	0.69117	0.0617482		2.89328	0.814332	0.550281	0.0458801		2.54443	0.677176	0.479938	0.0383905		2.33556	0.598827	0.438112	0.0340898		1.88534	0.440354	0.348807	0.0253293		0.06	1.71849	0.7037	0.12		0.3	0.310905	0.0945607	0.008		66.9614	26.9214	4.3384	1.77879	0.0496387	0.345422
1.2	1349.13	11.3	59.5055	23.8784	3.77224	1.57639	88.7326		3.58085	1.10499	0.689599	0.0617042		2.89059	0.812563	0.549031	0.0458474		2.54206	0.675704	0.478847	0.0383632		2.33338	0.597526	0.437116	0.0340655		1.88359	0.439397	0.348014	0.0253113		0.06	1.71708	0.703723	0.12		0.3	0.310802	0.0944261	0.008		67.0616	26.9105	4.25125	1.77657	0.0493182	0.343913
1.2	1349.57	11.4	59.5277	23.8419	3.69058	1.57264	88.6329		3.57752	1.10259	0.688032	0.0616603		2.8879	0.810798	0.547783	0.0458148		2.5397	0.674237	0.477759	0.0383359		2.33121	0.596228	0.436123	0.0340413		1.88184	0.438442	0.347223	0.0252933		0.06	1.71568	0.703747	0.12		0.3	0.310699	0.0942919	0.008		67.1621	26.8997	4.16389	1.77434	0.0489974	0.342404
1.2	1350	11.5	59.5499	23.8055	3.60892	1.5689	88.5331		3.5742	1.10019	0.68647	0.0616165		2.88522	0.809038	0.546539	0.0457822		2.53734	0.672773	0.476674	0.0383087		2.32905	0.594934	0.435132	0.0340171		1.88009	0.437491	0.346435	0.0252753		0.06	1.71428	0.70377	0.12		0.3	0.310596	0.0941579	0.008		67.2628	26.8888	4.07634	1.7721	0.0486762	0.340894
1.2	1350.43	11.6	59.572	23.769	3.52725	1.56515	88.4334		3.57087	1.09781	0.684912	0.0615727		2.88254	0.807283	0.545299	0.0457497		2.53498	0.671314	0.475592	0.0382814		2.32688	0.593643	0.434145	0.0339929		1.87834	0.436542	0.345648	0.0252574		0.06	1.71288	0.703794	0.12		0.3	0.310493	0.0940241	0.008		67.3637	26.8778	3.9886	1.76986	0.0483547	0.339383
1.2	1350.87	11.7	59.5942	23.7325	3.44559	1.5614	88.3337		3.56756	1.09543	0.683358	0.061529		2.87986	0.805532	0.544062	0.0457172		2.53263	0.669858	0.474513	0.0382543		2.32472	0.592356	0.43316	0.0339688		1.8766	0.435595	0.344864	0.0252394		0.06	1.71148	0.703817	0.12		0.3	0.31039	0.0938907	0.008		67.4648	26.8669	3.90065	1.76761	0.0480328	0.337871
1.2	1351.3	11.8	59.6164	23.696	3.36393	1.55765	88.234		3.56425	1.09305	0.681809	0.0614853		2.87719	0.803787	0.542829	0.0456848		2.53028	0.668407	0.473438	0.0382271		2.32256	0.591073	0.432178	0.0339447		1.87486	0.434651	0.344083	0.0252215		0.06	1.71008	0.70384	0.12		0.3	0.310288	0.0937574	0.008		67.5662	26.8559	3.81251	1.76536	0.0477106	0.336359
1.2	1351.74	11.9	59.6386	23.6596	3.28227	1.5539	88.1343		3.56094	1.09068	0.680264	0.0614417		2.87452	0.802046	0.541599	0.0456524		2.52793	0.666959	0.472365	0.0382		2.32041	0.589792	0.431199	0.0339206		1.87312	0.43371	0.343303	0.0252036		0.06	1.70869	0.703864	0.12		0.3	0.310185	0.0936245	0.008		67.6678	26.8449	3.72417	1.76311	0.047388	0.334845
1.2	1352.17	12	59.6607	23.6231	3.20061	1.55015	88.0346		3.55764	1.08832	0.678723	0.0613981		2.87185	0.800309	0.540372	0.04562		2.52558	0.665515	0.471295	0.0381729		2.31826	0.588515	0.430222	0.0338965		1.87138	0.432771	0.342525	0.0251858		0.06	1.7073	0.703887	0.12		0.3	0.310083	0.0934918	0.008		67.7696	26.8339	3.63563	1.76084	0.047065	0.333331
1.2	1352.61	12.1	59.6829	23.5866	3.11895	1.5464	87.9349		3.55434	1.08597	0.677187	0.0613546		2.86919	0.798578	0.539149	0.0455877		2.52324	0.664075	0.470228	0.0381459		2.31611	0.587242	0.429248	0.0338725		1.86965	0.431834	0.34175	0.0251679		0.06	1.70591	0.703911	0.12		0.3	0.30998	0.0933593	0.008		67.8717	26.8228	3.54688	1.75858	0.0467417	0.331816
1.2	1353.04	12.2	59.7051	23.5502	3.03728	1.54265	87.8352		3.55105	1.08362	0.675655	0.0613112		2.86653	0.796851	0.537929	0.0455554		2.52091	0.662639	0.469165	0.0381188		2.31397	0.585972	0.428277	0.0338485		1.86791	0.430901	0.340977	0.0251501		0.06	1.70452	0.703934	0.12		0.3	0.309878	0.0932272	0.008		67.974	26.8118	3.45794	1.75631	0.0464181	0.330301
1.2	1353.48	12.3	59.7272	23.5137	2.95562	1.53891	87.7355		3.54776	1.08128	0.674128	0.0612678		2.86388	0.795129	0.536713	0.0455231		2.51857	0.661207	0.468104	0.0380919		2.31182	0.584706	0.427309	0.0338246		1.86618	0.429969	0.340206	0.0251323		0.06	1.70313	0.703957	0.12		0.3	0.309776	0.0930952	0.008		68.0765	26.8007	3.36879	1.75403	0.046094	0.328784
1.2	1353.91	12.4	59.7494	23.4772	2.87396	1.53516	87.6357		3.54448	1.07894	0.672604	0.0612244		2.86123	0.793411	0.5355	0.0454909		2.51624	0.659779	0.467046	0.0380649		2.30968	0.583443	0.426343	0.0338006		1.86446	0.42904	0.339437	0.0251145		0.06	1.70175	0.703981	0.12		0.3	0.309673	0.0929636	0.008		68.1793	26.7895	3.27944	1.75175	0.0457696	0.327267
1.2	1354.35	12.5	59.7716	23.4407	2.7923	1.53141	87.536		3.5412	1.07661	0.671085	0.0611811		2.85858	0.791698	0.534291	0.0454588		2.51392	0.658354	0.465991	0.038038		2.30755	0.582183	0.42538	0.0337767		1.86273	0.428114	0.338671	0.0250968		0.06	1.70036	0.704004	0.12		0.3	0.309571	0.0928322	0.008		68.2823	26.7784	3.18989	1.74946	0.0454449	0.325749
1.2	1354.78	12.6	59.7938	23.4043	2.71064	1.52766	87.4363		3.53793	1.07429	0.66957	0.0611379		2.85594	0.789989	0.533084	0.0454266		2.51159	0.656933	0.464939	0.0380111		2.30542	0.580927	0.42442	0.0337529		1.86101	0.42719	0.337906	0.025079		0.06	1.69898	0.704027	0.12		0.3	0.309469	0.092701	0.008		68.3855	26.7672	3.10013	1.74717	0.0451198	0.32423
1.2	1355.22	12.7	59.8159	23.3678	2.62898	1.52391	87.3366		3.53466	1.07197	0.668059	0.0610947		2.8533	0.788286	0.531882	0.0453945		2.50927	0.655517	0.46389	0.0379843		2.30329	0.579674	0.423463	0.033729		1.85929	0.426269	0.337144	0.0250613		0.06	1.6976	0.70405	0.12		0.3	0.309367	0.0925701	0.008		68.489	26.756	3.01017	1.74487	0.0447943	0.32271
1.2	1355.65	12.8	59.8381	23.3313	2.54732	1.52016	87.2369		3.5314	1.06966	0.666553	0.0610516		2.85067	0.786586	0.530682	0.0453625		2.50696	0.654103	0.462844	0.0379574		2.30116	0.578424	0.422508	0.0337052		1.85758	0.42535	0.336383	0.0250436		0.06	1.69623	0.704074	0.12		0.3	0.309266	0.0924395	0.008		68.5927	26.7448	2.92	1.74257	0.0444684	0.321189
1.2	1356.09	12.9	59.8603	23.2948	2.46565	1.51641	87.1372		3.52814	1.06736	0.665051	0.0610085		2.84804	0.784892	0.529486	0.0453305		2.50464	0.652694	0.461801	0.0379307		2.29904	0.577178	0.421555	0.0336814		1.85586	0.424434	0.335625	0.0250259		0.06	1.69485	0.704097	0.12		0.3	0.309164	0.0923091	0.008		68.6966	26.7335	2.82962	1.74026	0.0441421	0.319668
1.2	1356.52	13	59.8825	23.2584	2.38399	1.51266	87.0375		3.52489	1.06506	0.663552	0.0609655		2.84541	0.783202	0.528293	0.0452985		2.50233	0.651289	0.460761	0.0379039		2.29692	0.575935	0.420606	0.0336577		1.85415	0.42352	0.334869	0.0250083		0.06	1.69348	0.70412	0.12		0.3	0.309062	0.092179	0.008		68.8008	26.7222	2.73904	1.73795	0.0438155	0.318145
1.2	1356.96	13.1	59.9046	23.2219	2.30233	1.50892	86.9378		3.52164	1.06277	0.662059	0.0609225		2.84279	0.781516	0.527104	0.0452666		2.50003	0.649887	0.459723	0.0378772		2.2948	0.574696	0.419659	0.0336339		1.85244	0.422608	0.334115	0.0249907		0.06	1.69211	0.704144	0.12		0.3	0.308961	0.0920491	0.008		68.9052	26.7109	2.64825	1.73563	0.0434885	0.316622
1.2	1357.39	13.2	59.9268	23.1854	2.22067	1.50517	86.838		3.51839	1.06048	0.660569	0.0608796		2.84017	0.779835	0.525918	0.0452347		2.49772	0.648489	0.458689	0.0378505		2.29269	0.57346	0.418715	0.0336102		1.85074	0.421699	0.333363	0.0249731		0.06	1.69074	0.704167	0.12		0.3	0.308859	0.0919194	0.008		69.0098	26.6996	2.55725	1.7333	0.0431611	0.315098
1.2	1357.83	13.3	59.949	23.1489	2.13901	1.50142	86.7383		3.51515	1.0582	0.659083	0.0608367		2.83756	0.778159	0.524735	0.0452028		2.49542	0.647095	0.457657	0.0378239		2.29057	0.572227	0.417773	0.0335866		1.84903	0.420793	0.332614	0.0249555		0.06	1.68937	0.70419	0.12		0.3	0.308758	0.0917901	0.008		69.1147	26.6882	2.46605	1.73097	0.0428334	0.313573
1.2	1358.26	13.4	59.9711	23.1125	2.05735	1.49767	86.6386		3.51192	1.05593	0.657602	0.0607939		2.83494	0.776487	0.523556	0.045171		2.49313	0.645705	0.456628	0.0377972		2.28847	0.570997	0.416834	0.0335629		1.84733	0.419888	0.331866	0.0249379		0.06	1.688	0.704213	0.12		0.3	0.308657	0.0916609	0.008		69.2199	26.6769	2.37463	1.72864	0.0425052	0.312047
1.2	1358.7	13.5	59.9933	23.076	1.97568	1.49392	86.5389		3.50869	1.05366	0.656124	0.0607512		2.83234	0.774819	0.522379	0.0451393		2.49083	0.644318	0.455602	0.0377707		2.28636	0.569771	0.415897	0.0335393		1.84563	0.418987	0.331121	0.0249204		0.06	1.68664	0.704236	0.12		0.3	0.308555	0.0915321	0.008		69.3253	26.6654	2.283	1.7263	0.0421767	0.31052
1.2	1359.13	13.6	60.0155	23.0395	1.89402	1.49017	86.4392		3.50546	1.0514	0.654651	0.0607084		2.82973	0.773156	0.521206	0.0451075		2.48855	0.642935	0.454579	0.0377441		2.28426	0.568548	0.414963	0.0335158		1.84393	0.418087	0.330377	0.0249029		0.06	1.68528	0.70426	0.12		0.3	0.308454	0.0914034	0.008		69.4309	26.654	2.19116	1.72395	0.0418477	0.308992
1.2	1359.57	13.7	60.0377	23.003	1.81236	1.48642	86.3395		3.50224	1.04914	0.653182	0.0606658		2.82713	0.771497	0.520037	0.0450758		2.48626	0.641556	0.453559	0.0377176		2.28216	0.567328	0.414032	0.0334922		1.84224	0.41719	0.329636	0.0248854		0.06	1.68392	0.704283	0.12		0.3	0.308353	0.091275	0.008		69.5367	26.6425	2.09911	1.7216	0.0415184	0.307463
1.2	1360	13.8	60.0598	22.9666	1.7307	1.48267	86.2398		3.49903	1.04689	0.651717	0.0606232		2.82454	0.769843	0.51887	0.0450442		2.48398	0.64018	0.452542	0.0376911		2.28007	0.566112	0.413103	0.0334687		1.84055	0.416296	0.328896	0.0248679		0.06	1.68256	0.704306	0.12		0.3	0.308252	0.0911469	0.008		69.6428	26.6311	2.00685	1.71925	0.0411887	0.305933
1.2	1360.43	13.9	60.082	22.9301	1.64904	1.47893	86.1401		3.49582	1.04465	0.650256	0.0605806		2.82194	0.768193	0.517707	0.0450126		2.4817	0.638808	0.451527	0.0376646		2.27797	0.564899	0.412177	0.0334452		1.83886	0.415404	0.328159	0.0248504		0.06	1.6812	0.704329	0.12		0.3	0.308152	0.091019	0.008		69.7492	26.6195	1.91437	1.71689	0.0408586	0.304403
1.2	1360.87	14	60.1042	22.8936	1.56738	1.47518	86.0404		3.49261	1.04241	0.648799	0.0605381		2.81936	0.766548	0.516547	0.044981		2.47942	0.63744	0.450516	0.0376382		2.27588	0.563689	0.411254	0.0334217		1.83717	0.414514	0.327424	0.024833		0.06	1.67985	0.704352	0.12		0.3	0.308051	0.0908914	0.008		69.8558	26.608	1.82168	1.71452	0.0405281	0.302871
1.2	1361.3	14.1	60.1264	22.8571	1.48571	1.47143	85.9406		3.48941	1.04018	0.647346	0.0604957		2.81677	0.764907	0.51539	0.0449495		2.47715	0.636075	0.449507	0.0376118		2.2738	0.562482	0.410333	0.0333983		1.83549	0.413627	0.32669	0.0248156		0.06	1.67849	0.704375	0.12		0.3	0.30795	0.090764	0.008		69.9627	26.5964	1.72877	1.71215	0.0401972	0.301338
1.2	1361.74	14.2	60.1485	22.8207	1.40405	1.46768	85.8409		3.48621	1.03795	0.645897	0.0604533		2.81419	0.76327	0.514237	0.044918		2.47488	0.634714	0.448501	0.0375855		2.27171	0.561278	0.409414	0.0333749		1.83381	0.412742	0.325959	0.0247982		0.06	1.67714	0.704398	0.12		0.3	0.30785	0.0906369	0.008		70.0698	26.5848	1.63564	1.70977	0.0398659	0.299805
1.2	1362.17	14.3	60.1707	22.7842	1.32239	1.46393	85.7412		3.48302	1.03574	0.644452	0.060411		2.81161	0.761638	0.513086	0.0448865		2.47261	0.633357	0.447497	0.0375592		2.26963	0.560078	0.408498	0.0333515		1.83213	0.411859	0.32523	0.0247808		0.06	1.67579	0.704422	0.12		0.3	0.307749	0.09051	0.008		70.1771	26.5732	1.5423	1.70738	0.0395342	0.29827
1.2	1362.61	14.4	60.1929	22.7477	1.24073	1.46018	85.6415		3.47983	1.03352	0.643011	0.0603687		2.80904	0.76001	0.511939	0.0448551		2.47035	0.632003	0.446497	0.0375329		2.26755	0.558881	0.407585	0.0333282		1.83045	0.410979	0.324503	0.0247635		0.06	1.67444	0.704445	0.12		0.3	0.307649	0.0903833	0.008		70.2847	26.5616	1.44875	1.70499	0.039202	0.296735
1.2	1363.04	14.5	60.215	22.7112	1.15907	1.45643	85.5418		3.47664	1.03131	0.641574	0.0603265		2.80647	0.758387	0.510795	0.0448237		2.46809	0.630653	0.445499	0.0375066		2.26548	0.557687	0.406674	0.0333049		1.82877	0.410101	0.323778	0.0247462		0.06	1.6731	0.704468	0.12		0.3	0.307548	0.0902569	0.008		70.3925	26.5499	1.35497	1.7026	0.0388695	0.295198
1.2	1363.48	14.6	60.2372	22.6748	1.07741	1.45268	85.4421		3.47347	1.02911	0.640141	0.0602843		2.8039	0.756768	0.509654	0.0447924		2.46583	0.629307	0.444504	0.0374804		2.26341	0.556497	0.405766	0.0332816		1.8271	0.409225	0.323054	0.0247289		0.06	1.67175	0.704491	0.12		0.3	0.307448	0.0901307	0.008		70.5006	26.5382	1.26098	1.7002	0.0385366	0.29366
1.2	1363.91	14.7	60.2594	22.6383	0.995745	1.44894	85.3424		3.47029	1.02692	0.638712	0.0602421		2.80134	0.755153	0.508516	0.0447611		2.46358	0.627964	0.443512	0.0374542		2.26134	0.555309	0.40486	0.0332583		1.82543	0.408352	0.322333	0.0247116		0.06	1.67041	0.704514	0.12		0.3	0.307348	0.0900048	0.008		70.609	26.5264	1.16676	1.69779	0.0382032	0.292122
1.2	1364.35	14.8	60.2816	22.6018	0.914083	1.44519	85.2427		3.46712	1.02473	0.637287	0.0602001		2.79878	0.753542	0.507382	0.0447298		2.46133	0.626625	0.442522	0.037428		2.25927	0.554125	0.403957	0.0332351		1.82377	0.407481	0.321614	0.0246943		0.06	1.66907	0.704537	0.12		0.3	0.307248	0.0898791	0.008		70.7176	26.5147	1.07233	1.69538	0.0378694	0.290582
1.2	1364.78	14.9	60.3037	22.5653	0.832421	1.44144	85.1429		3.46396	1.02254	0.635866	0.060158		2.79623	0.751936	0.50625	0.0446986		2.45908	0.625289	0.441535	0.0374019		2.25721	0.552944	0.403056	0.0332119		1.8221	0.406613	0.320897	0.0246771		0.06	1.66773	0.70456	0.12		0.3	0.307148	0.0897537	0.008		70.8265	26.5029	0.977675	1.69296	0.0375352	0.289041
1.2	1365.22	15	60.3259	22.5289	0.75076	1.43769	85.0432		3.46079	1.02036	0.634448	0.0601161		2.79367	0.750334	0.505122	0.0446674		2.45683	0.623957	0.440551	0.0373758		2.25515	0.551765	0.402158	0.0331887		1.82044	0.405746	0.320182	0.0246599		0.06	1.66639	0.704583	0.12		0.3	0.307048	0.0896285	0.008		70.9356	26.4911	0.882798	1.69054	0.0372006	0.2875
1.2	1365.65	15.1	60.3481	22.4924	0.669098	1.43394	84.9435		3.45764	1.01819	0.633035	0.0600741		2.79113	0.748736	0.503997	0.0446362		2.45459	0.622628	0.43957	0.0373497		2.2531	0.550591	0.401262	0.0331656		1.81878	0.404882	0.319468	0.0246427		0.06	1.66506	0.704606	0.12		0.3	0.306948	0.0895036	0.008		71.0449	26.4792	0.787698	1.68811	0.0368656	0.285957
1.2	1366.09	15.2	60.3703	22.4559	0.587437	1.43019	84.8438		3.45449	1.01602	0.631626	0.0600323		2.78858	0.747143	0.502875	0.0446051		2.45236	0.621303	0.438591	0.0373237		2.25104	0.549419	0.400368	0.0331425		1.81712	0.404021	0.318757	0.0246255		0.06	1.66373	0.704629	0.12		0.3	0.306848	0.0893789	0.008		71.1546	26.4674	0.692374	1.68568	0.0365302	0.284413
1.2	1366.52	15.3	60.3924	22.4195	0.505775	1.42644	84.7441		3.45134	1.01386	0.63022	0.0599904		2.78604	0.745553	0.501756	0.044574		2.45012	0.619981	0.437615	0.0372977		2.24899	0.54825	0.399478	0.0331194		1.81546	0.403161	0.318048	0.0246083		0.06	1.66239	0.704652	0.12		0.3	0.306749	0.0892544	0.008		71.2645	26.4555	0.596826	1.68324	0.0361943	0.282868
1.2	1366.96	15.4	60.4146	22.383	0.424113	1.4227	84.6444		3.4482	1.01171	0.628819	0.0599487		2.78351	0.743968	0.50064	0.044543		2.44789	0.618663	0.436642	0.0372717		2.24694	0.547084	0.398589	0.0330963		1.81381	0.402304	0.31734	0.0245912		0.06	1.66106	0.704675	0.12		0.3	0.306649	0.0891301	0.008		71.3746	26.4435	0.501053	1.68079	0.035858	0.281322
1.2	1367.39	15.5	60.4368	22.3465	0.342452	1.41895	84.5447		3.44506	1.00956	0.627421	0.059907		2.78097	0.742387	0.499527	0.044512		2.44566	0.617349	0.435671	0.0372458		2.2449	0.545922	0.397703	0.0330733		1.81216	0.401449	0.316635	0.0245741		0.06	1.65974	0.704698	0.12		0.3	0.30655	0.0890061	0.008		71.485	26.4316	0.405054	1.67834	0.0355213	0.279775
1.2	1367.83	15.6	60.4589	22.31	0.26079	1.4152	84.445		3.44193	1.00741	0.626027	0.0598653		2.77844	0.740811	0.498417	0.0444811		2.44344	0.616038	0.434703	0.0372199		2.24286	0.544763	0.396819	0.0330503		1.81051	0.400597	0.315932	0.024557		0.06	1.65841	0.704721	0.12		0.3	0.30645	0.0888824	0.008		71.5957	26.4196	0.308829	1.67588	0.0351841	0.278226
1.2	1368.26	15.7	60.4811	22.2736	0.179129	1.41145	84.3453		3.4388	1.00527	0.624637	0.0598237		2.77592	0.739238	0.49731	0.0444501		2.44122	0.61473	0.433738	0.037194		2.24082	0.543606	0.395938	0.0330273		1.80887	0.399746	0.31523	0.0245399		0.06	1.65708	0.704744	0.12		0.3	0.306351	0.0887589	0.008		71.7066	26.4076	0.212376	1.67342	0.0348465	0.276677
1.2	1368.7	15.8	60.5033	22.2371	0.0974671	1.4077	84.2455		3.43567	1.00314	0.62325	0.0597821		2.7734	0.73767	0.496207	0.0444192		2.439	0.613426	0.432775	0.0371682		2.23878	0.542453	0.39506	0.0330044		1.80722	0.398898	0.31453	0.0245229		0.06	1.65576	0.704767	0.12		0.3	0.306252	0.0886356	0.008		71.8178	26.3956	0.115694	1.67095	0.0345084	0.275127
1.2	1369.13	15.9	60.5255	22.2006	0.0158055	1.40395	84.1458		3.43255	1.00101	0.621868	0.0597406		2.77088	0.736106	0.495106	0.0443884		2.43678	0.612125	0.431815	0.0371424		2.23675	0.541303	0.394183	0.0329814		1.80558	0.398052	0.313833	0.0245058		0.06	1.65444	0.70479	0.12		0.3	0.306153	0.0885125	0.008		71.9293	26.3835	0.0187834	1.66847	0.03417	0.273575
1.2	1369.57	16	60.5476	22.1641	0	1.4002	84.112		3.42944	0.998893	0.620489	0.0596991		2.76836	0.734546	0.494008	0.0443576		2.43457	0.610828	0.430858	0.0371166		2.23472	0.540156	0.393309	0.0329585		1.80394	0.397209	0.313137	0.0244888		0.06	1.65312	0.704813	0.12		0.3	0.306054	0.0883897	0.008		71.9846	26.3507	0	1.66469	0.0340442	0.273104
1.2	1370	16.1	60.5549	22.0568	0	1.4002	84.012		3.42633	0.996777	0.619114	0.0596577		2.76585	0.73299	0.492914	0.0443268		2.43236	0.609534	0.429903	0.0370908		2.23269	0.539011	0.392438	0.0329357		1.80231	0.396367	0.312443	0.0244718		0.06	1.6518	0.704835	0.12		0.3	0.305955	0.0882672	0.008		72.0789	26.2544	0	1.66667	0.0339403	0.272545
1.2	1370.43	16.2	60.5622	21.9495	0	1.4002	83.912		3.42322	0.994667	0.617743	0.0596163		2.76334	0.731438	0.491822	0.0442961		2.43016	0.608244	0.428951	0.0370651		2.23067	0.53787	0.391569	0.0329128		1.80067	0.395528	0.311751	0.0244549		0.06	1.65049	0.704858	0.12		0.3	0.305856	0.0881448	0.008		72.1735	26.1578	0	1.66866	0.0338366	0.271985
1.2	1370.87	16.3	60.5695	21.8422	0	1.4002	83.812		3.42012	0.992562	0.616376	0.059575		2.76084	0.72989	0.490733	0.0442654		2.42796	0.606957	0.428002	0.0370394		2.22865	0.536732	0.390702	0.03289		1.79904	0.394691	0.311061	0.0244379		0.06	1.64917	0.704881	0.12		0.3	0.305757	0.0880227	0.008		72.2684	26.061	0	1.67065	0.033733	0.271423
1.2	1371.3	16.4	60.5768	21.7349	0	1.4002	83.712		3.41702	0.990463	0.615012	0.0595338		2.75834	0.728347	0.489648	0.0442347		2.42576	0.605673	0.427055	0.0370138		2.22663	0.535597	0.389838	0.0328673		1.79741	0.393857	0.310373	0.024421		0.06	1.64786	0.704904	0.12		0.3	0.305658	0.0879008	0.008		72.3634	25.9639	0	1.67264	0.0336295	0.270861
1.2	1371.74	16.5	60.5841	21.6276	0	1.4002	83.612		3.41393	0.98837	0.613652	0.0594926		2.75584	0.726807	0.488565	0.0442041		2.42356	0.604393	0.426111	0.0369882		2.22461	0.534465	0.388976	0.0328445		1.79578	0.393024	0.309687	0.0244041		0.06	1.64655	0.704927	0.12		0.3	0.30556	0.0877792	0.008		72.4587	25.8667	0	1.67464	0.0335262	0.270296
1.2	1372.17	16.6	60.5914	21.5203	0	1.4002	83.512		3.41084	0.986282	0.612296	0.0594514		2.75335	0.725272	0.487485	0.0441735		2.42137	0.603116	0.425169	0.0369626		2.2226	0.533336	0.388116	0.0328218		1.79416	0.392194	0.309002	0.0243872		0.06	1.64524	0.70495	0.12		0.3	0.305461	0.0876578	0.008		72.5542	25.7691	0	1.67665	0.0334229	0.269731
1.2	1372.61	16.7	60.5988	21.413	0	1.4002	83.412		3.40775	0.984199	0.610944	0.0594103		2.75086	0.723741	0.486408	0.044143		2.41918	0.601843	0.42423	0.036937		2.22059	0.53221	0.387259	0.0327991		1.79254	0.391366	0.30832	0.0243703		0.06	1.64393	0.704973	0.12		0.3	0.305363	0.0875366	0.008		72.6499	25.6714	0	1.67866	0.0333198	0.269163
1.2	1373.04	16.8	60.6061	21.3057	0	1.4002	83.312		3.40467	0.982122	0.609595	0.0593692		2.74837	0.722213	0.485335	0.0441125		2.41699	0.600573	0.423293	0.0369115		2.21858	0.531087	0.386404	0.0327764		1.79092	0.39054	0.307639	0.0243535		0.06	1.64263	0.704995	0.12		0.3	0.305264	0.0874157	0.008		72.7459	25.5734	0	1.68067	0.0332169	0.268595
1.2	1373.48	16.9	60.6134	21.1984	0	1.4002	83.212		3.4016	0.980051	0.60825	0.0593282		2.74589	0.72069	0.484264	0.044082		2.41481	0.599306	0.422359	0.036886		2.21658	0.529967	0.385551	0.0327538		1.7893	0.389716	0.30696	0.0243367		0.06	1.64132	0.705018	0.12		0.3	0.305166	0.087295	0.008		72.8421	25.4752	0	1.68269	0.033114	0.268025
1.2	1373.91	17	60.6207	21.0911	0	1.4002	83.112		3.39853	0.977985	0.606908	0.0592873		2.74341	0.719171	0.483196	0.0440516		2.41263	0.598042	0.421428	0.0368605		2.21458	0.528849	0.384701	0.0327312		1.78768	0.388895	0.306283	0.0243199		0.06	1.64002	0.705041	0.12		0.3	0.305068	0.0871745	0.008		72.9385	25.3767	0	1.68472	0.0330113	0.267454
1.2	1374.35	17.1	60.628	20.9838	0	1.4002	83.012		3.39546	0.975924	0.605571	0.0592463		2.74093	0.717655	0.482131	0.0440212		2.41045	0.596782	0.420499	0.0368351		2.21258	0.527735	0.383853	0.0327086		1.78607	0.388075	0.305608	0.0243031		0.06	1.63872	0.705064	0.12		0.3	0.30497	0.0870542	0.008		73.0352	25.2781	0	1.68675	0.0329087	0.266881
1.2	1374.78	17.2	60.6353	20.8765	0	1.4002	82.912		3.3924	0.973869	0.604237	0.0592055		2.73846	0.716144	0.481069	0.0439908		2.40828	0.595526	0.419572	0.0368097		2.21058	0.526624	0.383007	0.032686		1.78446	0.387258	0.304935	0.0242863		0.06	1.63742	0.705087	0.12		0.3	0.304872	0.0869342	0.008		73.1321	25.1791	0	1.68878	0.0328062	0.266306
1.2	1375.22	17.3	60.6426	20.7692	0	1.4002	82.812		3.38934	0.971819	0.602906	0.0591647		2.73599	0.714637	0.480009	0.0439605		2.40611	0.594272	0.418649	0.0367843		2.20859	0.525515	0.382164	0.0326635		1.78285	0.386443	0.304263	0.0242696		0.06	1.63613	0.705109	0.12		0.3	0.304774	0.0868144	0.008		73.2292	25.08	0	1.69082	0.0327038	0.265731
1.2	1375.65	17.4	60.6499	20.6619	0	1.4002	82.712		3.38629	0.969775	0.601579	0.0591239		2.73353	0.713133	0.478953	0.0439302		2.40394	0.593022	0.417727	0.036759		2.2066	0.52441	0.381323	0.032641		1.78124	0.38563	0.303594	0.0242529		0.06	1.63483	0.705132	0.12		0.3	0.304676	0.0866948	0.008		73.3266	24.9806	0	1.69287	0.0326016	0.265154
1.2	1376.09	17.5	60.6572	20.5546	0	1.4002	82.612		3.38324	0.967736	0.600256	0.0590832		2.73107	0.711634	0.477899	0.0439		2.40177	0.591775	0.416809	0.0367336		2.20461	0.523307	0.380484	0.0326185		1.77964	0.384819	0.302926	0.0242362		0.06	1.63354	0.705155	0.12		0.3	0.304578	0.0865755	0.008		73.4242	24.8809	0	1.69491	0.0324994	0.264575
1.2	1376.52	17.6	60.6645	20.4473	0	1.4002	82.512		3.38019	0.965702	0.598936	0.0590425		2.72861	0.710139	0.476849	0.0438697		2.39961	0.590532	0.415892	0.0367084		2.20263	0.522208	0.379648	0.0325961		1.77804	0.384011	0.30226	0.0242195		0.06	1.63225	0.705178	0.12		0.3	0.30448	0.0864564	0.008		73.522	24.781	0	1.69697	0.0323974	0.263995
1.2	1376.96	17.7	60.6718	20.34	0	1.4002	82.412		3.37715	0.963674	0.59762	0.0590019		2.72615	0.708647	0.475801	0.0438396		2.39745	0.589291	0.414978	0.0366831		2.20065	0.521111	0.378814	0.0325736		1.77644	0.383204	0.301596	0.0242028		0.06	1.63095	0.7052	0.12		0.3	0.304383	0.0863375	0.008		73.6201	24.6809	0	1.69903	0.0322955	0.263413
1.2	1377.39	17.8	60.6791	20.2327	0	1.4002	82.312		3.37411	0.961651	0.596308	0.0589614		2.7237	0.707159	0.474756	0.0438094		2.3953	0.588054	0.414067	0.0366579		2.19867	0.520017	0.377982	0.0325512		1.77484	0.3824	0.300934	0.0241862		0.06	1.62967	0.705223	0.12		0.3	0.304285	0.0862188	0.008		73.7184	24.5805	0	1.70109	0.0321938	0.26283
1.2	1377.83	17.9	60.6864	20.1254	0	1.4002	82.212		3.37108	0.959633	0.594999	0.0589208		2.72126	0.705676	0.473714	0.0437793		2.39315	0.58682	0.413158	0.0366327		2.19669	0.518926	0.377152	0.0325289		1.77325	0.381597	0.300273	0.0241696		0.06	1.62838	0.705246	0.12		0.3	0.304188	0.0861004	0.008		73.8169	24.4799	0	1.70316	0.0320921	0.262246
1.2	1378.26	18	60.6937	20.0181	0	1.4002	82.112		3.36805	0.957621	0.593694	0.0588804		2.71881	0.704196	0.472675	0.0437493		2.391	0.58559	0.412252	0.0366075		2.19472	0.517838	0.376325	0.0325065		1.77165	0.380797	0.299614	0.024153		0.06	1.62709	0.705268	0.12		0.3	0.30409	0.0859822	0.008		73.9157	24.379	0	1.70524	0.0319906	0.26166
1.2	1378.7	18.1	60.701	19.9108	0	1.4002	82.012		3.36503	0.955614	0.592392	0.05884		2.71637	0.70272	0.471639	0.0437192		2.38885	0.584362	0.411348	0.0365824		2.19275	0.516752	0.375499	0.0324842		1.77006	0.379999	0.298957	0.0241364		0.06	1.62581	0.705291	0.12		0.3	0.303993	0.0858642	0.008		74.0148	24.2779	0	1.70731	0.0318892	0.261072
1.2	1379.13	18.2	60.7083	19.8035	0	1.4002	81.912		3.36201	0.953612	0.591094	0.0587996		2.71393	0.701248	0.470605	0.0436892		2.38671	0.583138	0.410447	0.0365573		2.19078	0.51567	0.374677	0.0324619		1.76848	0.379203	0.298302	0.0241198		0.06	1.62453	0.705314	0.12		0.3	0.303896	0.0857464	0.008		74.114	24.1766	0	1.7094	0.0317879	0.260483
1.2	1379.57	18.3	60.7156	19.6962	0	1.4002	81.812		3.359	0.951615	0.589799	0.0587593		2.7115	0.69978	0.469574	0.0436593		2.38457	0.581917	0.409548	0.0365323		2.18882	0.51459	0.373856	0.0324397		1.76689	0.378409	0.297649	0.0241033		0.06	1.62325	0.705336	0.12		0.3	0.303798	0.0856289	0.008		74.2136	24.075	0	1.71149	0.0316867	0.259893
1.2	1380	18.4	60.7229	19.5889	0	1.4002	81.712		3.35599	0.949624	0.588508	0.058719		2.70907	0.698315	0.468546	0.0436293		2.38243	0.5807	0.408651	0.0365072		2.18686	0.513513	0.373038	0.0324174		1.76531	0.377617	0.296997	0.0240868		0.06	1.62197	0.705359	0.12		0.3	0.303701	0.0855116	0.008		74.3133	23.9731	0	1.71358	0.0315856	0.259301
1.2	1380.43	18.5	60.7302	19.4816	0	1.4002	81.612		3.35298	0.947638	0.587221	0.0586788		2.70664	0.696855	0.467521	0.0435995		2.3803	0.579485	0.407757	0.0364822		2.1849	0.512439	0.372221	0.0323952		1.76373	0.376827	0.296347	0.0240703		0.06	1.62069	0.705382	0.12		0.3	0.303604	0.0853945	0.008		74.4133	23.871	0	1.71568	0.0314846	0.258707
1.2	1380.87	18.6	60.7375	19.3743	0	1.4002	81.512		3.34998	0.945657	0.585936	0.0586386		2.70422	0.695398	0.466499	0.0435696		2.37817	0.578274	0.406865	0.0364572		2.18294	0.511368	0.371407	0.0323731		1.76215	0.376039	0.295699	0.0240538		0.06	1.61942	0.705404	0.12		0.3	0.303508	0.0852776	0.008		74.5136	23.7686	0	1.71779	0.0313838	0.258112
1.2	1381.3	18.7	60.7448	19.267	0	1.4002	81.412		3.34698	0.943681	0.584656	0.0585985		2.7018	0.693945	0.465479	0.0435398		2.37604	0.577066	0.405976	0.0364323		2.18099	0.510299	0.370596	0.0323509		1.76057	0.375254	0.295053	0.0240373		0.06	1.61815	0.705427	0.12		0.3	0.303411	0.085161	0.008		74.6141	23.666	0	1.7199	0.031283	0.257515
1.2	1381.74	18.8	60.7521	19.1597	0	1.4002	81.312		3.34399	0.94171	0.583378	0.0585584		2.69938	0.692496	0.464462	0.04351		2.37391	0.57586	0.405089	0.0364074		2.17904	0.509234	0.369786	0.0323288		1.759	0.37447	0.294409	0.0240209		0.06	1.61688	0.70545	0.12		0.3	0.303314	0.0850445	0.008		74.7148	23.5632	0	1.72201	0.0311824	0.256917
1.2	1382.17	18.9	60.7594	19.0524	0	1.4002	81.212		3.341	0.939745	0.582105	0.0585184		2.69697	0.691051	0.463448	0.0434803		2.37179	0.574659	0.404204	0.0363825		2.17709	0.508171	0.368979	0.0323067		1.75742	0.373689	0.293766	0.0240045		0.06	1.61561	0.705472	0.12		0.3	0.303217	0.0849283	0.008		74.8158	23.4601	0	1.72413	0.0310819	0.256318
1.2	1382.61	19	60.7667	18.9451	0	1.4002	81.112		3.33801	0.937784	0.580834	0.0584784		2.69456	0.689609	0.462437	0.0434506		2.36967	0.57346	0.403322	0.0363576		2.17515	0.507111	0.368173	0.0322846		1.75585	0.372909	0.293125	0.0239881		0.06	1.61434	0.705495	0.12		0.3	0.303121	0.0848123	0.008		74.917	23.3567	0	1.72626	0.0309815	0.255717
1.2	1383.04	19.1	60.774	18.8378	0	1.4002	81.012		3.33503	0.935829	0.579568	0.0584385		2.69216	0.688171	0.461428	0.0434209		2.36756	0.572264	0.402443	0.0363328		2.1732	0.506054	0.36737	0.0322626		1.75429	0.372132	0.292485	0.0239717		0.06	1.61307	0.705517	0.12		0.3	0.303024	0.0846966	0.008		75.0185	23.2531	0	1.72839	0.0308812	0.255114
1.2	1383.48	19.2	60.7813	18.7305	0	1.4002	80.912		3.33206	0.933879	0.578304	0.0583986		2.68975	0.686737	0.460422	0.0433913		2.36544	0.571072	0.401565	0.036308		2.17126	0.504999	0.366569	0.0322405		1.75272	0.371356	0.291848	0.0239553		0.06	1.61181	0.70554	0.12		0.3	0.302928	0.084581	0.008		75.1203	23.1492	0	1.73053	0.030781	0.25451
1.2	1383.91	19.3	60.7886	18.6232	0	1.4002	80.812		3.32909	0.931934	0.577044	0.0583588		2.68735	0.685307	0.459419	0.0433617		2.36333	0.569882	0.40069	0.0362832		2.16933	0.503947	0.365771	0.0322186		1.75116	0.370583	0.291212	0.023939		0.06	1.61054	0.705562	0.12		0.3	0.302832	0.0844657	0.008		75.2223	23.0451	0	1.73267	0.030681	0.253904
1.2	1384.35	19.4	60.7959	18.5159	0	1.4002	80.712		3.32612	0.929994	0.575787	0.058319		2.68496	0.68388	0.458419	0.0433321		2.36123	0.568696	0.399818	0.0362585		2.16739	0.502898	0.364974	0.0321966		1.7496	0.369811	0.290578	0.0239227		0.06	1.60928	0.705585	0.12		0.3	0.302735	0.0843506	0.008		75.3245	22.9407	0	1.73481	0.030581	0.253296
1.2	1384.78	19.5	60.8032	18.4086	0	1.4002	80.612		3.32315	0.928059	0.574534	0.0582792		2.68257	0.682458	0.457421	0.0433026		2.35912	0.567513	0.398948	0.0362338		2.16546	0.501852	0.36418	0.0321747		1.74804	0.369042	0.289945	0.0239064		0.06	1.60802	0.705607	0.12		0.3	0.302639	0.0842357	0.008		75.427	22.836	0	1.73697	0.0304811	0.252687
1.2	1385.22	19.6	60.8105	18.3013	0	1.4002	80.512		3.32019	0.926129	0.573284	0.0582396		2.68018	0.681038	0.456426	0.0432731		2.35702	0.566333	0.39808	0.0362091		2.16353	0.500808	0.363388	0.0321527		1.74648	0.368274	0.289314	0.0238901		0.06	1.60676	0.70563	0.12		0.3	0.302543	0.084121	0.008		75.5298	22.7311	0	1.73912	0.0303814	0.252077
1.2	1385.65	19.7	60.8178	18.194	0	1.4002	80.412		3.31724	0.924204	0.572038	0.0581999		2.67779	0.679623	0.455433	0.0432436		2.35492	0.565156	0.397214	0.0361845		2.16161	0.499767	0.362597	0.0321309		1.74492	0.367509	0.288685	0.0238738		0.06	1.60551	0.705652	0.12		0.3	0.302447	0.0840065	0.008		75.6328	22.626	0	1.74129	0.0302818	0.251465
1.2	1386.09	19.8	60.8251	18.0867	0	1.4002	80.312		3.31429	0.922284	0.570795	0.0581603		2.67541	0.678211	0.454444	0.0432142		2.35283	0.563982	0.396351	0.0361599		2.15968	0.498729	0.36181	0.032109		1.74337	0.366746	0.288058	0.0238576		0.06	1.60425	0.705675	0.12		0.3	0.302351	0.0838923	0.008		75.736	22.5205	0	1.74345	0.0301822	0.250851
1.2	1386.52	19.9	60.8324	17.9794	0	1.4002	80.212		3.31134	0.92037	0.569555	0.0581208		2.67303	0.676803	0.453457	0.0431848		2.35074	0.562811	0.39549	0.0361353		2.15776	0.497694	0.361024	0.0320872		1.74182	0.365984	0.287432	0.0238414		0.06	1.603	0.705697	0.12		0.3	0.302255	0.0837782	0.008		75.8395	22.4148	0	1.74563	0.0300828	0.250236
1.2	1386.96	20	60.8397	17.8721	0	1.4002	80.112		3.3084	0.91846	0.568319	0.0580813		2.67065	0.675399	0.452472	0.0431555		2.34865	0.561643	0.394632	0.0361107		2.15585	0.496661	0.36024	0.0320654		1.74027	0.365225	0.286808	0.0238252		0.06	1.60175	0.70572	0.12		0.3	0.30216	0.0836644	0.008		75.9433	22.3089	0	1.74781	0.0299835	0.249619
1.2	1387.39	20.1	60.847	17.7648	0	1.4002	80.012		3.30546	0.916555	0.567085	0.0580418		2.66828	0.673998	0.45149	0.0431262		2.34656	0.560478	0.393775	0.0360862		2.15393	0.495631	0.359458	0.0320436		1.73873	0.364467	0.286186	0.023809		0.06	1.60049	0.705742	0.12		0.3	0.302064	0.0835508	0.008		76.0474	22.2026	0	1.74999	0.0298842	0.249
1.2	1387.83	20.2	60.8543	17.6575	0	1.4002	79.912		3.30252	0.914655	0.565856	0.0580024		2.66591	0.672601	0.450511	0.0430969		2.34448	0.559316	0.392921	0.0360617		2.15202	0.494604	0.358679	0.0320218		1.73718	0.363712	0.285565	0.0237928		0.06	1.59925	0.705765	0.12		0.3	0.301968	0.0834374	0.008		76.1517	22.0961	0	1.75218	0.0297851	0.24838
1.2	1388.26	20.3	60.8616	17.5502	0	1.4002	79.812		3.29959	0.91276	0.564629	0.0579631		2.66355	0.671207	0.449535	0.0430677		2.3424	0.558157	0.39207	0.0360372		2.15011	0.493579	0.357901	0.0320001		1.73564	0.362958	0.284947	0.0237767		0.06	1.598	0.705787	0.12		0.3	0.301873	0.0833242	0.008		76.2562	21.9894	0	1.75438	0.0296861	0.247758
1.2	1388.7	20.4	60.8689	17.4429	0	1.4002	79.712		3.29667	0.91087	0.563406	0.0579237		2.66119	0.669817	0.448561	0.0430385		2.34032	0.557001	0.39122	0.0360128		2.1482	0.492557	0.357126	0.0319784		1.7341	0.362206	0.284329	0.0237606		0.06	1.59675	0.70581	0.12		0.3	0.301777	0.0832113	0.008		76.3611	21.8824	0	1.75658	0.0295872	0.247135
1.2	1389.13	20.5	60.8762	17.3356	0	1.4002	79.612		3.29375	0.908984	0.562186	0.0578845		2.65883	0.668431	0.44759	0.0430093		2.33824	0.555848	0.390373	0.0359884		2.1463	0.491537	0.356353	0.0319567		1.73257	0.361457	0.283714	0.0237445		0.06	1.59551	0.705832	0.12		0.3	0.301682	0.0830985	0.008		76.4661	21.7751	0	1.75878	0.0294884	0.24651
1.2	1389.57	20.6	60.8835	17.2283	0	1.4002	79.512		3.29083	0.907104	0.56097	0.0578453		2.65647	0.667048	0.446621	0.0429801		2.33617	0.554699	0.389529	0.035964		2.1444	0.49052	0.355582	0.0319351		1.73103	0.360709	0.2831	0.0237284		0.06	1.59427	0.705854	0.12		0.3	0.301587	0.082986	0.008		76.5715	21.6675	0	1.761	0.0293897	0.245883
1.2	1390	20.7	60.8908	17.121	0	1.4002	79.412		3.28791	0.905228	0.559756	0.0578061		2.65412	0.665669	0.445655	0.042951		2.3341	0.553552	0.388686	0.0359396		2.1425	0.489506	0.354813	0.0319134		1.7295	0.359963	0.282487	0.0237123		0.06	1.59303	0.705877	0.12		0.3	0.301492	0.0828736	0.008		76.6771	21.5597	0	1.76321	0.0292911	0.245255
1.2	1390.43	20.8	60.8981	17.0137	0	1.4002	79.312		3.285	0.903358	0.558546	0.057767		2.65177	0.664293	0.444692	0.042922		2.33204	0.552408	0.387846	0.0359153		2.1406	0.488495	0.354046	0.0318918		1.72797	0.359219	0.281877	0.0236963		0.06	1.59179	0.705899	0.12		0.3	0.301397	0.0827615	0.008		76.783	21.4516	0	1.76544	0.0291926	0.244625
1.2	1390.87	20.9	60.9054	16.9064	0	1.4002	79.212		3.2821	0.901492	0.557339	0.0577279		2.64942	0.662921	0.443731	0.0428929		2.32998	0.551267	0.387008	0.035891		2.13871	0.487486	0.353281	0.0318703		1.72644	0.358477	0.281268	0.0236802		0.06	1.59055	0.705921	0.12		0.3	0.301301	0.0826496	0.008		76.8892	21.3432	0	1.76767	0.0290942	0.243994
1.2	1391.3	21	60.9127	16.7991	0	1.4002	79.112		3.2792	0.899631	0.556136	0.0576889		2.64708	0.661553	0.442773	0.0428639		2.32792	0.550129	0.386172	0.0358668		2.13682	0.486479	0.352518	0.0318487		1.72491	0.357737	0.28066	0.0236642		0.06	1.58932	0.705944	0.12		0.3	0.301207	0.0825379	0.008		76.9956	21.2345	0	1.7699	0.0289959	0.24336
1.2	1391.74	21.1	60.92	16.6918	0	1.4002	79.012		3.2763	0.897775	0.554935	0.0576499		2.64474	0.660188	0.441817	0.042835		2.32586	0.548994	0.385339	0.0358425		2.13493	0.485476	0.351757	0.0318272		1.72339	0.356999	0.280054	0.0236482		0.06	1.58808	0.705966	0.12		0.3	0.301112	0.0824264	0.008		77.1023	21.1256	0	1.77214	0.0288977	0.242726
1.2	1392.17	21.2	60.9273	16.5845	0	1.4002	78.912		3.2734	0.895924	0.553738	0.057611		2.64241	0.658826	0.440864	0.042806		2.3238	0.547862	0.384507	0.0358183		2.13304	0.484475	0.350998	0.0318057		1.72187	0.356263	0.27945	0.0236323		0.06	1.58685	0.705988	0.12		0.3	0.301017	0.0823151	0.008		77.2092	21.0164	0	1.77439	0.0287996	0.242089
1.2	1392.61	21.3	60.9346	16.4771	0	1.4002	78.812		3.27052	0.894077	0.552544	0.0575721		2.64007	0.657468	0.439913	0.0427772		2.32175	0.546733	0.383678	0.0357941		2.13116	0.483476	0.350241	0.0317842		1.72035	0.355529	0.278848	0.0236163		0.06	1.58562	0.706011	0.12		0.3	0.300922	0.0822041	0.008		77.3165	20.9069	0	1.77664	0.0287016	0.241451
1.2	1393.04	21.4	60.9419	16.3698	0	1.4002	78.712		3.26763	0.892235	0.551354	0.0575332		2.63775	0.656114	0.438965	0.0427483		2.31971	0.545606	0.382851	0.03577		2.12928	0.48248	0.349486	0.0317628		1.71883	0.354797	0.278247	0.0236004		0.06	1.58439	0.706033	0.12		0.3	0.300828	0.0820932	0.008		77.424	20.7972	0	1.77889	0.0286036	0.240811
1.2	1393.48	21.5	60.9492	16.2625	0	1.4002	78.612		3.26475	0.890398	0.550166	0.0574944		2.63542	0.654763	0.43802	0.0427195		2.31766	0.544483	0.382027	0.0357459		2.1274	0.481487	0.348734	0.0317414		1.71731	0.354066	0.277647	0.0235845		0.06	1.58316	0.706055	0.12		0.3	0.300733	0.0819825	0.008		77.5317	20.6871	0	1.78116	0.0285058	0.240169
1.2	1393.91	21.6	60.9565	16.1552	0	1.4002	78.512		3.26187	0.888566	0.548982	0.0574557		2.6331	0.653416	0.437077	0.0426907		2.31562	0.543362	0.381204	0.0357218		2.12553	0.480496	0.347983	0.03172		1.7158	0.353337	0.27705	0.0235686		0.06	1.58194	0.706078	0.12		0.3	0.300638	0.0818721	0.008		77.6398	20.5768	0	1.78343	0.0284081	0.239526
1.2	1394.35	21.7	60.9638	16.0479	0	1.4002	78.412		3.259	0.886738	0.5478	0.057417		2.63078	0.652072	0.436136	0.0426619		2.31358	0.542245	0.380384	0.0356977		2.12366	0.479508	0.347234	0.0316986		1.71429	0.352611	0.276454	0.0235527		0.06	1.58071	0.7061	0.12		0.3	0.300544	0.0817618	0.008		77.7481	20.4662	0	1.7857	0.0283105	0.238881
1.2	1394.78	21.8	60.9711	15.9406	0	1.4002	78.312		3.25613	0.884915	0.546622	0.0573783		2.62846	0.650731	0.435198	0.0426332		2.31154	0.54113	0.379566	0.0356737		2.12179	0.478522	0.346487	0.0316773		1.71278	0.351886	0.275859	0.0235368		0.06	1.57949	0.706122	0.12		0.3	0.30045	0.0816518	0.008		77.8567	20.3553	0	1.78798	0.0282129	0.238234
1.2	1395.22	21.9	60.9784	15.8333	0	1.4002	78.212		3.25326	0.883097	0.545447	0.0573397		2.62615	0.649394	0.434263	0.0426045		2.30951	0.540018	0.37875	0.0356497		2.11992	0.477539	0.345743	0.031656		1.71127	0.351163	0.275266	0.023521		0.06	1.57827	0.706144	0.12		0.3	0.300356	0.0815419	0.008		77.9656	20.2441	0	1.79027	0.0281155	0.237586
1.2	1395.65	22	60.9857	15.726	0	1.4002	78.112		3.2504	0.881284	0.544276	0.0573012		2.62384	0.648061	0.43333	0.0425759		2.30748	0.538909	0.377936	0.0356257		2.11805	0.476558	0.345	0.0316347		1.70977	0.350442	0.274675	0.0235052		0.06	1.57705	0.706167	0.12		0.3	0.300261	0.0814323	0.008		78.0748	20.1327	0	1.79256	0.0280182	0.236936
1.2	1396.09	22.1	60.993	15.6187	0	1.4002	78.012		3.24754	0.879475	0.543107	0.0572626		2.62153	0.646731	0.4324	0.0425472		2.30545	0.537803	0.377125	0.0356018		2.11619	0.47558	0.344259	0.0316134		1.70826	0.349722	0.274085	0.0234894		0.06	1.57583	0.706189	0.12		0.3	0.300167	0.0813229	0.008		78.1842	20.0209	0	1.79486	0.0279209	0.236284
1.2	1396.52	22.2	61.0003	15.5114	0	1.4002	77.912		3.24469	0.877671	0.541941	0.0572242		2.61923	0.645404	0.431472	0.0425187		2.30342	0.5367	0.376316	0.0355778		2.11433	0.474604	0.34352	0.0315922		1.70676	0.349005	0.273497	0.0234736		0.06	1.57461	0.706211	0.12		0.3	0.300073	0.0812137	0.008		78.2939	19.9089	0	1.79716	0.0278238	0.23563
1.2	1396.96	22.3	61.0076	15.4041	0	1.4002	77.812		3.24184	0.875871	0.540779	0.0571858		2.61693	0.64408	0.430546	0.0424901		2.3014	0.535599	0.375508	0.0355539		2.11248	0.473631	0.342783	0.031571		1.70526	0.348289	0.27291	0.0234578		0.06	1.5734	0.706233	0.12		0.3	0.299979	0.0811046	0.008		78.4039	19.7966	0	1.79947	0.0277267	0.234975
1.2	1397.39	22.4	61.0149	15.2968	0	1.4002	77.712		3.239	0.874076	0.53962	0.0571474		2.61463	0.642761	0.429623	0.0424616		2.29938	0.534502	0.374703	0.0355301		2.11062	0.47266	0.342048	0.0315498		1.70377	0.347576	0.272325	0.0234421		0.06	1.57219	0.706256	0.12		0.3	0.299886	0.0809958	0.008		78.5142	19.684	0	1.80178	0.0276297	0.234318
1.2	1397.83	22.5	61.0222	15.1895	0	1.4002	77.612		3.23616	0.872286	0.538463	0.057109		2.61234	0.641444	0.428703	0.0424331		2.29736	0.533407	0.373901	0.0355063		2.10877	0.471692	0.341316	0.0315286		1.70227	0.346864	0.271742	0.0234264		0.06	1.57097	0.706278	0.12		0.3	0.299792	0.0808872	0.008		78.6248	19.5711	0	1.80411	0.0275328	0.233659
1.2	1398.26	22.6	61.0295	15.0822	0	1.4002	77.512		3.23332	0.8705	0.53731	0.0570707		2.61005	0.640131	0.427784	0.0424047		2.29535	0.532315	0.3731	0.0354824		2.10692	0.470727	0.340585	0.0315075		1.70078	0.346154	0.27116	0.0234107		0.06	1.56976	0.7063	0.12		0.3	0.299698	0.0807788	0.008		78.7356	19.4579	0	1.80643	0.027436	0.232998
1.2	1398.7	22.7	61.0368	14.9749	0	1.4002	77.412		3.23048	0.868719	0.53616	0.0570325		2.60776	0.638821	0.426869	0.0423762		2.29334	0.531226	0.372301	0.0354587		2.10508	0.469763	0.339856	0.0314864		1.69929	0.345445	0.270579	0.023395		0.06	1.56855	0.706322	0.12		0.3	0.299604	0.0806706	0.008		78.8468	19.3445	0	1.80877	0.0273393	0.232336
1.2	1399.13	22.8	61.0441	14.8676	0	1.4002	77.312		3.22766	0.866942	0.535013	0.0569943		2.60548	0.637515	0.425956	0.0423479		2.29133	0.530139	0.371505	0.0354349		2.10323	0.468803	0.339128	0.0314653		1.6978	0.344739	0.27	0.0233793		0.06	1.56735	0.706344	0.12		0.3	0.299511	0.0805626	0.008		78.9582	19.2307	0	1.81111	0.0272427	0.231671
1.2	1399.57	22.9	61.0514	14.7603	0	1.4002	77.212		3.22483	0.86517	0.533869	0.0569562		2.6032	0.636212	0.425045	0.0423195		2.28932	0.529056	0.37071	0.0354112		2.10139	0.467845	0.338403	0.0314442		1.69632	0.344034	0.269423	0.0233636		0.06	1.56614	0.706366	0.12		0.3	0.299417	0.0804548	0.008		79.0699	19.1166	0	1.81345	0.0271462	0.231005
1.2	1400	23	61.0588	14.653	0	1.4002	77.112		3.22201	0.863403	0.532728	0.056918		2.60092	0.634912	0.424136	0.0422912		2.28732	0.527975	0.369918	0.0353875		2.09955	0.466889	0.33768	0.0314232		1.69483	0.343331	0.268847	0.023348		0.06	1.56494	0.706389	0.12		0.3	0.299324	0.0803472	0.008		79.1819	19.0023	0	1.8158	0.0270497	0.230338
1.2	1400.43	23.1	61.0661	14.5457	0	1.4002	77.012		3.21919	0.86164	0.53159	0.05688		2.59864	0.633615	0.42323	0.0422629		2.28532	0.526897	0.369128	0.0353638		2.09772	0.465935	0.336959	0.0314022		1.69335	0.34263	0.268273	0.0233324		0.06	1.56374	0.706411	0.12		0.3	0.299231	0.0802398	0.008		79.2942	18.8876	0	1.81816	0.0269534	0.229668
1.2	1400.87	23.2	61.0734	14.4384	0	1.4002	76.912		3.21638	0.859881	0.530455	0.056842		2.59637	0.632322	0.422327	0.0422347		2.28332	0.525822	0.36834	0.0353402		2.09588	0.464985	0.336239	0.0313812		1.69187	0.341931	0.2677	0.0233168		0.06	1.56253	0.706433	0.12		0.3	0.299138	0.0801325	0.008		79.4068	18.7727	0	1.82053	0.0268571	0.228997
1.2	1401.3	23.3	61.0807	14.3311	0	1.4002	76.812		3.21357	0.858127	0.529323	0.056804		2.5941	0.631033	0.421426	0.0422065		2.28133	0.524749	0.367554	0.0353166		2.09405	0.464036	0.335522	0.0313602		1.69039	0.341234	0.267129	0.0233012		0.06	1.56134	0.706455	0.12		0.3	0.299044	0.0800255	0.008		79.5197	18.6574	0	1.8229	0.0267609	0.228324
1.2	1401.74	23.4	61.088	14.2238	0	1.4002	76.712		3.21076	0.856378	0.528194	0.0567661		2.59184	0.629746	0.420527	0.0421783		2.27933	0.523679	0.36677	0.035293		2.09222	0.46309	0.334806	0.0313393		1.68892	0.340538	0.266559	0.0232857		0.06	1.56014	0.706477	0.12		0.3	0.298951	0.0799187	0.008		79.6329	18.5418	0	1.82527	0.0266649	0.227648
1.2	1402.17	23.5	61.0953	14.1165	0	1.4002	76.612		3.20796	0.854633	0.527068	0.0567282		2.58958	0.628463	0.41963	0.0421501		2.27735	0.522612	0.365988	0.0352695		2.0904	0.462146	0.334093	0.0313184		1.68744	0.339844	0.265991	0.0232701		0.06	1.55894	0.706499	0.12		0.3	0.298858	0.0798121	0.008		79.7464	18.426	0	1.82766	0.0265688	0.226972
1.2	1402.61	23.6	61.1026	14.0092	0	1.4002	76.512		3.20516	0.852892	0.525945	0.0566904		2.58732	0.627183	0.418736	0.042122		2.27536	0.521548	0.365208	0.0352459		2.08857	0.461205	0.333381	0.0312975		1.68597	0.339152	0.265424	0.0232546		0.06	1.55775	0.706521	0.12		0.3	0.298765	0.0797057	0.008		79.8601	18.3098	0	1.83004	0.0264729	0.226293
1.2	1403.04	23.7	61.1099	13.9019	0	1.4002	76.412		3.20237	0.851156	0.524825	0.0566526		2.58506	0.625906	0.417845	0.0420939		2.27338	0.520486	0.364431	0.0352225		2.08675	0.460266	0.332671	0.0312766		1.6845	0.338462	0.264859	0.0232391		0.06	1.55655	0.706543	0.12		0.3	0.298673	0.0795995	0.008		79.9742	18.1934	0	1.83244	0.0263771	0.225612
1.2	1403.48	23.8	61.1172	13.7946	0	1.4002	76.312		3.19958	0.849425	0.523708	0.0566148		2.58281	0.624633	0.416955	0.0420659		2.27139	0.519427	0.363655	0.035199		2.08494	0.45933	0.331963	0.0312558		1.68303	0.337773	0.264295	0.0232236		0.06	1.55536	0.706565	0.12		0.3	0.29858	0.0794934	0.008		80.0886	18.0766	0	1.83484	0.0262813	0.22493
1.2	1403.91	23.9	61.1245	13.6873	0	1.4002	76.212		3.19679	0.847697	0.522594	0.0565771		2.58056	0.623363	0.416068	0.0420379		2.26942	0.518371	0.362881	0.0351755		2.08312	0.458396	0.331257	0.031235		1.68157	0.337086	0.263733	0.0232082		0.06	1.55417	0.706587	0.12		0.3	0.298487	0.0793876	0.008		80.2032	17.9595	0	1.83725	0.0261856	0.224246
1.2	1404.35	24	61.1318	13.58	0	1.4002	76.112		3.19401	0.845975	0.521483	0.0565395		2.57832	0.622096	0.415184	0.0420099		2.26744	0.517318	0.36211	0.0351521		2.08131	0.457464	0.330552	0.0312142		1.6801	0.336401	0.263172	0.0231927		0.06	1.55298	0.706609	0.12		0.3	0.298395	0.079282	0.008		80.3182	17.8421	0	1.83966	0.02609	0.22356
1.2	1404.78	24.1	61.1391	13.4727	0	1.4002	76.012		3.19123	0.844256	0.520375	0.0565018		2.57607	0.620832	0.414301	0.041982		2.26547	0.516267	0.36134	0.0351287		2.0795	0.456535	0.32985	0.0311934		1.67864	0.335718	0.262613	0.0231773		0.06	1.5518	0.706631	0.12		0.3	0.298302	0.0791766	0.008		80.4335	17.7245	0	1.84208	0.0259945	0.222872
1.2	1405.22	24.2	61.1464	13.3654	0	1.4002	75.912		3.18846	0.842542	0.51927	0.0564643		2.57383	0.619572	0.413422	0.041954		2.2635	0.515219	0.360573	0.0351054		2.07769	0.455608	0.329149	0.0311727		1.67718	0.335036	0.262055	0.0231619		0.06	1.55061	0.706653	0.12		0.3	0.29821	0.0790713	0.008		80.549	17.6064	0	1.84451	0.0258991	0.222182
1.2	1405.65	24.3	61.1537	13.2581	0	1.4002	75.812		3.18568	0.840832	0.518168	0.0564268		2.5716	0.618314	0.412544	0.0419262		2.26153	0.514173	0.359807	0.0350821		2.07588	0.454684	0.328451	0.0311519		1.67572	0.334356	0.261499	0.0231465		0.06	1.54943	0.706675	0.12		0.3	0.298117	0.0789663	0.008		80.6649	17.4881	0	1.84694	0.0258037	0.22149
1.2	1406.09	24.4	61.161	13.1508	0	1.4002	75.712		3.18292	0.839127	0.517068	0.0563893		2.56936	0.61706	0.411669	0.0418983		2.25957	0.51313	0.359044	0.0350588		2.07408	0.453762	0.327754	0.0311312		1.67427	0.333678	0.260944	0.0231311		0.06	1.54824	0.706697	0.12		0.3	0.298025	0.0788614	0.008		80.7811	17.3695	0	1.84938	0.0257085	0.220797
1.2	1406.52	24.5	61.1683	13.0435	0	1.4002	75.612		3.18015	0.837426	0.515972	0.0563518		2.56713	0.61581	0.410796	0.0418705		2.25761	0.51209	0.358283	0.0350355		2.07228	0.452842	0.327059	0.0311106		1.67282	0.333002	0.260391	0.0231158		0.06	1.54706	0.706719	0.12		0.3	0.297933	0.0787567	0.008		80.8976	17.2506	0	1.85183	0.0256133	0.220101
1.2	1406.96	24.6	61.1756	12.9362	0	1.4002	75.512		3.17739	0.835729	0.514878	0.0563145		2.5649	0.614562	0.409925	0.0418427		2.25565	0.511053	0.357523	0.0350122		2.07048	0.451924	0.326366	0.0310899		1.67136	0.332327	0.259839	0.0231004		0.06	1.54588	0.706741	0.12		0.3	0.29784	0.0786523	0.008		81.0144	17.1313	0	1.85428	0.0255182	0.219404
1.2	1407.39	24.7	61.1829	12.8289	0	1.4002	75.412		3.17464	0.834037	0.513787	0.0562771		2.56268	0.613317	0.409057	0.041815		2.25369	0.510018	0.356766	0.034989		2.06868	0.451009	0.325674	0.0310693		1.66991	0.331654	0.259289	0.0230851		0.06	1.5447	0.706763	0.12		0.3	0.297748	0.078548	0.008		81.1315	17.0117	0	1.85674	0.0254231	0.218705
1.2	1407.83	24.8	61.1902	12.7216	0	1.4002	75.312		3.17189	0.832349	0.512699	0.0562398		2.56046	0.612076	0.40819	0.0417873		2.25174	0.508985	0.35601	0.0349658		2.06689	0.450096	0.324985	0.0310487		1.66847	0.330983	0.25874	0.0230698		0.06	1.54353	0.706785	0.12		0.3	0.297656	0.0784439	0.008		81.2489	16.8919	0	1.8592	0.0253282	0.218003
1.2	1408.26	24.9	61.1975	12.6143	0	1.4002	75.212		3.16914	0.830665	0.511614	0.0562025		2.55824	0.610838	0.407327	0.0417596		2.24979	0.507956	0.355257	0.0349427		2.0651	0.449186	0.324297	0.0310282		1.66702	0.330313	0.258192	0.0230545		0.06	1.54235	0.706807	0.12		0.3	0.297564	0.07834	0.008		81.3667	16.7717	0	1.86168	0.0252333	0.2173
1.2	1408.7	25	61.2048	12.507	0	1.4002	75.112		3.16639	0.828986	0.510532	0.0561653		2.55602	0.609603	0.406465	0.0417319		2.24784	0.506929	0.354506	0.0349195		2.06331	0.448278	0.323611	0.0310076		1.66558	0.329645	0.257646	0.0230392		0.06	1.54118	0.706829	0.12		0.3	0.297473	0.0782363	0.008		81.4847	16.6511	0	1.86415	0.0251385	0.216595
1.2	1409.13	25.1	61.2121	12.3997	0	1.4002	75.012		3.16365	0.82731	0.509453	0.0561282		2.55381	0.608371	0.405606	0.0417043		2.24589	0.505904	0.353756	0.0348964		2.06153	0.447372	0.322927	0.0309871		1.66414	0.328979	0.257101	0.023024		0.06	1.54001	0.706851	0.12		0.3	0.297381	0.0781328	0.008		81.6031	16.5303	0	1.86664	0.0250437	0.215888
1.2	1409.57	25.2	61.2194	12.2924	0	1.4002	74.912		3.16092	0.825639	0.508376	0.056091		2.5516	0.607142	0.404749	0.0416767		2.24395	0.504883	0.353009	0.0348733		2.05974	0.446468	0.322244	0.0309666		1.6627	0.328315	0.256558	0.0230088		0.06	1.53884	0.706873	0.12		0.3	0.297289	0.0780295	0.008		81.7218	16.4091	0	1.86913	0.0249491	0.215179
1.2	1410	25.3	61.2267	12.1851	0	1.4002	74.812		3.15818	0.823973	0.507303	0.0560539		2.5494	0.605916	0.403894	0.0416492		2.24201	0.503863	0.352263	0.0348503		2.05796	0.445567	0.321564	0.0309461		1.66126	0.327652	0.256016	0.0229936		0.06	1.53767	0.706895	0.12		0.3	0.297198	0.0779264	0.008		81.8408	16.2876	0	1.87163	0.0248545	0.214468
1.2	1410.43	25.4	61.234	12.0778	0	1.4002	74.712		3.15546	0.82231	0.506232	0.0560169		2.54719	0.604694	0.403041	0.0416216		2.24007	0.502847	0.35152	0.0348272		2.05618	0.444668	0.320885	0.0309257		1.65982	0.326991	0.255476	0.0229784		0.06	1.5365	0.706917	0.12		0.3	0.297106	0.0778234	0.008		81.9601	16.1658	0	1.87413	0.02476	0.213755
1.2	1410.87	25.5	61.2413	11.9705	0	1.4002	74.612		3.15273	0.820652	0.505164	0.0559799		2.54499	0.603474	0.402191	0.0415941		2.23814	0.501833	0.350778	0.0348042		2.05441	0.443771	0.320208	0.0309052		1.65839	0.326331	0.254937	0.0229632		0.06	1.53533	0.706938	0.12		0.3	0.297015	0.0777207	0.008		82.0797	16.0436	0	1.87665	0.0246655	0.21304
1.2	1411.3	25.6	61.2486	11.8632	0	1.4002	74.512		3.15001	0.818998	0.504099	0.055943		2.5428	0.602258	0.401343	0.0415667		2.23621	0.500821	0.350038	0.0347813		2.05264	0.442876	0.319533	0.0308848		1.65696	0.325674	0.254399	0.022948		0.06	1.53417	0.70696	0.12		0.3	0.296923	0.0776181	0.008		82.1997	15.9212	0	1.87916	0.0245712	0.212323
1.2	1411.74	25.7	61.2559	11.7559	0	1.4002	74.412		3.14729	0.817348	0.503036	0.0559061		2.5406	0.601045	0.400497	0.0415393		2.23428	0.499812	0.349301	0.0347583		2.05086	0.441984	0.31886	0.0308645		1.65553	0.325018	0.253863	0.0229329		0.06	1.53301	0.706982	0.12		0.3	0.296832	0.0775157	0.008		82.3199	15.7984	0	1.88169	0.0244769	0.211605
1.2	1412.17	25.8	61.2632	11.6486	0	1.4002	74.312		3.14458	0.815702	0.501977	0.0558692		2.53841	0.599834	0.399654	0.0415119		2.23235	0.498806	0.348565	0.0347354		2.0491	0.441094	0.318188	0.0308441		1.6541	0.324363	0.253328	0.0229178		0.06	1.53185	0.707004	0.12		0.3	0.296741	0.0774136	0.008		82.4405	15.6752	0	1.88422	0.0243827	0.210884
1.2	1412.61	25.9	61.2705	11.5413	0	1.4002	74.212		3.14187	0.81406	0.50092	0.0558324		2.53623	0.598627	0.398812	0.0414845		2.23043	0.497802	0.347831	0.0347125		2.04733	0.440207	0.317518	0.0308238		1.65268	0.32371	0.252795	0.0229027		0.06	1.53069	0.707026	0.12		0.3	0.296649	0.0773116	0.008		82.5615	15.5518	0	1.88676	0.0242885	0.210161
1.2	1413.04	26	61.2778	11.434	0	1.4002	74.112		3.13916	0.812423	0.499866	0.0557956		2.53404	0.597423	0.397973	0.0414572		2.2285	0.496801	0.347099	0.0346896		2.04557	0.439321	0.31685	0.0308035		1.65125	0.323059	0.252263	0.0228876		0.06	1.52953	0.707048	0.12		0.3	0.296558	0.0772098	0.008		82.6827	15.428	0	1.88931	0.0241944	0.209436
1.2	1413.48	26.1	61.2851	11.3267	0	1.4002	74.012		3.13646	0.810789	0.498815	0.0557588		2.53186	0.596222	0.397136	0.0414299		2.22659	0.495802	0.346369	0.0346668		2.0438	0.438438	0.316183	0.0307832		1.64983	0.32241	0.251732	0.0228725		0.06	1.52837	0.707069	0.12		0.3	0.296467	0.0771081	0.008		82.8043	15.3038	0	1.89186	0.0241004	0.208709
1.2	1413.91	26.2	61.2924	11.2194	0	1.4002	73.912		3.13376	0.80916	0.497766	0.0557222		2.52968	0.595024	0.396301	0.0414026		2.22467	0.494805	0.345641	0.034644		2.04205	0.437557	0.315519	0.0307629		1.64841	0.321762	0.251203	0.0228575		0.06	1.52721	0.707091	0.12		0.3	0.296376	0.0770067	0.008		82.9262	15.1794	0	1.89442	0.0240065	0.20798
1.2	1414.35	26.3	61.2997	11.1121	0	1.4002	73.812		3.13106	0.807535	0.49672	0.0556855		2.5275	0.593829	0.395468	0.0413754		2.22276	0.493812	0.344915	0.0346212		2.04029	0.436678	0.314856	0.0307427		1.64699	0.321116	0.250675	0.0228424		0.06	1.52606	0.707113	0.12		0.3	0.296285	0.0769054	0.008		83.0485	15.0546	0	1.89699	0.0239126	0.207249
1.2	1414.78	26.4	61.307	11.0048	0	1.4002	73.712		3.12837	0.805914	0.495677	0.0556489		2.52533	0.592637	0.394638	0.0413482		2.22085	0.49282	0.344191	0.0345984		2.03854	0.435802	0.314195	0.0307225		1.64558	0.320471	0.250149	0.0228274		0.06	1.52491	0.707135	0.12		0.3	0.296195	0.0768044	0.008		83.171	14.9294	0	1.89956	0.0238188	0.206516
1.2	1415.22	26.5	61.3143	10.8975	0	1.4002	73.612		3.12568	0.804297	0.494637	0.0556123		2.52316	0.591448	0.39381	0.041321		2.21894	0.491832	0.343468	0.0345757		2.03678	0.434927	0.313535	0.0307023		1.64416	0.319828	0.249624	0.0228124		0.06	1.52376	0.707157	0.12		0.3	0.296104	0.0767035	0.008		83.2939	14.8039	0	1.90214	0.0237251	0.205781
1.2	1415.65	26.6	61.3216	10.7902	0	1.4002	73.512		3.123	0.802684	0.493599	0.0555758		2.52099	0.590262	0.392984	0.0412939		2.21703	0.490845	0.342748	0.034553		2.03503	0.434055	0.312878	0.0306822		1.64275	0.319187	0.2491	0.0227974		0.06	1.52261	0.707178	0.12		0.3	0.296013	0.0766028	0.008		83.4172	14.6781	0	1.90473	0.0236314	0.205044
1.2	1416.09	26.7	61.3289	10.6829	0	1.4002	73.412		3.12032	0.801076	0.492564	0.0555393		2.51883	0.589079	0.39216	0.0412668		2.21513	0.489862	0.342029	0.0345303		2.03329	0.433185	0.312222	0.030662		1.64134	0.318547	0.248578	0.0227825		0.06	1.52146	0.7072	0.12		0.3	0.295923	0.0765023	0.008		83.5407	14.5519	0	1.90732	0.0235378	0.204305
1.2	1416.52	26.8	61.3362	10.5756	0	1.4002	73.312		3.11764	0.799471	0.491532	0.0555029		2.51667	0.587899	0.391338	0.0412397		2.21323	0.48888	0.341312	0.0345077		2.03154	0.432317	0.311567	0.0306419		1.63993	0.317909	0.248057	0.0227675		0.06	1.52031	0.707222	0.12		0.3	0.295832	0.0764019	0.008		83.6647	14.4254	0	1.90992	0.0234442	0.203563
1.2	1416.96	26.9	61.3435	10.4683	0	1.4002	73.212		3.11497	0.79787	0.490502	0.0554665		2.51451	0.586722	0.390518	0.0412127		2.21133	0.487902	0.340597	0.034485		2.0298	0.431452	0.310915	0.0306218		1.63853	0.317272	0.247538	0.0227526		0.06	1.51917	0.707243	0.12		0.3	0.295742	0.0763018	0.008		83.7889	14.2986	0	1.91253	0.0233508	0.20282
1.2	1417.39	27	61.3508	10.361	0	1.4002	73.112		3.1123	0.796273	0.489476	0.0554302		2.51236	0.585548	0.389701	0.0411857		2.20944	0.486925	0.339884	0.0344624		2.02806	0.430588	0.310264	0.0306017		1.63712	0.316637	0.247019	0.0227377		0.06	1.51802	0.707265	0.12		0.3	0.295652	0.0762018	0.008		83.9135	14.1714	0	1.91515	0.0232574	0.202074
1.2	1417.83	27.1	61.3581	10.2537	0	1.4002	73.012		3.10963	0.794681	0.488451	0.0553938		2.5102	0.584376	0.388885	0.0411587		2.20754	0.485951	0.339173	0.0344399		2.02632	0.429727	0.309615	0.0305817		1.63572	0.316004	0.246503	0.0227228		0.06	1.51688	0.707287	0.12		0.3	0.295561	0.076102	0.008		84.0384	14.0438	0	1.91777	0.023164	0.201327
1.2	1418.26	27.2	61.3654	10.1464	0	1.4002	72.912		3.10697	0.793092	0.48743	0.0553576		2.50806	0.583208	0.388072	0.0411317		2.20565	0.48498	0.338464	0.0344173		2.02459	0.428868	0.308967	0.0305617		1.63432	0.315372	0.245987	0.0227079		0.06	1.51574	0.707309	0.12		0.3	0.295471	0.0760024	0.008		84.1637	13.9159	0	1.9204	0.0230707	0.200577
1.2	1418.7	27.3	61.3727	10.0391	0	1.4002	72.812		3.10431	0.791508	0.486411	0.0553214		2.50591	0.582043	0.387261	0.0411048		2.20377	0.484011	0.337756	0.0343948		2.02286	0.428011	0.308321	0.0305417		1.63292	0.314742	0.245473	0.022693		0.06	1.5146	0.70733	0.12		0.3	0.295381	0.075903	0.008		84.2893	13.7876	0	1.92304	0.0229775	0.199825
1.2	1419.13	27.4	61.38	9.93175	0	1.4002	72.712		3.10166	0.789927	0.485395	0.0552852		2.50377	0.580881	0.386452	0.0410779		2.20188	0.483044	0.337051	0.0343723		2.02113	0.427156	0.307677	0.0305217		1.63152	0.314114	0.24496	0.0226782		0.06	1.51346	0.707352	0.12		0.3	0.295291	0.0758038	0.008		84.4153	13.659	0	1.92568	0.0228843	0.199071
1.2	1419.57	27.5	61.3873	9.82445	0	1.4002	72.612		3.09901	0.78835	0.484381	0.055249		2.50163	0.579721	0.385645	0.0410511		2.2	0.48208	0.336347	0.0343498		2.0194	0.426304	0.307035	0.0305017		1.63013	0.313487	0.244449	0.0226634		0.06	1.51232	0.707374	0.12		0.3	0.295201	0.0757047	0.008		84.5416	13.5301	0	1.92834	0.0227912	0.198315
1.2	1420	27.6	61.3946	9.71715	0	1.4002	72.512		3.09636	0.786777	0.48337	0.0552129		2.49949	0.578565	0.38484	0.0410243		2.19812	0.481118	0.335645	0.0343274		2.01767	0.425453	0.306394	0.0304818		1.62874	0.312861	0.243938	0.0226486		0.06	1.51119	0.707395	0.12		0.3	0.295111	0.0756058	0.008		84.6683	13.4008	0	1.931	0.0226982	0.197557
1.2	1420.43	27.7	61.4019	9.60985	0	1.4002	72.412		3.09371	0.785209	0.482362	0.0551769		2.49735	0.577411	0.384037	0.0409975		2.19624	0.480159	0.334945	0.034305		2.01595	0.424605	0.305755	0.0304619		1.62735	0.312237	0.243429	0.0226338		0.06	1.51005	0.707417	0.12		0.3	0.295021	0.0755071	0.008		84.7953	13.2711	0	1.93366	0.0226052	0.196796
1.2	1420.87	27.8	61.4092	9.50255	0	1.4002	72.312		3.09107	0.783644	0.481356	0.0551409		2.49522	0.57626	0.383236	0.0409707		2.19437	0.479202	0.334246	0.0342826		2.01423	0.423759	0.305117	0.030442		1.62596	0.311615	0.242922	0.022619		0.06	1.50892	0.707438	0.12		0.3	0.294931	0.0754086	0.008		84.9226	13.141	0	1.93634	0.0225123	0.196034
1.2	1421.3	27.9	61.4165	9.39524	0	1.4002	72.212		3.08844	0.782083	0.480353	0.0551049		2.49309	0.575112	0.382438	0.040944		2.19249	0.478247	0.33355	0.0342602		2.01251	0.422915	0.304481	0.0304222		1.62457	0.310994	0.242416	0.0226043		0.06	1.50779	0.70746	0.12		0.3	0.294842	0.0753103	0.008		85.0503	13.0106	0	1.93902	0.0224194	0.195269
1.2	1421.74	28	61.4238	9.28794	0	1.4002	72.112		3.0858	0.780526	0.479353	0.055069		2.49097	0.573967	0.381641	0.0409173		2.19063	0.477295	0.332855	0.0342379		2.0108	0.422073	0.303847	0.0304023		1.62319	0.310375	0.241911	0.0225895		0.06	1.50666	0.707482	0.12		0.3	0.294752	0.0752121	0.008		85.1784	12.8799	0	1.94171	0.0223266	0.194502
1.2	1422.17	28.1	61.4311	9.18064	0	1.4002	72.012		3.08317	0.778972	0.478355	0.0550331		2.48884	0.572825	0.380847	0.0408906		2.18876	0.476346	0.332162	0.0342156		2.00908	0.421233	0.303215	0.0303825		1.6218	0.309758	0.241407	0.0225748		0.06	1.50553	0.707503	0.12		0.3	0.294663	0.0751141	0.008		85.3068	12.7488	0	1.9444	0.0222339	0.193733
1.2	1422.61	28.2	61.4384	9.07334	0	1.4002	71.912		3.08055	0.777423	0.47736	0.0549972		2.48673	0.571686	0.380054	0.040864		2.18689	0.475398	0.331471	0.0341933		2.00737	0.420395	0.302584	0.0303627		1.62042	0.309142	0.240905	0.0225601		0.06	1.50441	0.707525	0.12		0.3	0.294573	0.0750163	0.008		85.4356	12.6173	0	1.94711	0.0221412	0.192961
1.2	1423.04	28.3	61.4457	8.96604	0	1.4002	71.812		3.07792	0.775878	0.476367	0.0549614		2.48461	0.570549	0.379264	0.0408374		2.18503	0.474453	0.330782	0.034171		2.00566	0.419559	0.301955	0.030343		1.61904	0.308527	0.240404	0.0225454		0.06	1.50328	0.707546	0.12		0.3	0.294484	0.0749187	0.008		85.5647	12.4854	0	1.94982	0.0220486	0.192188
1.2	1423.48	28.4	61.453	8.85874	0	1.4002	71.712		3.0753	0.774336	0.475377	0.0549257		2.48249	0.569416	0.378476	0.0408108		2.18317	0.47351	0.330094	0.0341488		2.00396	0.418726	0.301327	0.0303232		1.61766	0.307914	0.239904	0.0225307		0.06	1.50216	0.707568	0.12		0.3	0.294394	0.0748212	0.008		85.6942	12.3532	0	1.95254	0.021956	0.191412
1.2	1423.91	28.5	61.4603	8.75144	0	1.4002	71.612		3.07269	0.772799	0.474389	0.05489		2.48038	0.568285	0.37769	0.0407843		2.18132	0.47257	0.329409	0.0341266		2.00225	0.417894	0.300701	0.0303035		1.61629	0.307303	0.239406	0.0225161		0.06	1.50103	0.70759	0.12		0.3	0.294305	0.074724	0.008		85.8241	12.2206	0	1.95526	0.0218635	0.190634
1.2	1424.35	28.6	61.4676	8.64413	0	1.4002	71.512		3.07008	0.771265	0.473404	0.0548543		2.47827	0.567157	0.376905	0.0407578		2.17946	0.471632	0.328725	0.0341044		2.00055	0.417065	0.300077	0.0302838		1.61491	0.306693	0.238909	0.0225015		0.06	1.49991	0.707611	0.12		0.3	0.294216	0.0746269	0.008		85.9543	12.0877	0	1.958	0.021771	0.189854
1.2	1424.78	28.7	61.4749	8.53683	0	1.4002	71.412		3.06747	0.769735	0.472422	0.0548186		2.47617	0.566032	0.376123	0.0407313		2.17761	0.470697	0.328042	0.0340823		1.99885	0.416237	0.299454	0.0302641		1.61354	0.306084	0.238413	0.0224868		0.06	1.49879	0.707633	0.12		0.3	0.294127	0.0745299	0.008		86.0849	11.9543	0	1.96074	0.0216786	0.189071
1.2	1425.22	28.8	61.4822	8.42953	0	1.4002	71.312		3.06486	0.768208	0.471442	0.0547831		2.47407	0.56491	0.375343	0.0407049		2.17576	0.469763	0.327362	0.0340601		1.99715	0.415412	0.298833	0.0302445		1.61217	0.305477	0.237919	0.0224722		0.06	1.49767	0.707654	0.12		0.3	0.294038	0.0744332	0.008		86.2159	11.8206	0	1.96349	0.0215862	0.188286
1.2	1425.65	28.9	61.4895	8.32223	0	1.4002	71.212		3.06226	0.766686	0.470465	0.0547475		2.47197	0.56379	0.374565	0.0406784		2.17391	0.468832	0.326683	0.034038		1.99546	0.414589	0.298213	0.0302249		1.6108	0.304872	0.237425	0.0224576		0.06	1.49656	0.707676	0.12		0.3	0.293949	0.0743366	0.008		86.3472	11.6866	0	1.96625	0.0214939	0.187499
1.2	1426.09	29	61.4968	8.21493	0	1.4002	71.112		3.05967	0.765167	0.46949	0.054712		2.46987	0.562674	0.373789	0.0406521		2.17207	0.467904	0.326006	0.0340159		1.99377	0.413768	0.297595	0.0302053		1.60944	0.304268	0.236933	0.0224431		0.06	1.49544	0.707697	0.12		0.3	0.29386	0.0742402	0.008		86.4789	11.5521	0	1.96901	0.0214017	0.18671
1.2	1426.52	29.1	61.5041	8.10763	0	1.4002	71.012		3.05707	0.763653	0.468517	0.0546765		2.46778	0.56156	0.373015	0.0406257		2.17023	0.466977	0.325331	0.0339939		1.99207	0.412948	0.296979	0.0301857		1.60807	0.303666	0.236443	0.0224285		0.06	1.49433	0.707719	0.12		0.3	0.293771	0.074144	0.008		86.611	11.4173	0	1.97178	0.0213094	0.185918
1.2	1426.96	29.2	61.5114	8.00032	0	1.4002	70.912		3.05448	0.762142	0.467548	0.0546411		2.46568	0.560448	0.372242	0.0405994		2.16839	0.466053	0.324658	0.0339719		1.99039	0.412131	0.296364	0.0301661		1.60671	0.303065	0.235953	0.022414		0.06	1.49322	0.70774	0.12		0.3	0.293682	0.074048	0.008		86.7434	11.282	0	1.97456	0.0212173	0.185124
1.2	1427.39	29.3	61.5188	7.89302	0	1.4002	70.812		3.05189	0.760634	0.46658	0.0546057		2.4636	0.55934	0.371472	0.0405731		2.16655	0.465132	0.323986	0.0339499		1.9887	0.411316	0.295751	0.0301466		1.60535	0.302466	0.235465	0.0223995		0.06	1.4921	0.707762	0.12		0.3	0.293594	0.0739521	0.008		86.8762	11.1465	0	1.97735	0.0211252	0.184328
1.2	1427.83	29.4	61.5261	7.78572	0	1.4002	70.712		3.04931	0.759131	0.465615	0.0545703		2.46151	0.558234	0.370704	0.0405468		2.16472	0.464212	0.323316	0.0339279		1.98702	0.410503	0.29514	0.0301271		1.60399	0.301868	0.234978	0.022385		0.06	1.49099	0.707783	0.12		0.3	0.293505	0.0738564	0.008		87.0094	11.0105	0	1.98015	0.0210331	0.18353
1.2	1428.26	29.5	61.5334	7.67842	0	1.4002	70.612		3.04673	0.757631	0.464653	0.054535		2.45943	0.557131	0.369938	0.0405206		2.16289	0.463295	0.322648	0.0339059		1.98534	0.409692	0.29453	0.0301076		1.60263	0.301271	0.234492	0.0223705		0.06	1.48989	0.707804	0.12		0.3	0.293417	0.0737608	0.008		87.1429	10.8741	0	1.98295	0.0209411	0.182729
1.2	1428.7	29.6	61.5407	7.57112	0	1.4002	70.512		3.04415	0.756135	0.463693	0.0544998		2.45735	0.556031	0.369174	0.0404944		2.16106	0.46238	0.321981	0.033884		1.98366	0.408883	0.293921	0.0300881		1.60128	0.300676	0.234008	0.022356		0.06	1.48878	0.707826	0.12		0.3	0.293328	0.0736655	0.008		87.2769	10.7374	0	1.98577	0.0208492	0.181925
1.2	1429.13	29.7	61.548	7.46382	0	1.4002	70.412		3.04158	0.754642	0.462736	0.0544645		2.45527	0.554934	0.368411	0.0404682		2.15923	0.461468	0.321317	0.0338621		1.98198	0.408076	0.293314	0.0300686		1.59992	0.300083	0.233525	0.0223416		0.06	1.48767	0.707847	0.12		0.3	0.29324	0.0735703	0.008		87.4112	10.6002	0	1.98859	0.0207573	0.18112
1.2	1429.57	29.8	61.5553	7.35651	0	1.4002	70.312		3.03901	0.753154	0.461781	0.0544294		2.4532	0.553839	0.367651	0.0404421		2.15741	0.460557	0.320653	0.0338402		1.98031	0.407271	0.292709	0.0300492		1.59857	0.299491	0.233043	0.0223271		0.06	1.48657	0.707869	0.12		0.3	0.293152	0.0734753	0.008		87.5459	10.4627	0	1.99141	0.0206654	0.180312
1.2	1430	29.9	61.5626	7.24921	0	1.4002	70.212		3.03644	0.751669	0.460828	0.0543942		2.45112	0.552747	0.366893	0.0404159		2.15559	0.459649	0.319992	0.0338184		1.97863	0.406468	0.292105	0.0300298		1.59722	0.2989	0.232562	0.0223127		0.06	1.48547	0.70789	0.12		0.3	0.293063	0.0733804	0.008		87.681	10.3248	0	1.99425	0.0205736	0.179502
1.2	1430.43	30	61.5699	7.14191	0	1.4002	70.112		3.03388	0.750188	0.459878	0.0543591		2.44906	0.551658	0.366136	0.0403899		2.15377	0.458743	0.319332	0.0337965		1.97696	0.405667	0.291503	0.0300104		1.59587	0.298311	0.232083	0.0222983		0.06	1.48436	0.707912	0.12		0.3	0.292975	0.0732858	0.008		87.8165	10.1864	0	1.99709	0.0204818	0.178689
1.2	1430.87	30.1	61.5772	7.03461	0	1.4002	70.012		3.03132	0.74871	0.458931	0.054324		2.44699	0.550571	0.365382	0.0403638		2.15195	0.45784	0.318674	0.0337747		1.9753	0.404868	0.290902	0.0299911		1.59453	0.297724	0.231605	0.0222839		0.06	1.48326	0.707933	0.12		0.3	0.292887	0.0731913	0.008		87.9523	10.0477	0	1.99995	0.0203901	0.177874
1.2	1431.3	30.2	61.5845	6.92731	0	1.4002	69.912		3.02877	0.747236	0.457986	0.054289		2.44493	0.549487	0.36463	0.0403378		2.15014	0.456939	0.318018	0.033753		1.97363	0.404071	0.290303	0.0299717		1.59318	0.297138	0.231128	0.0222696		0.06	1.48216	0.707954	0.12		0.3	0.292799	0.0730969	0.008		88.0886	9.90861	0	2.00281	0.0202984	0.177056
1.2	1431.74	30.3	61.5918	6.82001	0	1.4002	69.812		3.02622	0.745766	0.457043	0.054254		2.44287	0.548406	0.363879	0.0403118		2.14832	0.456039	0.317364	0.0337312		1.97197	0.403276	0.289706	0.0299524		1.59184	0.296553	0.230652	0.0222552		0.06	1.48107	0.707976	0.12		0.3	0.292711	0.0730028	0.008		88.2252	9.76911	0	2.00568	0.0202068	0.176237
1.2	1432.17	30.4	61.5991	6.71271	0	1.4002	69.712		3.02367	0.744299	0.456103	0.0542191		2.44081	0.547328	0.36313	0.0402858		2.14651	0.455143	0.316711	0.0337095		1.97031	0.402483	0.28911	0.0299331		1.5905	0.29597	0.230177	0.0222409		0.06	1.47997	0.707997	0.12		0.3	0.292623	0.0729088	0.008		88.3622	9.6292	0	2.00855	0.0201152	0.175414
1.2	1432.61	30.5	61.6064	6.6054	0	1.4002	69.612		3.02112	0.742836	0.455165	0.0541842		2.43875	0.546252	0.362384	0.0402599		2.14471	0.454248	0.316059	0.0336878		1.96865	0.401692	0.288515	0.0299139		1.58916	0.295388	0.229704	0.0222266		0.06	1.47888	0.708018	0.12		0.3	0.292535	0.072815	0.008		88.4997	9.48889	0	2.01144	0.0200236	0.17459
1.2	1433.04	30.6	61.6137	6.4981	0	1.4002	69.512		3.01858	0.741377	0.454229	0.0541493		2.4367	0.545179	0.361639	0.040234		2.1429	0.453355	0.31541	0.0336661		1.96699	0.400903	0.287922	0.0298946		1.58782	0.294808	0.229232	0.0222123		0.06	1.47778	0.70804	0.12		0.3	0.292448	0.0727213	0.008		88.6375	9.34818	0	2.01433	0.0199321	0.173762
1.2	1433.48	30.7	61.621	6.3908	0	1.4002	69.412		3.01604	0.739921	0.453296	0.0541145		2.43465	0.544108	0.360896	0.0402081		2.1411	0.452465	0.314762	0.0336445		1.96534	0.400115	0.287331	0.0298754		1.58649	0.294229	0.228761	0.022198		0.06	1.47669	0.708061	0.12		0.3	0.29236	0.0726278	0.008		88.7757	9.20706	0	2.01723	0.0198406	0.172933
1.2	1433.91	30.8	61.6283	6.2835	0	1.4002	69.312		3.01351	0.738469	0.452365	0.0540797		2.43261	0.54304	0.360155	0.0401823		2.1393	0.451577	0.314116	0.0336228		1.96369	0.39933	0.286741	0.0298562		1.58516	0.293651	0.228291	0.0221837		0.06	1.4756	0.708082	0.12		0.3	0.292272	0.0725345	0.008		88.9143	9.06553	0	2.02015	0.0197492	0.172101
1.2	1434.35	30.9	61.6356	6.1762	0	1.4002	69.212		3.01097	0.73702	0.451437	0.054045		2.43056	0.541975	0.359416	0.0401565		2.1375	0.450691	0.313471	0.0336012		1.96204	0.398547	0.286152	0.029837		1.58382	0.293075	0.227823	0.0221695		0.06	1.47451	0.708104	0.12		0.3	0.292185	0.0724413	0.008		89.0533	8.9236	0	2.02306	0.0196578	0.171266
1.2	1434.78	31	61.6429	6.0689	0	1.4002	69.112		3.00845	0.735575	0.450511	0.0540103		2.42852	0.540912	0.358679	0.0401307		2.13571	0.449808	0.312828	0.0335797		1.96039	0.397765	0.285565	0.0298179		1.58249	0.292501	0.227356	0.0221552		0.06	1.47342	0.708125	0.12		0.3	0.292097	0.0723483	0.008		89.1928	8.78125	0	2.02599	0.0195665	0.170429
1.2	1435.22	31.1	61.6502	5.96159	0	1.4002	69.012		3.00592	0.734134	0.449588	0.0539756		2.42648	0.539852	0.357943	0.0401049		2.13392	0.448926	0.312187	0.0335581		1.95874	0.396986	0.28498	0.0297987		1.58117	0.291928	0.226889	0.022141		0.06	1.47234	0.708146	0.12		0.3	0.29201	0.0722555	0.008		89.3326	8.63849	0	2.02893	0.0194752	0.16959
1.2	1435.65	31.2	61.6575	5.85429	0	1.4002	68.912		3.0034	0.732696	0.448666	0.053941		2.42445	0.538795	0.35721	0.0400792		2.13213	0.448047	0.311547	0.0335366		1.9571	0.396208	0.284396	0.0297796		1.57984	0.291356	0.226425	0.0221268		0.06	1.47125	0.708168	0.12		0.3	0.291923	0.0721629	0.008		89.4728	8.49532	0	2.03187	0.0193839	0.168748
1.2	1436.09	31.3	61.6648	5.74699	0	1.4002	68.812		3.00088	0.731261	0.447748	0.0539064		2.42242	0.53774	0.356478	0.0400535		2.13034	0.44717	0.310909	0.0335151		1.95546	0.395433	0.283814	0.0297605		1.57852	0.290785	0.225961	0.0221126		0.06	1.47017	0.708189	0.12		0.3	0.291836	0.0720704	0.008		89.6134	8.35173	0	2.03482	0.0192927	0.167903
1.2	1436.52	31.4	61.6721	5.63969	0	1.4002	68.712		2.99837	0.72983	0.446831	0.0538719		2.42039	0.536688	0.355749	0.0400278		2.12855	0.446295	0.310273	0.0334936		1.95382	0.394659	0.283233	0.0297414		1.57719	0.290216	0.225498	0.0220985		0.06	1.46909	0.70821	0.12		0.3	0.291748	0.0719781	0.008		89.7545	8.20772	0	2.03779	0.0192015	0.167056
1.2	1436.96	31.5	61.6794	5.53239	0	1.4002	68.612		2.99586	0.728403	0.445917	0.0538374		2.41836	0.535638	0.355021	0.0400022		2.12677	0.445422	0.309638	0.0334722		1.95218	0.393887	0.282653	0.0297224		1.57587	0.289649	0.225037	0.0220843		0.06	1.468	0.708231	0.12		0.3	0.291661	0.0718859	0.008		89.8959	8.0633	0	2.04076	0.0191103	0.166206
1.2	1437.39	31.6	61.6867	5.42509	0	1.4002	68.512		2.99335	0.726979	0.445005	0.0538029		2.41634	0.534591	0.354295	0.0399766		2.12499	0.444551	0.309005	0.0334507		1.95055	0.393117	0.282075	0.0297034		1.57455	0.289083	0.224577	0.0220702		0.06	1.46692	0.708253	0.12		0.3	0.291574	0.0717939	0.008		90.0378	7.91845	0	2.04373	0.0190192	0.165354
1.2	1437.83	31.7	61.694	5.31778	0	1.4002	68.412		2.99084	0.725559	0.444096	0.0537685		2.41431	0.533547	0.353571	0.039951		2.12321	0.443683	0.308373	0.0334293		1.94892	0.392349	0.281499	0.0296844		1.57324	0.288518	0.224118	0.0220561		0.06	1.46585	0.708274	0.12		0.3	0.291487	0.0717021	0.008		90.1801	7.77318	0	2.04672	0.0189281	0.1645
1.2	1438.26	31.8	61.7013	5.21048	0	1.4002	68.312		2.98834	0.724142	0.443188	0.0537341		2.41229	0.532505	0.352849	0.0399255		2.12144	0.442817	0.307743	0.033408		1.94729	0.391583	0.280924	0.0296654		1.57192	0.287955	0.22366	0.022042		0.06	1.46477	0.708295	0.12		0.3	0.2914	0.0716104	0.008		90.3228	7.62748	0	2.04972	0.018837	0.163642
1.2	1438.7	31.9	61.7086	5.10318	0	1.4002	68.212		2.98584	0.722729	0.442284	0.0536998		2.41028	0.531466	0.352128	0.0399		2.11966	0.441952	0.307115	0.0333866		1.94566	0.390819	0.28035	0.0296464		1.57061	0.287392	0.223203	0.0220279		0.06	1.46369	0.708316	0.12		0.3	0.291314	0.0715189	0.008		90.4659	7.48136	0	2.05272	0.018746	0.162782
1.2	1439.13	32	61.7159	4.99588	0	1.4002	68.112		2.98335	0.721319	0.441381	0.0536655		2.40826	0.530429	0.35141	0.0398745		2.11789	0.44109	0.306488	0.0333653		1.94404	0.390056	0.279778	0.0296275		1.56929	0.286832	0.222748	0.0220138		0.06	1.46262	0.708337	0.12		0.3	0.291227	0.0714276	0.008		90.6095	7.3348	0	2.05574	0.018655	0.16192
1.2	1439.57	32.1	61.7232	4.88858	0	1.4002	68.012		2.98086	0.719913	0.440481	0.0536312		2.40625	0.529395	0.350693	0.039849		2.11613	0.44023	0.305863	0.033344		1.94241	0.389296	0.279207	0.0296086		1.56798	0.286273	0.222294	0.0219997		0.06	1.46155	0.708359	0.12		0.3	0.29114	0.0713364	0.008		90.7534	7.18782	0	2.05876	0.0185641	0.161055
1.2	1440	32.2	61.7305	4.78128	0	1.4002	67.912		2.97837	0.71851	0.439583	0.053597		2.40425	0.528363	0.349978	0.0398236		2.11436	0.439372	0.305239	0.0333227		1.94079	0.388537	0.278638	0.0295897		1.56667	0.285715	0.22184	0.0219857		0.06	1.46047	0.70838	0.12		0.3	0.291054	0.0712454	0.008		90.8978	7.0404	0	2.06179	0.0184732	0.160187
1.2	1440.43	32.3	61.7378	4.67398	0	1.4002	67.812		2.97589	0.71711	0.438687	0.0535628		2.40224	0.527334	0.349265	0.0397982		2.1126	0.438517	0.304617	0.0333014		1.93917	0.387781	0.27807	0.0295708		1.56537	0.285158	0.221388	0.0219717		0.06	1.4594	0.708401	0.12		0.3	0.290967	0.0711545	0.008		91.0426	6.89255	0	2.06483	0.0183823	0.159317
1.2	1440.87	32.4	61.7451	4.56667	0	1.4002	67.712		2.97341	0.715714	0.437794	0.0535286		2.40024	0.526308	0.348553	0.0397728		2.11083	0.437663	0.303997	0.0332802		1.93756	0.387026	0.277504	0.0295519		1.56406	0.284603	0.220937	0.0219577		0.06	1.45833	0.708422	0.12		0.3	0.290881	0.0710639	0.008		91.1879	6.74426	0	2.06788	0.0182914	0.158444
1.2	1441.3	32.5	61.7524	4.45937	0	1.4002	67.612		2.97093	0.714322	0.436902	0.0534945		2.39824	0.525284	0.347844	0.0397475		2.10908	0.436811	0.303378	0.033259		1.93594	0.386273	0.276939	0.0295331		1.56276	0.284049	0.220488	0.0219437		0.06	1.45727	0.708443	0.12		0.3	0.290794	0.0709733	0.008		91.3335	6.59554	0	2.07094	0.0182006	0.157568
1.2	1441.74	32.6	61.7597	4.35207	0	1.4002	67.512		2.96845	0.712932	0.436014	0.0534605		2.39624	0.524262	0.347136	0.0397221		2.10732	0.435962	0.302761	0.0332378		1.93433	0.385521	0.276376	0.0295143		1.56146	0.283497	0.220039	0.0219297		0.06	1.4562	0.708464	0.12		0.3	0.290708	0.070883	0.008		91.4796	6.44637	0	2.07401	0.0181098	0.15669
1.2	1442.17	32.7	61.767	4.24477	0	1.4002	67.412		2.96598	0.711547	0.435127	0.0534264		2.39424	0.523243	0.34643	0.0396969		2.10556	0.435114	0.302145	0.0332167		1.93272	0.384772	0.275814	0.0294955		1.56016	0.282946	0.219592	0.0219157		0.06	1.45514	0.708485	0.12		0.3	0.290622	0.0707928	0.008		91.6262	6.29676	0	2.07708	0.018019	0.155809
1.2	1442.61	32.8	61.7743	4.13747	0	1.4002	67.312		2.96351	0.710164	0.434243	0.0533924		2.39225	0.522226	0.345726	0.0396716		2.10381	0.434269	0.301531	0.0331955		1.93111	0.384024	0.275253	0.0294768		1.55886	0.282396	0.219145	0.0219018		0.06	1.45407	0.708507	0.12		0.3	0.290535	0.0707027	0.008		91.7731	6.1467	0	2.08017	0.0179282	0.154926
1.2	1443.04	32.9	61.7816	4.03017	0	1.4002	67.212		2.96105	0.708785	0.43336	0.0533585		2.39026	0.521212	0.345024	0.0396464		2.10206	0.433426	0.300919	0.0331744		1.9295	0.383279	0.274694	0.029458		1.55756	0.281848	0.2187	0.0218879		0.06	1.45301	0.708528	0.12		0.3	0.290449	0.0706128	0.008		91.9205	5.9962	0	2.08326	0.0178375	0.154039
1.2	1443.48	33	61.7889	3.92286	0	1.4002	67.112		2.95859	0.70741	0.432481	0.0533246		2.38828	0.520201	0.344323	0.0396212		2.10032	0.432584	0.300308	0.0331533		1.9279	0.382535	0.274136	0.0294393		1.55627	0.281301	0.218256	0.021874		0.06	1.45195	0.708549	0.12		0.3	0.290363	0.0705231	0.008		92.0684	5.84525	0	2.08637	0.0177468	0.15315
1.2	1443.91	33.1	61.7962	3.81556	0	1.4002	67.012		2.95613	0.706037	0.431603	0.0532907		2.38629	0.519192	0.343625	0.039596		2.09857	0.431745	0.299698	0.0331323		1.9263	0.381793	0.27358	0.0294206		1.55498	0.280755	0.217813	0.0218601		0.06	1.45089	0.70857	0.12		0.3	0.290277	0.0704336	0.008		92.2167	5.69385	0	2.08948	0.0176562	0.152259
1.2	1444.35	33.2	61.8035	3.70826	0	1.4002	66.912		2.95368	0.704668	0.430727	0.0532568		2.38431	0.518185	0.342928	0.0395709		2.09683	0.430908	0.29909	0.0331112		1.9247	0.381052	0.273025	0.0294019		1.55368	0.280211	0.217371	0.0218462		0.06	1.44983	0.708591	0.12		0.3	0.290191	0.0703441	0.008		92.3654	5.542	0	2.0926	0.0175655	0.151364
1.2	1444.78	33.3	61.8108	3.60096	0	1.4002	66.812		2.95123	0.703303	0.429854	0.0532231		2.38233	0.517181	0.342233	0.0395457		2.09509	0.430073	0.298484	0.0330902		1.9231	0.380314	0.272472	0.0293832		1.5524	0.279668	0.216931	0.0218323		0.06	1.44877	0.708612	0.12		0.3	0.290105	0.0702549	0.008		92.5146	5.38969	0	2.09574	0.0174749	0.150467
1.2	1445.22	33.4	61.8181	3.49366	0	1.4002	66.712		2.94878	0.701941	0.428983	0.0531893		2.38036	0.516179	0.341539	0.0395207		2.09335	0.42924	0.297879	0.0330692		1.92151	0.379577	0.27192	0.0293646		1.55111	0.279126	0.216491	0.0218185		0.06	1.44772	0.708633	0.12		0.3	0.29002	0.0701658	0.008		92.6642	5.23693	0	2.09888	0.0173843	0.149567
1.2	1445.65	33.5	61.8254	3.38636	0	1.4002	66.612		2.94633	0.700582	0.428114	0.0531556		2.37838	0.51518	0.340847	0.0394956		2.09161	0.428409	0.297276	0.0330483		1.91991	0.378843	0.271369	0.029346		1.54982	0.278586	0.216053	0.0218046		0.06	1.44666	0.708654	0.12		0.3	0.289934	0.0700769	0.008		92.8143	5.0837	0	2.10203	0.0172937	0.148664
1.2	1446.09	33.6	61.8327	3.27905	0	1.4002	66.512		2.94389	0.699226	0.427248	0.0531219		2.37641	0.514183	0.340157	0.0394706		2.08988	0.42758	0.296674	0.0330273		1.91832	0.37811	0.270819	0.0293274		1.54854	0.278047	0.215615	0.0217908		0.06	1.44561	0.708675	0.12		0.3	0.289848	0.0699881	0.008		92.9648	4.93002	0	2.10519	0.0172032	0.147759
1.2	1446.52	33.7	61.84	3.17175	0	1.4002	66.412		2.94145	0.697874	0.426383	0.0530882		2.37444	0.513188	0.339469	0.0394456		2.08815	0.426753	0.296074	0.0330064		1.91673	0.377378	0.270272	0.0293088		1.54725	0.277509	0.215179	0.021777		0.06	1.44456	0.708696	0.12		0.3	0.289763	0.0698995	0.008		93.1158	4.77587	0	2.10836	0.0171126	0.14685
1.2	1446.96	33.8	61.8473	3.06445	0	1.4002	66.312		2.93902	0.696525	0.425521	0.0530546		2.37248	0.512196	0.338783	0.0394206		2.08642	0.425928	0.295475	0.0329855		1.91515	0.376649	0.269725	0.0292903		1.54597	0.276972	0.214744	0.0217632		0.06	1.44351	0.708717	0.12		0.3	0.289677	0.069811	0.008		93.2672	4.62126	0	2.11154	0.0170221	0.145939
1.2	1447.39	33.9	61.8546	2.95715	0	1.4002	66.212		2.93659	0.695179	0.424661	0.0530211		2.37051	0.511207	0.338098	0.0393957		2.0847	0.425105	0.294878	0.0329646		1.91356	0.375921	0.26918	0.0292717		1.54469	0.276437	0.21431	0.0217495		0.06	1.44246	0.708738	0.12		0.3	0.289592	0.0697227	0.008		93.4191	4.46619	0	2.11473	0.0169317	0.145025
1.2	1447.83	34	61.8619	2.84985	0	1.4002	66.112		2.93416	0.693837	0.423803	0.0529875		2.36855	0.51022	0.337415	0.0393708		2.08297	0.424285	0.294282	0.0329438		1.91198	0.375195	0.268636	0.0292532		1.54342	0.275903	0.213877	0.0217357		0.06	1.44141	0.708759	0.12		0.3	0.289506	0.0696346	0.008		93.5714	4.31064	0	2.11793	0.0168412	0.144109
1.2	1448.26	34.1	61.8692	2.74255	0	1.4002	66.012		2.93173	0.692497	0.422948	0.052954		2.3666	0.509235	0.336734	0.0393459		2.08125	0.423466	0.293688	0.032923		1.9104	0.374471	0.268094	0.0292347		1.54214	0.275371	0.213445	0.021722		0.06	1.44036	0.70878	0.12		0.3	0.289421	0.0695466	0.008		93.7242	4.15462	0	2.12113	0.0167507	0.143189
1.2	1448.7	34.2	61.8765	2.63524	0	1.4002	65.912		2.92931	0.691162	0.422094	0.0529206		2.36464	0.508253	0.336054	0.039321		2.07953	0.422649	0.293096	0.0329022		1.90882	0.373749	0.267553	0.0292163		1.54087	0.27484	0.213015	0.0217082		0.06	1.43932	0.708801	0.12		0.3	0.289336	0.0694588	0.008		93.8775	3.99813	0	2.12435	0.0166603	0.142266
1.2	1449.13	34.3	61.8838	2.52794	0	1.4002	65.812		2.92689	0.689829	0.421243	0.0528872		2.36269	0.507273	0.335376	0.0392962		2.07781	0.421834	0.292504	0.0328814		1.90725	0.373028	0.267013	0.0291978		1.5396	0.27431	0.212585	0.0216945		0.06	1.43827	0.708822	0.12		0.3	0.289251	0.0693711	0.008		94.0313	3.84116	0	2.12758	0.0165699	0.141341
1.2	1449.57	34.4	61.8911	2.42064	0	1.4002	65.712		2.92448	0.688499	0.420393	0.0528538		2.36074	0.506295	0.3347	0.0392714		2.0761	0.421021	0.291915	0.0328607		1.90567	0.372309	0.266475	0.0291794		1.53832	0.273781	0.212156	0.0216808		0.06	1.43723	0.708843	0.12		0.3	0.289166	0.0692836	0.008		94.1855	3.68371	0	2.13082	0.0164795	0.140413
1.2	1450	34.5	61.8984	2.31334	0	1.4002	65.612		2.92206	0.687173	0.419546	0.0528205		2.35879	0.50532	0.334026	0.0392466		2.07439	0.42021	0.291326	0.0328399		1.9041	0.371592	0.265938	0.029161		1.53706	0.273254	0.211729	0.0216672		0.06	1.43619	0.708864	0.12		0.3	0.289081	0.0691962	0.008		94.3401	3.52579	0	2.13407	0.0163891	0.139482
1.2	1450.43	34.6	61.9057	2.20604	0	1.4002	65.512		2.91965	0.68585	0.418701	0.0527872		2.35685	0.504347	0.333353	0.0392219		2.07268	0.419401	0.29074	0.0328192		1.90253	0.370877	0.265402	0.0291426		1.53579	0.272728	0.211302	0.0216535		0.06	1.43515	0.708885	0.12		0.3	0.288996	0.069109	0.008		94.4953	3.36738	0	2.13732	0.0162988	0.138548
1.2	1450.87	34.7	61.913	2.09874	0	1.4002	65.412		2.91725	0.684531	0.417858	0.0527539		2.3549	0.503376	0.332682	0.0391972		2.07097	0.418594	0.290154	0.0327985		1.90096	0.370163	0.264868	0.0291242		1.53452	0.272203	0.210877	0.0216399		0.06	1.43411	0.708906	0.12		0.3	0.288911	0.0690219	0.008		94.6509	3.20849	0	2.14059	0.0162084	0.137611
1.2	1451.3	34.8	61.9203	1.99144	0	1.4002	65.312		2.91484	0.683214	0.417018	0.0527207		2.35296	0.502408	0.332013	0.0391725		2.06926	0.417789	0.289571	0.0327779		1.8994	0.369451	0.264335	0.0291059		1.53326	0.271679	0.210453	0.0216262		0.06	1.43307	0.708927	0.12		0.3	0.288826	0.068935	0.008		94.807	3.04911	0	2.14387	0.0161181	0.136671
1.2	1451.74	34.9	61.9276	1.88413	0	1.4002	65.212		2.91245	0.681901	0.416179	0.0526875		2.35103	0.501442	0.331345	0.0391478		2.06756	0.416986	0.288988	0.0327572		1.89783	0.368741	0.263803	0.0290876		1.532	0.271157	0.210029	0.0216126		0.06	1.43203	0.708948	0.12		0.3	0.288741	0.0688482	0.008		94.9636	2.88924	0	2.14716	0.0160277	0.135728
1.2	1452.17	35	61.9349	1.77683	0	1.4002	65.112		2.91005	0.68059	0.415343	0.0526543		2.34909	0.500479	0.330679	0.0391232		2.06586	0.416184	0.288407	0.0327366		1.89627	0.368032	0.263273	0.0290693		1.53074	0.270636	0.209607	0.021599		0.06	1.431	0.708968	0.12		0.3	0.288656	0.0687616	0.008		95.1207	2.72889	0	2.15045	0.0159374	0.134782
1.2	1452.61	35.1	61.9422	1.66953	0	1.4002	65.012		2.90766	0.679283	0.414508	0.0526212		2.34716	0.499518	0.330015	0.0390986		2.06416	0.415385	0.287828	0.032716		1.89471	0.367325	0.262744	0.029051		1.52948	0.270116	0.209186	0.0215854		0.06	1.42996	0.708989	0.12		0.3	0.288572	0.0686752	0.008		95.2782	2.56804	0	2.15376	0.0158471	0.133833
1.2	1453.04	35.2	61.9495	1.56223	0	1.4002	64.912		2.90527	0.67798	0.413676	0.0525881		2.34523	0.498559	0.329352	0.039074		2.06246	0.414588	0.28725	0.0326955		1.89315	0.36662	0.262217	0.0290327		1.52822	0.269598	0.208766	0.0215719		0.06	1.42893	0.70901	0.12		0.3	0.288487	0.0685889	0.008		95.4362	2.40669	0	2.15708	0.0157569	0.132881
1.2	1453.48	35.3	61.9568	1.45493	0	1.4002	64.812		2.90288	0.676679	0.412846	0.0525551		2.34331	0.497603	0.328691	0.0390494		2.06077	0.413793	0.286674	0.0326749		1.8916	0.365917	0.26169	0.0290145		1.52696	0.269081	0.208347	0.0215583		0.06	1.4279	0.709031	0.12		0.3	0.288403	0.0685027	0.008		95.5947	2.24484	0	2.16041	0.0156666	0.131927
1.2	1453.91	35.4	61.9641	1.34763	0	1.4002	64.712		2.90049	0.675381	0.412017	0.0525221		2.34138	0.496649	0.328032	0.0390249		2.05907	0.412999	0.286099	0.0326544		1.89004	0.365215	0.261165	0.0289963		1.52571	0.268565	0.207929	0.0215448		0.06	1.42687	0.709052	0.12		0.3	0.288318	0.0684168	0.008		95.7538	2.0825	0	2.16375	0.0155763	0.130969
1.2	1454.35	35.5	61.9714	1.24032	0	1.4002	64.612		2.89811	0.674087	0.411191	0.0524891		2.33946	0.495697	0.327374	0.0390004		2.05738	0.412208	0.285525	0.0326339		1.88849	0.364515	0.260642	0.0289781		1.52446	0.26805	0.207512	0.0215313		0.06	1.42584	0.709073	0.12		0.3	0.288234	0.0683309	0.008		95.9133	1.91965	0	2.16709	0.0154861	0.130008
1.2	1454.78	35.6	61.9788	1.13302	0	1.4002	64.512		2.89574	0.672796	0.410367	0.0524562		2.33754	0.494747	0.326718	0.038976		2.0557	0.411418	0.284953	0.0326135		1.88694	0.363817	0.260119	0.0289599		1.52321	0.267537	0.207097	0.0215178		0.06	1.42481	0.709094	0.12		0.3	0.28815	0.0682452	0.008		96.0732	1.7563	0	2.17045	0.0153958	0.129044
1.2	1455.22	35.7	61.9861	1.02572	0	1.4002	64.412		2.89336	0.671508	0.409545	0.0524233		2.33562	0.4938	0.326063	0.0389515		2.05401	0.41063	0.284382	0.032593		1.8854	0.363121	0.259598	0.0289417		1.52196	0.267024	0.206682	0.0215043		0.06	1.42378	0.709114	0.12		0.3	0.288066	0.0681597	0.008		96.2337	1.59244	0	2.17382	0.0153056	0.128077
1.2	1455.65	35.8	61.9934	0.918419	0	1.4002	64.312		2.89099	0.670223	0.408726	0.0523905		2.33371	0.492855	0.325411	0.0389271		2.05233	0.409845	0.283813	0.0325726		1.88385	0.362426	0.259079	0.0289236		1.52071	0.266513	0.206268	0.0214908		0.06	1.42276	0.709135	0.12		0.3	0.287981	0.0680743	0.008		96.3947	1.42807	0	2.1772	0.0152153	0.127107
1.2	1456.09	35.9	62.0007	0.811118	0	1.4002	64.212		2.88862	0.668941	0.407908	0.0523576		2.3318	0.491912	0.32476	0.0389027		2.05065	0.409061	0.283245	0.0325522		1.88231	0.361733	0.25856	0.0289055		1.51947	0.266004	0.205855	0.0214773		0.06	1.42174	0.709156	0.12		0.3	0.287897	0.067989	0.008		96.5562	1.26319	0	2.18059	0.0151251	0.126134
1.2	1456.52	36	62.008	0.703816	0	1.4002	64.112		2.88626	0.667662	0.407092	0.0523249		2.32989	0.490972	0.32411	0.0388784		2.04897	0.408279	0.282678	0.0325318		1.88077	0.361041	0.258043	0.0288874		1.51822	0.265495	0.205444	0.0214639		0.06	1.42071	0.709177	0.12		0.3	0.287813	0.0679039	0.008		96.7182	1.09779	0	2.184	0.0150349	0.125158
1.2	1456.96	36.1	62.0153	0.596515	0	1.4002	64.012		2.8839	0.666386	0.406278	0.0522921		2.32798	0.490034	0.323462	0.0388541		2.04729	0.407498	0.282113	0.0325114		1.87923	0.360351	0.257527	0.0288693		1.51698	0.264988	0.205033	0.0214504		0.06	1.41969	0.709198	0.12		0.3	0.287729	0.067819	0.008		96.8807	0.93188	0	2.18741	0.0149447	0.124178
1.2	1457.39	36.2	62.0226	0.489213	0	1.4002	63.912		2.88154	0.665114	0.405467	0.0522594		2.32608	0.489098	0.322816	0.0388298		2.04562	0.40672	0.28155	0.0324911		1.87769	0.359663	0.257013	0.0288512		1.51574	0.264482	0.204623	0.021437		0.06	1.41867	0.709218	0.12		0.3	0.287645	0.0677342	0.008		97.0437	0.765448	0	2.19083	0.0148545	0.123196
1.2	1457.83	36.3	62.0299	0.381912	0	1.4002	63.812		2.87918	0.663844	0.404657	0.0522268		2.32418	0.488164	0.322171	0.0388055		2.04394	0.405944	0.280987	0.0324708		1.87616	0.358976	0.2565	0.0288332		1.5145	0.263977	0.204215	0.0214236		0.06	1.41765	0.709239	0.12		0.3	0.287562	0.0676496	0.008		97.2072	0.598495	0	2.19426	0.0147642	0.12221
1.2	1458.26	36.4	62.0372	0.27461	0	1.4002	63.712		2.87683	0.662577	0.403849	0.0521941		2.32228	0.487233	0.321528	0.0387812		2.04227	0.405169	0.280427	0.0324505		1.87462	0.358292	0.255988	0.0288152		1.51326	0.263473	0.203807	0.0214102		0.06	1.41663	0.70926	0.12		0.3	0.287478	0.0675651	0.008		97.3713	0.431018	0	2.19771	0.014674	0.121221
1.2	1458.7	36.5	62.0445	0.167308	0	1.4002	63.612		2.87448	0.661314	0.403044	0.0521615		2.32038	0.486304	0.320887	0.038757		2.04061	0.404397	0.279867	0.0324303		1.87309	0.357608	0.255477	0.0287972		1.51203	0.262971	0.203401	0.0213969		0.06	1.41562	0.709281	0.12		0.3	0.287394	0.0674807	0.008		97.5358	0.263014	0	2.20116	0.0145838	0.120229
1.2	1459.13	36.6	62.0518	0.0600068	0	1.4002	63.512		2.87213	0.660053	0.40224	0.052129		2.31849	0.485377	0.320247	0.0387328		2.03894	0.403626	0.279309	0.03241		1.87156	0.356927	0.254968	0.0287792		1.51079	0.26247	0.202995	0.0213835		0.06	1.4146	0.709301	0.12		0.3	0.287311	0.0673965	0.008		97.7009	0.094481	0	2.20463	0.0144936	0.119234
1.2	1459.57	36.7	62.0591	0	0	1.4002	63.4593		2.86979	0.658796	0.401438	0.0520965		2.3166	0.484452	0.319609	0.0387087		2.03728	0.402857	0.278753	0.0323898		1.87004	0.356247	0.25446	0.0287613		1.50956	0.26197	0.20259	0.0213702		0.06	1.41359	0.709322	0.12		0.3	0.287227	0.0673125	0.008		97.7935	0	0	2.20646	0.0144429	0.118676
1.2	1460	36.8	62.0664	0	0	1.4002	63.4666		2.86745	0.657542	0.400639	0.052064		2.31471	0.48353	0.318972	0.0386845		2.03562	0.40209	0.278197	0.0323696		1.86851	0.355569	0.253953	0.0287433		1.50833	0.261471	0.202187	0.0213569		0.06	1.41258	0.709343	0.12		0.3	0.287144	0.0672285	0.008		97.7938	0	0	2.2062	0.0144421	0.118676
1.2	1460.43	36.9	62.0737	0	0	1.4002	63.4739		2.86511	0.65629	0.399841	0.0520315		2.31282	0.48261	0.318337	0.0386604		2.03396	0.401325	0.277643	0.0323494		1.86699	0.354892	0.253447	0.0287254		1.5071	0.260973	0.201784	0.0213435		0.06	1.41156	0.709364	0.12		0.3	0.28706	0.0671448	0.008		97.794	0	0	2.20595	0.0144414	0.118676
1.2	1460.87	37	62.081	0	0	1.4002	63.4812		2.86278	0.655042	0.399045	0.0519991		2.31094	0.481692	0.317704	0.0386363		2.0323	0.400561	0.277091	0.0323293		1.86547	0.354217	0.252943	0.0287075		1.50587	0.260477	0.201383	0.0213302		0.06	1.41055	0.709384	0.12		0.3	0.286977	0.0670612	0.008		97.7943	0	0	2.2057	0.0144406	0.118677
1.2	1461.3	37.1	62.0883	0	0	1.4002	63.4885		2.86045	0.653797	0.398252	0.0519667		2.30905	0.480776	0.317072	0.0386123		2.03065	0.3998	0.27654	0.0323091		1.86395	0.353543	0.25244	0.0286897		1.50465	0.259982	0.200982	0.021317		0.06	1.40954	0.709405	0.12		0.3	0.286894	0.0669777	0.008		97.7946	0	0	2.20544	0.0144399	0.118677
1.2	1461.74	37.2	62.0956	0	0	1.4002	63.4958		2.85812	0.652554	0.39746	0.0519344		2.30718	0.479862	0.316442	0.0385882		2.02899	0.39904	0.27599	0.032289		1.86243	0.352872	0.251938	0.0286718		1.50342	0.259488	0.200583	0.0213037		0.06	1.40854	0.709426	0.12		0.3	0.28681	0.0668944	0.008		97.7948	0	0	2.20519	0.0144392	0.118677
1.2	1462.17	37.3	62.1029	0	0	1.4002	63.5031		2.8558	0.651315	0.39667	0.0519021		2.3053	0.478951	0.315813	0.0385642		2.02734	0.398282	0.275442	0.032269		1.86092	0.352201	0.251437	0.028654		1.5022	0.258995	0.200184	0.0212905		0.06	1.40753	0.709446	0.12		0.3	0.286727	0.0668112	0.008		97.7951	0	0	2.20494	0.0144384	0.118677
1.2	1462.61	37.4	62.1102	0	0	1.4002	63.5104		2.85347	0.650078	0.395883	0.0518698		2.30342	0.478042	0.315186	0.0385403		2.02569	0.397526	0.274895	0.0322489		1.85941	0.351533	0.250938	0.0286362		1.50098	0.258503	0.199787	0.0212772		0.06	1.40652	0.709467	0.12		0.3	0.286644	0.0667282	0.008		97.7953	0	0	2.20468	0.0144377	0.118677
1.2	1463.04	37.5	62.1175	0	0	1.4002	63.5177		2.85116	0.648845	0.395097	0.0518376		2.30155	0.477135	0.31456	0.0385163		2.02405	0.396772	0.274349	0.0322289		1.85789	0.350866	0.25044	0.0286184		1.49976	0.258013	0.19939	0.021264		0.06	1.40552	0.709488	0.12		0.3	0.286561	0.0666453	0.008		97.7956	0	0	2.20443	0.0144369	0.118677
1.2	1463.48	37.6	62.1248	0	0	1.4002	63.525		2.84884	0.647614	0.394313	0.0518054		2.29968	0.47623	0.313936	0.0384924		2.02241	0.396019	0.273805	0.0322088		1.85639	0.3502	0.249943	0.0286006		1.49854	0.257523	0.198995	0.0212508		0.06	1.40452	0.709508	0.12		0.3	0.286478	0.0665625	0.008		97.7958	0	0	2.20418	0.0144362	0.118677
1.2	1463.91	37.7	62.1321	0	0	1.4002	63.5323		2.84653	0.646387	0.393531	0.0517732		2.29782	0.475327	0.313313	0.0384685		2.02076	0.395269	0.273262	0.0321888		1.85488	0.349537	0.249447	0.0285828		1.49732	0.257035	0.1986	0.0212376		0.06	1.40352	0.709529	0.12		0.3	0.286395	0.0664799	0.008		97.7961	0	0	2.20392	0.0144355	0.118678
1.2	1464.35	37.8	62.1394	0	0	1.4002	63.5396		2.84422	0.645162	0.392751	0.0517411		2.29595	0.474427	0.312693	0.0384446		2.01912	0.39452	0.27272	0.0321689		1.85337	0.348874	0.248953	0.0285651		1.49611	0.256548	0.198206	0.0212244		0.06	1.40251	0.709549	0.12		0.3	0.286312	0.0663975	0.008		97.7963	0	0	2.20367	0.0144347	0.118678
1.2	1464.78	37.9	62.1467	0	0	1.4002	63.5469		2.84191	0.643941	0.391973	0.051709		2.29409	0.473528	0.312073	0.0384208		2.01749	0.393773	0.27218	0.0321489		1.85187	0.348214	0.24846	0.0285474		1.49489	0.256062	0.197814	0.0212113		0.06	1.40152	0.70957	0.12		0.3	0.28623	0.0663152	0.008		97.7966	0	0	2.20342	0.014434	0.118678
1.2	1465.22	38	62.154	0	0	1.4002	63.5542		2.83961	0.642722	0.391197	0.051677		2.29223	0.472632	0.311455	0.038397		2.01585	0.393028	0.271641	0.032129		1.85037	0.347555	0.247968	0.0285297		1.49368	0.255578	0.197422	0.0211981		0.06	1.40052	0.709591	0.12		0.3	0.286147	0.066233	0.008		97.7968	0	0	2.20316	0.0144332	0.118678
1.2	1465.65	38.1	62.1613	0	0	1.4002	63.5615		2.83731	0.641506	0.390423	0.051645		2.29037	0.471738	0.310839	0.0383732		2.01422	0.392284	0.271104	0.0321091		1.84887	0.346897	0.247477	0.028512		1.49247	0.255094	0.197031	0.021185		0.06	1.39952	0.709611	0.12		0.3	0.286064	0.066151	0.008		97.7971	0	0	2.20291	0.0144325	0.118678
1.2	1466.09	38.2	62.1686	0	0	1.4002	63.5688		2.83501	0.640293	0.389651	0.051613		2.28852	0.470846	0.310224	0.0383494		2.01259	0.391542	0.270567	0.0320892		1.84737	0.346241	0.246988	0.0284944		1.49126	0.254612	0.196642	0.0211719		0.06	1.39852	0.709632	0.12		0.3	0.285982	0.0660691	0.008		97.7973	0	0	2.20266	0.0144318	0.118678
1.2	1466.52	38.3	62.1759	0	0	1.4002	63.5761		2.83272	0.639083	0.38888	0.0515811		2.28667	0.469956	0.309611	0.0383257		2.01096	0.390802	0.270032	0.0320694		1.84588	0.345587	0.246499	0.0284767		1.49006	0.254131	0.196253	0.0211588		0.06	1.39753	0.709652	0.12		0.3	0.285899	0.0659873	0.008		97.7976	0	0	2.2024	0.014431	0.118679
1.2	1466.96	38.4	62.1832	0	0	1.4002	63.5834		2.83042	0.637876	0.388112	0.0515492		2.28482	0.469068	0.308999	0.038302		2.00933	0.390064	0.269499	0.0320495		1.84439	0.344934	0.246012	0.0284591		1.48885	0.253651	0.195865	0.0211457		0.06	1.39654	0.709673	0.12		0.3	0.285817	0.0659057	0.008		97.7978	0	0	2.20215	0.0144303	0.118679
1.2	1467.39	38.5	62.1905	0	0	1.4002	63.5907		2.82814	0.636672	0.387345	0.0515173		2.28297	0.468183	0.308389	0.0382783		2.00771	0.389328	0.268967	0.0320297		1.84289	0.344283	0.245526	0.0284415		1.48765	0.253172	0.195478	0.0211326		0.06	1.39554	0.709694	0.12		0.3	0.285734	0.0658243	0.008		97.7981	0	0	2.2019	0.0144295	0.118679
1.2	1467.83	38.6	62.1978	0	0	1.4002	63.598		2.82585	0.63547	0.386581	0.0514854		2.28113	0.467299	0.30778	0.0382547		2.00608	0.388593	0.268436	0.0320099		1.8414	0.343633	0.245042	0.028424		1.48645	0.252694	0.195092	0.0211195		0.06	1.39455	0.709714	0.12		0.3	0.285652	0.065743	0.008		97.7984	0	0	2.20165	0.0144288	0.118679
1.2	1468.26	38.7	62.2051	0	0	1.4002	63.6053		2.82357	0.634272	0.385818	0.0514536		2.27928	0.466418	0.307173	0.038231		2.00446	0.38786	0.267906	0.0319901		1.83992	0.342985	0.244558	0.0284064		1.48525	0.252218	0.194707	0.0211065		0.06	1.39356	0.709735	0.12		0.3	0.28557	0.0656618	0.008		97.7986	0	0	2.20139	0.0144281	0.118679
1.2	1468.7	38.8	62.2124	0	0	1.4002	63.6126		2.82129	0.633076	0.385057	0.0514219		2.27744	0.465539	0.306567	0.0382074		2.00285	0.387129	0.267378	0.0319704		1.83843	0.342339	0.244076	0.0283889		1.48405	0.251742	0.194323	0.0210935		0.06	1.39258	0.709755	0.12		0.3	0.285488	0.0655808	0.008		97.7989	0	0	2.20114	0.0144273	0.118679
1.2	1469.13	38.9	62.2197	0	0	1.4002	63.6199		2.81901	0.631883	0.384298	0.0513902		2.27561	0.464662	0.305963	0.0381839		2.00123	0.3864	0.266851	0.0319507		1.83695	0.341694	0.243595	0.0283713		1.48285	0.251268	0.19394	0.0210805		0.06	1.39159	0.709776	0.12		0.3	0.285406	0.0654999	0.008		97.7991	0	0	2.20089	0.0144266	0.118679
1.2	1469.57	39	62.227	0	0	1.4002	63.6272		2.81674	0.630693	0.383541	0.0513585		2.27377	0.463787	0.30536	0.0381603		1.99962	0.385672	0.266325	0.031931		1.83547	0.34105	0.243115	0.0283538		1.48165	0.250795	0.193558	0.0210675		0.06	1.3906	0.709796	0.12		0.3	0.285324	0.0654191	0.008		97.7994	0	0	2.20064	0.0144259	0.11868
1.2	1470	39.1	62.2343	0	0	1.4002	63.6345		2.81447	0.629506	0.382786	0.0513268		2.27194	0.462914	0.304758	0.0381368		1.998	0.384946	0.2658	0.0319113		1.83399	0.340408	0.242636	0.0283364		1.48046	0.250323	0.193177	0.0210545		0.06	1.38962	0.709817	0.12		0.3	0.285242	0.0653385	0.008		97.7996	0	0	2.20038	0.0144251	0.11868
1.2	1470.43	39.2	62.2416	0	0	1.4002	63.6418		2.8122	0.628322	0.382032	0.0512952		2.27011	0.462043	0.304159	0.0381133		1.99639	0.384222	0.265277	0.0318916		1.83251	0.339768	0.242159	0.0283189		1.47927	0.249852	0.192797	0.0210415		0.06	1.38863	0.709837	0.12		0.3	0.28516	0.065258	0.008		97.7999	0	0	2.20013	0.0144244	0.11868
1.2	1470.87	39.3	62.2489	0	0	1.4002	63.6491		2.80994	0.62714	0.381281	0.0512636		2.26828	0.461174	0.30356	0.0380898		1.99479	0.383499	0.264756	0.031872		1.83103	0.339129	0.241682	0.0283015		1.47807	0.249382	0.192418	0.0210285		0.06	1.38765	0.709858	0.12		0.3	0.285078	0.0651777	0.008		97.8001	0	0	2.19988	0.0144236	0.11868
1.2	1471.3	39.4	62.2562	0	0	1.4002	63.6564		2.80767	0.625962	0.380531	0.051232		2.26645	0.460307	0.302963	0.0380664		1.99318	0.382779	0.264235	0.0318524		1.82956	0.338491	0.241207	0.0282841		1.47689	0.248913	0.192039	0.0210156		0.06	1.38667	0.709878	0.12		0.3	0.284996	0.0650975	0.008		97.8004	0	0	2.19963	0.0144229	0.11868
1.2	1471.74	39.5	62.2635	0	0	1.4002	63.6637		2.80542	0.624786	0.379783	0.0512005		2.26463	0.459442	0.302368	0.038043		1.99158	0.38206	0.263716	0.0318328		1.82809	0.337856	0.240733	0.0282667		1.4757	0.248445	0.191662	0.0210027		0.06	1.38569	0.709898	0.12		0.3	0.284914	0.0650174	0.008		97.8006	0	0	2.19937	0.0144222	0.11868
1.2	1472.17	39.6	62.2708	0	0	1.4002	63.671		2.80316	0.623613	0.379037	0.051169		2.26281	0.45858	0.301774	0.0380196		1.98998	0.381342	0.263198	0.0318132		1.82662	0.337221	0.24026	0.0282493		1.47451	0.247979	0.191286	0.0209898		0.06	1.38471	0.709919	0.12		0.3	0.284833	0.0649375	0.008		97.8009	0	0	2.19912	0.0144214	0.118681
1.2	1472.61	39.7	62.2781	0	0	1.4002	63.6783		2.80091	0.622442	0.378293	0.0511376		2.26099	0.457719	0.301182	0.0379962		1.98838	0.380627	0.262681	0.0317936		1.82515	0.336588	0.239789	0.0282319		1.47333	0.247514	0.19091	0.0209769		0.06	1.38373	0.709939	0.12		0.3	0.284751	0.0648577	0.008		97.8011	0	0	2.19887	0.0144207	0.118681
1.2	1473.04	39.8	62.2854	0	0	1.4002	63.6856		2.79866	0.621275	0.377551	0.0511062		2.25917	0.456861	0.300591	0.0379729		1.98678	0.379913	0.262166	0.0317741		1.82368	0.335957	0.239318	0.0282146		1.47214	0.247049	0.190535	0.020964		0.06	1.38276	0.70996	0.12		0.3	0.284669	0.0647781	0.008		97.8014	0	0	2.19862	0.01442	0.118681
1.2	1473.48	39.9	62.2927	0	0	1.4002	63.6929		2.79641	0.62011	0.37681	0.0510748		2.25736	0.456004	0.300001	0.0379496		1.98518	0.3792	0.261651	0.0317546		1.82222	0.335327	0.238849	0.0281973		1.47096	0.246586	0.190162	0.0209511		0.06	1.38178	0.70998	0.12		0.3	0.284588	0.0646986	0.008		97.8016	0	0	2.19836	0.0144192	0.118681
1.2	1473.91	40	62.3	0	0	1.4002	63.7002		2.79417	0.618948	0.376072	0.0510435		2.25555	0.45515	0.299413	0.0379263		1.98359	0.37849	0.261138	0.0317351		1.82076	0.334699	0.238381	0.0281799		1.46978	0.246124	0.189789	0.0209382		0.06	1.38081	0.710001	0.12		0.3	0.284507	0.0646192	0.008		97.8019	0	0	2.19811	0.0144185	0.118681
References:
Workman, R. K. & Hart, S. R. Major and trace element composition of the depleted MORB mantle (DMM). Earth and Planetary Science Letters 231, 53–72 (2005).
Salters, V. J. M. & Stracke, A. Composition of the depleted mantle. Geochemistry, Geophysics, Geosystems 5, (2004).
Falloon, T. J., Green, D. H., Danyushevsky, L. V. & McNeill, A. W. The Composition of Near-solidus Partial Melts of Fertile Peridotite at 1 and 1·5 GPa: Implications for the Petrogenesis of MORB. Journal of Petrology 49, 591–613 (2008).
Gaetani, G. A., & Grove, T. L. The influence of water on melting of mantle peridotite. Contributions to Mineralogy and Petrology 131, 323-346 (1998).
Wang, J. et al. Oxidation State of Arc Mantle Revealed by Partitioning of V, Sc, and Ti Between Mantle Minerals and Basaltic Melts. J. Geophys. Res. Solid Earth 124, 4617–4638 (2019).
[truncated: 25 more columns]
