# Supplementary material for: Latitude-dependent oxygen fugacity in arc magmas
Source: Nat Commun. 2024 Jul 18;15:6050. doi: 10.1038/s41467-024-50337-6 (PMC11258285; doi:10.1038/s41467-024-50337-6)
Supplement: Supplementary file 12 — Supplementary Data 9 [file 41467_2024_50337_MOESM12_ESM.xlsx]

## Sheet: Sheet1
Supplementary Table 9. Model for Cu and Zr variations during sub-arc mantle melting.
mantle melting condition				Mineral modes and melting reaction of the mantle							Dmineral/melt for Cu and Zr											S in the mantle sulfides				S, Cu, and Zr in the mantle
fO2(FMQ)					Ol	Opx	Cpx	Sp	Reference		phase	Ol		Opx		Cpx		Sp		Bulk D		composition	S in sulfide(ppm)	S in sulfide(wt%)	Reference	Co (ppm)	Average	uncertainty		Reference
0				spinel lherzolite(DMM)	0.57	0.28	0.13	0.02	Workman and Hart (2005)			D	Reference	D	Reference	D	Reference	D	Reference			(Fe,Ni,Cu)S	369000	36.9	Jugo et al. (2005)	S	400	300		estimated
				melting reaction for lherzolite	0.25	-0.51	-0.62	-0.12	Gaetani and Grove (1998)		Zr	0.007	Kelemen (1990)	0.027	McDade et al (2003)	0.103	McDade et al (2003)	0.06	Horn (1994)	Zr	0.02614					Cu	30.75			Salters and Stracke. (2004); Plank and Langmuir (1998)
				melting reaction for harzburgite	-0.19	-0.81			Parman and Grove (2004)		Cu	0.047	Li et al. (2022)	0.0279	Li et al. (2022)	0.0601	Li et al. (2022)	0.15	Li et al. (2022)	Cu	0.045415					Zr	6.331	6.776	5.526	Workman and Hart (2005); Plank and Langmuir (1998)
		Mineral modes (without sulfide)					Mineral modes (with sulfide)									Bulk D			Peridotite residue				instantaneous melt				Aggregated melt
F	Mass of residue	Ol	Opx	Cpx	Sp		Ol	Opx	Cpx	Sp	sulfide		SCSS	DCusulfide/melt		Cu	Zr		S	Cu	Zr		S	Cu	Zr		S	Cu	Zr	Cu/Zr
0	1	0.57	0.28	0.13	0.02		0.569382	0.279696	0.129859	0.0199783	0.00108401		1474.62	625	294.924	0.722873	0.0261117		400	30.75	6.331		1474.62
0.01	0.99	0.5725	0.2749	0.1238	0.0188		0.577673	0.277384	0.124919	0.0189699	0.00105459		1474.62	625		0.704364	0.0255379		389.145	30.6326	4.61117		1474.62	42.3762	176.594		1474.62	42.3762	176.594	0.239963
0.02	0.98	0.575	0.2698	0.1176	0.0176		0.586134	0.275024	0.119877	0.0179408	0.00102458		1474.62	625		0.685478	0.0249524		378.069	30.5032	3.32462		1474.62	43.3079	130.693		1474.62	42.842	153.644	0.27884
0.03	0.97	0.5775	0.2647	0.1114	0.0164		0.594769	0.272615	0.114731	0.0168904	0.000993941		1474.62	625		0.666202	0.0243547		366.764	30.361	2.37124		1474.62	44.296	95.8026		1474.62	43.3267	134.363	0.322459
0.04	0.96	0.58	0.2596	0.1052	0.0152		0.603585	0.270156	0.109478	0.0158181	0.000962667		1474.62	625		0.646525	0.0237446		355.224	30.2049	1.67183		1474.62	45.3461	69.5151		1474.62	43.8315	118.151	0.370978
0.05	0.95	0.5825	0.2545	0.099	0.014		0.612587	0.267645	0.104114	0.0147231	0.000930734		1474.62	625		0.626434	0.0231216		343.441	30.0338	1.16422		1474.62	46.4649	49.8946		1474.62	44.3582	104.5	0.424481
0.06	0.94	0.585	0.2494	0.0928	0.0128		0.621781	0.265081	0.0986347	0.0136048	0.000898122		1474.62	625		0.605915	0.0224853		331.407	29.8463	0.800041		1474.62	47.6599	35.3969		1474.62	44.9085	92.9827	0.482977
0.07	0.93	0.5875	0.2443	0.0866	0.0116		0.631174	0.262461	0.0930378	0.0124623	0.000864809		1474.62	625		0.584954	0.0218353		319.115	29.641	0.541983		1474.62	48.9399	24.7994		1474.62	45.4844	83.2422	0.54641
0.08	0.92	0.59	0.2392	0.0804	0.0104		0.640772	0.259784	0.0873187	0.011295	0.000830772		1474.62	625		0.563539	0.0211711		306.555	29.4162	0.361546		1474.62	50.3153	17.1422		1474.62	46.0882	74.9797	0.614676
0.09	0.91	0.5925	0.2341	0.0742	0.0092		0.650581	0.257048	0.0814736	0.0101018	0.000795986		1474.62	625		0.541652	0.0204922		293.719	29.1703	0.237189		1474.62	51.798	11.6781		1474.62	46.7227	67.9462	0.687642
0.1	0.9	0.595	0.229	0.068	0.008		0.660608	0.254251	0.0754981	0.00888213	0.000760427		1474.62	625		0.519279	0.0197983		280.598	28.901	0.15281		1474.62	53.4024	7.83129		1474.62	47.3906	61.9347	0.765171
0.11	0.89	0.5975	0.2239	0.0618	0.0068		0.670862	0.251391	0.0693879	0.00763492	0.00072407		1474.62	625		0.496403	0.0190886		267.182	28.6062	0.0965218		1474.62	55.1456	5.16244		1474.62	48.0956	56.7736	0.847148
0.12	0.88	0.6	0.2188	0.0556	0.0056		0.68135	0.248466	0.0631384	0.00635927	0.000686886		1474.62	625		0.473008	0.0183628		253.461	28.283	0.0596628		1474.62	57.0481	3.34011		1474.62	48.8417	52.3208	0.933504
0.13	0.87	0.6025	0.2137	0.0494	0.0044		0.692079	0.245473	0.0567448	0.00505419	0.000648847		1474.62	625		0.449074	0.0176203		239.424	27.9283	0.0360122		1474.62	59.135	2.11726		1474.62	49.6335	48.459	1.02424
0.14	0.86	0.605	0.2086	0.0432	0.0032		0.703059	0.24241	0.0502019	0.00371866	0.000609923		1474.62	625		0.424584	0.0168604		225.062	27.5387	0.0211728		1474.62	61.4372	1.3122		1474.62	50.4766	45.0914	1.11943
0.15	0.85	0.6075	0.2035	0.037	0.002		0.714298	0.239275	0.0435046	0.0023516	0.000570084		1474.62	625		0.399518	0.0160826		210.361	27.1098	0.0120897		1474.62	63.9931	0.793232		1474.62	51.3777	42.1382	1.21927
0.16	0.84	0.61	0.1984	0.0308	0.0008		0.725806	0.236065	0.0366473	0.000951877	0.000529296		1474.62	625		0.373854	0.0152862		195.31	26.6367	0.00668136		1474.62	66.8516	0.466393		1474.62	52.3448	39.5337	1.32406
0.17	0.83	0.6125	0.1933	0.0246	0		0.737237	0.232666	0.0296098	0	0.000487525		1474.62	625		0.347624	0.0144924		179.897	26.1133	0.00355901		1474.62	70.0752	0.265837		1474.62	53.3878	37.2238	1.43424
0.18	0.82	0.615	0.1882	0.0184	0		0.748207	0.228963	0.0223854	0	0.000444736		1474.62	625		0.320859	0.0137251		164.108	25.5326	0.00181978		1474.62	73.7356	0.146175		1474.62	54.5182	35.1639	1.5504
0.19	0.81	0.6175	0.1831	0.0122	0		0.759415	0.22518	0.0150038	0	0.00040089		1474.62	625		0.293433	0.0129412		147.928	24.8858	0.000889793		1474.62	77.9263	0.0771491		1474.62	55.7502	33.3173	1.67331
0.2	0.8	0.62	0.178	0.006	0		0.77087	0.221314	0.00746003	0	0.000355948		1474.62	625		0.265321	0.01214		131.345	24.1616	0.000413342		1474.62	82.8148	0.0390059		1474.62	57.1034	31.6533	1.80403
0.21	0.79	0.6225	0.1729	0	0		0.782383	0.217308	0	0	0.000309868		1474.62	625		0.236502	0.011344		114.341	23.3458	0.000180948		1474.62	88.6119	0.0187724		1474.62	58.6039	30.1469	1.94394
0.22	0.78	0.625	0.1678	0	0		0.788138	0.211599	0	0	0.000262606		1474.62	625		0.207075	0.0112301		96.9018	22.4191	7.39987e-05		1474.62	95.6258	0.00852302		1474.62	60.2867	28.777	2.09496
0.23	0.77	0.6275	0.1627	0	0		0.793933	0.205853	0	0	0.000214117		1474.62	625		0.176881	0.0111156		79.0093	21.3561	2.94521e-05		1474.62	104.273	0.00350408		1474.62	62.1991	27.526	2.25965
0.24	0.76	0.63	0.1576	0	0		0.799767	0.200069	0	0	0.000164352		1474.62	625		0.145891	0.0110002		60.646	20.1191	1.13898e-05		1474.62	115.368	0.00140219		1474.62	64.4145	26.3791	2.44187
0.25	0.75	0.6325	0.1525	0	0		0.805641	0.194246	0	0	0.00011326		1474.62	625		0.114072	0.0108841		41.793	18.6503	4.27205e-06		1474.62	130.278	0.000545222		1474.62	67.049	25.324	2.64765
0.26	0.74	0.635	0.1474	0	0		0.811556	0.188383	0	0	6.07871e-05		1474.62	625		0.081391	0.0107672		22.4305	16.8522	1.55098e-06		1474.62	151.713	0.000205631		1474.62	70.3053	24.35	2.88728
0.27	0.73	0.6375	0.1423	0	0		0.817512	0.182481	0	0	6.8765e-06		1474.62	625		0.0478121	0.0106496		2.53743	14.5344	5.43825e-07		1474.62	186.053	7.50731e-05		1474.62	74.5923	23.4481	3.18116
0.28	0.72	0.64	0.1372	0	0		0.823469	0.176531	0	0	0		1474.62	625		0.0436283	0.0105306		0	11.2153	1.83706e-07		1474.62	253.503	2.64724e-05		1474.62	80.982	22.6107	3.58158
0.29	0.71	0.6425	0.1321	0	0		0.82946	0.17054	0	0	0		1474.62	625		0.0437427	0.0104108		0	8.40363	5.96168e-08		1474.62	210.846	8.99402e-06		1423.77	85.4601	21.831	3.91461
0.3	0.7	0.645	0.127	0	0		0.835492	0.164508	0	0	0		1474.62	625		0.0438579	0.0102902		0	6.27153	1.85282e-08		1474.62	157.651	2.93582e-06		1376.31	87.8664	21.1033	4.16363
0.31	0.69	0.6475	0.1219	0	0		0.841565	0.158435	0	0	0		1474.62	625		0.0439739	0.0101687		0	4.66094	5.49502e-09		1474.62	117.402	9.17815e-07		1331.92	88.8192	20.4226	4.34907
0.32	0.68	0.65	0.1168	0	0		0.847679	0.152321	0	0	0		1474.62	625		0.0440907	0.0100464		0	3.44912	1.54887e-09		1474.62	87.0648	2.73833e-07		1290.29	88.7644	19.7844	4.48659
0.33	0.67	0.6525	0.1117	0	0		0.853834	0.146166	0	0	0		1474.62	625		0.0442082	0.00992332		0	2.54105	4.12982e-10		1474.62	64.2896	7.76531e-08		1251.19	88.0227	19.1848	4.58814
0.34	0.66	0.655	0.1066	0	0		0.860032	0.139968	0	0	0		1474.62	625		0.0443266	0.00979937		0	1.86348	1.03598e-10		1474.62	47.2612	2.08323e-08		1214.39	86.8238	18.6206	4.66279
0.35	0.65	0.6575	0.1015	0	0		0.866271	0.133729	0	0	0		1474.62	625		0.0444458	0.00967457		0	1.36009	2.42931e-11		1474.62	34.5835	5.25841e-09		1179.7	85.3313	18.0886	4.71741
0.36	0.64	0.66	0.0964	0	0		0.872554	0.127446	0	0	0		1474.62	625		0.0445658	0.00954892		0	0.987807	5.28443e-12		1474.62	25.1862	1.24085e-09		1146.93	83.6606	17.5861	4.7572
0.37	0.63	0.6625	0.0913	0	0		0.87888	0.12112	0	0	0		1474.62	625		0.0446866	0.00942239		0	0.71377	1.05648e-12		1474.62	18.2521	2.71645e-10		1115.93	81.8928	17.1108	4.78603
0.38	0.62	0.665	0.0862	0	0		0.88525	0.11475	0	0	0		1474.62	625		0.0448083	0.00929499		0	0.513032	1.91906e-13		1474.62	13.1595	5.46602e-11		1086.56	80.084	16.6605	4.80681
0.39	0.61	0.6675	0.0811	0	0		0.891664	0.108336	0	0	0		1474.62	625		0.0449308	0.00916671		0	0.366727	3.12152e-14		1474.62	9.43764	9.99402e-12		1058.7	78.2726	16.2333	4.82172
0.4	0.6	0.67	0.076	0	0		0.898123	0.101877	0	0	0		1474.62	625		0.0450542	0.00903753		0	0.260652	4.46142e-15		1474.62	6.73122	1.63644e-12		1032.23	76.484	15.8275	4.83235
0.41	0.59	0.6725	0.0709	0	0		0.904627	0.0953726	0	0	0		1474.62	625		0.0451784	0.00890745		0	0.184162	5.46081e-16		1474.62	4.77353	2.35467e-13		1007.06	74.735	15.4415	4.83989
0.42	0.58	0.675	0.0658	0	0		0.911177	0.0888229	0	0	0		1474.62	625		0.0453035	0.00877646		0	0.129318	5.51773e-17		1474.62	3.36514	2.90185e-14		983.081	73.0357	15.0738	4.84521
0.43	0.57	0.6775	0.0607	0	0		0.917773	0.082227	0	0	0		1474.62	625		0.0454295	0.00864454		0	0.0902246	4.34808e-18		1474.62	2.35765	2.95244e-15		960.218	71.392	14.7233	4.84893
0.44	0.56	0.68	0.0556	0	0		0.924415	0.0755846	0	0	0		1474.62	625		0.0455563	0.00851169		0	0.0625288	2.41874e-19		1474.62	1.64119	2.34296e-16		938.395	69.8068	14.3886	4.85152
0.45	0.55	0.6825	0.0505	0	0		0.931105	0.068895	0	0	0		1474.62	625		0.0456841	0.0083779		0	0.0430328	7.61048e-21		1474.62	1.13481	1.31264e-17		917.542	68.2807	14.0689	4.85331
0.46	0.54	0.685	0.0454	0	0		0.937842	0.0621577	0	0	0		1474.62	625		0.0458128	0.00824315		0	0.0294002	4.75835e-23		1474.62	0.779195	4.16007e-19		897.595	66.8133	13.763	4.85454
0.47	0.53	0.6875	0.0403	0	0		0.944628	0.0553724	0	0	0		1474.62	625		0.0459424	0.00810745		0	0.0199337	0		1474.62	0.531124	2.62013e-21		878.498	65.4031	13.4702	4.85538
0.48	0.52	0.69	0.0352	0	0		0.951462	0.0485383	0	0	0		1474.62	625		0.0460729	0.00797077		0	0.0134079	0		1474.62	0.359276	0		860.196	64.048	13.1896	4.85595
0.49	0.51	0.6925	0.0301	0	0		0.958345	0.0416551	0	0	0		1474.62	625		0.0462044	0.0078331		0	0.00894341	0		1474.62	0.241096	0		842.641	62.7458	12.9204	4.85633
0.5	0.5	0.695	0.025	0	0		0.965278	0.0347222	0	0	0		1474.62	625		0.0463368	0.00769444		0	0.00591344	0		1474.62	0.160442	0		825.788	61.4941	12.662	4.85659
0.51	0.49	0.6975	0.0199	0	0		0.972261	0.0277391	0	0	0		1474.62	625		0.0464702	0.00755478		0	0.0038742	0		1474.62	0.105836	0		809.596	60.2904	12.4137	4.85675
0.52	0.48	0.7	0.0148	0	0		0.979295	0.0207051	0	0	0		1474.62	625		0.0466045	0.0074141		0	0.00251376	0		1474.62	0.0691753	0		794.027	59.1323	12.175	4.85686
0.53	0.47	0.7025	0.0097	0	0		0.98638	0.0136198	0	0	0		1474.62	625		0.0467399	0.0072724		0	0.00161452	0		1474.62	0.0447778	0		779.045	58.0174	11.9453	4.85693
0.54	0.46	0.705	0.0046	0	0		0.993517	0.00648253	0	0	0		1474.62	625		0.0468762	0.00712965		0	0.0010259	0		1474.62	0.0286912	0		764.618	56.9436	11.7241	4.85698
0.55	0.45	0.7075	0	0	0		1	0	0	0	0		1474.62	625		0.047	0.007		0	0.000644535	0		1474.62	0.0181873	0		750.716	55.9086	11.5109	4.85701
0.56	0.44	0.71	0	0	0		1	0	0	0	0		1474.62	625		0.047	0.007		0	0.000400055	0		1474.62	0.0114016	0		737.311	54.9104	11.3054	4.85702
0.57	0.43	0.7125	0	0	0		1	0	0	0	0		1474.62	625		0.047	0.007		0	0.00024478	0		1474.62	0.00707686	0		724.375	53.9472	11.107	4.85704
0.58	0.42	0.715	0	0	0		1	0	0	0	0		1474.62	625		0.047	0.007		0	0.000147511	0		1474.62	0.0043301	0		711.886	53.0171	10.9155	4.85704
0.59	0.41	0.7175	0	0	0		1	0	0	0	0		1474.62	625		0.047	0.007		0	8.74642e-05	0		1474.62	0.00260943	0		699.82	52.1186	10.7305	4.85705
0.6	0.4	0.72	0	0	0		1	0	0	0	0		1474.62	625		0.047	0.007		0	5.09704e-05	0		1474.62	0.00154722	0		688.156	51.25	10.5517	4.85705
0.61	0.39	0.7225	0	0	0		1	0	0	0	0		1474.62	625		0.047	0.007		0	2.9158e-05	0		1474.62	0.000901652	0		676.875	50.4098	10.3787	4.85705
0.62	0.38	0.725	0	0	0		1	0	0	0	0		1474.62	625		0.047	0.007		0	1.63517e-05	0		1474.62	0.000515798	0		665.958	49.5968	10.2113	4.85705
0.63	0.37	0.7275	0	0	0		1	0	0	0	0		1474.62	625		0.047	0.007		0	8.9759e-06	0		1474.62	0.000289258	0		655.387	48.8095	10.0492	4.85705
0.64	0.36	0.73	0	0	0		1	0	0	0	0		1474.62	625		0.047	0.007		0	4.81464e-06	0		1474.62	0.000158781	0		645.147	48.0469	9.89219	4.85705
0.65	0.35	0.7325	0	0	0		1	0	0	0	0		1474.62	625		0.047	0.007		0	2.51878e-06	0		1474.62	8.51697e-05	0		635.221	47.3077	9.74	4.85705
0.66	0.34	0.735	0	0	0		1	0	0	0	0		1474.62	625		0.047	0.007		0	1.28238e-06	0		1474.62	4.45566e-05	0		625.597	46.5909	9.59242	4.85705
0.67	0.33	0.7375	0	0	0		1	0	0	0	0		1474.62	625		0.047	0.007		0	6.33816e-07	0		1474.62	2.26849e-05	0		616.26	45.8955	9.44925	4.85705
0.68	0.32	0.74	0	0	0		1	0	0	0	0		1474.62	625		0.047	0.007		0	3.03247e-07	0		1474.62	1.1212e-05	0		607.197	45.2206	9.31029	4.85705
0.69	0.31	0.7425	0	0	0		1	0	0	0	0		1474.62	625		0.047	0.007		0	1.39985e-07	0		1474.62	5.36435e-06	0		598.397	44.5652	9.17536	4.85705
0.7	0.3	0.745	0	0	0		1	0	0	0	0		1474.62	625		0.047	0.007		0	6.21082e-08	0		1474.62	2.4763e-06	0		589.848	43.9286	9.04429	4.85705
0.71	0.29	0.7475	0	0	0		1	0	0	0	0		1474.62	625		0.047	0.007		0	2.63644e-08	0		1474.62	1.09868e-06	0		581.541	43.3099	8.9169	4.85705
0.72	0.28	0.75	0	0	0		1	0	0	0	0		1474.62	625		0.047	0.007		0	1.06496e-08	0		1474.62	4.6638e-07	0		573.464	42.7083	8.79306	4.85705
0.73	0.27	0.7525	0	0	0		1	0	0	0	0		1474.62	625		0.047	0.007		0	4.06668e-09	0		1474.62	1.88389e-07	0		565.608	42.1233	8.6726	4.85705
0.74	0.26	0.755	0	0	0		1	0	0	0	0		1474.62	625		0.047	0.007		0	1.45623e-09	0		1474.62	7.19385e-08	0		557.965	41.5541	8.55541	4.85705
0.75	0.25	0.7575	0	0	0		1	0	0	0	0		1474.62	625		0.047	0.007		0	4.84067e-10	0		1474.62	2.57603e-08	0		550.525	41	8.44133	4.85705
0.76	0.24	0.76	0	0	0		1	0	0	0	0		1474.62	625		0.047	0.007		0	1.47444e-10	0		1474.62	8.56301e-09	0		543.281	40.4605	8.33026	4.85705
0.77	0.23	0.7625	0	0	0		1	0	0	0	0		1474.62	625		0.047	0.007		0	4.04528e-11	0		1474.62	2.60825e-09	0		536.226	39.9351	8.22208	4.85705
0.78	0.22	0.765	0	0	0		1	0	0	0	0		1474.62	625		0.047	0.007		0	9.76434e-12	0		1474.62	7.15599e-10	0		529.351	39.4231	8.11667	4.85705
0.79	0.21	0.7675	0	0	0		1	0	0	0	0		1474.62	625		0.047	0.007		0	2.00414e-12	0		1474.62	1.72729e-10	0		522.65	38.9241	8.01392	4.85705
0.8	0.2	0.77	0	0	0		1	0	0	0	0		1474.62	625		0.047	0.007		0	3.31714e-13	0		1474.62	3.54528e-11	0		516.117	38.4375	7.91375	4.85705
0.81	0.19	0.7725	0	0	0		1	0	0	0	0		1474.62	625		0.047	0.007		0	4.03343e-14	0		1474.62	5.86792e-12	0		509.746	37.963	7.81605	4.85705
0.82	0.18	0.775	0	0	0		1	0	0	0	0		1474.62	625		0.047	0.007		0	2.93606e-15	0		1474.62	7.13502e-13	0		503.529	37.5	7.72073	4.85705
0.83	0.17	0.7775	0	0	0		1	0	0	0	0		1474.62	625		0.047	0.007		0	5.35879e-17	0		1474.62	5.19381e-14	0		497.463	37.0482	7.62771	4.85705
0.84	0.16	0.78	0	0	0		1	0	0	0	0		1474.62	625		0.047	0.007		0	-2.31005e-18	0		1474.62	9.47955e-16	0		491.54	36.6071	7.5369	4.85705
0.85	0.15	0.7825	0	0	0		1	0	0	0	0		1474.62	625		0.047	0.007		0	2.60223e-19	0		1474.62	-4.08641e-17	0		485.758	36.1765	7.44824	4.85705
0.86	0.14	0.785	0	0	0		1	0	0	0	0		1474.62	625		0.047	0.007		0	-4.99947e-20	0		1474.62	4.60326e-18	0		480.109	35.7558	7.36163	4.85705
0.87	0.13	0.7875	0	0	0		1	0	0	0	0		1474.62	625		0.047	0.007		0	1.41897e-20	0		1474.62	-8.84393e-19	0		474.591	35.3448	7.27701	4.85705
0.88	0.12	0.79	0	0	0		1	0	0	0	0		1474.62	625		0.047	0.007		0	-5.5455e-21	0		1474.62	2.51013e-19	0		469.198	34.9432	7.19432	4.85705
0.89	0.11	0.7925	0	0	0		1	0	0	0	0		1474.62	625		0.047	0.007		0	2.86839e-21	0		1474.62	-9.80983e-20	0		463.926	34.5506	7.11348	4.85705
0.9	0.1	0.795	0	0	0		1	0	0	0	0		1474.62	625		0.047	0.007		0	-1.91888e-21	0		1474.62	5.07411e-20	0		458.771	34.1667	7.03444	4.85705
0.91	0.09	0.7975	0	0	0		1	0	0	0	0		1474.62	625		0.047	0.007		0	1.63951e-21	0		1474.62	-3.39444e-20	0		453.73	33.7912	6.95714	4.85705
0.92	0.08	0.8	0	0	0		1	0	0	0	0		1474.62	625		0.047	0.007		0	-1.78087e-21	0		1474.62	2.90025e-20	0		448.798	33.4239	6.88152	4.85705
0.93	0.07	0.8025	0	0	0		1	0	0	0	0		1474.62	625		0.047	0.007		0	2.46516e-21	0		1474.62	-3.1503e-20	0		443.972	33.0645	6.80753	4.85705
0.94	0.06	0.805	0	0	0		1	0	0	0	0		1474.62	625		0.047	0.007		0	-4.39197e-21	0		1474.62	4.36079e-20	0		439.249	32.7128	6.73511	4.85705
0.95	0.05	0.8075	0	0	0		1	0	0	0	0		1474.62	625		0.047	0.007		0	1.02682e-20	0		1474.62	-7.76927e-20	0		434.625	32.3684	6.66421	4.85705
0.96	0.04	0.81	0	0	0		1	0	0	0	0		1474.62	625		0.047	0.007		0	-3.25751e-20	0		1474.62	1.81641e-19	0		430.098	32.0313	6.59479	4.85705
0.97	0.03	0.8125	0	0	0		1	0	0	0	0		1474.62	625		0.047	0.007		0	1.48648e-19	0		1474.62	-5.76245e-19	0		425.664	31.701	6.5268	4.85705
0.98	0.02	0.815	0	0	0		1	0	0	0	0		1474.62	625		0.047	0.007		0	-1.0918e-18	0		1474.62	2.62954e-18	0		421.32	31.3776	6.4602	4.85705
0.99	0.01	0.8175	0	0	0		1	0	0	0	0		1474.62	625		0.047	0.007		0	1.713e-17	0		1474.62	-1.93136e-17	0		417.065	31.0606	6.39495	4.85705
mantle melting condition				Mineral modes and melting reaction of the mantle							Dmineral/melt for Cu and Zr											S in the mantle sulfides				S, Cu, and Zr in the mantle
fO2(FMQ)					Ol	Opx	Cpx	Sp	Reference		phase	Ol		Opx		Cpx		Sp		Bulk D		composition	S in sulfide(ppm)	S in sulfide(wt%)	Reference	Co (ppm)	Average	uncertainty		Reference
1				spinel lherzolite(DMM)	0.57	0.28	0.13	0.02	Workman and Hart (2005)			D	Reference	D	Reference	D	Reference	D	Reference			(Fe,Ni,Cu)S	369000	36.9	Jugo et al. (2005)	S	400	300		estimated
				melting reaction for lherzolite	0.25	-0.51	-0.62	-0.12	Gaetani and Grove (1998)		Zr	0.007	Kelemen (1990)	0.027	McDade et al (2003)	0.103	McDade et al (2003)	0.06	Horn (1994)	Zr	0.02614					Cu	30.75			Salters and Stracke. (2004); Plank and Langmuir (1998)
				melting reaction for harzburgite	-0.19	-0.81			Parman and Grove (2004)		Cu	0.047	Li et al. (2022)	0.0279	Li et al. (2022)	0.0601	Li et al. (2022)	0.15	Li et al. (2022)	Cu	0.045415					Zr	6.776	6.776	5.526	Workman and Hart (2005); Plank and Langmuir (1998)
		Mineral modes (without sulfide)					Mineral modes (with sulfide)									Bulk D			Peridotite residue				instantaneous melt				Aggregated melt
F	Mass of residue	Ol	Opx	Cpx	Sp		Ol	Opx	Cpx	Sp	sulfide		SCSS	DCusulfide/melt		Cu	Zr		S	Cu	Zr		S	cu	Zr		S	Cu	Zr	Cu/Zr
0	1	0.57	0.28	0.13	0.02		0.569382	0.279696	0.129859	0.0199783	0.00108401		1474.62	625		0.722873	0.0261117		400	30.75	6.776		1474.62
0.01	0.99	0.5725	0.2749	0.1238	0.0188		0.577673	0.277384	0.124919	0.0189699	0.00105459		1474.62	625		0.704364	0.0255379		389.145	30.6326	4.93528		1474.62	42.3762	189.007		1474.62	42.3762	189.007	0.224204
0.02	0.98	0.575	0.2698	0.1176	0.0176		0.586134	0.275024	0.119877	0.0179408	0.00102458		1474.62	625		0.685478	0.0249524		378.069	30.5032	3.55831		1474.62	43.3079	139.879		1474.62	42.842	164.443	0.260528
0.03	0.97	0.5775	0.2647	0.1114	0.0164		0.594769	0.272615	0.114731	0.0168904	0.000993941		1474.62	625		0.666202	0.0243547		366.764	30.361	2.53791		1474.62	44.296	102.536		1474.62	43.3267	143.807	0.301283
0.04	0.96	0.58	0.2596	0.1052	0.0152		0.603585	0.270156	0.109478	0.0158181	0.000962667		1474.62	625		0.646525	0.0237446		355.224	30.2049	1.78934		1474.62	45.3461	74.4012		1474.62	43.8315	126.456	0.346615
0.05	0.95	0.5825	0.2545	0.099	0.014		0.612587	0.267645	0.104114	0.0147231	0.000930734		1474.62	625		0.626434	0.0231216		343.441	30.0338	1.24605		1474.62	46.4649	53.4016		1474.62	44.3582	111.845	0.396604
0.06	0.94	0.585	0.2494	0.0928	0.0128		0.621781	0.265081	0.0986347	0.0136048	0.000898122		1474.62	625		0.605915	0.0224853		331.407	29.8463	0.856275		1474.62	47.6599	37.8849		1474.62	44.9085	99.5184	0.451258
0.07	0.93	0.5875	0.2443	0.0866	0.0116		0.631174	0.262461	0.0930378	0.0124623	0.000864809		1474.62	625		0.584954	0.0218353		319.115	29.641	0.580079		1474.62	48.9399	26.5426		1474.62	45.4844	89.0932	0.510526
0.08	0.92	0.59	0.2392	0.0804	0.0104		0.640772	0.259784	0.0873187	0.011295	0.000830772		1474.62	625		0.563539	0.0211711		306.555	29.4162	0.386959		1474.62	50.3153	18.3471		1474.62	46.0882	80.25	0.574309
0.09	0.91	0.5925	0.2341	0.0742	0.0092		0.650581	0.257048	0.0814736	0.0101018	0.000795986		1474.62	625		0.541652	0.0204922		293.719	29.1703	0.25386		1474.62	51.798	12.4989		1474.62	46.7227	72.7221	0.642483
0.1	0.9	0.595	0.229	0.068	0.008		0.660608	0.254251	0.0754981	0.00888213	0.000760427		1474.62	625		0.519279	0.0197983		280.598	28.901	0.163551		1474.62	53.4024	8.38174		1474.62	47.3906	66.288	0.71492
0.11	0.89	0.5975	0.2239	0.0618	0.0068		0.670862	0.251391	0.0693879	0.00763492	0.00072407		1474.62	625		0.496403	0.0190886		267.182	28.6062	0.103306		1474.62	55.1456	5.52531		1474.62	48.0956	60.7642	0.791513
0.12	0.88	0.6	0.2188	0.0556	0.0056		0.68135	0.248466	0.0631384	0.00635927	0.000686886		1474.62	625		0.473008	0.0183628		253.461	28.283	0.0638564		1474.62	57.0481	3.57489		1474.62	48.8417	55.9984	0.872198
0.13	0.87	0.6025	0.2137	0.0494	0.0044		0.692079	0.245473	0.0567448	0.00505419	0.000648847		1474.62	625		0.449074	0.0176203		239.424	27.9283	0.0385435		1474.62	59.135	2.26608		1474.62	49.6335	51.8651	0.956972
0.14	0.86	0.605	0.2086	0.0432	0.0032		0.703059	0.24241	0.0502019	0.00371866	0.000609923		1474.62	625		0.424584	0.0168604		225.062	27.5387	0.022661		1474.62	61.4372	1.40444		1474.62	50.4766	48.2608	1.04591
0.15	0.85	0.6075	0.2035	0.037	0.002		0.714298	0.239275	0.0435046	0.0023516	0.000570084		1474.62	625		0.399518	0.0160826		210.361	27.1098	0.0129395		1474.62	63.9931	0.848987		1474.62	51.3777	45.1	1.13919
0.16	0.84	0.61	0.1984	0.0308	0.0008		0.725806	0.236065	0.0366473	0.000951877	0.000529296		1474.62	625		0.373854	0.0152862		195.31	26.6367	0.00715099		1474.62	66.8516	0.499176		1474.62	52.3448	42.3125	1.2371
0.17	0.83	0.6125	0.1933	0.0246	0		0.737237	0.232666	0.0296098	0	0.000487525		1474.62	625		0.347624	0.0144924		179.897	26.1133	0.00380917		1474.62	70.0752	0.284522		1474.62	53.3878	39.8402	1.34005
0.18	0.82	0.615	0.1882	0.0184	0		0.748207	0.228963	0.0223854	0	0.000444736		1474.62	625		0.320859	0.0137251		164.108	25.5326	0.0019477		1474.62	73.7356	0.15645		1474.62	54.5182	37.6356	1.44858
0.19	0.81	0.6175	0.1831	0.0122	0		0.759415	0.22518	0.0150038	0	0.00040089		1474.62	625		0.293433	0.0129412		147.928	24.8858	0.000952336		1474.62	77.9263	0.0825718		1474.62	55.7502	35.6591	1.56342
0.2	0.8	0.62	0.178	0.006	0		0.77087	0.221314	0.00746003	0	0.000355948		1474.62	625		0.265321	0.01214		131.345	24.1616	0.000442395		1474.62	82.8148	0.0417476		1474.62	57.1034	33.8782	1.68555
0.21	0.79	0.6225	0.1729	0	0		0.782383	0.217308	0	0	0.000309868		1474.62	625		0.236502	0.011344		114.341	23.3458	0.000193667		1474.62	88.6119	0.0200919		1474.62	58.6039	32.2659	1.81628
0.22	0.78	0.625	0.1678	0	0		0.788138	0.211599	0	0	0.000262606		1474.62	625		0.207075	0.0112301		96.9018	22.4191	7.92e-05		1474.62	95.6258	0.00912209		1474.62	60.2867	30.7997	1.95738
0.23	0.77	0.6275	0.1627	0	0		0.793933	0.205853	0	0	0.000214117		1474.62	625		0.176881	0.0111156		79.0093	21.3561	3.15223e-05		1474.62	104.273	0.00375038		1474.62	62.1991	29.4608	2.11125
0.24	0.76	0.63	0.1576	0	0		0.799767	0.200069	0	0	0.000164352		1474.62	625		0.145891	0.0110002		60.646	20.1191	1.21904e-05		1474.62	115.368	0.00150075		1474.62	64.4145	28.2333	2.28151
0.25	0.75	0.6325	0.1525	0	0		0.805641	0.194246	0	0	0.00011326		1474.62	625		0.114072	0.0108841		41.793	18.6503	4.57233e-06		1474.62	130.278	0.000583546		1474.62	67.049	27.104	2.47377
0.26	0.74	0.635	0.1474	0	0		0.811556	0.188383	0	0	6.07871e-05		1474.62	625		0.081391	0.0107672		22.4305	16.8522	1.65999e-06		1474.62	151.713	0.000220085		1474.62	70.3053	26.0615	2.69767
0.27	0.73	0.6375	0.1423	0	0		0.817512	0.182481	0	0	6.8765e-06		1474.62	625		0.0478121	0.0106496		2.53743	14.5344	5.8205e-07		1474.62	186.053	8.03499e-05		1474.62	74.5923	25.0963	2.97224
0.28	0.72	0.64	0.1372	0	0		0.823469	0.176531	0	0	0		1474.62	625		0.0436283	0.0105306		0	11.2153	1.96618e-07		1474.62	253.503	2.83331e-05		1474.62	80.982	24.2	3.34636
0.29	0.71	0.6425	0.1321	0	0		0.82946	0.17054	0	0	0		1474.62	625		0.0437427	0.0104108		0	8.40363	6.38072e-08		1474.62	210.846	9.6262e-06		1423.77	85.4601	23.3655	3.65753
0.3	0.7	0.645	0.127	0	0		0.835492	0.164508	0	0	0		1474.62	625		0.0438579	0.0102902		0	6.27153	1.98305e-08		1474.62	157.651	3.14218e-06		1376.31	87.8664	22.5867	3.89019
0.31	0.69	0.6475	0.1219	0	0		0.841565	0.158435	0	0	0		1474.62	625		0.0439739	0.0101687		0	4.66094	5.88126e-09		1474.62	117.402	9.82327e-07		1331.92	88.8192	21.8581	4.06345
0.32	0.68	0.65	0.1168	0	0		0.847679	0.152321	0	0	0		1474.62	625		0.0440907	0.0100464		0	3.44912	1.65774e-09		1474.62	87.0648	2.93081e-07		1290.29	88.7644	21.175	4.19194
0.33	0.67	0.6525	0.1117	0	0		0.853834	0.146166	0	0	0		1474.62	625		0.0442082	0.00992332		0	2.54105	4.4201e-10		1474.62	64.2896	8.31113e-08		1251.19	88.0227	20.5333	4.28682
0.34	0.66	0.655	0.1066	0	0		0.860032	0.139968	0	0	0		1474.62	625		0.0443266	0.00979937		0	1.86348	1.1088e-10		1474.62	47.2612	2.22966e-08		1214.39	86.8238	19.9294	4.35657
0.35	0.65	0.6575	0.1015	0	0		0.866271	0.133729	0	0	0		1474.62	625		0.0444458	0.00967457		0	1.36009	2.60006e-11		1474.62	34.5835	5.62801e-09		1179.7	85.3313	19.36	4.40761
0.36	0.64	0.66	0.0964	0	0		0.872554	0.127446	0	0	0		1474.62	625		0.0445658	0.00954892		0	0.987807	5.65587e-12		1474.62	25.1862	1.32807e-09		1146.93	83.6606	18.8222	4.44478
0.37	0.63	0.6625	0.0913	0	0		0.87888	0.12112	0	0	0		1474.62	625		0.0446866	0.00942239		0	0.71377	1.13074e-12		1474.62	18.2521	2.90739e-10		1115.93	81.8928	18.3135	4.47171
0.38	0.62	0.665	0.0862	0	0		0.88525	0.11475	0	0	0		1474.62	625		0.0448083	0.00929499		0	0.513032	2.05394e-13		1474.62	13.1595	5.85022e-11		1086.56	80.084	17.8316	4.49113
0.39	0.61	0.6675	0.0811	0	0		0.891664	0.108336	0	0	0		1474.62	625		0.0449308	0.00916671		0	0.366727	3.34093e-14		1474.62	9.43764	1.06965e-11		1058.7	78.2726	17.3744	4.50506
0.4	0.6	0.67	0.076	0	0		0.898123	0.101877	0	0	0		1474.62	625		0.0450542	0.00903753		0	0.260652	4.77501e-15		1474.62	6.73122	1.75147e-12		1032.23	76.484	16.94	4.515
0.41	0.59	0.6725	0.0709	0	0		0.904627	0.0953726	0	0	0		1474.62	625		0.0451784	0.00890745		0	0.184162	5.84465e-16		1474.62	4.77353	2.52017e-13		1007.06	74.735	16.5268	4.52204
0.42	0.58	0.675	0.0658	0	0		0.911177	0.0888229	0	0	0		1474.62	625		0.0453035	0.00877646		0	0.129318	5.90557e-17		1474.62	3.36514	3.10582e-14		983.081	73.0357	16.1333	4.52701
0.43	0.57	0.6775	0.0607	0	0		0.917773	0.082227	0	0	0		1474.62	625		0.0454295	0.00864454		0	0.0902246	4.6537e-18		1474.62	2.35765	3.15997e-15		960.218	71.392	15.7581	4.53049
0.44	0.56	0.68	0.0556	0	0		0.924415	0.0755846	0	0	0		1474.62	625		0.0455563	0.00851169		0	0.0625288	2.58876e-19		1474.62	1.64119	2.50764e-16		938.395	69.8068	15.4	4.53291
0.45	0.55	0.6825	0.0505	0	0		0.931105	0.068895	0	0	0		1474.62	625		0.0456841	0.0083779		0	0.0430328	8.14541e-21		1474.62	1.13481	1.4049e-17		917.542	68.2807	15.0578	4.53458
0.46	0.54	0.685	0.0454	0	0		0.937842	0.0621577	0	0	0		1474.62	625		0.0458128	0.00824315		0	0.0294002	5.09281e-23		1474.62	0.779195	4.45248e-19		897.595	66.8133	14.7304	4.53573
0.47	0.53	0.6875	0.0403	0	0		0.944628	0.0553724	0	0	0		1474.62	625		0.0459424	0.00810745		0	0.0199337	0		1474.62	0.531124	2.8043e-21		878.498	65.4031	14.417	4.53652
0.48	0.52	0.69	0.0352	0	0		0.951462	0.0485383	0	0	0		1474.62	625		0.0460729	0.00797077		0	0.0134079	0		1474.62	0.359276	0		860.196	64.048	14.1167	4.53705
0.49	0.51	0.6925	0.0301	0	0		0.958345	0.0416551	0	0	0		1474.62	625		0.0462044	0.0078331		0	0.00894341	0		1474.62	0.241096	0		842.641	62.7458	13.8286	4.5374
0.5	0.5	0.695	0.025	0	0		0.965278	0.0347222	0	0	0		1474.62	625		0.0463368	0.00769444		0	0.00591344	0		1474.62	0.160442	0		825.788	61.4941	13.552	4.53764
0.51	0.49	0.6975	0.0199	0	0		0.972261	0.0277391	0	0	0		1474.62	625		0.0464702	0.00755478		0	0.0038742	0		1474.62	0.105836	0		809.596	60.2904	13.2863	4.5378
0.52	0.48	0.7	0.0148	0	0		0.979295	0.0207051	0	0	0		1474.62	625		0.0466045	0.0074141		0	0.00251376	0		1474.62	0.0691753	0		794.027	59.1323	13.0308	4.5379
0.53	0.47	0.7025	0.0097	0	0		0.98638	0.0136198	0	0	0		1474.62	625		0.0467399	0.0072724		0	0.00161452	0		1474.62	0.0447778	0		779.045	58.0174	12.7849	4.53796
0.54	0.46	0.705	0.0046	0	0		0.993517	0.00648253	0	0	0		1474.62	625		0.0468762	0.00712965		0	0.0010259	0		1474.62	0.0286912	0		764.618	56.9436	12.5481	4.53801
0.55	0.45	0.7075	0	0	0		1	0	0	0	0		1474.62	625		0.047	0.007		0	0.000644535	0		1474.62	0.0181873	0		750.716	55.9086	12.32	4.53803
0.56	0.44	0.71	0	0	0		1	0	0	0	0		1474.62	625		0.047	0.007		0	0.000400055	0		1474.62	0.0114016	0		737.311	54.9104	12.1	4.53805
0.57	0.43	0.7125	0	0	0		1	0	0	0	0		1474.62	625		0.047	0.007		0	0.00024478	0		1474.62	0.00707686	0		724.375	53.9472	11.8877	4.53806
0.58	0.42	0.715	0	0	0		1	0	0	0	0		1474.62	625		0.047	0.007		0	0.000147511	0		1474.62	0.0043301	0		711.886	53.0171	11.6828	4.53807
0.59	0.41	0.7175	0	0	0		1	0	0	0	0		1474.62	625		0.047	0.007		0	8.74642e-05	0		1474.62	0.00260943	0		699.82	52.1186	11.4847	4.53807
0.6	0.4	0.72	0	0	0		1	0	0	0	0		1474.62	625		0.047	0.007		0	5.09704e-05	0		1474.62	0.00154722	0		688.156	51.25	11.2933	4.53807
0.61	0.39	0.7225	0	0	0		1	0	0	0	0		1474.62	625		0.047	0.007		0	2.9158e-05	0		1474.62	0.000901652	0		676.875	50.4098	11.1082	4.53807
0.62	0.38	0.725	0	0	0		1	0	0	0	0		1474.62	625		0.047	0.007		0	1.63517e-05	0		1474.62	0.000515798	0		665.958	49.5968	10.929	4.53807
0.63	0.37	0.7275	0	0	0		1	0	0	0	0		1474.62	625		0.047	0.007		0	8.9759e-06	0		1474.62	0.000289258	0		655.387	48.8095	10.7556	4.53808
0.64	0.36	0.73	0	0	0		1	0	0	0	0		1474.62	625		0.047	0.007		0	4.81464e-06	0		1474.62	0.000158781	0		645.147	48.0469	10.5875	4.53808
0.65	0.35	0.7325	0	0	0		1	0	0	0	0		1474.62	625		0.047	0.007		0	2.51878e-06	0		1474.62	8.51697e-05	0		635.221	47.3077	10.4246	4.53808
0.66	0.34	0.735	0	0	0		1	0	0	0	0		1474.62	625		0.047	0.007		0	1.28238e-06	0		1474.62	4.45566e-05	0		625.597	46.5909	10.2667	4.53808
0.67	0.33	0.7375	0	0	0		1	0	0	0	0		1474.62	625		0.047	0.007		0	6.33816e-07	0		1474.62	2.26849e-05	0		616.26	45.8955	10.1134	4.53808
0.68	0.32	0.74	0	0	0		1	0	0	0	0		1474.62	625		0.047	0.007		0	3.03247e-07	0		1474.62	1.1212e-05	0		607.197	45.2206	9.96471	4.53808
0.69	0.31	0.7425	0	0	0		1	0	0	0	0		1474.62	625		0.047	0.007		0	1.39985e-07	0		1474.62	5.36435e-06	0		598.397	44.5652	9.82029	4.53808
0.7	0.3	0.745	0	0	0		1	0	0	0	0		1474.62	625		0.047	0.007		0	6.21082e-08	0		1474.62	2.4763e-06	0		589.848	43.9286	9.68	4.53808
0.71	0.29	0.7475	0	0	0		1	0	0	0	0		1474.62	625		0.047	0.007		0	2.63644e-08	0		1474.62	1.09868e-06	0		581.541	43.3099	9.54366	4.53808
0.72	0.28	0.75	0	0	0		1	0	0	0	0		1474.62	625		0.047	0.007		0	1.06496e-08	0		1474.62	4.6638e-07	0		573.464	42.7083	9.41111	4.53808
0.73	0.27	0.7525	0	0	0		1	0	0	0	0		1474.62	625		0.047	0.007		0	4.06668e-09	0		1474.62	1.88389e-07	0		565.608	42.1233	9.28219	4.53808
0.74	0.26	0.755	0	0	0		1	0	0	0	0		1474.62	625		0.047	0.007		0	1.45623e-09	0		1474.62	7.19385e-08	0		557.965	41.5541	9.15676	4.53808
0.75	0.25	0.7575	0	0	0		1	0	0	0	0		1474.62	625		0.047	0.007		0	4.84067e-10	0		1474.62	2.57603e-08	0		550.525	41	9.03467	4.53808
0.76	0.24	0.76	0	0	0		1	0	0	0	0		1474.62	625		0.047	0.007		0	1.47444e-10	0		1474.62	8.56301e-09	0		543.281	40.4605	8.91579	4.53808
0.77	0.23	0.7625	0	0	0		1	0	0	0	0		1474.62	625		0.047	0.007		0	4.04528e-11	0		1474.62	2.60825e-09	0		536.226	39.9351	8.8	4.53808
0.78	0.22	0.765	0	0	0		1	0	0	0	0		1474.62	625		0.047	0.007		0	9.76434e-12	0		1474.62	7.15599e-10	0		529.351	39.4231	8.68718	4.53808
0.79	0.21	0.7675	0	0	0		1	0	0	0	0		1474.62	625		0.047	0.007		0	2.00414e-12	0		1474.62	1.72729e-10	0		522.65	38.9241	8.57722	4.53808
0.8	0.2	0.77	0	0	0		1	0	0	0	0		1474.62	625		0.047	0.007		0	3.31714e-13	0		1474.62	3.54528e-11	0		516.117	38.4375	8.47	4.53808
0.81	0.19	0.7725	0	0	0		1	0	0	0	0		1474.62	625		0.047	0.007		0	4.03343e-14	0		1474.62	5.86792e-12	0		509.746	37.963	8.36543	4.53808
0.82	0.18	0.775	0	0	0		1	0	0	0	0		1474.62	625		0.047	0.007		0	2.93606e-15	0		1474.62	7.13502e-13	0		503.529	37.5	8.26341	4.53808
0.83	0.17	0.7775	0	0	0		1	0	0	0	0		1474.62	625		0.047	0.007		0	5.35879e-17	0		1474.62	5.19381e-14	0		497.463	37.0482	8.16386	4.53808
0.84	0.16	0.78	0	0	0		1	0	0	0	0		1474.62	625		0.047	0.007		0	-2.31005e-18	0		1474.62	9.47955e-16	0		491.54	36.6071	8.06667	4.53808
0.85	0.15	0.7825	0	0	0		1	0	0	0	0		1474.62	625		0.047	0.007		0	2.60223e-19	0		1474.62	-4.08641e-17	0		485.758	36.1765	7.97176	4.53808
0.86	0.14	0.785	0	0	0		1	0	0	0	0		1474.62	625		0.047	0.007		0	-4.99947e-20	0		1474.62	4.60326e-18	0		480.109	35.7558	7.87907	4.53808
0.87	0.13	0.7875	0	0	0		1	0	0	0	0		1474.62	625		0.047	0.007		0	1.41897e-20	0		1474.62	-8.84393e-19	0		474.591	35.3448	7.78851	4.53808
0.88	0.12	0.79	0	0	0		1	0	0	0	0		1474.62	625		0.047	0.007		0	-5.5455e-21	0		1474.62	2.51013e-19	0		469.198	34.9432	7.7	4.53808
0.89	0.11	0.7925	0	0	0		1	0	0	0	0		1474.62	625		0.047	0.007		0	2.86839e-21	0		1474.62	-9.80983e-20	0		463.926	34.5506	7.61348	4.53808
0.9	0.1	0.795	0	0	0		1	0	0	0	0		1474.62	625		0.047	0.007		0	-1.91888e-21	0		1474.62	5.07411e-20	0		458.771	34.1667	7.52889	4.53808
0.91	0.09	0.7975	0	0	0		1	0	0	0	0		1474.62	625		0.047	0.007		0	1.63951e-21	0		1474.62	-3.39444e-20	0		453.73	33.7912	7.44615	4.53808
0.92	0.08	0.8	0	0	0		1	0	0	0	0		1474.62	625		0.047	0.007		0	-1.78087e-21	0		1474.62	2.90025e-20	0		448.798	33.4239	7.36522	4.53808
0.93	0.07	0.8025	0	0	0		1	0	0	0	0		1474.62	625		0.047	0.007		0	2.46516e-21	0		1474.62	-3.1503e-20	0		443.972	33.0645	7.28602	4.53808
0.94	0.06	0.805	0	0	0		1	0	0	0	0		1474.62	625		0.047	0.007		0	-4.39197e-21	0		1474.62	4.36079e-20	0		439.249	32.7128	7.20851	4.53808
0.95	0.05	0.8075	0	0	0		1	0	0	0	0		1474.62	625		0.047	0.007		0	1.02682e-20	0		1474.62	-7.76927e-20	0		434.625	32.3684	7.13263	4.53808
0.96	0.04	0.81	0	0	0		1	0	0	0	0		1474.62	625		0.047	0.007		0	-3.25751e-20	0		1474.62	1.81641e-19	0		430.098	32.0313	7.05833	4.53808
0.97	0.03	0.8125	0	0	0		1	0	0	0	0		1474.62	625		0.047	0.007		0	1.48648e-19	0		1474.62	-5.76245e-19	0		425.664	31.701	6.98557	4.53808
0.98	0.02	0.815	0	0	0		1	0	0	0	0		1474.62	625		0.047	0.007		0	-1.0918e-18	0		1474.62	2.62954e-18	0		421.32	31.3776	6.91429	4.53808
0.99	0.01	0.8175	0	0	0		1	0	0	0	0		1474.62	625		0.047	0.007		0	1.713e-17	0		1474.62	-1.93136e-17	0		417.065	31.0606	6.84444	4.53808
mantle melting condition				Mineral modes and melting reaction of the mantle							Dmineral/melt for Cu and Zr											S in the mantle sulfides				S, Cu, and Zr in the mantle
fO2(FMQ)					Ol	Opx	Cpx	Sp	Reference		phase	Ol		Opx		Cpx		Sp		Bulk D		composition	S in sulfide(ppm)	S in sulfide(wt%)	Reference	Co (ppm)	Average	uncertainty		Reference
1.1				spinel lherzolite(DMM)	0.57	0.28	0.13	0.02	Workman and Hart (2005)			D	Reference	D	Reference	D	Reference	D	Reference			(Fe,Ni,Cu)S	369000	36.9	Jugo et al. (2005)	S	400	300		estimated
				melting reaction for lherzolite	0.25	-0.51	-0.62	-0.12	Gaetani and Grove (1998)		Zr	0.007	Kelemen (1990)	0.027	McDade et al (2003)	0.103	McDade et al (2003)	0.06	Horn (1994)	Zr	0.02614					Cu	30.75			Salters and Stracke. (2004); Plank and Langmuir (1998)
				melting reaction for harzburgite	-0.19	-0.81			Parman and Grove (2004)		Cu	0.047	Li et al. (2022)	0.0279	Li et al. (2022)	0.0601	Li et al. (2022)	0.15	Li et al. (2022)	Cu	0.045415					Zr	6.331	6.776	5.526	Workman and Hart (2005); Plank and Langmuir (1998)
		Mineral modes (without sulfide)					Mineral modes (with sulfide)									Bulk D			Peridotite residue				instantaneous melt				Aggregated melt
F	Mass of residue	Ol	Opx	Cpx	Sp		Ol	Opx	Cpx	Sp	sulfide		SCSS	DCusulfide/melt		Cu	Zr		S	Cu	Zr		S	cu	Zr		S	Cu	Zr	Cu/Zr
0	1	0.57	0.28	0.13	0.02		0.569382	0.279696	0.129859	0.0199783	0.00108401		1474.62	625		0.722873	0.0261117		400	30.75	6.331		1474.62
0.01	0.99	0.5725	0.2749	0.1238	0.0188		0.577673	0.277384	0.124919	0.0189699	0.00105459		1474.62	625		0.704364	0.0255379		389.145	30.6326	4.61117		1474.62	42.3762	176.594		1474.62	42.3762	176.594	0.239963
0.02	0.98	0.575	0.2698	0.1176	0.0176		0.586134	0.275024	0.119877	0.0179408	0.00102458		1474.62	625		0.685478	0.0249524		378.069	30.5032	3.32462		1474.62	43.3079	130.693		1474.62	42.842	153.644	0.27884
0.03	0.97	0.5775	0.2647	0.1114	0.0164		0.594769	0.272615	0.114731	0.0168904	0.000993941		1474.62	625		0.666202	0.0243547		366.764	30.361	2.37124		1474.62	44.296	95.8026		1474.62	43.3267	134.363	0.322459
0.04	0.96	0.58	0.2596	0.1052	0.0152		0.603585	0.270156	0.109478	0.0158181	0.000962667		1474.62	625		0.646525	0.0237446		355.224	30.2049	1.67183		1474.62	45.3461	69.5151		1474.62	43.8315	118.151	0.370978
0.05	0.95	0.5825	0.2545	0.099	0.014		0.612587	0.267645	0.104114	0.0147231	0.000930734		1474.62	625		0.626434	0.0231216		343.441	30.0338	1.16422		1474.62	46.4649	49.8946		1474.62	44.3582	104.5	0.424481
0.06	0.94	0.585	0.2494	0.0928	0.0128		0.621781	0.265081	0.0986347	0.0136048	0.000898122		1474.62	625		0.605915	0.0224853		331.407	29.8463	0.800041		1474.62	47.6599	35.3969		1474.62	44.9085	92.9827	0.482977
0.07	0.93	0.5875	0.2443	0.0866	0.0116		0.631174	0.262461	0.0930378	0.0124623	0.000864809		1474.62	625		0.584954	0.0218353		319.115	29.641	0.541983		1474.62	48.9399	24.7994		1474.62	45.4844	83.2422	0.54641
0.08	0.92	0.59	0.2392	0.0804	0.0104		0.640772	0.259784	0.0873187	0.011295	0.000830772		1474.62	625		0.563539	0.0211711		306.555	29.4162	0.361546		1474.62	50.3153	17.1422		1474.62	46.0882	74.9797	0.614676
0.09	0.91	0.5925	0.2341	0.0742	0.0092		0.650581	0.257048	0.0814736	0.0101018	0.000795986		1474.62	625		0.541652	0.0204922		293.719	29.1703	0.237189		1474.62	51.798	11.6781		1474.62	46.7227	67.9462	0.687642
0.1	0.9	0.595	0.229	0.068	0.008		0.660608	0.254251	0.0754981	0.00888213	0.000760427		1474.62	625		0.519279	0.0197983		280.598	28.901	0.15281		1474.62	53.4024	7.83129		1474.62	47.3906	61.9347	0.765171
0.11	0.89	0.5975	0.2239	0.0618	0.0068		0.670862	0.251391	0.0693879	0.00763492	0.00072407		1474.62	625		0.496403	0.0190886		267.182	28.6062	0.0965218		1474.62	55.1456	5.16244		1474.62	48.0956	56.7736	0.847148
0.12	0.88	0.6	0.2188	0.0556	0.0056		0.68135	0.248466	0.0631384	0.00635927	0.000686886		1474.62	625		0.473008	0.0183628		253.461	28.283	0.0596628		1474.62	57.0481	3.34011		1474.62	48.8417	52.3208	0.933504
0.13	0.87	0.6025	0.2137	0.0494	0.0044		0.692079	0.245473	0.0567448	0.00505419	0.000648847		1474.62	625		0.449074	0.0176203		239.424	27.9283	0.0360122		1474.62	59.135	2.11726		1474.62	49.6335	48.459	1.02424
0.14	0.86	0.605	0.2086	0.0432	0.0032		0.703059	0.24241	0.0502019	0.00371866	0.000609923		1474.62	625		0.424584	0.0168604		225.062	27.5387	0.0211728		1474.62	61.4372	1.3122		1474.62	50.4766	45.0914	1.11943
0.15	0.85	0.6075	0.2035	0.037	0.002		0.714298	0.239275	0.0435046	0.0023516	0.000570084		1474.62	625		0.399518	0.0160826		210.361	27.1098	0.0120897		1474.62	63.9931	0.793232		1474.62	51.3777	42.1382	1.21927
0.16	0.84	0.61	0.1984	0.0308	0.0008		0.725806	0.236065	0.0366473	0.000951877	0.000529296		1474.62	625		0.373854	0.0152862		195.31	26.6367	0.00668136		1474.62	66.8516	0.466393		1474.62	52.3448	39.5337	1.32406
0.17	0.83	0.6125	0.1933	0.0246	0		0.737237	0.232666	0.0296098	0	0.000487525		1474.62	625		0.347624	0.0144924		179.897	26.1133	0.00355901		1474.62	70.0752	0.265837		1474.62	53.3878	37.2238	1.43424
0.18	0.82	0.615	0.1882	0.0184	0		0.748207	0.228963	0.0223854	0	0.000444736		1474.62	625		0.320859	0.0137251		164.108	25.5326	0.00181978		1474.62	73.7356	0.146175		1474.62	54.5182	35.1639	1.5504
0.19	0.81	0.6175	0.1831	0.0122	0		0.759415	0.22518	0.0150038	0	0.00040089		1474.62	625		0.293433	0.0129412		147.928	24.8858	0.000889793		1474.62	77.9263	0.0771491		1474.62	55.7502	33.3173	1.67331
0.2	0.8	0.62	0.178	0.006	0		0.77087	0.221314	0.00746003	0	0.000355948		1474.62	625		0.265321	0.01214		131.345	24.1616	0.000413342		1474.62	82.8148	0.0390059		1474.62	57.1034	31.6533	1.80403
0.21	0.79	0.6225	0.1729	0	0		0.782383	0.217308	0	0	0.000309868		1474.62	625		0.236502	0.011344		114.341	23.3458	0.000180948		1474.62	88.6119	0.0187724		1474.62	58.6039	30.1469	1.94394
0.22	0.78	0.625	0.1678	0	0		0.788138	0.211599	0	0	0.000262606		1474.62	625		0.207075	0.0112301		96.9018	22.4191	7.39987e-05		1474.62	95.6258	0.00852302		1474.62	60.2867	28.777	2.09496
0.23	0.77	0.6275	0.1627	0	0		0.793933	0.205853	0	0	0.000214117		1474.62	625		0.176881	0.0111156		79.0093	21.3561	2.94521e-05		1474.62	104.273	0.00350408		1474.62	62.1991	27.526	2.25965
0.24	0.76	0.63	0.1576	0	0		0.799767	0.200069	0	0	0.000164352		1474.62	625		0.145891	0.0110002		60.646	20.1191	1.13898e-05		1474.62	115.368	0.00140219		1474.62	64.4145	26.3791	2.44187
0.25	0.75	0.6325	0.1525	0	0		0.805641	0.194246	0	0	0.00011326		1474.62	625		0.114072	0.0108841		41.793	18.6503	4.27205e-06		1474.62	130.278	0.000545222		1474.62	67.049	25.324	2.64765
0.26	0.74	0.635	0.1474	0	0		0.811556	0.188383	0	0	6.07871e-05		1474.62	625		0.081391	0.0107672		22.4305	16.8522	1.55098e-06		1474.62	151.713	0.000205631		1474.62	70.3053	24.35	2.88728
0.27	0.73	0.6375	0.1423	0	0		0.817512	0.182481	0	0	6.8765e-06		1474.62	625		0.0478121	0.0106496		2.53743	14.5344	5.43825e-07		1474.62	186.053	7.50731e-05		1474.62	74.5923	23.4481	3.18116
0.28	0.72	0.64	0.1372	0	0		0.823469	0.176531	0	0	0		1474.62	625		0.0436283	0.0105306		0	11.2153	1.83706e-07		1474.62	253.503	2.64724e-05		1474.62	80.982	22.6107	3.58158
0.29	0.71	0.6425	0.1321	0	0		0.82946	0.17054	0	0	0		1474.62	625		0.0437427	0.0104108		0	8.40363	5.96168e-08		1474.62	210.846	8.99402e-06		1423.77	85.4601	21.831	3.91461
0.3	0.7	0.645	0.127	0	0		0.835492	0.164508	0	0	0		1474.62	625		0.0438579	0.0102902		0	6.27153	1.85282e-08		1474.62	157.651	2.93582e-06		1376.31	87.8664	21.1033	4.16363
0.31	0.69	0.6475	0.1219	0	0		0.841565	0.158435	0	0	0		1474.62	625		0.0439739	0.0101687		0	4.66094	5.49502e-09		1474.62	117.402	9.17815e-07		1331.92	88.8192	20.4226	4.34907
0.32	0.68	0.65	0.1168	0	0		0.847679	0.152321	0	0	0		1474.62	625		0.0440907	0.0100464		0	3.44912	1.54887e-09		1474.62	87.0648	2.73833e-07		1290.29	88.7644	19.7844	4.48659
0.33	0.67	0.6525	0.1117	0	0		0.853834	0.146166	0	0	0		1474.62	625		0.0442082	0.00992332		0	2.54105	4.12982e-10		1474.62	64.2896	7.76531e-08		1251.19	88.0227	19.1848	4.58814
0.34	0.66	0.655	0.1066	0	0		0.860032	0.139968	0	0	0		1474.62	625		0.0443266	0.00979937		0	1.86348	1.03598e-10		1474.62	47.2612	2.08323e-08		1214.39	86.8238	18.6206	4.66279
0.35	0.65	0.6575	0.1015	0	0		0.866271	0.133729	0	0	0		1474.62	625		0.0444458	0.00967457		0	1.36009	2.42931e-11		1474.62	34.5835	5.25841e-09		1179.7	85.3313	18.0886	4.71741
0.36	0.64	0.66	0.0964	0	0		0.872554	0.127446	0	0	0		1474.62	625		0.0445658	0.00954892		0	0.987807	5.28443e-12		1474.62	25.1862	1.24085e-09		1146.93	83.6606	17.5861	4.7572
0.37	0.63	0.6625	0.0913	0	0		0.87888	0.12112	0	0	0		1474.62	625		0.0446866	0.00942239		0	0.71377	1.05648e-12		1474.62	18.2521	2.71645e-10		1115.93	81.8928	17.1108	4.78603
0.38	0.62	0.665	0.0862	0	0		0.88525	0.11475	0	0	0		1474.62	625		0.0448083	0.00929499		0	0.513032	1.91906e-13		1474.62	13.1595	5.46602e-11		1086.56	80.084	16.6605	4.80681
0.39	0.61	0.6675	0.0811	0	0		0.891664	0.108336	0	0	0		1474.62	625		0.0449308	0.00916671		0	0.366727	3.12152e-14		1474.62	9.43764	9.99402e-12		1058.7	78.2726	16.2333	4.82172
0.4	0.6	0.67	0.076	0	0		0.898123	0.101877	0	0	0		1474.62	625		0.0450542	0.00903753		0	0.260652	4.46142e-15		1474.62	6.73122	1.63644e-12		1032.23	76.484	15.8275	4.83235
0.41	0.59	0.6725	0.0709	0	0		0.904627	0.0953726	0	0	0		1474.62	625		0.0451784	0.00890745		0	0.184162	5.46081e-16		1474.62	4.77353	2.35467e-13		1007.06	74.735	15.4415	4.83989
0.42	0.58	0.675	0.0658	0	0		0.911177	0.0888229	0	0	0		1474.62	625		0.0453035	0.00877646		0	0.129318	5.51773e-17		1474.62	3.36514	2.90185e-14		983.081	73.0357	15.0738	4.84521
0.43	0.57	0.6775	0.0607	0	0		0.917773	0.082227	0	0	0		1474.62	625		0.0454295	0.00864454		0	0.0902246	4.34808e-18		1474.62	2.35765	2.95244e-15		960.218	71.392	14.7233	4.84893
0.44	0.56	0.68	0.0556	0	0		0.924415	0.0755846	0	0	0		1474.62	625		0.0455563	0.00851169		0	0.0625288	2.41874e-19		1474.62	1.64119	2.34296e-16		938.395	69.8068	14.3886	4.85152
0.45	0.55	0.6825	0.0505	0	0		0.931105	0.068895	0	0	0		1474.62	625		0.0456841	0.0083779		0	0.0430328	7.61048e-21		1474.62	1.13481	1.31264e-17		917.542	68.2807	14.0689	4.85331
0.46	0.54	0.685	0.0454	0	0		0.937842	0.0621577	0	0	0		1474.62	625		0.0458128	0.00824315		0	0.0294002	4.75835e-23		1474.62	0.779195	4.16007e-19		897.595	66.8133	13.763	4.85454
0.47	0.53	0.6875	0.0403	0	0		0.944628	0.0553724	0	0	0		1474.62	625		0.0459424	0.00810745		0	0.0199337	0		1474.62	0.531124	2.62013e-21		878.498	65.4031	13.4702	4.85538
0.48	0.52	0.69	0.0352	0	0		0.951462	0.0485383	0	0	0		1474.62	625		0.0460729	0.00797077		0	0.0134079	0		1474.62	0.359276	0		860.196	64.048	13.1896	4.85595
0.49	0.51	0.6925	0.0301	0	0		0.958345	0.0416551	0	0	0		1474.62	625		0.0462044	0.0078331		0	0.00894341	0		1474.62	0.241096	0		842.641	62.7458	12.9204	4.85633
0.5	0.5	0.695	0.025	0	0		0.965278	0.0347222	0	0	0		1474.62	625		0.0463368	0.00769444		0	0.00591344	0		1474.62	0.160442	0		825.788	61.4941	12.662	4.85659
0.51	0.49	0.6975	0.0199	0	0		0.972261	0.0277391	0	0	0		1474.62	625		0.0464702	0.00755478		0	0.0038742	0		1474.62	0.105836	0		809.596	60.2904	12.4137	4.85675
0.52	0.48	0.7	0.0148	0	0		0.979295	0.0207051	0	0	0		1474.62	625		0.0466045	0.0074141		0	0.00251376	0		1474.62	0.0691753	0		794.027	59.1323	12.175	4.85686
0.53	0.47	0.7025	0.0097	0	0		0.98638	0.0136198	0	0	0		1474.62	625		0.0467399	0.0072724		0	0.00161452	0		1474.62	0.0447778	0		779.045	58.0174	11.9453	4.85693
0.54	0.46	0.705	0.0046	0	0		0.993517	0.00648253	0	0	0		1474.62	625		0.0468762	0.00712965		0	0.0010259	0		1474.62	0.0286912	0		764.618	56.9436	11.7241	4.85698
0.55	0.45	0.7075	0	0	0		1	0	0	0	0		1474.62	625		0.047	0.007		0	0.000644535	0		1474.62	0.0181873	0		750.716	55.9086	11.5109	4.85701
0.56	0.44	0.71	0	0	0		1	0	0	0	0		1474.62	625		0.047	0.007		0	0.000400055	0		1474.62	0.0114016	0		737.311	54.9104	11.3054	4.85702
0.57	0.43	0.7125	0	0	0		1	0	0	0	0		1474.62	625		0.047	0.007		0	0.00024478	0		1474.62	0.00707686	0		724.375	53.9472	11.107	4.85704
0.58	0.42	0.715	0	0	0		1	0	0	0	0		1474.62	625		0.047	0.007		0	0.000147511	0		1474.62	0.0043301	0		711.886	53.0171	10.9155	4.85704
0.59	0.41	0.7175	0	0	0		1	0	0	0	0		1474.62	625		0.047	0.007		0	8.74642e-05	0		1474.62	0.00260943	0		699.82	52.1186	10.7305	4.85705
0.6	0.4	0.72	0	0	0		1	0	0	0	0		1474.62	625		0.047	0.007		0	5.09704e-05	0		1474.62	0.00154722	0		688.156	51.25	10.5517	4.85705
0.61	0.39	0.7225	0	0	0		1	0	0	0	0		1474.62	625		0.047	0.007		0	2.9158e-05	0		1474.62	0.000901652	0		676.875	50.4098	10.3787	4.85705
0.62	0.38	0.725	0	0	0		1	0	0	0	0		1474.62	625		0.047	0.007		0	1.63517e-05	0		1474.62	0.000515798	0		665.958	49.5968	10.2113	4.85705
0.63	0.37	0.7275	0	0	0		1	0	0	0	0		1474.62	625		0.047	0.007		0	8.9759e-06	0		1474.62	0.000289258	0		655.387	48.8095	10.0492	4.85705
0.64	0.36	0.73	0	0	0		1	0	0	0	0		1474.62	625		0.047	0.007		0	4.81464e-06	0		1474.62	0.000158781	0		645.147	48.0469	9.89219	4.85705
0.65	0.35	0.7325	0	0	0		1	0	0	0	0		1474.62	625		0.047	0.007		0	2.51878e-06	0		1474.62	8.51697e-05	0		635.221	47.3077	9.74	4.85705
0.66	0.34	0.735	0	0	0		1	0	0	0	0		1474.62	625		0.047	0.007		0	1.28238e-06	0		1474.62	4.45566e-05	0		625.597	46.5909	9.59242	4.85705
0.67	0.33	0.7375	0	0	0		1	0	0	0	0		1474.62	625		0.047	0.007		0	6.33816e-07	0		1474.62	2.26849e-05	0		616.26	45.8955	9.44925	4.85705
0.68	0.32	0.74	0	0	0		1	0	0	0	0		1474.62	625		0.047	0.007		0	3.03247e-07	0		1474.62	1.1212e-05	0		607.197	45.2206	9.31029	4.85705
0.69	0.31	0.7425	0	0	0		1	0	0	0	0		1474.62	625		0.047	0.007		0	1.39985e-07	0		1474.62	5.36435e-06	0		598.397	44.5652	9.17536	4.85705
0.7	0.3	0.745	0	0	0		1	0	0	0	0		1474.62	625		0.047	0.007		0	6.21082e-08	0		1474.62	2.4763e-06	0		589.848	43.9286	9.04429	4.85705
0.71	0.29	0.7475	0	0	0		1	0	0	0	0		1474.62	625		0.047	0.007		0	2.63644e-08	0		1474.62	1.09868e-06	0		581.541	43.3099	8.9169	4.85705
0.72	0.28	0.75	0	0	0		1	0	0	0	0		1474.62	625		0.047	0.007		0	1.06496e-08	0		1474.62	4.6638e-07	0		573.464	42.7083	8.79306	4.85705
0.73	0.27	0.7525	0	0	0		1	0	0	0	0		1474.62	625		0.047	0.007		0	4.06668e-09	0		1474.62	1.88389e-07	0		565.608	42.1233	8.6726	4.85705
0.74	0.26	0.755	0	0	0		1	0	0	0	0		1474.62	625		0.047	0.007		0	1.45623e-09	0		1474.62	7.19385e-08	0		557.965	41.5541	8.55541	4.85705
0.75	0.25	0.7575	0	0	0		1	0	0	0	0		1474.62	625		0.047	0.007		0	4.84067e-10	0		1474.62	2.57603e-08	0		550.525	41	8.44133	4.85705
0.76	0.24	0.76	0	0	0		1	0	0	0	0		1474.62	625		0.047	0.007		0	1.47444e-10	0		1474.62	8.56301e-09	0		543.281	40.4605	8.33026	4.85705
0.77	0.23	0.7625	0	0	0		1	0	0	0	0		1474.62	625		0.047	0.007		0	4.04528e-11	0		1474.62	2.60825e-09	0		536.226	39.9351	8.22208	4.85705
0.78	0.22	0.765	0	0	0		1	0	0	0	0		1474.62	625		0.047	0.007		0	9.76434e-12	0		1474.62	7.15599e-10	0		529.351	39.4231	8.11667	4.85705
0.79	0.21	0.7675	0	0	0		1	0	0	0	0		1474.62	625		0.047	0.007		0	2.00414e-12	0		1474.62	1.72729e-10	0		522.65	38.9241	8.01392	4.85705
0.8	0.2	0.77	0	0	0		1	0	0	0	0		1474.62	625		0.047	0.007		0	3.31714e-13	0		1474.62	3.54528e-11	0		516.117	38.4375	7.91375	4.85705
0.81	0.19	0.7725	0	0	0		1	0	0	0	0		1474.62	625		0.047	0.007		0	4.03343e-14	0		1474.62	5.86792e-12	0		509.746	37.963	7.81605	4.85705
0.82	0.18	0.775	0	0	0		1	0	0	0	0		1474.62	625		0.047	0.007		0	2.93606e-15	0		1474.62	7.13502e-13	0		503.529	37.5	7.72073	4.85705
0.83	0.17	0.7775	0	0	0		1	0	0	0	0		1474.62	625		0.047	0.007		0	5.35879e-17	0		1474.62	5.19381e-14	0		497.463	37.0482	7.62771	4.85705
0.84	0.16	0.78	0	0	0		1	0	0	0	0		1474.62	625		0.047	0.007		0	-2.31005e-18	0		1474.62	9.47955e-16	0		491.54	36.6071	7.5369	4.85705
0.85	0.15	0.7825	0	0	0		1	0	0	0	0		1474.62	625		0.047	0.007		0	2.60223e-19	0		1474.62	-4.08641e-17	0		485.758	36.1765	7.44824	4.85705
0.86	0.14	0.785	0	0	0		1	0	0	0	0		1474.62	625		0.047	0.007		0	-4.99947e-20	0		1474.62	4.60326e-18	0		480.109	35.7558	7.36163	4.85705
0.87	0.13	0.7875	0	0	0		1	0	0	0	0		1474.62	625		0.047	0.007		0	1.41897e-20	0		1474.62	-8.84393e-19	0		474.591	35.3448	7.27701	4.85705
0.88	0.12	0.79	0	0	0		1	0	0	0	0		1474.62	625		0.047	0.007		0	-5.5455e-21	0		1474.62	2.51013e-19	0		469.198	34.9432	7.19432	4.85705
0.89	0.11	0.7925	0	0	0		1	0	0	0	0		1474.62	625		0.047	0.007		0	2.86839e-21	0		1474.62	-9.80983e-20	0		463.926	34.5506	7.11348	4.85705
0.9	0.1	0.795	0	0	0		1	0	0	0	0		1474.62	625		0.047	0.007		0	-1.91888e-21	0		1474.62	5.07411e-20	0		458.771	34.1667	7.03444	4.85705
0.91	0.09	0.7975	0	0	0		1	0	0	0	0		1474.62	625		0.047	0.007		0	1.63951e-21	0		1474.62	-3.39444e-20	0		453.73	33.7912	6.95714	4.85705
0.92	0.08	0.8	0	0	0		1	0	0	0	0		1474.62	625		0.047	0.007		0	-1.78087e-21	0		1474.62	2.90025e-20	0		448.798	33.4239	6.88152	4.85705
0.93	0.07	0.8025	0	0	0		1	0	0	0	0		1474.62	625		0.047	0.007		0	2.46516e-21	0		1474.62	-3.1503e-20	0		443.972	33.0645	6.80753	4.85705
0.94	0.06	0.805	0	0	0		1	0	0	0	0		1474.62	625		0.047	0.007		0	-4.39197e-21	0		1474.62	4.36079e-20	0		439.249	32.7128	6.73511	4.85705
0.95	0.05	0.8075	0	0	0		1	0	0	0	0		1474.62	625		0.047	0.007		0	1.02682e-20	0		1474.62	-7.76927e-20	0		434.625	32.3684	6.66421	4.85705
0.96	0.04	0.81	0	0	0		1	0	0	0	0		1474.62	625		0.047	0.007		0	-3.25751e-20	0		1474.62	1.81641e-19	0		430.098	32.0313	6.59479	4.85705
0.97	0.03	0.8125	0	0	0		1	0	0	0	0		1474.62	625		0.047	0.007		0	1.48648e-19	0		1474.62	-5.76245e-19	0		425.664	31.701	6.5268	4.85705
0.98	0.02	0.815	0	0	0		1	0	0	0	0		1474.62	625		0.047	0.007		0	-1.0918e-18	0		1474.62	2.62954e-18	0		421.32	31.3776	6.4602	4.85705
0.99	0.01	0.8175	0	0	0		1	0	0	0	0		1474.62	625		0.047	0.007		0	1.713e-17	0		1474.62	-1.93136e-17	0		417.065	31.0606	6.39495	4.85705
mantle melting condition				Mineral modes and melting reaction of the mantle							Dmineral/melt for Cu and Zr											S in the mantle sulfides				S, Cu, and Zr in the mantle
fO2(FMQ)					Ol	Opx	Cpx	Sp	Reference		phase	Ol		Opx		Cpx		Sp		Bulk D		composition	S in sulfide(ppm)	S in sulfide(wt%)	Reference	Co (ppm)	Average	uncertainty		Reference
1.2				spinel lherzolite(DMM)	0.57	0.28	0.13	0.02	Workman and Hart (2005)			D	Reference	D	Reference	D	Reference	D	Reference			(Fe,Ni,Cu)S	369000	36.9	Jugo et al. (2005)	S	400	300		estimated
				melting reaction for lherzolite	0.25	-0.51	-0.62	-0.12	Gaetani and Grove (1998)		Zr	0.007	Kelemen (1990)	0.027	McDade et al (2003)	0.103	McDade et al (2003)	0.06	Horn (1994)	Zr	0.02614					Cu	30.75			Salters and Stracke. (2004); Plank and Langmuir (1998)
				melting reaction for harzburgite	-0.19	-0.81			Parman and Grove (2004)		Cu	0.047	Li et al. (2022)	0.0279	Li et al. (2022)	0.0601	Li et al. (2022)	0.15	Li et al. (2022)	Cu	0.045415					Zr	6.331	6.776	5.526	Workman and Hart (2005); Plank and Langmuir (1998)
		Mineral modes (without sulfide)					Mineral modes (with sulfide)									Bulk D			Peridotite residue				instantaneous melt				Aggregated melt
F	Mass of residue	Ol	Opx	Cpx	Sp		Ol	Opx	Cpx	Sp	sulfide		SCSS	DCusulfide/melt		Cu	Zr		S	Cu	Zr		S	Cu	Zr		S	Cu	Zr	Cu/Zr
0	1	0.57	0.28	0.13	0.02		0.569382	0.279696	0.129859	0.0199783	0.00108401		1474.62	625		0.722873	0.0261117		400	30.75	6.331		1474.62
0.01	0.99	0.5725	0.2749	0.1238	0.0188		0.577673	0.277384	0.124919	0.0189699	0.00105459		1474.62	625		0.704364	0.0255379		389.145	30.6326	4.61117		1474.62	42.3762	176.594		1474.62	42.3762	176.594	0.239963
0.02	0.98	0.575	0.2698	0.1176	0.0176		0.586134	0.275024	0.119877	0.0179408	0.00102458		1474.62	625		0.685478	0.0249524		378.069	30.5032	3.32462		1474.62	43.3079	130.693		1474.62	42.842	153.644	0.27884
0.03	0.97	0.5775	0.2647	0.1114	0.0164		0.594769	0.272615	0.114731	0.0168904	0.000993941		1474.62	625		0.666202	0.0243547		366.764	30.361	2.37124		1474.62	44.296	95.8026		1474.62	43.3267	134.363	0.322459
0.04	0.96	0.58	0.2596	0.1052	0.0152		0.603585	0.270156	0.109478	0.0158181	0.000962667		1474.62	625		0.646525	0.0237446		355.224	30.2049	1.67183		1474.62	45.3461	69.5151		1474.62	43.8315	118.151	0.370978
0.05	0.95	0.5825	0.2545	0.099	0.014		0.612587	0.267645	0.104114	0.0147231	0.000930734		1474.62	625		0.626434	0.0231216		343.441	30.0338	1.16422		1474.62	46.4649	49.8946		1474.62	44.3582	104.5	0.424481
0.06	0.94	0.585	0.2494	0.0928	0.0128		0.621781	0.265081	0.0986347	0.0136048	0.000898122		1474.62	625		0.605915	0.0224853		331.407	29.8463	0.800041		1474.62	47.6599	35.3969		1474.62	44.9085	92.9827	0.482977
0.07	0.93	0.5875	0.2443	0.0866	0.0116		0.631174	0.262461	0.0930378	0.0124623	0.000864809		1474.62	625		0.584954	0.0218353		319.115	29.641	0.541983		1474.62	48.9399	24.7994		1474.62	45.4844	83.2422	0.54641
0.08	0.92	0.59	0.2392	0.0804	0.0104		0.640772	0.259784	0.0873187	0.011295	0.000830772		1474.62	625		0.563539	0.0211711		306.555	29.4162	0.361546		1474.62	50.3153	17.1422		1474.62	46.0882	74.9797	0.614676
0.09	0.91	0.5925	0.2341	0.0742	0.0092		0.650581	0.257048	0.0814736	0.0101018	0.000795986		1474.62	625		0.541652	0.0204922		293.719	29.1703	0.237189		1474.62	51.798	11.6781		1474.62	46.7227	67.9462	0.687642
0.1	0.9	0.595	0.229	0.068	0.008		0.660608	0.254251	0.0754981	0.00888213	0.000760427		1474.62	625		0.519279	0.0197983		280.598	28.901	0.15281		1474.62	53.4024	7.83129		1474.62	47.3906	61.9347	0.765171
0.11	0.89	0.5975	0.2239	0.0618	0.0068		0.670862	0.251391	0.0693879	0.00763492	0.00072407		1474.62	625		0.496403	0.0190886		267.182	28.6062	0.0965218		1474.62	55.1456	5.16244		1474.62	48.0956	56.7736	0.847148
0.12	0.88	0.6	0.2188	0.0556	0.0056		0.68135	0.248466	0.0631384	0.00635927	0.000686886		1474.62	625		0.473008	0.0183628		253.461	28.283	0.0596628		1474.62	57.0481	3.34011		1474.62	48.8417	52.3208	0.933504
0.13	0.87	0.6025	0.2137	0.0494	0.0044		0.692079	0.245473	0.0567448	0.00505419	0.000648847		1474.62	625		0.449074	0.0176203		239.424	27.9283	0.0360122		1474.62	59.135	2.11726		1474.62	49.6335	48.459	1.02424
0.14	0.86	0.605	0.2086	0.0432	0.0032		0.703059	0.24241	0.0502019	0.00371866	0.000609923		1474.62	625		0.424584	0.0168604		225.062	27.5387	0.0211728		1474.62	61.4372	1.3122		1474.62	50.4766	45.0914	1.11943
0.15	0.85	0.6075	0.2035	0.037	0.002		0.714298	0.239275	0.0435046	0.0023516	0.000570084		1474.62	625		0.399518	0.0160826		210.361	27.1098	0.0120897		1474.62	63.9931	0.793232		1474.62	51.3777	42.1382	1.21927
0.16	0.84	0.61	0.1984	0.0308	0.0008		0.725806	0.236065	0.0366473	0.000951877	0.000529296		1474.62	625		0.373854	0.0152862		195.31	26.6367	0.00668136		1474.62	66.8516	0.466393		1474.62	52.3448	39.5337	1.32406
0.17	0.83	0.6125	0.1933	0.0246	0		0.737237	0.232666	0.0296098	0	0.000487525		1474.62	625		0.347624	0.0144924		179.897	26.1133	0.00355901		1474.62	70.0752	0.265837		1474.62	53.3878	37.2238	1.43424
0.18	0.82	0.615	0.1882	0.0184	0		0.748207	0.228963	0.0223854	0	0.000444736		1474.62	625		0.320859	0.0137251		164.108	25.5326	0.00181978		1474.62	73.7356	0.146175		1474.62	54.5182	35.1639	1.5504
0.19	0.81	0.6175	0.1831	0.0122	0		0.759415	0.22518	0.0150038	0	0.00040089		1474.62	625		0.293433	0.0129412		147.928	24.8858	0.000889793		1474.62	77.9263	0.0771491		1474.62	55.7502	33.3173	1.67331
0.2	0.8	0.62	0.178	0.006	0		0.77087	0.221314	0.00746003	0	0.000355948		1474.62	625		0.265321	0.01214		131.345	24.1616	0.000413342		1474.62	82.8148	0.0390059		1474.62	57.1034	31.6533	1.80403
0.21	0.79	0.6225	0.1729	0	0		0.782383	0.217308	0	0	0.000309868		1474.62	625		0.236502	0.011344		114.341	23.3458	0.000180948		1474.62	88.6119	0.0187724		1474.62	58.6039	30.1469	1.94394
0.22	0.78	0.625	0.1678	0	0		0.788138	0.211599	0	0	0.000262606		1474.62	625		0.207075	0.0112301		96.9018	22.4191	7.39987e-05		1474.62	95.6258	0.00852302		1474.62	60.2867	28.777	2.09496
0.23	0.77	0.6275	0.1627	0	0		0.793933	0.205853	0	0	0.000214117		1474.62	625		0.176881	0.0111156		79.0093	21.3561	2.94521e-05		1474.62	104.273	0.00350408		1474.62	62.1991	27.526	2.25965
0.24	0.76	0.63	0.1576	0	0		0.799767	0.200069	0	0	0.000164352		1474.62	625		0.145891	0.0110002		60.646	20.1191	1.13898e-05		1474.62	115.368	0.00140219		1474.62	64.4145	26.3791	2.44187
0.25	0.75	0.6325	0.1525	0	0		0.805641	0.194246	0	0	0.00011326		1474.62	625		0.114072	0.0108841		41.793	18.6503	4.27205e-06		1474.62	130.278	0.000545222		1474.62	67.049	25.324	2.64765
0.26	0.74	0.635	0.1474	0	0		0.811556	0.188383	0	0	6.07871e-05		1474.62	625		0.081391	0.0107672		22.4305	16.8522	1.55098e-06		1474.62	151.713	0.000205631		1474.62	70.3053	24.35	2.88728
0.27	0.73	0.6375	0.1423	0	0		0.817512	0.182481	0	0	6.8765e-06		1474.62	625		0.0478121	0.0106496		2.53743	14.5344	5.43825e-07		1474.62	186.053	7.50731e-05		1474.62	74.5923	23.4481	3.18116
0.28	0.72	0.64	0.1372	0	0		0.823469	0.176531	0	0	0		1474.62	625		0.0436283	0.0105306		0	11.2153	1.83706e-07		1474.62	253.503	2.64724e-05		1474.62	80.982	22.6107	3.58158
0.29	0.71	0.6425	0.1321	0	0		0.82946	0.17054	0	0	0		1474.62	625		0.0437427	0.0104108		0	8.40363	5.96168e-08		1474.62	210.846	8.99402e-06		1423.77	85.4601	21.831	3.91461
0.3	0.7	0.645	0.127	0	0		0.835492	0.164508	0	0	0		1474.62	625		0.0438579	0.0102902		0	6.27153	1.85282e-08		1474.62	157.651	2.93582e-06		1376.31	87.8664	21.1033	4.16363
0.31	0.69	0.6475	0.1219	0	0		0.841565	0.158435	0	0	0		1474.62	625		0.0439739	0.0101687		0	4.66094	5.49502e-09		1474.62	117.402	9.17815e-07		1331.92	88.8192	20.4226	4.34907
0.32	0.68	0.65	0.1168	0	0		0.847679	0.152321	0	0	0		1474.62	625		0.0440907	0.0100464		0	3.44912	1.54887e-09		1474.62	87.0648	2.73833e-07		1290.29	88.7644	19.7844	4.48659
0.33	0.67	0.6525	0.1117	0	0		0.853834	0.146166	0	0	0		1474.62	625		0.0442082	0.00992332		0	2.54105	4.12982e-10		1474.62	64.2896	7.76531e-08		1251.19	88.0227	19.1848	4.58814
0.34	0.66	0.655	0.1066	0	0		0.860032	0.139968	0	0	0		1474.62	625		0.0443266	0.00979937		0	1.86348	1.03598e-10		1474.62	47.2612	2.08323e-08		1214.39	86.8238	18.6206	4.66279
0.35	0.65	0.6575	0.1015	0	0		0.866271	0.133729	0	0	0		1474.62	625		0.0444458	0.00967457		0	1.36009	2.42931e-11		1474.62	34.5835	5.25841e-09		1179.7	85.3313	18.0886	4.71741
0.36	0.64	0.66	0.0964	0	0		0.872554	0.127446	0	0	0		1474.62	625		0.0445658	0.00954892		0	0.987807	5.28443e-12		1474.62	25.1862	1.24085e-09		1146.93	83.6606	17.5861	4.7572
0.37	0.63	0.6625	0.0913	0	0		0.87888	0.12112	0	0	0		1474.62	625		0.0446866	0.00942239		0	0.71377	1.05648e-12		1474.62	18.2521	2.71645e-10		1115.93	81.8928	17.1108	4.78603
0.38	0.62	0.665	0.0862	0	0		0.88525	0.11475	0	0	0		1474.62	625		0.0448083	0.00929499		0	0.513032	1.91906e-13		1474.62	13.1595	5.46602e-11		1086.56	80.084	16.6605	4.80681
0.39	0.61	0.6675	0.0811	0	0		0.891664	0.108336	0	0	0		1474.62	625		0.0449308	0.00916671		0	0.366727	3.12152e-14		1474.62	9.43764	9.99402e-12		1058.7	78.2726	16.2333	4.82172
0.4	0.6	0.67	0.076	0	0		0.898123	0.101877	0	0	0		1474.62	625		0.0450542	0.00903753		0	0.260652	4.46142e-15		1474.62	6.73122	1.63644e-12		1032.23	76.484	15.8275	4.83235
0.41	0.59	0.6725	0.0709	0	0		0.904627	0.0953726	0	0	0		1474.62	625		0.0451784	0.00890745		0	0.184162	5.46081e-16		1474.62	4.77353	2.35467e-13		1007.06	74.735	15.4415	4.83989
0.42	0.58	0.675	0.0658	0	0		0.911177	0.0888229	0	0	0		1474.62	625		0.0453035	0.00877646		0	0.129318	5.51773e-17		1474.62	3.36514	2.90185e-14		983.081	73.0357	15.0738	4.84521
0.43	0.57	0.6775	0.0607	0	0		0.917773	0.082227	0	0	0		1474.62	625		0.0454295	0.00864454		0	0.0902246	4.34808e-18		1474.62	2.35765	2.95244e-15		960.218	71.392	14.7233	4.84893
0.44	0.56	0.68	0.0556	0	0		0.924415	0.0755846	0	0	0		1474.62	625		0.0455563	0.00851169		0	0.0625288	2.41874e-19		1474.62	1.64119	2.34296e-16		938.395	69.8068	14.3886	4.85152
0.45	0.55	0.6825	0.0505	0	0		0.931105	0.068895	0	0	0		1474.62	625		0.0456841	0.0083779		0	0.0430328	7.61048e-21		1474.62	1.13481	1.31264e-17		917.542	68.2807	14.0689	4.85331
0.46	0.54	0.685	0.0454	0	0		0.937842	0.0621577	0	0	0		1474.62	625		0.0458128	0.00824315		0	0.0294002	4.75835e-23		1474.62	0.779195	4.16007e-19		897.595	66.8133	13.763	4.85454
0.47	0.53	0.6875	0.0403	0	0		0.944628	0.0553724	0	0	0		1474.62	625		0.0459424	0.00810745		0	0.0199337	0		1474.62	0.531124	2.62013e-21		878.498	65.4031	13.4702	4.85538
0.48	0.52	0.69	0.0352	0	0		0.951462	0.0485383	0	0	0		1474.62	625		0.0460729	0.00797077		0	0.0134079	0		1474.62	0.359276	0		860.196	64.048	13.1896	4.85595
0.49	0.51	0.6925	0.0301	0	0		0.958345	0.0416551	0	0	0		1474.62	625		0.0462044	0.0078331		0	0.00894341	0		1474.62	0.241096	0		842.641	62.7458	12.9204	4.85633
0.5	0.5	0.695	0.025	0	0		0.965278	0.0347222	0	0	0		1474.62	625		0.0463368	0.00769444		0	0.00591344	0		1474.62	0.160442	0		825.788	61.4941	12.662	4.85659
0.51	0.49	0.6975	0.0199	0	0		0.972261	0.0277391	0	0	0		1474.62	625		0.0464702	0.00755478		0	0.0038742	0		1474.62	0.105836	0		809.596	60.2904	12.4137	4.85675
0.52	0.48	0.7	0.0148	0	0		0.979295	0.0207051	0	0	0		1474.62	625		0.0466045	0.0074141		0	0.00251376	0		1474.62	0.0691753	0		794.027	59.1323	12.175	4.85686
0.53	0.47	0.7025	0.0097	0	0		0.98638	0.0136198	0	0	0		1474.62	625		0.0467399	0.0072724		0	0.00161452	0		1474.62	0.0447778	0		779.045	58.0174	11.9453	4.85693
0.54	0.46	0.705	0.0046	0	0		0.993517	0.00648253	0	0	0		1474.62	625		0.0468762	0.00712965		0	0.0010259	0		1474.62	0.0286912	0		764.618	56.9436	11.7241	4.85698
0.55	0.45	0.7075	0	0	0		1	0	0	0	0		1474.62	625		0.047	0.007		0	0.000644535	0		1474.62	0.0181873	0		750.716	55.9086	11.5109	4.85701
0.56	0.44	0.71	0	0	0		1	0	0	0	0		1474.62	625		0.047	0.007		0	0.000400055	0		1474.62	0.0114016	0		737.311	54.9104	11.3054	4.85702
0.57	0.43	0.7125	0	0	0		1	0	0	0	0		1474.62	625		0.047	0.007		0	0.00024478	0		1474.62	0.00707686	0		724.375	53.9472	11.107	4.85704
0.58	0.42	0.715	0	0	0		1	0	0	0	0		1474.62	625		0.047	0.007		0	0.000147511	0		1474.62	0.0043301	0		711.886	53.0171	10.9155	4.85704
0.59	0.41	0.7175	0	0	0		1	0	0	0	0		1474.62	625		0.047	0.007		0	8.74642e-05	0		1474.62	0.00260943	0		699.82	52.1186	10.7305	4.85705
0.6	0.4	0.72	0	0	0		1	0	0	0	0		1474.62	625		0.047	0.007		0	5.09704e-05	0		1474.62	0.00154722	0		688.156	51.25	10.5517	4.85705
0.61	0.39	0.7225	0	0	0		1	0	0	0	0		1474.62	625		0.047	0.007		0	2.9158e-05	0		1474.62	0.000901652	0		676.875	50.4098	10.3787	4.85705
0.62	0.38	0.725	0	0	0		1	0	0	0	0		1474.62	625		0.047	0.007		0	1.63517e-05	0		1474.62	0.000515798	0		665.958	49.5968	10.2113	4.85705
0.63	0.37	0.7275	0	0	0		1	0	0	0	0		1474.62	625		0.047	0.007		0	8.9759e-06	0		1474.62	0.000289258	0		655.387	48.8095	10.0492	4.85705
0.64	0.36	0.73	0	0	0		1	0	0	0	0		1474.62	625		0.047	0.007		0	4.81464e-06	0		1474.62	0.000158781	0		645.147	48.0469	9.89219	4.85705
0.65	0.35	0.7325	0	0	0		1	0	0	0	0		1474.62	625		0.047	0.007		0	2.51878e-06	0		1474.62	8.51697e-05	0		635.221	47.3077	9.74	4.85705
0.66	0.34	0.735	0	0	0		1	0	0	0	0		1474.62	625		0.047	0.007		0	1.28238e-06	0		1474.62	4.45566e-05	0		625.597	46.5909	9.59242	4.85705
0.67	0.33	0.7375	0	0	0		1	0	0	0	0		1474.62	625		0.047	0.007		0	6.33816e-07	0		1474.62	2.26849e-05	0		616.26	45.8955	9.44925	4.85705
0.68	0.32	0.74	0	0	0		1	0	0	0	0		1474.62	625		0.047	0.007		0	3.03247e-07	0		1474.62	1.1212e-05	0		607.197	45.2206	9.31029	4.85705
0.69	0.31	0.7425	0	0	0		1	0	0	0	0		1474.62	625		0.047	0.007		0	1.39985e-07	0		1474.62	5.36435e-06	0		598.397	44.5652	9.17536	4.85705
0.7	0.3	0.745	0	0	0		1	0	0	0	0		1474.62	625		0.047	0.007		0	6.21082e-08	0		1474.62	2.4763e-06	0		589.848	43.9286	9.04429	4.85705
0.71	0.29	0.7475	0	0	0		1	0	0	0	0		1474.62	625		0.047	0.007		0	2.63644e-08	0		1474.62	1.09868e-06	0		581.541	43.3099	8.9169	4.85705
0.72	0.28	0.75	0	0	0		1	0	0	0	0		1474.62	625		0.047	0.007		0	1.06496e-08	0		1474.62	4.6638e-07	0		573.464	42.7083	8.79306	4.85705
0.73	0.27	0.7525	0	0	0		1	0	0	0	0		1474.62	625		0.047	0.007		0	4.06668e-09	0		1474.62	1.88389e-07	0		565.608	42.1233	8.6726	4.85705
0.74	0.26	0.755	0	0	0		1	0	0	0	0		1474.62	625		0.047	0.007		0	1.45623e-09	0		1474.62	7.19385e-08	0		557.965	41.5541	8.55541	4.85705
0.75	0.25	0.7575	0	0	0		1	0	0	0	0		1474.62	625		0.047	0.007		0	4.84067e-10	0		1474.62	2.57603e-08	0		550.525	41	8.44133	4.85705
0.76	0.24	0.76	0	0	0		1	0	0	0	0		1474.62	625		0.047	0.007		0	1.47444e-10	0		1474.62	8.56301e-09	0		543.281	40.4605	8.33026	4.85705
0.77	0.23	0.7625	0	0	0		1	0	0	0	0		1474.62	625		0.047	0.007		0	4.04528e-11	0		1474.62	2.60825e-09	0		536.226	39.9351	8.22208	4.85705
0.78	0.22	0.765	0	0	0		1	0	0	0	0		1474.62	625		0.047	0.007		0	9.76434e-12	0		1474.62	7.15599e-10	0		529.351	39.4231	8.11667	4.85705
0.79	0.21	0.7675	0	0	0		1	0	0	0	0		1474.62	625		0.047	0.007		0	2.00414e-12	0		1474.62	1.72729e-10	0		522.65	38.9241	8.01392	4.85705
0.8	0.2	0.77	0	0	0		1	0	0	0	0		1474.62	625		0.047	0.007		0	3.31714e-13	0		1474.62	3.54528e-11	0		516.117	38.4375	7.91375	4.85705
0.81	0.19	0.7725	0	0	0		1	0	0	0	0		1474.62	625		0.047	0.007		0	4.03343e-14	0		1474.62	5.86792e-12	0		509.746	37.963	7.81605	4.85705
0.82	0.18	0.775	0	0	0		1	0	0	0	0		1474.62	625		0.047	0.007		0	2.93606e-15	0		1474.62	7.13502e-13	0		503.529	37.5	7.72073	4.85705
0.83	0.17	0.7775	0	0	0		1	0	0	0	0		1474.62	625		0.047	0.007		0	5.35879e-17	0		1474.62	5.19381e-14	0		497.463	37.0482	7.62771	4.85705
0.84	0.16	0.78	0	0	0		1	0	0	0	0		1474.62	625		0.047	0.007		0	-2.31005e-18	0		1474.62	9.47955e-16	0		491.54	36.6071	7.5369	4.85705
0.85	0.15	0.7825	0	0	0		1	0	0	0	0		1474.62	625		0.047	0.007		0	2.60223e-19	0		1474.62	-4.08641e-17	0		485.758	36.1765	7.44824	4.85705
0.86	0.14	0.785	0	0	0		1	0	0	0	0		1474.62	625		0.047	0.007		0	-4.99947e-20	0		1474.62	4.60326e-18	0		480.109	35.7558	7.36163	4.85705
0.87	0.13	0.7875	0	0	0		1	0	0	0	0		1474.62	625		0.047	0.007		0	1.41897e-20	0		1474.62	-8.84393e-19	0		474.591	35.3448	7.27701	4.85705
0.88	0.12	0.79	0	0	0		1	0	0	0	0		1474.62	625		0.047	0.007		0	-5.5455e-21	0		1474.62	2.51013e-19	0		469.198	34.9432	7.19432	4.85705
0.89	0.11	0.7925	0	0	0		1	0	0	0	0		1474.62	625		0.047	0.007		0	2.86839e-21	0		1474.62	-9.80983e-20	0		463.926	34.5506	7.11348	4.85705
0.9	0.1	0.795	0	0	0		1	0	0	0	0		1474.62	625		0.047	0.007		0	-1.91888e-21	0		1474.62	5.07411e-20	0		458.771	34.1667	7.03444	4.85705
0.91	0.09	0.7975	0	0	0		1	0	0	0	0		1474.62	625		0.047	0.007		0	1.63951e-21	0		1474.62	-3.39444e-20	0		453.73	33.7912	6.95714	4.85705
0.92	0.08	0.8	0	0	0		1	0	0	0	0		1474.62	625		0.047	0.007		0	-1.78087e-21	0		1474.62	2.90025e-20	0		448.798	33.4239	6.88152	4.85705
0.93	0.07	0.8025	0	0	0		1	0	0	0	0		1474.62	625		0.047	0.007		0	2.46516e-21	0		1474.62	-3.1503e-20	0		443.972	33.0645	6.80753	4.85705
0.94	0.06	0.805	0	0	0		1	0	0	0	0		1474.62	625		0.047	0.007		0	-4.39197e-21	0		1474.62	4.36079e-20	0		439.249	32.7128	6.73511	4.85705
0.95	0.05	0.8075	0	0	0		1	0	0	0	0		1474.62	625		0.047	0.007		0	1.02682e-20	0		1474.62	-7.76927e-20	0		434.625	32.3684	6.66421	4.85705
0.96	0.04	0.81	0	0	0		1	0	0	0	0		1474.62	625		0.047	0.007		0	-3.25751e-20	0		1474.62	1.81641e-19	0		430.098	32.0313	6.59479	4.85705
0.97	0.03	0.8125	0	0	0		1	0	0	0	0		1474.62	625		0.047	0.007		0	1.48648e-19	0		1474.62	-5.76245e-19	0		425.664	31.701	6.5268	4.85705
0.98	0.02	0.815	0	0	0		1	0	0	0	0		1474.62	625		0.047	0.007		0	-1.0918e-18	0		1474.62	2.62954e-18	0		421.32	31.3776	6.4602	4.85705
0.99	0.01	0.8175	0	0	0		1	0	0	0	0		1474.62	625		0.047	0.007		0	1.713e-17	0		1474.62	-1.93136e-17	0		417.065	31.0606	6.39495	4.85705
mantle melting condition				Mineral modes and melting reaction of the mantle							Dmineral/melt for Cu and Zr											S in the mantle sulfides				S, Cu, and Zr in the mantle
fO2(FMQ)					Ol	Opx	Cpx	Sp	Reference		phase	Ol		Opx		Cpx		Sp		Bulk D		composition	S in sulfide(ppm)	S in sulfide(wt%)	Reference	Co (ppm)	Average	uncertainty		Reference
1.3				spinel lherzolite(DMM)	0.57	0.28	0.13	0.02	Workman and Hart (2005)			D	Reference	D	Reference	D	Reference	D	Reference			(Fe,Ni,Cu)S	369000	36.9	Jugo et al. (2005)	S	400	300		estimated
				melting reaction for lherzolite	0.25	-0.51	-0.62	-0.12	Gaetani and Grove (1998)		Zr	0.007	Kelemen (1990)	0.027	McDade et al (2003)	0.103	McDade et al (2003)	0.06	Horn (1994)	Zr	0.02614					Cu	30.75			Salters and Stracke. (2004); Plank and Langmuir (1998)
				melting reaction for harzburgite	-0.19	-0.81			Parman and Grove (2004)		Cu	0.047	Li et al. (2022)	0.0279	Li et al. (2022)	0.0601	Li et al. (2022)	0.15	Li et al. (2022)	Cu	0.045415					Zr	6.331	6.776	5.526	Workman and Hart (2005); Plank and Langmuir (1998)
		Mineral modes (without sulfide)					Mineral modes (with sulfide)									Bulk D			Peridotite residue				instantaneous melt				Aggregated melt
F	Mass of residue	Ol	Opx	Cpx	Sp		Ol	Opx	Cpx	Sp	sulfide		SCSS	DCusulfide/melt		Cu	Zr		S	Cu	Zr		S	cu	Zr		S	Cu	Zr	Cu/Zr
0	1	0.57	0.28	0.13	0.02		0.569382	0.279696	0.129859	0.0199783	0.00108401		1474.62	625		0.722873	0.0261117		400	30.75	6.331		1474.62
0.01	0.99	0.5725	0.2749	0.1238	0.0188		0.577673	0.277384	0.124919	0.0189699	0.00105459		1474.62	625		0.704364	0.0255379		389.145	30.6326	4.61117		1474.62	42.3762	176.594		1474.62	42.3762	176.594	0.239963
0.02	0.98	0.575	0.2698	0.1176	0.0176		0.586134	0.275024	0.119877	0.0179408	0.00102458		1474.62	625		0.685478	0.0249524		378.069	30.5032	3.32462		1474.62	43.3079	130.693		1474.62	42.842	153.644	0.27884
0.03	0.97	0.5775	0.2647	0.1114	0.0164		0.594769	0.272615	0.114731	0.0168904	0.000993941		1474.62	625		0.666202	0.0243547		366.764	30.361	2.37124		1474.62	44.296	95.8026		1474.62	43.3267	134.363	0.322459
0.04	0.96	0.58	0.2596	0.1052	0.0152		0.603585	0.270156	0.109478	0.0158181	0.000962667		1474.62	625		0.646525	0.0237446		355.224	30.2049	1.67183		1474.62	45.3461	69.5151		1474.62	43.8315	118.151	0.370978
0.05	0.95	0.5825	0.2545	0.099	0.014		0.612587	0.267645	0.104114	0.0147231	0.000930734		1474.62	625		0.626434	0.0231216		343.441	30.0338	1.16422		1474.62	46.4649	49.8946		1474.62	44.3582	104.5	0.424481
0.06	0.94	0.585	0.2494	0.0928	0.0128		0.621781	0.265081	0.0986347	0.0136048	0.000898122		1474.62	625		0.605915	0.0224853		331.407	29.8463	0.800041		1474.62	47.6599	35.3969		1474.62	44.9085	92.9827	0.482977
0.07	0.93	0.5875	0.2443	0.0866	0.0116		0.631174	0.262461	0.0930378	0.0124623	0.000864809		1474.62	625		0.584954	0.0218353		319.115	29.641	0.541983		1474.62	48.9399	24.7994		1474.62	45.4844	83.2422	0.54641
0.08	0.92	0.59	0.2392	0.0804	0.0104		0.640772	0.259784	0.0873187	0.011295	0.000830772		1474.62	625		0.563539	0.0211711		306.555	29.4162	0.361546		1474.62	50.3153	17.1422		1474.62	46.0882	74.9797	0.614676
0.09	0.91	0.5925	0.2341	0.0742	0.0092		0.650581	0.257048	0.0814736	0.0101018	0.000795986		1474.62	625		0.541652	0.0204922		293.719	29.1703	0.237189		1474.62	51.798	11.6781		1474.62	46.7227	67.9462	0.687642
0.1	0.9	0.595	0.229	0.068	0.008		0.660608	0.254251	0.0754981	0.00888213	0.000760427		1474.62	625		0.519279	0.0197983		280.598	28.901	0.15281		1474.62	53.4024	7.83129		1474.62	47.3906	61.9347	0.765171
0.11	0.89	0.5975	0.2239	0.0618	0.0068		0.670862	0.251391	0.0693879	0.00763492	0.00072407		1474.62	625		0.496403	0.0190886		267.182	28.6062	0.0965218		1474.62	55.1456	5.16244		1474.62	48.0956	56.7736	0.847148
0.12	0.88	0.6	0.2188	0.0556	0.0056		0.68135	0.248466	0.0631384	0.00635927	0.000686886		1474.62	625		0.473008	0.0183628		253.461	28.283	0.0596628		1474.62	57.0481	3.34011		1474.62	48.8417	52.3208	0.933504
0.13	0.87	0.6025	0.2137	0.0494	0.0044		0.692079	0.245473	0.0567448	0.00505419	0.000648847		1474.62	625		0.449074	0.0176203		239.424	27.9283	0.0360122		1474.62	59.135	2.11726		1474.62	49.6335	48.459	1.02424
0.14	0.86	0.605	0.2086	0.0432	0.0032		0.703059	0.24241	0.0502019	0.00371866	0.000609923		1474.62	625		0.424584	0.0168604		225.062	27.5387	0.0211728		1474.62	61.4372	1.3122		1474.62	50.4766	45.0914	1.11943
0.15	0.85	0.6075	0.2035	0.037	0.002		0.714298	0.239275	0.0435046	0.0023516	0.000570084		1474.62	625		0.399518	0.0160826		210.361	27.1098	0.0120897		1474.62	63.9931	0.793232		1474.62	51.3777	42.1382	1.21927
0.16	0.84	0.61	0.1984	0.0308	0.0008		0.725806	0.236065	0.0366473	0.000951877	0.000529296		1474.62	625		0.373854	0.0152862		195.31	26.6367	0.00668136		1474.62	66.8516	0.466393		1474.62	52.3448	39.5337	1.32406
0.17	0.83	0.6125	0.1933	0.0246	0		0.737237	0.232666	0.0296098	0	0.000487525		1474.62	625		0.347624	0.0144924		179.897	26.1133	0.00355901		1474.62	70.0752	0.265837		1474.62	53.3878	37.2238	1.43424
0.18	0.82	0.615	0.1882	0.0184	0		0.748207	0.228963	0.0223854	0	0.000444736		1474.62	625		0.320859	0.0137251		164.108	25.5326	0.00181978		1474.62	73.7356	0.146175		1474.62	54.5182	35.1639	1.5504
0.19	0.81	0.6175	0.1831	0.0122	0		0.759415	0.22518	0.0150038	0	0.00040089		1474.62	625		0.293433	0.0129412		147.928	24.8858	0.000889793		1474.62	77.9263	0.0771491		1474.62	55.7502	33.3173	1.67331
0.2	0.8	0.62	0.178	0.006	0		0.77087	0.221314	0.00746003	0	0.000355948		1474.62	625		0.265321	0.01214		131.345	24.1616	0.000413342		1474.62	82.8148	0.0390059		1474.62	57.1034	31.6533	1.80403
0.21	0.79	0.6225	0.1729	0	0		0.782383	0.217308	0	0	0.000309868		1474.62	625		0.236502	0.011344		114.341	23.3458	0.000180948		1474.62	88.6119	0.0187724		1474.62	58.6039	30.1469	1.94394
0.22	0.78	0.625	0.1678	0	0		0.788138	0.211599	0	0	0.000262606		1474.62	625		0.207075	0.0112301		96.9018	22.4191	7.39987e-05		1474.62	95.6258	0.00852302		1474.62	60.2867	28.777	2.09496
0.23	0.77	0.6275	0.1627	0	0		0.793933	0.205853	0	0	0.000214117		1474.62	625		0.176881	0.0111156		79.0093	21.3561	2.94521e-05		1474.62	104.273	0.00350408		1474.62	62.1991	27.526	2.25965
0.24	0.76	0.63	0.1576	0	0		0.799767	0.200069	0	0	0.000164352		1474.62	625		0.145891	0.0110002		60.646	20.1191	1.13898e-05		1474.62	115.368	0.00140219		1474.62	64.4145	26.3791	2.44187
0.25	0.75	0.6325	0.1525	0	0		0.805641	0.194246	0	0	0.00011326		1474.62	625		0.114072	0.0108841		41.793	18.6503	4.27205e-06		1474.62	130.278	0.000545222		1474.62	67.049	25.324	2.64765
0.26	0.74	0.635	0.1474	0	0		0.811556	0.188383	0	0	6.07871e-05		1474.62	625		0.081391	0.0107672		22.4305	16.8522	1.55098e-06		1474.62	151.713	0.000205631		1474.62	70.3053	24.35	2.88728
0.27	0.73	0.6375	0.1423	0	0		0.817512	0.182481	0	0	6.8765e-06		1474.62	625		0.0478121	0.0106496		2.53743	14.5344	5.43825e-07		1474.62	186.053	7.50731e-05		1474.62	74.5923	23.4481	3.18116
0.28	0.72	0.64	0.1372	0	0		0.823469	0.176531	0	0	0		1474.62	625		0.0436283	0.0105306		0	11.2153	1.83706e-07		1474.62	253.503	2.64724e-05		1474.62	80.982	22.6107	3.58158
0.29	0.71	0.6425	0.1321	0	0		0.82946	0.17054	0	0	0		1474.62	625		0.0437427	0.0104108		0	8.40363	5.96168e-08		1474.62	210.846	8.99402e-06		1423.77	85.4601	21.831	3.91461
0.3	0.7	0.645	0.127	0	0		0.835492	0.164508	0	0	0		1474.62	625		0.0438579	0.0102902		0	6.27153	1.85282e-08		1474.62	157.651	2.93582e-06		1376.31	87.8664	21.1033	4.16363
0.31	0.69	0.6475	0.1219	0	0		0.841565	0.158435	0	0	0		1474.62	625		0.0439739	0.0101687		0	4.66094	5.49502e-09		1474.62	117.402	9.17815e-07		1331.92	88.8192	20.4226	4.34907
0.32	0.68	0.65	0.1168	0	0		0.847679	0.152321	0	0	0		1474.62	625		0.0440907	0.0100464		0	3.44912	1.54887e-09		1474.62	87.0648	2.73833e-07		1290.29	88.7644	19.7844	4.48659
0.33	0.67	0.6525	0.1117	0	0		0.853834	0.146166	0	0	0		1474.62	625		0.0442082	0.00992332		0	2.54105	4.12982e-10		1474.62	64.2896	7.76531e-08		1251.19	88.0227	19.1848	4.58814
0.34	0.66	0.655	0.1066	0	0		0.860032	0.139968	0	0	0		1474.62	625		0.0443266	0.00979937		0	1.86348	1.03598e-10		1474.62	47.2612	2.08323e-08		1214.39	86.8238	18.6206	4.66279
0.35	0.65	0.6575	0.1015	0	0		0.866271	0.133729	0	0	0		1474.62	625		0.0444458	0.00967457		0	1.36009	2.42931e-11		1474.62	34.5835	5.25841e-09		1179.7	85.3313	18.0886	4.71741
0.36	0.64	0.66	0.0964	0	0		0.872554	0.127446	0	0	0		1474.62	625		0.0445658	0.00954892		0	0.987807	5.28443e-12		1474.62	25.1862	1.24085e-09		1146.93	83.6606	17.5861	4.7572
0.37	0.63	0.6625	0.0913	0	0		0.87888	0.12112	0	0	0		1474.62	625		0.0446866	0.00942239		0	0.71377	1.05648e-12		1474.62	18.2521	2.71645e-10		1115.93	81.8928	17.1108	4.78603
0.38	0.62	0.665	0.0862	0	0		0.88525	0.11475	0	0	0		1474.62	625		0.0448083	0.00929499		0	0.513032	1.91906e-13		1474.62	13.1595	5.46602e-11		1086.56	80.084	16.6605	4.80681
0.39	0.61	0.6675	0.0811	0	0		0.891664	0.108336	0	0	0		1474.62	625		0.0449308	0.00916671		0	0.366727	3.12152e-14		1474.62	9.43764	9.99402e-12		1058.7	78.2726	16.2333	4.82172
0.4	0.6	0.67	0.076	0	0		0.898123	0.101877	0	0	0		1474.62	625		0.0450542	0.00903753		0	0.260652	4.46142e-15		1474.62	6.73122	1.63644e-12		1032.23	76.484	15.8275	4.83235
0.41	0.59	0.6725	0.0709	0	0		0.904627	0.0953726	0	0	0		1474.62	625		0.0451784	0.00890745		0	0.184162	5.46081e-16		1474.62	4.77353	2.35467e-13		1007.06	74.735	15.4415	4.83989
0.42	0.58	0.675	0.0658	0	0		0.911177	0.0888229	0	0	0		1474.62	625		0.0453035	0.00877646		0	0.129318	5.51773e-17		1474.62	3.36514	2.90185e-14		983.081	73.0357	15.0738	4.84521
0.43	0.57	0.6775	0.0607	0	0		0.917773	0.082227	0	0	0		1474.62	625		0.0454295	0.00864454		0	0.0902246	4.34808e-18		1474.62	2.35765	2.95244e-15		960.218	71.392	14.7233	4.84893
0.44	0.56	0.68	0.0556	0	0		0.924415	0.0755846	0	0	0		1474.62	625		0.0455563	0.00851169		0	0.0625288	2.41874e-19		1474.62	1.64119	2.34296e-16		938.395	69.8068	14.3886	4.85152
0.45	0.55	0.6825	0.0505	0	0		0.931105	0.068895	0	0	0		1474.62	625		0.0456841	0.0083779		0	0.0430328	7.61048e-21		1474.62	1.13481	1.31264e-17		917.542	68.2807	14.0689	4.85331
0.46	0.54	0.685	0.0454	0	0		0.937842	0.0621577	0	0	0		1474.62	625		0.0458128	0.00824315		0	0.0294002	4.75835e-23		1474.62	0.779195	4.16007e-19		897.595	66.8133	13.763	4.85454
0.47	0.53	0.6875	0.0403	0	0		0.944628	0.0553724	0	0	0		1474.62	625		0.0459424	0.00810745		0	0.0199337	0		1474.62	0.531124	2.62013e-21		878.498	65.4031	13.4702	4.85538
0.48	0.52	0.69	0.0352	0	0		0.951462	0.0485383	0	0	0		1474.62	625		0.0460729	0.00797077		0	0.0134079	0		1474.62	0.359276	0		860.196	64.048	13.1896	4.85595
0.49	0.51	0.6925	0.0301	0	0		0.958345	0.0416551	0	0	0		1474.62	625		0.0462044	0.0078331		0	0.00894341	0		1474.62	0.241096	0		842.641	62.7458	12.9204	4.85633
0.5	0.5	0.695	0.025	0	0		0.965278	0.0347222	0	0	0		1474.62	625		0.0463368	0.00769444		0	0.00591344	0		1474.62	0.160442	0		825.788	61.4941	12.662	4.85659
0.51	0.49	0.6975	0.0199	0	0		0.972261	0.0277391	0	0	0		1474.62	625		0.0464702	0.00755478		0	0.0038742	0		1474.62	0.105836	0		809.596	60.2904	12.4137	4.85675
0.52	0.48	0.7	0.0148	0	0		0.979295	0.0207051	0	0	0		1474.62	625		0.0466045	0.0074141		0	0.00251376	0		1474.62	0.0691753	0		794.027	59.1323	12.175	4.85686
0.53	0.47	0.7025	0.0097	0	0		0.98638	0.0136198	0	0	0		1474.62	625		0.0467399	0.0072724		0	0.00161452	0		1474.62	0.0447778	0		779.045	58.0174	11.9453	4.85693
0.54	0.46	0.705	0.0046	0	0		0.993517	0.00648253	0	0	0		1474.62	625		0.0468762	0.00712965		0	0.0010259	0		1474.62	0.0286912	0		764.618	56.9436	11.7241	4.85698
0.55	0.45	0.7075	0	0	0		1	0	0	0	0		1474.62	625		0.047	0.007		0	0.000644535	0		1474.62	0.0181873	0		750.716	55.9086	11.5109	4.85701
0.56	0.44	0.71	0	0	0		1	0	0	0	0		1474.62	625		0.047	0.007		0	0.000400055	0		1474.62	0.0114016	0		737.311	54.9104	11.3054	4.85702
0.57	0.43	0.7125	0	0	0		1	0	0	0	0		1474.62	625		0.047	0.007		0	0.00024478	0		1474.62	0.00707686	0		724.375	53.9472	11.107	4.85704
0.58	0.42	0.715	0	0	0		1	0	0	0	0		1474.62	625		0.047	0.007		0	0.000147511	0		1474.62	0.0043301	0		711.886	53.0171	10.9155	4.85704
0.59	0.41	0.7175	0	0	0		1	0	0	0	0		1474.62	625		0.047	0.007		0	8.74642e-05	0		1474.62	0.00260943	0		699.82	52.1186	10.7305	4.85705
0.6	0.4	0.72	0	0	0		1	0	0	0	0		1474.62	625		0.047	0.007		0	5.09704e-05	0		1474.62	0.00154722	0		688.156	51.25	10.5517	4.85705
0.61	0.39	0.7225	0	0	0		1	0	0	0	0		1474.62	625		0.047	0.007		0	2.9158e-05	0		1474.62	0.000901652	0		676.875	50.4098	10.3787	4.85705
0.62	0.38	0.725	0	0	0		1	0	0	0	0		1474.62	625		0.047	0.007		0	1.63517e-05	0		1474.62	0.000515798	0		665.958	49.5968	10.2113	4.85705
0.63	0.37	0.7275	0	0	0		1	0	0	0	0		1474.62	625		0.047	0.007		0	8.9759e-06	0		1474.62	0.000289258	0		655.387	48.8095	10.0492	4.85705
0.64	0.36	0.73	0	0	0		1	0	0	0	0		1474.62	625		0.047	0.007		0	4.81464e-06	0		1474.62	0.000158781	0		645.147	48.0469	9.89219	4.85705
0.65	0.35	0.7325	0	0	0		1	0	0	0	0		1474.62	625		0.047	0.007		0	2.51878e-06	0		1474.62	8.51697e-05	0		635.221	47.3077	9.74	4.85705
0.66	0.34	0.735	0	0	0		1	0	0	0	0		1474.62	625		0.047	0.007		0	1.28238e-06	0		1474.62	4.45566e-05	0		625.597	46.5909	9.59242	4.85705
0.67	0.33	0.7375	0	0	0		1	0	0	0	0		1474.62	625		0.047	0.007		0	6.33816e-07	0		1474.62	2.26849e-05	0		616.26	45.8955	9.44925	4.85705
0.68	0.32	0.74	0	0	0		1	0	0	0	0		1474.62	625		0.047	0.007		0	3.03247e-07	0		1474.62	1.1212e-05	0		607.197	45.2206	9.31029	4.85705
0.69	0.31	0.7425	0	0	0		1	0	0	0	0		1474.62	625		0.047	0.007		0	1.39985e-07	0		1474.62	5.36435e-06	0		598.397	44.5652	9.17536	4.85705
0.7	0.3	0.745	0	0	0		1	0	0	0	0		1474.62	625		0.047	0.007		0	6.21082e-08	0		1474.62	2.4763e-06	0		589.848	43.9286	9.04429	4.85705
0.71	0.29	0.7475	0	0	0		1	0	0	0	0		1474.62	625		0.047	0.007		0	2.63644e-08	0		1474.62	1.09868e-06	0		581.541	43.3099	8.9169	4.85705
0.72	0.28	0.75	0	0	0		1	0	0	0	0		1474.62	625		0.047	0.007		0	1.06496e-08	0		1474.62	4.6638e-07	0		573.464	42.7083	8.79306	4.85705
0.73	0.27	0.7525	0	0	0		1	0	0	0	0		1474.62	625		0.047	0.007		0	4.06668e-09	0		1474.62	1.88389e-07	0		565.608	42.1233	8.6726	4.85705
0.74	0.26	0.755	0	0	0		1	0	0	0	0		1474.62	625		0.047	0.007		0	1.45623e-09	0		1474.62	7.19385e-08	0		557.965	41.5541	8.55541	4.85705
0.75	0.25	0.7575	0	0	0		1	0	0	0	0		1474.62	625		0.047	0.007		0	4.84067e-10	0		1474.62	2.57603e-08	0		550.525	41	8.44133	4.85705
0.76	0.24	0.76	0	0	0		1	0	0	0	0		1474.62	625		0.047	0.007		0	1.47444e-10	0		1474.62	8.56301e-09	0		543.281	40.4605	8.33026	4.85705
0.77	0.23	0.7625	0	0	0		1	0	0	0	0		1474.62	625		0.047	0.007		0	4.04528e-11	0		1474.62	2.60825e-09	0		536.226	39.9351	8.22208	4.85705
0.78	0.22	0.765	0	0	0		1	0	0	0	0		1474.62	625		0.047	0.007		0	9.76434e-12	0		1474.62	7.15599e-10	0		529.351	39.4231	8.11667	4.85705
0.79	0.21	0.7675	0	0	0		1	0	0	0	0		1474.62	625		0.047	0.007		0	2.00414e-12	0		1474.62	1.72729e-10	0		522.65	38.9241	8.01392	4.85705
0.8	0.2	0.77	0	0	0		1	0	0	0	0		1474.62	625		0.047	0.007		0	3.31714e-13	0		1474.62	3.54528e-11	0		516.117	38.4375	7.91375	4.85705
0.81	0.19	0.7725	0	0	0		1	0	0	0	0		1474.62	625		0.047	0.007		0	4.03343e-14	0		1474.62	5.86792e-12	0		509.746	37.963	7.81605	4.85705
0.82	0.18	0.775	0	0	0		1	0	0	0	0		1474.62	625		0.047	0.007		0	2.93606e-15	0		1474.62	7.13502e-13	0		503.529	37.5	7.72073	4.85705
0.83	0.17	0.7775	0	0	0		1	0	0	0	0		1474.62	625		0.047	0.007		0	5.35879e-17	0		1474.62	5.19381e-14	0		497.463	37.0482	7.62771	4.85705
0.84	0.16	0.78	0	0	0		1	0	0	0	0		1474.62	625		0.047	0.007		0	-2.31005e-18	0		1474.62	9.47955e-16	0		491.54	36.6071	7.5369	4.85705
0.85	0.15	0.7825	0	0	0		1	0	0	0	0		1474.62	625		0.047	0.007		0	2.60223e-19	0		1474.62	-4.08641e-17	0		485.758	36.1765	7.44824	4.85705
0.86	0.14	0.785	0	0	0		1	0	0	0	0		1474.62	625		0.047	0.007		0	-4.99947e-20	0		1474.62	4.60326e-18	0		480.109	35.7558	7.36163	4.85705
0.87	0.13	0.7875	0	0	0		1	0	0	0	0		1474.62	625		0.047	0.007		0	1.41897e-20	0		1474.62	-8.84393e-19	0		474.591	35.3448	7.27701	4.85705
0.88	0.12	0.79	0	0	0		1	0	0	0	0		1474.62	625		0.047	0.007		0	-5.5455e-21	0		1474.62	2.51013e-19	0		469.198	34.9432	7.19432	4.85705
0.89	0.11	0.7925	0	0	0		1	0	0	0	0		1474.62	625		0.047	0.007		0	2.86839e-21	0		1474.62	-9.80983e-20	0		463.926	34.5506	7.11348	4.85705
0.9	0.1	0.795	0	0	0		1	0	0	0	0		1474.62	625		0.047	0.007		0	-1.91888e-21	0		1474.62	5.07411e-20	0		458.771	34.1667	7.03444	4.85705
0.91	0.09	0.7975	0	0	0		1	0	0	0	0		1474.62	625		0.047	0.007		0	1.63951e-21	0		1474.62	-3.39444e-20	0		453.73	33.7912	6.95714	4.85705
0.92	0.08	0.8	0	0	0		1	0	0	0	0		1474.62	625		0.047	0.007		0	-1.78087e-21	0		1474.62	2.90025e-20	0		448.798	33.4239	6.88152	4.85705
0.93	0.07	0.8025	0	0	0		1	0	0	0	0		1474.62	625		0.047	0.007		0	2.46516e-21	0		1474.62	-3.1503e-20	0		443.972	33.0645	6.80753	4.85705
0.94	0.06	0.805	0	0	0		1	0	0	0	0		1474.62	625		0.047	0.007		0	-4.39197e-21	0		1474.62	4.36079e-20	0		439.249	32.7128	6.73511	4.85705
0.95	0.05	0.8075	0	0	0		1	0	0	0	0		1474.62	625		0.047	0.007		0	1.02682e-20	0		1474.62	-7.76927e-20	0		434.625	32.3684	6.66421	4.85705
0.96	0.04	0.81	0	0	0		1	0	0	0	0		1474.62	625		0.047	0.007		0	-3.25751e-20	0		1474.62	1.81641e-19	0		430.098	32.0313	6.59479	4.85705
0.97	0.03	0.8125	0	0	0		1	0	0	0	0		1474.62	625		0.047	0.007		0	1.48648e-19	0		1474.62	-5.76245e-19	0		425.664	31.701	6.5268	4.85705
0.98	0.02	0.815	0	0	0		1	0	0	0	0		1474.62	625		0.047	0.007		0	-1.0918e-18	0		1474.62	2.62954e-18	0		421.32	31.3776	6.4602	4.85705
0.99	0.01	0.8175	0	0	0		1	0	0	0	0		1474.62	625		0.047	0.007		0	1.713e-17	0		1474.62	-1.93136e-17	0		417.065	31.0606	6.39495	4.85705
Notes:
DCusulfide/melt is estimtated by DCumss/melt of 250 (Barnes and Lightfoot, 2005), DCusulfide liquid/melt of 1000 (Li et al., 2012) and mss/sulfide liquid ratio of 5:1.
References:
Workman, R. K. & Hart, S. R. Major and trace element composition of the depleted MORB mantle (DMM). Earth and Planetary Science Letters 231, 53–72 (2005).
Salters, V. J. M. & Stracke, A. Composition of the depleted mantle. Geochemistry, Geophysics, Geosystems 5, (2004).
Parman, S. W. & Grove, T. L. Harzburgite Melting with and without H2O: Experimental Data and Predictive Modeling. Journal of Geophysical Research: Solid Earth 109, B02201 (2004).
Gaetani, G. A., & Grove, T. L. The influence of water on melting of mantle peridotite. Contributions to Mineralogy and Petrology 131, 323-346 (1998).
Kelemen, P. B., Johnson, K. T. M., Kinzler, R. J. & Irving, A. J. High-field-strength element depletions in arc basalts due to mantle–magma interaction. Nature 345, 521–524 (1990).
Horn, I., Foley, S. F., Jackson, S. E. & Jenner, G. A. Experimentally determined partitioning of high field strength- and selected transition elements between spinel and basaltic melt. Chemical Geology 117, 193–218 (1994).
McDade, P., Blundy, J. D. & Wood, B. J. Trace element partitioning between mantle wedge peridotite and hydrous MgO-rich melt. American Mineralogist 88, 1825–1831 (2003).
Li, Y., Li, Y.-X. & Xu, Z. The partitioning of Cu and Ag between minerals and silicate melts during partial melting of planetary silicate mantles. Geochimica et Cosmochimica Acta 324, 280–311 (2022).
Saal, A. E., Hauri, E. H., Langmuir, C. H. & Perfit, M. R. Vapour undersaturation in primitive mid-ocean-ridge basalt and the volatile content of Earth’s upper mantle. Nature 419, 451–455 (2002).
Sun, Z. et al. Sulfur abundance and heterogeneity in the MORB mantle estimated by copper partitioning and sulfur solubility modelling. Earth and Planetary Science Letters 538, 116169 (2020).
Jugo, P. J., Luth, R. W. & Richards, J. P. Experimental data on the speciation of sulfur as a function of oxygen fugacity in basaltic melts. Geochimica et Cosmochimica Acta 69, 497–503 (2005).
Li, Y., & Audétat, A. Partitioning of V, Mn, Co, Ni, Cu, Zn, As, Mo, Ag, Sn, Sb, W, Au, Pb, and Bi between sulfide phases and hydrous basanite melt at upper mantle conditions. Earth and Planetary Science Letters 355, 327-340 (2012).
Barnes, S. J. & Lightfoot, P. C. Formation of magmatic nickel-sulfide ore deposits and processses affecting their copper and platinum-group element contents. Economic Geology 100, 179-213 (2005).
Plank, T. & Langmuir, C. H. The chemical composition of subducting sediment and its consequences for the crust and mantle. Chemical Geology 145, 325–394 (1998).
