# Supplementary material for: Latitude-dependent oxygen fugacity in arc magmas
Source: Nat Commun. 2024 Jul 18;15:6050. doi: 10.1038/s41467-024-50337-6 (PMC11258285; doi:10.1038/s41467-024-50337-6)
Supplement: Supplementary file 13 — Supplementary Data 10 [file 41467_2024_50337_MOESM13_ESM.xlsx]

## Sheet: Sheet1
Supplementary Table 10. Model for Cu and Zr variations during mid-ocean ridge mantle melting.
mantle melting condition				Mineral modes and melting reaction of the mantle							Dmineral/melt for Cu and Zr											S in the mantle sulfides				S, Cu, and Zr in the mantle
fO2(FMQ)					Ol	Opx	Cpx	Sp	Reference		phase	Ol		Opx		Cpx		Sp		Bulk D		composition	S in sulfide(ppm)	S in sulfide(wt%)	Reference	Co (ppm)	Average	uncertainty		References
0				spinel lherzolite(DMM)	0.57	0.28	0.13	0.02	Workman and Hart (2005)			D	Reference	D	Reference	D	Reference	D	Reference			(Fe,Ni,Cu)S	369000	36.9	Jugo et al. (2005)	S	150	200	400	Sun et al. (2020); Saal et al. (2002)
				melting reaction for lherzolite	0.221727	-0.364742	-0.816616	-0.0374873	Gaetani and Grove (1998)		Zr	0.007	Kelemen (1990)	0.027	McDade et al (2003)	0.103	McDade et al (2003)	0.06	Horn (1994)	Zr	0.02614					Cu	30			Salters and Stracke (2004)
				melting reaction for harzburgite	0.0730159	-1.07302			Fallon et al. (2008)		Cu	0.047	Li et al. (2022) GCA	0.0279	Li et al. (2022) GCA	0.0601	Li et al. (2022) GCA	0.15	Li et al. (2022) GCA	Cu	0.045415					Zr	5.082	6.087	4.269	Salters and Stracke (2004); Workman and Hart (2005)
		Mineral modes (without sulfide)					Mineral modes (with sulfide)									Bulk D			Peridotite residue				instantaneous melt				Aggregated melt
F	Mass of residue	Ol	Opx	Cpx	Sp		Ol	Opx	Cpx	Sp	sulfide		SCSS	DCusulfide/melt		Cu	Zr		S	Cu	Zr		S	Cu	Zr		S	Cu	Zr	Cu/Zr
0	1	0.57	0.28	0.13	0.02		0.569768	0.279886	0.129947	0.0199919	0.000406504	1740	1458.49	850		0.390925	0.0261294		150	30	5.082		1458.49
0.01	0.99	0.572217	0.276353	0.121834	0.0196251		0.577766	0.279032	0.123015	0.0198154	0.000370685		1458.49	850		0.360388	0.0254377		136.783	29.5398	3.70216		1458.49	75.5638	141.686		1458.49	75.5638	141.686	0.533319
0.02	0.98	0.574435	0.272705	0.113668	0.0192503		0.585927	0.278161	0.115942	0.0196354	0.000334136		1458.49	850		0.329228	0.024732		123.296	29.0194	2.66622		1458.49	80.5372	105.225		1458.49	78.0505	123.455	0.632216
0.03	0.97	0.576652	0.269058	0.105502	0.0188754		0.594257	0.277272	0.108722	0.0194516	0.000296832		1458.49	850		0.297425	0.0240117		109.531	28.428	1.89663		1458.49	86.3837	77.316		1458.49	80.8282	108.076	0.747886
0.04	0.96	0.578869	0.26541	0.0973354	0.0185005		0.60276	0.276364	0.101353	0.0192641	0.000258752		1458.49	850		0.26496	0.0232763		95.4794	27.7515	1.33138		1458.49	93.3746	56.1606		1458.49	83.9648	95.0968	0.88294
0.05	0.95	0.581086	0.261763	0.0891692	0.0181256		0.611443	0.275438	0.0938274	0.0190725	0.00021987		1458.49	850		0.231812	0.0225255		81.1319	26.9708	0.921273		1458.49	101.911	40.2917		1458.49	87.5541	84.1358	1.04063
0.06	0.94	0.583304	0.258116	0.081003	0.0177508		0.62031	0.274491	0.0861421	0.0188769	0.00018016		1458.49	850		0.197958	0.0217587		66.4791	26.0597	0.627646		1458.49	112.616	28.5222		1458.49	91.7311	74.8669	1.22526
0.07	0.93	0.585521	0.254468	0.0728369	0.0173759		0.629368	0.273524	0.0782913	0.0186771	0.000139597		1458.49	850		0.163376	0.0209754		51.5112	24.9795	0.420424		1458.49	126.517	19.8993		1458.49	96.7005	67.0144	1.44298
0.08	0.92	0.587738	0.250821	0.0646707	0.017001		0.638623	0.272536	0.0702697	0.0184729	9.81515e-05		1458.49	850		0.128042	0.020175		36.2179	23.6701	0.276457		1458.49	145.448	13.6654		1458.49	102.794	60.3457	1.70342
0.09	0.91	0.589955	0.247173	0.0565046	0.0166261		0.648082	0.271526	0.0620718	0.0182643	5.57954e-05		1458.49	850		0.0919317	0.019357		20.5885	22.0283	0.178138		1458.49	173.076	9.22346		1458.49	110.603	54.6655	2.02327
0.1	0.9	0.592173	0.243526	0.0483384	0.0162513		0.657751	0.270494	0.0536915	0.018051	1.24981e-05		1458.49	850		0.0550189	0.0185209		4.61179	19.85	0.112248		1458.49	218.075	6.10827		1458.49	121.35	49.8098	2.43627
0.11	0.89	0.59439	0.239878	0.0401722	0.0158764		0.667616	0.26943	0.0451213	0.0178323	0		1458.49	850		0.0442817	0.0176654		0	16.6135	0.0689994		1458.49	307.901	3.96136		1458.49	138.309	45.6417	3.03033
0.12	0.88	0.596607	0.236231	0.0320061	0.0155015		0.677696	0.268339	0.0363563	0.0176084	0		1458.49	850		0.0441647	0.0167902		0	13.2957	0.0412596		1458.49	308.577	2.5101		1336.95	152.498	42.0474	3.62682
0.13	0.87	0.598825	0.232584	0.0238399	0.0151266		0.688008	0.267222	0.0273904	0.0173795	0		1458.49	850		0.044045	0.015895		0	10.6038	0.0239199		1458.49	247.486	1.54981		1234.11	159.805	38.9322	4.1047
0.14	0.86	0.601042	0.228936	0.0156738	0.0147518		0.698558	0.26608	0.0182168	0.0171452	0		1458.49	850		0.0439225	0.0149791		0	8.42695	0.0133907		1458.49	197.816	0.929431		1145.96	162.52	36.2177	4.48731
0.15	0.85	0.603259	0.225289	0.0075076	0.0143769		0.709356	0.264911	0.00882798	0.0169054	0		1458.49	850		0.0437971	0.0140417		0	6.67242	0.00720343		1458.49	157.563	0.539311		1069.56	162.19	33.8392	4.79295
0.16	0.84	0.605476	0.221641	0	0.014002		0.719846	0.263507	0	0.0166469	0		1458.49	850		0.0436816	0.0131524		0	5.26319	0.00370129		1458.49	125.047	0.301383		1002.71	159.868	31.7431	5.03632
0.17	0.83	0.607694	0.217994	0	0.0136272		0.724035	0.259728	0	0.016236	0		1458.49	850		0.0437115	0.0130551		0	4.13565	0.00180878		1458.49	98.8489	0.16078		943.731	156.279	29.8853	5.22929
0.18	0.82	0.609911	0.214347	0	0.0132523		0.728243	0.255933	0	0.0158234	0		1458.49	850		0.0437415	0.0129573		0	3.23939	0.000868626		1458.49	77.6293	0.0789017		891.302	151.909	28.2294	5.38125
0.19	0.81	0.612128	0.210699	0	0.0128774		0.73247	0.252121	0	0.015409	0		1458.49	850		0.0437716	0.0128591		0	2.52911	0.00040958		1458.49	60.7719	0.0380514		844.391	147.113	26.7456	5.50044
0.2	0.8	0.614345	0.207052	0	0.0125025		0.736714	0.248293	0	0.0149928	0		1458.49	850		0.0438019	0.0127605		0	1.96797	0.000189463		1458.49	47.4203	0.018019		802.172	142.128	25.4092	5.59356
0.21	0.79	0.616563	0.203404	0	0.0121277		0.740977	0.244448	0	0.0145749	0		1458.49	850		0.0438322	0.0126614		0	1.52607	8.58975e-05		1458.49	36.8784	0.00837114		763.973	137.116	24.1997	5.66604
0.22	0.78	0.61878	0.199757	0	0.0117528		0.745258	0.240587	0	0.014155	0		1458.49	850		0.0438628	0.012562		0	1.17921	3.81299e-05		1458.49	28.5813	0.00381177		729.247	132.183	23.0999	5.72223
0.23	0.77	0.620997	0.196109	0	0.0113779		0.749558	0.236709	0	0.0137334	0		1458.49	850		0.0438934	0.012462		0	0.907864	1.65541e-05		1458.49	22.0725	0.00169947		697.541	127.395	22.0956	5.76565
0.24	0.76	0.623215	0.192462	0	0.011003		0.753877	0.232813	0	0.0133099	0		1458.49	850		0.0439242	0.0123617		0	0.696337	7.02068e-06		1458.49	16.9839	0.000741091		668.476	122.795	21.175	5.79906
0.25	0.75	0.625432	0.188815	0	0.0106282		0.758214	0.228901	0	0.0128846	0		1458.49	850		0.0439551	0.0122609		0	0.532031	2.90488e-06		1458.49	13.0193	0.000315705		641.737	118.404	20.328	5.82467
0.26	0.74	0.627649	0.185167	0	0.0102533		0.762571	0.224971	0	0.0124574	0		1458.49	850		0.0439862	0.0121597		0	0.404874	1.17096e-06		1458.49	9.94161	0.000131215		617.055	114.232	19.5462	5.84423
0.27	0.73	0.629866	0.18152	0	0.00987842		0.766947	0.221025	0	0.0120283	0		1458.49	850		0.0440173	0.012058		0	0.306843	4.59144e-07		1458.49	7.5612	5.31334e-05		594.201	110.281	18.8222	5.85911
0.28	0.72	0.632084	0.177872	0	0.00950355		0.771342	0.217061	0	0.0115973	0		1458.49	850		0.0440487	0.0119559		0	0.231561	1.7483e-07		1458.49	5.72711	2.09297e-05		572.98	106.547	18.15	5.87038
0.29	0.71	0.634301	0.174225	0	0.00912867		0.775757	0.213079	0	0.0111645	0		1458.49	850		0.0440801	0.0118533		0	0.173984	6.45265e-08		1458.49	4.31951	8.0064e-06		553.222	103.022	17.5241	5.87888
0.3	0.7	0.636518	0.170578	0	0.0087538		0.780191	0.20908	0	0.0107297	0		1458.49	850		0.0441117	0.0117503		0	0.130133	2.30366e-08		1458.49	3.2436	2.96881e-06		534.781	99.6964	16.94	5.88526
0.31	0.69	0.638736	0.16693	0	0.00837893		0.784644	0.205063	0	0.010293	0		1458.49	850		0.0441435	0.0116468		0	0.0968788	7.93723e-09		1458.49	2.42465	1.0649e-06		517.53	96.5586	16.3935	5.89003
0.32	0.68	0.640953	0.163283	0	0.00800405		0.789118	0.201028	0	0.0098543	0		1458.49	850		0.0441754	0.0115428		0	0.071774	2.63258e-09		1458.49	1.80401	3.68654e-07		501.357	93.5975	15.8812	5.89358
0.33	0.67	0.64317	0.159635	0	0.00762918		0.793611	0.196975	0	0.00941369	0		1458.49	850		0.0442074	0.0114384		0	0.0529088	8.38133e-10		1458.49	1.33574	1.2286e-07		486.165	90.8017	15.4	5.89621
0.34	0.66	0.645387	0.155988	0	0.00725431		0.798125	0.192904	0	0.00897111	0		1458.49	850		0.0442396	0.0113335		0	0.0388003	2.55308e-10		1458.49	0.98407	3.93046e-08		471.866	88.16	14.9471	5.89815
0.35	0.65	0.647605	0.15234	0	0.00687943		0.802659	0.188815	0	0.00852655	0		1458.49	850		0.0442719	0.0112282		0	0.0283014	7.41379e-11		1458.49	0.721234	1.20313e-08		458.384	85.6617	14.52	5.89957
0.36	0.64	0.649822	0.148693	0	0.00650456		0.807213	0.184707	0	0.00808	0		1458.49	850		0.0443043	0.0111224		0	0.0205285	2.0437e-11		1458.49	0.525763	3.51099e-09		445.651	83.2968	14.1167	5.9006
0.37	0.63	0.652039	0.145046	0	0.00612969		0.811787	0.180581	0	0.00763144	0		1458.49	850		0.0443369	0.0110161		0	0.0148046	5.32214e-12		1458.49	0.381137	9.72674e-10		433.606	81.0559	13.7351	5.90135
0.38	0.62	0.654256	0.141398	0	0.00575481		0.816382	0.176437	0	0.00718086	0		1458.49	850		0.0443697	0.0109093		0	0.0106127	1.30192e-12		1458.49	0.2747	2.54575e-10		422.196	78.9301	13.3737	5.90189
0.39	0.61	0.656474	0.137751	0	0.00537994		0.820998	0.172274	0	0.00672825	0		1458.49	850		0.0444026	0.0108021		0	0.00756044	2.97172e-13		1458.49	0.196802	6.25917e-11		411.37	76.9113	13.0308	5.90228
0.4	0.6	0.658691	0.134103	0	0.00500507		0.825635	0.168092	0	0.00627359	0		1458.49	850		0.0444356	0.0106943		0	0.00535119	6.2787e-14		1458.49	0.140116	1.43602e-11		401.086	74.992	12.705	5.90256
0.41	0.59	0.660908	0.130456	0	0.00463019		0.830293	0.163891	0	0.00581687	0		1458.49	850		0.0444688	0.0105861		0	0.00376202	1.216e-14		1458.49	0.0991121	3.04978e-12		391.303	73.1653	12.3951	5.90275
0.42	0.58	0.663126	0.126809	0	0.00425532		0.834972	0.15967	0	0.00535807	0		1458.49	850		0.0445022	0.0104774		0	0.00262626	2.13271e-15		1458.49	0.0696359	5.93744e-13		381.987	71.4249	12.1	5.90289
0.43	0.57	0.665343	0.123161	0	0.00388045		0.839672	0.155431	0	0.00489718	0		1458.49	850		0.0445357	0.0103682		0	0.00182	3.33544e-16		1458.49	0.0485831	1.04685e-13		373.103	69.765	11.8186	5.90298
0.44	0.56	0.66756	0.119514	0	0.00350557		0.844394	0.151172	0	0.00443418	0		1458.49	850		0.0445693	0.0102585		0	0.00125166	4.558e-17		1458.49	0.0336475	1.64595e-14		364.623	68.1802	11.55	5.90305
0.45	0.55	0.669777	0.115866	0	0.0031307		0.849137	0.146894	0	0.00396907	0		1458.49	850		0.0446031	0.0101482		0	0.000853942	5.2928e-18		1458.49	0.0231258	2.26137e-15		356.521	66.6656	11.2933	5.9031
0.46	0.54	0.671995	0.112219	0	0.00275583		0.853902	0.142596	0	0.00350182	0		1458.49	850		0.0446371	0.0100375		0	0.000577759	5.01505e-19		1458.49	0.0157679	2.64023e-16		348.77	65.2167	11.0478	5.90313
0.47	0.53	0.674212	0.108571	0	0.00238095		0.858689	0.138279	0	0.00303243	0		1458.49	850		0.0446712	0.00992629		0	0.000387498	3.63579e-20		1458.49	0.0106616	2.51543e-17		341.35	63.8294	10.8128	5.90315
0.48	0.52	0.676429	0.104924	0	0.00200608		0.863498	0.133941	0	0.00256087	0		1458.49	850		0.0447055	0.00981455		0	0.000257523	1.79258e-21		1458.49	0.00714618	1.83375e-18		334.238	62.4997	10.5875	5.90316
0.49	0.51	0.678646	0.101277	0	0.00163121		0.868329	0.129584	0	0.00208713	0		1458.49	850		0.0447399	0.00970229		0	0.000169509	4.50187e-23		1458.49	0.00474623	9.09183e-20		327.417	61.2243	10.3714	5.90317
0.5	0.5	0.680864	0.0976292	0	0.00125633		0.873183	0.125206	0	0.0016112	0		1458.49	850		0.0447745	0.00958951		0	0.000110457	0		1458.49	0.00312215	2.29626e-21		320.869	59.9999	10.164	5.90318
0.51	0.49	0.683081	0.0939818	0	0.000881459		0.878059	0.120808	0	0.00113306	0		1458.49	850		0.0448093	0.00947621		0	7.12171e-05	0		1458.49	0.00203319	0		314.577	58.8235	9.96471	5.90318
0.52	0.48	0.685298	0.0903343	0	0.000506586		0.882958	0.116389	0	0.000652699	0		1458.49	850		0.0448442	0.00936238		0	4.54076e-05	0		1458.49	0.00131007	0		308.528	57.6923	9.77308	5.90318
0.53	0.47	0.687516	0.0866869	0	0.000131712		0.88788	0.11195	0	0.000170097	0		1458.49	850		0.0448793	0.00924802		0	2.86128e-05	0		1458.49	0.000834764	0		302.706	56.6037	9.58868	5.90319
0.54	0.46	0.689733	0.0830395	0	0		0.892543	0.107457	0	0	0		1458.49	850		0.0449476	0.00914913		0	1.78071e-05	0		1458.49	0.000525676	0		297.101	55.5555	9.41111	5.90319
0.55	0.45	0.69195	0.0793921	0	0		0.897073	0.102927	0	0	0		1458.49	850		0.0450341	0.00905854		0	1.09418e-05	0		1458.49	0.000326747	0		291.699	54.5454	9.24	5.90319
0.56	0.44	0.694167	0.0757447	0	0		0.901619	0.098381	0	0	0		1458.49	850		0.0451209	0.00896762		0	6.63456e-06	0		1458.49	0.000200458	0		286.49	53.5714	9.075	5.90319
0.57	0.43	0.696385	0.0720973	0	0		0.906182	0.0938178	0	0	0		1458.49	850		0.0452081	0.00887636		0	3.9666e-06	0		1458.49	0.000121357	0		281.464	52.6316	8.91579	5.90319
0.58	0.42	0.698602	0.0684498	0	0		0.910762	0.0892376	0	0	0		1458.49	850		0.0452956	0.00878475		0	2.33625e-06	0		1458.49	7.24413e-05	0		276.611	51.7241	8.76207	5.90319
0.59	0.41	0.700819	0.0648024	0	0		0.91536	0.0846403	0	0	0		1458.49	850		0.0453834	0.00869281		0	1.35422e-06	0		1458.49	4.25991e-05	0		271.923	50.8475	8.61356	5.90319
0.6	0.4	0.703036	0.061155	0	0		0.919974	0.0800258	0	0	0		1458.49	850		0.0454715	0.00860052		0	7.71734e-07	0		1458.49	2.46539e-05	0		267.391	50	8.47	5.90319
0.61	0.39	0.705254	0.0575076	0	0		0.924606	0.075394	0	0	0		1458.49	850		0.04556	0.00850788		0	4.31849e-07	0		1458.49	1.40272e-05	0		263.007	49.1803	8.33115	5.90319
0.62	0.38	0.707471	0.0538602	0	0		0.929255	0.0707447	0	0	0		1458.49	850		0.0456488	0.00841489		0	2.36979e-07	0		1458.49	7.83693e-06	0		258.765	48.3871	8.19677	5.90319
0.63	0.37	0.709688	0.0502128	0	0		0.933922	0.066078	0	0	0		1458.49	850		0.0457379	0.00832156		0	1.27338e-07	0		1458.49	4.29369e-06	0		254.658	47.619	8.06667	5.90319
0.64	0.36	0.711906	0.0465653	0	0		0.938606	0.0613937	0	0	0		1458.49	850		0.0458274	0.00822787		0	6.68893e-08	0		1458.49	2.30348e-06	0		250.679	46.875	7.94062	5.90319
0.65	0.35	0.714123	0.0429179	0	0		0.943308	0.0566917	0	0	0		1458.49	850		0.0459172	0.00813383		0	3.42844e-08	0		1458.49	1.20806e-06	0		246.822	46.1538	7.81846	5.90319
0.66	0.34	0.71634	0.0392705	0	0		0.948028	0.0519719	0	0	0		1458.49	850		0.0460073	0.00803944		0	1.71103e-08	0		1458.49	6.18204e-07	0		243.082	45.4545	7.7	5.90319
0.67	0.33	0.718557	0.0356231	0	0		0.952766	0.0472342	0	0	0		1458.49	850		0.0460978	0.00794468		0	8.29449e-09	0		1458.49	3.08031e-07	0		239.454	44.7761	7.58507	5.90319
0.68	0.32	0.720775	0.0319757	0	0		0.957522	0.0424785	0	0	0		1458.49	850		0.0461887	0.00784957		0	3.89486e-09	0		1458.49	1.49083e-07	0		235.933	44.1176	7.47353	5.90319
0.69	0.31	0.722992	0.0283283	0	0		0.962295	0.0377047	0	0	0		1458.49	850		0.0462798	0.00775409		0	1.76592e-09	0		1458.49	6.9892e-08	0		232.514	43.4783	7.36522	5.90319
0.7	0.3	0.725209	0.0246809	0	0		0.967087	0.0329126	0	0	0		1458.49	850		0.0463714	0.00765825		0	7.70194e-10	0		1458.49	3.16376e-08	0		229.192	42.8571	7.26	5.90319
0.71	0.29	0.727426	0.0210334	0	0		0.971898	0.0281023	0	0	0		1458.49	850		0.0464632	0.00756205		0	3.21712e-10	0		1458.49	1.37762e-08	0		225.964	42.2535	7.15775	5.90319
0.72	0.28	0.729644	0.017386	0	0		0.976726	0.0232735	0	0	0		1458.49	850		0.0465555	0.00746547		0	1.28023e-10	0		1458.49	5.745e-09	0		222.825	41.6667	7.05833	5.90319
0.73	0.27	0.731861	0.0137386	0	0		0.981574	0.0184262	0	0	0		1458.49	850		0.0466481	0.00736852		0	4.82291e-11	0		1458.49	2.28246e-09	0		219.773	41.0959	6.96164	5.90319
0.74	0.26	0.734078	0.0100912	0	0		0.98644	0.0135603	0	0	0		1458.49	850		0.046741	0.00727121		0	1.70667e-11	0		1458.49	8.5845e-10	0		216.803	40.5405	6.86757	5.90319
0.75	0.25	0.736296	0.00644377	0	0		0.991324	0.00867568	0	0	0		1458.49	850		0.0468343	0.00717351		0	5.61815e-12	0		1458.49	3.03281e-10	0		213.912	40	6.776	5.90319
0.76	0.24	0.738513	0.00279635	0	0		0.996228	0.00377218	0	0	0		1458.49	850		0.046928	0.00707544		0	1.69921e-12	0		1458.49	9.96727e-11	0		211.098	39.4737	6.68684	5.90319
0.77	0.23	0.74073	0	0	0		1	0	0	0	0		1458.49	850		0.047	0.007		0	4.64543e-13	0		1458.49	3.00965e-11	0		208.356	38.961	6.6	5.90319
0.78	0.22	0.742947	0	0	0		1	0	0	0	0		1458.49	850		0.047	0.007		0	1.1213e-13	0		1458.49	8.21764e-12	0		205.685	38.4615	6.51538	5.90319
0.79	0.21	0.745165	0	0	0		1	0	0	0	0		1458.49	850		0.047	0.007		0	2.30148e-14	0		1458.49	1.98354e-12	0		203.081	37.9747	6.43291	5.90319
0.8	0.2	0.747382	0	0	0		1	0	0	0	0		1458.49	850		0.047	0.007		0	3.80926e-15	0		1458.49	4.07125e-13	0		200.543	37.5	6.3525	5.90319
0.81	0.19	0.749599	0	0	0		1	0	0	0	0		1458.49	850		0.047	0.007		0	4.63182e-16	0		1458.49	6.73848e-14	0		198.067	37.037	6.27407	5.90319
0.82	0.18	0.751817	0	0	0		1	0	0	0	0		1458.49	850		0.047	0.007		0	3.37165e-17	0		1458.49	8.19356e-15	0		195.652	36.5854	6.19756	5.90319
0.83	0.17	0.754034	0	0	0		1	0	0	0	0		1458.49	850		0.047	0.007		0	6.15381e-19	0		1458.49	5.96435e-16	0		193.294	36.1446	6.12289	5.90319
0.84	0.16	0.756251	0	0	0		1	0	0	0	0		1458.49	850		0.047	0.007		0	-2.65276e-20	0		1458.49	1.08859e-17	0		190.993	35.7143	6.05	5.90319
0.85	0.15	0.758468	0	0	0		1	0	0	0	0		1458.49	850		0.047	0.007		0	2.98829e-21	0		1458.49	-4.69266e-19	0		188.746	35.2941	5.97882	5.90319
0.86	0.14	0.760686	0	0	0		1	0	0	0	0		1458.49	850		0.047	0.007		0	-5.74119e-22	0		1458.49	5.2862e-20	0		186.552	34.8837	5.9093	5.90319
0.87	0.13	0.762903	0	0	0		1	0	0	0	0		1458.49	850		0.047	0.007		0	1.62949e-22	0		1458.49	-1.0156e-20	0		184.407	34.4828	5.84138	5.90319
0.88	0.12	0.76512	0	0	0		1	0	0	0	0		1458.49	850		0.047	0.007		0	-6.36822e-23	0		1458.49	2.88253e-21	0		182.312	34.0909	5.775	5.90319
0.89	0.11	0.767337	0	0	0		1	0	0	0	0		1458.49	850		0.047	0.007		0	3.29394e-23	0		1458.49	-1.12652e-21	0		180.263	33.7079	5.71011	5.90319
0.9	0.1	0.769555	0	0	0		1	0	0	0	0		1458.49	850		0.047	0.007		0	-2.20356e-23	0		1458.49	5.8269e-22	0		178.26	33.3333	5.64667	5.90319
0.91	0.09	0.771772	0	0	0		1	0	0	0	0		1458.49	850		0.047	0.007		0	1.88275e-23	0		1458.49	-3.89803e-22	0		176.301	32.967	5.58462	5.90319
0.92	0.08	0.773989	0	0	0		1	0	0	0	0		1458.49	850		0.047	0.007		0	-2.04507e-23	0		1458.49	3.33053e-22	0		174.385	32.6087	5.52391	5.90319
0.93	0.07	0.776207	0	0	0		1	0	0	0	0		1458.49	850		0.047	0.007		0	2.83088e-23	0		1458.49	-3.61767e-22	0		172.51	32.2581	5.46452	5.90319
0.94	0.06	0.778424	0	0	0		1	0	0	0	0		1458.49	850		0.047	0.007		0	-5.04356e-23	0		1458.49	5.00775e-22	0		170.675	31.9149	5.40638	5.90319
0.95	0.05	0.780641	0	0	0		1	0	0	0	0		1458.49	850		0.047	0.007		0	1.17916e-22	0		1458.49	-8.92191e-22	0		168.878	31.5789	5.34947	5.90319
0.96	0.04	0.782858	0	0	0		1	0	0	0	0		1458.49	850		0.047	0.007		0	-3.74079e-22	0		1458.49	2.08589e-21	0		167.119	31.25	5.29375	5.90319
0.97	0.03	0.785076	0	0	0		1	0	0	0	0		1458.49	850		0.047	0.007		0	1.70701e-21	0		1458.49	-6.61735e-21	0		165.396	30.9278	5.23918	5.90319
0.98	0.02	0.787293	0	0	0		1	0	0	0	0		1458.49	850		0.047	0.007		0	-1.25378e-20	0		1458.49	3.01966e-20	0		163.709	30.6122	5.18571	5.90319
0.99	0.01	0.78951	0	0	0		1	0	0	0	0		1458.49	850		0.047	0.007		0	1.96714e-19	0		1458.49	-2.2179e-19	0		162.055	30.303	5.13333	5.90319
mantle melting condition				Mineral modes and melting reaction of the mantle							Dmineral/melt for Cu and Zr											S in the mantle sulfides				S, Cu, and Zr in the mantle
fO2(FMQ)					olivin	Opx	Cpx	Spl	Reference		phase	olivine		orthopyroxene		clinopyroxene		spinel		Bulk D		composition	S in sulfide(ppm)	S in sulfide(wt%)	Reference	Co (ppm)	Average	uncertainty		References
1				spinel lherzolite(DMM)	0.57	0.28	0.13	0.02	Workman and Hart (2005)			Dmin/liq	Reference	Dmin/liq	Reference	Dmin/liq	Reference	Dmin/liq	Reference			(Fe,Ni,Cu)S	369000	36.9	Jugo et al. (2005)	S	150	200	400	Sun et al. (2020); Saal et al. (2002)
				melting reaction for lherzolite	0.221727	-0.364742	-0.816616	-0.0374873	Gaetani and Grove (1998)		Zr	0.007	Kelemen (1990)	0.027	McDade et al (2003)	0.103	McDade et al (2003)	0.06	Horn (1994)	Zr	0.02614					Cu	30			Salters and Stracke (2004)
				melting reaction for harzburgite	0.0730159	-1.07302			Fallon et al. (2008)		Cu	0.047	Li et al. (2022) GCA	0.0279	Li et al. (2022) GCA	0.0601	Li et al. (2022) GCA	0.15	Li et al. (2022) GCA	Cu	0.045415					Zr	5.082	6.087	4.269	Workman and Hart (2005)
		Mineral modes (without sulfide)					Mineral modes (with sulfide)									Bulk D			Peridotite residue				instantaneous melt				Aggregated melt
F	Mass of residue	Ol	Opx	Cpx	Sp		Ol	Opx	Cpx	Sp	sulfide		SCSS	DCusulfide/melt		Cu	Zr		S	Cu	Zr		S	Cu	Zr		S	Cu	Zr	Cu/Zr
0	1	0.57	0.28	0.13	0.02		0.569768	0.279886	0.129947	0.0199919	0.000406504		1458.49	850		0.390925	0.0261294		150	30	5.082		1458.49
0.01	0.99	0.572217	0.276353	0.121834	0.0196251		0.577766	0.279032	0.123015	0.0198154	0.000370685		1458.49	850		0.360388	0.0254377		136.783	29.5398	3.70216		1458.49	75.5638	141.686		1458.49	75.5638	141.686	0.533319
0.02	0.98	0.574435	0.272705	0.113668	0.0192503		0.585927	0.278161	0.115942	0.0196354	0.000334136		1458.49	850		0.329228	0.024732		123.296	29.0194	2.66622		1458.49	80.5372	105.225		1458.49	78.0505	123.455	0.632216
0.03	0.97	0.576652	0.269058	0.105502	0.0188754		0.594257	0.277272	0.108722	0.0194516	0.000296832		1458.49	850		0.297425	0.0240117		109.531	28.428	1.89663		1458.49	86.3837	77.316		1458.49	80.8282	108.076	0.747886
0.04	0.96	0.578869	0.26541	0.0973354	0.0185005		0.60276	0.276364	0.101353	0.0192641	0.000258752		1458.49	850		0.26496	0.0232763		95.4794	27.7515	1.33138		1458.49	93.3746	56.1606		1458.49	83.9648	95.0968	0.88294
0.05	0.95	0.581086	0.261763	0.0891692	0.0181256		0.611443	0.275438	0.0938274	0.0190725	0.00021987		1458.49	850		0.231812	0.0225255		81.1319	26.9708	0.921273		1458.49	101.911	40.2917		1458.49	87.5541	84.1358	1.04063
0.06	0.94	0.583304	0.258116	0.081003	0.0177508		0.62031	0.274491	0.0861421	0.0188769	0.00018016		1458.49	850		0.197958	0.0217587		66.4791	26.0597	0.627646		1458.49	112.616	28.5222		1458.49	91.7311	74.8669	1.22526
0.07	0.93	0.585521	0.254468	0.0728369	0.0173759		0.629368	0.273524	0.0782913	0.0186771	0.000139597		1458.49	850		0.163376	0.0209754		51.5112	24.9795	0.420424		1458.49	126.517	19.8993		1458.49	96.7005	67.0144	1.44298
0.08	0.92	0.587738	0.250821	0.0646707	0.017001		0.638623	0.272536	0.0702697	0.0184729	9.81515e-05		1458.49	850		0.128042	0.020175		36.2179	23.6701	0.276457		1458.49	145.448	13.6654		1458.49	102.794	60.3457	1.70342
0.09	0.91	0.589955	0.247173	0.0565046	0.0166261		0.648082	0.271526	0.0620718	0.0182643	5.57954e-05		1458.49	850		0.0919317	0.019357		20.5885	22.0283	0.178138		1458.49	173.076	9.22346		1458.49	110.603	54.6655	2.02327
0.1	0.9	0.592173	0.243526	0.0483384	0.0162513		0.657751	0.270494	0.0536915	0.018051	1.24981e-05		1458.49	850		0.0550189	0.0185209		4.61179	19.85	0.112248		1458.49	218.075	6.10827		1458.49	121.35	49.8098	2.43627
0.11	0.89	0.59439	0.239878	0.0401722	0.0158764		0.667616	0.26943	0.0451213	0.0178323	0		1458.49	850		0.0442817	0.0176654		0	16.6135	0.0689994		1458.49	307.901	3.96136		1458.49	138.309	45.6417	3.03033
0.12	0.88	0.596607	0.236231	0.0320061	0.0155015		0.677696	0.268339	0.0363563	0.0176084	0		1458.49	850		0.0441647	0.0167902		0	13.2957	0.0412596		1458.49	308.577	2.5101		1336.95	152.498	42.0474	3.62682
0.13	0.87	0.598825	0.232584	0.0238399	0.0151266		0.688008	0.267222	0.0273904	0.0173795	0		1458.49	850		0.044045	0.015895		0	10.6038	0.0239199		1458.49	247.486	1.54981		1234.11	159.805	38.9322	4.1047
0.14	0.86	0.601042	0.228936	0.0156738	0.0147518		0.698558	0.26608	0.0182168	0.0171452	0		1458.49	850		0.0439225	0.0149791		0	8.42695	0.0133907		1458.49	197.816	0.929431		1145.96	162.52	36.2177	4.48731
0.15	0.85	0.603259	0.225289	0.0075076	0.0143769		0.709356	0.264911	0.00882798	0.0169054	0		1458.49	850		0.0437971	0.0140417		0	6.67242	0.00720343		1458.49	157.563	0.539311		1069.56	162.19	33.8392	4.79295
0.16	0.84	0.605476	0.221641	0	0.014002		0.719846	0.263507	0	0.0166469	0		1458.49	850		0.0436816	0.0131524		0	5.26319	0.00370129		1458.49	125.047	0.301383		1002.71	159.868	31.7431	5.03632
0.17	0.83	0.607694	0.217994	0	0.0136272		0.724035	0.259728	0	0.016236	0		1458.49	850		0.0437115	0.0130551		0	4.13565	0.00180878		1458.49	98.8489	0.16078		943.731	156.279	29.8853	5.22929
0.18	0.82	0.609911	0.214347	0	0.0132523		0.728243	0.255933	0	0.0158234	0		1458.49	850		0.0437415	0.0129573		0	3.23939	0.000868626		1458.49	77.6293	0.0789017		891.302	151.909	28.2294	5.38125
0.19	0.81	0.612128	0.210699	0	0.0128774		0.73247	0.252121	0	0.015409	0		1458.49	850		0.0437716	0.0128591		0	2.52911	0.00040958		1458.49	60.7719	0.0380514		844.391	147.113	26.7456	5.50044
0.2	0.8	0.614345	0.207052	0	0.0125025		0.736714	0.248293	0	0.0149928	0		1458.49	850		0.0438019	0.0127605		0	1.96797	0.000189463		1458.49	47.4203	0.018019		802.172	142.128	25.4092	5.59356
0.21	0.79	0.616563	0.203404	0	0.0121277		0.740977	0.244448	0	0.0145749	0		1458.49	850		0.0438322	0.0126614		0	1.52607	8.58975e-05		1458.49	36.8784	0.00837114		763.973	137.116	24.1997	5.66604
0.22	0.78	0.61878	0.199757	0	0.0117528		0.745258	0.240587	0	0.014155	0		1458.49	850		0.0438628	0.012562		0	1.17921	3.81299e-05		1458.49	28.5813	0.00381177		729.247	132.183	23.0999	5.72223
0.23	0.77	0.620997	0.196109	0	0.0113779		0.749558	0.236709	0	0.0137334	0		1458.49	850		0.0438934	0.012462		0	0.907864	1.65541e-05		1458.49	22.0725	0.00169947		697.541	127.395	22.0956	5.76565
0.24	0.76	0.623215	0.192462	0	0.011003		0.753877	0.232813	0	0.0133099	0		1458.49	850		0.0439242	0.0123617		0	0.696337	7.02068e-06		1458.49	16.9839	0.000741091		668.476	122.795	21.175	5.79906
0.25	0.75	0.625432	0.188815	0	0.0106282		0.758214	0.228901	0	0.0128846	0		1458.49	850		0.0439551	0.0122609		0	0.532031	2.90488e-06		1458.49	13.0193	0.000315705		641.737	118.404	20.328	5.82467
0.26	0.74	0.627649	0.185167	0	0.0102533		0.762571	0.224971	0	0.0124574	0		1458.49	850		0.0439862	0.0121597		0	0.404874	1.17096e-06		1458.49	9.94161	0.000131215		617.055	114.232	19.5462	5.84423
0.27	0.73	0.629866	0.18152	0	0.00987842		0.766947	0.221025	0	0.0120283	0		1458.49	850		0.0440173	0.012058		0	0.306843	4.59144e-07		1458.49	7.5612	5.31334e-05		594.201	110.281	18.8222	5.85911
0.28	0.72	0.632084	0.177872	0	0.00950355		0.771342	0.217061	0	0.0115973	0		1458.49	850		0.0440487	0.0119559		0	0.231561	1.7483e-07		1458.49	5.72711	2.09297e-05		572.98	106.547	18.15	5.87038
0.29	0.71	0.634301	0.174225	0	0.00912867		0.775757	0.213079	0	0.0111645	0		1458.49	850		0.0440801	0.0118533		0	0.173984	6.45265e-08		1458.49	4.31951	8.0064e-06		553.222	103.022	17.5241	5.87888
0.3	0.7	0.636518	0.170578	0	0.0087538		0.780191	0.20908	0	0.0107297	0		1458.49	850		0.0441117	0.0117503		0	0.130133	2.30366e-08		1458.49	3.2436	2.96881e-06		534.781	99.6964	16.94	5.88526
0.31	0.69	0.638736	0.16693	0	0.00837893		0.784644	0.205063	0	0.010293	0		1458.49	850		0.0441435	0.0116468		0	0.0968788	7.93723e-09		1458.49	2.42465	1.0649e-06		517.53	96.5586	16.3935	5.89003
0.32	0.68	0.640953	0.163283	0	0.00800405		0.789118	0.201028	0	0.0098543	0		1458.49	850		0.0441754	0.0115428		0	0.071774	2.63258e-09		1458.49	1.80401	3.68654e-07		501.357	93.5975	15.8812	5.89358
0.33	0.67	0.64317	0.159635	0	0.00762918		0.793611	0.196975	0	0.00941369	0		1458.49	850		0.0442074	0.0114384		0	0.0529088	8.38133e-10		1458.49	1.33574	1.2286e-07		486.165	90.8017	15.4	5.89621
0.34	0.66	0.645387	0.155988	0	0.00725431		0.798125	0.192904	0	0.00897111	0		1458.49	850		0.0442396	0.0113335		0	0.0388003	2.55308e-10		1458.49	0.98407	3.93046e-08		471.866	88.16	14.9471	5.89815
0.35	0.65	0.647605	0.15234	0	0.00687943		0.802659	0.188815	0	0.00852655	0		1458.49	850		0.0442719	0.0112282		0	0.0283014	7.41379e-11		1458.49	0.721234	1.20313e-08		458.384	85.6617	14.52	5.89957
0.36	0.64	0.649822	0.148693	0	0.00650456		0.807213	0.184707	0	0.00808	0		1458.49	850		0.0443043	0.0111224		0	0.0205285	2.0437e-11		1458.49	0.525763	3.51099e-09		445.651	83.2968	14.1167	5.9006
0.37	0.63	0.652039	0.145046	0	0.00612969		0.811787	0.180581	0	0.00763144	0		1458.49	850		0.0443369	0.0110161		0	0.0148046	5.32214e-12		1458.49	0.381137	9.72674e-10		433.606	81.0559	13.7351	5.90135
0.38	0.62	0.654256	0.141398	0	0.00575481		0.816382	0.176437	0	0.00718086	0		1458.49	850		0.0443697	0.0109093		0	0.0106127	1.30192e-12		1458.49	0.2747	2.54575e-10		422.196	78.9301	13.3737	5.90189
0.39	0.61	0.656474	0.137751	0	0.00537994		0.820998	0.172274	0	0.00672825	0		1458.49	850		0.0444026	0.0108021		0	0.00756044	2.97172e-13		1458.49	0.196802	6.25917e-11		411.37	76.9113	13.0308	5.90228
0.4	0.6	0.658691	0.134103	0	0.00500507		0.825635	0.168092	0	0.00627359	0		1458.49	850		0.0444356	0.0106943		0	0.00535119	6.2787e-14		1458.49	0.140116	1.43602e-11		401.086	74.992	12.705	5.90256
0.41	0.59	0.660908	0.130456	0	0.00463019		0.830293	0.163891	0	0.00581687	0		1458.49	850		0.0444688	0.0105861		0	0.00376202	1.216e-14		1458.49	0.0991121	3.04978e-12		391.303	73.1653	12.3951	5.90275
0.42	0.58	0.663126	0.126809	0	0.00425532		0.834972	0.15967	0	0.00535807	0		1458.49	850		0.0445022	0.0104774		0	0.00262626	2.13271e-15		1458.49	0.0696359	5.93744e-13		381.987	71.4249	12.1	5.90289
0.43	0.57	0.665343	0.123161	0	0.00388045		0.839672	0.155431	0	0.00489718	0		1458.49	850		0.0445357	0.0103682		0	0.00182	3.33544e-16		1458.49	0.0485831	1.04685e-13		373.103	69.765	11.8186	5.90298
0.44	0.56	0.66756	0.119514	0	0.00350557		0.844394	0.151172	0	0.00443418	0		1458.49	850		0.0445693	0.0102585		0	0.00125166	4.558e-17		1458.49	0.0336475	1.64595e-14		364.623	68.1802	11.55	5.90305
0.45	0.55	0.669777	0.115866	0	0.0031307		0.849137	0.146894	0	0.00396907	0		1458.49	850		0.0446031	0.0101482		0	0.000853942	5.2928e-18		1458.49	0.0231258	2.26137e-15		356.521	66.6656	11.2933	5.9031
0.46	0.54	0.671995	0.112219	0	0.00275583		0.853902	0.142596	0	0.00350182	0		1458.49	850		0.0446371	0.0100375		0	0.000577759	5.01505e-19		1458.49	0.0157679	2.64023e-16		348.77	65.2167	11.0478	5.90313
0.47	0.53	0.674212	0.108571	0	0.00238095		0.858689	0.138279	0	0.00303243	0		1458.49	850		0.0446712	0.00992629		0	0.000387498	3.63579e-20		1458.49	0.0106616	2.51543e-17		341.35	63.8294	10.8128	5.90315
0.48	0.52	0.676429	0.104924	0	0.00200608		0.863498	0.133941	0	0.00256087	0		1458.49	850		0.0447055	0.00981455		0	0.000257523	1.79258e-21		1458.49	0.00714618	1.83375e-18		334.238	62.4997	10.5875	5.90316
0.49	0.51	0.678646	0.101277	0	0.00163121		0.868329	0.129584	0	0.00208713	0		1458.49	850		0.0447399	0.00970229		0	0.000169509	4.50187e-23		1458.49	0.00474623	9.09183e-20		327.417	61.2243	10.3714	5.90317
0.5	0.5	0.680864	0.0976292	0	0.00125633		0.873183	0.125206	0	0.0016112	0		1458.49	850		0.0447745	0.00958951		0	0.000110457	0		1458.49	0.00312215	2.29626e-21		320.869	59.9999	10.164	5.90318
0.51	0.49	0.683081	0.0939818	0	0.000881459		0.878059	0.120808	0	0.00113306	0		1458.49	850		0.0448093	0.00947621		0	7.12171e-05	0		1458.49	0.00203319	0		314.577	58.8235	9.96471	5.90318
0.52	0.48	0.685298	0.0903343	0	0.000506586		0.882958	0.116389	0	0.000652699	0		1458.49	850		0.0448442	0.00936238		0	4.54076e-05	0		1458.49	0.00131007	0		308.528	57.6923	9.77308	5.90318
0.53	0.47	0.687516	0.0866869	0	0.000131712		0.88788	0.11195	0	0.000170097	0		1458.49	850		0.0448793	0.00924802		0	2.86128e-05	0		1458.49	0.000834764	0		302.706	56.6037	9.58868	5.90319
0.54	0.46	0.689733	0.0830395	0	0		0.892543	0.107457	0	0	0		1458.49	850		0.0449476	0.00914913		0	1.78071e-05	0		1458.49	0.000525676	0		297.101	55.5555	9.41111	5.90319
0.55	0.45	0.69195	0.0793921	0	0		0.897073	0.102927	0	0	0		1458.49	850		0.0450341	0.00905854		0	1.09418e-05	0		1458.49	0.000326747	0		291.699	54.5454	9.24	5.90319
0.56	0.44	0.694167	0.0757447	0	0		0.901619	0.098381	0	0	0		1458.49	850		0.0451209	0.00896762		0	6.63456e-06	0		1458.49	0.000200458	0		286.49	53.5714	9.075	5.90319
0.57	0.43	0.696385	0.0720973	0	0		0.906182	0.0938178	0	0	0		1458.49	850		0.0452081	0.00887636		0	3.9666e-06	0		1458.49	0.000121357	0		281.464	52.6316	8.91579	5.90319
0.58	0.42	0.698602	0.0684498	0	0		0.910762	0.0892376	0	0	0		1458.49	850		0.0452956	0.00878475		0	2.33625e-06	0		1458.49	7.24413e-05	0		276.611	51.7241	8.76207	5.90319
0.59	0.41	0.700819	0.0648024	0	0		0.91536	0.0846403	0	0	0		1458.49	850		0.0453834	0.00869281		0	1.35422e-06	0		1458.49	4.25991e-05	0		271.923	50.8475	8.61356	5.90319
0.6	0.4	0.703036	0.061155	0	0		0.919974	0.0800258	0	0	0		1458.49	850		0.0454715	0.00860052		0	7.71734e-07	0		1458.49	2.46539e-05	0		267.391	50	8.47	5.90319
0.61	0.39	0.705254	0.0575076	0	0		0.924606	0.075394	0	0	0		1458.49	850		0.04556	0.00850788		0	4.31849e-07	0		1458.49	1.40272e-05	0		263.007	49.1803	8.33115	5.90319
0.62	0.38	0.707471	0.0538602	0	0		0.929255	0.0707447	0	0	0		1458.49	850		0.0456488	0.00841489		0	2.36979e-07	0		1458.49	7.83693e-06	0		258.765	48.3871	8.19677	5.90319
0.63	0.37	0.709688	0.0502128	0	0		0.933922	0.066078	0	0	0		1458.49	850		0.0457379	0.00832156		0	1.27338e-07	0		1458.49	4.29369e-06	0		254.658	47.619	8.06667	5.90319
0.64	0.36	0.711906	0.0465653	0	0		0.938606	0.0613937	0	0	0		1458.49	850		0.0458274	0.00822787		0	6.68893e-08	0		1458.49	2.30348e-06	0		250.679	46.875	7.94062	5.90319
0.65	0.35	0.714123	0.0429179	0	0		0.943308	0.0566917	0	0	0		1458.49	850		0.0459172	0.00813383		0	3.42844e-08	0		1458.49	1.20806e-06	0		246.822	46.1538	7.81846	5.90319
0.66	0.34	0.71634	0.0392705	0	0		0.948028	0.0519719	0	0	0		1458.49	850		0.0460073	0.00803944		0	1.71103e-08	0		1458.49	6.18204e-07	0		243.082	45.4545	7.7	5.90319
0.67	0.33	0.718557	0.0356231	0	0		0.952766	0.0472342	0	0	0		1458.49	850		0.0460978	0.00794468		0	8.29449e-09	0		1458.49	3.08031e-07	0		239.454	44.7761	7.58507	5.90319
0.68	0.32	0.720775	0.0319757	0	0		0.957522	0.0424785	0	0	0		1458.49	850		0.0461887	0.00784957		0	3.89486e-09	0		1458.49	1.49083e-07	0		235.933	44.1176	7.47353	5.90319
0.69	0.31	0.722992	0.0283283	0	0		0.962295	0.0377047	0	0	0		1458.49	850		0.0462798	0.00775409		0	1.76592e-09	0		1458.49	6.9892e-08	0		232.514	43.4783	7.36522	5.90319
0.7	0.3	0.725209	0.0246809	0	0		0.967087	0.0329126	0	0	0		1458.49	850		0.0463714	0.00765825		0	7.70194e-10	0		1458.49	3.16376e-08	0		229.192	42.8571	7.26	5.90319
0.71	0.29	0.727426	0.0210334	0	0		0.971898	0.0281023	0	0	0		1458.49	850		0.0464632	0.00756205		0	3.21712e-10	0		1458.49	1.37762e-08	0		225.964	42.2535	7.15775	5.90319
0.72	0.28	0.729644	0.017386	0	0		0.976726	0.0232735	0	0	0		1458.49	850		0.0465555	0.00746547		0	1.28023e-10	0		1458.49	5.745e-09	0		222.825	41.6667	7.05833	5.90319
0.73	0.27	0.731861	0.0137386	0	0		0.981574	0.0184262	0	0	0		1458.49	850		0.0466481	0.00736852		0	4.82291e-11	0		1458.49	2.28246e-09	0		219.773	41.0959	6.96164	5.90319
0.74	0.26	0.734078	0.0100912	0	0		0.98644	0.0135603	0	0	0		1458.49	850		0.046741	0.00727121		0	1.70667e-11	0		1458.49	8.5845e-10	0		216.803	40.5405	6.86757	5.90319
0.75	0.25	0.736296	0.00644377	0	0		0.991324	0.00867568	0	0	0		1458.49	850		0.0468343	0.00717351		0	5.61815e-12	0		1458.49	3.03281e-10	0		213.912	40	6.776	5.90319
0.76	0.24	0.738513	0.00279635	0	0		0.996228	0.00377218	0	0	0		1458.49	850		0.046928	0.00707544		0	1.69921e-12	0		1458.49	9.96727e-11	0		211.098	39.4737	6.68684	5.90319
0.77	0.23	0.74073	0	0	0		1	0	0	0	0		1458.49	850		0.047	0.007		0	4.64543e-13	0		1458.49	3.00965e-11	0		208.356	38.961	6.6	5.90319
0.78	0.22	0.742947	0	0	0		1	0	0	0	0		1458.49	850		0.047	0.007		0	1.1213e-13	0		1458.49	8.21764e-12	0		205.685	38.4615	6.51538	5.90319
0.79	0.21	0.745165	0	0	0		1	0	0	0	0		1458.49	850		0.047	0.007		0	2.30148e-14	0		1458.49	1.98354e-12	0		203.081	37.9747	6.43291	5.90319
0.8	0.2	0.747382	0	0	0		1	0	0	0	0		1458.49	850		0.047	0.007		0	3.80926e-15	0		1458.49	4.07125e-13	0		200.543	37.5	6.3525	5.90319
0.81	0.19	0.749599	0	0	0		1	0	0	0	0		1458.49	850		0.047	0.007		0	4.63182e-16	0		1458.49	6.73848e-14	0		198.067	37.037	6.27407	5.90319
0.82	0.18	0.751817	0	0	0		1	0	0	0	0		1458.49	850		0.047	0.007		0	3.37165e-17	0		1458.49	8.19356e-15	0		195.652	36.5854	6.19756	5.90319
0.83	0.17	0.754034	0	0	0		1	0	0	0	0		1458.49	850		0.047	0.007		0	6.15381e-19	0		1458.49	5.96435e-16	0		193.294	36.1446	6.12289	5.90319
0.84	0.16	0.756251	0	0	0		1	0	0	0	0		1458.49	850		0.047	0.007		0	-2.65276e-20	0		1458.49	1.08859e-17	0		190.993	35.7143	6.05	5.90319
0.85	0.15	0.758468	0	0	0		1	0	0	0	0		1458.49	850		0.047	0.007		0	2.98829e-21	0		1458.49	-4.69266e-19	0		188.746	35.2941	5.97882	5.90319
0.86	0.14	0.760686	0	0	0		1	0	0	0	0		1458.49	850		0.047	0.007		0	-5.74119e-22	0		1458.49	5.2862e-20	0		186.552	34.8837	5.9093	5.90319
0.87	0.13	0.762903	0	0	0		1	0	0	0	0		1458.49	850		0.047	0.007		0	1.62949e-22	0		1458.49	-1.0156e-20	0		184.407	34.4828	5.84138	5.90319
0.88	0.12	0.76512	0	0	0		1	0	0	0	0		1458.49	850		0.047	0.007		0	-6.36822e-23	0		1458.49	2.88253e-21	0		182.312	34.0909	5.775	5.90319
0.89	0.11	0.767337	0	0	0		1	0	0	0	0		1458.49	850		0.047	0.007		0	3.29394e-23	0		1458.49	-1.12652e-21	0		180.263	33.7079	5.71011	5.90319
0.9	0.1	0.769555	0	0	0		1	0	0	0	0		1458.49	850		0.047	0.007		0	-2.20356e-23	0		1458.49	5.8269e-22	0		178.26	33.3333	5.64667	5.90319
0.91	0.09	0.771772	0	0	0		1	0	0	0	0		1458.49	850		0.047	0.007		0	1.88275e-23	0		1458.49	-3.89803e-22	0		176.301	32.967	5.58462	5.90319
0.92	0.08	0.773989	0	0	0		1	0	0	0	0		1458.49	850		0.047	0.007		0	-2.04507e-23	0		1458.49	3.33053e-22	0		174.385	32.6087	5.52391	5.90319
0.93	0.07	0.776207	0	0	0		1	0	0	0	0		1458.49	850		0.047	0.007		0	2.83088e-23	0		1458.49	-3.61767e-22	0		172.51	32.2581	5.46452	5.90319
0.94	0.06	0.778424	0	0	0		1	0	0	0	0		1458.49	850		0.047	0.007		0	-5.04356e-23	0		1458.49	5.00775e-22	0		170.675	31.9149	5.40638	5.90319
0.95	0.05	0.780641	0	0	0		1	0	0	0	0		1458.49	850		0.047	0.007		0	1.17916e-22	0		1458.49	-8.92191e-22	0		168.878	31.5789	5.34947	5.90319
0.96	0.04	0.782858	0	0	0		1	0	0	0	0		1458.49	850		0.047	0.007		0	-3.74079e-22	0		1458.49	2.08589e-21	0		167.119	31.25	5.29375	5.90319
0.97	0.03	0.785076	0	0	0		1	0	0	0	0		1458.49	850		0.047	0.007		0	1.70701e-21	0		1458.49	-6.61735e-21	0		165.396	30.9278	5.23918	5.90319
0.98	0.02	0.787293	0	0	0		1	0	0	0	0		1458.49	850		0.047	0.007		0	-1.25378e-20	0		1458.49	3.01966e-20	0		163.709	30.6122	5.18571	5.90319
0.99	0.01	0.78951	0	0	0		1	0	0	0	0		1458.49	850		0.047	0.007		0	1.96714e-19	0		1458.49	-2.2179e-19	0		162.055	30.303	5.13333	5.90319
Notes:
DCusulfide/melt is estimtated by DCumss/melt of 250 (Barnes and Lightfoot, 2005), DCusulfide liquid/melt of 1000 (Li et al., 2012) and mss/sulfide liquid ratio of 5:1.
References:
Workman, R. K. & Hart, S. R. Major and trace element composition of the depleted MORB mantle (DMM). Earth and Planetary Science Letters 231, 53–72 (2005).
Salters, V. J. M. & Stracke, A. Composition of the depleted mantle. Geochemistry, Geophysics, Geosystems 5, (2004).
Falloon, T. J., Green, D. H., Danyushevsky, L. V. & McNeill, A. W. The Composition of Near-solidus Partial Melts of Fertile Peridotite at 1 and 1·5 GPa: Implications for the Petrogenesis of MORB. Journal of Petrology 49, 591–613 (2008).
Gaetani, G. A., & Grove, T. L. The influence of water on melting of mantle peridotite. Contributions to Mineralogy and Petrology 131, 323-346 (1998).
Kelemen, P. B., Johnson, K. T. M., Kinzler, R. J. & Irving, A. J. High-field-strength element depletions in arc basalts due to mantle–magma interaction. Nature 345, 521–524 (1990).
Horn, I., Foley, S. F., Jackson, S. E. & Jenner, G. A. Experimentally determined partitioning of high field strength- and selected transition elements between spinel and basaltic melt. Chemical Geology 117, 193–218 (1994).
McDade, P., Blundy, J. D. & Wood, B. J. Trace element partitioning between mantle wedge peridotite and hydrous MgO-rich melt. American Mineralogist 88, 1825–1831 (2003).
Li, Y., Li, Y.-X. & Xu, Z. The partitioning of Cu and Ag between minerals and silicate melts during partial melting of planetary silicate mantles. Geochimica et Cosmochimica Acta 324, 280–311 (2022).
Saal, A. E., Hauri, E. H., Langmuir, C. H. & Perfit, M. R. Vapour undersaturation in primitive mid-ocean-ridge basalt and the volatile content of Earth’s upper mantle. Nature 419, 451–455 (2002).
Sun, Z. et al. Sulfur abundance and heterogeneity in the MORB mantle estimated by copper partitioning and sulfur solubility modelling. Earth and Planetary Science Letters 538, 116169 (2020).
Jugo, P. J., Luth, R. W. & Richards, J. P. Experimental data on the speciation of sulfur as a function of oxygen fugacity in basaltic melts. Geochimica et Cosmochimica Acta 69, 497–503 (2005).
Li, Y., & Audétat, A. Partitioning of V, Mn, Co, Ni, Cu, Zn, As, Mo, Ag, Sn, Sb, W, Au, Pb, and Bi between sulfide phases and hydrous basanite melt at upper mantle conditions. Earth and Planetary Science Letters 355, 327-340 (2012).
Barnes, S. J. & Lightfoot, P. C. Formation of magmatic nickel-sulfide ore deposits and processses affecting their copper and platinum-group element contents. Economic Geology 100, 179-213 (2005).
