# Supplementary material for: Latitude-dependent oxygen fugacity in arc magmas
Source: Nat Commun. 2024 Jul 18;15:6050. doi: 10.1038/s41467-024-50337-6 (PMC11258285; doi:10.1038/s41467-024-50337-6)
Supplement: Supplementary file 14 — Supplementary Data 11 [file 41467_2024_50337_MOESM14_ESM.xlsx]

## Sheet: Sheet3
Supplementary Table 11. Summerized sulfur content in olivine inclusions from primary basaltic rocks.
SOURCE	CITATION	SAMPLE NAME	LOCATION	LATITUDE	LONGITUDE	HOSTMINERAL (INCLUSION)	Fo	S(PPM)	SIO2(WT%)	TIO2(WT%)	AL2O3(WT%)	FEOT(WT%)	CAO(WT%)	MGO(WT%)	K2O(WT%)	NA2O(WT%)	P2O5(WT%)	Mg#
RASMUSSEN ET AL. (2022)	ZIMMER, M.M., PLANK, T., HAURI, E.H., YOGODZINSKI, G.M., STELLING, P., LARSEN, J., SINGER, B., JICHA, B., MANDEVILLE, C. AND NYE, C.J., 2010. THE ROLE OF WATER IN GENERATING THE CALC-ALKALINE TREND: NEW VOLATILE DATA FOR ALEUTIAN MAGMAS AND A NEW THOLEIITIC INDEX. JOURNAL OF PETROLOGY, 51(12), PP.2411-2444. DOI:10.1093/PETROLOGY/EGQ062	05MZPK-09	ALASKA	53.845	-166.946	OLIVINE	86.8596	1756	49.87	0.81	15.32	8.45	11.21	6.92	1.04	2.36	0.15	59.581
RASMUSSEN ET AL. (2022)	ZIMMER, M.M., PLANK, T., HAURI, E.H., YOGODZINSKI, G.M., STELLING, P., LARSEN, J., SINGER, B., JICHA, B., MANDEVILLE, C. AND NYE, C.J., 2010. THE ROLE OF WATER IN GENERATING THE CALC-ALKALINE TREND: NEW VOLATILE DATA FOR ALEUTIAN MAGMAS AND A NEW THOLEIITIC INDEX. JOURNAL OF PETROLOGY, 51(12), PP.2411-2444. DOI:10.1093/PETROLOGY/EGQ062	05MZPK-09	ALASKA	53.845	-166.946	OLIVINE	88.3562	3277	47.96	0.7	15.85	7.98	12.59	7.5	0.88	2.7	0.18	62.8492
RASMUSSEN ET AL. (2022)	ZIMMER, M.M., PLANK, T., HAURI, E.H., YOGODZINSKI, G.M., STELLING, P., LARSEN, J., SINGER, B., JICHA, B., MANDEVILLE, C. AND NYE, C.J., 2010. THE ROLE OF WATER IN GENERATING THE CALC-ALKALINE TREND: NEW VOLATILE DATA FOR ALEUTIAN MAGMAS AND A NEW THOLEIITIC INDEX. JOURNAL OF PETROLOGY, 51(12), PP.2411-2444. DOI:10.1093/PETROLOGY/EGQ062	05MZPK-09	ALASKA	53.845	-166.946	OLIVINE	86.8273	5392	44.99	0.73	16.03	9.27	12.83	7.93	0.93	2.49	0.1	60.6269
RASMUSSEN ET AL. (2022)	WERNER, C., RASMUSSEN, D.J., PLANK, T., KELLY, P.J., KERN, C., LOPEZ, T., GLISS, J., POWER, J.A., ROMAN, D.C., IZBEKOV, P. AND LYONS, J., 2020. LINKING SUBSURFACE TO SURFACE USING GAS EMISSION AND MELT INCLUSION DATA AT MOUNT CLEVELAND VOLCANO, ALASKA. GEOCHEMISTRY, GEOPHYSICS, GEOSYSTEMS, 21(7), P.E2019GC008882.	CV15DJR09E	ALEUTIANS	52.8223	-169.889	OLIVINE	86.1183	1189.88	50.2041	0.698032	20.3977	6.60666	12.058	5.92179	0.238468	2.46135	0.129595	61.7358
RASMUSSEN ET AL. (2022)	RASMUSSEN, D.J., PLANK, T.A., 2021. MELT INCLUSION DATA FOR THE CENTRAL-EASTERN ALEUTIAN VOLCANOES. EARTHCHEM DATA SUBMISSION.	CL15PS05	ALEUTIANS	52.8365	-169.867	OLIVINE	87.0043	1680.29	47.5463	0.822311	18.0046	8.34015	11.2418	7.55372	0.32832	2.27851	0.126073	61.9811
RASMUSSEN ET AL. (2022)	RASMUSSEN, D.J., PLANK, T.A., 2021. MELT INCLUSION DATA FOR THE CENTRAL-EASTERN ALEUTIAN VOLCANOES. EARTHCHEM DATA SUBMISSION.	CV15DJR04	ALEUTIANS	52.8293	-169.878	OLIVINE	88.4729	2454.32	48.5139	1.01032	18.1086	6.87077	12.9568	5.73648	0.362615	3.07973	0.162037	60.0454
RASMUSSEN ET AL. (2022)	RASMUSSEN, D.J., PLANK, T.A., 2021. MELT INCLUSION DATA FOR THE CENTRAL-EASTERN ALEUTIAN VOLCANOES. EARTHCHEM DATA SUBMISSION.	CV15DJR04	ALEUTIANS	52.8293	-169.878	OLIVINE	88.35	2574.52	48.0364	0.980954	18.0723	7.03167	13.178	6.1062	0.278596	2.88806	0.16346	60.9846
RASMUSSEN ET AL. (2022)	RASMUSSEN, D.J., PLANK, T.A., 2021. MELT INCLUSION DATA FOR THE CENTRAL-EASTERN ALEUTIAN VOLCANOES. EARTHCHEM DATA SUBMISSION.	CV15DJR04	ALEUTIANS	52.8293	-169.878	OLIVINE	89.7609	2597.24	48.0018	0.971908	18.3671	6.43001	13.0557	6.49609	0.277648	2.78149	0.150426	64.5201
RASMUSSEN ET AL. (2022)	RASMUSSEN, D.J., PLANK, T.A., 2021. MELT INCLUSION DATA FOR THE CENTRAL-EASTERN ALEUTIAN VOLCANOES. EARTHCHEM DATA SUBMISSION.	CV15DJR04	ALEUTIANS	52.8293	-169.878	OLIVINE	90.2411	2598.73	49.1992	1.00135	19.0023	5.71965	12.7284	6.09122	0.295555	3.0787	0.165342	65.7175
RASMUSSEN ET AL. (2022)	RASMUSSEN, D.J., PLANK, T.A., 2021. MELT INCLUSION DATA FOR THE CENTRAL-EASTERN ALEUTIAN VOLCANOES. EARTHCHEM DATA SUBMISSION.	Virgin 1A	ALEUTIANS	54.7873	-164.102	OLIVINE	88.9322	4472.89	45.9026	0.778118	15.5836	6.59663	15.6121	7.19954	0.82416	1.81577	0.190525	66.2676
RASMUSSEN ET AL. (2022)	RASMUSSEN, D.J., PLANK, T.A., 2021. MELT INCLUSION DATA FOR THE CENTRAL-EASTERN ALEUTIAN VOLCANOES. EARTHCHEM DATA SUBMISSION.	Virgin 1A	ALEUTIANS	54.7873	-164.102	OLIVINE	89.2085	4688.68	45.717	0.950612	17.5226	7.12433	16.2318	6.71592	0.877886	2.22092	0.210032	62.9192
RASMUSSEN ET AL. (2022)	RASMUSSEN, D.J., PLANK, T.A., 2021. MELT INCLUSION DATA FOR THE CENTRAL-EASTERN ALEUTIAN VOLCANOES. EARTHCHEM DATA SUBMISSION.	Virgin 1A	ALEUTIANS	54.7873	-164.102	OLIVINE	88.6247	4918.92	46.0535	0.904905	16.8965	7.14051	15.0077	6.636	0.906334	2.16294	0.209581	62.5864
RASMUSSEN ET AL. (2022)	RASMUSSEN, D.J., PLANK, T.A., 2021. MELT INCLUSION DATA FOR THE CENTRAL-EASTERN ALEUTIAN VOLCANOES. EARTHCHEM DATA SUBMISSION.	Virgin 1A	ALEUTIANS	54.7873	-164.102	OLIVINE	89.9151	5336.06	45.0822	0.807627	16.8744	6.47302	16.626	5.97124	0.995182	2.19651	0.208128	62.4126
RASMUSSEN ET AL. (2022)	WALOWSKI, K.J., WALLACE, P.J., CLYNNE, M.A., RASMUSSEN, D.J. AND WEIS, D., 2016. SLAB MELTING AND MAGMA FORMATION BENEATH THE SOUTHERN CASCADE ARC. EARTH AND PLANETARY SCIENCE LETTERS, 446, PP.100-112.	CC	CASCADES	42.0235	-121.31	OLIVINE	90.1	600	51.44	0.86	17.73	5.05	10.46	5.88	0.88	3.06	0.16	67.6986
RASMUSSEN ET AL. (2022)	WALOWSKI, K.J., WALLACE, P.J., CLYNNE, M.A., RASMUSSEN, D.J. AND WEIS, D., 2016. SLAB MELTING AND MAGMA FORMATION BENEATH THE SOUTHERN CASCADE ARC. EARTH AND PLANETARY SCIENCE LETTERS, 446, PP.100-112.	BPB	CASCADES	42.028	-121.214	OLIVINE	85.8	900	50.38	0.89	16.87	7.13	9.93	6.59	0.81	2.8	0.24	62.4579
RASMUSSEN ET AL. (2022)	WALOWSKI, K.J., WALLACE, P.J., CLYNNE, M.A., RASMUSSEN, D.J. AND WEIS, D., 2016. SLAB MELTING AND MAGMA FORMATION BENEATH THE SOUTHERN CASCADE ARC. EARTH AND PLANETARY SCIENCE LETTERS, 446, PP.100-112.	BPB	CASCADES	42.028	-121.214	OLIVINE	85.8	900	50.46	0.89	16.87	7.42	9.94	6.86	0.82	2.75	0.23	62.4646
RASMUSSEN ET AL. (2022)	WALOWSKI, K.J., WALLACE, P.J., CLYNNE, M.A., RASMUSSEN, D.J. AND WEIS, D., 2016. SLAB MELTING AND MAGMA FORMATION BENEATH THE SOUTHERN CASCADE ARC. EARTH AND PLANETARY SCIENCE LETTERS, 446, PP.100-112.	BPB	CASCADES	42.028	-121.214	OLIVINE	87.3	900	51.97	0.87	16.21	6.46	9.97	6.8	0.84	2.94	0.23	65.4545
RASMUSSEN ET AL. (2022)	WALOWSKI, K.J., WALLACE, P.J., CLYNNE, M.A., RASMUSSEN, D.J. AND WEIS, D., 2016. SLAB MELTING AND MAGMA FORMATION BENEATH THE SOUTHERN CASCADE ARC. EARTH AND PLANETARY SCIENCE LETTERS, 446, PP.100-112.	CC	CASCADES	42.0235	-121.31	OLIVINE	89.7	900	51.04	0.91	17.42	5.34	10.57	5.71	0.9	3.39	0.17	65.8087
RASMUSSEN ET AL. (2022)	WALOWSKI, K.J., WALLACE, P.J., CLYNNE, M.A., RASMUSSEN, D.J. AND WEIS, D., 2016. SLAB MELTING AND MAGMA FORMATION BENEATH THE SOUTHERN CASCADE ARC. EARTH AND PLANETARY SCIENCE LETTERS, 446, PP.100-112.	CC	CASCADES	42.0235	-121.31	OLIVINE	89.2	900	49.89	0.95	18.12	5.39	9.49	7.15	0.85	3.46	0.18	70.4819
RASMUSSEN ET AL. (2022)	WALOWSKI, K.J., WALLACE, P.J., CLYNNE, M.A., RASMUSSEN, D.J. AND WEIS, D., 2016. SLAB MELTING AND MAGMA FORMATION BENEATH THE SOUTHERN CASCADE ARC. EARTH AND PLANETARY SCIENCE LETTERS, 446, PP.100-112.	CC	CASCADES	42.0235	-121.31	OLIVINE	90	900	50.57	0.83	16.72	5.18	10.17	8.59	0.82	2.78	0.16	74.9055
RASMUSSEN ET AL. (2022)	WALOWSKI, K.J., WALLACE, P.J., CLYNNE, M.A., RASMUSSEN, D.J. AND WEIS, D., 2016. SLAB MELTING AND MAGMA FORMATION BENEATH THE SOUTHERN CASCADE ARC. EARTH AND PLANETARY SCIENCE LETTERS, 446, PP.100-112.	CC	CASCADES	42.0235	-121.31	OLIVINE	90.1	900	51.04	0.85	17.2	4.94	10.73	5.8	0.83	3.19	0.16	67.8804
RASMUSSEN ET AL. (2022)	WALOWSKI, K.J., WALLACE, P.J., CLYNNE, M.A., RASMUSSEN, D.J. AND WEIS, D., 2016. SLAB MELTING AND MAGMA FORMATION BENEATH THE SOUTHERN CASCADE ARC. EARTH AND PLANETARY SCIENCE LETTERS, 446, PP.100-112.	CC	CASCADES	42.0235	-121.31	OLIVINE	89.6	900	51.28	0.88	17.61	5.25	10.51	5.58	0.93	3.22	0.16	65.6728
RASMUSSEN ET AL. (2022)	WALOWSKI, K.J., WALLACE, P.J., CLYNNE, M.A., RASMUSSEN, D.J. AND WEIS, D., 2016. SLAB MELTING AND MAGMA FORMATION BENEATH THE SOUTHERN CASCADE ARC. EARTH AND PLANETARY SCIENCE LETTERS, 446, PP.100-112.	CC	CASCADES	42.0235	-121.31	OLIVINE	89.9	900	51.18	0.87	17.39	5.21	10.77	5.94	0.83	3.24	0.16	67.2368
RASMUSSEN ET AL. (2022)	WALOWSKI, K.J., WALLACE, P.J., CLYNNE, M.A., RASMUSSEN, D.J. AND WEIS, D., 2016. SLAB MELTING AND MAGMA FORMATION BENEATH THE SOUTHERN CASCADE ARC. EARTH AND PLANETARY SCIENCE LETTERS, 446, PP.100-112.	BBL	CASCADES	42.026	-121.617	OLIVINE	87.8	1000	49.48	0.94	19.02	7.03	12.41	5.84	0.17	2.9	0.12	59.9248
RASMUSSEN ET AL. (2022)	WALOWSKI, K.J., WALLACE, P.J., CLYNNE, M.A., RASMUSSEN, D.J. AND WEIS, D., 2016. SLAB MELTING AND MAGMA FORMATION BENEATH THE SOUTHERN CASCADE ARC. EARTH AND PLANETARY SCIENCE LETTERS, 446, PP.100-112.	BBL	CASCADES	42.026	-121.617	OLIVINE	86.7	1000	49.14	0.95	18.87	7.6	10.98	7.05	0.3	3.14	0.16	62.5431
RASMUSSEN ET AL. (2022)	WALOWSKI, K.J., WALLACE, P.J., CLYNNE, M.A., RASMUSSEN, D.J. AND WEIS, D., 2016. SLAB MELTING AND MAGMA FORMATION BENEATH THE SOUTHERN CASCADE ARC. EARTH AND PLANETARY SCIENCE LETTERS, 446, PP.100-112.	CC	CASCADES	42.0235	-121.31	OLIVINE	90.2	1000	50.48	0.93	17.82	4.99	11.48	5.72	0.77	3.11	0.18	67.3558
RASMUSSEN ET AL. (2022)	WALOWSKI, K.J., WALLACE, P.J., CLYNNE, M.A., RASMUSSEN, D.J. AND WEIS, D., 2016. SLAB MELTING AND MAGMA FORMATION BENEATH THE SOUTHERN CASCADE ARC. EARTH AND PLANETARY SCIENCE LETTERS, 446, PP.100-112.	CC	CASCADES	42.0235	-121.31	OLIVINE	89.6	1000	50.89	0.89	17.72	5.3	10.76	5.77	0.85	3.34	0.17	66.2119
RASMUSSEN ET AL. (2022)	WALOWSKI, K.J., WALLACE, P.J., CLYNNE, M.A., RASMUSSEN, D.J. AND WEIS, D., 2016. SLAB MELTING AND MAGMA FORMATION BENEATH THE SOUTHERN CASCADE ARC. EARTH AND PLANETARY SCIENCE LETTERS, 446, PP.100-112.	CC	CASCADES	42.0235	-121.31	OLIVINE	90	1000	51.15	0.86	17.95	5.18	10.79	5.67	0.87	3.23	0.17	66.333
RASMUSSEN ET AL. (2022)	WALOWSKI, K.J., WALLACE, P.J., CLYNNE, M.A., RASMUSSEN, D.J. AND WEIS, D., 2016. SLAB MELTING AND MAGMA FORMATION BENEATH THE SOUTHERN CASCADE ARC. EARTH AND PLANETARY SCIENCE LETTERS, 446, PP.100-112.	CC	CASCADES	42.0235	-121.31	OLIVINE	90	1000	49.96	0.87	17.27	5.46	11.2	6.03	0.71	3.12	0.17	66.5318
RASMUSSEN ET AL. (2022)	WALOWSKI, K.J., WALLACE, P.J., CLYNNE, M.A., RASMUSSEN, D.J. AND WEIS, D., 2016. SLAB MELTING AND MAGMA FORMATION BENEATH THE SOUTHERN CASCADE ARC. EARTH AND PLANETARY SCIENCE LETTERS, 446, PP.100-112.	CC	CASCADES	42.0235	-121.31	OLIVINE	90	1000	50.1	0.89	17.45	5.31	11.32	6.05	0.72	3.09	0.16	67.2222
RASMUSSEN ET AL. (2022)	WALOWSKI, K.J., WALLACE, P.J., CLYNNE, M.A., RASMUSSEN, D.J. AND WEIS, D., 2016. SLAB MELTING AND MAGMA FORMATION BENEATH THE SOUTHERN CASCADE ARC. EARTH AND PLANETARY SCIENCE LETTERS, 446, PP.100-112.	BAS-44	CASCADES	42.031	-121.345	OLIVINE	87.13	1000	49.05	1.03	17.95	7.92	10.89	7.19	0.36	2.79	0.16	62.0362
RASMUSSEN ET AL. (2022)	ANDERSON, 1974, CHLORINE, SULFUR, AND WATER IN MAGMAS AND OCEANS	18	CASCADES	41.4	-122.18	OLIVINE	88	1000	51.2	0.69	18.2	5.2	10.9	5.4	0.4	3.2	0.15	65.1475
RASMUSSEN ET AL. (2022)	WALOWSKI, K.J., WALLACE, P.J., CLYNNE, M.A., RASMUSSEN, D.J. AND WEIS, D., 2016. SLAB MELTING AND MAGMA FORMATION BENEATH THE SOUTHERN CASCADE ARC. EARTH AND PLANETARY SCIENCE LETTERS, 446, PP.100-112.	BPB	CASCADES	42.028	-121.214	OLIVINE	87.7	1100	50.4	0.88	17.15	6.14	9.95	7.36	0.83	2.99	0.25	68.3309
RASMUSSEN ET AL. (2022)	WALOWSKI, K.J., WALLACE, P.J., CLYNNE, M.A., RASMUSSEN, D.J. AND WEIS, D., 2016. SLAB MELTING AND MAGMA FORMATION BENEATH THE SOUTHERN CASCADE ARC. EARTH AND PLANETARY SCIENCE LETTERS, 446, PP.100-112.	BPB	CASCADES	42.028	-121.214	OLIVINE	87	1100	49.6	0.88	17.75	6.33	9.9	6.9	0.76	2.91	0.24	66.24
RASMUSSEN ET AL. (2022)	WALOWSKI, K.J., WALLACE, P.J., CLYNNE, M.A., RASMUSSEN, D.J. AND WEIS, D., 2016. SLAB MELTING AND MAGMA FORMATION BENEATH THE SOUTHERN CASCADE ARC. EARTH AND PLANETARY SCIENCE LETTERS, 446, PP.100-112.	BPB	CASCADES	42.028	-121.214	OLIVINE	87.3	1100	51.59	0.9	16.84	6.16	10.36	6.39	0.79	2.84	0.25	65.1229
RASMUSSEN ET AL. (2022)	WALOWSKI, K.J., WALLACE, P.J., CLYNNE, M.A., RASMUSSEN, D.J. AND WEIS, D., 2016. SLAB MELTING AND MAGMA FORMATION BENEATH THE SOUTHERN CASCADE ARC. EARTH AND PLANETARY SCIENCE LETTERS, 446, PP.100-112.	BPB	CASCADES	42.028	-121.214	OLIVINE	87.2	1100	48.73	0.86	17.81	6.26	10.23	6.27	0.79	2.57	0.25	64.3224
RASMUSSEN ET AL. (2022)	WALOWSKI, K.J., WALLACE, P.J., CLYNNE, M.A., RASMUSSEN, D.J. AND WEIS, D., 2016. SLAB MELTING AND MAGMA FORMATION BENEATH THE SOUTHERN CASCADE ARC. EARTH AND PLANETARY SCIENCE LETTERS, 446, PP.100-112.	BPB	CASCADES	42.028	-121.214	OLIVINE	86.8	1100	51.07	0.9	17.13	6.33	10.42	6.07	0.8	3.17	0.26	63.3171
RASMUSSEN ET AL. (2022)	WALOWSKI, K.J., WALLACE, P.J., CLYNNE, M.A., RASMUSSEN, D.J. AND WEIS, D., 2016. SLAB MELTING AND MAGMA FORMATION BENEATH THE SOUTHERN CASCADE ARC. EARTH AND PLANETARY SCIENCE LETTERS, 446, PP.100-112.	BPPC	CASCADES	42.0262	-121.911	OLIVINE	87.8	1100	50.44	0.8	17.04	6.49	11.05	7.65	0.31	2.76	0.18	67.9664
RASMUSSEN ET AL. (2022)	WALOWSKI, K.J., WALLACE, P.J., CLYNNE, M.A., RASMUSSEN, D.J. AND WEIS, D., 2016. SLAB MELTING AND MAGMA FORMATION BENEATH THE SOUTHERN CASCADE ARC. EARTH AND PLANETARY SCIENCE LETTERS, 446, PP.100-112.	BPPC	CASCADES	42.0262	-121.911	OLIVINE	87.5	1100	49.88	0.81	16.48	6.61	11.09	7.25	0.31	2.81	0.19	66.3784
RASMUSSEN ET AL. (2022)	WALOWSKI, K.J., WALLACE, P.J., CLYNNE, M.A., RASMUSSEN, D.J. AND WEIS, D., 2016. SLAB MELTING AND MAGMA FORMATION BENEATH THE SOUTHERN CASCADE ARC. EARTH AND PLANETARY SCIENCE LETTERS, 446, PP.100-112.	BPPC	CASCADES	42.0262	-121.911	OLIVINE	86.9	1100	49.95	0.77	16.67	6.92	10.86	7.67	0.31	2.79	0.18	66.612
RASMUSSEN ET AL. (2022)	WALOWSKI, K.J., WALLACE, P.J., CLYNNE, M.A., RASMUSSEN, D.J. AND WEIS, D., 2016. SLAB MELTING AND MAGMA FORMATION BENEATH THE SOUTHERN CASCADE ARC. EARTH AND PLANETARY SCIENCE LETTERS, 446, PP.100-112.	BORG	CASCADES	42.021	-121.225	OLIVINE	88.63	1100	48.78	0.73	18.72	6.65	10.78	7.05	0.55	2.9	0.11	65.6153
RASMUSSEN ET AL. (2022)	WALOWSKI, K.J., WALLACE, P.J., CLYNNE, M.A., RASMUSSEN, D.J. AND WEIS, D., 2016. SLAB MELTING AND MAGMA FORMATION BENEATH THE SOUTHERN CASCADE ARC. EARTH AND PLANETARY SCIENCE LETTERS, 446, PP.100-112.	BORG	CASCADES	42.021	-121.225	OLIVINE	85.43	1100	48.88	0.81	18.17	7.6	9.31	6.5	0.53	3.33	0.11	60.6218
RASMUSSEN ET AL. (2022)	WALOWSKI, K.J., WALLACE, P.J., CLYNNE, M.A., RASMUSSEN, D.J. AND WEIS, D., 2016. SLAB MELTING AND MAGMA FORMATION BENEATH THE SOUTHERN CASCADE ARC. EARTH AND PLANETARY SCIENCE LETTERS, 446, PP.100-112.	BAS-44	CASCADES	42.031	-121.345	OLIVINE	87.7	1100	48	0.99	19.02	7.5	11.19	7.34	0.31	3.01	0.15	63.7891
RASMUSSEN ET AL. (2022)	WALOWSKI, K.J., WALLACE, P.J., CLYNNE, M.A., RASMUSSEN, D.J. AND WEIS, D., 2016. SLAB MELTING AND MAGMA FORMATION BENEATH THE SOUTHERN CASCADE ARC. EARTH AND PLANETARY SCIENCE LETTERS, 446, PP.100-112.	BAS-44	CASCADES	42.031	-121.345	OLIVINE	87.73	1100	50.25	1.03	17.62	8.22	11.47	7.74	0.29	1.58	0.17	62.8927
RASMUSSEN ET AL. (2022)	WALOWSKI, K.J., WALLACE, P.J., CLYNNE, M.A., RASMUSSEN, D.J. AND WEIS, D., 2016. SLAB MELTING AND MAGMA FORMATION BENEATH THE SOUTHERN CASCADE ARC. EARTH AND PLANETARY SCIENCE LETTERS, 446, PP.100-112.	BAS-44	CASCADES	42.031	-121.345	OLIVINE	87.3	1100	49.22	1	17.29	8.12	11.15	7.75	0.31	3.15	0.17	63.208
RASMUSSEN ET AL. (2022)	ANDERSON, 1974, CHLORINE, SULFUR, AND WATER IN MAGMAS AND OCEANS	10	CASCADES	41.58	-121.58	OLIVINE	87	1100	49	1.73	18.1	8.5	11.1	7.6	0.27	3		61.6772
RASMUSSEN ET AL. (2022)	ANDERSON, 1974, CHLORINE, SULFUR, AND WATER IN MAGMAS AND OCEANS	20	CASCADES	41.4	-122.18	OLIVINE	90	1100	49.1	0.56	17.4	6.1	12.2	6.8	0.25	2.3		66.7394
RASMUSSEN ET AL. (2022)	WALOWSKI, K.J., WALLACE, P.J., CLYNNE, M.A., RASMUSSEN, D.J. AND WEIS, D., 2016. SLAB MELTING AND MAGMA FORMATION BENEATH THE SOUTHERN CASCADE ARC. EARTH AND PLANETARY SCIENCE LETTERS, 446, PP.100-112.	BPB	CASCADES	42.028	-121.214	OLIVINE	87.7	1200	50.1	0.92	17.47	6.5	10.87	5.39	0.78	2.95	0.25	59.8815
RASMUSSEN ET AL. (2022)	WALOWSKI, K.J., WALLACE, P.J., CLYNNE, M.A., RASMUSSEN, D.J. AND WEIS, D., 2016. SLAB MELTING AND MAGMA FORMATION BENEATH THE SOUTHERN CASCADE ARC. EARTH AND PLANETARY SCIENCE LETTERS, 446, PP.100-112.	BPB	CASCADES	42.028	-121.214	OLIVINE	87.4	1200	50.97	0.92	17.21	6.53	10.34	6.62	0.83	2.69	0.25	64.5994
RASMUSSEN ET AL. (2022)	WALOWSKI, K.J., WALLACE, P.J., CLYNNE, M.A., RASMUSSEN, D.J. AND WEIS, D., 2016. SLAB MELTING AND MAGMA FORMATION BENEATH THE SOUTHERN CASCADE ARC. EARTH AND PLANETARY SCIENCE LETTERS, 446, PP.100-112.	BPPC	CASCADES	42.0262	-121.911	OLIVINE	87	1200	50.64	0.79	16.65	7.18	10.94	7.54	0.31	2.75	0.18	65.4009
RASMUSSEN ET AL. (2022)	WALOWSKI, K.J., WALLACE, P.J., CLYNNE, M.A., RASMUSSEN, D.J. AND WEIS, D., 2016. SLAB MELTING AND MAGMA FORMATION BENEATH THE SOUTHERN CASCADE ARC. EARTH AND PLANETARY SCIENCE LETTERS, 446, PP.100-112.	BPPC	CASCADES	42.0262	-121.911	OLIVINE	87.8	1200	50.35	0.77	17.98	6.28	11.94	5.17	0.26	2.79	0.19	59.7074
RASMUSSEN ET AL. (2022)	WALOWSKI, K.J., WALLACE, P.J., CLYNNE, M.A., RASMUSSEN, D.J. AND WEIS, D., 2016. SLAB MELTING AND MAGMA FORMATION BENEATH THE SOUTHERN CASCADE ARC. EARTH AND PLANETARY SCIENCE LETTERS, 446, PP.100-112.	BPPC	CASCADES	42.0262	-121.911	OLIVINE	87.2	1200	49.95	0.79	16.36	7.04	10.7	7.82	0.33	2.71	0.19	66.6604
RASMUSSEN ET AL. (2022)	WALOWSKI, K.J., WALLACE, P.J., CLYNNE, M.A., RASMUSSEN, D.J. AND WEIS, D., 2016. SLAB MELTING AND MAGMA FORMATION BENEATH THE SOUTHERN CASCADE ARC. EARTH AND PLANETARY SCIENCE LETTERS, 446, PP.100-112.	BPPC	CASCADES	42.0262	-121.911	OLIVINE	87.3	1200	49.98	0.8	16.76	6.79	11.19	7.36	0.31	2.73	0.19	66.1144
RASMUSSEN ET AL. (2022)	WALOWSKI, K.J., WALLACE, P.J., CLYNNE, M.A., RASMUSSEN, D.J. AND WEIS, D., 2016. SLAB MELTING AND MAGMA FORMATION BENEATH THE SOUTHERN CASCADE ARC. EARTH AND PLANETARY SCIENCE LETTERS, 446, PP.100-112.	BPPC	CASCADES	42.0262	-121.911	OLIVINE	87.3	1200	50.03	0.77	16.63	6.95	10.82	7.91	0.35	2.68	0.19	67.1984
RASMUSSEN ET AL. (2022)	WALOWSKI, K.J., WALLACE, P.J., CLYNNE, M.A., RASMUSSEN, D.J. AND WEIS, D., 2016. SLAB MELTING AND MAGMA FORMATION BENEATH THE SOUTHERN CASCADE ARC. EARTH AND PLANETARY SCIENCE LETTERS, 446, PP.100-112.	BPPC	CASCADES	42.0262	-121.911	OLIVINE	87.5	1200	49.96	0.83	16.87	6.54	11.16	6.44	0.33	2.89	0.18	63.9312
RASMUSSEN ET AL. (2022)	WALOWSKI, K.J., WALLACE, P.J., CLYNNE, M.A., RASMUSSEN, D.J. AND WEIS, D., 2016. SLAB MELTING AND MAGMA FORMATION BENEATH THE SOUTHERN CASCADE ARC. EARTH AND PLANETARY SCIENCE LETTERS, 446, PP.100-112.	BPPC	CASCADES	42.0262	-121.911	OLIVINE	86.4	1200	50.15	0.76	15.33	7.15	11.3	6.87	0.3	2.62	0.21	63.3634
RASMUSSEN ET AL. (2022)	WALOWSKI, K.J., WALLACE, P.J., CLYNNE, M.A., RASMUSSEN, D.J. AND WEIS, D., 2016. SLAB MELTING AND MAGMA FORMATION BENEATH THE SOUTHERN CASCADE ARC. EARTH AND PLANETARY SCIENCE LETTERS, 446, PP.100-112.	BPPC	CASCADES	42.0262	-121.911	OLIVINE	87.5	1200	50.74	0.83	17.5	6.43	11.16	7.06	0.31	2.83	0.19	66.4019
RASMUSSEN ET AL. (2022)	WALOWSKI, K.J., WALLACE, P.J., CLYNNE, M.A., RASMUSSEN, D.J. AND WEIS, D., 2016. SLAB MELTING AND MAGMA FORMATION BENEATH THE SOUTHERN CASCADE ARC. EARTH AND PLANETARY SCIENCE LETTERS, 446, PP.100-112.	BORG	CASCADES	42.021	-121.225	OLIVINE	88.43	1200	48.88	0.73	18.32	6.27	10.89	6.92	0.52	2.71	0.08	66.5171
RASMUSSEN ET AL. (2022)	WALOWSKI, K.J., WALLACE, P.J., CLYNNE, M.A., RASMUSSEN, D.J. AND WEIS, D., 2016. SLAB MELTING AND MAGMA FORMATION BENEATH THE SOUTHERN CASCADE ARC. EARTH AND PLANETARY SCIENCE LETTERS, 446, PP.100-112.	BAS-44	CASCADES	42.031	-121.345	OLIVINE	87.4	1200	49.66	1.01	17.73	8	11.16	7.78	0.28	3	0.18	63.643
RASMUSSEN ET AL. (2022)	WALOWSKI, K.J., WALLACE, P.J., CLYNNE, M.A., RASMUSSEN, D.J. AND WEIS, D., 2016. SLAB MELTING AND MAGMA FORMATION BENEATH THE SOUTHERN CASCADE ARC. EARTH AND PLANETARY SCIENCE LETTERS, 446, PP.100-112.	BAS-44	CASCADES	42.031	-121.345	OLIVINE	88.2	1200	48.83	1.04	18.19	7.83	11.43	7.51	0.28	2.94	0.17	63.3221
RASMUSSEN ET AL. (2022)	WALOWSKI, K.J., WALLACE, P.J., CLYNNE, M.A., RASMUSSEN, D.J. AND WEIS, D., 2016. SLAB MELTING AND MAGMA FORMATION BENEATH THE SOUTHERN CASCADE ARC. EARTH AND PLANETARY SCIENCE LETTERS, 446, PP.100-112.	BAS-44	CASCADES	42.031	-121.345	OLIVINE	87.73	1200	50.17	1.01	16.98	8.04	11.1	7.58	0.34	3.12	0.17	62.922
RASMUSSEN ET AL. (2022)	WALOWSKI, K.J., WALLACE, P.J., CLYNNE, M.A., RASMUSSEN, D.J. AND WEIS, D., 2016. SLAB MELTING AND MAGMA FORMATION BENEATH THE SOUTHERN CASCADE ARC. EARTH AND PLANETARY SCIENCE LETTERS, 446, PP.100-112.	BAS-44	CASCADES	42.031	-121.345	OLIVINE	87.73	1200	49.84	1.03	17.76	8.03	11.34	7.58	0.3	3.13	0.16	62.951
RASMUSSEN ET AL. (2022)	WALOWSKI, K.J., WALLACE, P.J., CLYNNE, M.A., RASMUSSEN, D.J. AND WEIS, D., 2016. SLAB MELTING AND MAGMA FORMATION BENEATH THE SOUTHERN CASCADE ARC. EARTH AND PLANETARY SCIENCE LETTERS, 446, PP.100-112.	BAS-44	CASCADES	42.031	-121.345	OLIVINE	87.67	1200	49.59	0.99	17.6	7.82	11.27	7.72	0.29	2.71	0.17	63.9897
RASMUSSEN ET AL. (2022)	WALOWSKI, K.J., WALLACE, P.J., CLYNNE, M.A., RASMUSSEN, D.J. AND WEIS, D., 2016. SLAB MELTING AND MAGMA FORMATION BENEATH THE SOUTHERN CASCADE ARC. EARTH AND PLANETARY SCIENCE LETTERS, 446, PP.100-112.	BAS-44	CASCADES	42.031	-121.345	OLIVINE	88.1	1200	48.91	1.01	17.46	7.8	11.09	7.9	0.31	3.01	0.16	64.5777
RASMUSSEN ET AL. (2022)	WALOWSKI, K.J., WALLACE, P.J., CLYNNE, M.A., RASMUSSEN, D.J. AND WEIS, D., 2016. SLAB MELTING AND MAGMA FORMATION BENEATH THE SOUTHERN CASCADE ARC. EARTH AND PLANETARY SCIENCE LETTERS, 446, PP.100-112.	BAS-44	CASCADES	42.031	-121.345	OLIVINE	88.3	1200	49.67	0.99	17.15	7.94	10.72	8.33	0.29	3.21	0.17	65.3789
RASMUSSEN ET AL. (2022)	WALOWSKI, K.J., WALLACE, P.J., CLYNNE, M.A., RASMUSSEN, D.J. AND WEIS, D., 2016. SLAB MELTING AND MAGMA FORMATION BENEATH THE SOUTHERN CASCADE ARC. EARTH AND PLANETARY SCIENCE LETTERS, 446, PP.100-112.	BAS-44	CASCADES	42.031	-121.345	OLIVINE	87.57	1200	49.27	1.01	17.15	7.76	11.24	7.39	0.31	3.06	0.17	63.1564
RASMUSSEN ET AL. (2022)	WALOWSKI, K.J., WALLACE, P.J., CLYNNE, M.A., RASMUSSEN, D.J. AND WEIS, D., 2016. SLAB MELTING AND MAGMA FORMATION BENEATH THE SOUTHERN CASCADE ARC. EARTH AND PLANETARY SCIENCE LETTERS, 446, PP.100-112.	BAS-44	CASCADES	42.031	-121.345	OLIVINE	88.03	1200	48.61	0.98	17.4	7.74	11.02	7.83	0.29	2.95	0.15	64.5507
RASMUSSEN ET AL. (2022)	WALOWSKI, K.J., WALLACE, P.J., CLYNNE, M.A., RASMUSSEN, D.J. AND WEIS, D., 2016. SLAB MELTING AND MAGMA FORMATION BENEATH THE SOUTHERN CASCADE ARC. EARTH AND PLANETARY SCIENCE LETTERS, 446, PP.100-112.	BAS-44	CASCADES	42.031	-121.345	OLIVINE	87.73	1200	49.53	0.99	17.4	7.91	11.13	7.39	0.31	2.95	0.17	62.7098
RASMUSSEN ET AL. (2022)	WALOWSKI, K.J., WALLACE, P.J., CLYNNE, M.A., RASMUSSEN, D.J. AND WEIS, D., 2016. SLAB MELTING AND MAGMA FORMATION BENEATH THE SOUTHERN CASCADE ARC. EARTH AND PLANETARY SCIENCE LETTERS, 446, PP.100-112.	BAS-44	CASCADES	42.031	-121.345	OLIVINE	87.53	1200	49	1.03	17.68	7.66	11.26	7.43	0.3	2.98	0.17	63.5828
RASMUSSEN ET AL. (2022)	WALOWSKI, K.J., WALLACE, P.J., CLYNNE, M.A., RASMUSSEN, D.J. AND WEIS, D., 2016. SLAB MELTING AND MAGMA FORMATION BENEATH THE SOUTHERN CASCADE ARC. EARTH AND PLANETARY SCIENCE LETTERS, 446, PP.100-112.	BPPC	CASCADES	42.0262	-121.911	OLIVINE	87.5	1300	48.75	0.75	16.54	7.14	11.45	7.7	0.19	2.36	0.16	66
RASMUSSEN ET AL. (2022)	WALOWSKI, K.J., WALLACE, P.J., CLYNNE, M.A., RASMUSSEN, D.J. AND WEIS, D., 2016. SLAB MELTING AND MAGMA FORMATION BENEATH THE SOUTHERN CASCADE ARC. EARTH AND PLANETARY SCIENCE LETTERS, 446, PP.100-112.	BPPC	CASCADES	42.0262	-121.911	OLIVINE	87	1300	50.09	0.82	16.78	7.55	11.16	7.43	0.36	2.86	0.19	63.917
RASMUSSEN ET AL. (2022)	WALOWSKI, K.J., WALLACE, P.J., CLYNNE, M.A., RASMUSSEN, D.J. AND WEIS, D., 2016. SLAB MELTING AND MAGMA FORMATION BENEATH THE SOUTHERN CASCADE ARC. EARTH AND PLANETARY SCIENCE LETTERS, 446, PP.100-112.	BORG	CASCADES	42.021	-121.225	OLIVINE	88.17	1300	49.23	0.77	17.66	6.57	10.86	6.88	0.56	2.7	0.09	65.3371
RASMUSSEN ET AL. (2022)	WALOWSKI, K.J., WALLACE, P.J., CLYNNE, M.A., RASMUSSEN, D.J. AND WEIS, D., 2016. SLAB MELTING AND MAGMA FORMATION BENEATH THE SOUTHERN CASCADE ARC. EARTH AND PLANETARY SCIENCE LETTERS, 446, PP.100-112.	BORG	CASCADES	42.021	-121.225	OLIVINE	88.47	1300	48.79	0.7	17.8	6.62	10.92	7.17	0.53	2.63	0.08	66.0965
RASMUSSEN ET AL. (2022)	WALOWSKI, K.J., WALLACE, P.J., CLYNNE, M.A., RASMUSSEN, D.J. AND WEIS, D., 2016. SLAB MELTING AND MAGMA FORMATION BENEATH THE SOUTHERN CASCADE ARC. EARTH AND PLANETARY SCIENCE LETTERS, 446, PP.100-112.	BORG	CASCADES	42.021	-121.225	OLIVINE	88.03	1300	50.36	0.81	17.63	6.27	11.37	6.17	0.54	2.7	0.12	63.9157
RASMUSSEN ET AL. (2022)	WALOWSKI, K.J., WALLACE, P.J., CLYNNE, M.A., RASMUSSEN, D.J. AND WEIS, D., 2016. SLAB MELTING AND MAGMA FORMATION BENEATH THE SOUTHERN CASCADE ARC. EARTH AND PLANETARY SCIENCE LETTERS, 446, PP.100-112.	BORG	CASCADES	42.021	-121.225	OLIVINE	89.13	1300	49.63	0.81	18.19	6.05	12.28	6.31	0.44	2.7	0.1	65.2459
RASMUSSEN ET AL. (2022)	WALOWSKI, K.J., WALLACE, P.J., CLYNNE, M.A., RASMUSSEN, D.J. AND WEIS, D., 2016. SLAB MELTING AND MAGMA FORMATION BENEATH THE SOUTHERN CASCADE ARC. EARTH AND PLANETARY SCIENCE LETTERS, 446, PP.100-112.	BORG	CASCADES	42.021	-121.225	OLIVINE	89.13	1300	49.93	0.77	18.38	6	12.07	6.84	0.45	2.83	0.1	67.2346
RASMUSSEN ET AL. (2022)	WALOWSKI, K.J., WALLACE, P.J., CLYNNE, M.A., RASMUSSEN, D.J. AND WEIS, D., 2016. SLAB MELTING AND MAGMA FORMATION BENEATH THE SOUTHERN CASCADE ARC. EARTH AND PLANETARY SCIENCE LETTERS, 446, PP.100-112.	BORG	CASCADES	42.021	-121.225	OLIVINE	87.87	1300	50.8	0.84	17.99	6.29	11.31	5.55	0.54	2.8	0.12	61.3636
RASMUSSEN ET AL. (2022)	WALOWSKI, K.J., WALLACE, P.J., CLYNNE, M.A., RASMUSSEN, D.J. AND WEIS, D., 2016. SLAB MELTING AND MAGMA FORMATION BENEATH THE SOUTHERN CASCADE ARC. EARTH AND PLANETARY SCIENCE LETTERS, 446, PP.100-112.	BAS-44	CASCADES	42.031	-121.345	OLIVINE	87.53	1300	48.33	1	17.83	7.51	11.21	7.49	0.31	2.98	0.16	64.2245
RASMUSSEN ET AL. (2022)	WALOWSKI, K.J., WALLACE, P.J., CLYNNE, M.A., RASMUSSEN, D.J. AND WEIS, D., 2016. SLAB MELTING AND MAGMA FORMATION BENEATH THE SOUTHERN CASCADE ARC. EARTH AND PLANETARY SCIENCE LETTERS, 446, PP.100-112.	BAS-44	CASCADES	42.031	-121.345	OLIVINE	87.77	1300	48.62	1.03	17.59	7.68	11.27	7.52	0.29	2.96	0.16	63.8009
RASMUSSEN ET AL. (2022)	WALOWSKI, K.J., WALLACE, P.J., CLYNNE, M.A., RASMUSSEN, D.J. AND WEIS, D., 2016. SLAB MELTING AND MAGMA FORMATION BENEATH THE SOUTHERN CASCADE ARC. EARTH AND PLANETARY SCIENCE LETTERS, 446, PP.100-112.	BORG	CASCADES	42.021	-121.225	OLIVINE	88.4	1400	49.53	0.78	19.49	6.26	11.89	5.15	0.53	2.82	0.1	59.6909
RASMUSSEN ET AL. (2022)	RUSCITTO, D.M., WALLACE, P.J. AND KENT, A.J.R., 2011. REVISITING THE COMPOSITIONS AND VOLATILE CONTENTS OF OLIVINE-HOSTED MELT INCLUSIONS FROM THE MOUNT SHASTA REGION: IMPLICATIONS FOR THE FORMATION OF HIGH-MG ANDESITES. CONTRIBUTIONS TO MINERALOGY AND PETROLOGY, 162(1), PP.109-132.	S173	CASCADES	41.666	-122.03	OLIVINE	93.3	1420	54.31	0.72	16.15	3.78	13.21	5.8	0.44	3.04	0.4	73.4177
RASMUSSEN ET AL. (2022)	RUSCITTO, D.M., WALLACE, P.J. AND KENT, A.J.R., 2011. REVISITING THE COMPOSITIONS AND VOLATILE CONTENTS OF OLIVINE-HOSTED MELT INCLUSIONS FROM THE MOUNT SHASTA REGION: IMPLICATIONS FOR THE FORMATION OF HIGH-MG ANDESITES. CONTRIBUTIONS TO MINERALOGY AND PETROLOGY, 162(1), PP.109-132.	S173	CASCADES	41.666	-122.03	OLIVINE	93.1	1480	54.66	0.71	15.6	4.29	12.31	6.38	0.43	2.52	0.35	72.8033
RASMUSSEN ET AL. (2022)	RUSCITTO, D.M., WALLACE, P.J. AND KENT, A.J.R., 2011. REVISITING THE COMPOSITIONS AND VOLATILE CONTENTS OF OLIVINE-HOSTED MELT INCLUSIONS FROM THE MOUNT SHASTA REGION: IMPLICATIONS FOR THE FORMATION OF HIGH-MG ANDESITES. CONTRIBUTIONS TO MINERALOGY AND PETROLOGY, 162(1), PP.109-132.	S173	CASCADES	41.666	-122.03	OLIVINE	93.3	1510	55.32	0.59	15.51	3.73	12.49	6.49	0.38	2.42	0.18	75.7981
RASMUSSEN ET AL. (2022)	RUSCITTO, D.M., WALLACE, P.J. AND KENT, A.J.R., 2011. REVISITING THE COMPOSITIONS AND VOLATILE CONTENTS OF OLIVINE-HOSTED MELT INCLUSIONS FROM THE MOUNT SHASTA REGION: IMPLICATIONS FOR THE FORMATION OF HIGH-MG ANDESITES. CONTRIBUTIONS TO MINERALOGY AND PETROLOGY, 162(1), PP.109-132.	S173	CASCADES	41.666	-122.03	OLIVINE	93.5	1860	54.41	0.65	14.09	4.07	11.8	7.17	0.38	1.94	0.32	76.025
RASMUSSEN ET AL. (2022)	RUSCITTO, D.M., WALLACE, P.J. AND KENT, A.J.R., 2011. REVISITING THE COMPOSITIONS AND VOLATILE CONTENTS OF OLIVINE-HOSTED MELT INCLUSIONS FROM THE MOUNT SHASTA REGION: IMPLICATIONS FOR THE FORMATION OF HIGH-MG ANDESITES. CONTRIBUTIONS TO MINERALOGY AND PETROLOGY, 162(1), PP.109-132.	MS-1404	CASCADES	41.666	-122.03	OLIVINE	93.5	1920	54.1	0.75	17.09	4.33	13.4	5.18	0.38	2.76	0.37	68.2877
RASMUSSEN ET AL. (2022)	RUSCITTO, D.M., WALLACE, P.J. AND KENT, A.J.R., 2011. REVISITING THE COMPOSITIONS AND VOLATILE CONTENTS OF OLIVINE-HOSTED MELT INCLUSIONS FROM THE MOUNT SHASTA REGION: IMPLICATIONS FOR THE FORMATION OF HIGH-MG ANDESITES. CONTRIBUTIONS TO MINERALOGY AND PETROLOGY, 162(1), PP.109-132.	MS-1404	CASCADES	41.666	-122.03	OLIVINE	93.5	2000	55.86	0.65	13.34	3.94	11.9	7.52	0.35	2.05	0.32	77.4548
RASMUSSEN ET AL. (2022)	RUSCITTO, D.M., WALLACE, P.J. AND KENT, A.J.R., 2011. REVISITING THE COMPOSITIONS AND VOLATILE CONTENTS OF OLIVINE-HOSTED MELT INCLUSIONS FROM THE MOUNT SHASTA REGION: IMPLICATIONS FOR THE FORMATION OF HIGH-MG ANDESITES. CONTRIBUTIONS TO MINERALOGY AND PETROLOGY, 162(1), PP.109-132.	S173	CASCADES	41.666	-122.03	OLIVINE	93.4	2020	53.85	0.68	15.05	3.91	12.32	7.01	0.37	2.02	0.34	76.3432
RASMUSSEN ET AL. (2022)	RUSCITTO, D.M., WALLACE, P.J. AND KENT, A.J.R., 2011. REVISITING THE COMPOSITIONS AND VOLATILE CONTENTS OF OLIVINE-HOSTED MELT INCLUSIONS FROM THE MOUNT SHASTA REGION: IMPLICATIONS FOR THE FORMATION OF HIGH-MG ANDESITES. CONTRIBUTIONS TO MINERALOGY AND PETROLOGY, 162(1), PP.109-132.	MS-1404	CASCADES	41.666	-122.03	OLIVINE	93.5	2080	54.71	0.66	14.45	3.74	12.2	7.44	0.33	2.01	0.33	78.1695
RASMUSSEN ET AL. (2022)	RUSCITTO, D.M., WALLACE, P.J. AND KENT, A.J.R., 2011. REVISITING THE COMPOSITIONS AND VOLATILE CONTENTS OF OLIVINE-HOSTED MELT INCLUSIONS FROM THE MOUNT SHASTA REGION: IMPLICATIONS FOR THE FORMATION OF HIGH-MG ANDESITES. CONTRIBUTIONS TO MINERALOGY AND PETROLOGY, 162(1), PP.109-132.	S173	CASCADES	41.666	-122.03	OLIVINE	93.4	2090	54.17	0.68	14.63	4.1	12.58	5.84	0.35	1.56	0.35	71.9409
RASMUSSEN ET AL. (2022)	WALOWSKI, K.J., WALLACE, P.J., CLYNNE, M.A., RASMUSSEN, D.J. AND WEIS, D., 2016. SLAB MELTING AND MAGMA FORMATION BENEATH THE SOUTHERN CASCADE ARC. EARTH AND PLANETARY SCIENCE LETTERS, 446, PP.100-112.	BORG	CASCADES	42.021	-121.225	OLIVINE	86.1	2200	49.33	0.89	18.73	7.42	9.12	6.34	0.57	3.36	0.11	60.599
RASMUSSEN ET AL. (2022)	RUSCITTO, D.M., WALLACE, P.J. AND KENT, A.J.R., 2011. REVISITING THE COMPOSITIONS AND VOLATILE CONTENTS OF OLIVINE-HOSTED MELT INCLUSIONS FROM THE MOUNT SHASTA REGION: IMPLICATIONS FOR THE FORMATION OF HIGH-MG ANDESITES. CONTRIBUTIONS TO MINERALOGY AND PETROLOGY, 162(1), PP.109-132.	MS-1304	CASCADES	41.666	-122.03	OLIVINE	93.3	2200	55.17	0.6	14.69	4.48	11.55	7.51	0.29	0.98	0.31	75.1083
RASMUSSEN ET AL. (2022)	RUSCITTO, D.M., WALLACE, P.J. AND KENT, A.J.R., 2011. REVISITING THE COMPOSITIONS AND VOLATILE CONTENTS OF OLIVINE-HOSTED MELT INCLUSIONS FROM THE MOUNT SHASTA REGION: IMPLICATIONS FOR THE FORMATION OF HIGH-MG ANDESITES. CONTRIBUTIONS TO MINERALOGY AND PETROLOGY, 162(1), PP.109-132.	MS-1404	CASCADES	41.666	-122.03	OLIVINE	93.6	2200	54.08	0.65	14.26	4.45	11.9	7.13	0.3	1.64	0.33	74.2536
RASMUSSEN ET AL. (2022)	RUSCITTO, D.M., WALLACE, P.J. AND KENT, A.J.R., 2011. REVISITING THE COMPOSITIONS AND VOLATILE CONTENTS OF OLIVINE-HOSTED MELT INCLUSIONS FROM THE MOUNT SHASTA REGION: IMPLICATIONS FOR THE FORMATION OF HIGH-MG ANDESITES. CONTRIBUTIONS TO MINERALOGY AND PETROLOGY, 162(1), PP.109-132.	S173	CASCADES	41.666	-122.03	OLIVINE	93.4	2300	54.05	0.69	15.18	4.61	9.52	6.95	0.55	2	0.3	73.0724
RASMUSSEN ET AL. (2022)	ANDERSON, 1974, CHLORINE, SULFUR, AND WATER IN MAGMAS AND OCEANS	22	CASCADES	41.4	-122.18	OLIVINE	93	2500	54.5	0.85	15.1	4.5	12.1	6.7	0.27	1.9		72.8261
RASMUSSEN ET AL. (2022)	ANDERSON, 1974, CHLORINE, SULFUR, AND WATER IN MAGMAS AND OCEANS	23	CASCADES	41.4	-122.18	OLIVINE	91.8	3000	53.8	0.59	13.2	4.4	12.2	5	0.26	2.1		67.1642
RASMUSSEN ET AL. (2022)	ROWE, M.C., KENT, A.J. AND NIELSEN, R.L., 2009. SUBDUCTION INFLUENCE ON OXYGEN FUGACITY AND TRACE AND VOLATILE ELEMENTS IN BASALTS ACROSS THE CASCADE VOLCANIC ARC. JOURNAL OF PETROLOGY, 50(1), PP.61-91.	BC02-1	CASCADIA	44.014	-121.699	OLIVINE	85.8781	674	48.9116	1.3696	17.9527	9.4225	9.6045	8.9982	0.4916	3.2615	0.3488	63.221
RASMUSSEN ET AL. (2022)	ROWE, M.C., KENT, A.J. AND NIELSEN, R.L., 2009. SUBDUCTION INFLUENCE ON OXYGEN FUGACITY AND TRACE AND VOLATILE ELEMENTS IN BASALTS ACROSS THE CASCADE VOLCANIC ARC. JOURNAL OF PETROLOGY, 50(1), PP.61-91.	CC02-1	CASCADIA	44.059	-121.713	OLIVINE	87.4021	690	50.2197	1.0178	17.1145	7.7493	9.365	9.0041	0.6888	3.2836	0.1973	67.6529
RASMUSSEN ET AL. (2022)	ROWE, M.C., KENT, A.J. AND NIELSEN, R.L., 2009. SUBDUCTION INFLUENCE ON OXYGEN FUGACITY AND TRACE AND VOLATILE ELEMENTS IN BASALTS ACROSS THE CASCADE VOLCANIC ARC. JOURNAL OF PETROLOGY, 50(1), PP.61-91.	CC02-1	CASCADIA	44.059	-121.713	OLIVINE	86.8358	715	50.6673	1.0558	18.1436	8.4287	10.3568	8.4435	0.5855	3.159	0.1872	64.326
RASMUSSEN ET AL. (2022)	ROWE, M.C., KENT, A.J. AND NIELSEN, R.L., 2009. SUBDUCTION INFLUENCE ON OXYGEN FUGACITY AND TRACE AND VOLATILE ELEMENTS IN BASALTS ACROSS THE CASCADE VOLCANIC ARC. JOURNAL OF PETROLOGY, 50(1), PP.61-91.	CC02-1	CASCADIA	44.059	-121.713	OLIVINE	87.5068	719	47.0994	1.0199	22.9684	7.1341	9.979	6.7729	0.5749	2.8004	0.2181	63.0842
RASMUSSEN ET AL. (2022)	ROWE, M.C., KENT, A.J. AND NIELSEN, R.L., 2009. SUBDUCTION INFLUENCE ON OXYGEN FUGACITY AND TRACE AND VOLATILE ELEMENTS IN BASALTS ACROSS THE CASCADE VOLCANIC ARC. JOURNAL OF PETROLOGY, 50(1), PP.61-91.	CC02-1	CASCADIA	44.059	-121.713	OLIVINE	88.2273	741	50.4231	1.0472	17.5717	7.6877	9.8616	8.9703	0.6126	3.0662	0.1675	67.7451
RASMUSSEN ET AL. (2022)	ROWE, M.C., KENT, A.J. AND NIELSEN, R.L., 2009. SUBDUCTION INFLUENCE ON OXYGEN FUGACITY AND TRACE AND VOLATILE ELEMENTS IN BASALTS ACROSS THE CASCADE VOLCANIC ARC. JOURNAL OF PETROLOGY, 50(1), PP.61-91.	CC02-1	CASCADIA	44.059	-121.713	OLIVINE	88.0958	746	49.6341	1.0237	17.6141	8.5987	9.8532	9.4391	0.5582	3.0174	0.2127	66.397
RASMUSSEN ET AL. (2022)	ROWE, M.C., KENT, A.J. AND NIELSEN, R.L., 2009. SUBDUCTION INFLUENCE ON OXYGEN FUGACITY AND TRACE AND VOLATILE ELEMENTS IN BASALTS ACROSS THE CASCADE VOLCANIC ARC. JOURNAL OF PETROLOGY, 50(1), PP.61-91.	CC02-1	CASCADIA	44.059	-121.713	OLIVINE	88.319	756	50.8112	1.0411	18.2329	7.7425	10.1918	9.3572	0.5767	3.2384	0.1789	68.5078
RASMUSSEN ET AL. (2022)	ROWE, M.C., KENT, A.J. AND NIELSEN, R.L., 2009. SUBDUCTION INFLUENCE ON OXYGEN FUGACITY AND TRACE AND VOLATILE ELEMENTS IN BASALTS ACROSS THE CASCADE VOLCANIC ARC. JOURNAL OF PETROLOGY, 50(1), PP.61-91.	BC02-1	CASCADIA	44.014	-121.699	OLIVINE	85.216	773	48.7972	1.42	17.7291	10.5208	9.3495	8.8505	0.5843	3.3625	0.3779	60.2264
RASMUSSEN ET AL. (2022)	ROWE, M.C., KENT, A.J. AND NIELSEN, R.L., 2009. SUBDUCTION INFLUENCE ON OXYGEN FUGACITY AND TRACE AND VOLATILE ELEMENTS IN BASALTS ACROSS THE CASCADE VOLCANIC ARC. JOURNAL OF PETROLOGY, 50(1), PP.61-91.	BC02-1	CASCADIA	44.014	-121.699	OLIVINE	85.3045	781	48.8673	1.3642	16.9228	10.8118	8.9855	10.9548	0.5381	3.2678	0.2524	64.5868
RASMUSSEN ET AL. (2022)	ROWE, M.C., KENT, A.J. AND NIELSEN, R.L., 2009. SUBDUCTION INFLUENCE ON OXYGEN FUGACITY AND TRACE AND VOLATILE ELEMENTS IN BASALTS ACROSS THE CASCADE VOLCANIC ARC. JOURNAL OF PETROLOGY, 50(1), PP.61-91.	HL03-1	CASCADIA	44.782	-121.777	OLIVINE	85.2912	789	49.2774	2.0469	17.4163	7.8415	10.5631	7.7006	0.7471	4.1005	0.3993	63.8684
RASMUSSEN ET AL. (2022)	ROWE, M.C., KENT, A.J. AND NIELSEN, R.L., 2009. SUBDUCTION INFLUENCE ON OXYGEN FUGACITY AND TRACE AND VOLATILE ELEMENTS IN BASALTS ACROSS THE CASCADE VOLCANIC ARC. JOURNAL OF PETROLOGY, 50(1), PP.61-91.	CC02-1	CASCADIA	44.059	-121.713	OLIVINE	86.72	813	50.5428	1.0626	16.8756	9.2509	9.4683	11.4847	0.5603	2.9683	0.1983	69.0847
RASMUSSEN ET AL. (2022)	ROWE, M.C., KENT, A.J. AND NIELSEN, R.L., 2009. SUBDUCTION INFLUENCE ON OXYGEN FUGACITY AND TRACE AND VOLATILE ELEMENTS IN BASALTS ACROSS THE CASCADE VOLCANIC ARC. JOURNAL OF PETROLOGY, 50(1), PP.61-91.	HL03-1	CASCADIA	44.782	-121.777	OLIVINE	85.7951	813	48.6384	1.8798	16.2868	8.3549	12.1431	8.0693	0.7842	4.3174	0.4046	63.4833
RASMUSSEN ET AL. (2022)	ROWE, M.C., KENT, A.J. AND NIELSEN, R.L., 2009. SUBDUCTION INFLUENCE ON OXYGEN FUGACITY AND TRACE AND VOLATILE ELEMENTS IN BASALTS ACROSS THE CASCADE VOLCANIC ARC. JOURNAL OF PETROLOGY, 50(1), PP.61-91.	CC02-1	CASCADIA	44.059	-121.713	OLIVINE	87.482	823	50.9693	1.0528	18.7834	7.5776	10.1899	8.2108	0.6036	3.3902	0.2023	66.1064
RASMUSSEN ET AL. (2022)	ROWE, M.C., KENT, A.J. AND NIELSEN, R.L., 2009. SUBDUCTION INFLUENCE ON OXYGEN FUGACITY AND TRACE AND VOLATILE ELEMENTS IN BASALTS ACROSS THE CASCADE VOLCANIC ARC. JOURNAL OF PETROLOGY, 50(1), PP.61-91.	CC02-1	CASCADIA	44.059	-121.713	OLIVINE	87.2997	857	50.2244	1.1762	19.0838	7.7464	11.0705	7.5295	0.6298	3.3889	0.2386	63.6311
RASMUSSEN ET AL. (2022)	ROWE, M.C., KENT, A.J. AND NIELSEN, R.L., 2009. SUBDUCTION INFLUENCE ON OXYGEN FUGACITY AND TRACE AND VOLATILE ELEMENTS IN BASALTS ACROSS THE CASCADE VOLCANIC ARC. JOURNAL OF PETROLOGY, 50(1), PP.61-91.	CC02-1	CASCADIA	44.059	-121.713	OLIVINE	86.8045	859	50.037	1.0076	17.8468	8.8367	9.7727	8.4839	0.5928	3.1009	0.1909	63.3449
RASMUSSEN ET AL. (2022)	ROWE, M.C., KENT, A.J. AND NIELSEN, R.L., 2009. SUBDUCTION INFLUENCE ON OXYGEN FUGACITY AND TRACE AND VOLATILE ELEMENTS IN BASALTS ACROSS THE CASCADE VOLCANIC ARC. JOURNAL OF PETROLOGY, 50(1), PP.61-91.	HL03-1	CASCADIA	44.782	-121.777	OLIVINE	85.9344	863	49.0652	2.0371	16.1258	8.5652	10.8396	8.0717	0.7556	4.0372	0.3913	62.912
RASMUSSEN ET AL. (2022)	ROWE, M.C., KENT, A.J. AND NIELSEN, R.L., 2009. SUBDUCTION INFLUENCE ON OXYGEN FUGACITY AND TRACE AND VOLATILE ELEMENTS IN BASALTS ACROSS THE CASCADE VOLCANIC ARC. JOURNAL OF PETROLOGY, 50(1), PP.61-91.	CC02-1	CASCADIA	44.059	-121.713	OLIVINE	86.8565	879	47.2591	1.0224	18.351	9.9428	10.0703	8.4736	0.6245	3.0068	0.2081	60.5371
RASMUSSEN ET AL. (2022)	ROWE, M.C., KENT, A.J. AND NIELSEN, R.L., 2009. SUBDUCTION INFLUENCE ON OXYGEN FUGACITY AND TRACE AND VOLATILE ELEMENTS IN BASALTS ACROSS THE CASCADE VOLCANIC ARC. JOURNAL OF PETROLOGY, 50(1), PP.61-91.	CC02-1	CASCADIA	44.059	-121.713	OLIVINE	87.1477	886	50.3515	1.1481	17.5527	9.2681	9.5699	10.3211	0.5926	3.1506	0.2114	66.7167
RASMUSSEN ET AL. (2022)	ROWE, M.C., KENT, A.J. AND NIELSEN, R.L., 2009. SUBDUCTION INFLUENCE ON OXYGEN FUGACITY AND TRACE AND VOLATILE ELEMENTS IN BASALTS ACROSS THE CASCADE VOLCANIC ARC. JOURNAL OF PETROLOGY, 50(1), PP.61-91.	CC02-1	CASCADIA	44.059	-121.713	OLIVINE	87.4337	887	50.131	1.0375	18.2471	7.7103	9.922	8.2365	0.5912	3.1389	0.2311	65.7867
RASMUSSEN ET AL. (2022)	ROWE, M.C., KENT, A.J. AND NIELSEN, R.L., 2009. SUBDUCTION INFLUENCE ON OXYGEN FUGACITY AND TRACE AND VOLATILE ELEMENTS IN BASALTS ACROSS THE CASCADE VOLCANIC ARC. JOURNAL OF PETROLOGY, 50(1), PP.61-91.	CC02-1	CASCADIA	44.059	-121.713	OLIVINE	87.0883	894	51.6717	1.1393	17.1438	8.4843	9.5682	8.9347	0.6559	3.1987	0.2336	65.4643
RASMUSSEN ET AL. (2022)	ROWE, M.C., KENT, A.J. AND NIELSEN, R.L., 2009. SUBDUCTION INFLUENCE ON OXYGEN FUGACITY AND TRACE AND VOLATILE ELEMENTS IN BASALTS ACROSS THE CASCADE VOLCANIC ARC. JOURNAL OF PETROLOGY, 50(1), PP.61-91.	HL03-1	CASCADIA	44.782	-121.777	OLIVINE	85.1449	896	47.0432	1.9657	16.2751	7.8116	12.0583	7.98	0.7764	4.0106	0.4098	64.7739
RASMUSSEN ET AL. (2022)	ROWE, M.C., KENT, A.J. AND NIELSEN, R.L., 2009. SUBDUCTION INFLUENCE ON OXYGEN FUGACITY AND TRACE AND VOLATILE ELEMENTS IN BASALTS ACROSS THE CASCADE VOLCANIC ARC. JOURNAL OF PETROLOGY, 50(1), PP.61-91.	HL03-1	CASCADIA	44.782	-121.777	OLIVINE	86.5724	899	49.7899	1.6772	14.3199	8.7132	12.1634	7.8613	0.7552	3.8903	0.4036	61.8904
RASMUSSEN ET AL. (2022)	ROWE, M.C., KENT, A.J. AND NIELSEN, R.L., 2009. SUBDUCTION INFLUENCE ON OXYGEN FUGACITY AND TRACE AND VOLATILE ELEMENTS IN BASALTS ACROSS THE CASCADE VOLCANIC ARC. JOURNAL OF PETROLOGY, 50(1), PP.61-91.	CC02-1	CASCADIA	44.059	-121.713	OLIVINE	88.0083	906	49.4538	1.11	18.2326	8.5819	9.973	8.3156	0.5928	3.2639	0.2065	63.5588
RASMUSSEN ET AL. (2022)	ROWE, M.C., KENT, A.J. AND NIELSEN, R.L., 2009. SUBDUCTION INFLUENCE ON OXYGEN FUGACITY AND TRACE AND VOLATILE ELEMENTS IN BASALTS ACROSS THE CASCADE VOLCANIC ARC. JOURNAL OF PETROLOGY, 50(1), PP.61-91.	CC02-1	CASCADIA	44.059	-121.713	OLIVINE	86.1997	912	50.9702	1.0691	17.9458	8.1101	9.5726	8.4581	0.6916	3.36	0.21	65.2444
RASMUSSEN ET AL. (2022)	ROWE, M.C., KENT, A.J. AND NIELSEN, R.L., 2009. SUBDUCTION INFLUENCE ON OXYGEN FUGACITY AND TRACE AND VOLATILE ELEMENTS IN BASALTS ACROSS THE CASCADE VOLCANIC ARC. JOURNAL OF PETROLOGY, 50(1), PP.61-91.	CC02-1	CASCADIA	44.059	-121.713	OLIVINE	85.5074	929	49.8815	0.994	16.8206	9.7278	9.4528	8.9958	0.6068	3.2	0.2081	62.4703
RASMUSSEN ET AL. (2022)	ROWE, M.C., KENT, A.J. AND NIELSEN, R.L., 2009. SUBDUCTION INFLUENCE ON OXYGEN FUGACITY AND TRACE AND VOLATILE ELEMENTS IN BASALTS ACROSS THE CASCADE VOLCANIC ARC. JOURNAL OF PETROLOGY, 50(1), PP.61-91.	CC02-1	CASCADIA	44.059	-121.713	OLIVINE	87.867	938	49.3142	0.9778	17.4502	7.3386	9.5716	8.2791	0.5807	3.3476	0.2172	67.0042
RASMUSSEN ET AL. (2022)	ROWE, M.C., KENT, A.J. AND NIELSEN, R.L., 2009. SUBDUCTION INFLUENCE ON OXYGEN FUGACITY AND TRACE AND VOLATILE ELEMENTS IN BASALTS ACROSS THE CASCADE VOLCANIC ARC. JOURNAL OF PETROLOGY, 50(1), PP.61-91.	CC02-1	CASCADIA	44.059	-121.713	OLIVINE	86.7449	949	50.8668	1.0448	17.4255	7.9372	9.3826	8.7355	0.664	3.2133	0.2098	66.4546
RASMUSSEN ET AL. (2022)	ROWE, M.C., KENT, A.J. AND NIELSEN, R.L., 2009. SUBDUCTION INFLUENCE ON OXYGEN FUGACITY AND TRACE AND VOLATILE ELEMENTS IN BASALTS ACROSS THE CASCADE VOLCANIC ARC. JOURNAL OF PETROLOGY, 50(1), PP.61-91.	FLR03-1	CASCADIA	44.172	-122.106	OLIVINE	85.3448	954	46.9977	1.9051	17.7276	10.0034	11.7686	8.8899	0.2916	1.4218	0.3203	61.5331
RASMUSSEN ET AL. (2022)	ROWE, M.C., KENT, A.J. AND NIELSEN, R.L., 2009. SUBDUCTION INFLUENCE ON OXYGEN FUGACITY AND TRACE AND VOLATILE ELEMENTS IN BASALTS ACROSS THE CASCADE VOLCANIC ARC. JOURNAL OF PETROLOGY, 50(1), PP.61-91.	BC02-1	CASCADIA	44.014	-121.699	OLIVINE	86.4557	960	49.6205	1.2964	18.2505	10.1815	9.7427	8.8738	0.4546	3.4262	0.2327	61.0715
RASMUSSEN ET AL. (2022)	ROWE, M.C., KENT, A.J. AND NIELSEN, R.L., 2009. SUBDUCTION INFLUENCE ON OXYGEN FUGACITY AND TRACE AND VOLATILE ELEMENTS IN BASALTS ACROSS THE CASCADE VOLCANIC ARC. JOURNAL OF PETROLOGY, 50(1), PP.61-91.	CC02-1	CASCADIA	44.059	-121.713	OLIVINE	87.0611	965	50.9395	1.0449	18.1671	7.6477	10.4004	8.2738	0.6318	3.2729	0.2109	66.0714
RASMUSSEN ET AL. (2022)	ROWE, M.C., KENT, A.J. AND NIELSEN, R.L., 2009. SUBDUCTION INFLUENCE ON OXYGEN FUGACITY AND TRACE AND VOLATILE ELEMENTS IN BASALTS ACROSS THE CASCADE VOLCANIC ARC. JOURNAL OF PETROLOGY, 50(1), PP.61-91.	CC02-1	CASCADIA	44.059	-121.713	OLIVINE	88.0679	966	50.4818	1.1134	18.0476	7.5667	10.5558	7.9993	0.6157	3.1706	0.2031	65.5518
RASMUSSEN ET AL. (2022)	ROWE, M.C., KENT, A.J. AND NIELSEN, R.L., 2009. SUBDUCTION INFLUENCE ON OXYGEN FUGACITY AND TRACE AND VOLATILE ELEMENTS IN BASALTS ACROSS THE CASCADE VOLCANIC ARC. JOURNAL OF PETROLOGY, 50(1), PP.61-91.	FLR03-1	CASCADIA	44.172	-122.106	OLIVINE	85.2209	967	50.1726	1.6115	17.0743	9.419	10.7502	8.5525	0.5021	3.4449	0.4322	62.0408
RASMUSSEN ET AL. (2022)	ROWE, M.C., KENT, A.J. AND NIELSEN, R.L., 2009. SUBDUCTION INFLUENCE ON OXYGEN FUGACITY AND TRACE AND VOLATILE ELEMENTS IN BASALTS ACROSS THE CASCADE VOLCANIC ARC. JOURNAL OF PETROLOGY, 50(1), PP.61-91.	CC02-1	CASCADIA	44.059	-121.713	OLIVINE	87.3099	969	49.7962	1.1105	17.5406	8.7353	10.3483	8.8847	0.6203	3.1918	0.2181	64.6741
RASMUSSEN ET AL. (2022)	ROWE, M.C., KENT, A.J. AND NIELSEN, R.L., 2009. SUBDUCTION INFLUENCE ON OXYGEN FUGACITY AND TRACE AND VOLATILE ELEMENTS IN BASALTS ACROSS THE CASCADE VOLCANIC ARC. JOURNAL OF PETROLOGY, 50(1), PP.61-91.	CC02-1	CASCADIA	44.059	-121.713	OLIVINE	87.4457	969	50.9859	1.0439	18.1768	7.7957	10.1163	8.5176	0.593	3.1938	0.2059	66.2923
RASMUSSEN ET AL. (2022)	ROWE, M.C., KENT, A.J. AND NIELSEN, R.L., 2009. SUBDUCTION INFLUENCE ON OXYGEN FUGACITY AND TRACE AND VOLATILE ELEMENTS IN BASALTS ACROSS THE CASCADE VOLCANIC ARC. JOURNAL OF PETROLOGY, 50(1), PP.61-91.	CC02-1	CASCADIA	44.059	-121.713	OLIVINE	87.249	972	51.3793	1.0547	18.1487	8.1505	10.0073	8.696	0.5999	3.259	0.2159	65.7589
RASMUSSEN ET AL. (2022)	ROWE, M.C., KENT, A.J. AND NIELSEN, R.L., 2009. SUBDUCTION INFLUENCE ON OXYGEN FUGACITY AND TRACE AND VOLATILE ELEMENTS IN BASALTS ACROSS THE CASCADE VOLCANIC ARC. JOURNAL OF PETROLOGY, 50(1), PP.61-91.	CC02-1	CASCADIA	44.059	-121.713	OLIVINE	87.0435	974	50.4735	1.0842	17.7254	9.28	9.6434	8.5341	0.6708	3.2871	0.2377	62.3398
RASMUSSEN ET AL. (2022)	ROWE, M.C., KENT, A.J. AND NIELSEN, R.L., 2009. SUBDUCTION INFLUENCE ON OXYGEN FUGACITY AND TRACE AND VOLATILE ELEMENTS IN BASALTS ACROSS THE CASCADE VOLCANIC ARC. JOURNAL OF PETROLOGY, 50(1), PP.61-91.	CC02-1	CASCADIA	44.059	-121.713	OLIVINE	88.1317	980	50.6246	1.0554	17.9707	7.4768	10.4301	8.2807	0.5891	3.1172	0.1909	66.5947
RASMUSSEN ET AL. (2022)	ROWE, M.C., KENT, A.J. AND NIELSEN, R.L., 2009. SUBDUCTION INFLUENCE ON OXYGEN FUGACITY AND TRACE AND VOLATILE ELEMENTS IN BASALTS ACROSS THE CASCADE VOLCANIC ARC. JOURNAL OF PETROLOGY, 50(1), PP.61-91.	CC02-1	CASCADIA	44.059	-121.713	OLIVINE	88.1317	980	50.6246	1.0554	17.9707	7.4768	10.4301	8.2807	0.5891	3.1172	0.1909	66.5947
RASMUSSEN ET AL. (2022)	ROWE, M.C., KENT, A.J. AND NIELSEN, R.L., 2009. SUBDUCTION INFLUENCE ON OXYGEN FUGACITY AND TRACE AND VOLATILE ELEMENTS IN BASALTS ACROSS THE CASCADE VOLCANIC ARC. JOURNAL OF PETROLOGY, 50(1), PP.61-91.	CC02-1	CASCADIA	44.059	-121.713	OLIVINE	85.4246	986	51.1868	1.0637	17.4613	9.0135	9.6546	8.5436	0.6154	3.325	0.2134	63.0473
RASMUSSEN ET AL. (2022)	ROWE, M.C., KENT, A.J. AND NIELSEN, R.L., 2009. SUBDUCTION INFLUENCE ON OXYGEN FUGACITY AND TRACE AND VOLATILE ELEMENTS IN BASALTS ACROSS THE CASCADE VOLCANIC ARC. JOURNAL OF PETROLOGY, 50(1), PP.61-91.	CC02-1	CASCADIA	44.059	-121.713	OLIVINE	87.6242	996	50.6136	1.0529	18.0299	7.6268	10.8512	8.5952	0.5617	3.3338	0.1736	66.9809
RASMUSSEN ET AL. (2022)	ROWE, M.C., KENT, A.J. AND NIELSEN, R.L., 2009. SUBDUCTION INFLUENCE ON OXYGEN FUGACITY AND TRACE AND VOLATILE ELEMENTS IN BASALTS ACROSS THE CASCADE VOLCANIC ARC. JOURNAL OF PETROLOGY, 50(1), PP.61-91.	CC02-1	CASCADIA	44.059	-121.713	OLIVINE	86.667	1009	49.9368	1.0759	17.7756	9.144	9.9109	8.5403	0.5922	3.069	0.2016	62.7027
RASMUSSEN ET AL. (2022)	ROWE, M.C., KENT, A.J. AND NIELSEN, R.L., 2009. SUBDUCTION INFLUENCE ON OXYGEN FUGACITY AND TRACE AND VOLATILE ELEMENTS IN BASALTS ACROSS THE CASCADE VOLCANIC ARC. JOURNAL OF PETROLOGY, 50(1), PP.61-91.	CC02-1	CASCADIA	44.059	-121.713	OLIVINE	87.5739	1010	49.9151	1.051	17.2496	8.0095	9.5751	8.9933	0.5811	3.3506	0.1476	66.8994
RASMUSSEN ET AL. (2022)	ROWE, M.C., KENT, A.J. AND NIELSEN, R.L., 2009. SUBDUCTION INFLUENCE ON OXYGEN FUGACITY AND TRACE AND VOLATILE ELEMENTS IN BASALTS ACROSS THE CASCADE VOLCANIC ARC. JOURNAL OF PETROLOGY, 50(1), PP.61-91.	CC02-1	CASCADIA	44.059	-121.713	OLIVINE	87.5697	1032	50.6484	0.9998	16.7973	7.4584	9.2757	9.2114	0.5902	3.1903	0.1727	68.9736
RASMUSSEN ET AL. (2022)	ROWE, M.C., KENT, A.J. AND NIELSEN, R.L., 2009. SUBDUCTION INFLUENCE ON OXYGEN FUGACITY AND TRACE AND VOLATILE ELEMENTS IN BASALTS ACROSS THE CASCADE VOLCANIC ARC. JOURNAL OF PETROLOGY, 50(1), PP.61-91.	CC02-1	CASCADIA	44.059	-121.713	OLIVINE	87.5259	1033	50.3479	1.0195	17.747	8.4377	9.9231	8.6297	0.5828	3.1384	0.1859	64.8006
RASMUSSEN ET AL. (2022)	ROWE, M.C., KENT, A.J. AND NIELSEN, R.L., 2009. SUBDUCTION INFLUENCE ON OXYGEN FUGACITY AND TRACE AND VOLATILE ELEMENTS IN BASALTS ACROSS THE CASCADE VOLCANIC ARC. JOURNAL OF PETROLOGY, 50(1), PP.61-91.	CC02-1	CASCADIA	44.059	-121.713	OLIVINE	86.8492	1033	50.4213	1.0515	17.9059	8.6772	9.8546	8.4225	0.603	3.3014	0.1665	63.5988
RASMUSSEN ET AL. (2022)	ROWE, M.C., KENT, A.J. AND NIELSEN, R.L., 2009. SUBDUCTION INFLUENCE ON OXYGEN FUGACITY AND TRACE AND VOLATILE ELEMENTS IN BASALTS ACROSS THE CASCADE VOLCANIC ARC. JOURNAL OF PETROLOGY, 50(1), PP.61-91.	CC02-1	CASCADIA	44.059	-121.713	OLIVINE	87.184	1042	50.5368	1.109	17.965	8.5853	9.6392	8.2842	0.681	3.4894	0.2122	63.4619
RASMUSSEN ET AL. (2022)	ROWE, M.C., KENT, A.J. AND NIELSEN, R.L., 2009. SUBDUCTION INFLUENCE ON OXYGEN FUGACITY AND TRACE AND VOLATILE ELEMENTS IN BASALTS ACROSS THE CASCADE VOLCANIC ARC. JOURNAL OF PETROLOGY, 50(1), PP.61-91.	CC02-1	CASCADIA	44.059	-121.713	OLIVINE	88.1128	1043	51.0591	1.0261	17.3407	7.2937	10.1007	9.4108	0.5904	3.157	0.1716	69.902
RASMUSSEN ET AL. (2022)	ROWE, M.C., KENT, A.J. AND NIELSEN, R.L., 2009. SUBDUCTION INFLUENCE ON OXYGEN FUGACITY AND TRACE AND VOLATILE ELEMENTS IN BASALTS ACROSS THE CASCADE VOLCANIC ARC. JOURNAL OF PETROLOGY, 50(1), PP.61-91.	CC02-1	CASCADIA	44.059	-121.713	OLIVINE	86.8914	1047	49.9871	1.0101	17.5808	9.0786	9.8027	8.5247	0.5554	3.1982	0.2042	62.8278
RASMUSSEN ET AL. (2022)	ROWE, M.C., KENT, A.J. AND NIELSEN, R.L., 2009. SUBDUCTION INFLUENCE ON OXYGEN FUGACITY AND TRACE AND VOLATILE ELEMENTS IN BASALTS ACROSS THE CASCADE VOLCANIC ARC. JOURNAL OF PETROLOGY, 50(1), PP.61-91.	CC02-1	CASCADIA	44.059	-121.713	OLIVINE	87.7785	1050	51.4804	1.1016	18.3265	7.8359	10.0384	8.6918	0.5926	3.4646	0.225	66.629
RASMUSSEN ET AL. (2022)	ROWE, M.C., KENT, A.J. AND NIELSEN, R.L., 2009. SUBDUCTION INFLUENCE ON OXYGEN FUGACITY AND TRACE AND VOLATILE ELEMENTS IN BASALTS ACROSS THE CASCADE VOLCANIC ARC. JOURNAL OF PETROLOGY, 50(1), PP.61-91.	CC02-1	CASCADIA	44.059	-121.713	OLIVINE	88.1984	1059	49.5693	1.0894	17.5807	8.0151	10.4832	8.8095	0.5644	3.1937	0.2002	66.425
RASMUSSEN ET AL. (2022)	ROWE, M.C., KENT, A.J. AND NIELSEN, R.L., 2009. SUBDUCTION INFLUENCE ON OXYGEN FUGACITY AND TRACE AND VOLATILE ELEMENTS IN BASALTS ACROSS THE CASCADE VOLCANIC ARC. JOURNAL OF PETROLOGY, 50(1), PP.61-91.	CC02-1	CASCADIA	44.059	-121.713	OLIVINE	87.1278	1100	51.1438	1.0631	17.7581	8.0448	10.0596	8.895	0.5967	3.2706	0.1924	66.5578
RASMUSSEN ET AL. (2022)	ROWE, M.C., KENT, A.J. AND NIELSEN, R.L., 2009. SUBDUCTION INFLUENCE ON OXYGEN FUGACITY AND TRACE AND VOLATILE ELEMENTS IN BASALTS ACROSS THE CASCADE VOLCANIC ARC. JOURNAL OF PETROLOGY, 50(1), PP.61-91.	CC02-1	CASCADIA	44.059	-121.713	OLIVINE	86.8014	1106	51.0442	1.0337	17.6733	8.3653	9.0488	8.5613	0.6997	3.4376	0.2119	64.8157
RASMUSSEN ET AL. (2022)	ROWE, M.C., KENT, A.J. AND NIELSEN, R.L., 2009. SUBDUCTION INFLUENCE ON OXYGEN FUGACITY AND TRACE AND VOLATILE ELEMENTS IN BASALTS ACROSS THE CASCADE VOLCANIC ARC. JOURNAL OF PETROLOGY, 50(1), PP.61-91.	CC02-1	CASCADIA	44.059	-121.713	OLIVINE	87.3636	1114	50.4061	1.0063	17.6303	7.7008	9.8038	8.6593	0.5932	3.1368	0.2523	66.9317
RASMUSSEN ET AL. (2022)	ROWE, M.C., KENT, A.J. AND NIELSEN, R.L., 2009. SUBDUCTION INFLUENCE ON OXYGEN FUGACITY AND TRACE AND VOLATILE ELEMENTS IN BASALTS ACROSS THE CASCADE VOLCANIC ARC. JOURNAL OF PETROLOGY, 50(1), PP.61-91.	CC02-1	CASCADIA	44.059	-121.713	OLIVINE	86.1225	1121	49.6592	0.9817	17.6954	8.5113	9.6484	8.031	0.6496	3.196	0.2189	62.9413
RASMUSSEN ET AL. (2022)	ROWE, M.C., KENT, A.J. AND NIELSEN, R.L., 2009. SUBDUCTION INFLUENCE ON OXYGEN FUGACITY AND TRACE AND VOLATILE ELEMENTS IN BASALTS ACROSS THE CASCADE VOLCANIC ARC. JOURNAL OF PETROLOGY, 50(1), PP.61-91.	CC02-1	CASCADIA	44.059	-121.713	OLIVINE	88.0861	1131	50.5296	1.0809	17.4743	7.9483	10.1983	8.9244	0.5719	3.3254	0.1948	66.8989
RASMUSSEN ET AL. (2022)	ROWE, M.C., KENT, A.J. AND NIELSEN, R.L., 2009. SUBDUCTION INFLUENCE ON OXYGEN FUGACITY AND TRACE AND VOLATILE ELEMENTS IN BASALTS ACROSS THE CASCADE VOLCANIC ARC. JOURNAL OF PETROLOGY, 50(1), PP.61-91.	FLR03-1	CASCADIA	44.172	-122.106	OLIVINE	85.344	1139	44.905	1.7586	16.4367	12.1956	10.6973	11.7506	0.3161	1.8055	0.246	63.4278
RASMUSSEN ET AL. (2022)	ROWE, M.C., KENT, A.J. AND NIELSEN, R.L., 2009. SUBDUCTION INFLUENCE ON OXYGEN FUGACITY AND TRACE AND VOLATILE ELEMENTS IN BASALTS ACROSS THE CASCADE VOLCANIC ARC. JOURNAL OF PETROLOGY, 50(1), PP.61-91.	BC02-1	CASCADIA	44.014	-121.699	OLIVINE	85.3826	1154	48.6662	1.363	17.6858	10.5219	9.708	8.8375	0.536	3.3237	0.2494	60.1887
RASMUSSEN ET AL. (2022)	ROWE, M.C., KENT, A.J. AND NIELSEN, R.L., 2009. SUBDUCTION INFLUENCE ON OXYGEN FUGACITY AND TRACE AND VOLATILE ELEMENTS IN BASALTS ACROSS THE CASCADE VOLCANIC ARC. JOURNAL OF PETROLOGY, 50(1), PP.61-91.	CC02-1	CASCADIA	44.059	-121.713	OLIVINE	86.9729	1160	51.3052	1.0699	18.2757	8.1208	9.7657	8.3639	0.6828	3.0949	0.2347	64.96
RASMUSSEN ET AL. (2022)	ROWE, M.C., KENT, A.J. AND NIELSEN, R.L., 2009. SUBDUCTION INFLUENCE ON OXYGEN FUGACITY AND TRACE AND VOLATILE ELEMENTS IN BASALTS ACROSS THE CASCADE VOLCANIC ARC. JOURNAL OF PETROLOGY, 50(1), PP.61-91.	FLR03-1	CASCADIA	44.172	-122.106	OLIVINE	85.0794	1177	48.3308	1.6891	16.6594	11.4655	9.5657	10.0626	0.5008	3.1272	0.3103	61.2366
RASMUSSEN ET AL. (2022)	ROWE, M.C., KENT, A.J. AND NIELSEN, R.L., 2009. SUBDUCTION INFLUENCE ON OXYGEN FUGACITY AND TRACE AND VOLATILE ELEMENTS IN BASALTS ACROSS THE CASCADE VOLCANIC ARC. JOURNAL OF PETROLOGY, 50(1), PP.61-91.	FLR03-1	CASCADIA	44.172	-122.106	OLIVINE	85.5276	1228	43.2144	2.4286	17.365	11.4048	13.7455	9.5653	0.0871	0.5929	0.219	60.1542
RASMUSSEN ET AL. (2022)	SADOFSKY, S.J., PORTNYAGIN, M., HOERNLE, K. AND VAN DEN BOGAARD, P., 2008. SUBDUCTION CYCLING OF VOLATILES AND TRACE ELEMENTS THROUGH THE CENTRAL AMERICAN VOLCANIC ARC: EVIDENCE FROM MELT INCLUSIONS. CONTRIBUTIONS TO MINERALOGY AND PETROLOGY, 155(4), PP.433-456. AND WEHRMANN, H., HOERNLE, K., PORTNYAGIN, M., WIEDENBECK, M. AND HEYDOLPH, K., 2011. VOLCANIC CO2 OUTPUT AT THE CENTRAL AMERICAN SUBDUC…	P2-58	CENTAM	11.92	-85.98	OLIVINE	87.2637	1301	45.5702	1.07637	16.252	7.88706	14.9775	6.90875	0.136567	1.97585	0.167362	61.1911
RASMUSSEN ET AL. (2022)	SADOFSKY, S.J., PORTNYAGIN, M., HOERNLE, K. AND VAN DEN BOGAARD, P., 2008. SUBDUCTION CYCLING OF VOLATILES AND TRACE ELEMENTS THROUGH THE CENTRAL AMERICAN VOLCANIC ARC: EVIDENCE FROM MELT INCLUSIONS. CONTRIBUTIONS TO MINERALOGY AND PETROLOGY, 155(4), PP.433-456. AND WEHRMANN, H., HOERNLE, K., PORTNYAGIN, M., WIEDENBECK, M. AND HEYDOLPH, K., 2011. VOLCANIC CO2 OUTPUT AT THE CENTRAL AMERICAN SUBDUC…	P2-58	CENTAM	11.92	-85.98	OLIVINE	86.1294	1346	48.0128	1.06151	16.0348	8.4867	13.3455	7.61485	0.133554	2.12436	0.180718	61.7603
RASMUSSEN ET AL. (2022)	SADOFSKY, S.J., PORTNYAGIN, M., HOERNLE, K. AND VAN DEN BOGAARD, P., 2008. SUBDUCTION CYCLING OF VOLATILES AND TRACE ELEMENTS THROUGH THE CENTRAL AMERICAN VOLCANIC ARC: EVIDENCE FROM MELT INCLUSIONS. CONTRIBUTIONS TO MINERALOGY AND PETROLOGY, 155(4), PP.433-456. AND WEHRMANN, H., HOERNLE, K., PORTNYAGIN, M., WIEDENBECK, M. AND HEYDOLPH, K., 2011. VOLCANIC CO2 OUTPUT AT THE CENTRAL AMERICAN SUBDUC…	P2-72	CENTAM	9.979	-83.852	OLIVINE	88.9878	2009	50.0227	0.846828	17.1662	6.81969	11.1353	5.67171	0.827674	2.66412	0.285882	59.9519
RASMUSSEN ET AL. (2022)	WEHRMANN, H., HOERNLE, K., JACQUES, G., GARBE-SCHÖNBERG, D., SCHUMANN, K., MAHLKE, J. AND LARA, L.E., 2014. VOLATILE (SULPHUR AND CHLORINE), MAJOR, AND TRACE ELEMENT GEOCHEMISTRY OF MAFIC TO INTERMEDIATE TEPHRAS FROM THE CHILEAN SOUTHERN VOLCANIC ZONE (33–43 S). INTERNATIONAL JOURNAL OF EARTH SCIENCES, 103(7), PP.1945-1962.	CL189	CHILE	-35.719	-70.785	OLIVINE	91.38	1618	52.01	0.76	16.71	7.67	12	7.17	0.66	2.73	0.11	62.7236
RASMUSSEN ET AL. (2022)	WEHRMANN, H., HOERNLE, K., JACQUES, G., GARBE-SCHÖNBERG, D., SCHUMANN, K., MAHLKE, J. AND LARA, L.E., 2014. VOLATILE (SULPHUR AND CHLORINE), MAJOR, AND TRACE ELEMENT GEOCHEMISTRY OF MAFIC TO INTERMEDIATE TEPHRAS FROM THE CHILEAN SOUTHERN VOLCANIC ZONE (33–43 S). INTERNATIONAL JOURNAL OF EARTH SCIENCES, 103(7), PP.1945-1962.	CL189	CHILE	-35.719	-70.785	OLIVINE	89.22	2030	51.07	0.79	18.16	7.18	12.58	6.46	0.73	2.81	0.11	61.8248
RASMUSSEN ET AL. (2022)	WEHRMANN, H., HOERNLE, K., JACQUES, G., GARBE-SCHÖNBERG, D., SCHUMANN, K., MAHLKE, J. AND LARA, L.E., 2014. VOLATILE (SULPHUR AND CHLORINE), MAJOR, AND TRACE ELEMENT GEOCHEMISTRY OF MAFIC TO INTERMEDIATE TEPHRAS FROM THE CHILEAN SOUTHERN VOLCANIC ZONE (33–43 S). INTERNATIONAL JOURNAL OF EARTH SCIENCES, 103(7), PP.1945-1962.	CL196	CHILE	-35.719	-70.785	OLIVINE	90.68	2204	52.78	0.78	18.04	6.74	11.87	5.85	0.79	2.9	0.14	60.9728
RASMUSSEN ET AL. (2022)	WEHRMANN, H., HOERNLE, K., JACQUES, G., GARBE-SCHÖNBERG, D., SCHUMANN, K., MAHLKE, J. AND LARA, L.E., 2014. VOLATILE (SULPHUR AND CHLORINE), MAJOR, AND TRACE ELEMENT GEOCHEMISTRY OF MAFIC TO INTERMEDIATE TEPHRAS FROM THE CHILEAN SOUTHERN VOLCANIC ZONE (33–43 S). INTERNATIONAL JOURNAL OF EARTH SCIENCES, 103(7), PP.1945-1962.	CL196	CHILE	-35.719	-70.785	OLIVINE	90.18	2223	52.38	0.79	17.37	7.09	11.69	6.83	0.75	2.84	0.12	63.4234
RASMUSSEN ET AL. (2022)	WEHRMANN, H., HOERNLE, K., JACQUES, G., GARBE-SCHÖNBERG, D., SCHUMANN, K., MAHLKE, J. AND LARA, L.E., 2014. VOLATILE (SULPHUR AND CHLORINE), MAJOR, AND TRACE ELEMENT GEOCHEMISTRY OF MAFIC TO INTERMEDIATE TEPHRAS FROM THE CHILEAN SOUTHERN VOLCANIC ZONE (33–43 S). INTERNATIONAL JOURNAL OF EARTH SCIENCES, 103(7), PP.1945-1962.	CL196	CHILE	-35.719	-70.785	OLIVINE	90.8	2326	49.62	0.81	17.82	7.64	13.38	6.78	0.69	2.95	0.16	61.4997
RASMUSSEN ET AL. (2022)	WEHRMANN, H., HOERNLE, K., JACQUES, G., GARBE-SCHÖNBERG, D., SCHUMANN, K., MAHLKE, J. AND LARA, L.E., 2014. VOLATILE (SULPHUR AND CHLORINE), MAJOR, AND TRACE ELEMENT GEOCHEMISTRY OF MAFIC TO INTERMEDIATE TEPHRAS FROM THE CHILEAN SOUTHERN VOLCANIC ZONE (33–43 S). INTERNATIONAL JOURNAL OF EARTH SCIENCES, 103(7), PP.1945-1962.	CL196	CHILE	-35.719	-70.785	OLIVINE	90.8	2396	50.04	0.83	18.31	7.18	13.7	5.87	0.72	3.07	0.13	59.5402
RASMUSSEN ET AL. (2022)	WEHRMANN, H., HOERNLE, K., JACQUES, G., GARBE-SCHÖNBERG, D., SCHUMANN, K., MAHLKE, J. AND LARA, L.E., 2014. VOLATILE (SULPHUR AND CHLORINE), MAJOR, AND TRACE ELEMENT GEOCHEMISTRY OF MAFIC TO INTERMEDIATE TEPHRAS FROM THE CHILEAN SOUTHERN VOLCANIC ZONE (33–43 S). INTERNATIONAL JOURNAL OF EARTH SCIENCES, 103(7), PP.1945-1962.	CL189	CHILE	-35.719	-70.785	OLIVINE	89.66	2548	51.73	0.83	17.8	6.84	12.83	5.87	0.71	3.12	0.13	60.7032
RASMUSSEN ET AL. (2022)	HAURI, PLANK, FISCHER, TAMURA AND ISHIZUKA, 2021. MELT INCLUSION DATA FROM THE MARIANAS AND IZU VOLCANIC ARCS, AND MARIANA TROUGH BACK-ARC BASIN. EARTHCHEM LIBRARY.	MARA-34-1	IBM	15.877	144.728	OLIVINE	88.2246	10.7645	50.281	1.3	15.213	7.453	9.383	10.893	0.372	3.071	0.156	72.4579
RASMUSSEN ET AL. (2022)	HAURI, PLANK, FISCHER, TAMURA AND ISHIZUKA, 2021. MELT INCLUSION DATA FROM THE MARIANAS AND IZU VOLCANIC ARCS, AND MARIANA TROUGH BACK-ARC BASIN. EARTHCHEM LIBRARY.	673-R22 Izx	IBM	28.5763	140.539	OLIVINE	85.6899	217.592	51.0394	1.2183	16.5312	7.6557	9.7469	6.8895	0.7695	3.62	0.2999	61.8299
RASMUSSEN ET AL. (2022)	HAURI, PLANK, FISCHER, TAMURA AND ISHIZUKA, 2021. MELT INCLUSION DATA FROM THE MARIANAS AND IZU VOLCANIC ARCS, AND MARIANA TROUGH BACK-ARC BASIN. EARTHCHEM LIBRARY.	ALV-1846-9	IBM	18.33	144.67	OLIVINE	88.9186	260.348	50.201	0.544	17.519	7.115	13.39	6.886	0.812	2.193	0.12	63.5311
RASMUSSEN ET AL. (2022)	HAURI, PLANK, FISCHER, TAMURA AND ISHIZUKA, 2021. MELT INCLUSION DATA FROM THE MARIANAS AND IZU VOLCANIC ARCS, AND MARIANA TROUGH BACK-ARC BASIN. EARTHCHEM LIBRARY.	ALV-1846-9	IBM	18.33	144.67	OLIVINE	88.9298	402.304	49.921	0.532	17.362	6.855	13.546	7.108	0.774	2.175	0.104	65.1134
RASMUSSEN ET AL. (2022)	HAURI, PLANK, FISCHER, TAMURA AND ISHIZUKA, 2021. MELT INCLUSION DATA FROM THE MARIANAS AND IZU VOLCANIC ARCS, AND MARIANA TROUGH BACK-ARC BASIN. EARTHCHEM LIBRARY.	673-R28 Izx	IBM	28.5773	140.542	OLIVINE	88.4681	429.677	49.5832	1.061	19.5161	5.9309	10.9361	5.1793	0.7075	3.746	0.3084	61.1181
RASMUSSEN ET AL. (2022)	HAURI, PLANK, FISCHER, TAMURA AND ISHIZUKA, 2021. MELT INCLUSION DATA FROM THE MARIANAS AND IZU VOLCANIC ARCS, AND MARIANA TROUGH BACK-ARC BASIN. EARTHCHEM LIBRARY.	MARA-34-1	IBM	15.877	144.728	OLIVINE	88.5662	443.109	50.845	0.837	17.146	7.139	11.957	6.44	0.33	2.54	0.118	61.8867
RASMUSSEN ET AL. (2022)	HAURI, PLANK, FISCHER, TAMURA AND ISHIZUKA, 2021. MELT INCLUSION DATA FROM THE MARIANAS AND IZU VOLCANIC ARCS, AND MARIANA TROUGH BACK-ARC BASIN. EARTHCHEM LIBRARY.	MARA-34-1	IBM	15.877	144.728	OLIVINE	87.6718	469.546	50.881	0.863	17.227	7.25	12.053	6.275	0.323	2.517	0.101	60.9059
RASMUSSEN ET AL. (2022)	HAURI, PLANK, FISCHER, TAMURA AND ISHIZUKA, 2021. MELT INCLUSION DATA FROM THE MARIANAS AND IZU VOLCANIC ARCS, AND MARIANA TROUGH BACK-ARC BASIN. EARTHCHEM LIBRARY.	MARA-34-1	IBM	15.877	144.728	OLIVINE	87.7694	493.684	50.358	0.806	16.988	7.115	11.952	6.509	0.316	2.456	0.113	62.217
RASMUSSEN ET AL. (2022)	HAURI, PLANK, FISCHER, TAMURA AND ISHIZUKA, 2021. MELT INCLUSION DATA FROM THE MARIANAS AND IZU VOLCANIC ARCS, AND MARIANA TROUGH BACK-ARC BASIN. EARTHCHEM LIBRARY.	04-ALA-03	IBM	17.5866	145.838	OLIVINE	85.6901	584.77	52.717	0.814	17.043	6.591	10.624	5.581	1.148	2.104	0.216	60.383
RASMUSSEN ET AL. (2022)	HAURI, PLANK, FISCHER, TAMURA AND ISHIZUKA, 2021. MELT INCLUSION DATA FROM THE MARIANAS AND IZU VOLCANIC ARCS, AND MARIANA TROUGH BACK-ARC BASIN. EARTHCHEM LIBRARY.	MARA-38D	IBM	17.383	145.015	OLIVINE	89.9979	633.341	49.489	1.047	17.422	6.11	11.562	10.374	0.077	2.989	0.1	75.3462
RASMUSSEN ET AL. (2022)	HAURI, PLANK, FISCHER, TAMURA AND ISHIZUKA, 2021. MELT INCLUSION DATA FROM THE MARIANAS AND IZU VOLCANIC ARCS, AND MARIANA TROUGH BACK-ARC BASIN. EARTHCHEM LIBRARY.	ALV-1846-9	IBM	18.33	144.67	OLIVINE	89.1304	651.732	50.289	0.549	17.534	7.125	14.303	5.817	0.705	2.107	0.096	59.5069
RASMUSSEN ET AL. (2022)	HAURI, PLANK, FISCHER, TAMURA AND ISHIZUKA, 2021. MELT INCLUSION DATA FROM THE MARIANAS AND IZU VOLCANIC ARCS, AND MARIANA TROUGH BACK-ARC BASIN. EARTHCHEM LIBRARY.	MARA-38D	IBM	17.383	145.015	OLIVINE	89.9979	654.031	49.255	1.013	17.092	6.673	11.722	10.285	0.075	3.006	0.09	73.5051
RASMUSSEN ET AL. (2022)	HAURI, PLANK, FISCHER, TAMURA AND ISHIZUKA, 2021. MELT INCLUSION DATA FROM THE MARIANAS AND IZU VOLCANIC ARCS, AND MARIANA TROUGH BACK-ARC BASIN. EARTHCHEM LIBRARY.	MARA-34-1	IBM	15.877	144.728	OLIVINE	88.2246	706.906	49.611	1.392	15.094	8.554	9.437	10.676	0.616	2.629	0.305	69.1979
RASMUSSEN ET AL. (2022)	HAURI, PLANK, FISCHER, TAMURA AND ISHIZUKA, 2021. MELT INCLUSION DATA FROM THE MARIANAS AND IZU VOLCANIC ARCS, AND MARIANA TROUGH BACK-ARC BASIN. EARTHCHEM LIBRARY.	MARA-34-1	IBM	15.877	144.728	OLIVINE	87.6034	725.297	50.098	0.772	17.742	7.144	12.743	5.925	0.293	2.299	0.103	59.8855
RASMUSSEN ET AL. (2022)	HAURI, PLANK, FISCHER, TAMURA AND ISHIZUKA, 2021. MELT INCLUSION DATA FROM THE MARIANAS AND IZU VOLCANIC ARCS, AND MARIANA TROUGH BACK-ARC BASIN. EARTHCHEM LIBRARY.	MARA-34-1	IBM	15.877	144.728	OLIVINE	87.8635	737.94	50.107	0.799	17.499	7.028	12.036	6.655	0.335	2.515	0.09	63.0241
RASMUSSEN ET AL. (2022)	HAURI, PLANK, FISCHER, TAMURA AND ISHIZUKA, 2021. MELT INCLUSION DATA FROM THE MARIANAS AND IZU VOLCANIC ARCS, AND MARIANA TROUGH BACK-ARC BASIN. EARTHCHEM LIBRARY.	MARA-34-1	IBM	15.877	144.728	OLIVINE	87.3925	781.044	50.091	0.777	17.933	7.177	12.36	6.309	0.301	2.364	0.089	61.2749
RASMUSSEN ET AL. (2022)	HAURI, PLANK, FISCHER, TAMURA AND ISHIZUKA, 2021. MELT INCLUSION DATA FROM THE MARIANAS AND IZU VOLCANIC ARCS, AND MARIANA TROUGH BACK-ARC BASIN. EARTHCHEM LIBRARY.	MARA-38D	IBM	17.383	145.015	OLIVINE	86.6393	795.987	50.655	1.177	15.145	8.057	10.839	10.043	0.194	3.11	0.116	69.1709
RASMUSSEN ET AL. (2022)	HAURI, PLANK, FISCHER, TAMURA AND ISHIZUKA, 2021. MELT INCLUSION DATA FROM THE MARIANAS AND IZU VOLCANIC ARCS, AND MARIANA TROUGH BACK-ARC BASIN. EARTHCHEM LIBRARY.	MARA-9-1	IBM	17.945	144.805	OLIVINE	87.0397	798.861	48.114	1.369	13.949	8.921	13.666	10.53	0.296	2.049	0.13	67.9964
RASMUSSEN ET AL. (2022)	HAURI, PLANK, FISCHER, TAMURA AND ISHIZUKA, 2021. MELT INCLUSION DATA FROM THE MARIANAS AND IZU VOLCANIC ARCS, AND MARIANA TROUGH BACK-ARC BASIN. EARTHCHEM LIBRARY.	MARA-9-1	IBM	17.945	144.805	OLIVINE	87.0696	800.01	50.655	1.007	14.917	7.199	11.168	10.566	0.188	2.598	0.102	72.5416
RASMUSSEN ET AL. (2022)	HAURI, PLANK, FISCHER, TAMURA AND ISHIZUKA, 2021. MELT INCLUSION DATA FROM THE MARIANAS AND IZU VOLCANIC ARCS, AND MARIANA TROUGH BACK-ARC BASIN. EARTHCHEM LIBRARY.	D48-4-1	IBM	17.275	145.623	OLIVINE	90.6973	806.266	49.109	0.937	17.355	7.01	14.438	8.277	0.609	2.565	0.143	68.0034
RASMUSSEN ET AL. (2022)	HAURI, PLANK, FISCHER, TAMURA AND ISHIZUKA, 2021. MELT INCLUSION DATA FROM THE MARIANAS AND IZU VOLCANIC ARCS, AND MARIANA TROUGH BACK-ARC BASIN. EARTHCHEM LIBRARY.	MARA-38D	IBM	17.383	145.015	OLIVINE	86.9953	806.332	50.876	1.195	14.937	8.03	10.896	10.208	0.164	3.107	0.126	69.5884
RASMUSSEN ET AL. (2022)	HAURI, PLANK, FISCHER, TAMURA AND ISHIZUKA, 2021. MELT INCLUSION DATA FROM THE MARIANAS AND IZU VOLCANIC ARCS, AND MARIANA TROUGH BACK-ARC BASIN. EARTHCHEM LIBRARY.	MARA-9-1	IBM	17.945	144.805	OLIVINE	88.2196	809.78	49.27	1.238	14.936	7.888	10.188	10.981	0.447	2.752	0.396	71.4759
RASMUSSEN ET AL. (2022)	HAURI, PLANK, FISCHER, TAMURA AND ISHIZUKA, 2021. MELT INCLUSION DATA FROM THE MARIANAS AND IZU VOLCANIC ARCS, AND MARIANA TROUGH BACK-ARC BASIN. EARTHCHEM LIBRARY.	MARA-9-1	IBM	17.945	144.805	OLIVINE	87.0395	810.355	50.256	0.942	14.951	7.964	10.298	11.041	0.244	2.634	0.089	71.3914
RASMUSSEN ET AL. (2022)	HAURI, PLANK, FISCHER, TAMURA AND ISHIZUKA, 2021. MELT INCLUSION DATA FROM THE MARIANAS AND IZU VOLCANIC ARCS, AND MARIANA TROUGH BACK-ARC BASIN. EARTHCHEM LIBRARY.	MARA-9-1	IBM	17.945	144.805	OLIVINE	88.4917	810.355	49.947	1.139	14.554	7.641	10.384	10.583	0.252	2.627	0.152	71.3717
RASMUSSEN ET AL. (2022)	HAURI, PLANK, FISCHER, TAMURA AND ISHIZUKA, 2021. MELT INCLUSION DATA FROM THE MARIANAS AND IZU VOLCANIC ARCS, AND MARIANA TROUGH BACK-ARC BASIN. EARTHCHEM LIBRARY.	MARA-9-1	IBM	17.945	144.805	OLIVINE	88.2222	814.953	49.826	1.174	14.918	6.857	10.495	10.862	0.242	2.771	0.152	74.035
RASMUSSEN ET AL. (2022)	HAURI, PLANK, FISCHER, TAMURA AND ISHIZUKA, 2021. MELT INCLUSION DATA FROM THE MARIANAS AND IZU VOLCANIC ARCS, AND MARIANA TROUGH BACK-ARC BASIN. EARTHCHEM LIBRARY.	MARA-9-1	IBM	17.945	144.805	OLIVINE	86.4182	817.252	50.301	1.418	14.549	7.567	9.603	10.771	0.325	3.074	0.161	71.9271
RASMUSSEN ET AL. (2022)	HAURI, PLANK, FISCHER, TAMURA AND ISHIZUKA, 2021. MELT INCLUSION DATA FROM THE MARIANAS AND IZU VOLCANIC ARCS, AND MARIANA TROUGH BACK-ARC BASIN. EARTHCHEM LIBRARY.	MARA-34-1	IBM	15.877	144.728	OLIVINE	89.6175	820.7	50.282	0.951	15.391	6.69	10.951	11.387	0.193	2.459	0.116	75.3923
RASMUSSEN ET AL. (2022)	HAURI, PLANK, FISCHER, TAMURA AND ISHIZUKA, 2021. MELT INCLUSION DATA FROM THE MARIANAS AND IZU VOLCANIC ARCS, AND MARIANA TROUGH BACK-ARC BASIN. EARTHCHEM LIBRARY.	MARA-9-1	IBM	17.945	144.805	OLIVINE	86.9468	820.7	49.943	0.796	15.558	6.701	11.593	10.984	0.218	2.241	0.109	74.6867
RASMUSSEN ET AL. (2022)	HAURI, PLANK, FISCHER, TAMURA AND ISHIZUKA, 2021. MELT INCLUSION DATA FROM THE MARIANAS AND IZU VOLCANIC ARCS, AND MARIANA TROUGH BACK-ARC BASIN. EARTHCHEM LIBRARY.	ALV-1846-9	IBM	18.33	144.67	OLIVINE	89.0527	825.298	49.241	0.539	17.003	7.194	13.93	7.155	0.725	2.061	0.1	64.1608
RASMUSSEN ET AL. (2022)	HAURI, PLANK, FISCHER, TAMURA AND ISHIZUKA, 2021. MELT INCLUSION DATA FROM THE MARIANAS AND IZU VOLCANIC ARCS, AND MARIANA TROUGH BACK-ARC BASIN. EARTHCHEM LIBRARY.	MARA-34-1	IBM	15.877	144.728	OLIVINE	87.2117	832.769	50.189	1.284	14.688	8.318	10.083	11.115	0.213	2.711	0.121	70.6337
RASMUSSEN ET AL. (2022)	HAURI, PLANK, FISCHER, TAMURA AND ISHIZUKA, 2021. MELT INCLUSION DATA FROM THE MARIANAS AND IZU VOLCANIC ARCS, AND MARIANA TROUGH BACK-ARC BASIN. EARTHCHEM LIBRARY.	MARA-9-1	IBM	17.945	144.805	OLIVINE	86.2766	840.241	50.602	0.898	15.157	7.886	10.426	11.45	0.244	2.617	0.094	72.3259
RASMUSSEN ET AL. (2022)	HAURI, PLANK, FISCHER, TAMURA AND ISHIZUKA, 2021. MELT INCLUSION DATA FROM THE MARIANAS AND IZU VOLCANIC ARCS, AND MARIANA TROUGH BACK-ARC BASIN. EARTHCHEM LIBRARY.	MARA-9-1	IBM	17.945	144.805	OLIVINE	86.939	841.965	50.214	1.343	14.2	8.837	10.213	9.983	0.297	3.081	0.145	67.034
RASMUSSEN ET AL. (2022)	HAURI, PLANK, FISCHER, TAMURA AND ISHIZUKA, 2021. MELT INCLUSION DATA FROM THE MARIANAS AND IZU VOLCANIC ARCS, AND MARIANA TROUGH BACK-ARC BASIN. EARTHCHEM LIBRARY.	WOK-20D	IBM	17.945	144.805	OLIVINE	89.0128	843.689	50.675	1.068	17.263	7.21	11.611	7.467	0.2	3.108	0.1	65.0858
RASMUSSEN ET AL. (2022)	HAURI, PLANK, FISCHER, TAMURA AND ISHIZUKA, 2021. MELT INCLUSION DATA FROM THE MARIANAS AND IZU VOLCANIC ARCS, AND MARIANA TROUGH BACK-ARC BASIN. EARTHCHEM LIBRARY.	MARA8-5	IBM	17.953	144.797	OLIVINE	88.3769	847.137	51.842	0.813	17.77	6.519	12.71	5.626	0.48	2.627	0.129	60.837
RASMUSSEN ET AL. (2022)	HAURI, PLANK, FISCHER, TAMURA AND ISHIZUKA, 2021. MELT INCLUSION DATA FROM THE MARIANAS AND IZU VOLCANIC ARCS, AND MARIANA TROUGH BACK-ARC BASIN. EARTHCHEM LIBRARY.	ALV-1846-9	IBM	18.33	144.67	OLIVINE	89.3085	851.735	49.642	0.494	17.465	6.308	14.764	6.496	0.735	2.001	0.096	64.9571
RASMUSSEN ET AL. (2022)	HAURI, PLANK, FISCHER, TAMURA AND ISHIZUKA, 2021. MELT INCLUSION DATA FROM THE MARIANAS AND IZU VOLCANIC ARCS, AND MARIANA TROUGH BACK-ARC BASIN. EARTHCHEM LIBRARY.	MARA-34-1	IBM	15.877	144.728	OLIVINE	88.9727	852.884	49.757	0.952	14.885	7.153	11.08	11.242	0.199	2.485	0.098	73.8833
RASMUSSEN ET AL. (2022)	HAURI, PLANK, FISCHER, TAMURA AND ISHIZUKA, 2021. MELT INCLUSION DATA FROM THE MARIANAS AND IZU VOLCANIC ARCS, AND MARIANA TROUGH BACK-ARC BASIN. EARTHCHEM LIBRARY.	ALV-1846-9	IBM	18.33	144.67	OLIVINE	89.1605	857.482	50.141	0.526	17.009	6.423	15.367	6.037	0.647	1.921	0.131	62.8505
RASMUSSEN ET AL. (2022)	HAURI, PLANK, FISCHER, TAMURA AND ISHIZUKA, 2021. MELT INCLUSION DATA FROM THE MARIANAS AND IZU VOLCANIC ARCS, AND MARIANA TROUGH BACK-ARC BASIN. EARTHCHEM LIBRARY.	ALV-1846-9	IBM	18.33	144.67	OLIVINE	88.9298	864.379	49.301	0.544	17.18	7.002	13.993	7.182	0.798	2.017	0.099	64.8663
RASMUSSEN ET AL. (2022)	HAURI, PLANK, FISCHER, TAMURA AND ISHIZUKA, 2021. MELT INCLUSION DATA FROM THE MARIANAS AND IZU VOLCANIC ARCS, AND MARIANA TROUGH BACK-ARC BASIN. EARTHCHEM LIBRARY.	ALV-1833-1	IBM	18.07	144.75	OLIVINE	87.1569	868.977	52.76	1.017	16.501	6.364	12.03	5.257	0.161	3.013	0.129	59.7892
RASMUSSEN ET AL. (2022)	HAURI, PLANK, FISCHER, TAMURA AND ISHIZUKA, 2021. MELT INCLUSION DATA FROM THE MARIANAS AND IZU VOLCANIC ARCS, AND MARIANA TROUGH BACK-ARC BASIN. EARTHCHEM LIBRARY.	ALV-1841-8	IBM	18.25	144.7	OLIVINE	87.2649	869.551	50.013	1.186	17.01	7.834	12.029	7.181	0.233	2.869	0.148	62.2636
RASMUSSEN ET AL. (2022)	HAURI, PLANK, FISCHER, TAMURA AND ISHIZUKA, 2021. MELT INCLUSION DATA FROM THE MARIANAS AND IZU VOLCANIC ARCS, AND MARIANA TROUGH BACK-ARC BASIN. EARTHCHEM LIBRARY.	MARA-38D	IBM	17.383	145.015	OLIVINE	86.5613	870.126	50.252	1.262	15.059	8.528	10.855	10.213	0.195	3.118	0.278	68.3108
RASMUSSEN ET AL. (2022)	HAURI, PLANK, FISCHER, TAMURA AND ISHIZUKA, 2021. MELT INCLUSION DATA FROM THE MARIANAS AND IZU VOLCANIC ARCS, AND MARIANA TROUGH BACK-ARC BASIN. EARTHCHEM LIBRARY.	ALV-1846-9	IBM	18.33	144.67	OLIVINE	89.2623	873	49.599	0.515	17.321	6.928	14.615	6.739	0.742	2.021	0.12	63.6482
RASMUSSEN ET AL. (2022)	HAURI, PLANK, FISCHER, TAMURA AND ISHIZUKA, 2021. MELT INCLUSION DATA FROM THE MARIANAS AND IZU VOLCANIC ARCS, AND MARIANA TROUGH BACK-ARC BASIN. EARTHCHEM LIBRARY.	MARA-34-1	IBM	15.877	144.728	OLIVINE	87.9423	875.299	49.868	0.866	15.193	7.259	11.045	11.451	0.313	2.504	0.114	73.9548
RASMUSSEN ET AL. (2022)	HAURI, PLANK, FISCHER, TAMURA AND ISHIZUKA, 2021. MELT INCLUSION DATA FROM THE MARIANAS AND IZU VOLCANIC ARCS, AND MARIANA TROUGH BACK-ARC BASIN. EARTHCHEM LIBRARY.	MARA-9-1	IBM	17.945	144.805	OLIVINE	88.1986	875.299	49.948	1.241	14.487	8.792	10.561	10.047	0.186	3.122	0.142	67.2875
RASMUSSEN ET AL. (2022)	HAURI, PLANK, FISCHER, TAMURA AND ISHIZUKA, 2021. MELT INCLUSION DATA FROM THE MARIANAS AND IZU VOLCANIC ARCS, AND MARIANA TROUGH BACK-ARC BASIN. EARTHCHEM LIBRARY.	ALV-1841-8	IBM	18.25	144.7	OLIVINE	88.039	881.62	50.515	1.138	16.036	7.584	12.731	6.715	0.236	2.92	0.135	61.4458
RASMUSSEN ET AL. (2022)	HAURI, PLANK, FISCHER, TAMURA AND ISHIZUKA, 2021. MELT INCLUSION DATA FROM THE MARIANAS AND IZU VOLCANIC ARCS, AND MARIANA TROUGH BACK-ARC BASIN. EARTHCHEM LIBRARY.	MARA-34-1	IBM	15.877	144.728	OLIVINE	88.7708	882.195	47.714	0.312	17.108	7.914	11.543	11.493	0.063	2.327	0.055	72.33
RASMUSSEN ET AL. (2022)	HAURI, PLANK, FISCHER, TAMURA AND ISHIZUKA, 2021. MELT INCLUSION DATA FROM THE MARIANAS AND IZU VOLCANIC ARCS, AND MARIANA TROUGH BACK-ARC BASIN. EARTHCHEM LIBRARY.	ALV-1841-8	IBM	18.25	144.7	OLIVINE	87.341	882.195	50.447	1.156	15.814	7.865	12.617	6.919	0.233	3.04	0.139	61.2928
RASMUSSEN ET AL. (2022)	HAURI, PLANK, FISCHER, TAMURA AND ISHIZUKA, 2021. MELT INCLUSION DATA FROM THE MARIANAS AND IZU VOLCANIC ARCS, AND MARIANA TROUGH BACK-ARC BASIN. EARTHCHEM LIBRARY.	MARA-34-1	IBM	15.877	144.728	OLIVINE	89.0966	883.919	50.541	0.918	15.16	7.335	10.896	11.482	0.213	2.602	0.103	73.806
RASMUSSEN ET AL. (2022)	HAURI, PLANK, FISCHER, TAMURA AND ISHIZUKA, 2021. MELT INCLUSION DATA FROM THE MARIANAS AND IZU VOLCANIC ARCS, AND MARIANA TROUGH BACK-ARC BASIN. EARTHCHEM LIBRARY.	MARA-38D	IBM	17.383	145.015	OLIVINE	86.0582	887.942	50.948	1.232	14.737	8.527	10.598	10.092	0.151	3.212	0.138	68.0548
RASMUSSEN ET AL. (2022)	HAURI, PLANK, FISCHER, TAMURA AND ISHIZUKA, 2021. MELT INCLUSION DATA FROM THE MARIANAS AND IZU VOLCANIC ARCS, AND MARIANA TROUGH BACK-ARC BASIN. EARTHCHEM LIBRARY.	ALV-1846-9	IBM	18.33	144.67	OLIVINE	89.1605	891.965	50.508	0.534	17.95	6.283	15.343	5.623	0.693	2.008	0.101	61.6993
RASMUSSEN ET AL. (2022)	HAURI, PLANK, FISCHER, TAMURA AND ISHIZUKA, 2021. MELT INCLUSION DATA FROM THE MARIANAS AND IZU VOLCANIC ARCS, AND MARIANA TROUGH BACK-ARC BASIN. EARTHCHEM LIBRARY.	MARA8-5	IBM	17.953	144.797	OLIVINE	88.3888	894.839	51.847	0.838	17.808	6.474	12.65	5.639	0.476	2.606	0.13	61.0568
RASMUSSEN ET AL. (2022)	HAURI, PLANK, FISCHER, TAMURA AND ISHIZUKA, 2021. MELT INCLUSION DATA FROM THE MARIANAS AND IZU VOLCANIC ARCS, AND MARIANA TROUGH BACK-ARC BASIN. EARTHCHEM LIBRARY.	ALV-1846-9	IBM	18.33	144.67	OLIVINE	89.3682	898.287	49.754	0.553	17.676	6.434	14.995	5.553	0.705	2.084	0.113	60.8385
RASMUSSEN ET AL. (2022)	HAURI, PLANK, FISCHER, TAMURA AND ISHIZUKA, 2021. MELT INCLUSION DATA FROM THE MARIANAS AND IZU VOLCANIC ARCS, AND MARIANA TROUGH BACK-ARC BASIN. EARTHCHEM LIBRARY.	WOK-20D	IBM	18.33	144.67	OLIVINE	88.1337	900.012	49.588	1.159	16.634	7.83	12.263	7.314	0.141	2.956	0.11	62.7058
RASMUSSEN ET AL. (2022)	HAURI, PLANK, FISCHER, TAMURA AND ISHIZUKA, 2021. MELT INCLUSION DATA FROM THE MARIANAS AND IZU VOLCANIC ARCS, AND MARIANA TROUGH BACK-ARC BASIN. EARTHCHEM LIBRARY.	WOK-20D	IBM	18.33	144.67	OLIVINE	88.1337	904.609	49.736	1.133	17.027	7.986	12.419	7.296	0.146	3.005	0.102	62.1854
RASMUSSEN ET AL. (2022)	HAURI, PLANK, FISCHER, TAMURA AND ISHIZUKA, 2021. MELT INCLUSION DATA FROM THE MARIANAS AND IZU VOLCANIC ARCS, AND MARIANA TROUGH BACK-ARC BASIN. EARTHCHEM LIBRARY.	MARA-34-1	IBM	15.877	144.728	OLIVINE	87.1827	905.184	49.865	1.16	14.741	8.377	9.174	11.253	0.397	2.853	0.139	70.7429
RASMUSSEN ET AL. (2022)	HAURI, PLANK, FISCHER, TAMURA AND ISHIZUKA, 2021. MELT INCLUSION DATA FROM THE MARIANAS AND IZU VOLCANIC ARCS, AND MARIANA TROUGH BACK-ARC BASIN. EARTHCHEM LIBRARY.	MARA-9-1	IBM	17.945	144.805	OLIVINE	88.0579	907.483	50.054	1.437	14.504	8.223	9.742	10.324	0.325	3.044	0.153	69.3243
RASMUSSEN ET AL. (2022)	HAURI, PLANK, FISCHER, TAMURA AND ISHIZUKA, 2021. MELT INCLUSION DATA FROM THE MARIANAS AND IZU VOLCANIC ARCS, AND MARIANA TROUGH BACK-ARC BASIN. EARTHCHEM LIBRARY.	MARA-34-1	IBM	15.877	144.728	OLIVINE	87.1941	908.058	48.901	0.804	14.356	8.605	10.673	10.861	0.261	2.311	0.1	69.4368
RASMUSSEN ET AL. (2022)	HAURI, PLANK, FISCHER, TAMURA AND ISHIZUKA, 2021. MELT INCLUSION DATA FROM THE MARIANAS AND IZU VOLCANIC ARCS, AND MARIANA TROUGH BACK-ARC BASIN. EARTHCHEM LIBRARY.	WOK-20D	IBM	18.33	144.67	OLIVINE	88.2687	914.954	49.948	1.158	16.818	7.809	12.321	7.286	0.171	2.946	0.108	62.6789
RASMUSSEN ET AL. (2022)	HAURI, PLANK, FISCHER, TAMURA AND ISHIZUKA, 2021. MELT INCLUSION DATA FROM THE MARIANAS AND IZU VOLCANIC ARCS, AND MARIANA TROUGH BACK-ARC BASIN. EARTHCHEM LIBRARY.	ALV-1841-8	IBM	18.25	144.7	OLIVINE	88.0276	923.575	51.099	1.176	16.282	7.503	12.618	7.065	0.198	3.007	0.099	62.8932
RASMUSSEN ET AL. (2022)	HAURI, PLANK, FISCHER, TAMURA AND ISHIZUKA, 2021. MELT INCLUSION DATA FROM THE MARIANAS AND IZU VOLCANIC ARCS, AND MARIANA TROUGH BACK-ARC BASIN. EARTHCHEM LIBRARY.	MARA-18-6	IBM	17.948	144.763	OLIVINE	88.0048	924.724	52.549	1.408	16.997	6.301	12.161	5.43	0.334	3.025	0.165	60.8025
RASMUSSEN ET AL. (2022)	HAURI, PLANK, FISCHER, TAMURA AND ISHIZUKA, 2021. MELT INCLUSION DATA FROM THE MARIANAS AND IZU VOLCANIC ARCS, AND MARIANA TROUGH BACK-ARC BASIN. EARTHCHEM LIBRARY.	ALV-1846-9	IBM	18.33	144.67	OLIVINE	88.9298	927.598	49.382	0.543	17.271	6.857	14.532	6.551	0.761	1.991	0.1	63.2309
RASMUSSEN ET AL. (2022)	HAURI, PLANK, FISCHER, TAMURA AND ISHIZUKA, 2021. MELT INCLUSION DATA FROM THE MARIANAS AND IZU VOLCANIC ARCS, AND MARIANA TROUGH BACK-ARC BASIN. EARTHCHEM LIBRARY.	MARA-34-1	IBM	15.877	144.728	OLIVINE	86.869	937.368	50.304	1.217	14.999	8.325	9.059	11.254	0.29	2.942	0.145	70.8735
RASMUSSEN ET AL. (2022)	HAURI, PLANK, FISCHER, TAMURA AND ISHIZUKA, 2021. MELT INCLUSION DATA FROM THE MARIANAS AND IZU VOLCANIC ARCS, AND MARIANA TROUGH BACK-ARC BASIN. EARTHCHEM LIBRARY.	ALV-1841-8	IBM	18.25	144.7	OLIVINE	87.9082	945.414	50.305	1.177	15.807	7.693	12.497	6.989	0.213	2.951	0.111	62.0534
RASMUSSEN ET AL. (2022)	HAURI, PLANK, FISCHER, TAMURA AND ISHIZUKA, 2021. MELT INCLUSION DATA FROM THE MARIANAS AND IZU VOLCANIC ARCS, AND MARIANA TROUGH BACK-ARC BASIN. EARTHCHEM LIBRARY.	MARA-38D	IBM	17.383	145.015	OLIVINE	85.5802	953.46	50.191	1.303	14.57	9.185	10.689	10.157	0.182	3.061	0.123	66.5606
RASMUSSEN ET AL. (2022)	HAURI, PLANK, FISCHER, TAMURA AND ISHIZUKA, 2021. MELT INCLUSION DATA FROM THE MARIANAS AND IZU VOLCANIC ARCS, AND MARIANA TROUGH BACK-ARC BASIN. EARTHCHEM LIBRARY.	ALV-1841-8	IBM	18.25	144.7	OLIVINE	86.1395	954.61	50.433	1.208	16.752	7.731	12.036	7.365	0.241	3.012	0.129	63.1647
RASMUSSEN ET AL. (2022)	HAURI, PLANK, FISCHER, TAMURA AND ISHIZUKA, 2021. MELT INCLUSION DATA FROM THE MARIANAS AND IZU VOLCANIC ARCS, AND MARIANA TROUGH BACK-ARC BASIN. EARTHCHEM LIBRARY.	MARA-34-1	IBM	15.877	144.728	OLIVINE	85.7895	958.058	50.572	1.184	14.309	8.605	9.612	11.204	0.234	3.008	0.13	70.0927
RASMUSSEN ET AL. (2022)	HAURI, PLANK, FISCHER, TAMURA AND ISHIZUKA, 2021. MELT INCLUSION DATA FROM THE MARIANAS AND IZU VOLCANIC ARCS, AND MARIANA TROUGH BACK-ARC BASIN. EARTHCHEM LIBRARY.	MARA-34-1	IBM	15.877	144.728	OLIVINE	87.1827	963.231	50.175	1.188	14.876	8.206	9.133	11.223	0.389	3.006	0.153	71.1132
RASMUSSEN ET AL. (2022)	HAURI, PLANK, FISCHER, TAMURA AND ISHIZUKA, 2021. MELT INCLUSION DATA FROM THE MARIANAS AND IZU VOLCANIC ARCS, AND MARIANA TROUGH BACK-ARC BASIN. EARTHCHEM LIBRARY.	MARA-34-1	IBM	15.877	144.728	OLIVINE	88.8579	964.38	50.255	0.971	15.078	7.069	10.752	11.333	0.282	2.661	0.118	74.265
RASMUSSEN ET AL. (2022)	HAURI, PLANK, FISCHER, TAMURA AND ISHIZUKA, 2021. MELT INCLUSION DATA FROM THE MARIANAS AND IZU VOLCANIC ARCS, AND MARIANA TROUGH BACK-ARC BASIN. EARTHCHEM LIBRARY.	673-R28 Izx	IBM	28.5773	140.542	OLIVINE	88.4681	970.12	49.0148	1.0792	19.6106	6.0544	10.6907	5.739	0.7123	3.6768	0.3017	63.0482
RASMUSSEN ET AL. (2022)	HAURI, PLANK, FISCHER, TAMURA AND ISHIZUKA, 2021. MELT INCLUSION DATA FROM THE MARIANAS AND IZU VOLCANIC ARCS, AND MARIANA TROUGH BACK-ARC BASIN. EARTHCHEM LIBRARY.	MARA-34-1	IBM	15.877	144.728	OLIVINE	86.6307	970.127	49.607	1.257	14.491	8.868	9.786	10.536	0.231	2.846	0.175	68.1383
RASMUSSEN ET AL. (2022)	HAURI, PLANK, FISCHER, TAMURA AND ISHIZUKA, 2021. MELT INCLUSION DATA FROM THE MARIANAS AND IZU VOLCANIC ARCS, AND MARIANA TROUGH BACK-ARC BASIN. EARTHCHEM LIBRARY.	MARA8-5	IBM	17.953	144.797	OLIVINE	88.4245	978.173	52.227	0.993	17.618	6.224	12.956	5.178	0.235	2.98	0.073	59.9599
RASMUSSEN ET AL. (2022)	HAURI, PLANK, FISCHER, TAMURA AND ISHIZUKA, 2021. MELT INCLUSION DATA FROM THE MARIANAS AND IZU VOLCANIC ARCS, AND MARIANA TROUGH BACK-ARC BASIN. EARTHCHEM LIBRARY.	MARA-34-1	IBM	15.877	144.728	OLIVINE	87.3824	980.472	49.326	1.041	15.051	8.244	10.412	10.737	0.318	2.522	0.11	70.0986
RASMUSSEN ET AL. (2022)	HAURI, PLANK, FISCHER, TAMURA AND ISHIZUKA, 2021. MELT INCLUSION DATA FROM THE MARIANAS AND IZU VOLCANIC ARCS, AND MARIANA TROUGH BACK-ARC BASIN. EARTHCHEM LIBRARY.	WOK-20D	IBM	18.33	144.67	OLIVINE	88.0508	986.794	51.085	1.06	15.496	8.121	12.906	7.276	0.099	2.514	0.154	61.7255
RASMUSSEN ET AL. (2022)	HAURI, PLANK, FISCHER, TAMURA AND ISHIZUKA, 2021. MELT INCLUSION DATA FROM THE MARIANAS AND IZU VOLCANIC ARCS, AND MARIANA TROUGH BACK-ARC BASIN. EARTHCHEM LIBRARY.	MARA-38D	IBM	17.383	145.015	OLIVINE	86.0582	989.668	50.105	1.27	14.811	9.101	10.742	10.101	0.177	3.144	0.121	66.642
RASMUSSEN ET AL. (2022)	HAURI, PLANK, FISCHER, TAMURA AND ISHIZUKA, 2021. MELT INCLUSION DATA FROM THE MARIANAS AND IZU VOLCANIC ARCS, AND MARIANA TROUGH BACK-ARC BASIN. EARTHCHEM LIBRARY.	MARA-34-1	IBM	15.877	144.728	OLIVINE	87.5725	994.84	49.494	1.039	14.803	8.018	10.476	10.882	0.338	2.625	0.145	70.9552
RASMUSSEN ET AL. (2022)	HAURI, PLANK, FISCHER, TAMURA AND ISHIZUKA, 2021. MELT INCLUSION DATA FROM THE MARIANAS AND IZU VOLCANIC ARCS, AND MARIANA TROUGH BACK-ARC BASIN. EARTHCHEM LIBRARY.	MARA-38D	IBM	17.383	145.015	OLIVINE	85.5938	996.564	49.653	1.295	14.503	9.084	10.874	9.325	0.171	2.95	0.133	64.8846
RASMUSSEN ET AL. (2022)	HAURI, PLANK, FISCHER, TAMURA AND ISHIZUKA, 2021. MELT INCLUSION DATA FROM THE MARIANAS AND IZU VOLCANIC ARCS, AND MARIANA TROUGH BACK-ARC BASIN. EARTHCHEM LIBRARY.	MARA-9-1	IBM	17.945	144.805	OLIVINE	87.403	1001.16	50.035	1.365	14.584	8.243	10.777	10.38	0.2	2.728	0.153	69.3876
RASMUSSEN ET AL. (2022)	HAURI, PLANK, FISCHER, TAMURA AND ISHIZUKA, 2021. MELT INCLUSION DATA FROM THE MARIANAS AND IZU VOLCANIC ARCS, AND MARIANA TROUGH BACK-ARC BASIN. EARTHCHEM LIBRARY.	MARA-9-1	IBM	17.945	144.805	OLIVINE	85.8393	1004.61	50.209	1.308	14.092	9.209	9.914	10.389	0.216	2.972	0.144	67.0037
RASMUSSEN ET AL. (2022)	HAURI, PLANK, FISCHER, TAMURA AND ISHIZUKA, 2021. MELT INCLUSION DATA FROM THE MARIANAS AND IZU VOLCANIC ARCS, AND MARIANA TROUGH BACK-ARC BASIN. EARTHCHEM LIBRARY.	MARA-34-1	IBM	15.877	144.728	OLIVINE	88.0829	1011.51	50.194	1.473	15.087	7.797	10.201	11.17	0.264	2.766	0.127	72.0568
RASMUSSEN ET AL. (2022)	HAURI, PLANK, FISCHER, TAMURA AND ISHIZUKA, 2021. MELT INCLUSION DATA FROM THE MARIANAS AND IZU VOLCANIC ARCS, AND MARIANA TROUGH BACK-ARC BASIN. EARTHCHEM LIBRARY.	673-R22 Izx	IBM	28.5763	140.539	OLIVINE	89.0056	1020.54	49.6661	1.0828	19.3644	5.7472	10.7386	5.3603	0.7243	3.6933	0.2553	62.6702
RASMUSSEN ET AL. (2022)	HAURI, PLANK, FISCHER, TAMURA AND ISHIZUKA, 2021. MELT INCLUSION DATA FROM THE MARIANAS AND IZU VOLCANIC ARCS, AND MARIANA TROUGH BACK-ARC BASIN. EARTHCHEM LIBRARY.	D48-4-1	IBM	17.275	145.623	OLIVINE	89.4279	1025.24	51.187	0.844	15.598	7.935	12.459	8.759	1.035	2.081	0.161	66.5207
RASMUSSEN ET AL. (2022)	HAURI, PLANK, FISCHER, TAMURA AND ISHIZUKA, 2021. MELT INCLUSION DATA FROM THE MARIANAS AND IZU VOLCANIC ARCS, AND MARIANA TROUGH BACK-ARC BASIN. EARTHCHEM LIBRARY.	WOK-12D	IBM	18.3	144.67	OLIVINE	86.8678	1028.75	51.786	1.462	16.57	7.528	10.405	6.361	0.343	3.383	0.205	60.3326
RASMUSSEN ET AL. (2022)	HAURI, PLANK, FISCHER, TAMURA AND ISHIZUKA, 2021. MELT INCLUSION DATA FROM THE MARIANAS AND IZU VOLCANIC ARCS, AND MARIANA TROUGH BACK-ARC BASIN. EARTHCHEM LIBRARY.	673-R28 Izx	IBM	28.5773	140.542	OLIVINE	89.074	1033.22	49.9323	0.9823	19.1542	5.4333	10.7335	5.6733	0.7098	3.6534	0.277	65.2719
RASMUSSEN ET AL. (2022)	HAURI, PLANK, FISCHER, TAMURA AND ISHIZUKA, 2021. MELT INCLUSION DATA FROM THE MARIANAS AND IZU VOLCANIC ARCS, AND MARIANA TROUGH BACK-ARC BASIN. EARTHCHEM LIBRARY.	WOK-12D	IBM	18.3	144.67	OLIVINE	87.8257	1051.16	50.225	0.988	17.195	7.557	12.455	6.768	0.332	2.676	0.14	61.7162
RASMUSSEN ET AL. (2022)	HAURI, PLANK, FISCHER, TAMURA AND ISHIZUKA, 2021. MELT INCLUSION DATA FROM THE MARIANAS AND IZU VOLCANIC ARCS, AND MARIANA TROUGH BACK-ARC BASIN. EARTHCHEM LIBRARY.	673-R28 Izx	IBM	28.5773	140.542	OLIVINE	88.518	1072.88	49.4076	1.0435	18.9231	6.0159	10.4544	6.1487	0.6596	3.493	0.2566	64.7854
RASMUSSEN ET AL. (2022)	HAURI, PLANK, FISCHER, TAMURA AND ISHIZUKA, 2021. MELT INCLUSION DATA FROM THE MARIANAS AND IZU VOLCANIC ARCS, AND MARIANA TROUGH BACK-ARC BASIN. EARTHCHEM LIBRARY.	D46-1-4	IBM	17.205	145.583	OLIVINE	86.7003	1074.62	48.794	0.808	16.449	8.725	10.335	9.345	0.545	2.266	0.146	65.8459
RASMUSSEN ET AL. (2022)	HAURI, PLANK, FISCHER, TAMURA AND ISHIZUKA, 2021. MELT INCLUSION DATA FROM THE MARIANAS AND IZU VOLCANIC ARCS, AND MARIANA TROUGH BACK-ARC BASIN. EARTHCHEM LIBRARY.	WOK-20D	IBM	18.33	144.67	OLIVINE	87.4699	1094.84	51.386	1.137	15.086	8.574	12.748	7.11	0.095	2.601	0.109	59.8821
RASMUSSEN ET AL. (2022)	HAURI, PLANK, FISCHER, TAMURA AND ISHIZUKA, 2021. MELT INCLUSION DATA FROM THE MARIANAS AND IZU VOLCANIC ARCS, AND MARIANA TROUGH BACK-ARC BASIN. EARTHCHEM LIBRARY.	MARA-34-1	IBM	15.877	144.728	OLIVINE	87.2488	1095.99	48.703	0.844	15.858	8.873	10.926	11.077	0.295	2.481	0.101	69.2034
RASMUSSEN ET AL. (2022)	HAURI, PLANK, FISCHER, TAMURA AND ISHIZUKA, 2021. MELT INCLUSION DATA FROM THE MARIANAS AND IZU VOLCANIC ARCS, AND MARIANA TROUGH BACK-ARC BASIN. EARTHCHEM LIBRARY.	616-R05 Izx	IBM	30.4073	140.097	OLIVINE	85.8014	1105.93	49.1134	0.6392	16.9346	7.7301	13.2115	6.4302	0.0939	1.8381	0.1055	59.9569
RASMUSSEN ET AL. (2022)	HAURI, PLANK, FISCHER, TAMURA AND ISHIZUKA, 2021. MELT INCLUSION DATA FROM THE MARIANAS AND IZU VOLCANIC ARCS, AND MARIANA TROUGH BACK-ARC BASIN. EARTHCHEM LIBRARY.	MARA8-5	IBM	17.953	144.797	OLIVINE	87.9034	1108.63	52.005	0.798	17.872	6.658	11.148	5.912	0.526	3.008	0.129	61.5136
RASMUSSEN ET AL. (2022)	HAURI, PLANK, FISCHER, TAMURA AND ISHIZUKA, 2021. MELT INCLUSION DATA FROM THE MARIANAS AND IZU VOLCANIC ARCS, AND MARIANA TROUGH BACK-ARC BASIN. EARTHCHEM LIBRARY.	616-R05 Izx	IBM	30.4073	140.097	OLIVINE	85.8539	1127.77	48.9251	0.6378	17.1181	7.7667	12.7676	6.4756	0.086	1.8512	0.0637	60.0124
RASMUSSEN ET AL. (2022)	HAURI, PLANK, FISCHER, TAMURA AND ISHIZUKA, 2021. MELT INCLUSION DATA FROM THE MARIANAS AND IZU VOLCANIC ARCS, AND MARIANA TROUGH BACK-ARC BASIN. EARTHCHEM LIBRARY.	616-R05 Izx	IBM	30.4073	140.097	OLIVINE	86.6295	1128.9	48.873	0.6396	16.5621	7.5196	13.7426	6.3246	0.1013	1.7944	0.0769	60.2219
RASMUSSEN ET AL. (2022)	HAURI, PLANK, FISCHER, TAMURA AND ISHIZUKA, 2021. MELT INCLUSION DATA FROM THE MARIANAS AND IZU VOLCANIC ARCS, AND MARIANA TROUGH BACK-ARC BASIN. EARTHCHEM LIBRARY.	MARA-34-1	IBM	15.877	144.728	OLIVINE	86.2885	1146.57	50.451	1.503	14.373	9.281	9.414	10.483	0.236	2.862	0.212	67.0307
RASMUSSEN ET AL. (2022)	HAURI, PLANK, FISCHER, TAMURA AND ISHIZUKA, 2021. MELT INCLUSION DATA FROM THE MARIANAS AND IZU VOLCANIC ARCS, AND MARIANA TROUGH BACK-ARC BASIN. EARTHCHEM LIBRARY.	MARA8-5	IBM	17.953	144.797	OLIVINE	88.7421	1158.06	51.448	0.833	17.563	6.395	11.893	6.123	0.467	2.513	0.138	63.2817
RASMUSSEN ET AL. (2022)	HAURI, PLANK, FISCHER, TAMURA AND ISHIZUKA, 2021. MELT INCLUSION DATA FROM THE MARIANAS AND IZU VOLCANIC ARCS, AND MARIANA TROUGH BACK-ARC BASIN. EARTHCHEM LIBRARY.	616-R05 Izx	IBM	30.4073	140.097	OLIVINE	85.8189	1213.78	48.9466	0.5855	17.0242	8.0111	12.7831	6.6401	0.1257	1.9743	0.0665	59.8708
RASMUSSEN ET AL. (2022)	HAURI, PLANK, FISCHER, TAMURA AND ISHIZUKA, 2021. MELT INCLUSION DATA FROM THE MARIANAS AND IZU VOLCANIC ARCS, AND MARIANA TROUGH BACK-ARC BASIN. EARTHCHEM LIBRARY.	673-R22 Izx	IBM	28.5763	140.539	OLIVINE	89.0056	1239.73	49.1683	0.9805	18.7217	6.1947	10.8057	5.8023	0.6351	3.4465	0.2355	62.7696
RASMUSSEN ET AL. (2022)	HAURI, PLANK, FISCHER, TAMURA AND ISHIZUKA, 2021. MELT INCLUSION DATA FROM THE MARIANAS AND IZU VOLCANIC ARCS, AND MARIANA TROUGH BACK-ARC BASIN. EARTHCHEM LIBRARY.	616-R08 Izx	IBM	30.4079	140.1	OLIVINE	85.9179	1326.56	48.897	0.6512	17.0594	7.9005	12.8469	6.7838	0.0999	1.9335	0.0739	60.7162
RASMUSSEN ET AL. (2022)	HAURI, PLANK, FISCHER, TAMURA AND ISHIZUKA, 2021. MELT INCLUSION DATA FROM THE MARIANAS AND IZU VOLCANIC ARCS, AND MARIANA TROUGH BACK-ARC BASIN. EARTHCHEM LIBRARY.	666-R24 Izx	IBM	28.5814	140.481	OLIVINE	88.8234	1336.5	48.7054	0.8517	17.4769	6.9184	12.76	6.106	0.3675	2.4174	0.5515	61.3696
RASMUSSEN ET AL. (2022)	HAURI, PLANK, FISCHER, TAMURA AND ISHIZUKA, 2021. MELT INCLUSION DATA FROM THE MARIANAS AND IZU VOLCANIC ARCS, AND MARIANA TROUGH BACK-ARC BASIN. EARTHCHEM LIBRARY.	616-R05 Izx	IBM	30.4073	140.097	OLIVINE	86.1269	1338.71	48.6623	0.6058	16.9627	7.6608	13.0555	6.6798	0.1072	1.9596	0.055	61.082
RASMUSSEN ET AL. (2022)	HAURI, PLANK, FISCHER, TAMURA AND ISHIZUKA, 2021. MELT INCLUSION DATA FROM THE MARIANAS AND IZU VOLCANIC ARCS, AND MARIANA TROUGH BACK-ARC BASIN. EARTHCHEM LIBRARY.	616-R05 Izx	IBM	30.4073	140.097	OLIVINE	86.1101	1347.6	48.7291	0.6479	17.023	7.8433	12.6283	6.4133	0.1583	1.9936	0.0959	59.544
RASMUSSEN ET AL. (2022)	HAURI, PLANK, FISCHER, TAMURA AND ISHIZUKA, 2021. MELT INCLUSION DATA FROM THE MARIANAS AND IZU VOLCANIC ARCS, AND MARIANA TROUGH BACK-ARC BASIN. EARTHCHEM LIBRARY.	616-R05 Izx	IBM	30.4073	140.097	OLIVINE	86.3811	1351.45	48.5738	0.5936	16.9293	7.8916	13.1095	6.519	0.1112	1.8901	0.0685	59.7897
RASMUSSEN ET AL. (2022)	HAURI, PLANK, FISCHER, TAMURA AND ISHIZUKA, 2021. MELT INCLUSION DATA FROM THE MARIANAS AND IZU VOLCANIC ARCS, AND MARIANA TROUGH BACK-ARC BASIN. EARTHCHEM LIBRARY.	666-R24 Izx	IBM	28.5814	140.481	OLIVINE	88.781	1357.92	48.732	0.7313	16.7742	6.9522	14.0087	6.079	0.1726	2.2543	0.1132	61.1487
RASMUSSEN ET AL. (2022)	HAURI, PLANK, FISCHER, TAMURA AND ISHIZUKA, 2021. MELT INCLUSION DATA FROM THE MARIANAS AND IZU VOLCANIC ARCS, AND MARIANA TROUGH BACK-ARC BASIN. EARTHCHEM LIBRARY.	616-R08 Izx	IBM	30.4079	140.1	OLIVINE	85.2661	1363.96	48.904	0.6746	16.6342	8.0242	12.8184	6.6247	0.1178	1.7521	0.1508	59.7757
RASMUSSEN ET AL. (2022)	HAURI, PLANK, FISCHER, TAMURA AND ISHIZUKA, 2021. MELT INCLUSION DATA FROM THE MARIANAS AND IZU VOLCANIC ARCS, AND MARIANA TROUGH BACK-ARC BASIN. EARTHCHEM LIBRARY.	616-R08 Izx	IBM	30.4079	140.1	OLIVINE	86.8372	1364.71	48.9324	0.6073	16.8767	7.4392	12.8717	6.6635	0.1119	2.0462	0.0682	61.7197
RASMUSSEN ET AL. (2022)	HAURI, PLANK, FISCHER, TAMURA AND ISHIZUKA, 2021. MELT INCLUSION DATA FROM THE MARIANAS AND IZU VOLCANIC ARCS, AND MARIANA TROUGH BACK-ARC BASIN. EARTHCHEM LIBRARY.	616-R05 Izx	IBM	30.4073	140.097	OLIVINE	86.1644	1385	48.6461	0.6198	16.9181	7.9285	13.198	6.5278	0.1107	1.8902	0.0967	59.7099
RASMUSSEN ET AL. (2022)	HAURI, PLANK, FISCHER, TAMURA AND ISHIZUKA, 2021. MELT INCLUSION DATA FROM THE MARIANAS AND IZU VOLCANIC ARCS, AND MARIANA TROUGH BACK-ARC BASIN. EARTHCHEM LIBRARY.	616-R05 Izx	IBM	30.4073	140.097	OLIVINE	86.3512	1390.49	49.8957	0.8298	16.7586	7.2802	12.1347	6.4324	0.2683	2.192	0.2134	61.3957
RASMUSSEN ET AL. (2022)	HAURI, PLANK, FISCHER, TAMURA AND ISHIZUKA, 2021. MELT INCLUSION DATA FROM THE MARIANAS AND IZU VOLCANIC ARCS, AND MARIANA TROUGH BACK-ARC BASIN. EARTHCHEM LIBRARY.	616-R05 Izx	IBM	30.4073	140.097	OLIVINE	86.1269	1396.89	49.1998	0.6617	16.9106	7.7865	12.7525	6.5751	0.122	2.0562	0.0911	60.3169
RASMUSSEN ET AL. (2022)	HAURI, PLANK, FISCHER, TAMURA AND ISHIZUKA, 2021. MELT INCLUSION DATA FROM THE MARIANAS AND IZU VOLCANIC ARCS, AND MARIANA TROUGH BACK-ARC BASIN. EARTHCHEM LIBRARY.	HPD-480-R10	IBM	14.6014	144.774	OLIVINE	89.2397	1432.35	47.337	1.025	17.64	4.3	14.024	5.947	0.448	2.303	0.126	71.3421
RASMUSSEN ET AL. (2022)	HAURI, PLANK, FISCHER, TAMURA AND ISHIZUKA, 2021. MELT INCLUSION DATA FROM THE MARIANAS AND IZU VOLCANIC ARCS, AND MARIANA TROUGH BACK-ARC BASIN. EARTHCHEM LIBRARY.	H343-R18 Izx	IBM	30.3824	139.229	OLIVINE	87.7129	1439.09	47.7118	0.764	16.4342	7.553	11.0925	7.1032	1.0501	1.8504	0.2597	62.864
RASMUSSEN ET AL. (2022)	HAURI, PLANK, FISCHER, TAMURA AND ISHIZUKA, 2021. MELT INCLUSION DATA FROM THE MARIANAS AND IZU VOLCANIC ARCS, AND MARIANA TROUGH BACK-ARC BASIN. EARTHCHEM LIBRARY.	668-R02 Izx	IBM	28.6361	140.58	OLIVINE	87.0193	1440.96	48.0932	0.4163	18.0403	7.2344	14.8716	5.9643	0.1266	1.5371	0.0546	59.7421
RASMUSSEN ET AL. (2022)	HAURI, PLANK, FISCHER, TAMURA AND ISHIZUKA, 2021. MELT INCLUSION DATA FROM THE MARIANAS AND IZU VOLCANIC ARCS, AND MARIANA TROUGH BACK-ARC BASIN. EARTHCHEM LIBRARY.	MARA-34-1	IBM	15.877	144.728	OLIVINE	87.1941	1463.24	49.291	0.822	14.684	8.773	10.809	11.189	0.217	2.449	0.106	69.6575
RASMUSSEN ET AL. (2022)	HAURI, PLANK, FISCHER, TAMURA AND ISHIZUKA, 2021. MELT INCLUSION DATA FROM THE MARIANAS AND IZU VOLCANIC ARCS, AND MARIANA TROUGH BACK-ARC BASIN. EARTHCHEM LIBRARY.	616-R05 Izx	IBM	30.4073	140.097	OLIVINE	86.2291	1475.86	48.7764	0.6587	16.7358	7.8334	12.8685	6.6919	0.1209	2.0363	0.0942	60.5942
RASMUSSEN ET AL. (2022)	HAURI, PLANK, FISCHER, TAMURA AND ISHIZUKA, 2021. MELT INCLUSION DATA FROM THE MARIANAS AND IZU VOLCANIC ARCS, AND MARIANA TROUGH BACK-ARC BASIN. EARTHCHEM LIBRARY.	616-R05 Izx	IBM	30.4073	140.097	OLIVINE	86.8744	1533.13	47.0417	1.5161	16.736	7.8861	13.716	6.686	0.102	1.6732	0.1145	60.4129
RASMUSSEN ET AL. (2022)	HAURI, PLANK, FISCHER, TAMURA AND ISHIZUKA, 2021. MELT INCLUSION DATA FROM THE MARIANAS AND IZU VOLCANIC ARCS, AND MARIANA TROUGH BACK-ARC BASIN. EARTHCHEM LIBRARY.	616-R05 Izx	IBM	30.4073	140.097	OLIVINE	86.0794	1535.06	48.4192	0.6305	17.0236	8.0006	12.9973	6.724	0.1485	1.8484	0.0833	60.2035
RASMUSSEN ET AL. (2022)	HAURI, PLANK, FISCHER, TAMURA AND ISHIZUKA, 2021. MELT INCLUSION DATA FROM THE MARIANAS AND IZU VOLCANIC ARCS, AND MARIANA TROUGH BACK-ARC BASIN. EARTHCHEM LIBRARY.	616-R08 Izx	IBM	30.4079	140.1	OLIVINE	86.2733	1549.15	49.1278	0.7615	16.639	7.8318	12.5472	6.4597	0.1347	2.1271	0.1205	59.7528
RASMUSSEN ET AL. (2022)	HAURI, PLANK, FISCHER, TAMURA AND ISHIZUKA, 2021. MELT INCLUSION DATA FROM THE MARIANAS AND IZU VOLCANIC ARCS, AND MARIANA TROUGH BACK-ARC BASIN. EARTHCHEM LIBRARY.	04-ALA-02	IBM	17.5864	145.838	OLIVINE	85.4678	1561.94	45.675	0.527	17.167	8.648	13.512	7.075	0.384	1.327	0.087	59.5567
RASMUSSEN ET AL. (2022)	HAURI, PLANK, FISCHER, TAMURA AND ISHIZUKA, 2021. MELT INCLUSION DATA FROM THE MARIANAS AND IZU VOLCANIC ARCS, AND MARIANA TROUGH BACK-ARC BASIN. EARTHCHEM LIBRARY.	616-R08 Izx	IBM	30.4079	140.1	OLIVINE	86.1217	1582.67	48.5413	0.6078	16.4853	7.858	13.7242	6.7639	0.1483	1.6755	0.105	60.7748
RASMUSSEN ET AL. (2022)	HAURI, PLANK, FISCHER, TAMURA AND ISHIZUKA, 2021. MELT INCLUSION DATA FROM THE MARIANAS AND IZU VOLCANIC ARCS, AND MARIANA TROUGH BACK-ARC BASIN. EARTHCHEM LIBRARY.	04-ALA-03	IBM	17.5866	145.838	OLIVINE	86.4255	1587.82	45.309	0.595	18.566	7.79	14.266	6.689	0.465	1.681	0.098	60.7165
RASMUSSEN ET AL. (2022)	HAURI, PLANK, FISCHER, TAMURA AND ISHIZUKA, 2021. MELT INCLUSION DATA FROM THE MARIANAS AND IZU VOLCANIC ARCS, AND MARIANA TROUGH BACK-ARC BASIN. EARTHCHEM LIBRARY.	616-R05 Izx	IBM	30.4073	140.097	OLIVINE	86.5096	1602.82	48.6209	0.6323	17.2537	7.6345	13.0585	6.3963	0.1045	2.1271	0.071	60.1287
RASMUSSEN ET AL. (2022)	HAURI, PLANK, FISCHER, TAMURA AND ISHIZUKA, 2021. MELT INCLUSION DATA FROM THE MARIANAS AND IZU VOLCANIC ARCS, AND MARIANA TROUGH BACK-ARC BASIN. EARTHCHEM LIBRARY.	D46-1-1	IBM	17.205	145.583	OLIVINE	89.4132	1603.61	49.028	0.85	15.852	6.885	12.015	9.242	0.53	2.178	0.151	70.7278
RASMUSSEN ET AL. (2022)	HAURI, PLANK, FISCHER, TAMURA AND ISHIZUKA, 2021. MELT INCLUSION DATA FROM THE MARIANAS AND IZU VOLCANIC ARCS, AND MARIANA TROUGH BACK-ARC BASIN. EARTHCHEM LIBRARY.	616-R05 Izx	IBM	30.4073	140.097	OLIVINE	85.7977	1605.53	48.6821	0.641	17.0959	8.0732	12.7033	6.6309	0.1722	1.8478	0.0932	59.6518
RASMUSSEN ET AL. (2022)	HAURI, PLANK, FISCHER, TAMURA AND ISHIZUKA, 2021. MELT INCLUSION DATA FROM THE MARIANAS AND IZU VOLCANIC ARCS, AND MARIANA TROUGH BACK-ARC BASIN. EARTHCHEM LIBRARY.	616-R05 Izx	IBM	30.4073	140.097	OLIVINE	86.5096	1606.08	48.6526	0.6307	17.265	7.5369	13.0567	6.194	0.1186	2.0634	0.071	59.6657
RASMUSSEN ET AL. (2022)	HAURI, PLANK, FISCHER, TAMURA AND ISHIZUKA, 2021. MELT INCLUSION DATA FROM THE MARIANAS AND IZU VOLCANIC ARCS, AND MARIANA TROUGH BACK-ARC BASIN. EARTHCHEM LIBRARY.	HPD-480-R10	IBM	14.6014	144.774	OLIVINE	85.698	1672.03	47.979	0.796	17.54	6.93283	12.281	6.757	0.553	2.016	0.136	63.6938
RASMUSSEN ET AL. (2022)	HAURI, PLANK, FISCHER, TAMURA AND ISHIZUKA, 2021. MELT INCLUSION DATA FROM THE MARIANAS AND IZU VOLCANIC ARCS, AND MARIANA TROUGH BACK-ARC BASIN. EARTHCHEM LIBRARY.	668-R02 Izx	IBM	28.6361	140.58	OLIVINE	88.3905	1707.86	46.1612	0.8268	20.8451	6.4477	13.3921	5.8801	0.3805	2.8035	0.1265	62.1433
RASMUSSEN ET AL. (2022)	HAURI, PLANK, FISCHER, TAMURA AND ISHIZUKA, 2021. MELT INCLUSION DATA FROM THE MARIANAS AND IZU VOLCANIC ARCS, AND MARIANA TROUGH BACK-ARC BASIN. EARTHCHEM LIBRARY.	664-R26 Izx	IBM	28.5581	140.203	OLIVINE	89.2245	1762.13	49.5482	0.7172	17.941	6.4756	12.255	5.6092	0.6164	2.6072	0.2048	60.9248
RASMUSSEN ET AL. (2022)	HAURI, PLANK, FISCHER, TAMURA AND ISHIZUKA, 2021. MELT INCLUSION DATA FROM THE MARIANAS AND IZU VOLCANIC ARCS, AND MARIANA TROUGH BACK-ARC BASIN. EARTHCHEM LIBRARY.	616-R05 Izx	IBM	30.4073	140.097	OLIVINE	85.9195	1770.83	48.6076	0.6297	17.0253	7.835	12.661	6.6255	0.1608	1.981	0.0675	60.351
RASMUSSEN ET AL. (2022)	HAURI, PLANK, FISCHER, TAMURA AND ISHIZUKA, 2021. MELT INCLUSION DATA FROM THE MARIANAS AND IZU VOLCANIC ARCS, AND MARIANA TROUGH BACK-ARC BASIN. EARTHCHEM LIBRARY.	616-R05 Izx	IBM	30.4073	140.097	OLIVINE	86.1269	1812.68	48.534	0.615	17.0069	7.7699	12.9022	6.6496	0.1435	1.9442	0.1109	60.6372
RASMUSSEN ET AL. (2022)	HAURI, PLANK, FISCHER, TAMURA AND ISHIZUKA, 2021. MELT INCLUSION DATA FROM THE MARIANAS AND IZU VOLCANIC ARCS, AND MARIANA TROUGH BACK-ARC BASIN. EARTHCHEM LIBRARY.	D46-1-1	IBM	17.205	145.583	OLIVINE	89.3888	1849.95	46.969	0.88	15.262	9.599	12.408	8.392	0.501	2.073	0.129	61.1449
RASMUSSEN ET AL. (2022)	HAURI, PLANK, FISCHER, TAMURA AND ISHIZUKA, 2021. MELT INCLUSION DATA FROM THE MARIANAS AND IZU VOLCANIC ARCS, AND MARIANA TROUGH BACK-ARC BASIN. EARTHCHEM LIBRARY.	04-ALA-02	IBM	17.5864	145.838	OLIVINE	86.5543	1961.98	45.557	0.526	16.711	8.327	13.996	6.901	0.399	1.234	0.101	59.8676
RASMUSSEN ET AL. (2022)	HAURI, PLANK, FISCHER, TAMURA AND ISHIZUKA, 2021. MELT INCLUSION DATA FROM THE MARIANAS AND IZU VOLCANIC ARCS, AND MARIANA TROUGH BACK-ARC BASIN. EARTHCHEM LIBRARY.	D46-1-2	IBM	17.205	145.583	OLIVINE	91.4537	1966.57	49.574	1.094	18.281	5.61	14.257	5.022	0.671	2.761	0.185	61.7054
RASMUSSEN ET AL. (2022)	HAURI, PLANK, FISCHER, TAMURA AND ISHIZUKA, 2021. MELT INCLUSION DATA FROM THE MARIANAS AND IZU VOLCANIC ARCS, AND MARIANA TROUGH BACK-ARC BASIN. EARTHCHEM LIBRARY.	D48-4-1	IBM	17.275	145.623	OLIVINE	89.7742	2049.88	48.421	0.886	13.601	7.99	13.218	8.724	0.514	1.797	0.119	66.2772
RASMUSSEN ET AL. (2022)	HAURI, PLANK, FISCHER, TAMURA AND ISHIZUKA, 2021. MELT INCLUSION DATA FROM THE MARIANAS AND IZU VOLCANIC ARCS, AND MARIANA TROUGH BACK-ARC BASIN. EARTHCHEM LIBRARY.	D46-1-2	IBM	17.205	145.583	OLIVINE	90.0922	2125.45	47.55	0.969	17.409	6.477	13.501	8.28	0.739	2.692	0.184	69.7067
RASMUSSEN ET AL. (2022)	HAURI, PLANK, FISCHER, TAMURA AND ISHIZUKA, 2021. MELT INCLUSION DATA FROM THE MARIANAS AND IZU VOLCANIC ARCS, AND MARIANA TROUGH BACK-ARC BASIN. EARTHCHEM LIBRARY.	664-R26 Izx	IBM	28.5581	140.203	OLIVINE	90.0215	2189.72	47.4102	0.5687	13.8068	7.1943	16.9001	7.1278	0.4422	1.6536	0.1396	64.0722
RASMUSSEN ET AL. (2022)	HAURI, PLANK, FISCHER, TAMURA AND ISHIZUKA, 2021. MELT INCLUSION DATA FROM THE MARIANAS AND IZU VOLCANIC ARCS, AND MARIANA TROUGH BACK-ARC BASIN. EARTHCHEM LIBRARY.	664-R26 Izx	IBM	28.5581	140.203	OLIVINE	90.0215	2300.75	47.4967	0.6471	15.7801	7.0295	15.1782	6.6622	0.5284	1.8261	0.143	63.0444
RASMUSSEN ET AL. (2022)	HAURI, PLANK, FISCHER, TAMURA AND ISHIZUKA, 2021. MELT INCLUSION DATA FROM THE MARIANAS AND IZU VOLCANIC ARCS, AND MARIANA TROUGH BACK-ARC BASIN. EARTHCHEM LIBRARY.	668-R02 Izx	IBM	28.6361	140.58	OLIVINE	86.5783	2428.49	50.0029	0.6809	17.8388	6.904	11.3207	5.6893	0.3525	2.4789	0.1283	59.7311
RASMUSSEN ET AL. (2022)	HAURI, PLANK, FISCHER, TAMURA AND ISHIZUKA, 2021. MELT INCLUSION DATA FROM THE MARIANAS AND IZU VOLCANIC ARCS, AND MARIANA TROUGH BACK-ARC BASIN. EARTHCHEM LIBRARY.	666-R24 Izx	IBM	28.5814	140.481	OLIVINE	88.2716	2440.14	48.8412	0.8617	17.3874	6.8851	12.8134	5.9571	0.3598	2.4063	0.5506	60.8976
RASMUSSEN ET AL. (2022)	HAURI, PLANK, FISCHER, TAMURA AND ISHIZUKA, 2021. MELT INCLUSION DATA FROM THE MARIANAS AND IZU VOLCANIC ARCS, AND MARIANA TROUGH BACK-ARC BASIN. EARTHCHEM LIBRARY.	668-R02 Izx	IBM	28.6361	140.58	OLIVINE	88.3905	3196.17	48.8883	0.6558	17.3555	6.4067	15.5613	5.2506	0.2729	2.0869	0.0914	59.599
RASMUSSEN ET AL. (2022)	HAURI, PLANK, FISCHER, TAMURA AND ISHIZUKA, 2021. MELT INCLUSION DATA FROM THE MARIANAS AND IZU VOLCANIC ARCS, AND MARIANA TROUGH BACK-ARC BASIN. EARTHCHEM LIBRARY.	D48-4-1	IBM	17.275	145.623	OLIVINE	89.2841	3404.76	47.32	0.796	15.39	8.161	13.261	7.939	0.616	1.683	0.165	63.65
RASMUSSEN ET AL. (2022)	PORTNYAGIN, M., HOERNLE, K., PLECHOV, P., MIRONOV, N. AND KHUBUNAYA, S., 2007. CONSTRAINTS ON MANTLE MELTING AND COMPOSITION AND NATURE OF SLAB COMPONENTS IN VOLCANIC ARCS FROM VOLATILES (H2O, S, CL, F) AND TRACE ELEMENTS IN MELT INCLUSIONS FROM THE KAMCHATKA ARC. EARTH AND PLANETARY SCIENCE LETTERS, 255(1-2), PP.53-69.	KHUB-2	KAMCHATKA	56.05	160.63	OLIVINE	87.47	900	51.12	0.98	16.23	7.41	9.83	8.23	0.62	2.99	0.13	66.6577
RASMUSSEN ET AL. (2022)	PORTNYAGIN, M., HOERNLE, K., PLECHOV, P., MIRONOV, N. AND KHUBUNAYA, S., 2007. CONSTRAINTS ON MANTLE MELTING AND COMPOSITION AND NATURE OF SLAB COMPONENTS IN VOLCANIC ARCS FROM VOLATILES (H2O, S, CL, F) AND TRACE ELEMENTS IN MELT INCLUSIONS FROM THE KAMCHATKA ARC. EARTH AND PLANETARY SCIENCE LETTERS, 255(1-2), PP.53-69.	KHUB-5	KAMCHATKA	56.05	160.63	OLIVINE	87.87	900	51.33	0.96	15.17	6.63	9.83	8.59	0.73	3.12	0.2	69.9891
RASMUSSEN ET AL. (2022)	PORTNYAGIN, M., HOERNLE, K., PLECHOV, P., MIRONOV, N. AND KHUBUNAYA, S., 2007. CONSTRAINTS ON MANTLE MELTING AND COMPOSITION AND NATURE OF SLAB COMPONENTS IN VOLCANIC ARCS FROM VOLATILES (H2O, S, CL, F) AND TRACE ELEMENTS IN MELT INCLUSIONS FROM THE KAMCHATKA ARC. EARTH AND PLANETARY SCIENCE LETTERS, 255(1-2), PP.53-69.	KHUB-5	KAMCHATKA	56.05	160.63	OLIVINE	87.46	900	51.37	1.01	15.22	7.24	10.29	7.98	0.71	3.13	0.16	66.4877
RASMUSSEN ET AL. (2022)	PORTNYAGIN, M., HOERNLE, K., PLECHOV, P., MIRONOV, N. AND KHUBUNAYA, S., 2007. CONSTRAINTS ON MANTLE MELTING AND COMPOSITION AND NATURE OF SLAB COMPONENTS IN VOLCANIC ARCS FROM VOLATILES (H2O, S, CL, F) AND TRACE ELEMENTS IN MELT INCLUSIONS FROM THE KAMCHATKA ARC. EARTH AND PLANETARY SCIENCE LETTERS, 255(1-2), PP.53-69.	AP1	KAMCHATKA	56.05	160.63	OLIVINE	89.79	1500	50.22	0.92	15.85	5.51	13.22	6.2	0.7	2.74	0.16	66.9466
RASMUSSEN ET AL. (2022)	PORTNYAGIN, M., HOERNLE, K., PLECHOV, P., MIRONOV, N. AND KHUBUNAYA, S., 2007. CONSTRAINTS ON MANTLE MELTING AND COMPOSITION AND NATURE OF SLAB COMPONENTS IN VOLCANIC ARCS FROM VOLATILES (H2O, S, CL, F) AND TRACE ELEMENTS IN MELT INCLUSIONS FROM THE KAMCHATKA ARC. EARTH AND PLANETARY SCIENCE LETTERS, 255(1-2), PP.53-69.	KHUB-2	KAMCHATKA	56.05	160.63	OLIVINE	90.06	1500	48.87	0.86	15.22	6.93	13	9.69	0.43	2.49	0.13	71.5657
RASMUSSEN ET AL. (2022)	PORTNYAGIN, M., HOERNLE, K., PLECHOV, P., MIRONOV, N. AND KHUBUNAYA, S., 2007. CONSTRAINTS ON MANTLE MELTING AND COMPOSITION AND NATURE OF SLAB COMPONENTS IN VOLCANIC ARCS FROM VOLATILES (H2O, S, CL, F) AND TRACE ELEMENTS IN MELT INCLUSIONS FROM THE KAMCHATKA ARC. EARTH AND PLANETARY SCIENCE LETTERS, 255(1-2), PP.53-69.	KHUB-2	KAMCHATKA	56.05	160.63	OLIVINE	90.61	1500	49.39	0.84	15.57	5.79	13.5	9.34	0.44	2.56	0.11	74.3828
RASMUSSEN ET AL. (2022)	PORTNYAGIN, M., HOERNLE, K., PLECHOV, P., MIRONOV, N. AND KHUBUNAYA, S., 2007. CONSTRAINTS ON MANTLE MELTING AND COMPOSITION AND NATURE OF SLAB COMPONENTS IN VOLCANIC ARCS FROM VOLATILES (H2O, S, CL, F) AND TRACE ELEMENTS IN MELT INCLUSIONS FROM THE KAMCHATKA ARC. EARTH AND PLANETARY SCIENCE LETTERS, 255(1-2), PP.53-69.	KHUB-5	KAMCHATKA	56.05	160.63	OLIVINE	88.87	1500	48.95	1.08	16.53	6.92	11.65	8.1	0.63	3.02	0.13	67.814
RASMUSSEN ET AL. (2022)	PORTNYAGIN, M., HOERNLE, K., PLECHOV, P., MIRONOV, N. AND KHUBUNAYA, S., 2007. CONSTRAINTS ON MANTLE MELTING AND COMPOSITION AND NATURE OF SLAB COMPONENTS IN VOLCANIC ARCS FROM VOLATILES (H2O, S, CL, F) AND TRACE ELEMENTS IN MELT INCLUSIONS FROM THE KAMCHATKA ARC. EARTH AND PLANETARY SCIENCE LETTERS, 255(1-2), PP.53-69.	AP1	KAMCHATKA	56.05	160.63	OLIVINE	87.13	1600	48.81	0.96	16.55	7.18	10.95	6.77	0.74	2.88	0.17	62.9247
RASMUSSEN ET AL. (2022)	PORTNYAGIN, M., HOERNLE, K., PLECHOV, P., MIRONOV, N. AND KHUBUNAYA, S., 2007. CONSTRAINTS ON MANTLE MELTING AND COMPOSITION AND NATURE OF SLAB COMPONENTS IN VOLCANIC ARCS FROM VOLATILES (H2O, S, CL, F) AND TRACE ELEMENTS IN MELT INCLUSIONS FROM THE KAMCHATKA ARC. EARTH AND PLANETARY SCIENCE LETTERS, 255(1-2), PP.53-69.	KHUB-5	KAMCHATKA	56.05	160.63	OLIVINE	89.32	1600	49.86	0.84	15.31	7.17	12.9	9.31	0.42	2.65	0.14	70.0351
RASMUSSEN ET AL. (2022)	PORTNYAGIN, M., HOERNLE, K., PLECHOV, P., MIRONOV, N. AND KHUBUNAYA, S., 2007. CONSTRAINTS ON MANTLE MELTING AND COMPOSITION AND NATURE OF SLAB COMPONENTS IN VOLCANIC ARCS FROM VOLATILES (H2O, S, CL, F) AND TRACE ELEMENTS IN MELT INCLUSIONS FROM THE KAMCHATKA ARC. EARTH AND PLANETARY SCIENCE LETTERS, 255(1-2), PP.53-69.	AP1	KAMCHATKA	56.05	160.63	OLIVINE	90.12	1700	48.28	0.8	14.04	6.64	12.34	10.66	0.47	2.33	0.12	74.2915
RASMUSSEN ET AL. (2022)	PORTNYAGIN, M., HOERNLE, K., PLECHOV, P., MIRONOV, N. AND KHUBUNAYA, S., 2007. CONSTRAINTS ON MANTLE MELTING AND COMPOSITION AND NATURE OF SLAB COMPONENTS IN VOLCANIC ARCS FROM VOLATILES (H2O, S, CL, F) AND TRACE ELEMENTS IN MELT INCLUSIONS FROM THE KAMCHATKA ARC. EARTH AND PLANETARY SCIENCE LETTERS, 255(1-2), PP.53-69.	KHUB-5	KAMCHATKA	56.05	160.63	OLIVINE	88.26	1700	49.38	0.87	15.65	7.57	12.21	8.3	0.44	2.65	0.08	66.3705
RASMUSSEN ET AL. (2022)	PORTNYAGIN, M., HOERNLE, K., PLECHOV, P., MIRONOV, N. AND KHUBUNAYA, S., 2007. CONSTRAINTS ON MANTLE MELTING AND COMPOSITION AND NATURE OF SLAB COMPONENTS IN VOLCANIC ARCS FROM VOLATILES (H2O, S, CL, F) AND TRACE ELEMENTS IN MELT INCLUSIONS FROM THE KAMCHATKA ARC. EARTH AND PLANETARY SCIENCE LETTERS, 255(1-2), PP.53-69.	K1-30	KAMCHATKA	55.82	160.37	OLIVINE	90.81	1800	48.05	0.76	11.21	7.76	12.21	13.15	0.67	1.74	0.18	75.3102
RASMUSSEN ET AL. (2022)	PORTNYAGIN, M., HOERNLE, K., PLECHOV, P., MIRONOV, N. AND KHUBUNAYA, S., 2007. CONSTRAINTS ON MANTLE MELTING AND COMPOSITION AND NATURE OF SLAB COMPONENTS IN VOLCANIC ARCS FROM VOLATILES (H2O, S, CL, F) AND TRACE ELEMENTS IN MELT INCLUSIONS FROM THE KAMCHATKA ARC. EARTH AND PLANETARY SCIENCE LETTERS, 255(1-2), PP.53-69.	KHUB-2	KAMCHATKA	56.05	160.63	OLIVINE	88.83	1900	49.82	0.98	14.94	6.67	12.54	8.67	0.6	2.99	0.15	70.0575
RASMUSSEN ET AL. (2022)	PORTNYAGIN, M., HOERNLE, K., PLECHOV, P., MIRONOV, N. AND KHUBUNAYA, S., 2007. CONSTRAINTS ON MANTLE MELTING AND COMPOSITION AND NATURE OF SLAB COMPONENTS IN VOLCANIC ARCS FROM VOLATILES (H2O, S, CL, F) AND TRACE ELEMENTS IN MELT INCLUSIONS FROM THE KAMCHATKA ARC. EARTH AND PLANETARY SCIENCE LETTERS, 255(1-2), PP.53-69.	KHUB-2	KAMCHATKA	56.05	160.63	OLIVINE	89.64	1900	49.1	0.82	14.8	6.34	14.44	9.35	0.4	2.25	0.1	72.637
RASMUSSEN ET AL. (2022)	PORTNYAGIN, M., HOERNLE, K., PLECHOV, P., MIRONOV, N. AND KHUBUNAYA, S., 2007. CONSTRAINTS ON MANTLE MELTING AND COMPOSITION AND NATURE OF SLAB COMPONENTS IN VOLCANIC ARCS FROM VOLATILES (H2O, S, CL, F) AND TRACE ELEMENTS IN MELT INCLUSIONS FROM THE KAMCHATKA ARC. EARTH AND PLANETARY SCIENCE LETTERS, 255(1-2), PP.53-69.	KHUB-5	KAMCHATKA	56.05	160.63	OLIVINE	88.87	1900	49.5	0.84	14.47	6.81	12.23	9.59	0.49	2.54	0.16	71.7099
RASMUSSEN ET AL. (2022)	PORTNYAGIN, M., HOERNLE, K., PLECHOV, P., MIRONOV, N. AND KHUBUNAYA, S., 2007. CONSTRAINTS ON MANTLE MELTING AND COMPOSITION AND NATURE OF SLAB COMPONENTS IN VOLCANIC ARCS FROM VOLATILES (H2O, S, CL, F) AND TRACE ELEMENTS IN MELT INCLUSIONS FROM THE KAMCHATKA ARC. EARTH AND PLANETARY SCIENCE LETTERS, 255(1-2), PP.53-69.	KHUB-5	KAMCHATKA	56.05	160.63	OLIVINE	88.1	1900	48.81	0.95	15.91	7.66	11.77	7.85	0.49	2.79	0.16	64.8463
RASMUSSEN ET AL. (2022)	PORTNYAGIN, M., HOERNLE, K., PLECHOV, P., MIRONOV, N. AND KHUBUNAYA, S., 2007. CONSTRAINTS ON MANTLE MELTING AND COMPOSITION AND NATURE OF SLAB COMPONENTS IN VOLCANIC ARCS FROM VOLATILES (H2O, S, CL, F) AND TRACE ELEMENTS IN MELT INCLUSIONS FROM THE KAMCHATKA ARC. EARTH AND PLANETARY SCIENCE LETTERS, 255(1-2), PP.53-69.	PIKH	KAMCHATKA	56.01	160.1	OLIVINE	85.32	2000	50.03	1.08	17.13	7.15	10.83	7.1	0.97	3.35	0.2	64.1244
RASMUSSEN ET AL. (2022)	PORTNYAGIN, M., HOERNLE, K., PLECHOV, P., MIRONOV, N. AND KHUBUNAYA, S., 2007. CONSTRAINTS ON MANTLE MELTING AND COMPOSITION AND NATURE OF SLAB COMPONENTS IN VOLCANIC ARCS FROM VOLATILES (H2O, S, CL, F) AND TRACE ELEMENTS IN MELT INCLUSIONS FROM THE KAMCHATKA ARC. EARTH AND PLANETARY SCIENCE LETTERS, 255(1-2), PP.53-69.	PIKH	KAMCHATKA	56.01	160.1	OLIVINE	87.22	2000	50.22	0.81	16.27	6.96	11.78	7.61	0.82	3.03	0.19	66.3085
RASMUSSEN ET AL. (2022)	PORTNYAGIN, M., HOERNLE, K., PLECHOV, P., MIRONOV, N. AND KHUBUNAYA, S., 2007. CONSTRAINTS ON MANTLE MELTING AND COMPOSITION AND NATURE OF SLAB COMPONENTS IN VOLCANIC ARCS FROM VOLATILES (H2O, S, CL, F) AND TRACE ELEMENTS IN MELT INCLUSIONS FROM THE KAMCHATKA ARC. EARTH AND PLANETARY SCIENCE LETTERS, 255(1-2), PP.53-69.	KHUB-2	KAMCHATKA	56.05	160.63	OLIVINE	89.51	2000	49.48	0.8	14.17	6.89	12.81	9.92	0.41	2.33	0.07	72.1571
RASMUSSEN ET AL. (2022)	PORTNYAGIN, M., HOERNLE, K., PLECHOV, P., MIRONOV, N. AND KHUBUNAYA, S., 2007. CONSTRAINTS ON MANTLE MELTING AND COMPOSITION AND NATURE OF SLAB COMPONENTS IN VOLCANIC ARCS FROM VOLATILES (H2O, S, CL, F) AND TRACE ELEMENTS IN MELT INCLUSIONS FROM THE KAMCHATKA ARC. EARTH AND PLANETARY SCIENCE LETTERS, 255(1-2), PP.53-69.	K1-30	KAMCHATKA	55.82	160.37	OLIVINE	89.07	2000	45.91	0.75	11.42	9.16	11.86	12.56	0.64	1.84	0.17	71.166
RASMUSSEN ET AL. (2022)	PORTNYAGIN, M., HOERNLE, K., PLECHOV, P., MIRONOV, N. AND KHUBUNAYA, S., 2007. CONSTRAINTS ON MANTLE MELTING AND COMPOSITION AND NATURE OF SLAB COMPONENTS IN VOLCANIC ARCS FROM VOLATILES (H2O, S, CL, F) AND TRACE ELEMENTS IN MELT INCLUSIONS FROM THE KAMCHATKA ARC. EARTH AND PLANETARY SCIENCE LETTERS, 255(1-2), PP.53-69.	AP1	KAMCHATKA	56.05	160.63	OLIVINE	89.52	2100	47.51	0.69	12.66	7.6	12.17	12.41	0.5	1.99	0.14	74.6142
RASMUSSEN ET AL. (2022)	PORTNYAGIN, M., HOERNLE, K., PLECHOV, P., MIRONOV, N. AND KHUBUNAYA, S., 2007. CONSTRAINTS ON MANTLE MELTING AND COMPOSITION AND NATURE OF SLAB COMPONENTS IN VOLCANIC ARCS FROM VOLATILES (H2O, S, CL, F) AND TRACE ELEMENTS IN MELT INCLUSIONS FROM THE KAMCHATKA ARC. EARTH AND PLANETARY SCIENCE LETTERS, 255(1-2), PP.53-69.	PIKH	KAMCHATKA	56.01	160.1	OLIVINE	86.58	2100	49.29	1.12	17.6	7.18	11.49	7.35	1.1	3.34	0.23	64.8212
RASMUSSEN ET AL. (2022)	PORTNYAGIN, M., HOERNLE, K., PLECHOV, P., MIRONOV, N. AND KHUBUNAYA, S., 2007. CONSTRAINTS ON MANTLE MELTING AND COMPOSITION AND NATURE OF SLAB COMPONENTS IN VOLCANIC ARCS FROM VOLATILES (H2O, S, CL, F) AND TRACE ELEMENTS IN MELT INCLUSIONS FROM THE KAMCHATKA ARC. EARTH AND PLANETARY SCIENCE LETTERS, 255(1-2), PP.53-69.	K1-30	KAMCHATKA	55.82	160.37	OLIVINE	88	2100	46.18	0.9	12.74	9.19	11.47	10.74	0.64	2.13	0.16	67.7793
RASMUSSEN ET AL. (2022)	PORTNYAGIN, M., HOERNLE, K., PLECHOV, P., MIRONOV, N. AND KHUBUNAYA, S., 2007. CONSTRAINTS ON MANTLE MELTING AND COMPOSITION AND NATURE OF SLAB COMPONENTS IN VOLCANIC ARCS FROM VOLATILES (H2O, S, CL, F) AND TRACE ELEMENTS IN MELT INCLUSIONS FROM THE KAMCHATKA ARC. EARTH AND PLANETARY SCIENCE LETTERS, 255(1-2), PP.53-69.	PIKH	KAMCHATKA	56.01	160.1	OLIVINE	87.43	2200	48.96	1.12	16.92	6.87	11.71	7.13	1.03	3.22	0.17	65.134
RASMUSSEN ET AL. (2022)	PORTNYAGIN, M., HOERNLE, K., PLECHOV, P., MIRONOV, N. AND KHUBUNAYA, S., 2007. CONSTRAINTS ON MANTLE MELTING AND COMPOSITION AND NATURE OF SLAB COMPONENTS IN VOLCANIC ARCS FROM VOLATILES (H2O, S, CL, F) AND TRACE ELEMENTS IN MELT INCLUSIONS FROM THE KAMCHATKA ARC. EARTH AND PLANETARY SCIENCE LETTERS, 255(1-2), PP.53-69.	KHUB-2	KAMCHATKA	56.05	160.63	OLIVINE	89.2	2200	48.94	0.82	15.04	6.8	13.08	9.21	0.43	2.38	0.12	70.9128
RASMUSSEN ET AL. (2022)	PORTNYAGIN, M., HOERNLE, K., PLECHOV, P., MIRONOV, N. AND KHUBUNAYA, S., 2007. CONSTRAINTS ON MANTLE MELTING AND COMPOSITION AND NATURE OF SLAB COMPONENTS IN VOLCANIC ARCS FROM VOLATILES (H2O, S, CL, F) AND TRACE ELEMENTS IN MELT INCLUSIONS FROM THE KAMCHATKA ARC. EARTH AND PLANETARY SCIENCE LETTERS, 255(1-2), PP.53-69.	K1-30	KAMCHATKA	55.82	160.37	OLIVINE	88.2	2200	46.7	0.88	12.7	9.16	11.35	10.65	0.63	2.12	0.14	67.6668
RASMUSSEN ET AL. (2022)	PORTNYAGIN, M., HOERNLE, K., PLECHOV, P., MIRONOV, N. AND KHUBUNAYA, S., 2007. CONSTRAINTS ON MANTLE MELTING AND COMPOSITION AND NATURE OF SLAB COMPONENTS IN VOLCANIC ARCS FROM VOLATILES (H2O, S, CL, F) AND TRACE ELEMENTS IN MELT INCLUSIONS FROM THE KAMCHATKA ARC. EARTH AND PLANETARY SCIENCE LETTERS, 255(1-2), PP.53-69.	K1-30	KAMCHATKA	55.82	160.37	OLIVINE	88.93	2200	46.23	0.92	12.38	8.74	12.68	10.72	0.61	2.16	0.18	68.8258
RASMUSSEN ET AL. (2022)	PORTNYAGIN, M., HOERNLE, K., PLECHOV, P., MIRONOV, N. AND KHUBUNAYA, S., 2007. CONSTRAINTS ON MANTLE MELTING AND COMPOSITION AND NATURE OF SLAB COMPONENTS IN VOLCANIC ARCS FROM VOLATILES (H2O, S, CL, F) AND TRACE ELEMENTS IN MELT INCLUSIONS FROM THE KAMCHATKA ARC. EARTH AND PLANETARY SCIENCE LETTERS, 255(1-2), PP.53-69.	K1-30	KAMCHATKA	55.82	160.37	OLIVINE	89.32	2400	47.93	0.82	12.29	8.27	13.5	9.71	0.7	2.02	0.18	67.881
RASMUSSEN ET AL. (2022)	PORTNYAGIN, M., HOERNLE, K., PLECHOV, P., MIRONOV, N. AND KHUBUNAYA, S., 2007. CONSTRAINTS ON MANTLE MELTING AND COMPOSITION AND NATURE OF SLAB COMPONENTS IN VOLCANIC ARCS FROM VOLATILES (H2O, S, CL, F) AND TRACE ELEMENTS IN MELT INCLUSIONS FROM THE KAMCHATKA ARC. EARTH AND PLANETARY SCIENCE LETTERS, 255(1-2), PP.53-69.	K1-30	KAMCHATKA	55.82	160.37	OLIVINE	89.25	2400	46.23	0.79	11.77	8.89	12.17	12.46	0.6	1.87	0.17	71.6138
RASMUSSEN ET AL. (2022)	AUER, S., BINDEMAN, I., WALLACE, P., PONOMAREVA, V. AND PORTNYAGIN, M., 2009. THE ORIGIN OF HYDROUS, HIGH-DELTA18O VOLUMINOUS VOLCANISM: DIVERSE OXYGEN ISOTOPE VALUES AND HIGH MAGMATIC WATER CONTENTS WITHIN THE VOLCANIC RECORD OF KLYUCHEVSKOY VOLCANO, KAMCHATKA, RUSSIA. CONTRIBUTIONS TO MINERALOGY AND PETROLOGY, 157(2), P.209.	KLV 5/8	KAMCHATKA	56.0853	160.481	OLIVINE	88	2500	48.5134	0.799227	14.6073	7.63126	12.6136	8.11607	0.404613	2.52257	0.113411	65.6871
RASMUSSEN ET AL. (2022)	PORTNYAGIN, M., HOERNLE, K., PLECHOV, P., MIRONOV, N. AND KHUBUNAYA, S., 2007. CONSTRAINTS ON MANTLE MELTING AND COMPOSITION AND NATURE OF SLAB COMPONENTS IN VOLCANIC ARCS FROM VOLATILES (H2O, S, CL, F) AND TRACE ELEMENTS IN MELT INCLUSIONS FROM THE KAMCHATKA ARC. EARTH AND PLANETARY SCIENCE LETTERS, 255(1-2), PP.53-69.	PIKH	KAMCHATKA	56.01	160.1	OLIVINE	87.17	2500	50.02	1.04	17.21	6.22	10.54	6.49	1.19	3.7	0.19	65.2553
RASMUSSEN ET AL. (2022)	PORTNYAGIN, M., HOERNLE, K., PLECHOV, P., MIRONOV, N. AND KHUBUNAYA, S., 2007. CONSTRAINTS ON MANTLE MELTING AND COMPOSITION AND NATURE OF SLAB COMPONENTS IN VOLCANIC ARCS FROM VOLATILES (H2O, S, CL, F) AND TRACE ELEMENTS IN MELT INCLUSIONS FROM THE KAMCHATKA ARC. EARTH AND PLANETARY SCIENCE LETTERS, 255(1-2), PP.53-69.	KHUB-2	KAMCHATKA	56.05	160.63	OLIVINE	89.51	2500	47.03	0.92	16.52	6.8	13.44	8.82	0.55	2.57	0.14	70.0123
RASMUSSEN ET AL. (2022)	PORTNYAGIN, M., HOERNLE, K., PLECHOV, P., MIRONOV, N. AND KHUBUNAYA, S., 2007. CONSTRAINTS ON MANTLE MELTING AND COMPOSITION AND NATURE OF SLAB COMPONENTS IN VOLCANIC ARCS FROM VOLATILES (H2O, S, CL, F) AND TRACE ELEMENTS IN MELT INCLUSIONS FROM THE KAMCHATKA ARC. EARTH AND PLANETARY SCIENCE LETTERS, 255(1-2), PP.53-69.	K1-30	KAMCHATKA	55.82	160.37	OLIVINE	89.43	2500	46.66	1	13.72	8.15	12.95	9.26	0.69	2.4	0.19	67.1609
RASMUSSEN ET AL. (2022)	PORTNYAGIN, M., HOERNLE, K., PLECHOV, P., MIRONOV, N. AND KHUBUNAYA, S., 2007. CONSTRAINTS ON MANTLE MELTING AND COMPOSITION AND NATURE OF SLAB COMPONENTS IN VOLCANIC ARCS FROM VOLATILES (H2O, S, CL, F) AND TRACE ELEMENTS IN MELT INCLUSIONS FROM THE KAMCHATKA ARC. EARTH AND PLANETARY SCIENCE LETTERS, 255(1-2), PP.53-69.	K1-30	KAMCHATKA	55.82	160.37	OLIVINE	88.89	2600	46.87	1.15	14.38	8.73	13.04	9.26	0.74	2.36	0.2	65.6272
RASMUSSEN ET AL. (2022)	PORTNYAGIN, M., HOERNLE, K., PLECHOV, P., MIRONOV, N. AND KHUBUNAYA, S., 2007. CONSTRAINTS ON MANTLE MELTING AND COMPOSITION AND NATURE OF SLAB COMPONENTS IN VOLCANIC ARCS FROM VOLATILES (H2O, S, CL, F) AND TRACE ELEMENTS IN MELT INCLUSIONS FROM THE KAMCHATKA ARC. EARTH AND PLANETARY SCIENCE LETTERS, 255(1-2), PP.53-69.	PIKH	KAMCHATKA	56.01	160.1	OLIVINE	88	2700	49.77	1.18	17.67	6.28	10.37	8.47	1.31	3.56	0.23	70.826
RASMUSSEN ET AL. (2022)	PORTNYAGIN, M., HOERNLE, K., PLECHOV, P., MIRONOV, N. AND KHUBUNAYA, S., 2007. CONSTRAINTS ON MANTLE MELTING AND COMPOSITION AND NATURE OF SLAB COMPONENTS IN VOLCANIC ARCS FROM VOLATILES (H2O, S, CL, F) AND TRACE ELEMENTS IN MELT INCLUSIONS FROM THE KAMCHATKA ARC. EARTH AND PLANETARY SCIENCE LETTERS, 255(1-2), PP.53-69.	K1-30	KAMCHATKA	55.82	160.37	OLIVINE	89.09	2700	46.31	0.96	13.7	8.36	13.75	9.67	0.76	2.27	0.19	67.5541
RASMUSSEN ET AL. (2022)	PORTNYAGIN, M., HOERNLE, K., PLECHOV, P., MIRONOV, N. AND KHUBUNAYA, S., 2007. CONSTRAINTS ON MANTLE MELTING AND COMPOSITION AND NATURE OF SLAB COMPONENTS IN VOLCANIC ARCS FROM VOLATILES (H2O, S, CL, F) AND TRACE ELEMENTS IN MELT INCLUSIONS FROM THE KAMCHATKA ARC. EARTH AND PLANETARY SCIENCE LETTERS, 255(1-2), PP.53-69.	200338/1	KAMCHATKA	53.93	158.07	OLIVINE	87.65	2800	46	1.21	18.52	8.34	13.1	7.9	0.55	2.9		63.0319
RASMUSSEN ET AL. (2022)	AUER, S., BINDEMAN, I., WALLACE, P., PONOMAREVA, V. AND PORTNYAGIN, M., 2009. THE ORIGIN OF HYDROUS, HIGH-DELTA18O VOLUMINOUS VOLCANISM: DIVERSE OXYGEN ISOTOPE VALUES AND HIGH MAGMATIC WATER CONTENTS WITHIN THE VOLCANIC RECORD OF KLYUCHEVSKOY VOLCANO, KAMCHATKA, RUSSIA. CONTRIBUTIONS TO MINERALOGY AND PETROLOGY, 157(2), P.209.	KLV 5/18A	KAMCHATKA	56.0853	160.481	OLIVINE	86.4	3000	51.1511	0.888402	16.7393	5.75866	11.8851	5.11728	0.997084	3.01811	0.23784	61.5314
RASMUSSEN ET AL. (2022)	PORTNYAGIN, M., HOERNLE, K., PLECHOV, P., MIRONOV, N. AND KHUBUNAYA, S., 2007. CONSTRAINTS ON MANTLE MELTING AND COMPOSITION AND NATURE OF SLAB COMPONENTS IN VOLCANIC ARCS FROM VOLATILES (H2O, S, CL, F) AND TRACE ELEMENTS IN MELT INCLUSIONS FROM THE KAMCHATKA ARC. EARTH AND PLANETARY SCIENCE LETTERS, 255(1-2), PP.53-69.	200338/1	KAMCHATKA	53.93	158.07	OLIVINE	88.63	3100	46.57	1.17	17.22	7.67	11.93	8.19	0.52	2.74		65.7773
RASMUSSEN ET AL. (2022)	PORTNYAGIN, M., HOERNLE, K., PLECHOV, P., MIRONOV, N. AND KHUBUNAYA, S., 2007. CONSTRAINTS ON MANTLE MELTING AND COMPOSITION AND NATURE OF SLAB COMPONENTS IN VOLCANIC ARCS FROM VOLATILES (H2O, S, CL, F) AND TRACE ELEMENTS IN MELT INCLUSIONS FROM THE KAMCHATKA ARC. EARTH AND PLANETARY SCIENCE LETTERS, 255(1-2), PP.53-69.	200338/1	KAMCHATKA	53.93	158.07	OLIVINE	89.22	3200	44.23	1.11	18.44	7.71	13.46	7.45	0.62	2.72		63.4943
RASMUSSEN ET AL. (2022)	PORTNYAGIN, M., HOERNLE, K., PLECHOV, P., MIRONOV, N. AND KHUBUNAYA, S., 2007. CONSTRAINTS ON MANTLE MELTING AND COMPOSITION AND NATURE OF SLAB COMPONENTS IN VOLCANIC ARCS FROM VOLATILES (H2O, S, CL, F) AND TRACE ELEMENTS IN MELT INCLUSIONS FROM THE KAMCHATKA ARC. EARTH AND PLANETARY SCIENCE LETTERS, 255(1-2), PP.53-69.	K1-30	KAMCHATKA	55.82	160.37	OLIVINE	89.22	3400	46.47	0.92	13.62	8.15	12.49	9.32	0.57	2.63	0.14	67.3032
RASMUSSEN ET AL. (2022)	RIBEIRO, J.M., STERN, R.J., KELLEY, K.A., SHAW, A.M., MARTINEZ, F. AND OHARA, Y., 2015. COMPOSITION OF THE SLAB-DERIVED FLUIDS RELEASED BENEATH THE MARIANA FOREARC: EVIDENCE FOR SHALLOW DEHYDRATION OF THE SUBDUCTING PLATE. EARTH AND PLANETARY SCIENCE LETTERS, 418, PP.136-148.	6K-1096-R14	MARIANAS	12.1087	143.859	OLIVINE	93	130.43	52.34	0.34	10.11	6.21	17.43	8.77	0.04	0.6	0.02	71.7676
RASMUSSEN ET AL. (2022)	RIBEIRO, J.M., STERN, R.J., KELLEY, K.A., SHAW, A.M., MARTINEZ, F. AND OHARA, Y., 2015. COMPOSITION OF THE SLAB-DERIVED FLUIDS RELEASED BENEATH THE MARIANA FOREARC: EVIDENCE FOR SHALLOW DEHYDRATION OF THE SUBDUCTING PLATE. EARTH AND PLANETARY SCIENCE LETTERS, 418, PP.136-148.	YKDT88-R2	MARIANAS	12.4033	143.762	OLIVINE	91	749	51.19	0.39	15.25	5.79	16.35	6.55	0.04	1.01	0.01	67.0648
RASMUSSEN ET AL. (2022)	RIBEIRO, J.M., STERN, R.J., KELLEY, K.A., SHAW, A.M., MARTINEZ, F. AND OHARA, Y., 2015. COMPOSITION OF THE SLAB-DERIVED FLUIDS RELEASED BENEATH THE MARIANA FOREARC: EVIDENCE FOR SHALLOW DEHYDRATION OF THE SUBDUCTING PLATE. EARTH AND PLANETARY SCIENCE LETTERS, 418, PP.136-148.	TN273-30D-02-08	MARIANAS	12.463	143.805	OLIVINE	91	835.67	51.46	0.38	15.27	5.33	14.64	7.12	0.19	1.38	0.03	70.6271
RASMUSSEN ET AL. (2022)	RIBEIRO, J.M., STERN, R.J., KELLEY, K.A., SHAW, A.M., MARTINEZ, F. AND OHARA, Y., 2015. COMPOSITION OF THE SLAB-DERIVED FLUIDS RELEASED BENEATH THE MARIANA FOREARC: EVIDENCE FOR SHALLOW DEHYDRATION OF THE SUBDUCTING PLATE. EARTH AND PLANETARY SCIENCE LETTERS, 418, PP.136-148.	YKDT88-R2	MARIANAS	12.4033	143.762	OLIVINE	90	886.8	50.29	0.42	17.31	6.24	14.12	6.89	0.16	1.25	0.03	66.5272
RASMUSSEN ET AL. (2022)	RIBEIRO, J.M., STERN, R.J., KELLEY, K.A., SHAW, A.M., MARTINEZ, F. AND OHARA, Y., 2015. COMPOSITION OF THE SLAB-DERIVED FLUIDS RELEASED BENEATH THE MARIANA FOREARC: EVIDENCE FOR SHALLOW DEHYDRATION OF THE SUBDUCTING PLATE. EARTH AND PLANETARY SCIENCE LETTERS, 418, PP.136-148.	TN273-30D-02-08	MARIANAS	12.463	143.805	OLIVINE	91	925.927	50.99	0.36	15.13	5.37	15.04	7.29	0.2	1.33	0.03	70.9604
RASMUSSEN ET AL. (2022)	RIBEIRO, J.M., STERN, R.J., KELLEY, K.A., SHAW, A.M., MARTINEZ, F. AND OHARA, Y., 2015. COMPOSITION OF THE SLAB-DERIVED FLUIDS RELEASED BENEATH THE MARIANA FOREARC: EVIDENCE FOR SHALLOW DEHYDRATION OF THE SUBDUCTING PLATE. EARTH AND PLANETARY SCIENCE LETTERS, 418, PP.136-148.	YKDT88-R2	MARIANAS	12.4033	143.762	OLIVINE	89	1002.23	51.85	0.58	16.92	6.38	12.57	6.45	0.21	1.94	0.06	64.5359
RASMUSSEN ET AL. (2022)	BROUNCE, M.N., KELLEY, K.A. AND COTTRELL, E., 2014. VARIATIONS IN FE3+/? FE OF MARIANA ARC BASALTS AND MANTLE WEDGE F O2. JOURNAL OF PETROLOGY, 55(12), PP.2513-2536.	Ala03	MARIANAS	17.58	145.83	OLIVINE	87.074	1133.33	45.409	0.657667	19.5767	7.25567	14.5753	6.49067	0.469	1.72633	0.111333	61.689
RASMUSSEN ET AL. (2022)	BROUNCE, M.N., KELLEY, K.A. AND COTTRELL, E., 2014. VARIATIONS IN FE3+/? FE OF MARIANA ARC BASALTS AND MANTLE WEDGE F O2. JOURNAL OF PETROLOGY, 55(12), PP.2513-2536.	Ala03	MARIANAS	17.58	145.83	OLIVINE	86.5067	1156.67	46.0837	0.676667	18.8497	7.475	13.974	6.97467	0.471667	1.60867	0.106667	62.6799
RASMUSSEN ET AL. (2022)	JOHNSON, E.R., WALLACE, P.J., DELGADO GRANADOS, H., MANEA, V.C., KENT, A.J., BINDEMAN, I.N. AND DONEGAN, C.S., 2009. SUBDUCTION-RELATED VOLATILE RECYCLING AND MAGMA GENERATION BENEATH CENTRAL MEXICO: INSIGHTS FROM MELT INCLUSIONS, OXYGEN ISOTOPES AND GEODYNAMIC MODELS. JOURNAL OF PETROLOGY, 50(9), PP.1729-1764.	CLL-2	MEXICO	19.9	-100.7	OLIVINE	87.4	1000	51.31	0.69	16.57	7.14	10.4	6.27	0.69	2.74	0.09	61.2504
RASMUSSEN ET AL. (2022)	JOHNSON, E.R., WALLACE, P.J., DELGADO GRANADOS, H., MANEA, V.C., KENT, A.J., BINDEMAN, I.N. AND DONEGAN, C.S., 2009. SUBDUCTION-RELATED VOLATILE RECYCLING AND MAGMA GENERATION BENEATH CENTRAL MEXICO: INSIGHTS FROM MELT INCLUSIONS, OXYGEN ISOTOPES AND GEODYNAMIC MODELS. JOURNAL OF PETROLOGY, 50(9), PP.1729-1764.	CLL-3	MEXICO	19.9	-100.7	OLIVINE	90.2	1100	51.92	0.97	16.67	5.34	10.57	6.35	0.83	2.87	0.1	68.1574
RASMUSSEN ET AL. (2022)	JOHNSON, E.R., WALLACE, P.J., DELGADO GRANADOS, H., MANEA, V.C., KENT, A.J., BINDEMAN, I.N. AND DONEGAN, C.S., 2009. SUBDUCTION-RELATED VOLATILE RECYCLING AND MAGMA GENERATION BENEATH CENTRAL MEXICO: INSIGHTS FROM MELT INCLUSIONS, OXYGEN ISOTOPES AND GEODYNAMIC MODELS. JOURNAL OF PETROLOGY, 50(9), PP.1729-1764.	CLL-1_2	MEXICO	19.9	-100.7	OLIVINE	90.3	1100	52.29	0.68	17.22	5.2	10.98	5	0.89	3.22	0.08	63.3803
RASMUSSEN ET AL. (2022)	JOHNSON, E.R., WALLACE, P.J., DELGADO GRANADOS, H., MANEA, V.C., KENT, A.J., BINDEMAN, I.N. AND DONEGAN, C.S., 2009. SUBDUCTION-RELATED VOLATILE RECYCLING AND MAGMA GENERATION BENEATH CENTRAL MEXICO: INSIGHTS FROM MELT INCLUSIONS, OXYGEN ISOTOPES AND GEODYNAMIC MODELS. JOURNAL OF PETROLOGY, 50(9), PP.1729-1764.	CLL-1 5_2	MEXICO	19.9	-100.7	OLIVINE	86.1	1100	50.83	0.65	18.88	6.81	9.89	6.18	0.55	2.95	0.1	62.0274
RASMUSSEN ET AL. (2022)	JOHNSON, E.R., WALLACE, P.J., DELGADO GRANADOS, H., MANEA, V.C., KENT, A.J., BINDEMAN, I.N. AND DONEGAN, C.S., 2009. SUBDUCTION-RELATED VOLATILE RECYCLING AND MAGMA GENERATION BENEATH CENTRAL MEXICO: INSIGHTS FROM MELT INCLUSIONS, OXYGEN ISOTOPES AND GEODYNAMIC MODELS. JOURNAL OF PETROLOGY, 50(9), PP.1729-1764.	CSM-A_4	MEXICO	19.8	-102.02	OLIVINE	87.2	1200	51.82	0.95	17.7	6.52	9.08	5.49	0.64	4.02	0.2	60.2488
RASMUSSEN ET AL. (2022)	JOHNSON, E.R., WALLACE, P.J., DELGADO GRANADOS, H., MANEA, V.C., KENT, A.J., BINDEMAN, I.N. AND DONEGAN, C.S., 2009. SUBDUCTION-RELATED VOLATILE RECYCLING AND MAGMA GENERATION BENEATH CENTRAL MEXICO: INSIGHTS FROM MELT INCLUSIONS, OXYGEN ISOTOPES AND GEODYNAMIC MODELS. JOURNAL OF PETROLOGY, 50(9), PP.1729-1764.	J1D-12_1	MEXICO	18.97	-101.75	OLIVINE	90.3	1300	50.49	0.71	17.32	6.35	9.64	6.29	0.67	4.26	0.16	64.0675
RASMUSSEN ET AL. (2022)	JOHNSON, E.R., WALLACE, P.J., DELGADO GRANADOS, H., MANEA, V.C., KENT, A.J., BINDEMAN, I.N. AND DONEGAN, C.S., 2009. SUBDUCTION-RELATED VOLATILE RECYCLING AND MAGMA GENERATION BENEATH CENTRAL MEXICO: INSIGHTS FROM MELT INCLUSIONS, OXYGEN ISOTOPES AND GEODYNAMIC MODELS. JOURNAL OF PETROLOGY, 50(9), PP.1729-1764.	CEH-99	MEXICO	19.1	-102.38	OLIVINE	87.3	1500	53.12	0.94	18.44	6.02	8.08	6.3	0.66	4.12	0.19	65.3226
RASMUSSEN ET AL. (2022)	JOHNSON, E.R., WALLACE, P.J., DELGADO GRANADOS, H., MANEA, V.C., KENT, A.J., BINDEMAN, I.N. AND DONEGAN, C.S., 2009. SUBDUCTION-RELATED VOLATILE RECYCLING AND MAGMA GENERATION BENEATH CENTRAL MEXICO: INSIGHTS FROM MELT INCLUSIONS, OXYGEN ISOTOPES AND GEODYNAMIC MODELS. JOURNAL OF PETROLOGY, 50(9), PP.1729-1764.	CSM-A_2	MEXICO	19.8	-102.02	OLIVINE	88	1500	48.48	0.93	19.36	6.21	9.71	5.45	0.6	3.65	0.19	61.236
RASMUSSEN ET AL. (2022)	JOHNSON, E.R., WALLACE, P.J., DELGADO GRANADOS, H., MANEA, V.C., KENT, A.J., BINDEMAN, I.N. AND DONEGAN, C.S., 2009. SUBDUCTION-RELATED VOLATILE RECYCLING AND MAGMA GENERATION BENEATH CENTRAL MEXICO: INSIGHTS FROM MELT INCLUSIONS, OXYGEN ISOTOPES AND GEODYNAMIC MODELS. JOURNAL OF PETROLOGY, 50(9), PP.1729-1764.	J1D-13_1	MEXICO	18.97	-101.75	OLIVINE	88.4	1600	49.19	0.88	18.89	7.24	8.91	6.14	0.81	4.25	0.16	60.4199
RASMUSSEN ET AL. (2022)	JOHNSON, E.R., WALLACE, P.J., DELGADO GRANADOS, H., MANEA, V.C., KENT, A.J., BINDEMAN, I.N. AND DONEGAN, C.S., 2009. SUBDUCTION-RELATED VOLATILE RECYCLING AND MAGMA GENERATION BENEATH CENTRAL MEXICO: INSIGHTS FROM MELT INCLUSIONS, OXYGEN ISOTOPES AND GEODYNAMIC MODELS. JOURNAL OF PETROLOGY, 50(9), PP.1729-1764.	CA-A_14	MEXICO	19.33	-102.39	OLIVINE	88.6	1700	50.56	1.07	18.83	5.39	9.46	6.07	0.64	4.16	0.2	66.9649
RASMUSSEN ET AL. (2022)	JOHNSON, E.R., WALLACE, P.J., DELGADO GRANADOS, H., MANEA, V.C., KENT, A.J., BINDEMAN, I.N. AND DONEGAN, C.S., 2009. SUBDUCTION-RELATED VOLATILE RECYCLING AND MAGMA GENERATION BENEATH CENTRAL MEXICO: INSIGHTS FROM MELT INCLUSIONS, OXYGEN ISOTOPES AND GEODYNAMIC MODELS. JOURNAL OF PETROLOGY, 50(9), PP.1729-1764.	CLL-1 5_1	MEXICO	19.9	-100.7	OLIVINE	86.1	1700	51.19	0.68	18.79	6.61	9.77	6.03	0.54	3.23	0.1	62.1507
RASMUSSEN ET AL. (2022)	JOHNSON, E.R., WALLACE, P.J., DELGADO GRANADOS, H., MANEA, V.C., KENT, A.J., BINDEMAN, I.N. AND DONEGAN, C.S., 2009. SUBDUCTION-RELATED VOLATILE RECYCLING AND MAGMA GENERATION BENEATH CENTRAL MEXICO: INSIGHTS FROM MELT INCLUSIONS, OXYGEN ISOTOPES AND GEODYNAMIC MODELS. JOURNAL OF PETROLOGY, 50(9), PP.1729-1764.	P506-7	MEXICO	19.493	-102.251	OLIVINE	85.4	1700	50.78	0.93	17.99	6.81	7.72	5.7	0.77	4.22	0.23	60.1054
RASMUSSEN ET AL. (2022)	JOHNSON, E.R., WALLACE, P.J., DELGADO GRANADOS, H., MANEA, V.C., KENT, A.J., BINDEMAN, I.N. AND DONEGAN, C.S., 2009. SUBDUCTION-RELATED VOLATILE RECYCLING AND MAGMA GENERATION BENEATH CENTRAL MEXICO: INSIGHTS FROM MELT INCLUSIONS, OXYGEN ISOTOPES AND GEODYNAMIC MODELS. JOURNAL OF PETROLOGY, 50(9), PP.1729-1764.	CA-A_15	MEXICO	19.33	-102.39	OLIVINE	89.2	1900	50.24	0.89	19.24	5.37	9.6	5.54	0.66	3.96	0.15	64.998
RASMUSSEN ET AL. (2022)	JOHNSON, E.R., WALLACE, P.J., DELGADO GRANADOS, H., MANEA, V.C., KENT, A.J., BINDEMAN, I.N. AND DONEGAN, C.S., 2009. SUBDUCTION-RELATED VOLATILE RECYCLING AND MAGMA GENERATION BENEATH CENTRAL MEXICO: INSIGHTS FROM MELT INCLUSIONS, OXYGEN ISOTOPES AND GEODYNAMIC MODELS. JOURNAL OF PETROLOGY, 50(9), PP.1729-1764.	CA-A_12	MEXICO	19.33	-102.39	OLIVINE	89.4	2000	50.31	0.9	18.65	5.52	9.68	6.2	0.64	4.06	0.16	66.9065
RASMUSSEN ET AL. (2022)	JOHNSON, E.R., WALLACE, P.J., DELGADO GRANADOS, H., MANEA, V.C., KENT, A.J., BINDEMAN, I.N. AND DONEGAN, C.S., 2009. SUBDUCTION-RELATED VOLATILE RECYCLING AND MAGMA GENERATION BENEATH CENTRAL MEXICO: INSIGHTS FROM MELT INCLUSIONS, OXYGEN ISOTOPES AND GEODYNAMIC MODELS. JOURNAL OF PETROLOGY, 50(9), PP.1729-1764.	J1D-12_3	MEXICO	18.97	-101.75	OLIVINE	90.4	2000	50.82	0.8	18.07	5.68	9.5	5.15	0.77	4.31	0.16	62.0067
RASMUSSEN ET AL. (2022)	JOHNSON, E.R., WALLACE, P.J., DELGADO GRANADOS, H., MANEA, V.C., KENT, A.J., BINDEMAN, I.N. AND DONEGAN, C.S., 2009. SUBDUCTION-RELATED VOLATILE RECYCLING AND MAGMA GENERATION BENEATH CENTRAL MEXICO: INSIGHTS FROM MELT INCLUSIONS, OXYGEN ISOTOPES AND GEODYNAMIC MODELS. JOURNAL OF PETROLOGY, 50(9), PP.1729-1764.	J1D-17_1	MEXICO	18.97	-101.75	OLIVINE	90.1	2000	51.58	0.77	17.13	6.21	8.62	5.5	0.68	4.18	0.13	61.4525
RASMUSSEN ET AL. (2022)	JOHNSON, E.R., WALLACE, P.J., DELGADO GRANADOS, H., MANEA, V.C., KENT, A.J., BINDEMAN, I.N. AND DONEGAN, C.S., 2009. SUBDUCTION-RELATED VOLATILE RECYCLING AND MAGMA GENERATION BENEATH CENTRAL MEXICO: INSIGHTS FROM MELT INCLUSIONS, OXYGEN ISOTOPES AND GEODYNAMIC MODELS. JOURNAL OF PETROLOGY, 50(9), PP.1729-1764.	J1D-23	MEXICO	18.97	-101.75	OLIVINE	90.7	2000	48.9	0.78	17.88	5.75	9.34	5.86	0.69	4.17	0.2	64.7196
RASMUSSEN ET AL. (2022)	JOHNSON, E.R., WALLACE, P.J., DELGADO GRANADOS, H., MANEA, V.C., KENT, A.J., BINDEMAN, I.N. AND DONEGAN, C.S., 2009. SUBDUCTION-RELATED VOLATILE RECYCLING AND MAGMA GENERATION BENEATH CENTRAL MEXICO: INSIGHTS FROM MELT INCLUSIONS, OXYGEN ISOTOPES AND GEODYNAMIC MODELS. JOURNAL OF PETROLOGY, 50(9), PP.1729-1764.	CLL-1 6	MEXICO	19.9	-100.7	OLIVINE	86	2000	52.22	0.7	18.37	6.32	10	6.26	0.64	2.29	0.09	64.0664
RASMUSSEN ET AL. (2022)	JOHNSON, E.R., WALLACE, P.J., DELGADO GRANADOS, H., MANEA, V.C., KENT, A.J., BINDEMAN, I.N. AND DONEGAN, C.S., 2009. SUBDUCTION-RELATED VOLATILE RECYCLING AND MAGMA GENERATION BENEATH CENTRAL MEXICO: INSIGHTS FROM MELT INCLUSIONS, OXYGEN ISOTOPES AND GEODYNAMIC MODELS. JOURNAL OF PETROLOGY, 50(9), PP.1729-1764.	CSM-A 12	MEXICO	19.8	-102.02	OLIVINE	88.3	2000	49.81	1.07	18.95	6.02	9.88	5.45	0.53	3.77	0.22	61.9709
RASMUSSEN ET AL. (2022)	JOHNSON, E.R., WALLACE, P.J., DELGADO GRANADOS, H., MANEA, V.C., KENT, A.J., BINDEMAN, I.N. AND DONEGAN, C.S., 2009. SUBDUCTION-RELATED VOLATILE RECYCLING AND MAGMA GENERATION BENEATH CENTRAL MEXICO: INSIGHTS FROM MELT INCLUSIONS, OXYGEN ISOTOPES AND GEODYNAMIC MODELS. JOURNAL OF PETROLOGY, 50(9), PP.1729-1764.	J1D-20	MEXICO	18.97	-101.75	OLIVINE	90.5	2100	49.9	0.94	17.78	5.85	9.71	5.21	0.64	3.83	0.2	61.5839
RASMUSSEN ET AL. (2022)	JOHNSON, E.R., WALLACE, P.J., DELGADO GRANADOS, H., MANEA, V.C., KENT, A.J., BINDEMAN, I.N. AND DONEGAN, C.S., 2009. SUBDUCTION-RELATED VOLATILE RECYCLING AND MAGMA GENERATION BENEATH CENTRAL MEXICO: INSIGHTS FROM MELT INCLUSIONS, OXYGEN ISOTOPES AND GEODYNAMIC MODELS. JOURNAL OF PETROLOGY, 50(9), PP.1729-1764.	CSM-A_14	MEXICO	19.8	-102.02	OLIVINE	88.8	2100	49.32	1.03	18.91	6.65	10.58	5.66	0.55	3.8	0.16	60.506
RASMUSSEN ET AL. (2022)	JOHNSON, E.R., WALLACE, P.J., DELGADO GRANADOS, H., MANEA, V.C., KENT, A.J., BINDEMAN, I.N. AND DONEGAN, C.S., 2009. SUBDUCTION-RELATED VOLATILE RECYCLING AND MAGMA GENERATION BENEATH CENTRAL MEXICO: INSIGHTS FROM MELT INCLUSIONS, OXYGEN ISOTOPES AND GEODYNAMIC MODELS. JOURNAL OF PETROLOGY, 50(9), PP.1729-1764.	J1D-17_A	MEXICO	18.97	-101.75	OLIVINE	90.1	2300	49.53	0.77	18.17	6.16	9.29	5.21	0.7	4.33	0.14	60.3553
RASMUSSEN ET AL. (2022)	COOPER, L.B. (2009) VOLATILES IN TONGA ARC MAGMAS AND THEIR ROLE IN UNRAVELING SUBDUCTION ZONE PROCESSES. PH.D. DISSERTATION, BOSTON UNIVERSITY AND PLANK, T., ARCULUS, R. 2018. PETROLOGY SAMPLES FROM THE SUBMARINE TONGA ARC COLLECTED DURING THE TELVE AND NOTOVE CRUISES, VERSION 1.0. INTERDISCIPLINARY EARTH DATA ALLIANCE (IEDA). HTTPS://DOI.ORG/10.1594/IEDA/100743	LC-A-4	TONGA	-20.7408	-175.562	OLIVINE	88.7333	705	53.42	0.22	10.63	8.43	14.06	7.99	0.17	0.67	0.11	63.0458
RASMUSSEN ET AL. (2022)	COOPER, L.B. (2009) VOLATILES IN TONGA ARC MAGMAS AND THEIR ROLE IN UNRAVELING SUBDUCTION ZONE PROCESSES. PH.D. DISSERTATION, BOSTON UNIVERSITY AND PLANK, T., ARCULUS, R. 2018. PETROLOGY SAMPLES FROM THE SUBMARINE TONGA ARC COLLECTED DURING THE TELVE AND NOTOVE CRUISES, VERSION 1.0. INTERDISCIPLINARY EARTH DATA ALLIANCE (IEDA). HTTPS://DOI.ORG/10.1594/IEDA/100743	LC-A-4	TONGA	-20.7408	-175.562	OLIVINE	88.8839	757	52.84	0.28	10.12	8.22	13.64	8.34	0.17	0.74	0.05	64.6178
RASMUSSEN ET AL. (2022)	COOPER, L.B. (2009) VOLATILES IN TONGA ARC MAGMAS AND THEIR ROLE IN UNRAVELING SUBDUCTION ZONE PROCESSES. PH.D. DISSERTATION, BOSTON UNIVERSITY AND PLANK, T., ARCULUS, R. 2018. PETROLOGY SAMPLES FROM THE SUBMARINE TONGA ARC COLLECTED DURING THE TELVE AND NOTOVE CRUISES, VERSION 1.0. INTERDISCIPLINARY EARTH DATA ALLIANCE (IEDA). HTTPS://DOI.ORG/10.1594/IEDA/100743	LC-A-4	TONGA	-20.7408	-175.562	OLIVINE	92.0176	1037	52.9	0.38	13.06	7.08	13.91	7.06	0.25	1.11	0.12	64.2207
RASMUSSEN ET AL. (2022)	COOPER, L.B. (2009) VOLATILES IN TONGA ARC MAGMAS AND THEIR ROLE IN UNRAVELING SUBDUCTION ZONE PROCESSES. PH.D. DISSERTATION, BOSTON UNIVERSITY AND PLANK, T., ARCULUS, R. 2018. PETROLOGY SAMPLES FROM THE SUBMARINE TONGA ARC COLLECTED DURING THE TELVE AND NOTOVE CRUISES, VERSION 1.0. INTERDISCIPLINARY EARTH DATA ALLIANCE (IEDA). HTTPS://DOI.ORG/10.1594/IEDA/100743	LC-A-4	TONGA	-20.7408	-175.562	OLIVINE	89.0779	1282	52.48	0.22	10.28	8.19	13.6	8.64	0.17	0.78	0.05	65.5042
ZHAO ET AL. (2022)	ANDERSON (1974)	samp. 10	CASCADES	43.9606	-121.697	OLIVINE	87	971.731	49	1.73	18.1	8.5	11.1	7.6	0.27	3		61.4393
ZHAO ET AL. (2022)	ANDERSON (1974)	samp. 11	CASCADES	43.9606	-121.697	OLIVINE	85	891.266	48.4	0.96	18	8	12.4	7.2	0.16	2.6	0.11	61.5945
ZHAO ET AL. (2022)	ANDERSON (1974)	samp. 18	CASCADES	43.9606	-121.697	OLIVINE	88	949.668	51.2	0.69	18.2	5.2	10.9	5.4	0.4	3.2	0.15	64.9188
ZHAO ET AL. (2022)	ANDERSON (1974)	samp. 20	CASCADES	43.9606	-121.697	OLIVINE	90	1050.62	49.1	0.56	17.4	6.1	12.2	6.8	0.25	2.3		66.5158
ZHAO ET AL. (2022)	ANDERSON (1974)	samp. 22	CASCADES	43.9606	-121.697	OLIVINE	93	2500	54.5	0.85	15.1	4.5	12.1	6.7	0.27	1.9		72.6267
ZHAO ET AL. (2022)	ANDERSON (1974)	samp. 23	CASCADES	43.9606	-121.697	OLIVINE	91.8	2912.62	53.8	0.59	13.2	4.4	12.2	5	0.26	2.1		66.9421
ZHAO ET AL. (2022)	CERCANTES (2003)	samp. J1-8	MEXICO	19.3809	-99.5249	OLIVINE	88.2	1453.15	52.4	0.94	15.7	6.72	7.94	7.65	1.24	3.23	0.24	66.9815
ZHAO ET AL. (2022)	CERCANTES (2003)	samp. TE-6	MEXICO	19.3809	-99.5249	OLIVINE	87.8	1096.41	50.4	1.05	16.8	6.15	8.64	6.54	0.84	3.77	0.2	65.4577
ZHAO ET AL. (2022)	CERCANTES (2003)	samp. TUX-15	MEXICO	19.3809	-99.5249	OLIVINE	89.6	5887.57	45.4	1.14	14.1	7.21	10.78	9.35	1.7	3.18	0.54	69.7968
ZHAO ET AL. (2022)	CERCANTES (2003)	samp. TP-3	MEXICO	19.3809	-99.5249	OLIVINE	87.5	1608.65	51.8	1.73	17.1	5.74	8.55	5.86	1.13	4.08	0.45	64.5296
ZHAO ET AL. (2022)	CERCANTES (2003)	samp. TP-6	MEXICO	19.3809	-99.5249	OLIVINE	87.5	1717.27	52	1.76	16.6	5.81	8.75	6.19	0.96	4.03	0.4	65.4999
ZHAO ET AL. (2022)	DE HOOG (2001)	samp. GA21013	GULUNGGUNG	-7.25	108.06	OLIVINE	89.3	2716.17	44.3	1.18	16.82	7.25	18.53	7.85	0.53	3.3	0.12	65.8641
ZHAO ET AL. (2022)	DE HOOG (2001)	samp. GA21017	GULUNGGUNG	-7.25	108.06	OLIVINE	86.8	1252.27	46.4	1.12	18.27	7.56	16.09	7.16	0.38	2.7	0.12	62.7936
ZHAO ET AL. (2022)	DE HOOG (2001)	samp. GA22005/2	GULUNGGUNG	-7.25	108.06	OLIVINE	87.5	1194.85	46	1.15	17.92	7.72	16.26	7.76	0.36	2.6	0.12	64.1735
ZHAO ET AL. (2022)	DE HOOG (2001)	samp. GA27007	GULUNGGUNG	-7.25	108.06	OLIVINE	87.7	1395.56	46.4	1.08	17.28	8.07	15.79	8.4	0.35	2.4	0.14	64.9721
ZHAO ET AL. (2022)	GABORIEAU (2020)	samp. AO15-5	VANUATU	-15.5	168.097	OLIVINE	88.8688	487.466	50.4792	0.758	14.4315	6.95638	13.5925	6.62755	1.26306	2.4653	0.2258	62.9322
ZHAO ET AL. (2022)	GABORIEAU (2020)	samp. AO17-D4	VANUATU	-15.5	168.097	OLIVINE	90.3756	2372.76	45.1901	0.647045	10.835	8.91948	16.0628	8.00088	0.578071	2.1377	1.817	61.5158
ZHAO ET AL. (2022)	GABORIEAU (2020)	samp. AO17-D6	VANUATU	-15.5	168.097	OLIVINE	91.2709	1205.51	47.2088	0.947	12.863	7.50717	13.5857	7.45205	2.05971	3.12525	0.35265	63.8847
ZHAO ET AL. (2022)	MIRONIV (2018)	samp. NT	KAMCHATKA	55.5658	160.146	OLIVINE	88.5	2170.75	47.32	1.08	15.87	7.1	14.04	6.6	0.98	2.78	0.22	62.3565
ZHAO ET AL. (2022)	MIRONIV (2018)	samp. NT	KAMCHATKA	55.5658	160.146	OLIVINE	90.1	2391.71	46.9	1.1	15.91	6.41	14.6	6.77	0.91	2.82	0.21	65.3028
ZHAO ET AL. (2022)	MIRONIV (2018)	samp. NT	KAMCHATKA	55.5658	160.146	OLIVINE	88.9	1828.05	47.96	1.01	15.04	7.2	13.85	6.6	0.94	2.65	0.16	62.0276
ZHAO ET AL. (2022)	MIRONIV (2018)	samp. NT	KAMCHATKA	55.5658	160.146	OLIVINE	90	2552.42	47.18	1.09	16.22	6.45	14.56	5.83	0.86	2.76	0.2	61.6961
ZHAO ET AL. (2022)	MIRONIV (2018)	samp. NT	KAMCHATKA	55.5658	160.146	OLIVINE	88	1296.96	47.97	1.08	15.14	7.54	13.64	6.71	0.95	2.84	0.21	61.3277
ZHAO ET AL. (2022)	MIRONIV (2018)	samp. NT	KAMCHATKA	55.5658	160.146	OLIVINE	88.3	2119.32	46.87	1.08	15.92	7.47	13.65	6.49	1.03	2.75	0.24	60.7568
ZHAO ET AL. (2022)	MIRONIV (2018)	samp. NT	KAMCHATKA	55.5658	160.146	OLIVINE	87.9	1895.78	47.25	1.11	15.72	7.18	13.45	6.37	0.99	2.79	0.2	61.2547
ZHAO ET AL. (2022)	MIRONIV (2018)	samp. NT	KAMCHATKA	55.5658	160.146	OLIVINE	89	1974.52	46.98	1.12	15.71	6.91	13.77	6.41	0.94	2.81	0.19	62.3075
ZHAO ET AL. (2022)	MIRONIV (2018)	samp. NT	KAMCHATKA	55.5658	160.146	OLIVINE	88.9	2196.43	47.37	1.05	15.64	7.42	13.89	6.51	0.92	2.89	0.17	60.99
ZHAO ET AL. (2022)	MIRONIV (2018)	samp. NT	KAMCHATKA	55.5658	160.146	OLIVINE	87.5	2211.63	47.38	1.1	16.55	5.9	13.86	6.46	1.04	2.8	0.2	66.1147
ZHAO ET AL. (2022)	MIRONIV (2018)	samp. K01-30	KAMCHATKA	55.5658	160.146	OLIVINE	88.7	2457.63	46.84	0.87	13.49	8.53	13.38	9.63	0.78	2.34	0.17	66.7972
ZHAO ET AL. (2022)	MIRONIV (2018)	samp. K01-30	KAMCHATKA	55.5658	160.146	OLIVINE	87.6	1870.85	46.8	0.9	13.23	9.4	11.23	11.06	0.64	2.2	0.13	67.7074
ZHAO ET AL. (2022)	MIRONIV (2018)	samp. K01-30	KAMCHATKA	55.5658	160.146	OLIVINE	90.5	1690	49.78	0.81	11.31	8.12	11.78	13.51	0.65	1.73	0.13	74.7785
ZHAO ET AL. (2022)	MIRONIV (2018)	samp. K01-30	KAMCHATKA	55.5658	160.146	OLIVINE	87.9	2123.48	48.45	0.9	13.01	9.52	10.98	10.72	0.63	2.19	0.17	66.74
ZHAO ET AL. (2022)	MIRONIV (2018)	samp. K01-30	KAMCHATKA	55.5658	160.146	OLIVINE	87.1	2047.53	51.79	1.51	14.09	8.2	9.84	8.23	1.36	3.49	0.38	64.1386
ZHAO ET AL. (2022)	MIRONIV (2018)	samp. K01-30	KAMCHATKA	55.5658	160.146	OLIVINE	88.7	1990	46.58	0.87	11.54	9.31	11.61	13.04	0.64	1.88	0.13	71.3954
ZHAO ET AL. (2022)	MIRONIV (2018)	samp. K01-30	KAMCHATKA	55.5658	160.146	OLIVINE	88.5	1785.71	48.78	1.13	12.66	8.18	9.79	9.97	1.31	2.92	0.38	68.4736
ZHAO ET AL. (2022)	MIRONIV (2018)	samp. K01-30	KAMCHATKA	55.5658	160.146	OLIVINE	88.5	1766.41	49.11	1.32	12.63	8.24	11	10.07	1.31	2.61	0.61	68.5312
ZHAO ET AL. (2022)	MIRONIV (2018)	samp. K01-30	KAMCHATKA	55.5658	160.146	OLIVINE	89	1812.98	48.96	0.86	12.69	8.64	13.08	10.21	0.72	2.04	0.15	67.8022
ZHAO ET AL. (2022)	MIRONIV (2018)	samp. K01-30	KAMCHATKA	55.5658	160.146	OLIVINE	88.9	3114.91	47.33	0.94	13.92	8.25	12.17	9.5	0.61	2.71	0.12	67.2345
ZHAO ET AL. (2022)	MIRONIV (2018)	samp. K01-30	KAMCHATKA	55.5658	160.146	OLIVINE	88.6	2030.95	47.45	0.92	12.61	8.99	12.29	11.14	0.65	2.22	0.13	68.8295
ZHAO ET AL. (2022)	MIRONIV (2018)	samp. K01-30	KAMCHATKA	55.5658	160.146	OLIVINE	89.1	2542.53	47.6	0.96	13.86	8.37	12.69	9.55	0.7	2.38	0.19	67.0317
ZHAO ET AL. (2022)	MIRONIV (2018)	samp. K01-30	KAMCHATKA	55.5658	160.146	OLIVINE	88.9	2430	47.78	0.82	11.86	9	11.78	12.78	0.62	1.92	0.18	71.6749
ZHAO ET AL. (2022)	MIRONIV (2018)	samp. K01-30	KAMCHATKA	55.5658	160.146	OLIVINE	89.3	2858.54	49.24	0.9	12.28	8.43	12.98	10.66	0.68	2.2	0.12	69.2628
ZHAO ET AL. (2022)	MIRONIV (2018)	samp. K01-30	KAMCHATKA	55.5658	160.146	OLIVINE	89.9	1900	48.1	0.81	12.67	7.71	13.43	11.18	0.63	1.87	0.1	72.0983
ZHAO ET AL. (2022)	MIRONIV (2018)	samp. K01-30	KAMCHATKA	55.5658	160.146	OLIVINE	89.1	2281.69	48.13	1.09	14.81	8.14	13.38	8.99	1.02	2.47	0.25	66.3081
ZHAO ET AL. (2022)	MIRONIV (2018)	samp. K01-30	KAMCHATKA	55.5658	160.146	OLIVINE	90.4	2610	47.91	1.21	14.68	6.91	12.96	9.71	0.63	2.61	0.19	71.4618
ZHAO ET AL. (2022)	MIRONIV (2018)	samp. K01-30	KAMCHATKA	55.5658	160.146	OLIVINE	88.9	2077.67	46.73	0.81	12.72	9.02	12.91	11.28	0.67	2	0.16	69.0257
ZHAO ET AL. (2022)	MIRONIV (2018)	samp. K01-30	KAMCHATKA	55.5658	160.146	OLIVINE	88.9	2200.37	48.7	0.83	13.18	8.94	12.8	9.97	0.73	2.12	0.2	66.525
ZHAO ET AL. (2022)	MIRONIV (2018)	samp. K01-30	KAMCHATKA	55.5658	160.146	OLIVINE	89.4	2019.42	43.45	1.03	13.63	7.97	13.76	9.84	0.78	2.27	0.2	68.751
ZHAO ET AL. (2022)	MIRONIV (2018)	samp. K01-30	KAMCHATKA	55.5658	160.146	OLIVINE	90.3	1838.52	48.56	1.15	15.14	7.25	13.04	8.93	0.9	2.55	0.21	68.7004
ZHAO ET AL. (2022)	MIRONIV (2018)	samp. K01-30	KAMCHATKA	55.5658	160.146	OLIVINE	88.8	2231.64	48.62	0.94	13.09	9.25	13.16	10.58	0.67	2.04	0.13	67.0859
ZHAO ET AL. (2022)	MIRONIV (2018)	samp. K01-30	KAMCHATKA	55.5658	160.146	OLIVINE	88.6	2140.82	46.13	0.87	12.88	8.95	13.29	10.53	0.72	2.18	0.18	67.7063
ZHAO ET AL. (2022)	METRICH (1999)	samp. B45	LUZON	20.25	121.9	OLIVINE	89.3	2192.82	46.98	0.64	14.03	7.93	17.5	8.95	0.96	2.5	0.17	66.7907
ZHAO ET AL. (2022)	METRICH (2000)	samp. B45	LUZON	20.25	121.9	OLIVINE	89.3	2648.11	44.92	0.77	15.68	9.06	17.36	8.79	0.83	2.44	0.64	63.355
ZHAO ET AL. (2022)	METRICH (2001)	samp. B45	LUZON	20.25	121.9	OLIVINE	88.6	3036.05	44.33	0.73	16.74	7.3	18.07	8.18	0.91	2.72	0.37	66.6312
ZHAO ET AL. (2022)	METRICH (2002)	samp. B45	LUZON	20.25	121.9	OLIVINE	87.8	2818.43	45.44	0.65	15.6	9.14	16.4	9.09	0.87	2.29	0.14	63.9282
ZHAO ET AL. (2022)	METRICH (2003)	samp. B45	LUZON	20.25	121.9	OLIVINE	87.2	2081.82	44.96	0.69	16.88	8.17	16.62	8.02	0.99	2.53	0.23	63.6268
ZHAO ET AL. (2022)	METRICH (2004)	samp. B45	LUZON	20.25	121.9	OLIVINE	86.6	1576.54	48.1	0.7	16.55	7.83	15.29	7.84	1.18	2.68	0.17	64.0839
ZHAO ET AL. (2022)	METRICH (2005)	samp. B45	LUZON	20.25	121.9	OLIVINE	85.4	2192.9	46.9	0.77	16.99	8.23	15.42	8.13	1.04	2.5	0.2	63.7726
ZHAO ET AL. (2022)	METRICH (2006)	samp. B45	LUZON	20.25	121.9	OLIVINE	87.2	1669.78	49.09	0.67	16.09	7.58	13.44	8.02	1.12	2.62	0.18	65.3432
ZHAO ET AL. (2022)	METRICH (2007)	samp. B45	LUZON	20.25	121.9	OLIVINE	85.6	2192.9	47.06	0.82	17.84	7.91	14.17	7.73	1.21	2.8	0.2	63.5229
Note:
The sulfur data from Zhao et al. (2022) is corrected to primary basaltic rocks.
References:
Rasmussen, D. J., Plank, T. A., Cottrell, E., Johansson, A., Lehnert, K. A., Hauri, E. H., 2022. DCO-EarthChem Melt Inclusion Expert Dataset, Version 1.0. Interdisciplinary Earth Data Alliance (IEDA). https://doi.org/10.26022/IEDA/112364. Accessed 2023-08-09.
Zhao, S.-Y., Yang, A. Y., Langmuir, C. H. & Zhao, T.-P. Oxidized primary arc magmas: Constraints from Cu/Zr systematics in global arc volcanics. Sci. Adv. 8, eabk0718 (2022).
