# Supplementary material for: Latitude-dependent oxygen fugacity in arc magmas
Source: Nat Commun. 2024 Jul 18;15:6050. doi: 10.1038/s41467-024-50337-6 (PMC11258285; doi:10.1038/s41467-024-50337-6)
Supplement: Supplementary file 15 — Supplementary Data 12 [file 41467_2024_50337_MOESM15_ESM.xlsx]

## Sheet: Sheet1
Supplementary Table 12. Compiled data of d13C of volcanic arc gases.
Location	Average latitude (°)	std	Average d13C of volcanic gases (‰)	Median d13C of volcanic gases (‰)	std
Kuril-Kamchatka	47.4917	4.01504	-6.11667	-6.15	1.14004
Japan	35.6311	4.61169	-5.06842	-4.9	1.5794
Sunda	-7.6	0.243311	-4.2825	-4.1	0.572394
Lesser Antilles	15.3229	0.684395	-4.33647	-3.4	1.27469
Aleutians	56.7114	2.98845	-6.97459	-6.3	1.94207
Cascades	47.1038	1.43975	-8.56923	-8.6	1.95034
Central America	14.4119	1.3033	-4.37688	-4.15	1.52086
(Colombia NAVZ)	1.31368	0.800595	-6.93	-6.7	1.68716
(N Chile CAVZ)	-21.5372	1.92893	-6.32917	-6.925	1.98822
Andes S1	-37.8633	0.56389	-8.44	-7.96	1.02007
Kermadec	-37.5		-4.2
Papua New Guinea	-4.34		-2.6
The origional data are from Mason et al. (2017).
std: standard deviation.
References:
Mason, E., Edmonds, M. & Turchyn, A. V. Remobilization of crustal carbon may dominate volcanic arc emissions. Science 357, 290–294 (2017).
