# Supplementary material for: Latitude-dependent oxygen fugacity in arc magmas
Source: Nat Commun. 2024 Jul 18;15:6050. doi: 10.1038/s41467-024-50337-6 (PMC11258285; doi:10.1038/s41467-024-50337-6)
Supplement: Supplementary file 16 — Supplementary Data 13 [file 41467_2024_50337_MOESM16_ESM.xlsx]

## Sheet: Sheet1
Supplementary Table 13. Compiled data of particulate organic carbon (POC) flux at 2000m.
Latitude (°)	std	Average flux of POC at 2000m (mgC/m2/day)	std
73.7375	3.01612	0.753727	0.371274
67.5	2.82843	1.18784	0.36701
53.15	2.68488	1.69309	0.85818
45.6458	2.95561	2.22206	1.08342
34.0077	3.06987	1.34127	0.690462
24.7	3.06064	2.52394	2.28389
14.9118	2.42639	2.83358	1.99842
-4.15	1.93169	1.54533	0.958851
-14.3	4.96689	1.86235	1.18451
-24.65	5.25959	3.7535	1.18145
-46.8	0	1.64438	0.559485
-53.1625	2.7923	0.769019	0.462784
-63.2333	1.80693	0.473879	0.393745
-73.5	0	0.225288	0.0547474
The origional data are from Henson et al. (2012).
std: standard deviation.
References:
Henson, S. A., Sanders, R. & Madsen, E. Global patterns in efficiency of particulate organic carbon export and transfer to the deep ocean: export and transfer efficiency. Global Biogeochem. Cycles 26, GB1028 (2012).
