# Supplementary material for: Latitude-dependent oxygen fugacity in arc magmas
Source: Nat Commun. 2024 Jul 18;15:6050. doi: 10.1038/s41467-024-50337-6 (PMC11258285; doi:10.1038/s41467-024-50337-6)
Supplement: Supplementary file 17 — Supplementary Data 14 [file 41467_2024_50337_MOESM17_ESM.xlsx]

## Sheet: Sheet1
Supplementary Table 14. Compiled data of total carbon in subducted sediments and flux of subducted total carbon.
Location	Latitude (°)	Absolute value of Latitude (°)	Organic carbon percent (wt.%)	Inorganic carbon percent (wt.%)	Total carbon percent (wt.%)	Flux of subducted total carbon (Kt/yr/km)	Flux of organic carbon (Kt/yr/km)	Flux of inorganic carbon (Kt/yr/km)	Trench length (km)
Sumatra	-1	1	0.125	1.81	1.935	3.7	0.238889	3.46111	1800
Colombia-Ecuador	1	1	0.92	5.88	6.8	1.82	0.245455	1.57273	1100
Java	-8	8	0.125	1.81	1.935	2.04	0.133333	1.90952	2100
Philippine-Mindanao	8	8	0.03	3.6	3.63	1.3	0.01	1.29	1000
Solomons	-10	10	0.205	3.79	3.995	1.75	0.0909091	1.65455	2750
Costa Rica	10	10	0.42	3.05	3.47	1.53	0.177778	1.35556	450
Peru	-12	12	0.78	3.88	4.66	1.44	0.240909	1.2	2200
Nicaragua	12	12	0.42	3.05	3.47	1.13	0.145455	0.981818	275
Guatemala	14	14	0.56	4.97	5.53	3	0.3	2.7	500
Andaman-Burma	14	14	0.396	1.88	2.276	4.29	0.75	3.55	1800
Lesser Antilles	15	15	0.104	0.38	0.484	1.52	0.329412	1.18824	850
Mexico	16	16	0.78	0.46	1.24	0.24	0.147059	0.0882353	1700
Mariana	16	16	0.045	0.87	0.915	0.45	0.025	0.43125	1600
South Luzon	17	17	0.092	8.63	8.722	4.3	0.05	4.275	400
Tonga	22	22	0.1	0.28	0.38	0.23	0.06	0.166667	1500
Taiwan-North Luzon	22	22	0.688	1.6	2.288	1.06	0.314286	0.742857	700
North Chile	-25	25	0.78	3.88	4.66	1.64	0.275	1.365	2000
Ryukyu	25	25	0.1	0.07	0.17	0.02	0.01	0.01	1000
Makran	25	25	0.35	1.72	2.07	4.71	0.8	3.91	1000
Izu-Bonin	29	29	0.09	0.01	0.1	0.05	0.0461538	0.00769231	1300
Kermadec	-32	32	0.359	4.29	4.649	1.74	0.136	1.6	1250
SW Japan	33	33	0.418	0.61	1.028	1.11	0.455556	0.655556	900
Aegean	34	34	0.365	2.03	2.395	1.47	0.85	0.608333	1200
NE Japan	38	38	0.33	0.04	0.37	0.44	0.39	0.05	1000
Southern Chile	-45	45	0.172	0.18	0.352	0.33	0.165	0.165	2000
Kurile	46	46	0.26	0.09	0.35	0.18	0.136364	0.0454545	1100
Oregon-Washington	46	46	0.306	0.76	1.066	1.07	0.305882	0.764706	850
British Columbia	50	50	0.332	0.26	0.592	0.8	0.454545	0.345455	550
Aleutians	52	52	0.337	0.54	0.877	1.17	0.446667	0.72	1500
Kamchatka	53	53	0.21	1.27	1.48	1.4	0.2	1.2	1100
South Sandwich	-58	58	0.288	0.62	0.908	0.39	0.128571	0.257143	700
Alaska	58	58	0.401	0.24	0.641	1.35	0.839024	0.502439	2050
Average Latitude (°)	std	Organic carbon percent (wt.%)	std	Inorganic carbon percent (wt.%)	std	Flux of organic carbon (Kt/yr/km)	std	Flux of inorganic carbon (Kt/yr/km)	std
-51.5	9.19239	0.23	0.0820244	0.4	0.311127	0.146786	0.0257589	0.211071	0.0651548
-28.5	4.94975	0.5695	0.297692	4.085	0.289914	0.2055	0.0982878	1.4825	0.16617
-7.75	4.78714	0.30875	0.316422	2.8225	1.16971	0.17601	0.0757828	2.0563	0.981443
6.33333	4.72582	0.456667	0.446132	4.17667	1.50054	0.144411	0.121222	1.40609	0.147984
14.8571	1.67616	0.342429	0.275596	2.89143	3.01676	0.249561	0.248649	1.88779	1.62232
24.6	2.88097	0.2656	0.260397	0.736	0.850488	0.246088	0.332344	0.967443	1.67243
35	2.64575	0.371	0.0443058	0.893333	1.02481	0.565185	0.248825	0.437963	0.336814
47.3333	2.3094	0.299333	0.03646	0.37	0.348281	0.29893	0.159205	0.385205	0.36127
54.3333	3.21455	0.316	0.0972163	0.683333	0.529748	0.49523	0.322268	0.80748	0.356914
The origional data are from Clift (2017).
Refefences:
Clift, P. D. A revised budget for Cenozoic sedimentary carbon subduction: Cenozoic Carbon Subduction. Rev. Geophys. 55, 97–125 (2017).
