# Supplementary material for: Latitude-dependent oxygen fugacity in arc magmas
Source: Nat Commun. 2024 Jul 18;15:6050. doi: 10.1038/s41467-024-50337-6 (PMC11258285; doi:10.1038/s41467-024-50337-6)
Supplement: Supplementary file 18 — Supplementary Data 15 [file 41467_2024_50337_MOESM18_ESM.xlsx]

## Sheet: Sheet1
Supplementary Table 15. Compiled data of sulfur isotope of melt inclusions in volcanic rocks and harzburgite, magmatic sulfides in cumulate, and whole-rock samples from different arc segments.
Arc	Location	Latitude	Longitude	Average latitude	Sample type	Fo of olivine	Whole-rock SiO2 (wt%)	S (ppm)	δ34SV-CDT (‰)	Average δ34SV-CDT (‰)	Standard deviation	References
Ryukyu	Kyushu	33.27	131.4	32.6413	Fo-hosted MI	81.3		2934	5.18	5.264	1.16096	Kawaguchi et al. (2022)
Ryukyu	Kyushu	33.27	131.4		Fo-hosted MI	80.9		3487	4.73			Kawaguchi et al. (2022)
Ryukyu	Kyushu	33.1333	131.283		Fo-hosted MI	78.9		2952	6.34			Kawaguchi et al. (2022)
Ryukyu	Kyushu	31.7667	130.59		Fo-hosted MI	78.9		2694	6.42			Kawaguchi et al. (2022)
Ryukyu	Kyushu	31.7667	130.59		Fo-hosted MI	75.4		3439	3.65			Kawaguchi et al. (2022)
Central American	Feugo	14.28	-90.87	12.2633	Fo-hosted MI	80		3000	0.9	1.56667	0.650641	Taracsák et al. (2023)
Central American	Cerro Negro	12.56	-86.7		Fo-hosted MI	74		2700	2.2			Taracsák et al. (2023)
Central American	Turrialba	9.95	-83.68		Fo-hosted MI	83		3500	1.6			Taracsák et al. (2023)
Kamchatka	Tolbachik	55.87	160.31	55.87	Fo-hosted MI	86.4		2416	4.5	6.82	2.63936	Gurenko (2021)
Kamchatka	Tolbachik	55.87	160.31		Fo-hosted MI	84.8		2046	2.9			Gurenko (2021)
Kamchatka	Tolbachik	55.87	160.31		Fo-hosted MI	90.1		2036	3.3			Gurenko (2021)
Kamchatka	Tolbachik	55.87	160.31		Fo-hosted MI	91		2022	7.2			Gurenko (2021)
Kamchatka	Tolbachik	55.87	160.31		Fo-hosted MI	88.2		2633	11			Gurenko (2021)
Kamchatka	Tolbachik	55.87	160.31		Fo-hosted MI	88.2		2401	9.4			Gurenko (2021)
Kamchatka	Tolbachik	55.87	160.31		Fo-hosted MI	88.5		2455	8.5			Gurenko (2021)
Kamchatka	Tolbachik	55.87	160.31		Fo-hosted MI	88.2		2414	6.8			Gurenko (2021)
Kamchatka	Tolbachik	55.87	160.31		Fo-hosted MI	88.5		2249	6.3			Gurenko (2021)
Kamchatka	Tolbachik	55.87	160.31		Fo-hosted MI	88.5		2330	8.3			Gurenko (2021)
Kuril	Chikurachki	50.33	155.45	50.33	Fo-hosted MI	74.9		1527	6.73	7.46889	2.40437	Gurenko et al. (2018)
Kuril	Chikurachki	50.33	155.45		Fo-hosted MI	74.4		1775	6.94			Gurenko et al. (2018)
Kuril	Chikurachki	50.33	155.45		Fo-hosted MI	73.5		3418	10.14			Gurenko et al. (2018)
Kuril	Chikurachki	50.33	155.45		Fo-hosted MI	74.3		1612	4.19			Gurenko et al. (2018)
Kuril	Chikurachki	50.33	155.45		Fo-hosted MI	74.2		1735	7.02			Gurenko et al. (2018)
Kuril	Chikurachki	50.33	155.45		Fo-hosted MI	74.4		1509	5.45			Gurenko et al. (2018)
Kuril	Chikurachki	50.33	155.45		Fo-hosted MI	73.3		1737	7.64			Gurenko et al. (2018)
Kuril	Chikurachki	50.33	155.45		Fo-hosted MI	78.3		3450	12.25			Gurenko et al. (2018)
Kuril	Chikurachki	50.33	155.45		Fo-hosted MI	73.6		2156	6.86			Gurenko et al. (2018)
Lesser Antiless	St. Vincent	13.25	-61.18	13.25	Fo-hosted MI	85.657		1158.39	-2.47	0.47	4.3247	Bouvier et al. (2008)
Lesser Antiless	St. Vincent	13.25	-61.18		Fo-hosted MI	87.5671		1265.71	-4.78			Bouvier et al. (2008)
Lesser Antiless	St. Vincent	13.25	-61.18		Fo-hosted MI	84.8		1039.42	1.07			Bouvier et al. (2008)
Lesser Antiless	St. Vincent	13.25	-61.18		Fo-hosted MI	88.4		1007.12	2.8			Bouvier et al. (2008)
Lesser Antiless	St. Vincent	13.25	-61.18		Fo-hosted MI	84.9		1206.97	-7.32			Bouvier et al. (2008)
Lesser Antiless	St. Vincent	13.25	-61.18		Fo-hosted MI	86.9576		1093.06	2.95			Bouvier et al. (2008)
Lesser Antiless	St. Vincent	13.25	-61.18		Fo-hosted MI	85.1267		1378.8	5.49			Bouvier et al. (2008)
Lesser Antiless	St. Vincent	13.25	-61.18		Fo-hosted MI	88.603		1699.22	4.9			Bouvier et al. (2008)
Lesser Antiless	St. Vincent	13.25	-61.18		Fo-hosted MI	86.7995		1150.24	3.68			Bouvier et al. (2008)
Lesser Antiless	St. Vincent	13.25	-61.18		Fo-hosted MI	89.5664		1148.32	-1.62			Bouvier et al. (2008)
Cascades	BBL	40.5843	-121.617	40.5551	Fo-hosted MI	83.6127		1060.99	1.94059	4.00092	0.902343	Muth & Wallace (2021)
Cascades	BORG	40.6597	-121.239		Fo-hosted MI	83.9725		1508.04	5.44032			Muth & Wallace (2021)
Cascades	BORG	40.6597	-121.239		Fo-hosted MI	83.3349		1197.28	5.1468			Muth & Wallace (2021)
Cascades	BORG	40.6597	-121.239		Fo-hosted MI	85.2884		1130.93	4.1759			Muth & Wallace (2021)
Cascades	BORG	40.6597	-121.239		Fo-hosted MI	83.9836		1508	4.37911			Muth & Wallace (2021)
Cascades	BORG	40.6597	-121.239		Fo-hosted MI	82.7033		1440.44	4.08559			Muth & Wallace (2021)
Cascades	BRVB	40.5302	-121.075		Fo-hosted MI	85.4954		1635.18	3.4308			Muth & Wallace (2021)
Cascades	BRVB	40.5302	-121.075		Fo-hosted MI	84.0895		1240.6	3.81464			Muth & Wallace (2021)
Cascades	BRVB	40.5302	-121.075		Fo-hosted MI	85.1109		1235.84	3.81464			Muth & Wallace (2021)
Cascades	BRVB	40.5302	-121.075		Fo-hosted MI	83.655		1951.3	3.27275			Muth & Wallace (2021)
Cascades	BPPC	40.3288	-121.913		Fo-hosted MI	87.5		1007.93	4.04043			Muth & Wallace (2021)
Cascades	BPPC	40.3288	-121.913		Fo-hosted MI	87.2358		1141.99	4.46943			Muth & Wallace (2021)
Kamchatka	Avacha	52.95	158.95	52.95	Sp-hosted MI in harzburgite			1908	8.5	9.53333	1.00133	Bénard et al. (2018)
Kamchatka	Avacha	52.95	158.95		Sp-hosted MI in harzburgite			1713	10.1			Bénard et al. (2018)
Kamchatka	Avacha	52.95	158.95		Sp-hosted MI in harzburgite			1333	9.1			Bénard et al. (2018)
Kamchatka	Avacha	52.95	158.95		Sp-hosted MI in harzburgite			1147	10			Bénard et al. (2018)
Kamchatka	Avacha	52.95	158.95		Sp-hosted MI in harzburgite			1145	11			Bénard et al. (2018)
Kamchatka	Avacha	52.95	158.95		Sp-hosted MI in harzburgite			1338	8.5			Bénard et al. (2018)
Lesser Antiless	St. Kitts	17.35	-62.75	14.1729	Sulfide inclusion in cumulate				1.12	0.68	0.736614	Pollock (2021)
Lesser Antiless	Guadeloupe	16.26	-61.54		Sulfide inclusion in cumulate				1.4			Pollock (2021)
Lesser Antiless	Dominica	15.44	-61.34		Sulfide inclusion in cumulate				0.41			Pollock (2021)
Lesser Antiless	St. Vincent	13.25	-61.18		Sulfide inclusion in cumulate				0.17			Pollock (2021)
Lesser Antiless	Carriacou	12.48	-61.45		Sulfide inclusion in cumulate				1.75			Pollock (2021)
Lesser Antiless	Ronde	12.31	-61.58		Sulfide inclusion in cumulate				-0.13			Pollock (2021)
Lesser Antiless	Grenada	12.12	-61.69		Sulfide inclusion in cumulate				0.04			Pollock (2021)
Izu	Oshima	34.75	139.39	33.94	Basalt		53.5	9	5.3	4	1.83848	Ueda & Sakai (1984)
Izu	Hachijo-Jima	33.13	139.79		Basalt		47.2	22	2.7			Ueda & Sakai (1984)
Ryukyu	Karatsu	33.45	129.96	33.1	Basalt			30	4	4	0	Ueda & Sakai (1984)
Ryukyu	Nagasaki	32.75	129.87		Basalt		52.2	13	4			Ueda & Sakai (1984)
Honshu	Akita-Komagatake	39.79	140.84	38.944	Basalt		51.2	5	4.8	4.46	0.563915	Ueda & Sakai (1984)
Honshu	Akita-Komagatake	39.79	140.84		Basalt			7	4.2			Ueda & Sakai (1984)
Honshu	Akita-Komagatake	39.79	140.84		Basalt			25	5			Ueda & Sakai (1984)
Honshu	Nasu	37.04	140.1		Basalt		51.3	4	3.6			Ueda & Sakai (1984)
Honshu	Chokai	38.31	140.21		Basaltic andesite		54.9	24	4.7			Ueda & Sakai (1984)
Mariana	Kasuga	21.5	144	22.3571	Basalt		52.18	150	5.1	3.48571	1.55788	Alt et al. (1993)
Mariana	Kasuga	21.5	144		Basalt		52.26	120	5.5			Alt et al. (1993)
Mariana	Kasuga	21.5	144		Basaltic andesite		54.6	110	4			Alt et al. (1993)
Mariana	Eifuku	22	144.5		Basalt		52.7	20	4			Alt et al. (1993)
Mariana	S. Daikoku	22	144.5		Basaltic andesite		54.2	50	1.5			Alt et al. (1993)
Mariana	Iwo Jima	24	141.5		Basaltic andesite		56.2	170	1.6			Alt et al. (1993)
Mariana	Iwo Jima	24	141.5		Basaltic andesite			290	2.7			Alt et al. (1993)
Indonesia	Krakatau	-6.1	105.43	-7.76	Basalt		55.1	74	4.1	4.10463	1.2156	de Hoog et al. (2001)
Indonesia	Guntur	-6.98	110.58		Basalt		54.05	5.13	3.7			de Hoog et al. (2001)
Indonesia	Batur	-8.2	115.37		Basalt		53.17	11.56	4.17778			de Hoog et al. (2001)
Indonesia	Rinjani	-8.4	116.45		Basalt		54.25	24	3.25			de Hoog et al. (2001)
Indonesia	Boleng	-8.46	120.05		Basalt		51.7	64	6.4			de Hoog et al. (2001)
Indonesia	Werung	-8.42	123.47		Basalt		52.25	39	3			de Hoog et al. (2001)
Melt inclusion data are selected based on ther sulfur contents (>1000 ppm).
Whole-rock samples are selected based on their rock type (basalt), or SiO2 (<55 wt.%) or sulfur contents (>100 ppm).
References:
Alt, J. C., Shanks, W. C. & Jackson, M. C. Cycling of sulfur in subduction zones: The geochemistry of sulfur in the Mariana Island Arc and back-arc trough. Earth and Planetary Science Letters 119, 477–494 (1993).
Bénard, A. et al. Oxidising agents in sub-arc mantle melts link slab devolatilisation and arc magmas. Nat Commun 9, 3500 (2018).
Bouvier, A.-S., Métrich, N. & Deloule, E. Slab-Derived Fluids in the Magma Sources of St. Vincent (Lesser Antilles Arc): Volatile and Light Element Imprints. Journal of Petrology 49, 1427–1448 (2008).
de Hoog, J. C. M., Taylor, B. E. & van Bergen, M. J. Sulfur isotope systematics of basaltic lavas from Indonesia: implications for the sulfur cycle in subduction zones. Earth and Planetary Science Letters 189, 237–252 (2001).
Gurenko, A. A. Origin of sulphur in relation to silicate-sulphide immiscibility in Tolbachik primitive arc magma (Kamchatka, Russia): Insights from sulphur and boron isotopes. Chemical Geology 576, 120244 (2021).
Gurenko, A. A., Belousov, A. B., Kamenetsky, V. S. & Zelenski, M. E. Origin of volatiles emitted by Plinian mafic eruptions of the Chikurachki volcano, Kurile arc, Russia: Trace element, boron and sulphur isotope constraints. Chemical Geology 478, 131–147 (2018).
Kawaguchi, M. et al. Sulfur Isotope and Trace Element Systematics in Arc Magmas: Seeing through the Degassing via a Melt Inclusion Study of Kyushu Island Volcanoes, Japan. Journal of Petrology 63, egac061 (2022).
Muth, M. J. & Wallace, P. J. Slab-derived sulfate generates oxidized basaltic magmas in the southern Cascade arc (California, USA). Geology 49, 1177–1181 (2021).
Pollock, T. Sulfur Isotope Composition of Sulfides in Mafic Cumulates, Lesser Antilles Arc. (The University of Maine, 2021).
Taracsák, Z. et al. Sulfur from the subducted slab dominates the sulfur budget of the mantle wedge under volcanic arcs. Earth and Planetary Science Letters 602, 117948 (2023).
Ueda, A. & Sakai, H. Sulfur isotope study of Quaternary volcanic rocks from the Japanese Islands Arc. Geochimica et Cosmochimica Acta 48, 1837–1848 (1984).
